# Supplementary material for: A Methodological Framework for the Use of AI Tools in Automated Workflows for Generating Validated and Structured Historical Datasets
Source: Research Square preprint supplement (doi:10.21203/rs.3.rs-7943432/v1), 2025-11-17
Supplement: Supplementary file 5 [file Angel_de_Iturbide.docx]

%p1–Iturbide–2025–10–15%

N° 15 Libro de Cartas. Empieza, Junio 6 de 1870. Concluye,

Año de 1870[[1]](#footnote-0)[[2]](#footnote-1)

mal en alguna de mis cartas; porque, nunca hé variado de opinion respecto de la marcha de George Henderson. A nadie conozco mejor para el caso que George Henderson; pero, he tenido mis dudas sobre la necesidad de su viage: tu y Martinez de la Torre, hallandose mas cerca que yo, tienen mayor facilidad para juzgar de los diferentes lados de la materia. Y lo unico, que mi hijo y yo podemos hacer, es manifestar nuestro consentimiento á pagar la parte que debidamente nos corresponda en los gastos. = A Sabina le escribí de conformidad con tus indicaciones, encargandole que á tí te dijéra su parecer; y supongo que lo habrá hecho en la carta que de ella ahora te acompaña. = Créo que no tienes motivo para quejarte de ella; pues que, ademas de esta citada carta, te incluí una en la mia de abril 21, mandandote otra, hacia fines de Mayo, por con ducto de los Señores Martínez María del Comercia de México.- Espero que no haya habido extravío. = Escribiendole tú á Agustín C., no véo la necesidad de que yo lo haga; porque, al fin y al cabo, yo le habría de aconsejár, lo mismo que hice con Sabina; que se entendiéra contigo, directamente,- Con los mas sinceros deseos de ser servicial, estoi resuelto a evitar, en lo de adelante, inutiles responsabilidades. = Desde 21 de Abril te dije que, yá que la pobre de Pepa Manzanera habia fallecido, dispusieras de los consabidos $40 en beneficio de su hijo Agustín. Mas, para el caso de que no lo hayas hecho, ahora te autorizo para gastarlos en provecho de Concha ó de quien de los parientes mas los necesitare. Tú, que estás entre ellos, sabrás mejor que yo. = Los ligeros servicios que a mis parientes hé hecho, los hé hecho con el corazon en la mano; y me alegraré que ellos los hayan aceptado de buena voluntad. = Te equivocas sobre la salud de mi hijito. Es Sumamente fuerte, y unicamente adolece de la maldita propensión al garrotillo; y no dudo que ésta desaparezca con la edad. = Créo que Alicia te escribirá. - Muchas y cariñosas memorias á todos los parientes. = Como siempre tu muy afecto primo, = Angel de Iturbide

Rosedale= near George-town, D. C.

June 9th, 1870

Mep. de Iturbide = N° 1344 Spruce Street = Philadelphia. = My dear Sabina: = I have received your letter of the 29th of May, with the one which it enclosed for Pepe Malo; and said letter for Pepe is, now, on its way to Mexico. = But, as one good turn deserved another, could you not do me a favour? = It is possible, that I may pass the summer away from this place; but, the hotels at the springs are horribly dear. Now, I can think of no place except Bethlehem, and I should like to know not only the facilities for reading that toran, but like-wist, what kind of hotels are to be found and the price of board Hodging - Can you give me any information on those points, by asking it of some friends, without trouble to yourself? - At all events, let me know, as soon as may be, whether you can do so or not. = I have received a letter from Augustin C. dated May 18th. He appeared to be in good health. = we are all well. - Compliments from Mrs. Green, love from Alice and a kiss from my boy. = Your affectionate brother, = Angel

Mr. de Iturbide offers his compliments for Major and Mrs Reholson; regretting much that Mrs de Iturbide says, that she is afraid, on account of her mother's health, to hold any kind of celebration at Rosedale, = Thursday, = June 9 th.[[3]](#footnote-2)

Rosedale, = near George town, D. C.

June 15th, 1870[[4]](#footnote-3)

Mep. Richd. Irvin Co. = N. York. = Dear Sirs. = Be so very good as to discount my coupons, payable on the 1st of September, and send me a cheque, in gold, signed by yourselves. = I am, =dear Sirs = your obedient servant Angel de Iturbide

Rosedale, = near George town, D. C.

June 18th, 1870

Mep. de Iturbide = 1344 Spruce St = Pha. My dear Sabina = In answer to what you ask me in your letter of the 11th instant in regard to A.C.’ S coming to the U.S., I must tell now, that I have heard nothing of it.= I think, that he wishes to go to Mexico; but, I do not know how soon he may go.= I send you a letter from Pepe Malo, - If you want me to send your answer, you must remit it, at once. = Judging from my correspondence, you will soon get some money from the Alsua legacy. And I hope that Pepe tells you so. = Love from Mrs. Green, Alice & my darling boy. = Your affectionate brother, = Angel

Rosedale = near George-town, D. C.

June 18th, 1870

Mep. Richd Irvin Ho. = N. York. = Dear Sirs; = I beg you to be so kind as to advise me what should be the discount on my 10-40 Bonds due 1st September, from the 1st proximo, and including commission. = Truly Yours, = Angel de Iturbide

Rosedale, = cerca de George-town, D. C.

Junio 20 de 1870

Señor Licenciado Don Luis G. Zavala = Morelia. = Mi estimado Amigo y Señor. = Con su apreciable carta de Mayo 20 pasado he recibido la liquidacion a que se refiere; dando á V. las debidas gracias. = Los $300, rebaja por perdidas en Puruarán, y los $336.62 por un prestamo forzoso del Gral Mendez, forman dos partidas que pueden muy bien disputarse. = Además, la cantidad de $7 489. 91 por gastos y honorarios es -permítame V. decirlo- excesiva, haciendo comparacion con la hémos recibido los legatarios de los $50.000; pero, el Sr Martinez de la Torre quiza formará diviersa opinion, en vista de la cuenta razonada que V. le presente. = Esperando que, por fin, se alcance un arreglo definitivo de los legados Manuel Alsua y Huarte, me es grato repetirme de V. = afmo amigo S. S. q.b.s.m. = Angel de Iturbide

Rosedale= near George - town, D. C.

June 20 th;1870

George F. Henderson Esq.= Morelia. = My dear Henderson: = I am in receipt of your favour of the 25th ultimo, with its accompanying diary to the same date and the Lic. Zavala's letter & liquidation. = By my answer to that gentleman, which please peruse, you will see my, opinion regarding three items of the liquidation.= I confess, that I do not see, why the Lic. Zavala has not, heretofore, ached more promptly on the Huarte legacy; and I am certain, that a few instalments were paid, though my cousin Pepe Malo is better informed than I of the amount. = As the Iturbide Suit on Apeo belongs entirely to questions on law; I do not very well see how any instructions to you from me could further our interests in the matter. - Both Martínez de la Torre & D. Miguel Martinez write me, that they are now acting in concern. = You do not tell me the terms upon which you, at last, went to Morelia. = Seven months are now due on the $57.000, and Martínez de la Torre writes me, that he was about to make "un cobro serio al representante de D. Ignacio Amor de los réditos." - I hope the result will be favourable. = I hope, indeed, that you may succeed in arranging the Morelia legacies; and should you come to this country, I shall be most thankful for such services as you may be able to render the Iturbide family. = Araoz has not sent the Revue. = Wishing you all happiness, and looking out for your promised letter per French Steamer = I am = truly yours, = Angel de Iturbide.

This goes through Martínez de la Torre. = Al. de I.

Rosedale = cerca de George town, D.C.

Junio 21 de 1870

Sr Lic. = D. R. Martinez de la Torre = México. Mi muy querido amigo. = Son en mi poder su apreciable de 29 del pasado y la carta de George Henderson de Morelía, cuya contestación acompaño, suplicando á V. que me haga el favor de remitirla. = Con fha. de ayer digo, entre otras cosas, lo siguiente al Sr. Lic. Zavala. "Los $300, rebaja por perdidas en Puruarán, y los $336.62 por un prestamo forzoso" de hasta "cuenta razonada que V. le presente". = Me felicito por las conferencias que ha tenido V. con el Lic. D. Miguel Martínez; teniendo esperanzas de que saquemos algunos pesos del litigio sobre apeo = Aguardo, con impaciencia, la correspondencia por el Paquete frances; porque, segun sus promesas de V., debe traerme el resultado del serio cobro que estaba V. resuelto á hacer al representante de D. Ignacio Amor. = Yá son siete meses los que se adeudan de réditos, y tal falta de puntualidad es difícil de explicar. - Y, tambien, hay que pensar en los primeros $28.500, pagaderos en 30 del próximo Setiembre. = Reciprocando sus expres. á mi familia, me dejo de V. como siempre muy afecto. Amigo q. b. S. m. = Angel de Iturbide.

¿Que no querrán por fin los albaceas de los Sres Echeverria someter á arbitros la cuestión de réditos del dinero que prestaron a la familia Iturbide? = Al de I.

Rosedale, = cerca de George-town, D.C.

Junio 21 de 1870[[5]](#footnote-4)

Sr. D. José R. Malo = México = Mi muy querido Pepe.: = Tengo por delante tu apreciable de 25 del pasado

Rosedale = cerca de George-town, D. C. [[6]](#footnote-5)

Junio 21 de 1870

Sr. D. José R. Malo = México = Mi muy querido Pepe: = Tengo por delante tu apreciable de 25 del pasado; habiendo remitido á Sabina la carta que le escribiste y entregado á Alicia la amable de Conselice con la fotografía de los niños: nos parecen muy bonitos estos y bien sacado su retrato.- Si Sabina me enviare á tiempo su contestación, te la acompañaré. En efecto, hé recibido carta de Henderson de Morelia; y me felicitaré con mis demás colegatarios de que su viaje de por resultado, no solo el pago de los réditos, sino el arreglo definitivo y seguro para el pago del capital. De otro modo, me temo mucho que las buenas intenciones de Manuel Alsua para con nosotros queden burladas, casi enteramente. = En la liquidacion de réditos - de la cual debes tú yá tener copia - se nos cargan mancomunadamente á mi hijo y á mí las cantidades que recebió Agustin G. y las que yo hé recibido. Estoi completamente conforme con tu opinion de que de tal modo será mas facil el reparto: yo no quiero sacar ventaja ninguna sobre mis hermanos, pero, si ellos se cruzan los brazos, yo nunca lo hé de hacer. = Volviendo á la liquídacion del Lic. Zavala le digo, ayer: “Los $300, rebaja por perdidas en Puruarán y los $336.62 por un" de hasta "que V. le presente." = En efecto, Pepe, es absurdo lo que carga Zavala, hasta donde yo tengo datos para juzgar; y, si la cosa sigue, moriremos nosotros, y nuestros hijos tendrán que contentarse con las cuentas del Gran Capitan. = Otro punto sobre el cual no hé querido escribir á Zavala, sin consultar contigo previamente. - En la deduccion comun, habrás notado la partida que dice: "Remision al Sr Malo para la familia - $1.700." = Hé examinado mis cuentas y de ellas deduzes, que unicamente te há remitido Zavala la cantidad de mil ciento veinticinco pesos.-Dime si tengo razon, ó en qué consiste mi error.- Tu carta de Set. 20 de 66 - habla de 600 ps., la de Julio 17 - 67, de 525 ps. Si alguna otra carta me hás escrito que trate del deficit de 655 ps., yo nunca la hé recibido. Digo 655 ps.; por que Zavala carga $80 por situación en México de los $1.700. = Yá en 6 del actual te dije que podias disponer de los 40 ps. en beneficio de Concha, caso de créerla tú mas necesitada que su hermano Agustín.- Considero que Martinez de la T. tiene fondos en su poder de los cuales pueda yo disponer pa. cubrir los 40 ps: si se negare á pagar mi carta orden, veremos a ver de donde sacamos la repetida cantidad. = Alicia queda aguardando tu carta; creo que se la debes.= Algo te tiembla la mano; mas, tienes la misma claridad que antes en las ideas y dále gracias a Dios por tán fuerte beneficio, á tu edad. = Alicia te manda muchas memorias y mi hijito. te devuelve un muy estrecho abrazo = En otra ocasion, quizá te esplicaré eso de la pesadez de la pluma.- No se por qué los Albaceas de los Sres Echeverria no quieren someter á arbitros - segun entiendo - la cuestion de réditos, = Saludanos cariñosamente á los parientes, y crée que te ama tu primo, - Angel de Iturbide. = Escusame los borrones pero escribo de prisa.

Rosedale, = cerca de George-town, D. C.

Junio 22 de 1870

Sres J. Rafecas Ha= Habana. = Muy Sres mios: = En 23 del pasado, contestando a su grata de 7 del propio mes, supliqué a V.V. que me acusaran recibo de la correspondencia que entonces remitía. - Seguramente la carta de V.V. a ese efecto se habrá extraviado. = Mas, ahora, espero que me harán el favor de decirme que hán recibido las adjuntas para México; Siendome importantes. = Aprovecho la ocasion de repetirme su afmo. S. S. q.b.s.m. Angel de Iturbide

Rosedale = near Geo-town = D. C. = June 27th, 1817.

Mep de Iturbide = 1344 Spruce Street = Philadelphia = my dear Sabina.= Why do you not answer my letter? - Are you sick? -You know I sent you, on the 18th, a letter from Pepe Malo, in which I think he must have given you good news in regard to the Manuel Alsua legacy. - I wish, whenever I send you letters. from others, that you would immediately acknowledge their receipt; for, I am always afraid of miscarriages.= How are you getting on with the warm weather? Here, it is insufferable, Indeed, if it continue, I shall go to some watering place or other; even for a few days.= Mrs. Green's compliments to you, together with Alice’s love & a Kiss from my boy.= Ever your affectionate brother, = Angel

In a letter written by Alice on July 2nd - I say, July 3rd/70, to Sabina - I have, my dear Sabina, read your letter of June 30th - affectionately = Angel

Rosedale = Cerca de George-town, D. C.

Julio 8 de 1870

Sr. Lic. D. Miguel Martínez = México. = Mi muy estimado Amigo y Sr. = Habiendome enterado detenidamente de cuanto se sirve V. comunicarme en su grata de 28 de Mayo pasado, véo, con satisfaccion, que, vencidas ciertas dificultades, están resueltos el Sr Martinez de la Torre y V. á seguir sus gestiones, hasta concluir el asunto sobre Apeo. = Y, á la vez, quedo esperando, con alguna impaciencia, sus nuevas cartas; porque muchos años han pasado, desde que se comenzó el litigio en cuestión. = Deseando á V. la mejor salud, asi como a su apreciable Señora y familia, repitome su afmo. Amigo S. S. q. b. s. m. = Angel de Iturbide

Rosedale = cerca de George-Town, D. C.

Julio 11 de 1870[[7]](#footnote-6)

Sres D. Antonio Escandon y Lic. D. R. Martínez de la Torre= México. = Mis queridos Amigos: = Recuerdo á V.V. que sobre los consabidos $57.000 se me adeudan ocho meses de réditos; es decir, la cantidad hasta el 30 del ppdo. Junio- de $3.040 -, al 8% anual. = Sin tener motivo de saber, si les séa a V.V. satisfactorio lo que ha pasado y está pasando en éste asunto del dinero que mi hermano dejó á mi hijo, me repito de V.V. a dicho amigo q. b. s. m. = Angel de Iturbide

Rosedale, = cerca de George-town D. C.

Julio 11 de 1870

Sr D. Manuel Araoz= México = Mi siempre estimado amigo y Sr. = Hé tenido el gusto de recibir la apreciable carta de V. fha. 11 del pasado, con la revista del Trait d´ Union del día anterior. = Me alegraré sobremanera, como bien puede V. imaginar, que se realicen las esperanzas de Henderson en Morelía. -Algo estraño, que solo una vez me haya escrito desde aquella ciudad; habiendo remitido mi contestacion, en 21 del pasado, al Sr Martínez de la Torre, á quien entonces tambien escribí. = Tenga V. la bondad de entregar a este último la adjunta carta; diciéndole, en mi nombre, que quedo ansiosamente aguardando saber el resultado del serio cobro que, en la semana de Mayo 29, se proponía hacer al representante de D. Ignacio amor, de réditos. = Enterado de cuanto me comunica V. respecto de los citados réditos, estoi convencido de que me los remitirá, luego que los cobre.- Reciba V. mis cumplidas gracias por sus gestiones. = A la vez, agradezco sus atenciones para con mi familia, ofreciendole nueva seguridad del verdadero afecto de su amigo S.S.q.b.s.m. Angel de Iturbide

Rosedale = near George-town, D. C.

July. 11th, 1870

Mep. Austin Baldwin & Co. = American – European - Express= N°. 72 Broadway = N. York. = Gentlemen: = Being impatient to receive a package for me with clothes from London, - which is overdue - I take the liberty of asking, if, perchance, it has reached you; under consignment to Mess. Weston & Gray of your City. = I remain your - obedient Servant = Angel de Iturbide

Rosedale = cerca de George-town, D. C.

Julio 13 de 1870.

Sr D. Agustin C. de Iturbide= Neuilly sur Seine.= Mi muy querido Agustín. = Mi carta de Abril 27 puede casi servir de contestación á la tuya de Mayo 5: Pero, no tienes razon para imaginarte que ni yo ni Alicia te olvidamos; muy, por lo contrario, hablamos con mucha frecuencia de ti, y ahora, solo aguardaba que Alicia recibiera tu respuesta á la carta que te dirigió hace mas de un mes, para ocuparme de lo que me  dices en 18 del citado Mayo.- Pero, no le escribes á Alicia, y quizá estarás enfermo. = En efecto há muerto Pepa Manzanera, despues de una larga y penosa enfermedad en la cual dió pruebas de resignacion y paciencia. Como habras sabido de Pepe Malo, su hijo de Pepa, Agustín, ha quedado atrás en un estado lamentable. = Soi completamente de tu opinion, que los Echeverria no tienen derecho a cobrarnos réditos. Mas, tienen en su poder nuestros bonos, y mucho me temo que no quieran someter la cuestión á arbitros. = Yo, también, quisiera vender la parte que me toca en los terrenos de Sonora, pero, no veo modo de hacerlo, ni tengo conocimiento de lo que Isham haya conseguido de la Lower California Company. Ni creo, que nos lo diga. = Dudo mucho que el actual Gob. Mexicano tome en consideracion lo que pudieramos alegar respecto de los arreglos con Maximiliano; aunque si tengo muy presente, que Pepa y Salvador siguen con sus titulos. = Las últimas noticias, que de México tengo, son favorables en lo tocante al legado Manuel Alsua. Nada agrego; porque Pepe Malo le habrá comunicado, indudablemente, cuanto haya de saberse.= Hé visto por los diarios, que por allá há habido secos y fuertes calores. Aqui, han caído fuertes aguaceros, despues de algunos dias de una temperatura insoportable. Alicia y nuestro chiquillo están sin novedad: recibe muy cariñosas memorias de la primera, que aguarda tu carta con ansias; el segundo te manda un beso dulce, como él sabe darlos. = Que esta carta te encuentre con perfecta salud, y no dudes que soi invariablemente tu muy adicto hermano y amigo, = Angel

Te acompaño una fotografía sacada de un Daguerreotipo, que á su vez, fué tomado de la miniatura que recordarás de Chucha. No le hace favor; sin embargo, algo se le parece.- Sabina estaba fuera.= Angel

Rosedale = near George-town, D. C.

July 14 th, 1870[[8]](#footnote-7)

Mep. Hill Brothers= 3 Old Bond Street = London = Gentlemen: = Your letter of the 9th June, in acknowledgment of mine of the 20th May, came to hand three weeks ago; and, since then, I have heard nothing further of the clothes to which they refer and which I want.= Has there been, on your part, delay in making or forwarding the same? Or, has there been some misdirection? - as I have a little impatience, I would thank you to be so good as to advise me there on, without loss of Steamer. = Yours = Angel de Iturbide

Rosedale = cerca de George-Town, D. C.

Julio 16 de 1870

Sr Lic. D. Luis G. Zavala = Morelia. = Mi estimado Amigo y Sr. = En 9 y 22 de Mayo y 20 de Junio he escrito á V., sin recibir contestación. = En 6 del citado Junio, me dice el Sr Henderson que por el propio paquete me dirigía V. una carta, que por cierto no he recibido. Y, como su contenido debe haber sido importante a juzgar por las palabras de dicho Sr Henderson, suplico á V. que se sirva tener la bondad de comunicármelo de nuevo. agregando cuanto, hasta la fecha, séa conducente al estado, que guardaren los legados Alsua y Huarte. = Hagamé V. el favor de saludar en mi nombre a su apreciable familia, mandando a su afmo amigo S. S. q.b.s.m. = Angel de Iturbide

Rosedale= near George-town, D. C.

July 16th 1870

George F. Henderson Esq = Mexico or Morelía.= My dear George Henderson: = On yesterday I received your favour of the 6th ultimo; the delay is erring to its not reaching Araoz, till after mailing his to me of the 11th. = My last letters to you were dated, May 22nd and June 6th & 20th; and I again, particularly, draw your attention to what I say in regard to the Lic. Zavala's account; you taking care to bring my points to Martínez de la Torre´s notice, notwithstanding I wrote him thereon. = I have carefully read your details on both legacies, and I see that your visit to Morelia has been of service to the Iturbide family. = But, I am very much in the dark as to final result; for, you did not write to me, by the English steamer, and the Lic. Zavala did not do so, by the French Packet, as you will see by the accompanying letter, which please read & deliver, or send. - At all events, Araoz says, that the Lic. Martínez de la Torre is content with what you have accomplished. So that I judge, that he will be in favour of your returning; my boy & myself being ready, as before, to pay our proper share of the expenses & perquisites.= Araoz, under date of the 29th June, tells me, that they had received from Pepe Ansoetegui $2.280, in payment to the 30th of April. But, as my bad luck would have it, the 29th was a feast day, & the money could not be sent; & I hope, that no new obstacle will have prevented its remittance by the American or French Steamer. God knows.- All this is very prejudicial. = Your informe on the Huarte legacy, seems to me very satisfactory; thought I am sorry, that I do not know what has happened after June 6th. = This is a strange people. News reached here, yesterday, that, France had at two o' clock declared war upon Prussia. And, notwithstanding, Congress, with the full knowledge, that such was or would be the case, adjourned till December; as much as to say, that, for all they cared, Europe might be in flames. Now, we all know that a war between, two such powers as Prussia and France - even if it should not extend - must produce its consequences upon the monetary & commercial affairs of all nations. To this country such as war may or may not be advantageous; but, we already begin to feel its effects in the Stock & Gold markets - it could not be, otherwise. = Madame de Iturbide sends you her compliments & my Agustin thanks you for thinking of him. = Very truly yours. = Angel de Iturbide

The weather is terribly hot.

Jul 17th/70 - See to it, that Martinez de la Torre & Antonio Escandon demand the $28.500 on or before the 30th of September = Al. de I.

Rosedale = cerca de George-town, D. C.

Julio 17 de 1870

Sr D. Manuel Araoz = México. = Mi muy estimado amigo y Sr: = Inclusas en su grata carta de 29 del pasado hán llegado la de Henderson y la Revista correspondiente del Trait d´ Union. = Felicitandome, sobremanera, de que, por fin, se hayan pagado al Sr Martinez de la Torre seis meses de los réditos vencidos sobre los $57.000, no puedo menos de quejarme de mi mala suerte; porque, no pudo, desde luego, remitírteme la indicada cantidad. - Con las demoras y faltas de puntualidad se me ocasionan, además de molestias, serios daños y perjuicios. = Pero, aún cuando me hayan venido los $2.280 citados, se me adeudaran Mayo, Junio y los dias, hasta la fecha, de este Julio. = Y, en el muy importante concepto de que, en 30 del próximo venidero setiembre, hay solemne obligacion de entregarme la primera mitad del capital que se me reconoce, ó sea la suma de $28.500.- Por lo mismo, encargo a V., muy encarecidamente, que, en mi nombre, diga a los Sres D. R. Martinez de la Torre y D. Antonio Escandon, que estoi confiando en que tendrán cuidado del cumplimiento de tan importante clausula del contrato de Octubre de 1868, exigiendo, a su debido tiempo, el pago de la dicha primera parte del capital de $57.000. = Acompaño la adjunta contestacion, que ruego a V. tenga la bondad de entregar ó remitir á Henderson, cuya carta, por su atraso, no me participa el definitivo resultado de su viaje.- Pero, sin contar con que Henderson es empeñoso y activo, es buena señal que el Sr Martínez de la Torre esté contento. = De buenas ganas, y agradeciendo los buenos deseos que me manifiesta V. de verme, me establecería, pronto, en México.- Las pasiones políticas exigieron nuestro destierro, en nuestros primeros años; tuvimos que salir de México, otra vez y en reciente epoca; y, quizá nuestra mala estrella pedirá, que nosotros los hijos de D. Agustín de Iturbide pasemos los días de la vejez, lejos del lugar en que reposan los huesos del Libertador de su patria. = Mi esposa manda a V. sus cumplimientos con un beso de mi Chiquillo, y yo me repito, como Siempre, su afmo amigo S.S. q.b.s.m. = Angel de Iturbide Juilo 18 de 70.- Diganle V., por mi, á D. Antonio Escandon,[[9]](#footnote-8)

Rosedale = cerca de George town, D. C.

Julio 18 de 1870

Sres J. Rafecas Ha. = Habana.- Muy Sres mios: Escribí á V.V. con fechas de Mayo 23 y Junio 22, y aunque pedí contestación, ninguno hé tenido. = No sé á que atribuirlo; pero, empieza a parecerme que alguna casa ha sucedido, la cual me es imposible adivinar.= Para mi hán sido agradables las relaciones que, por escrito asi como personalmente, hé llevado con V.V. ; siendome, á la vez, importante el servicio que me hacen de recibir y trasmitir mi correspondencia. = Por tales motivos, quedo esperando con impaciencia una franca contestación suya; y me es grato repetirme, entretanto, de V.V. afmo Amigo = S. S. q.b.s.m. = Angel de Iturbide

Ruego a V.V. que tengan la bondad de encaminar a México la adjunta carta. = Al. de I

Rosedale = near George - Town, D. C.

July 18th, 1870

Mep. Weston & Gray = N. York. = Dear Sirs: = In being important to me to avoid all chances of miscarriage for the enclosure, I beg you to be so good as to forward the same, per first Steamer to Havana. = And, I am expecting a box from England, which I think will come to Mep. Austin Baldwin & Co. & to your consignment.- Should it come, will you do me the favour to see that they pay the duties & forward to me, with as little delay as possible. = I remain, = dear Sirs, = Your obedient Servant, = Angel de Iturbide

Rosedale = near George-town, D. C.

July 22nd, 1870

Mep Austin Baldwin & Co. = American-European - Express Co. = N.° 72 Broadway = N. York. Gentlemen! = In answer to your notice of this 22nd[[10]](#footnote-9) instant, I beg you to do me the favour to pay the duties of the case which has arrived per Steamer Washington[[11]](#footnote-10); which duties Mep. Weston & Gray of your City - N.° 64 South St- will reimburse to you in my name, according to their anticipated & kind promise. = And I would ask of you the favour to forward, with the least possible delay, the case to me at George-town, D. C., per Adams Express. = I remain your obedt. Servt. = Angel de Iturbide

Rosedele= near George-town, D.C.

Julio 23 de 1870 [[12]](#footnote-11)

Sres D. Antonio Escandon y Lic. D. R. Martínez de la Torre = México. = Mis queridos amigos: = Há llegado el paquete Americano, sin traerme la libranza equivalente a los $2.280, que llevaban, no se cuanto tiempo, de hallarse en sus manos. Tal falta de comedimiento y de consideracion, por parte de V.V. para conmigo, no puedo explicarla; pero, - ademas de ocasionarme sendas molestias que no hay necesidad de tomar en cuenta - acarrea verdaderos perjuicios pecuniarios á mi hijo. Espero, sin embargo, que la citada libranza me vendrá con mi correspondencia del paquete frances; es decir, dentro de seis ó siete dias: aunque, por otro lado el hecho es, que en la actualidad se mi adeudan cerca de nueve meses de réditos sobre los consabidos $57.000. = En 30 de Setiembre del corriente año debe entregarseme la primera mitad de tales $57.000, y, por lo mismo, ruego a V.V. del modo mas encarecido, que exijan, en tiempo habil y oportuno, el pago de la cantidad de $28.500 Si V.V. se cruzan los brazos y no cuidan del cumplimiento de las estipulaciones del contrato de Octubre de 1868; contrato, según ántes les hé manifestado, muy favorable a la Testamentaría de D. Manuel Escandon, entonces, el obvio resultado será, que mi hijo pierda el capital de $57.000; que reconoce la Hacienda de Sn. Gabriel, como parte de los bienes de la citada Testamentaría.- Esto lo saben V.V. mejor que yo. = Aguardando la contestacion a la presente carta, me refuto, como siempre de V. V. adicto amigo q.b.s.m. = Angel de Iturbide

Rosedale=cerca de George-town, D. C.

Julio 23 de 1870

Sr. Lic. = D. Luis Zavala = Morelía. = Mi estimada amigo y Sr. = Notablemente atrasada recibí, ayer, su apreciable carta de Junio 6, á la cual hice referencia en la mía de 16 del actual mes, y es de suponerse que yá habrán llegado a sus manos las que dirigi á V. en Mayo 9 y 22 y Junio 20.- Tambien, le escribí en 16 de éste mes, como acabo de decir = Respecto del legado Alsua, saco en limpio, que pagará el deudor $6.000 por cuenta de los réditos, de cuya cantidad no tendremos mi hijo y yo opción á recibir sino $147.79 1/2 que, segun la cuenta de V. de 25 de Mayo ppdo, se nos adeudan de tales réditos.- Y, lejos de imaginar la menor objecion, me felicito de que mis colegatarios reciban, en cuanto antes, las cantidades que deban igualarnos con mi hijo y conmigo. = Pero, por el lado contrario, vea con sentimiento que las cosas presentan, en la actualidad, un aspecto mucho menos favorable que en Marzo, cuando dirigió V. sus consabidas cartas al Sr. Lic. Martínez de la Torre, en lo tocante al pago del Capital, también. = En fin, infiero y conozco que a mi hijo y a mi no nos queda otro recurso que el de aguardar hasta setiembre, con la esperanza, que siempre queda en semejantes casos, de lograr el fin algun arreglo definitivo. = Pasemos, pues, al legado Huarte. - Deduzco de la relacion de V., que hay probabilidad del pronto pago por D. Vicente Sanchez de unos cinco o seis mil pesos; asi como que los otros dos períodos ofrecen embarazos y dificultades, aunque sea claro el camino que haya de recorrerse. Doi a V., en la parte que a mi hijo y á mi nos toca, cumplidas gracias lo mismo que al Sr Henderson, de que, al fin, algo de lo vencido se cobre y de que en lo venidero de paguen los réditos, con puntualidad.- Me alegraré que haya entendido bien. = Yá en varias ocasiones hé manifestado á V. que en todo lo relativo á éste legado Huarte mucho mas al tanto que yo se encuentra mi primo D. José R. Malo. = Quedo aguardando los nuevos informes que V. me ofrece, y aprovecho la ocasion de repetirme su afmo Amigo S. S. q. b. s. m. = Angel de Iturbide

Rosedale, = Cerca de George-town, D.C.

Julio 24 de 1870

Sr Don José R. Malo, = México. = Mi querido Pepe: = Mareadamente atrasada ha llegado a mis manos tu apreciable carta de 18 del pasado, con la que me dirigió en 6 del mismo el Lic. Zavala y la que tú diriges para Sabina. = Inmediatamente marchó para Filadelfia la suya á Sabina, quien ha recibido todas las que, por mi conducto, le hás escrito, anteriormente. = Mi contestación á Zavala la mando, por conducto de Henderson; á fin de que no tengas que desembolsar los dos reales del porte de México a Morelia. = Espero, que hayas notado cuanto te dije en Junio 21 ppdo sobre la cuenta del Lic. Zavala de Mayo de 25 ppdo., no dudando que con referencia á ella me hayas contestado, según te lo pedí. = Queda Alicia aguardando la Carta que le prometes, tanto mas cuanto créa que alguna le debes: entre tanto, te manda muy afectuosas memorias lo mismo que a los demas parientes, alegrandonos que no tengan novedad.- Saludalas a todos en mi nombre. = Tambien nosotros estamos buenos, aunque sufriendo del calor, particularmente yo. - Lo peor es, que en éste clima las noches son tan purgatoriamente dolorosas Como los dias.- Sucumbe el fisico y el intelecto. Digalo si no el suicidio de Prevost Paradol, hombre distinguido, que acababa de presentar sus credenciales de Ministro frances. - No hay duda de que los tremendos rayos de éste sal y la debilidad, que los insomnios producen, tuvieron mucho que hacer con su fin fatal; fin, que verdaderamente há causado dolor y gran sorpresa. = Aún no corre sangre entre Franceses y Prusianos, con grave disgusto de los que se complacen en las tormentas humanas. - Quien sabe si los esfuerzos de las otras potencias y con especialidad los de Inglaterra en favor de la paz pongan fin á la guerra antes de que haya comenzado; aunque no lo creo. = Como siempre, tu muy afecto primo = Angel de Iturbide

Rosedale = near George-town, D.C.

July 24th 1870

George F. Henderson Esq.= México. = My dear Henderson: = On the 16th I answered your favour of June 6th, having, now, the pleasure to acknowledge the receipt of that of the 6th instant; enclosing copies of letters of June 1st & 18th from you to Ansoategui & from him to you, = What Ansoategui writes to you is completely at variance with Araoz´s statement to me, of the 29th of June; Araoz declaring, that it was only late in the day, of the 28th, that Martínez de la Torre received from Ansoategui the $2.280 to which you refer, and that, The 29th being a feast day, the money would have to be sent by the American Steamer. = The only charitable interpretation to be put on the words of Araoz must be based upon his wish to excuse Martínez de la Torre´s Carelessness, as you are pleased to hear it. - Anto. Escandon is as much to blame as Martínez de la Torne, & both have ached in a strange manner.- As for yourself -and without implying censure I regret, that, with your knowledge of matters, you did not think of taking care, even though in Morelia, that the money was sent to me by the English Steamer.- I am, likewise, sorry that you did not remit the 1st of Exchange per American Steamer; because it would have come to hand, two days ago, and the 2nd of Exchange would have reached me with my correspondence per French Steamer, which, if I am not mistaken, arrived at Havana Monday[[13]](#footnote-12), the 17th. So that, at the earliest, I will not receive the 1st of Exchange, before Friday, the 29th; for, almost invariably, Rafecas Ha. forward my letters by the N. York Steamers which sail on saturdies: and, the 2nd of Exchange may not arrive, till the 19th. of 20th of August. Then, I will be able to negotiate the Bill, and, perhaps, not before; since the Bankers here do not like, as a rule, to take Bills, unless you give the 2nd of Exchange with the first. - One month, at least, shall I have last; my calculations being, that, set at fault, particularly on account of the war in Europe, and all this, through the negligence of Antonio Escandon and Martinez de la Torre, both of whom, as moneyed men, fully appreciate the importance of holding a certain amount of cash, at the proper moments, - In the mean time, besides, I am placed in most disagreeable suspense for several days, fearing that you may have fallen sick, or that some unforeseen obstacle may have presented itself to both those gentlemen, depriving me for a still longer period of my money, = However, I will take heart, not doubting your promise that the bill has, without fail, been forwarded by the French Steamer, keep cool for another week. = I have made so long an explanation to prove to you, that the manner, in which Martínez de la Torre and Antonio Escandon choose to act, is enough to try the patience of the most phlegmatic fool. = With this mail. I write to them, conjointly. - I tell them that the $2,280 have not come, & I endeavour to impress upon them the necessity of demanding, en tiempo habil y oportuno, the payment of the $28.500 due on the 30th of September next, - I hope you will do all in your power to further to so important an end. = I see that you had but little expectation that she interest for May & June would be paid in time for the French Steamer, and of course I am not delighted.=Be so kind as to deliver & forward the enclosed to D. Pepe Malo & the Lic. Zavala, - Read my letter to Zavala, for it comprises pretty much all I have to say on the Morelia legacies, promising to write you when I receive the details yon promise me. I am anxious; for, you intimate that there are serious points which require my consideration. = I suppose that my son myself will receive out of the $6000 the sum of $147, due us for interest, on Alsua legacy, even according to Zavala´s account, Call Martínez de la Torre´s and Pepe Malo's attention to what on June 21st I wrote them on several items of that account, You, undoubtedly, have complied with my request and have noted what on June 20th I said to Zavala himself; as I requested you, = As neither you nor Martínez de la Torre has advised me of your definitive arrangement before your leaving for Morelia, I am in the dark regarding the commission you were to receive. - I am certain you worked well, = I have not heard a word of or from Isham, since I sent him, months ago, my counter-proposals on our Upper Cal. claim. = The weather Continues suffocating & the papers declare that it is no better in Europe. - What a jolly time French & Prussians will have, if the fighting commence. = Very truly yours = Angel de Iturbide Anything about Apeo? = Al de I.

Rosedale= near George-town, D. C.

July 27th, 1870

Mep. Weston & Gray = N. York. = Dear Sirs: = I should like to draw upon Mr. V. Marcó del Pont of N°. 35 Rue St. Georges, Paris, at three days sight, for from fifteen to twenty thousand francs.- In what manner & on what terms can it be done, to my best advantage? = Mep. Galwey & Casado of your City have business Relations with Mr. Marcó del Pont, who, in his turn, is - if I am not mistaken = the Paris Correspondent & agent of Mep. Anty. Gibbs & sons of London. And I am willing, on my part, that the Gold, resulting from my draft, be deposited with you, until the same be paid. = Perhaps, it would be to my profit, that the money should be handed to me, Whenever it be ascertained, through the cable, that the draft has paid; the telegram being on my account.= Or, how and on what terms could a transfer of funds be made, at once, through the Atlantic telegraph? = The case, which I was expecting, has come eight or nine days ago, to Mep. Austin Baldwin & Co.; and I would ask you to do me the favour to add to the duties thereon, my in debtedness to you for postage, - duly advising me of the whole amount. = I remain, = dear Sirs, = Your obedient Servant = Angel de Iturbide

Washington City, D. C.

Julio 28 de 1870[[14]](#footnote-13)

Sr. D. V. Marcó del Pont = N° 35 Rue St Georges, = Paris. = Mi estimado Amigo y Sr. = Con fecha de hoy he librado, á tres dias vista, contra V. una letra de cambio a favor de los Sres. Aug. Belmont & Co. de N. York por la cantidad de quince mil francos (Fr. 15. 000), que me hará V. el favor de cargarme a la cuenta corriente que tengo, como Albacea de mi difunto hermano D. Agustín á V. que tenga el gusto de seguir con V. = Ruego á V. que tenga la bondad de avisarme que así lo he hecho. "Care of Mep. Weston & Gray, N. York." = Me es grato repetirme siempre de V. afmo amigo S. S. q.b.s.m. Angel de Iturbide

Rosedale = near George- town, D. C.

July 31st, 1870

Mep. Weston & Gray = N. York. = Dear Sirs: = Being in receipt of your esteemed favour of the 29th instant, I beg to say -thanking you truly for your kind offer - that I do not think that the terms adverted would be advantageous to me; for, I can not tell what the difference between frames & pounds sterling might he nor of the rate of Exchange between N. York & London at the time when my bill would be paid. – I should I change my mind, & you be still kindly inclined to serve me - some weeks hence = I will write you. = On the 22nd inst:, in answer to Mep Austin Baldwin & Co.´s notice of the 20th, I say "which duties" (on the box) "Mep Weston & Gray of your city - N° 64 South St. - Will reimburse to you in my name, according to their anticipates & kind promise." - And, I hope that I shall find the box here on my return to the District from which I intend to absent myself for a few days. = I remain, = dear Sirs; = your obliged & obedient Servant, Angel de Iturbide

Rosedale= cerca de George-town D.C.

Julio 31 de 1870 [[15]](#footnote-14)

Sr. Lic. = D. R. Martínez de la Torre = Mexico = Ayer llegó á mis manos su carta de 9 del actual, y en ella vino - aunque algo tardía la libranza de £ 2,29. 17.6, equivalente, El Cobro de 45 ¼ c, á $2.280,- Girada el 11, la endosaron los Sres Antonio Escandon el 9; mas, espero que semejante error no me cause malobra. = De todos modos, se la agradezco á V. mucho; esperando la 2a. de cambio. = Quedan, pues, por pagar Mayo, Junio y el presente mes que hoy concluye. = Y, no puedo menos de recordar á V, una vez mas, que en 30 de Set. se vence el primer abono de los $57.000. = Doi á V muchas gracias por haber entregado los 40 ps á mi primo D. José R. Malo. - Pero, no entiendo lo de los cien ps. pa. el viaje de Henderson; porque éste me escribe que, hasta ahora, no há recibido mas que 200, los cuales, si no me equivoco, los adelantó el Sr. Lic. Zavala; pues que los há cargado en su cuenta de Mayo 25, y á mí hijo y a mí la parte correspondiente. = Sirvase V. tener la bondad de ofrecer mis memorias á su estimada Sra. y familia, y de créer que soi de V. muy afecto Amigo, = Angel de Iturbide

¿Adelanta apeo?= He escrito muy de prisa, porque tengo que prepararme para ir, pasado mañana, á pasar con mi familia una semana en Virginia, en casa de dos de mis cuñadas.= Al. De I.

Rosedale = near George Town, D. C. Julio 3st 1870. George F. Henderson Esq. = Mexico. = My dear Henderson. = Yesterday, your favr. of the 10th inst; came to hand with the enclosures to which it refers. = I must hurriedly answer, for the weather is oppressive & must make my preparations tomorrow for my trip the day after with my family on a visit to Madame de Iturbide’s sisters in Va. For that reason I cannot now say any thing in regard to the documents on the legacies; particularly, as they are lengthy & on first inspection a little obscure. = Tell Zavala & Malo that I will answer them in a few days: for the letter I enclose a letter from my Sister. = Through Adams Express your dft. for $200 Gold was presented to me for acceptance, on the 28th; I told the agent that I could not accept till I received your letter of advice; but, it seems that the dft. mas returned to N. York on the 29th, and, as I understand, protested in due form, notwithstanding my urgent request to keep it till the 1st August. - Besides the reason I gave, there was another; it was, that I was afraid that on maturity I would not have in bank the wherewith to meet the drafts = However, on receiving your letter I immediately called at the express & they have promised to send for the draft, - So that your signature shall be honoured & the $200 paid, though I do not know how much the protest may cost, = I can not help objecting to your changing commission, as you do, on the $1.600 which Pedro Elguero received, for, I am certain, that he stood in need of no aid to press the paymt. thereof. - As for the $2000 from Morelia, that sum was negotiated entirely through Benecke. - For the future, I am willing to pay you the 2 ½% commission on the dividends from the $57.000; but, I must insist that they be paid monthly, for, there being so much trouble for $380, there would be much more for $1,140 I, likewise, want punctuality. You say nothing of the $28.500 due on Septr. 30th, See to do it, that Martínez de la Torre o Antonio Escandon ask for that instalment, en tiempo habil y oportuno. = Martinez de la Torre gives me to understand that he was going to charge me with a hundred dollars for your viage to Morelia, which he had given you. - What does he mean? - as I understand it, Zavala advanced the $200 of which you speak, & he has, certainly, charged, in his a/c of May 25th, my son & myself with one third thereof, = Are we - my son & myself - to receive from the $6.000 the $147 due us for a cruel interest? - Count without fail on the payment at maturity of your drafts = In great haste, truly yours = Angel de Iturbide

(In this you are not blameless.) P.D. where is Ignacio Amor? The bill for £429.17.6 was drawn on the 11th & endorsed on the 9th of this month. I hope such a mistake will not cause me trouble. = Al. de I. = I return in a week. = Al. de I. = You much bear in mind the exchange on your draft, which, at 10%, will make $20 more to my credit. = Al. de I.

Rosedale = near George Town, D. C.

August 1st, 1870

Mr. Da Barry = Agent Adams´ Express = George-town, D.C. = Sir: = You can deliver the box I am expecting from N. York either to Mr. George F. or, Mr. O. C. Green; but, to no one else, = Your obedt. Servt.= Angel de Iturbide

Rosedale=near George town, D. C.

August 16th, 1870

Mep. Weston & Gray = N. York. = Dear Sirs: = Absence from the District will, I hope, be my excuse for not having hitherto answered your favour of the 5th instant. = Now, I beg you to acknowledge the receipt of the enclosed draft[[16]](#footnote-15), drawn by Mep. Riggs & Co. On Bank of America & endorsed by me to your order, for $28.78; in payment of mep. Austin Baldwin´s charges are the package by the City of Washington & of your own postage account. = I offer you received thanks & I remain, dear Sirs, your obedt. servt. = Angel de Iturbide

You would oblige me by informing me at what dates the N. York Steamers leave for Vera Cruz; in August & September. = Al. de I.

Rosedale= cerca de George-town, D. C.

agosto 17 de 1870

Sr. Lic. D. R. Martinez de la Torre. = Mexico = Mi muy querido Amigo: = Con el duplicado de su grata carta de 9 del ppdo. Julio hé recibido la 2a. de cambio de la letra de que trata la carta que en 31 del propio mes dirigí á V. y que duplicada vera en éste pliego. = Agradezco ésta nueva atención, repitiéndome suyo muy afecto. Angel de Iturbide

Rosedale = cerca de George-town, D. C.

Agosto 18 de 1870

Sr. D. José R. Malo = México. = Mi muy querido Pepe: = Con atraso recibí tu anterior carta; y ahora, por primera vez, no hé contestado desde luego; porque desde 30 del pasado hallase en mis manos tu grata de 6 del propio mes.- El hecho es que me estaba preparando para pasar unos cuantos días en el estado de Virginia, á unas sesenta millas de aquí, con dos de las hermanas de Alicia, que por aquellos rumbos se encuentran casadas y establecidas.- En efecto estuvimos ausentes cerca de dos semanas; y aunque tratados con la mayor hospitalidad, no nos ha pesado el volver, ya que el calor era igualmente insoportable, ya que, á pesar de lo hermoso de aquellas campiñas, nos veíamos lejos del centro de las noticias que por la guerra en Europa son, actualmente, interesantísimas. = Convengo contigo en que fué util el viaje de Henderson, - La morosidad de Zavala parece inconcebible en éstas regiones. = Sabina há recibido tu última carta y pronto te escribirá; dice que está llena de clacotes ó algo semejante. ¡Pobre!- Te aseguro que con eso de enfermedades, casi continua falta de recursos, y otras cosas aún mas desagradables, hemos sido una familia desgraciada; temiéndome mucho que tales males sigan hasta que acabemos. Por la parte que a mi me toca, te agradezco las gestiones que te tomas la pena de hacer en nuestros negocios, y de veras considero utiles tus servicios en favor de la familia.= Muy buena créo la distribución de los 40 ps., aunque siento la enfermedad y próximo fin de Pusta. = En el pesame que dió Alicia á Concha se hallaba incluso el mio, segun puedes ver si te tomares la molestia de leer la carta; caso de que no la haya roto Concha. = Dice Alicia que te escribo por éste correo.- Saludanos con afecto á todos los pacientes. = Como Siempre tu muy adicto primo, = Angel de Iturbide

Agosto 01.- Hasta ahora no recibo contestacion á la carta que te dirige en Junio 21 va carta de Alicia para ti. = Angel

What about that draff? = Al. de I.

Rosedale = Aug. 19th/70 = To Mr. Da Barry = Adams Express Office = Geo-town, D. C.

Rosedale = near George-town, D. C.

August 19th[[17]](#footnote-16), 1870

Mep Meyer & Geiger = 43 Liberty St = N. York. Box 3258 = Gentlemen: = Wishing to do a favour to Mr. Henderson of Mexico, I am ready to pay, at once his draft on me for two hundred dollars gold, provided you, as the holders of the same, do not wish to render me responsible for the cost of protest. = As I did not accept the draft till the 15th inst. I am certain, that Mr. Henderson would prefer to be advised that his draft has been paid, than so have to wait, nearly a month more, for his money,= Requesting an answer, by, return of mail, I remain, = Gentlemen,= your obedient Servant, = Angel de Iturbide[[18]](#footnote-17)

Rosedale = cerca de George - town, D.C.

Agosto 19 de 1870

Sr. Lic. = D. Luis G. Zavala = Morelía. = Mi estimado Amigo y Sr. = Contesto a su muy apreciable carta de Junio 27 ppdo., de cuyo contenido me hé impuesto detenidamente. = Legado Alsua. - Quedo aguardando saber es resultado que haya dado la como ocasión de los acreedores de D. Octaviano Ortiz; esperando que me arregle V. el pago de los dos mil pesos, sacandolos de la siguiente zafra de Puruarán: ya que, entre tanto, no se obtenga, el arreglo definitivo del legado, por completo, = Por otro lado, quedo enterado de que liquidará V. con el Sr Martinez de la Torre en Oct. ó Nov. la cuenta de sus gastos y honorarios, acordando entonces para ambos legados una iguala equitativa. Y esto me parece muy bien, que se efectue, en cuanto antes. = Legado Huarte.- Diciendo, anticipadamente que, sin insinuarle á V. la culpa, siento mucho que, desde años atrás, no haya V. hecho las averiguaciones que ahora se han conseguido, pasemos al actual estado del negocio, segun lo entiendo. = A D. Mariano Huarte debe V. indicarle, que las consideraciones de parentesco tienen sus limites y que esperamos que, a lo menos, no nos haga mayor malobra en nuestras justas pretensiones con relacion a nuestro legado Alsua. = A D. Carlos Valdovinos debe apremiarsele, por cuantos medios prudentes estén á nuestro alcance, a rendir cuentas y a pagar. = Respecto de Dr. Inocente Sanchez entiendo, que reconoce que nos debe $2,272, de cuya cantidad promete pagar, desde luego, la tercera parte con la venta de mulas; bajo el concepto de que no tengo ningun dato para recordar que es justa la partida de su cuenta de Junio 30 del corriente año, que establece que: "de 1864 a Julio de 1867, se pagó el ½ % mensual son 43 meses é importan $2.150." - ¿A quien pago tal cantidad de $2.150?- Si jamás lo hé sabido, no me acuerdo ahora. = Injusto, asimismo, considero que nos obligue á pagar las contribuciones; mas, sobre tal punto son de agotarse los medios de conciliación. = Pero, ¿cuando pagará los otros dos tercios de la deuda, que confiesa? = Y, ¿de qué modo se ha obtenido la seguridad de que, puntualmente, de pagarán en lo de adelante los réditos? = Hasta Junio 9 de 1856 - si bien tengo presente la fecha - día en que falleció mi hermano D. Salvador, eramos seis los legatarios de dichos réditos de $10.000. = Desde la muerte de mi Sra Madre, acaecida en Marzo 21 de 1861, eramos cinco los legatarios: y, desde la de mi hermano, D. Agustin I., en Dic. 11 de 1866, no somos sino cuatro.- Todo, Según mi interpretacion de la clausula 10a. del testamento de mi tio el Sr. Lic. D. Isidro Huarte. = Aguardo los nuevos informes de V. sobre ambos legados, y aprovecho gustoso la ocasion de repetirme su afmo amigo S. S. q.b.s.m. = Angel de Iturbide

Rosedale = near George - town, D. C.

August 21st, 1870

George F. Henderson Esq. = Mexico. = My dear Henderson: = Having received no letter from you by the English Steamer, I revert to your favour of the 10th ultimo, which I hastily answered on the 31st. = On the 15th instant - the day after my return to the District - I accepted your draft on me for $200 Gold; and, at the same time, sent to the holders in N. York a message to the sume purport as the letter, a copy of which I annex.= Having received no answer to my message & yesterday wrote the letter, and I still hope that you may receive the $200, by this mail. = You have given me a good deal of trouble by not advising me beforehand, that you purpose. to draw upon me; and, you must see that I go a good deal out of my way, in order to do a favour to those whom I consider ready to serve me, in a friendly way. But, I must request you never to draw upon me again, without my express permission. To exact it I believe that I have a perfect right from the fact, that you yourself have acknowledged my good will and liberality to you. - Granting you the 2 1/2% commission for all the sums which you have taken trouble in having had forwarded to me, the account will stand, this, when I have paid the draft.= amount of draft. - $200.00. Exchange at 10%  (low, according to trait d´ Union) 20.00 $220.00 your commission of 2 1/2 % on $5.620.00 - 140.50 Less postage from 14th May last; due me $79.50 = I am really thankful for your services & I appreciate their value; but, I do not see how you can ask a commission on the $1600.00, paid to Elguero, who, I repeat, much have taken the best care to exact that amount. = I Judge that your trip to Morelia has been of much benefit to the Iturbide family as a whole. - To my son & myself it has been of value, in as much as we have thereby obtained a liquidation of the Alsua legacy, with the expectation of receiving $147. - So much for Alsua. = As regards the Huarte legacy, your presence was undoubtedly instrumental in unravelling what the Lic. Zavala should have unravelled long ago; and, I give you all the credit you deserve; not do I say that your remuneration will be excessive. = Frankly, as you desire, I do not think that your return to Morelia, at present, is necessary; though, later I think it may become so. In the meantime, if you keep up your correspondence with Zavala in your leisure moments, I will be thankful, for my part; keeping me advised.= As for Apeo, the sooner an arrangement is made, the better. All you have to do is to keep the Lic. D. Miguel Martínez Steadily to his work. = Read my letter to Zavala: it embodies my actual views on the legacies. = I am sorry you did not find time even to send me the Trait d’ Union by the English Steamer: and, I must reiterate my astonishment on your silence in respect the $28.500 due the 30th proximo.- Hoping that your letter per French Steamer will speak thereon, & advise me that a draft has been sent me for the interests of May, June & July, I anxiously waiting. = Be so good as to deliver the enclosed to Don Pepe Malo. We are all well. - With compliments from Madame de Iturbide & thanks from my boy, I am = a sever = truly yours = Angel de Iturbide

P. S. If I could find a just & honorable purchaser, I would, also, be willing to sell my & my son´s share in Alsua legacy. = Al. de I.

Rosedale= near George-town, D. C.

August 23 rd, 1870

Mep. Meyer & Geiger = 43 Liberty St. = N. York. Box 3258 = Gentlemen. = Being in receipt of your favour of yesterday, I would beg to say in reply; that I am ready to give a cheque, for two hundred dollars Gold, on Mep. Riggs Co. of Washington or this cheque on N. York for the same amount: according to your manner of endorsement of Mr Henderson 's draft on me, and as you may prefer. = As I am doing a favor to that gentleman, I do not wish to pretend to the payment of the protest or any other charges. = I remain, = Gentlemen, = your obedient Servant, = Angel del Iturbide

Rosedale= near George Town, D. C.

August 30th, 1870

Mep. Rich & Irvin Co. = N. York. = Dear Sirs: = I would beg you to be so good as to remit me your gold cheque for my 10-40 Coupons, due the 1st of neat month; after collection thereof. = Truly yours, = Angel de Iturbide

Rosedale = near George-town, D. C.

August 30th, 1870

George F. Henderson Esq. = Mexico. = My dear Henderson = Yesterday, I paid your draft on me for $200 Gold, of July 9th. - In return; your last letter to me was dated July 10th advising me that you had drawn on me: not even the Trait d’ Union have you sent me, - And, of course I have heard nothing about the interests for May, June & July on the $57.000 = Truly Yours = Angel de Iturbide

Do not let Antonio Escandon and Martínez de la Torre forget the $28.500, due on Sept. 30th. = Al. de I.

Rosedale = cerca de George-town, D. C.

Agosto 30 de 1870

Sres J. Rafecas Ha. = Habana. = Muy Sres míos: Teniendo intencion de pasar, dentro de breve tiempo, por la Habana, ruego a V.V. que tengan la bondad de retener en su poder la correspondencia, que para mi les llegare de México. = Mas, si para el 17 del entrante setiembre, no me hubiere presentado en casa de V.V., les pido el favor de seguir mandandome, como hasta aquí, mis sus adictas cartas. = Acompaño una carta para el Sr Henderson; y esperando tener pronto el gusto de Saludar a V.V. me repito su afmo amigo S. S. q.b.s.m. Angel de Iturbide

Rosedale= near George-town, D.C.

August 31th, 1870

Mep. F. Alexandre & Sons = N°83 Broadway = N. York = Gentlemen: = I would beg you to be so good as to advise me, by return of mail, if your steamer “City of Mexico” will sail, without fail, on Saturday, September 10 th, and what is your price for passage to Havana and to Vera cruz. = I remain. = Gentlemen = your obedient servant = Angel de Iturbide

Rosedale = near George-Town, D. C.

September 1st, 1870

Mep. de Iturbide = At Mrs. Turner´s = N. W. Corner of 18th & Pine = Pha = My dear Sabina: = I have determined to embark for Mexico, at N. York, on Saturday the 10th of this month, so that you must have your letter for Pepe Malo- or anything else - ready for next Tuesday or Wednesday; when we will stop in Philadelphia, for no other purpose have to see you. = I again go alone, so that you may imagine, that I am not in the happiest of moods.= acknowledge the receipt of this, at once. = As ever your affectionate brother. = Angel

Rosedale = near George- Town, D. C.

Septr. 1st,1870[[19]](#footnote-18)

Mep. Richd. Irvin Ho. = N. York. = Dear Sirs: If on the receipt of this letter- for which I ask the favour of an acknowledgment - you have already not remitted your cheque for my Coupons, due today, I would beg you to retain the gold; because I purpose going to Your City next week. = Truly yours = Angel de Iturbide

Rosedale = near George-town, D. C.

September 5th, 1870

Mep. Riggs Co. = Washington, D. C. = Dear. Sirs: = Of the gold, which you hold to my credit, I beg you to be so kind as to invest for me three thousand six hundred and fifty dollars Gold ($3.650 Gold), in U. S. 5-20 Bonds of the issue of 1868. = You will sell my gold so soon as the premium reaches 119% & purchase the Bonds, at their market value. But, if gold cannot command one hundred & nineteen per cent, on or before the 19th of this month, then you will sell my gold and purchase U. S. Bonds of the aforesaid class: and the value which gold & Bonds may have, on the said 19th instant. = Requesting to know what, in answer to this letter, your brokerage will be for the above operation I ask of you, as a further favour, to remit me, care of Mep. Weston & Gray, of 64 South Street, N. York, a memorandum of the Bonds, which you may have purchased for me, in pursuance of the above ideas.= I remain, = dear Sirs, = your friend & obedient Servant,=

On a letter from Pepe Malo to Alice, of August 23rd - I say to her "I am too sick to say anything but that we will reach V. Cruz, tomorrow morning about half past seven. - May God grant that I reach Mexico & be able to accomplish the object of this horrid visit Theron, at the earliest opportunity, will be thankfully received by me.= Al. de I.

Hotel del Bazar, = Set. 28-70

Sa D. José R. Malo = México. = Mi muy querido Pepe = Por no tener otra cosa que hacer, te diré, como prueba de mi buena memoria, que á Bourdillon, anoche, le recordé que me estaba debiendo diez pesos; pues, en una comida que nos dio Eustaquia Barron a unos cuantos en Tacubaya, con determinado objeto, se la suplicarte á dicho Bourdillon: que las Estados Unidos no reconocían á Maximiliano. = Bourdillon me dijo que no tenia dinero con que pagar; y asi ha concluido el negocio, = Tuyo como siempre afmo primo Al. de I.

Hotel del Bazar = Set. 28-70

Sr Lic. D. R. Martínez de la Torre = 5 Palma. = Muy querido Amigo mio: = No queriendo detener á V. de la junta que le esperaba, no quiso hacerle la sigte. pregunta. = ¿Qué accion tengo para demandar los $1.900 que de Se me adeudan réditos sobre los $57.000? - Los réditos debieran pagarse, mis por mes, y yá se cumplen cinco, = ¿ A quién los pido? = De V., como siempre, verdadero amigo, Angel de Iturbide

Hotel del Bazar = Sepre. 30 de 1870

Sr D. José de Ansoategui = Presente. = Mi querido Amigo y Sr. = Sin admitir yo otra personalidad que la casa de Antonio Escandon, tenga V. la bondad de decirme cuando puede contar con los $1.900 que se me adeudaron, = ya há visto V. la escritura, y sabe que se me deben cinco meses.= De V. muy afecto amigo. Angel de Iturbide

you have told me, that my letters make no impression upon you, I beg you, however, to read this one more than once. Pepe Malo to offer you, in his name & that of all the parientes their condolence for the death of your mother. = I gave him ten dollars, so that masses might be said for the repose of her soul. = The future of our Agustin will be a bright one, if we do not mar it by our conduct = Al. de I.

My little darling.= Do you not wish, that your Papa was again with your Mamma & with you? = He thinks of you two, all day long & at night,= Do you miss your grandmother? She was so kind to you; but, you always respected her, thank God. I shall her very mide, when I go back to Rosedale. = Good bless you my little song & you Pray for your Papa[[20]](#footnote-19)

México, Nov. 23rd-70[[21]](#footnote-20)

Madame de Iturbide = Rosedale = My dear wife: = I have before me your letter of Oct. 24th, which I would not have answered till the English Steamer but, being afraid that you might find yourself without funds, I now enclose you a letter for Mep. Weston & Gray, requesting them to put at your disposal the sum of one hundred & thirty dollars in Gold, - I left you more than $460 Gold, So that you will have enough with the $130 additional to last, till the end of the year. And, by the English or French Steamer I will send you an orden on Riggs to give you, on the 1st of January, $150 Gold. - I have, never, for one moment, forgotten, that you cannot live without funds to meet your expenses. = In my previous letter, I wrote you, that I was seriously, thinking of your coming to Mexico, But, it is too important matter

México, Octubre 14 de 1870

Sr. Lic. D. Luis G. Zavala = Morelia. = Mi estimado Amigo y Sr = Antes de ahora hubiera acusado á V. recibo de su carta de 15 de Agosto, que intercepte en la Habana el 17 del pasado, pero, estaba aguardando las contestaciones de V. a las ultimas que le dirigieron el Sr. Henderson y me primo D. José R. Malo, pues que prometieron enseñarmelas, = Como no las he visto, suplico a V. que tenga la bondad de decirme, cuando piensa venir á ésta Capital: en anteriores cartas me habia V. asegurado que vendría en Octubre. = Me es grato repetirme de V afmo amigo S. S. q. b. s. m. Angel de Iturbide

México Oct. 15 de 1870

Sres. J. Rafecas Ha. = Habana. = Muy Sres mios: = Tengan V.V. la bondad de dirigirme mis cartas directa y sencillamente á mi nombre, en esta capital. = Con este motivo me es grato repetirme de VV. afmo amigo SS. q. b. s. m.= Angel de Iturbide

Hotel del Bazar Oct. 16 th, 1870

George F. Henderson Esq.= Presente = My dear Henderson = Two days since I wrote you; but, as you did not come to the Hotel, I recalled the letter. = I imagined, that you might be sick or that something had happened to you, = Last evening, however, learning that you were sound & well, I became quieted. = In the midst of my excitement, which can es almost altogether, form my separation from my family, I perceive that I am cooler than you; for, I assure you, one my word of honour, that the remarks - of which you speak - did not allude to you, any more than they did to the Pope of Rome. = If something I have been too frank or brusque with you, it must be attributed to the real friendship I have for you. = Unhappily for myself, when I concert in liking or in friendship, I am easily put out of temper at what, perhaps, with injustice, I consider the want of a proper return: = As I do not know where to find you, you must come & find me. = Sincerely Yours = Angel de Iturbide

I wish this in answer to your letter of today =. Al. de I.

Hotel del Bazar Octubre 23 de 70

Mi querido Pepe: = Hai hombre que sufre mucho: si de veras aprecias el retrato, dime, como quieres que te lo arregle. = Ten fé en tu primo = Angel de Iturbide

Hotel del Bazar México, Oct. 24 - 70

Sr. D. Agustín Noriega (Padre) = Presente. = Mi muy querido Agustín: = Tengo que hacerte una escusa y que hablarte de la pistola. = Te quiere mucho tu primo, Angel de Iturbide.

Si ya estuviera bueno, iria a verle.- Ven a verme, pues tú,

Hotel del Bazar

Mexico, Oct, 29 th, 1870

Madame de Iturbide = Rosedale = My own, my angel wife: = Why did you not keep your promise of writing to me, each week. = If you only Know what torment I suffer from my separation from you & our boy, you would, never, have said a hard word to me, = God has been infinitely kind enormously more than we deserve.= I will let you know in my next letter, whether I ask you to join me here, or, whether ive go to Europe. = I believe you my guardian angel, after hard trials. = Angel de Iturbide

My love to all at Rosedale & in Vd.

To my Son[[22]](#footnote-21) = Do not forget your father, Do pray for him; you stand in need of him.- My boy, my only child, if you do not thank me, I shall be sorry = I give you my blessing; but, ask for us all the blessing of God. Your papa

I send you a couple of little books which must become the guide of your life.

Hotel del Bazar

Febrero 5 de 1871

Sr. D. José R. Malo = 10 de 2a de presente, = México. = Mi querido Pepe: = Ten la bondad de venir me a ver. = Como siempre tu afmo primo, = Angel de Iturbide

Febrero 5 de 1871

Sr. D. Antonio Palomo. = Presente. Mi estimado amigo y Sr. = Tenga V. la bondad de prestarme cinco pesos ($5 c.) . = De V. afecto amigo S. S. q. b. s. m. Angel de Iturbide

Febrero 7 de 1871

Sr Don José Anto. Palomo, = Presente. = Muy Sr. mio: = Tenga V. la bondad de entregar al portador, Manuel Aninzar, la cantidad de cinco pesos ($ 5.00) por mi cuenta. = Repitame su afecto amigo q. b. s. m. Angel de Iturbide

Febrero 9 de 1871

Sr. D. J. Anto. Palomo = Presente. Mi estimado amigo y Sr: = Tenga V. la bondad de mandarme por el portador Manuel Aninzar, la cantidad de sesenta y cinco pesos ($65), á buena cuenta. de V. afmo Amigo S. S. q. b. s. m. Angel de Iturbide

Feb. 10 de 1871

Sr. D. José Anto. Palomo = Presente = tenga V. la bondad de mandarme dos pesos. = de V. afmo Amigo S. S. q. b. s. m. = Angel de Iturbide

Febrero 11 de 1871

Sr. D. José Anto. Palomo Mi estimado amigo y Sr. Tenga V la bondad de mandarme ocho pesos a buena cuenta De V afmo amigo Q S M B Angel de Iturbide

Febrero 12 de 1871

Sr Don José Anto. Polomo, = Presente, Mi muy estimado amigo y Sr. = Tenga V. La bondad de mandarme cenco pesos ($5.c) = De V. afecto amigo S. S. q. b. s. m. = Angel de Iturbide

Hotel del Bazar

Feb. 14 de 1871

Sr. don José Anto. Palomo, = Presente. = Mi estimado amigo y Sr: = Tenga V. la bondad de mandarme diez pesos, (10 ps).= De V. afmo amigo S. S. q. b. s. m. Angel del Iturbide

Hotel del Bazar

Febrero 18 de 1871

Sr. Don José Anto. Palomo. = Presente.- Mi estimado amigo y Sr.- Tenga V la bondad de mandarme diez pesos ($10). De V afmo amigo SS q. b. s. m.

Mexico, Feb. 20th, 1871

Madame de Iturbide, = Vera Cruz = My dear wife: = as soon as you arrive at Vera-Cruz, should you come take great care, that I Know, by telegraph, to this Hotel, the moment you start for Mexico; so that I may meet you on the road, & that you may arrived safely to the side of your devoted husband, = Angel de Iturbide

Mexico Feb 20. de 1871

Sr. D. José Selong = Vera Cruz = Mi estimado amigo y Sr: Como es posible que en el Paquete Ingles lleguen mi esposa e hijo, luego a V tenga la bondad de atender a ellos; ya adelantandoles el dinero que necesitaren, o ya prestandoles sus finos servicios para que comodamente emprendan su marcha para esta capital. Tendrá V la bondad de enviarme un despacho telegrafico en el momento de la llegada del Paquete indicado, avisandome si la Sra. Iturbide Se halla abordo o no, y diciéndome el dia de su salida de Vera Cruz para que inmediatamente me ponga yo en camino para encontrarla, ya sea en Orizaba ú otro punto, segun sean las partes telegraficas que V me remita, los que se servirá V dirigir al Hotel de Bazar. Doy a V anticipadamte. mis gracias por estos servicios, y suplicandole Se Sirva decirme cuales sean los gastos que hube ese erogado en este encargo, a fin de yo le situe Su importe, me repito de V afmo amigo SS. Q b. m Angel de Iturbide.

Adjunto carta para mi Sra Esposa; y, de todos modos que yo sepa si hubiere llegado. For my son. Al. de I.

February 20th, 1871

(Madame de Iturbide = Vera Cruz = My dear wife): = My Sweet boy: = I shall be so glad to see you and your Mother, again; that I will turn almost crazy. = Pray hard to God almighty, that we meet soon = You know how much I love to your Mamma. = Your Papa. Angel de Iturbide

Hotel del Bazar Feb 23 de 1871

Sr. D. J. Antonio Palomo. Presente - Mi estimado amigo y Sr. Tenga V la bondad de mandarme ocho pesos ($8) Su afmo amigo SS q b s m Angel de Iturbide.

Mexico Feb 23 de 1871

Sr. D Gustavo Graverhorst - Morelia Mi muy estimado Sr.

Por instrucciones del Sr D. Angel de Iturbide, que se halla en esta cuidad, me dirijo á V. suplicandole que a la mayor brevedad se sirva informarle el estado que guarda el negocio de la realizacion de los frutos que debia V haber recibido del concurso de D Octaviano Ortiz con el objeto de cubrir los $6,123.38 que alcanzaba la familia del Sr. Iturbide, por réditos vencidos hasta el 19 de Junio del año pasado y de cuya realización. se encargó V en los terminos expresados en el convenio de 9 de Junio ulto.

En carta recibida por el Sr D J Ramon Malo del Sr. Lic.do Zavala, este le dice que solamente aguardaba V algunas cuentas de ventas de ciertos puntos donde se habían remitido los referidos frutos, para presentar la liquidacion respectiva. El Sr Iturbide me encarga recomiende a V la pronta remisión de esta cuenta, avisandole si le será conveniente situarle su importe directamente o autorizandole para que lo gire por conducto de los Sres Lascurain y Co ó Benecke y Co.

Como V comprenderá, por los sucesos acaecidos ultimamente en Francia, donde residía una parte de la familia de los Sres Iturbide, estos se hallarán muy ansiosos de recibir todos los fondos que les pertenezcan, y por este motivo el Sr. D. Angel no duda que tendrá V la bondad de obsequiar sus deseos lo mas pronto que le sea dable.

Soy de V afmo SS. q b s m. George Henderson

Mexico Feb 25 de 1871

Sr D José Ansoategui: Mi estimado amigo: Tenga V la bondad de mandar entregar al Sr. D. J. Antonio Palomo a su orden la cantidad de ciento cincuenta pesos a buena cuenta Repitome, como siempre Su afmo amigo S. S. q b s m Angel de Iturbide

$150

Mexico Feb 25 de 1871[[23]](#footnote-22)

Sr D J. Anto Palomo: Mi estimado amigo Hagame V favor de de mandarme ocho pesos $ 8 Angel de Iturbide

Feb. 28 de 1871

Sr. D. José Anto Palomo = Presente. Mi estimado Amigo y Sr. = Tenga V. la bondad de mandarme por el portador, Manuel Aninzar, en cantidad de diez pesos ($10.) a buena cuenta. De V. afmo Amigo = S. S. q. b. s. m. Angel de Iturbide

Marzo 2 de 1871

Sr. D. José Anto. Palomo = Presente. = Mi estimado amigo y Sr. = Tenga V. la bondad de mandarme por el portador. Manuel Aninzar, la cantidad de ocho ps. ($8c), a buena cuenta. = De V. afmo amigo S. S. q. b. s. m. Angel de Iturbide

Marzo 4 de 1871

Sr. D. J. Anto. Palomo. Mi muy estimado amigo y Sr. Hagame V el favor de mandarme ocho pesos Suyo afmo. $8. Angel de Iturbide

Marzo 4 de 1871[[24]](#footnote-23)

Sres. Viya Hermanos, Sucesores. Vera Cruz - Escriban a J Rafecas Y Co Habana que pongan telegrama a Weston & Gray, New York, para que estos digan a mi esposa venga inmediatamente a Mexico y le proporcionen los fondos. = Contesten Vdes.

Marzo 4 de 1871

Sr. D. J Anto Palomo: Mi muy estimado amigo.

Sirvase V mandarme con el portador seis pesos - Suyo afmo Angel de Iturbide

(Telego.) $10

Marzo 6 de 1871

Recibi del Sr Don Anto. Palomo La cantidad de cinco pesos ($5), á cuenta de mayor cantidad que me debe. = Angel de Iturbide

Hotel del Bazar Marzo 8 de 1871

Sr. D. Antonio Escandon. Presente. = Tenga V. la bondad de mandarme treinta pesos ($30), a buena cuenta. = Soi de V. afmo amigo Sr. Palomo. S. S. q. b. s. m. Angel de Iturbide

Vale por cino pesos Angel de Iturbide $5

Marzo 12 de 1871.

Marzo 14 de 1871

Sr. Don José Anto. Palomo = Mi estimado y Sr. = Este papel vale por cinco pesos, Angel de Iturbide

($5.)

Mexico Marzo 23 de 1871

Sr. D José de Ansoategui

Mi estimado amigo

Sirvase V mandar en entregar al portador la cantidad de cien pesos por mi cuenta. De V afmo Angel de Iturbide

$100.

M.

Mi estimado amigo y Sr este papel vale por cinco pesos ($ 5c) = Angel de Iturbide

Mexico Marzo 30 de 1871

Sr Torre Fischer Co: Vera Cruz - Muy Srs. mios, Acuso a Vdes. recibo de su apreciable del 24 del corriente con los documentos inclusos que son el conocimiento y copia de guia de A. de I. 1/4 - 4 bultos equipaje y maquina de coser que me remitieron con los carros acelerados de Masarraza y Co y una libranza de $183.75 a cargo de estos Sres. Martin Daran y Co. cuyo importe me fue entregado en el acto de presentacion

Ahora tengo que suplicar a Vdes. Se sirvan enviarme, lo mas pronto posible, los dos bultos que, desde el mes de Septiembre ppdo.. dejé en poder de los Sres. J. Selong y Co. girando a mi cargo los gastos que hayan erogado

Doy a Vdes mismas espresivas gracias por las finas atenciones que se sirvieron prodigos a la Sra Iturbide y mi hijo: y me ofrezco a su disposicion como su afmo amigo y afo SS QBSm Angel de Iturbide

C. de V. = abril 20 de 1871

Sr Don M José de Ansoategui N. 3 Calle de Tiburcio

Mí estimado amigo y Sr: = Tenga V. la bondad de mandar entregar a los Sres Rigal y Masson o á su orden la cantidad de dos cientos y trece pesos ($213) cargandola en cuenta a = su afmo amigo S. S. q. b. s. m. = Angel de Iturbide

C. de V. = abril 25 de 1871

Mi estimado amigo y Srs: = Suplico a V. que tenga la bondad de entregar á la orden de Don Juan Bourge la cantidad de ciento treinta y cinco pesos y setenta y dos centavos ($135.72) cargandola en cuenta a su afmo amigo S. S. q. b. s. m. = Angel de Iturbide

Sr don José de Ansoategui = N° 3 Calle de Tiburcio.

C. de V. = Abril 26 de 1871

Mi estimado amigo y Sr. = Suplico a V. que tenga la bondad de entregar á la orden de M. Croisé la cantidad de tres cientos cuatro pesos, setenta y cinco centavos ($304.75cs), cargandola en cuentra a = Su afmo amigo S.S. q.b.s.m. Angel de Iturbide

Sr Don José de Ansoategui = N°. 3 Calle de Tiburcio

C. de V. = Abril 26 de 1871

Mi estimado amigo y Sr: = Sirvase V. mandarme la cantidad de cincuenta pesos, cargandola en cuenta a su afmo, y amigo S.S. q. b. s. m. Angel de Iturbide

Sr Don José de Ansoategui, Calle de Tiburcio, No. 3

C. de V. = Abril 30 de 1871

(Sr. Don José de Ansoategui)

Mi estimado amigo y Sr: = Tenga V. la bondad de mandarme, por el portador (a buena cuenta), la cantidad de cien pesos (100 ps), cargandolas en cuenta a su afmo amigo S. S. q. b. s. m. Sr Don José de Ansoategui = Calle de Tiburcio N.° 3

C. de V. = Mayo 3 de 1871

Mi estimado Amigo y Sr: = Tenga V. la bondado de mandarme, por el portador, la cantidad de dos cientos pesos (200 ps.), cargandola en cuenta a su = afmo amigo S. S. = q. b. s. m. = Angel de Iturbide

Sr. Don José de Ansoategui = Calle de Tiburcio, Nº 3.

N. 33. La mandé por el portero Juan Perez

C. de V. = Mayo 6 de 1871

Mi estimado Amigo y Sr. = Tenga V. la bondad de entregar a la orden de los Sres Walker Herms. Sucesores la cantidad de cincuenta y cuatro pesos, cincuenta centavos (54 ps. 50 cs), cargandola en cuenta a = su afmo amigo S.S.q.b.s.m. Angel de Iturbide

Sr Don José de Ansoategui = Calle de Tiburcio, Nº3

Mi estimado amigo y Sr: Tenga V. la bondad de entregar a la orden del Sr Don José Anto. Palomo la cantidad de sesenta y cinco pesos y quince centavos (65 15 cs) cargandola en cuenta a su afmo amigo S.S. q. b. s. m. (firmado) Angel de Iturbide. Sr. Don José de Ansoategui = Calle de Tiburcio Nº 3

C. de V. Mayo 6 de 1871.

Mi estimado amigo y Sr. Tenga V. la bondad de entregar a la orden del Sr Doctor Don Juan Velasco la cantidad de cincuenta pesos ($50.), cargandola en cuenta a su afmo amigo S. S. q. b. s. m. (Firmado) Angel de Iturbide

Sr Don José de Ansoategui = Calle de Tiburcio N°. 3.

C. de V. = Mayo 8 de 1871

Mi estimado amigo y Sr. = Tenga V. la bondad de pagar a la orden de la Sra Doña Clara Villamil la cantidad de Setenta pesos (70 ps), cargandola en cuenta a su afmo amigo = S. S. q. b. s. m. Angel de Iturbide

Sr Don José de Ansoategui = Calle de Tiburcio, Nº. 3

Mexico Mayo 16 de 1871

Sr. D. José de Ansoategui

Mi estimado amigo y Sr.

Sirvase V. mandar entregar al portador la cantidad de Seiscientos cincuenta y siete pesos, sesenta centavos, por saldo de réditos que Se me deben hasta el 30 de Abril ppdo. De V afmo amigo S.S. q b s m Angel de Iturbide

$ 657. 60. La lleva Henderon.

He Recibido del Sn. D. José de Ansoategui, como Apoderado del Sn D Ignacio Amor, la cantidad de Trescientos ochenta pesos por un mes de réditos cumplido en la fecha por el capital de $57.000 que al 8% anual, reconoce sobre la Hacda. de San. Gabriel, distrito de Tetecala, a mi favor, como Albacea de mi finado hermano D. Agustin G de Iturbide, y padre y curador de mi hijo, el menor D Agustin de Iturbide y Green

$380[[25]](#footnote-24)

Mexico Mayo 31 de 1871

Hé recibido del Sr. D José de Ansoategui como Apoderado del Sr. D. Ignacio Amor, la cantidad de Mil novecientos pesos por cinco meses de réditos corridos de 30 de Noviembre del año pasado hasta 30 de Abril ultimo, por el capital de $57,000 que al 8% anual, reconoce sobre la Hacienda de San Gabriel, distrito de Tetecala; a mi favor, como Albacea de mi finado hermano. D. Agustin G de Iturbide y padre y curador de mi hijo, el menor D. Agustin de Iturbide y Green México Mayo 16 de 1871 A. de I. $ 1900

Mexico Junio 13 de 1871

N. 4418

Banco de Londres, Mexico y Sud America. London Bank of Mexico & South America, Limiten Paquete al portador Doscientos, ochenta pesos. A. de I. $280.

He recibido del Sn. D José de Ansoategui como apoderado del Sn. D. Ignacio Amor la cantidad de Trescientos ochenta pesos por un mes de réditos cumplido en la fecha por el capital de $57000 que al 8% reconoce sobre la Hacda. de San Gabriel distrito de Tetecala, a mi favor como Albacea de mi finado hermano D. Agustin G de Iturbide y padre y curador de mi hijo, el menor D. Agustin Iturbide y Green $380

Mexico Junio 30 de 1871

A. de I.

Mexico Julio 3 de 1871

Sres. J. Rafecas y Co.

Habana.

Muy Srs mios y amigos:

Sirvanse Vdes tener la bondad de remitirme por la primera ocasion, dos mil tabacos de Cabañas y Carbajal, es decir: Mil Damas, quinientos Londres y quinientos Regalias pequeños. De la misma Fabrica, se servirán Vdes enviarme cuatro rollos de cigarros de papel ni muy gruesos, ni muy finos. Pueden venir consignados a los Sres Torre Fischer H. de Vera Cruz. por mi cuenta, avisandome Vdes su costo para situarles el importe. Anticipando a Vdes mis gracias. me repito de V afmo amigo SS. Q B. S. M. A de I

Mexico July 19th. 1871

O. C. Green Esq. Georgetown. D.C.

My dear Zola.

Enclosed please find two orders of mine.- One for the, National safe Deposit Company at Washington, & the other for Mep.ss Riggs & Co of the same city.

The object of these orders is to permit you to cut off the Coupons on the United States Bonds (or Consols) belonging to me & now in the possession of these parties. In the National Safe Deposit Co, I have the sum total of $11,000 say Eleven thousand dollars as appears by the Six certificates of deposit in my hands and of which I hand you a note. In the house of Mep.ss. Riggs & Co. I have the sum of $3700. Three thousand seven hundred dollars. Vfs 5/20 Coupon Bonds of 1868. as per their letter of advice to me of 20th Sept. 1870.

You will do me the favor after returning the Coupons, to recover the interest due upon them, and after returning the sum of $500 (Five hundred dollars) you will please invest the remaining balance in the same Stock (and) using your own judgement as to whether they should be in 5/20 or 10/40 or between the two. The Bonds themselves are again to be respectively deposited in the National Safe Deposit Co. in my name, taking care that Mep.ss. Riggs Co, also deposit the $3,700 in the same establishment, remitting me the corresponding Certificate, also in my name.

(Mrs. Iturbide wri) Alice writes to you by this opportunity regarding the purchase of a piano &, which she wishes you to send out to her here.. Write me, by an early opportunity you, Believe me to be affectionately Yours

Mexico July 19th. 1871

To the Secretary of the National Safe Deposit Company - Washington DC.

Dear Sir

I hereby authorize you to permit Mr. O. C. Green to cut off the Coupons already due on the U S Consols belonging to me and deposited with you, as appears by the Certificates in my possession, of which the following is a list:

1026 August 3rd 1867. $2350

1091 April 30th 1869. 3500

1230. August 4th 1869. 1150

1373. January 18th. 1870. 2000

1379 January 28th 1870 1000

1548. August 1st 1870. 1000

Say six certificates $11000

of the total value of Eleven Thousand dollars On retiring the Coupons, the Consols themselves will (be again) remain deposited with you by Mr Green in my name. I have also given instructions to Mep. Riggs & Co. of yours city to place in deposit a further sum of $3700. say Three thousand seven hundred dollars in 5/20 Bonds of which they will also take a certificate likewise in my name.

I remain, Dear Sir

Your friend ob. Servs.

Mexico July 19. 1871

Mep Riggs & Co. Washington D.C. Dear Sirs

Under this date I write to Mr. O. C. Green, requesting him to apply to you for the Coupons now due on the U. S. 5/20 Bonds for $3700 which you purchased for me according to your favor of 20th. Sept. last year. Mr. Green will recover the interest on these coupons, and I shall feel obliged to you if you will kindly deposit the Bonds themselves with the National Deposit Company at Washington, using your judgment as to in my name, retaining in your possession or remitting to me the corresponding certificate.

I remain. Dear Sirs- Yours truly

Hé recibido del Sr. D José de Ansoategui. como Apoderado del Sr. D Ignacio Amor. La cantidad de Trescientos ochenta pesos, por un mes de réditos, cumplido en la fecha, por el Capital de $57,000 que al 8% reconoce sobre la Hacienda de San Gabriel, distrito de Tetecala, a mi favor, como albacea de mi finado hermano D. Agustín G de Iturbe de y padre y curador de mi hijo D Agustin G de Iturbide y Green

$380.

Mexico Julio 31 de 1871

He recibido del Sn D José de Ansoategui como Apoderado del Sn D Ignacio Amor, la cantidad de Trescientos ochenta pesos, por un mes de réditos, cumplido en la fecha, por el capital de $57,000, que al 8 por ciento reconoce sobre la Hacienda de San Gabriel distrito de Tetecala, a mi favor, como Albacea de mi finado hermano D. Agustin G de Iturbide, y padre y Curador de mi hijo D. Agustin Iturbide y Green.

$380.

Mexico Agosto 31 de 1871

Mexico Sep. 9 de 1871 = Sr. D. V. Marcó del Pont = Paris = mi estimado amigo y Sr. Oportunamente recibí la muy atenta de V. del 26 de Julio pp.o en que tuvo V. la bondad de acompañarme un extracto de la cuenta que ha llevado con la testamentaria de mi finado hermano D. Agustin G. de Iturbide, mostrando un sueldo a favor de acta Testamentaria en 31 de Diciembre de 1870 de francos 16184.45 diez y seis mil, ciento ochenta y cuatro francos 45 céntimos. Examinada la referida cuenta, tengo que manifestar a V. mi entera conformidad con el mencionado Saldo, como primera partida en cuenta nueva por el 1o de Enero del año que cursa.

Reciba V. mis expresitas gracias, por esta nueva atencion, y deseando se conserve V. con perfecta salud, me repito en afmo amigo y S.S. Q. S. M. B. (firmado) Angel de Iturbide

Mexico Sept. 19 1870

Mep.ss. Richd. Irvin & Co.

New York

Gentlemen

Your esteemed favor of the 19th October of last year came duly to hand, and with reference to my Bonds, deposited in Your hands, I have now to request, that, if you have not already done so, you will do me the favor to recover the amount of the two. half - yearly coupons due in March last and the present month, sending me by return Steamer a statement of my account with you

I remain, Gentlemen

Your obed. Serv

(Signed) Angel de Iturbide

He recibido del Sr. D José de Ansoategui como Apoderado del Sr. D Ignacio Amor, la cantidad de Trescientos ochenta pesos, por un mes de réditos, cumplido en la fecha, por el capital de $57,000 que al 8 por ciento, reconoce sobre la hacienda de San Gabriel, distrito de Tetecala, a mi favor, como Albacea de mi finado hermano, D Agustin G de Iturbide, y padre y curador de mi hijo D. Agustin Iturbide y Green.

$380

Mexico Set. 30 de 1871

Mexico Oct. 17 de 1871

Sr D Luis G Zavala - Morelia - Muy Sr nuestro:

Hemos de merecer a V que tenga en su poder de la pertenencia de los herederos del é S. D. Agustin de Iturbide, se sirva poner a la disposición de este Sr. Lic. D. Miguel Martinez la cantidad de Ciento seis pesos 75 centavos, cuya suma se le debe por saldo de una cuenta de honorarios por su informe sobre el negocio de la Hacienda de Apeo.

Souve, de V al S.S. q b s m

$106.75

Sr. D. José de Ansoategui

Tiburcio N°. 3

C. de V.

Octubre - 20 de 1871

Mi estimado amigo y Sr. Ruego a V. que tenga la bondad de mandarme la cantidad de cien pesos ($100c) cargandola en cuentra a su afmo Amigo S. S. q. b. s. m.

(Firmado) Angel de Iturbide

Sr. D. José de Ansoategui

Tiburcio Nº. 3

C. de V. = Octubre 30 de 1871

Mi estimado Amigo y Sr. Ruega a V. que tenga la bondad de pagar, a la orden de Don Gregorio Garrido la cantidad de cuarenta y cinco pesos (45 ps); cargandola en cuenta, a su afmo amigo S. S. q. b. s. m (Firmado) Angel de Iturbide

C. de V. Octubre 31 de 1871

Mi estimado amigo y Sr: = Suplico a V. que tenga la bondad de remitirme por el portador, - la cantidad de ciento treinta y cinco pesos (135 ps); cargandomela en cuenta.

Repitome de V. con gusto, Su afmo Amigo S. S. q. b. s. m.

(Firmado) Angel de Iturbide

Sr. D. José de Ansoategui, N°. 3 de Tiburcio

C. de V. = Noviembre 16 de 1871

Mi estimado amigo y Sr: = Sírvase V. tener la bondad de remitirme, por el portador, Placido Pardenas, la cantidad cien pesos ($100 ps). Cargandola en cuenta a = este su afmo Amigo S. S. q. b. s. m. = Angel de Iturbide

Sr. D. José de Ansoategui = N°. 3 de Tiburcio

Mexico Nov. 18th 1871[[26]](#footnote-25)

Mep. Richd. Irvin & Co = New York. = Gentlemen: Answering your form of the 19th[[27]](#footnote-26) ultimo with statement of the same date of my coupons, I would beg you to be so kind as to invest for me the $746,25 gold, to which they refer, in the same class of U.S. Bonds; that is in the 10/40. Begging for an early answer, I remain, dear Sirs, your obliged & obdt. servant = (signed) Angel de Iturbide.

He recibido del Sr. D. José de Ansoategui, como apoderado del Sr. D. Ignacio Amor, la cantidad de tres cientos ochenta pesos, por un mes de réditos, cumplidos en la fecha por el capital de $57.000 que al 8 por ciento reconoce sobre la hacienda de San Gabriel. distrito de Tetecala, a mi favor, como albacea de mi finado hermano D. Agustin G. de Iturbide y padre y curador de mi hijo D. Agustin de Iturbide Mexico Oct. 31 de 1871

$380

(Signed) Angel de Iturbide

He recibido del Sr D José de Ansoategui, como apoderado del Sr. Don Ignacio Amor. la cantidad de trescientos ochenta pesos, por un mes de réditos, cumplidos en la fecha, por el capital de $57,000 que al 8 por ciento reconoce sobre la hacienda de San Gabriel, distrito de Tetecala, a mi favor, como Albacea de mi finado hermano D. Agustin G. de Iturbide y padre y curador de mi hijo D. Agustin de Iturbide. Mexico, Nov. 30 de 1871.

$380

(Signed) Angel de Iturbide

C. de V. Mexico, Dec. 22 de 71[[28]](#footnote-27) = Sr Lic. D. Luis G. Zavala = Morelia = mi muy estimado amigo y Sr. = Tengo una deuda muy urgente que debo cubrirlo lo mas pronto posible, - a lo mucho tardar, en cuatro semanas. Por lo mismo, ruego a V. tenga la bondad de decirme cuando podre contar con la cantidad de quinientos pesos (500 p.s) que debera cargarse en cuenta a mis legados Alsua y Huarte, por los intereses. En espera de la pronta contestacion de V. y con la certeza de que será favorable me repito su afmo amigo S. S. q. s. m. b. (firmado) Angel de Iturbide

He recibido del Sr. D. José de Ansoategui como apoderado del Sr. D. Ignacio Amor, la cantidad de Trescientos ochenta pesos por un mes de réditos cumplido en la fecha por el capital de $57.000 que al 8% anual, reconoce sobre la Hacda. de San Gabriel, distrito de Tetecala, a mi favor, como Albacea de mi finado hermano D. Agustin G de Iturbide y padre y curador de mi hijo, el menor D. Agustin de Iturbide

$380

Mexico, Diciembre 31 de 1871 (firmado) Angel de Iturbide.

1872

Mexico Jan 17th, 1872

Mep. Rich C Irvin & Co = N. York = Dear Sirs. = Your esteemed favr. of the 8th ultimo - with statements attached - reached me too late to be answered by a previous steamer. = Thanking you now for your trouble, I shall probably write to you, Crying in a few days. = I remain, dear Sirs, = your obliged & obedt. Servant. (Signed) Angel de Iturbide

He recibido del Sr. D. José de Ansoategui, como apoderado del Sr D. Ignacio Amor, la cantidad de trescientos ochenta pesos por un mes de réditos cumplido en la fecha por el capital de $57,000 que al 8% anual, reconoce sobre la Hacienda de San Gabriel, distrito de Tetecala, a mi favor, como Albacea de mi finado hermano, D. Agustin G. de Iturbide, y padre y curador de mi hijo, el menor D. Agustin de Itrubide $380 Mexico, Enero. 31 de 1872 (firmado) Angel de Iturbide.

Mexico, Feb 6th. 1872 = My dear Zola: I hereby authorize you to withdraw firm the Natl. Safe Deposit Co. at Washington the coupons, due on my U.S. Bonds up to January 1st 1872 = inclusively. This done you will is to kind as to invest in my name that amount in $10-40.0 advising me that you have have as My love & all I shall write to you again by nest Steamer Most affectionately your mother (signed) Angel de Iturbide

He recibido del Sr. D. José de Ansoategui como apoderado del Sr. D. Ignacio Amor, la cantidad de trescientos ochenta pesos, por un mes de réditos, cumplidos en la fecha, por el capital de $57.000 que al 8 por ciento, reconoce sobre la hacienda de San Gabriel, distrito de Tetecala, a mi favor, como Albacea de mi finado hermano Don Agustin G. de Iturbide, y padre y curador de mi hijo D. Agustin de Iturbide $380, Mexico Febrero 29 de 1872 (firmado) Angel de Iturbide

Mexico, Jan[[29]](#footnote-28), 17th., 1872 Mep. Richd. Irvin & Co = N. York. Dear Sirs: = I last wrote on Jan 17th, in answer to your favr. of the 8th of Dec. = Now, I beg you to be so kind as to invest the interest of the 10-40´s U. S. Bonds. which you hold for me - In the saw class of securities; advising me of the result, by the earliest opportunity, per steamer; direct or via Havana, = I am, = dear Sirs, = your obliged & obedt. servt. =(Signed) - Angel de Iturbide

He recibido del Sr. D. José de Ansoategui, como apoderado del Sr. D. Ignacio Amor, la cantidad de trescientos ochenta pesos, por un mes de réditos, cumplidos en la fecha, por el capital de $57.000 que al 8 por ciento, reconoce sobre la Hacienda de San Gabriel, distrito de Tetecala, a mi favor como Albacea de mi finado hermano D. Agustin G de Iturbide y padre y curador de mi hijo D. Agustin de Iturbide.

$380

Mexico, Marzo, 31 de 1872 (firmado) Angel de Iturbide

Mexico, April 14/72

Sres J. Rafecas & Co. Havana. Muy estimados Sres mios; Ruego a V.V. que tengan la bondad de remitirme, consignandolos a los Sres Fischer Torre & Co de Vera Cruz, los siguientes tabacos Habanos, todos de la fabrica de la Viuda de Carvajal (ya conoce V. la casa de que quiero hablar): Una caja de cien - Regalia Cuatro cajas de cien - Londres. Cuatro cajas de cien - Damas Una caja de cien - á pusta de V.V. Total mil tabacos = Haganme V.V. el favor de contestarme directamente y de escusar esta nueva molestia de su afmo amigo S.S. q. b. s. m. (firmado) Angel de Iturbide = Los Sres Ficher Torre & Co y, su suplica de V.V. deberan de escribirme, cuando me remitan los antedichos tabacos = Al. de I.

He recibido del Sr D. José de Ansoategui como apoderado del Sr D. Ignacio Amor la cantidad de trescientos ochenta, pesos, por un mes de réditos, cumplido en la fecha, por el capital de $57.000, que al 8 por ciento reconoce sobre la Hacienda de San Gabriel distrito de Tetecala, a mi favor, como Albacea de mi finado hermano D. Agustin G. de Iturbide, y padre y curador de mi hijo D. Agustin de Iturbide - Mexico Abril 30 de 1872 (firmado) Angel de Iturbide

Hunador de la Alameda

Nº 4 = May 17th, 1872

My dear Sir: = I imagine, what I have explained to you the right which I consider that I hold in regard to the transit may on the Isthmus of Tehuantepec; as also my younger brother = would your not turn, in a few written words, let me know what I may hope far form the Company of which you are. The President. = So far as I have been enabled to understand it, my rights are equal to those of Don Manuel Pagno = I have the honour to be Sir,= your friend & obedt. servant. = Angel de Iturbide

Simon Stevens Esq,= Hotel de Iturbide.

Mexico, Mayo 20 de 1872 - Sres Fischer Torre & Co. Muy Sres mios: Con fecha 11 de corriente mes me comunican los Sres J. Rafecas & Co de la Havana que habian consignado a V.V. un cajon conteniendo mil tabacos de diferentes tamaños. = Y como V.V. nada me escriben sobre el particular tengo que rogarles que tengan la bondad de remitirmelas sin demora, contestando esta carta por meta de correo: = me repito de V.V. afmo amigo y atento servidor q. s. m. b. (firmado) Angel de Iturbide

He recibido de Sr. D. José de Ansoategui, como apoderado del Sr. D. Ignacio Amor la cantidad de trescientos ochenta pesos por un mes de réditos, cumplidos en la fecha, por el capital de $57000, que el 8 por ciento reconoce sobre la hacienda de San Gabriel, Distrito de Tetecala, a mi favor, como Albacea, de mi finado hermano D. Agustin G. de Iturbide y curador de mi hijo, D. Agustin de Iturbide. Mexico, Mayo 31 de 1872. (firmado) Angel de Iturbide

Mexico, June 6th. 1872 = My dear Mr. Heamer, After your departure from this city, I have been informed that Mr Pagno interests as regards the transit on Tehuantepec have been arranged favourably & hum = As Mr. de Iturbide holds rights as good as those of Mr Pagno, I beg that you as act, that the interests that my husband represents, be placed, on at least as good and valuable a forting, as those of that gentleman, and thus I can avoid the step that you advise, of consulting a lawyer at N. Yorle = offering them on you safe arrival to N.Y. you will visit but I remain - Very truly yours- Alice G. de Iturbide

Mexico June 27 - 72 = Dear Sirs: Be so good as to pay to the order of Mep. Miller & Co N° 3 Union Square of your City the sum of twelve dollars; charging the same to my account I remain = dear Sirs = Your friend & obedt. Servant. (Signed) Angel de Iturbide

He recibido del Sr Don José de Ansoategui, como apoderado del Sr. D. Ignacio Amor la cantidad de tres cientos ochenta pesos, por un mes de réditos, cumplidos en la fecha, por el capital de $57000, que al 8 por ciento reconocer sobre la Hacienda de San Gabriel, distrito de Tetecala, a mi favor, como Albacea de mi finado hermano D. Agustin G. de Iturbide, y padre y curador de mi hijo D. Agustin de Iturbide $380

Mexico, Junio de 1872 (firmado) Angel de Iturbide

Mexico, Sep. 28th 1870 Mep Rich & Irvin Co. N. Y. Dear Sir = I beg you to wrote with great can, what I now say = In case of my death, you will not, deliver my 10-40 bonds, which you kind y hold for me to safe keeping to anyone except my executor or executors or the person, duly authorized by him in them to receive them = Be so kind as to answer this letter by original and duplicate; direct through Steamer from your city, to Vera Cruz, and, by Steamer, to Havana, care of Mep. J. Rafecas & Co. of Havana: = Direct, you will direct to my address to my own name, merely = truly yours (signed) Angel de Iturbide. I have write send a report of certain case mines which have been lately observed in the hand of Guerrero of this republic, = would you take the humble & inform me, is anything can be done, in pursuance of the ideas which you will find at the end of the refund = Your answer them, at the inherits opportunely; will be thankfully received by me = signed A. de I.

Como albacea de mi esposo D. Angel de Iturbide, segun el testamento otorgado á cuatro de Junio de mil ochocientos setenta y uno ante el Notario D. Ignacio Burgoa, y como representante de mi hijo el menor D. Agustin de Iturbide, he recibido del Sr. D. José de Ansoategui la cantidad de tres cientos, ochenta pesos por réditos del Capital de $57.000 mil pesos que reconoce sobre la Hacienda de San Gabriel, el Sr Don Ignacio Amor. Alicia G. de Iturbide $380

Mexico Julio 31 de 1872

Mep. Rich Irvin & Co. New York. Mexico August 14th 1872 = My dear sirs, My husband D. Angel de Iturbide died in the 21st of July, and as his Executory, I would beg you to be so kind as to draw the interest in the U. S. Bonds that you hold in his name, and fund of invest it in the same, Bonds or any others, you may think better. I would also beg you to send me a statement of all you have in your hands belonging to Mr de Iturbide I have just received the receipt of the Borts you so kindly send in your letter & Mr. de Iturbide of July 17th = I am, dear Sirs = Very truly yours -Alice G. de Iturbide On the 14th of August I wrote to Sr. Edward Peace = obirtual. St. Phil. Begging him to deliver a letter from P. Malo to Salvador and at the same time telling him of Iturbide´s death - A. G. de I.

Mexico, Aug. 26th/72 = Mep. Riggs & Co. = Washington, D.C. = Gentlemen: As executing to my late husband Angel de Iturbide, I have under date of 23°. inst. drawn on you for $4.01 gold, (four hundred & one dollars gold) to the order of Mep. A. Wagner & Levien, I remain, = Gentlemen, = Very truly yours, Alice G. de Iturbide.

Como albacea, de mi esposo, D. Angel de Iturbide, segun el testamento otorgado á cuatro de Junio de mil ochocientos setenta y uno, ante el Notario D. Ignacio Burgoa, y como representante de mi hijo el menor D. Agustin de Iturbide, he recibido de Sr Don José de Ansoategui la cantidad de trescientos ochenta pesos, por réditos del Capital de $57000 que reconoce sobre la Hacienda de San Isabel, el Sr Don Ignacio Amor. $380

Alice G. de Iturbide = Mexico, Agosto 31 de 1872

Como Albacea de mi esposo D. Angel de Iturbide, según el testamento otorgado a cuatro de Junio de mil ochocientos setenta y uno, ante el Notario D. Ignacio Burgoa, y como representante de mi hijo el menor D. Agustin de Iturbide, he recibido del Sr. D. José de Ansoategui la cantidad de trescientos ochenta pesos, por réditos del Capital de $57000 que reconoce sobre la Hacienda de San Gabriel, el Sr. Don Ignacio Amor. $380

Alice G. de Iturbide = Mexico, Set. 30 de 1872.

Como Albacea de su esposo D. Angel de Iturbide, segun el testamento otorgado a cuatro de Junio de mil ochocientos setenta y uno, ante el notario D. Ignacio Burgoa, y como representante de mi hijo, el menor D. Agustin de Iturbide, he recibido del Sr. Don José de Ansoategui la cantidad de trescientos ochenta pesos, por réditos del Capital de $57.000 que reconoce sobre la hacienda de San Gabriel, el Sr. D. Ignacio Amor. $380.

Alice G. de Iturbide Mexico, Octubre 31 de 1872

Como Albacea de mi esposo don Angel de Iturbide, segun el testamento otorgado a cuatro de Junio de mil ocho cientos setenta y uno, ante el notario D. Ignacio Burgoa, y como representante de mi hijo el menor D. Agustin de Iturbide, he recibido del Sr D. José de Ansoategui, la cantidad de trescientos ochenta pesos, por réditos del Capital de $57000, que reconoce sobre la hacienda de San Gabriel, el Sr. don Ignacio Amor $380

Alice G. de Iturbide Mexico, noviembre 30 de 1872

Como Albacea de mi esposo D. Angel de Iturbide, segun el testamento otorgado a cuatro de Junio de mil ochocientos setenta y uno, ante el notario don Ignacio Burgoa, y como representante de mi hijo el menor Don Agustin de Iturbide, he recibido del Sr Don José de Ansoategui, la cantidad de trescientos ochenta pesos, por réditos del Capital de $57000, que reconoce sobre la hacienda de San Gabriel, el Sr. Don Ignacio Amor = Alice G. de Iturbide Mexico. Diciembre 31 de 1872

Como Albacea de mi esposo D. Angel de Iturbide, según el testamento otorgado a cuatro de Junio de mil ochocientos setenta y uno, ante el notario Don Ignacio Burgoa, y como representante de mi hijo, el menor D. Agustin de Iturbide, he recibido del Sr Don José de Ansoategui, la cantidad de trescientos ochenta pesos, por réditos del Capital de $57000, que reconoce sobre la hacienda de S. Gabriel el Sr. D. Ignacio Amor. $380 Alice G. de Iturbide Mexico Enero 31 de 1873

Como Albacea de mi esposo Don Angel de Iturbide, segun el testamento otorgado a cuatro de Junio de mil ochocientos setenta y uno, ante el notario don Ignacio Burgoa y como representante de mi hijo, el menor Don Agustin de Iturbide, he recibido de Sr Don José de Ansoategui la cantidad de trescientos ochenta pesos, por réditos del Capital de $57000 que reconoce sobre la hacienda de San Gabriel, el Sr Don Ignacio Amor $380 Alice G. de Iturbide Mexico Febrero 28 de 1873

Mi querido Salvador. Siento muchisimo no poder mandarte el dinero que necesitas. Nuestras ventas son tan limitadas, que apesar de una, economia grande no he podido todavia pagar las deudas que ha dejado mi marido - Muchas felicitaciones y mejor suerte te desea, tu tía. Alicia G. de Iturbide - (Contestar una carta de Salvador pidiendo dinero).

Como Albacea de mi esposo Don Angel de Iturbide, segun el testamento otorgado a cuatro de Junio de mil ochocientos sesenta y uno, ante el notario Don Ignacio Burgoa, y como representante de mi hijo el menor Don Agustin de Iturbide, he recibido del Sr Don José de Ansoategui la cantidad de trescientos ochenta pesos, por réditos del Capital de $57000 que reconoce sobre la Hacienda de San Gabriel, el Sr Don Ignacio Amor. = Alice G. de Iturbide = Mexico, March 31 de 1873.

Como Albacea de mi esposo Don Angel de Iturbide, segun el testamento otorgado a cuatro de Junio de mil ochocientos setenta y uno, ante el notario Don Ignacio Burgoa, y como representante de mi hijo el menor D. Agustin de Iturbide, he recibido del Sr Don José de Ansoategui la cantidad de trescientos ochenta pesos, por réditos del Capital de $5700 que reconoce sobre la hacienda de San Gabriel, el Dn Ignacio Amor. = $ 380 Alice G. de Iturbide, Mexico 30 de Abril 1873.

Como Albacea de mi esposo el Sr Don Angel de Iturbide, segun el testamento otorgado a cuatro de Julio de 1871, ante el notario Don Ignacio Burgoa, y como representante de mi hijo el menor Don Agustin de Iturbide, he recibido del Sr Don José de Ansoategui la cantidad de trescientos ochenta pesos, por réditos del Capital de $57000 que reconoce sobre la hacienda de San Gabriel el Sr Don Ignacio Amor = $380 Alice G. de Iturbide - Mexico, Mayo 31 de 1873

Como Albacea de mi esposo el Sr D. Angel de Iturbide, segun el testamento otorgado a cuatro de Julio de 1871, ante el notario D. Ignacio Burgoa, y como representante de mi hijo el menor D. Agustin de Iturbide, he recibido del Sr. D. José de Ansoategui la cantidad de trescientos ochenta pesos, por réditos del Capital de $57,000 que reconoce sobre la Hacienda de San Gabriel el Sr. D. Ignacio Amor = $380 Alice G. de Iturbide - - Mexico, Junio, 30 de 1873

Como Albacea de mi esposo el Sr. Don Angel de Iturbide, segun el testamento otorgado a cuatro de Julio de mil ochocientos setenta y uno, ante el notario D. Ignacio Burgoa, y como representante de mi hijo el menor D. Agustin de Iturbide, he recibido del Sr D. José de Ansoategui la cantidad de trescientos ochenta pesos, por réditos del Capital de $57000 que reconoce sobre la Hacienda de San Gabriel el Sr Don Ignacio Amor. $380 Mexico, Julio 31 de 1873 = Alice G. de Iturbide

Mexico, Agosto 18 de 1873 = Muy Sr Mio de todo mi aprecio = Siento molestarle a V. pero tengo que rogar que me haga el favor de mandarme una copia simple del testamento del Sr Alsua, y también, una copia simple de la Escritura hecha con el Sr Ortiz, al venderle la hacienda de Puruaran, no podemos determinar que hacer antes de recibir aquellos documentos, que ninguno tenemos, ni tampoco el Sr Martinez de la Torre, Hagame V. el favor tambien de decirme como y de que manera la familia Iturbide esta de primer lugar en Puruaran. Luego que recibimos los mencionados documentos, el Sr Martinez de la Torre escribará a V. = Me repito de V. muy atenta servidora - Alicia G. de Iturbide Sr. D. Luis G. Zavala

Como Albacea de mi esposo el Sr. D. Angel de Iturbide, segun el testamento otorgado a cuatro de Julio de mil ochocientos setenta y uno, ante el notario D. Ignacio Burgoa, y como representante de mi hijo el menor D. Agustin de Iturbide, he recibido del Sr. J. José de Ansoategui la cantidad de trescientos ochenta pesos, por réditos del Capital de $57000 que reconoce sobre la hacienda de San Gabriel el Sr. D. Ignacio Amor $380 Alice G. de Iturbide - Mexico, Agust 31 de 1873.

Como Albacea de mi esposo el Sr Don Angel de Iturbide, según el testamento otorgado a cuatro de julio de mil ochocientos setenta y uno, ante el notario D. Ignacio Burgoa, y como representante de mi hijo el menor D. Agustin de Iturbide, he recibido del Sr. D. José de Ansoategui la cantidad de trescientos ochenta pesos, por réditos del Capital de $57,000 que reconoce sobre la hacienda de San Gabriel el Sr. D. Ignacio Amor,

$380 Mexico, Sept. 30 de 1873.

Como Albacea de mi esposo el Sr. D. Angel de Iturbide, Segun el testamento otorgado á cuatro de Julio de mil ochocientos setenta y uno, ante el notario D. Ignacio Burgoa, y como representante de mi hijo el menor D. Agustin de Iturbide, he recibido del Sr Don José de Ansoategui la de trescientos treinta y tres, pesos treinta y tres centavos, réditos del Capital de $57000 que reconoce sobre la hacienda de San Gabriel el Sr D. Ignacio Amor Alice G. de Iturbide, Georgetown D.C. $333,33

October 30 de 1873.

George - Town, D. C. Dec. 13 th 1873. Mep. Richd. Irvin & Co., New York, Gentlemen. = Through Mr Green, I enclosed to you some days ago an important paper, given me by the proper judicial authorities of Mexico, in order to recover the Bonds that you gentlemen hold in your hands, deposited with you by my husband, Don Angel de Iturbide, whose Executing I am, by virtue of his will, and also by the New Mexican Code, As Mr. Green has received no answer from you, I write to beg you will deliver them up to me, sending them in them in the manner you deem most safe, or if you prefer it I will go in person to receive them, = Hoping to hear from you by return of mail, I remain gentlemen, Respectfully Yours, Alice G. de Iturbide.

Mr. Venturo Marcó del Pont, Paris,

Sir; I wrote to inform you that in conformity with the New Mexican Code, I have been named by the corresponding Judge Executing of the will of my late brother- in-law Don Agustin de Iturbide in place of Mr Antonio Escandon, and Mr Martinez de la Torre.

Please let me know the amount of money you hold in your hands belonging to my son, and if to withdrawal such money you will require the official document I have brought with me form Mexico. = I would also beg you to pay to Mep. Hill Brothers of London the enclosed bill, £ 3446. Respectfully, yours Alice G. de Iturbide, George - Town D.C. Dec. 11th 1873.

Como Albacea de mi esposo el Sr Don Angel de Iturbide, segun el testamento otorgado a cuatro de Julio de mil ochocientos setenta y uno, ante el notario D. Ignacio Burgoa, y como representante de mi hijo, el menor D. Agustin de Iturbide, he recibido del Sr. D. José de Ansoategui, la cantidad de $333.33, réditos del Capital de $50,000 que, reconoce sobre la Hacienda de San Gabriel el Sr. Don Ignacio Amor. Alice G. de Iturbide Georgetown D.C. U.S.A. noviembre 30 de 1873. $333.33

Mep. Marcial & Co. New York. Jan 2º 1874. gentlemen. According to instructions from Mr. José de Ansoategui of Mexico, I have drawn on you this day for $398.45 gold through Mep, G. W. Riggs & Co of Washington, I enclose a receipt for Mr. Ansoategui, which I beg you will send him by the earliest opportunity, I remain, gentlemen, Respectfully Yours, Alice G de Iturbide.

George Town D.C. Jan 28. 1874. My dear Mr de Ansoategui = I have received your letter of Jan. 3º, and con surprised to learn by it, that you have not heard from me, I have punctually sent you through the hands of Marcial & Co. N.Y. the receipt for the money you have sent me, composing the rent deal from San Gabriel to the Months corresponding to October, November, & December, as also for two hundred dollars that you were kind enough to remit from D. Antonino Leavi, About the first of this month I wrote you which letter I trust you have received before now = I enclose a letter for D. Emilio Velasco, who will give you the receipts on "Papel sellado", as you desire, although as I wrote you before it is not necessary but it gives me great pleasure to comply with your desire in that particular. I take this opportunity to again thank you for your promptness in serving as, am begging you will present my warmest regards to your mother & Sister, I remain Very truly Yours- Alice G. de Iturbide - Mr. J. de Ansoategui

Como Albacea de su esposo el Sr. D. Angel de Iturbide, segun el testamento otorgado a cuatro de Julio de 1871, ente el notario D. Ignacio Burgoa, y como representante de mi hijo el menor D. Agustin de Iturbide, he recibido del Sr. D. José de Ansoategui la cantidad de 333.33., por réditos del capital de $50000 que reconoce sobre la hacienda de San Gabriel el Sr. D. Ignacio Amor $333.33. Alice G. de Iturbide, George-town D.C. Diciembre 31 de 1873

George town D.C. Jan. 28.1874 = my dear Mr Velasco, = I have received from Mr. Ansoategui, the rents due my sum from. S. Gabriel corresponding to the months of October, November, & December, As Mr. Ansoategui is answers I have the receipts in "Papel sellado", I beg you will give them to him as he desires. = I have not had the pleasure of hearing from you since I arrived in this country, so should like to know if you have made any arrangement about our Morelia property, and if there are any reasons to hope for a speedy settlement of the affair. = I have not heard whether or not Mr. Carsi, went to Michoacan, as was purposed when we left mexico. Please let me know about it. Agustin is in fine health he is at George-town College, and is improving he desire his complements to you, I remain very truly yours Alice G. de Iturbide, Mr. Emilio Velasco - mexico.

Como Albacea de mi esposo D. Angel de Iturbide, según el testamento otorgado a cuatro de julio de 1871, ante el notario D. Ignacio Burgoa, y como representante de mi hijo el menor D. Agustin de Iturbide, he recibido del Sr. D. José de Ansoategui la cantidad de 333.33, por réditos del Capital de $50000 que reconoce sobre la hacienda de S. Gabriel el Sr. D. Ignacio Amor. Alice G. de Iturbide George town D.C. Enero 31 de 1874

George-town D.C. March 11th. 1874 = My dear Mr. Ansoategui. = I am in receipt of your letter of Feb. 13th in which you enclose me the interest due from S. Gabriel for the month of Jan 7 last, also one hundred dollars, owed by D. Antonino Leavi, Enclosed you will find the receipt for the interest. = I am sorry I cannot accept your proposition to prolong the payment of the $50,000 due in the Hacienda de San Gabriel, I think it better to hold to the arrangement made by my husband and the others parts concerned, where in, they agree to pay $10000 annually, until the whole shall be paid. = As the gards the interest, I really have nothing to complain of once the management of the property has been in your hands as you have been most punctual in paying it, for which I again beg you will, accept my sincere thanks.

Please give my love to your mother and Anita, and believe me = Very Truly Yours, Alice G. de Iturbide. Mr. J. de Ansoategui Mexico.

George-town D. C. March 30th, 1874 Mep. Richd. Irvin & Co. New York = Gentlemen = I have received yours of the 27th. inst. enclosing a copy of an account for legal services & Co. of Lord, Day & Lord amounting to $62 50/100 - I cannot admit that this is a just charge against the estate of my late husband - As Executing I certainly have had no occasion to employ counsel, in respect to your duty and obligation to deliver to me the fonds & money in your hands belonging to said estate. Nothing could retainer - and if you thought proper As to employ counsel to advise as to year duty & in a matter which admitted of no alternative, the estate should not suffer for it, I will therefore decline to admit my liability as Executing & pay the claim. Very Respectfully Yours. Alice. G. de Iturbide,

He recibido del Sr. D. José de Ansoategui $333.33, réditos para el mes de Febrero /74 por los $50000 que reconoce San Gabriel.

(Mep. Richd. Irvin & Co New York = Gentlemen I have received)

George-town D.C. April 2° 1874 - Mr. Emilio Velasco. I have received your letters of Feb. 15th, March 8th. Please receive my thanks for the interest you manifest in my affairs. & nothing better can be done, I will accept the proposed arrangement of the Morelia indebtedness in the expectation that we will realize at least fifty per cent of the entire claim exclusive costs & expenses. to whatever may seem best for our interests and I will be contented with the result = & it is absolutely necessary let the guardian for Agustin be appointed, so that the law may be complied with. I suppose it is merely a matter of form and will resolve little in no expense = I have received a letter firm Mr. Ansoategui asking on behalf of Mr Ignacio Amor, an extension of the time in the payment of the money due on S. Gabriel, which, of course, I declined = What has been done by the President, on my memorial asking for the possessions of the law's belonging, to the family in Sonora and Lower California. Is this a propitious time to press the Executive for action in the matter? A appear for that these can be as great difficulty on the question of title - and that the property might be placed, without unnecessary delay, in the hands of the survivors of the Iturbide family - Hoping them for you by rest mail- I remain. L. T. Yrs. Alice G. de Iturbide.

Mr. José de Ansoategui = Mexico. = my dear Mr Ansoategui. I have received your two letters enclosing the monthly installments of Antonino Leavi as well as the interest due from S. Gabriel for the months of Oct. y Nov. for all you which I give you my hearty thanks. I have sent the two receipts for the interest in S. Gabril to you separately each time as you desire, that you may here them put in papel sellador by my apoderado en Mexico, but at the same time I would remind you that there is no necessity to do so, as a receipt given for money received according to the laws of this country holds good in the country where the money is paid, but of course you are free to use your own judgment about it. = I take This opportunity to wish you a very happy and prosperous new year, as well as to your mother & Sister, to whom I beg you will give my love - and believe me Very Truly yours. Alice de Iturbide[[30]](#footnote-29).

George-town D.C. Feb. 30 1874 = Mep. Richd. Irvin & Co. Gentlemen. = Through Mr. Green I have already desired you to return me the original judicial document you hold in your possession should you see for you can have a copy made charging the same to my account, the original I desire to forward to Europe in order to collect money there, you promised to send the said document but up to this time it has not been received = Begging you will do so at your earliest opportunity = I remain gentlemen Very Truly Yours = Aice G. de Iturbide.

George-town. Feb. 20th. 1874 = Hin. J. H. Nelson

My dear Cousin - I avail myself of your return to Washington, to thank you for remitting to me the three letters of Mr Washburn concerning the estate of my late brother-in-law Mr Agustin de Iturbide. In as much as his will only disposes of his effects in France, and does not interfere with the legal succession of his interest in Mexico, I am not disposed to contest it. Be good enough to ask Mr. Washburn to cease a certified copy of the will to be part to you with as little delay as possible - and express to him my sincere thanks for the trouble he has been kind enough to take in this affair. Very Truly Yours Alice. G. de Iturbide.

George town D.C. March 1874, Mep. Richd. From Co. New York: = Gentlemen = Your favour of the 21st inst. Was duly received, enclosing your apt. current from Oct. 14th 1873. with the Estate of my late husband Angel de Iturbide. among the items of which I notice, with surprise, a charge of $62. 50/100 for legal services paid to Lord day o Lord, which you will please be kind enough to explain, as also a charge for commission of $43 = - Yours very respectfully - Alice G. de Iturbide.

George town, D.C. U.S.A. May 4a 1874 Mep.

Hill Brothers, London, Gentlemen, I must beg your indulgence for my seeming neglect of your bill. I was under the impression that it had been paid some time ago by my agent. I have in this date ordered my banker in Paris, Mr. Venturo Marcó del Pont, to remit to you the £39.7s. owed by the estate of my husband, Mr. Angel de Iturbide, & not attended to promptly, please tell me kind, and I will have it paid through another channel. Very Respectfully, Alice G. de Iturbide.

George-town. D.C. U.S.A. May 5 to 1874

Mr. Venturo Marcó del Pont - Paris - Sir = Some weeks ago I wrote you enclosing a certified copy, of the decision, of the competent Mexican Tribunal, declaring me Executing according to the new mexican code, and at the request of D. Rafael M. de la Torre of the will of my late brother-in-law D. Agustin G. de Iturbide, I hope I shall soon learn that you have received the papers. In the same letter I desired you to pay to Mep. Hill Brother. London, the sum of £39.7s. If you have not already done so, favor me by attending to it at once. Hoping to hear from you by return of mail- I remain, Respectfully Yours, Alice G. de Iturbide.

Mep. Richd. Irvin & Co. Gentlemen. The Hin. J. H. Nelson of Indiana, my legal advisor will call in you Mr. Nelson is fully authorized to arrange matters between us I remain gentlemen, Very Respectfully Alicia G. de Iturbide - abril 8th 20th of April 1874

He recibido del Sr D. José de Ansoategui los réditos que debe S. Gabriel correspondiente al mes de Marzo 1874. Alice G. de Iturbide.

$333.33 George town. D.C.

He recibido del Sr D. J. de Ansoategui the rents of San Gabriel por los meses de Abril y mayo $333.33  333,33 Alice G. de Iturbide. George- town D. C. June 22.1874

$666.66

He recibido del Sr. D. José de Ansoategui los réditos correspondiente al mes de Junio/ 74, Alice G. de Iturbide. $333.33

He recibido del S. D. José de Ansoategui los réditos correspondientes al mes de Julio de 1874, Alice G. de Iturbide $333.33

He recibido del Sr D. José de Ansoategui los réditos correspondientes al mes de Agosto de 1874. Alicia G. de Iturbide. $333.33

He recibido del Sr D. José de Ansoategui los intereses correspondientes al mes de Septiembre, que reconoce San Gabriel. $333.33

He recibido del Sr. D. José de Ansoategui los réditos correspondientes al mes de Octubre que reconoce sobre la hacienda de San Gabriel el Sr. D. Ignacio Amor. $333.33

He recibido del Sr D. José de Ansoategui los réditos correspondientes al mes de Noviembre 1874 Alice G. de Iturbide. I have also received the $10000 due the last of Oct. 1874 - by a draft in London. Alice G. de Iturbide $324.38

He recibido del Sr. D. José de Ansoategui los réditos correspondientes al mes de Diciembre Alice G. de Iturbide $266.66

He recibido del Sr. D. José de Ansoategui los réditos correspondientes al mes de Enero de 1875. Alice G. de Iturbide $266.66

He recibido del S. D. José de Ansoategui los réditos correspondientes al mes de Febrero de 1875 $266.66

He recibido del Sr D. José de Ansoategui los réditos correspondientes al mes de Marzo de 1875. $266.66

He recibido del Sr. D. José de Ansoategui los réditos correspondientes al mes de Abril 1875. $266.66.

He recibido del S.D. José de Ansoategui los réditos correspondientes al mes de Mayo de 1875 $266.66.

He recibido del Sr. D. José de Ansoategui los réditos $266.66. correspondientes al mes de Junio de 1875.

He recibido del Sr. D. José de Ansoategui los réditos correspondientes al mes de Julio de 1875. $266.66.

$37,812,73

He recibido del Sr D. José de Ansoategui los réditos correspondientes al mes de $266.66 Agosto de 1875= Alice G. de Iturbide

$233.67

He recibido del Sr. D. José de Ansoategui. los réditos correspondientes al mes de Set. de 1875

£400

He recibido £400 de los $10000 que Ignacio Amor debia haber pagado a fines de setiembre. A. G. de I.

$252.09

He recibido del Sr D. José de Ansoategui los réditos correspondientes al mes de Oct. de 1875 Alice G. de Iturbide.

$252.09

He recibido del Sr. D. José de Ansoategui los réditos correspondientes al mes de Noviembre de 1875 Alice G. de Iturbide

$252.09

He recibido del Sr Don José de Ansoategui los réditos correspondientes. al mes de Diciembre de 1875 Alice G. de Iturbide.

George-town D.C. Oct. 27th 1874. Mr. Emilio Velasco. Mexico - My dear Mr. Velasco I hope by this time you have received my letter in answer to yours enclosing me a copy of the arrangement you had made with the heirs of Ortiz, and which met with my approbation. I wrote you by last past week enclosing a letter for the President which I trust has reached you also. In regard to the money you speak of, the second installment, which Mr Ansoategui is ready to pay, and which became due in the last of September, please have it forward to me by bill in London at shut sight, just as was done by the installment of last September and when it is arranged satisfactorily by us, give to Mr. Ansoategui the corresponding receipt, as also, that, for the interest many of the past year ending Sep. 3er. which I have punctually received I have the pleasure to enclose you a duplicate of my last letter, of caring have it may not reached your hands. and I remain Vy. Ty. Yours Alice G. de Iturbide.

George-town D.C. Oct. 27th 1874

My dear Mr. Ansoategui - Please do me the favor to place the $15000 of the second installment, to my order, by bills in London at shut sight, just as you did with the installment of last Sep. and I have desired Mr Emilio Velasco, to give you the corresponding que receipt as also that for the interest money for the past year ending Sep. 30th. which I have received punctually.

His Excellency Sr. Lerdo de Tejada President of Mexico. = George-Town D. C. Oct. 7th. 1874 = Sir. A little more than a year ago, accompanied by Mr. Nelson, late U.S. Minister to Mexico, I had the honor to confer with your excellency in respect to the interests represented by my son and my self, in certain real estate that had been

George-Town D.C. March 17th 1875 = My dear Mr Velasco I have just received your letter of March 2° and am surprised and mortified to learn by it that my last has offended you. I assume you these I had no such intention and if there was anything offensive in my letter, (I have no copy of it), I hope you will execute it, and believe that I meant nothing of the kind Your superior qualities and honorable position has always commanded my highest respect. As regards the naming of a tutor for Agustin, I only thought it might not be necessary, and might probably (interfere) in some way interfere with my right in respect of him. I did not for one moment think that you would involve me in “Leal Quits” but that the near guardian might be the means of so doing. = In reply to the question of the $600, I had not the money at the time I´ve received your draft, nor could I have stollen it then with me sacrifice had trouble having but recently invested the last installment for Mexico and thinking besides, that you could more conveniently for me pay yours with the interest money, you would receive in May, from Morelia not taking into consideration at the time, the improbability of its being paid. As certainly was on oversight in my part, answering from ignorance of the existing state of affairs in that part of the Republic. But that is now remedied, and please find enclosed a draft for the money for your bill. I beg you will reconsider your hasty resolution of giving up the management of my business there is nobody in whom I have more faith than in yourself, and I should be sorry to lose your good advice and kind affairs. I will end my letter by again protesting my insincere as far as the slightest suspition of attack upon your good name is concerned - and begging you to think no more of what has been to me a most painful circumstance - I remain. Vy. Ty. Yrs. Alice G. de Iturbide

George - Town D.C. April 6th 1875 = Mep. R. Barthold & Co. New York = Gentlemen In writing by in that I could not pay the draft of Mr. Velasco. I said. "Mr. Velasco is my Attorney and has money of mine in his hands". I should have said, will have interest money of mine in his hands in the month of May. By the mistake, do not think that I wished to insinuate anything in respect of Mr. Velasco´s good name, which he seems so much to fear - I had no such intention. The mistake made from my perfect confidence that the money would be paid to Mr Velasco at the promised time, when I could give him an order to pay himself out of said money, which would have been more convenient to me, I sent Mr Velasco what he says I owe him by last steamer, through Mep. Duncan Sherman & Co. of New York, and it cost me over seven hundred dollars to place the gold in Mexico = Please acknowledge the receipt of this letter Respectfully Yours, Alice G. de Iturbide.

George-town D. C. April 8a. 1875. Mr. Emilio Velasco Mexico = my dear = Sir = I have just received your letter of March 23° and am very much astonished at the tone of it, I have in no way heard of damage your reputation or credit - such an idea has never entered my mind. I had neither reason nor desire to do so. It would certainly have been a strange proceeding in me to try to injure a person who was serving me, and who had the entire and unlimited control of my affairs. - When I wrote to Mr Barthold that you were my attorney, and had money of mine in your hands. I did not mean that you had it in hand at that particular (time) moment, but that you had the control of my money, and that I would give you an order to pay yourself. They certainly could have understood it in no other way - and it seems incredible that anyone could have considered that into an attack upon the reputation of an gentlemen = Long before you wrote your last letter I had obtained the money, and I sent it to you through a Banker in N. York that does not lark much like defrauding you of your fee as your accuse me of wishing too. I have never defrauded my one, and do not owe a dollar in the world, to my Knowledge, I have written to Mr. Barthola correcting the error I made in my statement which, which you order me to do. under threat of causing me irreparable harm, and

1. Continua mi carta. La Pepe Malo, de Junio 6/70. [↑](#footnote-ref-0)
2. Con ésta, mandé á Pepe una carta de Alicia para él. [↑](#footnote-ref-1)
3. Written and Sent on a card. [↑](#footnote-ref-2)
4. Not Sent. [↑](#footnote-ref-3)
5. Calle 2da de Mesones N° 14.

   Equivocadamente volvi á empezar esta Copia. [↑](#footnote-ref-4)
6. Calle 2a. de Mesones N°, 14 [↑](#footnote-ref-5)
7. Principal a Anto. Escandon Por conducto de Escandon, Herms., duplicado a Martinez de la Torre. [↑](#footnote-ref-6)
8. Duplicate, May 18th, 1870, requesting an immediate answer. [↑](#footnote-ref-7)
9. que no sabe la mal obra que me ha hecho, detenido. dame mis $2.280 aunque, como hombre entendido en los negocios debiera hacerse cargo cuan perniciosas consecuencias acarrean semejantes deberes, ¡Dios haya querido, que no se haya presentado otro embaraza para el paquete Frances ó el anterior, americano! Al. de I. [↑](#footnote-ref-8)
10. This ought to be 20th; but I do not know how it went in my letter. July 27th/70 [↑](#footnote-ref-9)
11. I ought to have said per City of Washington. [↑](#footnote-ref-10)
12. Principal á Anto. Escandón Por conducto a Escandon Hems. duplicado á Martínez de la Torre. [↑](#footnote-ref-11)
13. A mistake I made; I might to have said Sunday the 17th. [↑](#footnote-ref-12)
14. Principal y duplicado los mandaran Riggs & Co. a sus agentes en N. York. [↑](#footnote-ref-13)
15. Duplicado Agusto 17/70 [↑](#footnote-ref-14)
16. N° of draft N° 06 6/1 [↑](#footnote-ref-15)
17. If in the letter I put the 19th, it was a mistake, for I wrote it do the 20th. [↑](#footnote-ref-16)
18. Copy sent to George Henderson on the 21st with the following note: Though in my letter wrote this draft is the 19th, I did not write the letter till the 20th. Al. de I. [↑](#footnote-ref-17)
19. Not Sent because I received this cheque. [↑](#footnote-ref-18)
20. The Jane 20th [↑](#footnote-ref-19)
21. This letter is inserted in the wrong place. [↑](#footnote-ref-20)
22. Same date [↑](#footnote-ref-21)
23. Nota: de estos $8; recibió Henderson cinco [↑](#footnote-ref-22)
24. Telegrama [↑](#footnote-ref-23)
25. 70 – rent, 30. Mrs Iturbide, 280. Bank as P. book = 380 [↑](#footnote-ref-24)
26. Duplicate Dec. 8th 1871 [↑](#footnote-ref-25)
27. if offer to have been 14 ultimo as see they lucky of that date. Al. de I. Dec. 28/71. [↑](#footnote-ref-26)
28. Duplicado Enero 30 del 1872 [↑](#footnote-ref-27)
29. It should have been march 17th/72 [↑](#footnote-ref-28)
30. (Geo.town D.C. Jan. 1874) [↑](#footnote-ref-29)
