# Supplementary material for: A Methodological Framework for the Use of AI Tools in Automated Workflows for Generating Validated and Structured Historical Datasets
Source: Research Square preprint supplement (doi:10.21203/rs.3.rs-7943432/v1), 2025-11-17
Supplement: Supplementary file 9 [file Cartas_de_Angel_Iturbide.docx]

%p1–Iturbide–2025–10–15%

Continua mi carta. La Pepe Malo, de Junio 6/70.

Con ésta, mandé á Pepe una carta de Alicia para él.

Año de 1870

mal en alguna de mis cartas; porque, nunca hé variado de opinion respecto de la marcha de George Henderson. A nadie conozco mejor para el caso que George Henderson; pero, he tenido mis dudas sobre la necesidad de su viage: tu y Martinez de la Torre, hallandose mas cerca que yo, tienen mayor facilidad para juzgar de los diferentes lados de la materia. Y lo unico, que mi hijo y yo podemos hacer, es manifestar nuestro consentimiento á pagar la parte que debidamente nos corresponda en los gastos. = A Sabina le escribí de conformidad con tus indicaciones, encargandole que á tí te dijéra su parecer; y supongo que lo habrá hecho en la carta que de ella ahora te acompaña. = Créo que no tienes motivo para quejarte de ella; pues que, ademas de esta citada carta, te incluí una en la mia de abril 21, mandandote otra, hacia fines de Mayo, por con ducto de los Señores Martínez María del Comercia de México.- Espero que no haya habido extravío. = Escribiendole tú á Agustín C., no véo la necesidad de que yo lo haga; porque, al fin

%p2–Iturbide–2025–10–15%

y al cabo, yo le habría de aconsejár, lo mismo que hice con Sabina; que se entendiéra contigo, directamente,- Con los mas sinceros deseos de ser servicial, estoi resuelto a evitar, en lo de adelante, inutiles responsabilidades. = Desde 21 de Abril te dije que, yá que la pobre de Pepa Manzanera habia fallecido, dispusieras de los consabidos $40 en beneficio de su hijo Agustín. Mas, para el caso de que no lo hayas hecho, ahora te autorizo para gastarlos en provecho de Concha ó de quien de los parientes mas los necesitare. Tú, que estás entre ellos, sabrás mejor que yo. = Los ligeros servicios que a mis parientes hé hecho, los hé hecho con el corazon en la mano; y me alegraré que ellos los hayan aceptado de buena voluntad. = Te equivocas sobre la salud de mi hijito. Es Sumamente fuerte, y unicamente adolece de la maldita propensión al garrotillo; y no dudo que ésta desaparezca con la edad. = Créo que Alicia te escribirá. - Muchas y cariñosas memorias á todos los parientes. = Como siempre tu muy afecto primo, = Angel de Iturbide

%p3–Iturbide–2025–10–15%

Rosedale= near George-town, D. C.

June 9th, 1870

Mep. de Iturbide = N° 1344 Spruce Street = Philadelphia. = My dear Sabina: = I have received your letter of the 29th of May, with the one which it enclosed for Pepe Malo; and said letter for Pepe is, now, on its way to Mexico. = But, as one good turn deserved another, could you not do me a favour? = It is possible, that I may pass the summer away from this place; but, the hotels at the springs are horribly dear. Now, I can think of no place except Bethlehem, and I should like to know not only the facilities for reading that toran, but like-wist, what kind of hotels are to be found and the price of board Hodging - Can you give me any information on those points, by asking it of some friends, without trouble to yourself? - At all events, let me know, as soon as may be, whether you can do so or not. = I have received a letter from Augustin C. dated May 18th. He appeared to be in good health. = we are all well. - Compliments from Mrs. Green, love from Alice and a kiss from my boy. = Your affectionate brother, = Angel

%p4–Iturbide–2025–10–15%

Mr. de Iturbide offers his compliments for Written and Sent Major and Mrs Reholson; regretting much that Mrs de Iturbide says, that she is afraid, on account of her mother's health, to hold any kind of celebration at Rosedale, = Thursday, = June 9 th

Rosedale, = near George town, D. C.

June 15th, 1870[[1]](#footnote-0)

Mep. Richd. Irvin Co. = N. York. = Dear Sirs. = Be so very good as to discount my coupons, payable on the 1st of September, and send me a cheque, in gold, signed by yourselves. = I am, =dear Sirs = your obedient servant Angel de Iturbide

Rosedale, = near George town, D. C.

June 18th, 1870

Mep. de Iturbide = 1344 Spruce St = Pha. My dear Sabina = In answer to what you ask me in your letter of the 11th instant in regard to A.C.’ S coming to the U.S., I must tell now, that I have heard nothing of it.= I think, that he

%p5–Iturbide–2025–10–15%

wishes to go to Mexico; but, I do not know how soon he may go.= I send you a letter from Pepe Malo, - If you want me to send your answer, you must remit it, at once. = Judging from my correspondence, you will soon get some money from the Alsua legacy. And I hope that Pepe tells you so. = Love from Mrs. Green, Alice & my darling boy. = Your affectionate brother, = Angel

Rosedale = near George-town, D. C.

June 18th, 1870

Mep. Richd Irvin Ho. = N. York. = Dear Sirs; = I beg you to be so kind as to advise me what should be the discount on my 10-40 Bonds due 1st September, from the 1st proximo, and including commission. = Truly Yours, = Angel de Iturbide

Rosedale, = cerca de George-town, D. C.

Junio 20 de 1870

Señor Licenciado Don Luis G. Zavala = Morelia. = Mi estimado Amigo y Señor. = Con su apreciable carta de Mayo 20 pasado he recibido la liquidacion a que se refiere; dando á V. las debidas gracias. = Los $300,

%p6–Iturbide–2025–10–15%

rebaja por perdidas en Puruarán, y los $336.62 por un prestamo forzoso del Gral Mendez, forman dos partidas que pueden muy bien disputarse. = Además, la cantidad de $7 489. 91 por gastos y honorarios es -permítame V. decirlo- excesiva, haciendo comparacion con la hémos recibido los legatarios de los $50.000; pero, el Sr Martinez de la Torre quiza formará diviersa opinion, en vista de la cuenta razonada que V. le presente. = Esperando que, por fin, se alcance un arreglo definitivo de los legados Manuel Alsua y Huarte, me es grato repetirme de V. = afmo amigo S. S. q.b.s.m. = Angel de Iturbide

Rosedale= near George - town, D. C.

June 20 th;1870

George F. Henderson Esq.= Morelia. = My dear Henderson: = I am in receipt of your favour of the 25th ultimo, with its accompanying diary to the same date and the Lic. Zavala's letter & liquidation. = By my answer to that gentleman, which please peruse, you will see my, opinion

%p7–Iturbide–2025–10–15%

regarding three items of the liquidation.= I confess, that I do not see, why the Lic. Zavala has not, heretofore, ached more promptly on the Huarte legacy; and I am certain, that a few instalments were paid, though my cousin Pepe Malo is better informed than I of the amount. = As the Iturbide Suit on Apeo belongs entirely to questions on law; I do not very well see how any instructions to you from me could further our interests in the matter. - Both Martínez de la Torre & D. Miguel Martinez write me, that they are now acting in concern. = You do not tell me the terms upon which you, at last, went to Morelia. = Seven months are now due on the $57.000, and Martínez de la Torre writes me, that he was about to make "un cobro serio al representante de D. Ignacio Amor de los réditos." - I hope the result will be favourable. = I hope, indeed, that you may succeed in arranging the Morelia legacies; and should you come to

%p8–Iturbide–2025–10–15%

this country, I shall be most thankful for such services as you may be able to render the Iturbide family. = Araoz has not sent the Revue. = Wishing you all happiness, and looking out for your promised letter per French Steamer = I am = truly yours, = Angel de Iturbide.

This goes through Martínez de la Torre. = Al. de I.

Rosedale = cerca de George town, D.C.

Junio 21 de 1870

Sr Lic. = D. R. Martinez de la Torre = México. Mi muy querido amigo. = Son en mi poder su apreciable de 29 del pasado y la carta de George Henderson de Morelía, cuya contestación acompaño, suplicando á V. que me haga el favor de remitirla. = Con fha. de ayer digo, entre otras cosas, lo siguiente al Sr. Lic. Zavala. "Los $300, rebaja por perdidas en Puruarán, y los $336.62 por un prestamo forzoso" de hasta "cuenta razonada que V. le presente". = Me felicito por las conferencias que ha tenido V. con el Lic. D. Miguel

%p9–Iturbide–2025–10–15%

Martínez; teniendo esperanzas de que saquemos algunos pesos del litigio sobre apeo = Aguardo, con impaciencia, la correspondencia por el Paquete frances; porque, segun sus promesas de V., debe traerme el resultado del serio cobro que estaba V. resuelto á hacer al representante de D. Ignacio Amor. = Yá son siete meses los que se adeudan de réditos, y tal falta de puntualidad es difícil de explicar. - Y, tambien, hay que pensar en los primeros $28.500, pagaderos en 30 del próximo Setiembre. = Reciprocando sus expres. á mi familia, me dejo de V. como siempre muy afecto. Amigo q. b. S. m. = Angel de Iturbide.

¿Que no querrán por fin los albaceas de los Sres Echeverria someter á arbitros la cuestión de réditos del dinero que prestaron a la familia Iturbide? = Al de I.

Rosedale, = cerca de George-town, D.C.

Junio 21 de 1870Sr. D. José R. Malo = México = Mi muy querido Pepe.: = Tengo

%p10–Iturbide–2025–10–15%

por delante tu apreciable de 25 del pasado Calle 2da de Mesones N° 14.

Rosedale = cerca de George-town, D. C. [[2]](#footnote-1)

Junio 21 de 1870

Sr. D. José R. Malo = México = Mi muy querido Pepe: = Tengo por delante tu apreciable Calle 2a. de Mesones N°, 14 de 25 del pasado; habiendo remitido á Sabina la carta que le escribiste y entregado á Alicia la amable de Conselice con la fotografía de los niños: nos parecen muy bonitos estos y bien sacado su retrato.- Si Sabina me enviare á tiempo su contestación, te la acompañaré. En efecto, hé recibido carta de Henderson de Morelia; y me felicitaré con mis demás colegatarios de que su viaje de por resultado, no solo el pago de los réditos, sino el arreglo definitivo y seguro para el pago del capital. De otro modo, me temo mucho que las buenas intenciones de Manuel Alsua para con nosotros queden burladas, casi enteramente. = En la liquidacion de réditos - de la cual debes tú yá tener copia - se nos cargan mancomunada

%p11–Iturbide–2025–10–15%

mente á mi hijo y á mí las cantidades que recebió Agustin G. y las que yo hé recibido. Estoi completamente conforme con tu opinion de que de tal modo será mas facil el reparto: yo no quiero sacar ventaja ninguna sobre mis hermanos, pero, si ellos se cruzan los brazos, yo nunca lo hé de hacer. = Volviendo á la liquídacion del Lic. Zavala le digo, ayer: “Los $300, rebaja por perdidas en Puruarán y los $336.62 por un" de hasta "que V. le presente." = En efecto, Pepe, es absurdo lo que carga Zavala, hasta donde yo tengo datos para juzgar; y, si la cosa sigue, moriremos nosotros, y nuestros hijos tendrán que contentarse con las cuentas del Gran Capitan. = Otro punto sobre el cual no hé querido escribir á Zavala, sin consultar contigo previamente. - En la deduccion comun, habrás notado la partida que dice: "Remision al Sr Malo para la familia - $1.700." = Hé examinado mis cuentas y de ellas deduzes, que unicamente te há remitido Zavala la cantidad de mil ciento veinticinco pesos.-Dime si tengo

%p12–Iturbide–2025–10–15%

razon, ó en qué consiste mi error.- Tu carta de Set. 20 de 66 - habla de 600 ps., la de Julio 17 - 67, de 525 ps. Si alguna otra carta me hás escrito que trate del deficit de 655 ps., yo nunca la hé recibido. Digo 655 ps.; por que Zavala carga $80 por situación en México de los $1.700. = Yá en 6 del actual te dije que podias disponer de los 40 ps. en beneficio de Concha, caso de créerla tú mas necesitada que su hermano Agustín.- Considero que Martinez de la T. tiene fondos en su poder de los cuales pueda yo disponer pa. cubrir los 40 ps: si se negare á pagar mi carta orden, veremos a ver de donde sacamos la repetida cantidad. = Alicia queda aguardando tu carta; creo que se la debes.= Algo te tiembla la mano; mas, tienes la misma claridad que antes en las ideas y dále gracias a Dios por tán fuerte beneficio, á tu edad. = Alicia te manda muchas memorias y mi hijito. te devuelve un muy estrecho abrazo = En otra ocasion, quizá te esplicaré eso de la pesadez de la pluma.- No se por qué los Albaceas de los Sres Echeverria no quieren

%p13–Iturbide–2025–10–15%

someter á arbitros - segun entiendo - la cuestion de réditos, = Saludanos cariñosamente á los parientes, y crée que te ama tu primo, - Angel de Iturbide. = Escusame los borrones pero escribo de prisa.

Rosedale, = cerca de George-town, D. C.

Junio 22 de 1870

Sres J. Rafecas Ha= Habana. = Muy Sres mios: = En 23 del pasado, contestando a su grata de 7 del propio mes, supliqué a V.V. que me acusaran recibo de la correspondencia que entonces remitía. - Seguramente la carta de V.V. a ese efecto se habrá extraviado. = Mas, ahora, espero que me harán el favor de decirme que hán recibido las adjuntas para México; Siendome importantes. = Aprovecho la ocasion de repetirme su afmo. S. S. q.b.s.m. Angel de Iturbide

Rosedale = near Geo-town = D. C. = June 27th, 1817.

Mep de Iturbide = 1344 Spruce Street = Philadelphia = my dear Sabina.=

%p14–Iturbide–2025–10–15%

Why do you not answer my letter? - Are you sick? -You know I sent you, on the 18th, a letter from Pepe Malo, in which I think he must have given you good news in regard to the Manuel Alsua legacy. - I wish, whenever I send you letters. from others, that you would immediately acknowledge their receipt; for, I am always afraid of miscarriages.= How are you getting on with the warm weather? Here, it is insufferable, Indeed, if it continue, I shall go to some watering place or other; even for a few days.= Mrs. Green's compliments to you, together with Alice’s love & a Kiss from my boy.= Ever your affectionate brother, = Angel

In a letter written by Alice on July 2nd - I say, July 3rd/70, to Sabina - I have, my dear Sabina, read your letter of June 30th - affectionately = Angel

Rosedale = Cerca de George-town, D. C.

Julio 8 de 1870

Sr. Lic. D. Miguel Martínez = México. = Mi muy estimado Amigo y Sr. = Habiendome enterado detenidamente de cuanto se sirve V. comunicarme en su grata de 28 de Mayo pasado, véo, con satisfaccion, que, vencidas ciertas

%p15–Iturbide–2025–10–15%

dificultades, están resueltos el Sr Martinez de la Torre y V. á seguir sus gestiones, hasta concluir el asunto sobre Apeo. = Y, á la vez, quedo esperando, con alguna impaciencia, sus nuevas cartas; porque muchos años han pasado, desde que se comenzó el litigio en cuestión. = Deseando á V. la mejor salud, asi como a su apreciable Señora y familia, repitome su afmo. Amigo S. S. q. b. s. m. = Angel de Iturbide

Rosedale = cerca de George-Town, D. C.

Julio 11 de 1870[[3]](#footnote-2)

Sres D. Antonio Escandon y Lic. D. R. Martínez de la Torre= México. = Mis queridos Amigos: = Recuerdo á V.V. que sobre los consabidos $57.000 se me adeudan ocho meses de réditos; es decir, la cantidad hasta el 30 del ppdo. Junio- de $3.040 -, al 8% anual. = Sin tener motivo de saber, si les séa a V.V. satisfactorio lo que ha pasado y está pasando en éste asunto del dinero que mi hermano dejó á mi hijo, me repito de V.V. a dicho amigo q. b. s. m. = Angel de Iturbide

Rosedale, = cerca de George-town D. C.

Julio 11 de 1870

Sr D. Manuel Araoz= México = Mi siempre estimado

%p16–Iturbide–2025–10–15%

amigo y Sr. = Hé tenido el gusto de recibir la apreciable carta de V. fha. 11 del pasado, con la revista del Trait d´ Union del día anterior. = Me alegraré sobremanera, como bien puede V. imaginar, que se realicen las esperanzas de Henderson en Morelía. -Algo estraño, que solo una vez me haya escrito desde aquella ciudad; habiendo remitido mi contestacion, en 21 del pasado, al Sr Martínez de la Torre, á quien entonces tambien escribí. = Tenga V. la bondad de entregar a este último la adjunta carta; diciéndole, en mi nombre, que quedo ansiosamente aguardando saber el resultado del serio cobro que, en la semana de Mayo 29, se proponía hacer al representante de D. Ignacio amor, de réditos. = Enterado de cuanto me comunica V. respecto de los citados réditos, estoi convencido de que me los remitirá, luego que los cobre.- Reciba V. mis cumplidas gracias por sus gestiones. = A la vez, agradezco sus atenciones para con mi familia, ofreciendole nueva seguridad del verdadero afecto de su amigo S.S.q.b.s.m. Angel de Iturbide

%p17–Iturbide–2025–10–15%

Rosedale = near George-town, D. C.

July 11th, 1870

Mep. Austin Baldwin & Co. = American – European - Express= N°. 72 Broadway = N. York. = Gentlemen: = Being impatient to receive a package for me with clothes from London, - which is overdue - I take the liberty of asking, if, perchance, it has reached you; under consignment to Mess. Weston & Gray of your City. = I remain your - obedient Servant = Angel de Iturbide

Rosedale = cerca de George-town, D. C.

Julio 13 de 1870.

Sr D. Agustin C. de Iturbide= Neuilly sur Seine.= Mi muy querido Agustín. = Mi carta de Abril 27 puede casi servir de contestación á la tuya de Mayo 5: Pero, no tienes razon para imaginarte que ni yo ni Alicia te olvidamos; muy, por lo contrario, hablamos con mucha frecuencia de ti, y ahora, solo aguardaba que Alicia recibiera tu respuesta á la carta que te dirigió hace mas de un mes, para ocuparme de lo que me  dices en 18 del citado Mayo.- Pero,

%p18–Iturbide–2025–10–15%

no le escribes á Alicia, y quizá estarás enfermo. = En efecto há muerto Pepa Manzanera, despues de una larga y penosa enfermedad en la cual dió pruebas de resignacion y paciencia. Como habras sabido de Pepe Malo, su hijo de Pepa, Agustín, ha quedado atrás en un estado lamentable. = Soi completamente de tu opinion, que los Echeverria no tienen derecho a cobrarnos réditos. Mas, tienen en su poder nuestros bonos, y mucho me temo que no quieran someter la cuestión á arbitros. = Yo, también, quisiera vender la parte que me toca en los terrenos de Sonora, pero, no veo modo de hacerlo, ni tengo conocimiento de lo que Isham haya conseguido de la Lower California Company. Ni creo, que nos lo diga. = Dudo mucho que el actual Gob. Mexicano tome en consideracion lo que pudieramos alegar respecto de los arreglos con Maximiliano; aunque si tengo muy presente, que Pepa y Salvador siguen con sus titulos. = Las últimas noticias, que de México tengo, son favorables en lo

%p19–Iturbide–2025–10–15%

tocante al legado Manuel Alsua. Nada agrego; porque Pepe Malo le habrá comunicado, indudablemente, cuanto haya de saberse.= Hé visto por los diarios, que por allá há habido secos y fuertes calores. Aqui, han caído fuertes aguaceros, despues de algunos dias de una temperatura insoportable. Alicia y nuestro chiquillo están sin novedad: recibe muy cariñosas memorias de la primera, que aguarda tu carta con ansias; el segundo te manda un beso dulce, como él sabe darlos. = Que esta carta te encuentre con perfecta salud, y no dudes que soi invariablemente tu muy adicto hermano y amigo, = Angel

Te acompaño una fotografía sacada de un Daguerreotipo, que á su vez, fué tomado de la miniatura que recordarás de Chucha. No le hace favor; sin embargo, algo se le parece.- Sabina estaba fuera.= Angel

Rosedale = near George-town, D. C.

July 14 th, 1870Mep. Hill Brothers= 3 Old Bond Street = London = Gentlemen: = Your letter of the 9th June, in acknow

%p20–Iturbide–2025–10–15%

ledgment of mine of the 20th May, came to hand three weeks ago; and, since then, I have heard nothing further of the clothes to which they refer and which I want.= Has there been, on your part, delay in making or forwarding the same? Or, has there been some misdirection? - as I have a little impatience, I would thank you to be so good as to advise me there on, without loss of Steamer. = Yours = Angel de Iturbide[[4]](#footnote-3)

Rosedale = cerca de George-Town, D. C.

Julio 16 de 1870

Sr Lic. D. Luis G. Zavala = Morelia. = Mi estimado Amigo y Sr. = En 9 y 22 de Mayo y 20 de Junio he escrito á V., sin recibir contestación. = En 6 del citado Junio, me dice el Sr Henderson que por el propio paquete me dirigía V. una carta, que por cierto no he recibido. Y, como su contenido debe haber sido importante a juzgar por las palabras de dicho Sr Henderson, suplico á V. que se sirva tener la bondad de comunicármelo de nuevo. agregando cuanto, hasta la fecha, séa

%p21–Iturbide–2025–10–15%

conducente al estado, que guardaren los legados Alsua y Huarte. = Hagamé V. el favor de saludar en mi nombre a su apreciable familia, mandando a su afmo amigo S. S. q.b.s.m. = Angel de Iturbide

Rosedale= near George-town, D. C.

July 16th 1870

George F. Henderson Esq = Mexico or Morelía.= My dear George Henderson: = On yesterday I received your favour of the 6th ultimo; the delay is erring to its not reaching Araoz, till after mailing his to me of the 11th. = My last letters to you were dated, May 22nd and June 6th & 20th; and I again, particularly, draw your attention to what I say in regard to the Lic. Zavala's account; you taking care to bring my points to Martínez de la Torre´s notice, notwithstanding I wrote him thereon. = I have carefully read your details on both legacies, and I see that your visit to Morelia has been of service to the Iturbide family. = But, I am very much in the dark as to final result; for, you did not write to me, by the English steamer, and the Lic. Zavala did not do so, by the French Packet,

%p22–Iturbide–2025–10–15%

as you will see by the accompanying letter, which please read & deliver, or send. - At all events, Araoz says, that the Lic. Martínez de la Torre is content with what you have accomplished. So that I judge, that he will be in favour of your returning; my boy & myself being ready, as before, to pay our proper share of the expenses & perquisites.= Araoz, under date of the 29th June, tells me, that they had received from Pepe Ansoetegui $2.280, in payment to the 30th of April. But, as my bad luck would have it, the 29th was a feast day, & the money could not be sent; & I hope, that no new obstacle will have prevented its remittance by the American or French Steamer. God knows.- All this is very prejudicial. = Your informe on the Huarte legacy, seems to me very satisfactory; thought I am sorry, that I do not know what has happened after June 6th. = This is a strange people. News reached here, yesterday, that, France had at two o' clock declared war upon Prussia. And, notwithstanding, Congress, with

%p23–Iturbide–2025–10–15%

the full knowledge, that such was or would be the case, adjourned till December; as much as to say, that, for all they cared, Europe might be in flames. Now, we all know that a war between, two such powers as Prussia and France - even if it should not extend - must produce its consequences upon the monetary & commercial affairs of all nations. To this country such as war may or may not be advantageous; but, we already begin to feel its effects in the Stock & Gold markets - it could not be, otherwise. = Madame de Iturbide sends you her compliments & my Agustin thanks you for thinking of him. = Very truly yours. = Angel de Iturbide

The weather is terribly hot.

Jul 17th/70 - See to it, that Martinez de la Torre & Antonio Escandon demand the $28.500 on or before the 30th of September = Al. de I.

Rosedale = cerca de George-town, D. C.

Julio 17 de 1870

Sr D. Manuel Araoz = México. = Mi muy estimado amigo y Sr: = Inclusas en su grata carta de 29 del pasado hán llegado la de Henderson

%p24–Iturbide–2025–10–15%

y la Revista correspondiente del Trait d´ Union. = Felicitandome, sobremanera, de que, por fin, se hayan pagado al Sr Martinez de la Torre seis meses de los réditos vencidos sobre los $57.000, no puedo menos de quejarme de mi mala suerte; porque, no pudo, desde luego, remitírteme la indicada cantidad. - Con las demoras y faltas de puntualidad se me ocasionan, además de molestias, serios daños y perjuicios. = Pero, aún cuando me hayan venido los $2.280 citados, se me adeudaran Mayo, Junio y los dias, hasta la fecha, de este Julio. = Y, en el muy importante concepto de que, en 30 del próximo venidero setiembre, hay solemne obligacion de entregarme la primera mitad del capital que se me reconoce, ó sea la suma de $28.500.- Por lo mismo, encargo a V., muy encarecidamente, que, en mi nombre, diga a los Sres D. R. Martinez de la Torre y D. Antonio Escandon, que estoi confiando en que tendrán cuidado del cumplimiento de tan importante clausula

%p25–Iturbide–2025–10–15%

del contrato de Octubre de 1868, exigiendo, a su debido tiempo, el pago de la dicha primera parte del capital de $57.000. = Acompaño la adjunta contestacion, que ruego a V. tenga la bondad de entregar ó remitir á Henderson, cuya carta, por su atraso, no me participa el definitivo resultado de su viaje.- Pero, sin contar con que Henderson es empeñoso y activo, es buena señal que el Sr Martínez de la Torre esté contento. = De buenas ganas, y agradeciendo los buenos deseos que me manifiesta V. de verme, me establecería, pronto, en México.- Las pasiones políticas exigieron nuestro destierro, en nuestros primeros años; tuvimos que salir de México, otra vez y en reciente epoca; y, quizá nuestra mala estrella pedirá, que nosotros los hijos de D. Agustín de Iturbide pasemos los días de la vejez, lejos del lugar en que reposan los huesos del Libertador de su patria. = Mi esposa manda a V. sus cumplimientos con un beso de mi Chiquillo, y yo me repito, como Siempre, su afmo amigo S.S. q.b.s.m. = Angel de Iturbide Juilo 18 de 70.- Diganle V., por mi, á D. Antonio Escandon,[[5]](#footnote-4)

%p26–Iturbide–2025–10–15%

Rosedale = cerca de George town, D. C.

Julio 18 de 1870

Sres J. Rafecas Ha. = Habana.- Muy Sres mios: Escribí á V.V. con fechas de Mayo 23 y Junio 22, y aunque pedí contestación, ninguno hé tenido. = No sé á que atribuirlo; pero, empieza a parecerme que alguna casa ha sucedido, la cual me es imposible adivinar.= Para mi hán sido agradables las relaciones que, por escrito asi como personalmente, hé llevado con V.V. ; siendome, á la vez, importante el servicio que me hacen de recibir y trasmitir mi correspondencia. = Por tales motivos, quedo esperando con impaciencia una franca contestación suya; y me es grato repetirme, entretanto, de V.V. afmo Amigo = S. S. q.b.s.m. = Angel de Iturbide

Ruego a V.V. que tengan la bondad de encaminar a México la adjunta carta. = Al. de I

Rosedale = near George - Town, D. C.

July 18th, 1870

Mep. Weston & Gray = N. York. = Dear Sirs: = In being important to me to avoid all chances of miscarriage

%p27–Iturbide–2025–10–15%

for the enclosure, I beg you to be so good as to forward the same, per first Steamer to Havana. = And, I am expecting a box from England, which I think will come to Mep. Austin Baldwin & Co. & to your consignment.- Should it come, will you do me the favour to see that they pay the duties & forward to me, with as little delay as possible. = I remain, = dear Sirs, = Your obedient Servant, = Angel de Iturbide

Rosedale = near George-town, D. C.

July 22nd, 1870

Mep Austin Baldwin & Co. = American-European - Express Co. = N.° 72 Broadway = N. York. Gentlemen! = In answer to your notice of this 22nd[[6]](#footnote-5) instant, I beg you to do me the favour to pay the duties of the case which has arrived per Steamer Washington[[7]](#footnote-6); which duties Mep. Weston & Gray of your City - N.° 64 South St- will reimburse to you in my name, according to their anticipated & kind promise. = And I would ask of you the favour to forward, with the least possible delay, the case to me at George-town, D. C., per Adams

%p28–Iturbide–2025–10–15%

Express. = I remain your obedt. Servt. = Angel de Iturbide

Rosedele= near George-town, D.C.

Julio 23 de 1870 [[8]](#footnote-7)

Sres D. Antonio Escandon y Lic. D. R. Martínez de la Torre = México. = Mis queridos amigos: = Há llegado el paquete Americano, sin traerme la libranza equivalente a los $2.280, que llevaban, no se cuanto tiempo, de hallarse en sus manos. Tal falta de comedimiento y de consideracion, por parte de V.V. para conmigo, no puedo explicarla; pero, - ademas de ocasionarme sendas molestias que no hay necesidad de tomar en cuenta - acarrea verdaderos perjuicios pecuniarios á mi hijo. Espero, sin embargo, que la citada libranza me vendrá con mi correspondencia del paquete frances; es decir, dentro de seis ó siete dias: aunque, por otro lado el hecho es, que en la actualidad se mi adeudan cerca de nueve meses de réditos sobre los consabidos $57.000. = En 30 de Setiembre del corriente año debe entregarseme la primera mitad de tales $57.000, y, por lo mismo, ruego a V.V. del modo mas encarecido, que exijan, en tiempo habil y oportuno, el pago de la cantidad de $28.500=

%p29–Iturbide–2025–10–15%

Si V.V. se cruzan los brazos y no cuidan del cumplimiento de las estipulaciones del contrato de Octubre de 1868; contrato, según ántes les hé manifestado, muy favorable a la Testamentaría de D. Manuel Escandon, entonces, el obvio resultado será, que mi hijo pierda el capital de $57.000; que reconoce la Hacienda de Sn. Gabriel, como parte de los bienes de la citada Testamentaría.- Esto lo saben V.V. mejor que yo. = Aguardando la contestacion a la presente carta, me refuto, como siempre de V. V. adicto amigo q.b.s.m. = Angel de Iturbide

Rosedale=cerca de George-town, D. C.

Julio 23 de 1870

Sr. Lic. = D. Luis Zavala = Morelía. = Mi estimada amigo y Sr. = Notablemente atrasada recibí, ayer, su apreciable carta de Junio 6, á la cual hice referencia en la mía de 16 del actual mes, y es de suponerse que yá habrán llegado a sus manos las que dirigi á V. en Mayo 9 y 22 y Junio 20.- Tambien, le escribí en 16 de éste mes, como acabo de decir = Respecto del legado Alsua, saco en limpio, que pagará el deudor $6.000

%p30–Iturbide–2025–10–15%

por cuenta de los réditos, de cuya cantidad no tendremos mi hijo y yo opción á recibir sino $147.79 1/2 que, segun la cuenta de V. de 25 de Mayo ppdo, se nos adeudan de tales réditos.- Y, lejos de imaginar la menor objecion, me felicito de que mis colegatarios reciban, en cuanto antes, las cantidades que deban igualarnos con mi hijo y conmigo. = Pero, por el lado contrario, vea con sentimiento que las cosas presentan, en la actualidad, un aspecto mucho menos favorable que en Marzo, cuando dirigió V. sus consabidas cartas al Sr. Lic. Martínez de la Torre, en lo tocante al pago del Capital, también. = En fin, infiero y conozco que a mi hijo y a mi no nos queda otro recurso que el de aguardar hasta setiembre, con la esperanza, que siempre queda en semejantes casos, de lograr el fin algun arreglo definitivo. = Pasemos, pues, al legado Huarte. - Deduzco de la relacion de V., que hay probabilidad del pronto pago por D. Vicente Sanchez de unos cinco o seis mil pesos; asi

1. [↑](#footnote-ref-0)
2. [↑](#footnote-ref-1)
3. Principal a Anto. Escandon Por conducto de Escandon, Herms., duplicado a Martinez de la Torre. [↑](#footnote-ref-2)
4. Duplicate, May 18th, 1870, requesting an immediate answer. [↑](#footnote-ref-3)
5. que no sabe la mal obra que me ha hecho, detenido. dame mis $2.280 aunque, como hombre entendido en los negocios debiera hacerse cargo cuan perniciosas consecuencias acarrean semejantes deberes, ¡Dios haya querido, que no se haya presentado otro embaraza para el paquete Frances ó el anterior, americano! Al. de I. [↑](#footnote-ref-4)
6. This ought to be 20th; but I do not know how it went in my letter. July 27th/70 [↑](#footnote-ref-5)
7. I ought to have said per City of Washington. [↑](#footnote-ref-6)
8. Principal á Anto. Escandón Por conducto a Escandon Hems. duplicado á Martínez de la Torre. [↑](#footnote-ref-7)
