# Supplementary material for: A Methodological Framework for the Use of AI Tools in Automated Workflows for Generating Validated and Structured Historical Datasets
Source: Research Square preprint supplement (doi:10.21203/rs.3.rs-7943432/v1), 2025-11-17
Supplement: Supplementary file 17 [file GOMEZ - raw.docx]

El día 11 de este mes, entró a México el correo de España, y en éste vino la noticia del casamiento del infante don Luis y del decreto del rey en que se decía, que si su hermano hacía ese casamiento, fílese fuera de España y de sus dominios con otros agregados muy malos. En este correo le vino al señor don Francisco de Viana, la gracia de consejero eje Indias, y fue en domingo.

El día 13 de agosto de 1776 en México, en la calle de Santa Clara, en casa del marqués de Torre Campo, parió una muía prieta golondrina un potranquillo de color grullo con las orejas y las pezuñas amuladas; cosa que dio quehacer a todos los vecinos de esta ciudad, pues no se había visto hasta este tiempo cosa semejante. Yo fui testigo de vista de la muía y el potrillo. Dicha muía era de silla de coche, y el día de San Hipólito trabajó todo el día hasta las ocho de la noche, que fue cuando parió, y fue siendo virrey el señor don frey Antonio María de Bucareli y Ursúa, a quien llevaron madre c hijo a enseñar, y fue en martes.

El día 20 de agosto en el Real Palacio, murió don Manuel Serrano, capitán de Caballería del Regimiento de Montesa. Este caballero era de la familia del señor virrey Bucareli, y fue el primero que entró en esta Corte de México de toda la familia del señor virrey. Y justamente este mismo día en México, murió mi ahijada María Josefa Ignacia Cirila Montaño.

Nota

Don Manuel Serrano se enterró en la casa Profesa, hoy llamada San José el Real, en la entrada de la sacristía, frente al altar del Señor de la Buena Muerte.

El día 21 de agosto de 1776 en México, en la Real Aduana, estando la señora doña Ana María de Uribe en un balcón que cae a la calle de la Encarnación, sin saberse cómo, cayó a la calle y se mató; de forma que sus sesos se extendieron en las piedras. Esta señora era viuda del señor don José Alfaro, oidor que había sido de esta Real Audiencia, y dicho señor se cayó muerto de repente, con que marido y mujer tuvieron, muerte lastimosa. Esta última se enterró en San Francisco, y su muerte fue en miércoles.

• 29 •

El día 22 de agosto de 1776 en México, sacaron de la cárcel de la Acordada para darles garrote a Felipe Santiago, alias..., casado, negro, y a Anastasio Basilio, mestizo, por ladrones de caminos. Y fueron los primeros que se ajusticiaron en la cárcel nueva. También sacaron a la vergüenza a una mujer y a un hombre, los que estuvieron debajo de la horca mientras duraba la justicia, y después este mismo día de la misma cárcel, sacaron a tres hombres, azotándolos por las calles acostumbradas, y era capitán de la Acordada don Francisco Ariztimuño, y fue en jueves.

J^epticmbrc de 1776

El día 4 de este mes en México, sacaron de la cárcel de Corte para ahorcarlo, a Juan José Verduzco, español de esta ciudad, de 19 años de edad, por haber matado a su amo y haberlo robado, y flie en miércoles.

El día 8 de septiembre en México, murió el célebre compositor de música don Francisco de Grande. Este caballero era alcalde mayor de Texcoco.

El día 10 de septiembre de 1776, entró el aviso de España con la noticia de que los portugueses habían ocupado el fuerte de Santa Teresa en Montevideo de Buenos Aires, y otras noticias

Nota

El día 7 de septiembre de 1776, en el real acuerdo, tomó posesión de oidor supernumerario el señor don Francisco Gómez Algarín.

El día 13 de septiembre de 1776 en México, sacaron de la cárcel de la Acordada un hombre, dándole 200 azotes, y era capitán de la Acordada don Francisco Ariztimuño, en viernes.

El día 15 de septiembre de 1776 en México, en todas las iglesias se leyó un edicto por orden del rey nuestro señor don Carlos III, para que todos los años, días 11 y 12 del mes de diciembre, se repicase con esquilas, que en este día 12 fue la aparición de Nuestra Señora de Guadalupe, y fue en domingo el dicho edicto.

El día 18 de septiembre de 1776 en México, sacaron de la cárcel de Corte para ahorcarlo, a Salvador Andrés Guerrero, por ocho homicidios y treinta y tantos heridos, y se hizo la sentencia de la justicia en miércoles.

El día 22 de septiembre de 1776 en México, murió don Alejandro Guerra, marqués de Uluapa, y se enterró en San Francisco el día 23.

El día 25 de septiembre de 1776 en México, sacaron de la cárcel de Corte a un hombre mulato, para ahorcarlo, llamado..., y fue en miércoles.

El día 29 de septiembre de 1776, en ef Real Coliseo de México, se estrenó un nuevo músico cantor gachupín llamado don..., hijo de la ciudad de..., y fue en domingo.

((Octubre de *1776*

El día 3 de este mes en México, se repicó por aviso de España, y en éste vino noticia de la llegada a Veracruz del caballero Croix, y fue en jueves.

El día 9 de octubre de 1776 en México, sacaron de la cárcel de Corte a dos mujeres y un hombre por alcahuetes; pero sólo una mujer salió emplumada, y los llevaron por las calles acostumbradas y después en un tablado que se había puesto'en la Plaza, enfrente de la cárcel, los sentaron y los tuvieron hasta la una y media del día, y no los hubieran quitado hasta las tres de la tarde, si no hubiera sido que empezó a llover; de forma que fue el escándalo en México, el mayor que se ha visto, pues nunca se ha puesto tablado para semejante cosa. Los nombres de éstos son los siguientes: la emplumada se llamaba María Manuela Cortés, alias La Grilla, la otra, María Jesús Barrera, y el hombre, que era un negro..., alias Cantaloro, y fue en miércoles.

Nota

Adviértese, que esta emplumada y la otra y el negro, fueron los últimos que sentenciaron el señor Acevedo y el señor Cistué, que al otro día pasaron de oidores.

I

El día 10 de octubre de 1776 en México, en el real acuerdo, en Palacio, tomaron posesión de oidores los señores don Miguel Calixto Acevedo y don José Cistué, siendo virrey el señor don frey Antonio María de Bucareli y Ur- súa, en jueves.

El día 22 de octubre de 1776 en México, en el Real Palacio, se extinguió el Tribunal de Alcabalas por orden de Su Majestad, y era contador interino de este tribunal don Juan Manuel Ramírez, quien lo entregó al superintendente

Diario de sucesos de México • SI

de la Real Aduana don Miguel Páez y a don Felipe Cler, contador de dicha aduana, siendo martes.

El día 30 de octubre de 1776 en México, en el Sagrario de la Santa Catedral, junto a la puerta del costado que mira al Arzobispado, se puso un cuadro de Nuestra Señora de Guadalupe con los patrones de los temblores, para que Su Divina Majestad nos libre de otros como los que hubo el día 24 de abril de este año, siendo arzobispo el señor don Alonso Núñez de Haro, en miércoles.

El día 31 de octubre en el Real Palacio, se presentó don Pedro Toral Valdés al señor virrey Bucareli, con todos los oficiales de las Reales Cajas con sus uniformes que los estrenaron este día, y fue la primera vez que se los pusieron; y file en jueves.

El día 4 de este mes en México, en el Real Palacio, el señor virrey Bucareli dio el bastón de capitán a un indio meco, y por bien le hizo poner un vestido de uniforme azul con vuelta encarnada y la chupa galoneada de oro. Este indio se llamaba el capitán Palma, no tenía otro nombre porque no era cristiano. No se sabe cuándo se bautizará. Todo esto fue en lunes, día de San Carlos. Este mismo día se estrenó la Casa de las Mujeres Pobres, siendo rector de ella el señor doctor don Gregorio Valdés. Igualmente este día, en el Real Palacio, se presentó al señor virrey una mujer vestida de hombre para que le dieran conveniencia a su marido, que era un teniente de Inválidos, y fue en lunes. Este mismo día también, en México, bajando el Puente de la Merced en una casa, una mujer metió a un mozo que decían ser su amigo, y a las pocas horas lo hallaron ahogado. Se enterró en el Sagrario el día 5 y se llamaba Rosas Corredor.

El día 15 de noviembre de 1776 en México, sacaron de la cárcel de la Acordada seis hombres, dándoles doscientos azotes por macutenos, y fiie en viernes.

Nota

El día 4 de octubre de 1776, salió de esta Corte de México el capitán don Francisco Ariztimuño, a la jurisdicción de Tampico a coger en descamino unas embarcaciones extranjeras por orden del señor virrey, y el día 8 de noviembre del mismo año, murió en un pueblo llamádose..., de la misma jurisdicción. El día 16

32 • José Gómez

de este mes llegó la noticia a México. Este caballero era capitán de la Acordada y fue juez de Bebidas Prohibidas. El día 18 de dicho mes y año se hicieron sus honras en el convento de San Femando, en donde está enterrado su antecesor el señor don Jacinto Martínez de la Concha.

El día 21 de noviembre de 1776, entró en México el aviso de España en que le vino al señor deán don Juan Ignacio de la Rocha, la Mitra de Valladolid, y a don Jacinto Sierra Niño, la Capitanía, y otras novedades, y (lie en jueves.

El día 24 de noviembre en la Santa Catedral de México y en todas las demás iglesias, se publicó por edicto el año santo, para que empezara el día 1Q de diciembre del mismo año, y se nombraron cuatro iglesias que fueron la Santa Catedral, Santo Domingo, San Francisco y San José el Real de la Casa Profesa, que era de los jesuítas, y fiie en domingo.

El día 28 de noviembre de 1776 en México, sacaron de la cárcel de la Acordada cinco hombres para ahorcarlos, cuyos nombres son los siguientes: Andrés Reyna, José Antonio Bonilla, José Fernando Maldonado, José Lázaro Sierra y José Guadalupe Maldonado. Este último había de ser el primero de los ahorcados, y por haberse estado al pie de la horca en dos distintas partes reconciliándose hora y media, fue el último, y según su preparación y buenos modos que tuvo, dio muy buenas muestras de su salvación, y así éste y su hermano José Fernando, eran poblanos y habían sido soldados dragones del Regimiento de México, y fue la primera justicia que hizo siendo juez y no capitán (por estar vaca la plaza por muerte del capitán don Francisco Ariztimuño), el licenciado don Juan José Barberi, y fue en jueves.

El día 1Q de este mes en México, se empezó el año santo por el término de seis meses que se acabará el 1Q de junio de 1777.

El día 11 y 12 de diciembre de 1776 en México, se echaron repiques generales de campanas en todas las iglesias. En Catedral se usaron las esquilas del rey, y se iluminaron las calles y cortinas en todas las ventanas. Todo esto Ríe por cédula de Su Majestad, siendo la primera vez que en día y víspera de Nuestra Señora de Guadalupe se ha repicado con las esquilas del rey, y Ríe siendo arzobispo el señor don Alonso Núñez de Haro y virrey el señor don frey Antonio María de Bucareli y Ursúa, en miércoles y jueves.

Diario de sucesos de México • 33

El día 15 de diciembre de 1776 en México, pasaron a Nuestra Señora de la Soledad de Santa Cruz al convento de religiosas de Jesús María, porque estaban componiendo su iglesia, y fue en miércoles.

El día 16 de diciembre de 1776 en México, se publicó un bando real para el indulto de los desertores de todos los regimientos, y fue una Compañía de Granaderos del Regimiento de Granada, otra Compañía de Dragones del Regimiento de México y todos los tambores, en lunes.

El día 19 de diciembre de 1776 en México, salió el señor arzobispo don Alonso Núñez de Haro con el Cabildo eclesiástico a andar las estaciones por el año santo, y fue en jueves.

El día 22 de diciembre de 1776, entró en esta ciudad de México el señor don Teodoro de Croix, caballero que venía de España para comandante de las tropas de tierradentro.

El día 31 de diciembre de 1776 en México, en el Real Palacio, en presencia del señor virrey don frey Antonio María de Bucareli, y del secretario de Gobierno don José Gorráes, hizo juramento de obispo de Valladolid el señor don Juan Ignacio de la Rocha, deán de esta Santa Iglesia de México, en martes.

Enero

El día le de este mes en México, salieron de alcaldes ordinarios, de primer voto, don Rafael Monterde, conde de la Presa de Jalpa, y de segundo, don Juan Bautista Fagoaga, en miércoles.

El día 5 de enero de 1777 en México, a la una de la noche, murió don Cristóbal Olivares, segundo barba del Coliseo, padre de la primera dama. Su muerte fue de repente. El día 3, este señor hizo el papel de gobernador de Lúea en la comedia del Diablo pudicador, murió en domingo.

El día 12 de enero de 1777 en México, llevaron en procesión a Nuestra Señora de la Soledad de Santa Cruz a su casa, desde el convento de religiosas de Jesús María, en donde estaba, y fue en domingo.

El día 20 de enero de 1777 en México, se estrenó el Hospital de los Locos en San Hipólito, y fue a verlo el señor virrey en lunes. Y este mismo día se estrenó en el Coliseo una tragedia nueva intitulada: Sesostre, rey de Egipto, con motivo de los años de nuestro católico monarca el señor don Carlos III.

El día 22 de enero de 1777 en México, entró el aviso de España con la noticia de los nombramientos de regente de esta Real Audiencia al señor don Francisco Romá y Rosell, chanciller de Valladoiid; al señor don Ensebio Sánchez Pareja, de Guadalajara, y al señor don Vicente de Herrera, de Guatemala. En este aviso vino también la noticia de la muda de los soldados de Granada a Veracmz, y al virrey Bucareli el aumento de su sueldo con veinte mil pesos, que con sesenta que tenía, ahora son ochenta mil.

El día 25 de enero de 1777 en México, en el oratorio de San Felipe Neri, murió el doctor don Pedro de Arizpe, prepósito que era en la actualidad. El día 27 por la mañana fue su entierro, de los mejores que he visto, su cortejo anduvo cuatro cuadras, una en la calle del Espíritu Santo, otra en la calle de la Acequia, otra en la de la Palma, y otra en la calle de San Francisco. Su muerte fue en sábado y su entierro en lunes.

El 1Q de este mes en México, en la Santa Iglesia Catedral, se hicieron las honras del padre del señor arzobispo don Alonso Núñez de Haro. Llamábase el difunto don García Núñez de Haro, y fueron a sus honras todos los tribunales. El señor virrey no asistió por estar ocupado con el correo de

España, y fue en sábado.

El día 13 de febrero, en el Sagrario de la Santa Iglesia Catedral de México, se bautizaron cinco indios mecos, y entre ellos uno que era el capitán Palma al que le pusieron el nombre de Carlos, y fiie su padrino el virrey, y fue en jueves.

El día 4 de este mes en México, en acuerdo del Real Palacio, tomó posesión de fiscal del Crimen don Francisco Galindo, y fue en martes. Este señor era sordo y para su juramento leyó él mismo.

El día 5 de marzo de 1777, salió de esta ciudad de México para el puerto de Acapulco, el señor visitador del Reino del Peni, don José Antonio de Are- che. Este señor había sido en esta ciudad, fiscal del Crimen y del rey.

Diario de sucesos de México • 35

El día 9 de marzo de 1777 en México, salió la última tropa del Regimiento de Granada, y ese mismo día entraron los primeros milicianos de la Corona, y era domingo.

El día 11 de marzo de 1777 en México, salieron la Real Audiencia y el señor virrey a andar las estaciones para ganar el año santo, y fue en martes y Ríe toda la Guardia de Alabarderos.

El día 12 de marzo de 1777 en México, en el Sagrario, se confirmó y se le pusieron los santos óleos a la hija del señor don Francisco Viana, oidor que era de esta Real Audiencia y pasaba a Madrid de consejero de Indias. Una y otra cosa lo hizo el señor arzobispo de México don Alonso Núñez de Haro, y fiie su padrino el señor don Francisco Marcelo Pablo, su bisabuelo, y se le puso el nombre de María, y fue en miércoles.

El día 13 de marzo de 1777 en México, sacaron de la cárcel de la Acordada cuatro hombres para ahorcarlos y cuatro mujeres a la vergüenza, por cómplices en los delitos de éstos, y fue juez interino don Juan Barberi, y fiie en jueves

El día 22 de marzo de 1777 en México, murió don Juan de Ochoa de 81 años de edad, alabardero, el más antiguo. Tenía en esta plaza 56 años, dos meses y seis días, y conoció 14 virreyes, siendo el último el señor don frey Antonio María de Bucareli. Se enterró en el Sagrario de la Santa Iglesia Catedral en domingo de ramos.

El día 28 de marzo de 1777 en México, salió del Sagrario de la Santa Iglesia Catedral la procesión del Señor de las Tres Caídas, y fue el primer año que salió de esta iglesia, porque estaba en San Francisco en la capilla del Señor San José. Cuando entraron los montañeses en dicha capilla, lo pasaron al Sagrario, y fue dicha procesión en viernes santo.

El día 30 de marzo de 1777, entró aviso de España y no pasó más novedad que el ascenso del señor Becerra y del señor Arrangoitia a oidores, y fue en domingo de Pascua de Resurrección. Este día, en el Real Palacio, hubo acuerdo de los señores oidores para definir el punto sobre el alboroto que habían tenido los padres agonizantes con su superior, de los que cuatro debían ser descomulgados, y fue menos, porque fue el señor arzobispo de México don Alonso Núñez de Haro a levantar la descomunión a San Francisco, en donde estaban retraídos.

OÍbril de 1777

El día 3 de este mes en México, en el convento de San Agustín y en la capilla de Nuestra Señora de la Concepción de los Alabarderos, se enterró a don José Velasco, dependiente de azogues y bienhechor de dicha capilla, y era mayordomo de esta capilla don Francisco del Villar, y sacristán yo, José Gómez, y se enterró en jueves.

El día 4 de abril de 1777, salió de México el señor don Juan Ignacio de la Rocha, electo obispo de Valladolid, para su Obispado de obispo gobernador, por no estar consagrado y no haberle venido las bulas sino la gracia de Su Majestad, y iue en viernes.

El día 10 de abril de 1777, salió de esta ciudad de México para el puerto de Veracruz y de allí para España, el señor don Francisco Viana, que iba de consejero de Indias, y llevó a su mujer y a toda su familia, y fue en viernes.

El día 21 de abril de 1777, en esta ciudad de México, en las más de las iglesias estuvo Su Majestad patente y hubo colgaduras en todas las calles y no hubo comedia en hacimiento de gracias por hacer un año que experimentó esta ciudad los grandes terremotos, y en día 20, domingo, hubo en Catedral una procesión en que salió nuestra Señora de Guadalupe, San Felipe de Jesús y el Señor San José, todo en recuerdo del 21 fatal del año pasado de 1776.

Este mismo día en el Sagrario de México, cantó su misa nueva don José Paredes, músico que era de Catedral, y hubo una asistencia muy grande, y Rieron sus padrinos los señores canónigos Torres y Chabestre, y Ríe en lunes.

El día 22 de este mes en México, en el real acuerdo, tomó posesión de oidor el señor don Ramón Becerra, que era alcalde de Corte en esta ciudad. Y este día se estrenó de chanciller y fue a la primera posesión a que asistió don José Jáuregui, y fue en jueves.

Diario de sucesos de México • 37

El día 29 de mayo de 1777 en México, día de Corpus, Ríe la primera salida pública en que salió el chanciller don José Jáuregui, y no le dieron su lugar por estar el regente del Tribunal de Cuentas don Juan Crisóstomo Ix- barrueta, con que se está siguiendo el punto, siendo virrey el señor don frey Antonio María de Bucareli y Ursúa.

\Junio de 1777

El día 18 de este mes en México, sacaron de la cárcel de Corte a un hombre para ahorcarlo por homicidio, y este día al tiempo que lo iban a ahorcar se soltó un aguacero disforme, y fue en miércoles.

El día 19 de junio de 1777 en México, sacaron de la cárcel de la Acordada seis hombres, dándoles 200 azotes, en jueves.

El día 22 de junio de 1777 en México, entró el general de la flota don Antonio Ulloa, y vino a parar a Palacio por ser el señor virrey Bucareli muy amigo suyo, y flie en domingo. Y este día murió en México el señor doctor don Manuel Barrientes, arcediano de esta santa iglesia, y se enterró el día 23 por la tarde.

El día 23 de junio de 1777 en México, tomó posesión de oidor en el real acuerdo el señor don Domingo Arrangoitia, y este mismo día, tomó posesión también de fiscal, el señor don Baltasar Ladrón de Guevara, y no asistió el señor virrey, y fue la primera vez que se sentó el chanciller Jáuregui.

El día 29 de junio, entraron en el puerto de Veracruz el navio de guerra San Julián y cuatro mercantes con azogue; en éstos vinieron el Regimiento de Asturias y otros muchos pasajeros. Tal noticia llegó a México el día 2 de julio.

El día 4 de este mes en México, en el real acuerdo, tomó posesión de alcalde de Corte don Ruperto Luyando, y asistió el señor virrey, en viernes.

El día 15 de julio de 1777 en México, se repicó por aviso de España, y en éste vino la noticia del nombramiento de obispo del Nuevo Reino de León al padre fray Antonio de Jesús Sacedón, guardián que acabó en el convento de religiosos de San Diego de Pachuca, y es el primero que va a este Obispado porque fue creado nuevo.

38 • José Gómez

El día 17 de julio de 1777 en México, en el real acuerdo en Palacio, tomó posesión de alcalde de Corte el señor don Cosme de Micr y Trespala- cios, y este señor no pagó media anata por haberse creado esta plaza nuevamente, y asistió el señor virrey, y fue en jueves.

El día 19 de julio de 1777 en México, se enterró en el convento de San Francisco a don Francisco Marcelo Pablo, caballero de la Orden de Calatrava y marqués de Prado Hernioso, en sábado.

El día 21 de julio de 1777 en México, sacaron de la cárcel de la Acordada dos hombres para ahorcarlos, en lunes. Y este día en Palacio, en el real acuerdo, tomó posesión de alcalde de Corte el señor don Simón Antonio de Mirafuentes, y asistió el señor virrey.

El día 22 de julio de 1777 en México, murió la marquesa de la Colina, en maltes.

El día 2 de este mes en México, se repicó por aviso de España, y éste trajo la feliz noticia de la toma de la isla de Santa Catalina en Buenos Aires por el señor don Pedro Ceballos.

El día 3 fue la misa de gracias muy solemne con Te Dcnm y mucho repique de esquilas, y asistió el señor virrey.

Nota

Dicha isla de Santa Catalina era de los portugueses»

El día 4 de agosto de 1777, salió de esta ciudad de México el caballero don Teodoro de Croix, para comandante general de las tropas de Tierradcn- tro en la Sonora, en lunes.

El día 6 de agosto de 1777 en México, en la Santa Iglesia Catedral, salieron cien hijos huérfanos correspondientes al Salvador, que era en la Casa Profesa, que había diez años que no salían desde la expulsión de los jesuítas, y fiie en miércoles.

El día 11 de agosto de 1777 en México, murió la señora marquesa de Guardiola doña María Manuela de Nájera, y el día 12 se enterró en el convento de San Francisco.

Diario de sucesos de México • 39

El día 12 de agosto de 1777 en México, se estrenó la media naranja del convento de San Hipólito.

El día 26 de agosto de 1777 en México, se hizo en el Real Coliseo una comedia cuyo título fue: El príncipe tonto. Esta fue de balde, sin paga ninguna, a obsequio de la Serenísima Princesa de Asturias, cuyos dias fueron el 25, cosa que nunca se había visto en esta Corte, siendo virrey el señor Bucareli y administrador del Real Coliseo don Juan de San Vicente.

El día 28 de agosto de 1777 en México, se estrenó en el convento de San Agustín la lámpara que está en la capilla mayor.

^eptiembre de 1777

El día 2 de este mes en México, en el Real Palacio, se empezó a decir misa todos los días de trabajo en la capilla real, por mandado de los señores oidores de la Reai Audiencia, siendo capellán don Agustín de la Peña.

El día 5 de septiembre de 1777 en México, se repicó por aviso de España, y en éste vino la noticia del ascenso que Su Majestad había hecho a don Pedro Ceballos, nombrándolo capitán general de Ejércitos. El día 6 fue la misa de gracias, y este día fue el primero en que el chanciller don José Jáuregui se sentó en su lugar en Catedral, que es junto al fiscal del Crimen.

El día 7 de septiembre de 1777 en México, se pasaron las mujeres retraídas que estaban en las parroquias de Santa Catalina y de San Miguel a la iglesia y parroquia de Santa María la Redonda.

El día 14 de septiembre de 1777, en el Real Coliseo de México, hubo una etiqueta con el oficial de la guardia de la Corona, don Francisco Parra, y la señora inspectora, mujer del señor inspector don Pascual de Cisneros, sobre si había un músico decente o no, y se vio el Coliseo en punto de haber motín, pero el oficial de guardia excedió su derecho por la señora inspectora, y don Francisco Cañaveral, capitán de Dragones de España, salió en defensa de dicha señora y ultrajó al oficial de la guardia; de forma que el lance estuvo muy malo, y lúe siendo virrey el señor Bucareli y administrador del Coliseo don Juan de San Vicente, y fríe en domingo.

El día 18 de septiembre de 1777, salió de esta ciudad de México para Veracruz el señor don Antonio Ulloa, general de la flota, que estuvo dos

*

meses en este Real Palacio. Y este día se echó bando para que los panaderos volviesen a poner el pan en sus casas que estaban en todas las esquinas.

El día 19 de septiembre de 1777 en México, a las tres de la mañana, se quemó la chocolatería de la calle del Espíritu Santo, que no quedó señal de nada, y se tocó a fuego en todas las iglesias de esta ciudad, y fue en viernes.

El día 21 de septiembre de 1777 en México, se puso una culebra de agua muy fuerte, de forma que amenazó a esta ciudad una ruina muy grande, y en todas las iglesias se hizo rogación, y en el convento de Santo Domingo y en otros se puso el Divinísimo patente; todos los sacerdotes la conjuraron y fue Dios servido que fuera a descargar a otra parte, siendo domingo, a las cuatro de la tarde.

El día 24 de septiembre de 1777 en México, en el Real Palacio, empezó uno de los relojes a andar, que hacía doce años que no andaba, siendo virrey el señor Bucareli, en miércoles.

El día 28 de septiembre de 1777 en México, se estrenó la iglesia de San Bernardo, esto es, la media naranja, y este día hubo procesión con el Santísimo Sacramento por la calle, y sacó a Su Majestad el señor provisor don José Conejares, y seis alabarderos llevaron el palio, y fue en domingo.

El día 29 de septiembre de 1777 en México, fue la dedicación de la iglesia de San Bernardo, y asistió este día y el anterior el señor marqués de Jaral de Berrio, don Miguel de Berrio, como patrón de dicha iglesia, y fue en lunes, día del Señor San Miguel.

(jOctubre de 1777

i

El día 5 de este mes en México, entró el sdñor asesor general del Virreinato don Miguel Bataller, en domingo.

El día 6 de octubre de 1777 en México, se publicó la residencia del señor don Francisco de Viana, conde de Tecpan, que era oidor de esta Real Audiencia y pasó a España al Consejo de Indias. Dicha residencia la hizo don Francisco Galindo, fiscal que era del Crimen de esta real sala.

El día 13 de octubre de 1777 en México, en la Real Audiencia, hizo juramento el señor asesor general del Virreinato don Miguel Bataller, en lunes. Y este día se publicó en México la residencia del señor fiscal que fiic de esta Real Audiencia, don José Antonio de Areche, que pasó al Perú de visitador, y se la hizo don Baltasar Ladrón de Guevara, fiscal de lo Civil actual.

Diario de sucesos de México • 41

El día 15 de octubre de 1777 en México, en el Sagrario de la Santa Iglesia Catedral, se puso el primer pan de oro en el colateral que se está dorando de Nuestra Señora de la Soledad, y fue el padrino don Juan Nepomuccno de I-ara, sacristán de dicho Sagrario, y hubo muchos cohetes y misa de gracias, y fue en miércoles.

El día 17 de octubre de 1777 en México, salieron de la cárcel de la Acordada nueve azotados por las calles.

El día 18 de octubre de 1777 en México, salió la cuerda de presidiarios de todas las cárceles. Entre ellos salieron unos que habían fingido ronda, los cuales llevaban en los sombreros unos rótulos para que dieran conocidos, con pena de que si se los quitaban, tendrían dos años más de presidio, y ftie en sábado.

El día 20 de octubre de 1777 en México, murió el señor don Francisco Larrea, gobernador que era del estado y marquesado del Valle de Oaxaca, y el día 21 se enterró en la iglesia del Hospital de Jesús Nazareno, y fue el primer gobernador que se enterró en dicha iglesia.

El día 22 de octubre de 1777 en México, sacaron de la cárcel de Abajo un hombre a la vergüenza por las calles públicas, dándole 200 azotes por ladrón de gallinas, y llevaba en el pescuezo dos de éstas colgadas, una negra y una blanca, y lo sacó don José Troncoso, escribano, en miércoles.

El día 28 de octubre de 1777 en México, salió su Divina Majestad de la parroquia de Santa Ana en procesión general con todas las cofradías, para colocarlo en Nuestra Señora de los Angeles, y lo sacó el señor provisor don José Conejares, en martes.

El día 29 de octubre de 1777 en México, entró el aviso de España, y en éste le vino al señor don Domingo Balcázar la noticia de su designación de camarista con iiustrísimo, en miércoles.

El día 4 de este mes en México, estrenó el Regimiento de la Corona su divisa en .el cuello; los oficiales un galoncito de plata y los soldados de hilo, en días de nuestro católico monarca, en martes. Y este día salió de esta ciudad para Guatemala, a donde iba de regente, el señor don Vicente de Herrera, oidor que había sido de esta Real Audiencia.

El día 13 de noviembre de 1777 en México, se publicó la residencia del señor don Eusebio Sánchez Pareja, oidor que fue de esta Real Audiencia y pasó de regente a la de Guadalajara.

El día 14 de noviembre de 1777 en México, fueron las honras militares en la Santa Iglesia Catedral, y asistió el señor virrey don frey Antonio María de Bucareli, que entró por la puerta del Empedradillo, y predicó el magistral que lo era el señor doctor don José Serrato, en vieriics.

El día 16 de noviembre de 1777 en México, se repicó por aviso de España, y en éste vino la novedad del deán nuevo de esta Santa Iglesia Catedral, don Gregorio Miollo.

El día 30 de noviembre de 1777 en México, se publicó la Bula de la Santa Cruzada por el comisario señor don Gregorio de Omaña, y fue el primer año que empezó. Y este día en el convento de San Agustín, en la capilla de los Alabarderos, estrenó Nuestra Señora de la Concepción una vidriera nueva y un contramarco de brillantes nuevo, y fue siendo mayordomo don Francisco Villar y sacristán don José Gómez.

El día 5 de este mes en México, cogió el señor alcalde de Corte don Ruperto Luyando a don José Contreras, soldado alabardero, con un cuchillo, y lo llevó a la cárcel de Corte, siendo así que no correspondía que lo hubiese llevado sino a su cuerpo de guardia, y el capitán de este regimiento don Mariano Vclasco, no lo supo defender con el virrey, y se mantuvo en la cárcel hasta el día...

El día 19 de diciembre de 1777 en México, sacaron emplumados de la cárcel de Corte a un hombre y a una mujer por alcahuetes. En la puerta de la cárcel se instaló un tablado en donde los pusieron después de haberlos paseado por las calles acostumbradas, y eran marido y mujer y se llamaba el hombre Blas Vargas Machuca, alias El Torote, y la mujer, Manuela Veiázquez, en viernes.

El día 20 de diciembre de 1777 en México, sacaron de la cárcel de Corte a un hombre llamado don Antonio Miguel de los Ríos, a ponerlo en un tablado que está hecho en la puerta de dicha cárcel, y tenía una corona en la cabeza en que decía, por falsario a la Real Audiencia, y fue en sábado.

Diario de sucesos de México • 43

El día 24 de diciembre de 1777 en México, se acabó el colateral de la puerta de costado del Sagrario de la Catedral que cae al Arzobispado, en miércoles.

El día 29 de diciembre de 1777 en México, se repicó por aviso de España, y en éste vino la noticia del parto de la princesa de Asturias, que parió una infanta que se llamó doña María Luisa y otros varios nombres. Y en este aviso vinieron varias novedades, no de mucha consecuencia, y fue en lunes.

Nota

El día 29 de diciembre en México, habiendo venido en el aviso de España la orden de que se aprehendiera la persona de don Juan Antonio Bernabeo, mandó el señor virrey a llamar al mayor de la Plaza don Pedro Garibay, para dicha prisión, y éste se la encargó a su ayudante don Antonio Reina, el que pasó a casa del delincuente y lo amonestó de parte del señor virrey, que se diese preso, el cual respondió que obedecía y que sólo lo dejase recoger los papeles que tenía en su cuarto, y el dicho ayudante se lo concedió, y entrándose en una pieza que tenía salida al traspatio, se montó en un caballo y se huyó, dejando al ayudante cargado. Dicho caballero terna el delito de haber traído unas reales órdenes falsas de su capitán de Guardias Españolas, y vestía su uniforme y había cobrado de estas cajas reales el sueldo de tal capitán. Con que hasta hoy día 31 del mes de diciembre de 1777, no se ha encontrado su estancia, haciendo varias diligencias de su busca. En adelante diré más, si se sabe su paradero.

El día Io de este mes, salieron de alcaldes ordinarios de México el señor conde del Valle de Orizaba, y de segundo voto el señor Bocanegra, en jueves.

El día 7 de enero de 1778 en México, cogieron los comisarios de Barberi en el Hospital de las Locas a don Juan Antonio Bernabeo, y lo llevaron al Cuartel de la Corona en donde está con dos centinelas de vista, en miércoles.

El día 8 de enero de 1778 en México, en el real acuerdo, tomó posesión de alcalde de Corte el señor don Eusebio Beleña, en jueves.

El día 10 de enero de 1778 en México, entró el correo de España, y en éste le vino a don Juan de la Riva la contaduría de Tributos, en sábado.

• 44 •

El día 16 de enero de 1778, salió del pucito de Vcracruz la flota al mando de don Antonio Ulloa, y llevaba en plata y en efectos veintidós y medio millones de pesos, siendo virrey el señor Bucareli, y salió en viernes.

El día 17 de enero de 1778 en México, se publicó bando para que en esta Corte se pusieran tres días de luminarias y cortinas por el parto de la señora princesa de Asturias, que fueron 19, 20 y 21. Y el día 20 hubo en la Santa Iglesia Catedral una misa de gracias de pontifical, que la ofició el señor arzobispo don Alonso Núñez de Haro, a la que asistieron todos los tribunales, el señor virrey y el señor obispo de Valladolid don Juan Ignacio de la Rocha, y fue con repiques de esquilas general en todas las iglesias, en martes.

El día 18 de enero de 1778 en México, en la Santa Iglesia Catedral, se consagró de obispo el señor don Juan Ignacio de la Rocha, que era deán de ella y ahora obispo de Valladolid, y lo consagró el señor arzobispo de México don Alonso Núñez de Haro, y fueron de mitra los señores don Cayetano y don Luis de Torres, dignidades de esta santa iglesia, y asistieron todos los tribunales y el señor virrey Bucareli. Regaló dicho señor obispo a la iglesia dos incensarios con su naveta de oro. Todo esto fue en domingo, día del Dulce Nombre de Jesús.

El día 23 de enero de 1778 en México, en el convento de los padres betlemitas, hizo el señor obispo de Valladolid una fundón de convite al señor arzobispo de México, muy especial, por ser día de su santo, en viernes. Y este día se publicó el bando para la venida de Nuestra Señora de los Remedios por el feliz viaje de la flota mandada por el señor don Antonio Ulloa.

El día 24 de enero de 1778, llegó Su Majestad la Virgen de los Remedios a la Sanfa Veracruz, y el día 25 vino en procesión general a la Santa Iglesia Catedral, en domingo.

El día 31 de enero de 1778 en México, en el Sagrario de ia Santa Iglesia Catedral, se puso el último pan de oro en el colateral de Nuestra Señora de los Dolores, en sábado.

El día le de este mes en México, en el convento de las madres de la Enseñanza, se bendijo la iglesia nueva, y la bendijo el señor arzobispo don Alonso Núñez de Haro, en domingo.

El día 2 de febrero de 1778 en México, en el convento de las madres de

Diario de sucesos de México • 45

la Enseñanza, se colocó en la iglesia nueva el Santísimo Sacramento que pasó el señor provisor don José Conejares, en lunes.

El día 3 de febrero de 1778 en México, fue la dedicación de la iglesia nueva de las madres de la Enseñanza, y la dedicó el señor arzobispo don Alonso Núñez de Haro, quien ofició la misa de pontifical. El señor canónigo don Valentín García Narro, fue el expositor del evangelio; el de epístola fue el señor canónigo don José Ulibarre, y el del sermón el señor maestre de Escuelas don Cayetano de Torres, y fue en martes. Y este día se acabó la novena de Nuestra Señora de los Remedios que vino por la flota, y a la tarde se la llevaron en procesión general hasta la Santa Veracruz, y asistieron los tribunales y el señor virrey Bucareli.

El día 7 de febrero de 1778, salió de México el señor don José Cistué, oidor que era de esta Real Audiencia, para fiscal del Consejo de Indias en la Corte de Madrid, en sábado.

El día 10 de febrero de 1778, en el convento de San Francisco, se juntaron todos los tribunales con el señor arzobispo de México don Alonso Núñez de Haro, el señor obispo de Valladolid don Ignacio de la Rocha, el señor obispo electo del Nuevo Reino de León don fray Antonio de Sacedón y los señores inquisidores, para sacar el cuerpo del padre fray Antonio Margil de Jesús y hacer inspección de él para su beatificación, con juramento y excomunión mayor para que ninguno pudiese decir nada de lo visto, de forma que concurrió lo mejor de México, menos el señor virrey Bucareli, que esta tarde se fiie a Tacubaya a la prueba de unos cañones, lo que todos se lo tuvieron a mal y fue en martes.

El día 12 de febrero de 1778 en México, en el Santuario de Nuestra Señora de Guadalupe, se empezaron a abrir los cimientos para el camarín, y fueron los primeros que cavaron el señor don Juan Manuel Lorenzo Gutiérrez Altamirano Vclasco, conde de Santiago, y don Miguel de Berrio, conde de San Mateo de Valparaíso, y otros muchos caballeros distinguidos de esta nobilísima ciudad, siendo virrey el señor don frey Antonio María de Bucareli, arzobispo de México el señor don Alonso Núñez de Haro, y abad del Santuario don José Félix Colorado, y lúe en jueves por la tarde.

El día 15 de febrero de 1778 en México, entró la Primera Compañía del Regimiento de Asturias, y vino en derechura a entrar de guardia a Palacio, y se llamaba el capitán don Santiago Valdés de Gracial, y el teniente don Joaquín de Puzas y el alférez don Domingo Montaño, y fue en domingo.

El día 16 de febrero de 1778, entró en México el Regimiento de Asturias con su coronel, don... Duque, en lunes.

El día 19 de febrero de 1778 en México, se despidió el señor don Domingo Balcázar de la Real Audiencia y de la Sala del Crimen. Era decano de la Audiencia y le vino su retiro con todo su sueldo y tratamiento de ilustrísimo, en jueves.

El día 23 de febrero de 1778 en México, en el Sagrario de la Santa Iglesia Catedral, se bendijo el colateral de Nuestra Señora de los Dolores, y lo bendijo el padre don Felipe Villarido, cura de dicho Sagrario, en lunes.

El día 24 de febrero de 1778, en el Sagrario de la Santa Iglesia Catedral de México, se celebró la fiesta del estreno del colateral de Nuestra Señora de los Dolores, y dijo la misa el señor cura mayor don Alonso Cas- telló, y el sermón, el padre don Joaquín Campa, capellán general de los milicianos, en martes.

El día 25 de febrero de 1778 en México, tomó posesión de contador general de Tributos, don Juan de la Riva, en miércoles.

El día 26 de febrero de 1778, salió de esta ciudad de México el señor don..., regente que iba para la Audiencia de Manila, el jueves.

^ 'y) (arzo de 1778 .

El día 13 de este mes, entró a México con el nombramiento de primer regente para esta Real Audiencia, el señor don Francisco Romá y Roscll, que vino de España, y fue al Santuario de Nuestra Señora de Guadalupe por su señoría el señor don Antonio Villaurrutia, que era decano de la Audiencia, y por el señor don Dicqo Fernández de Lamadrid, que era subdecano. Y entró en viernes en la tarde y vino derecho a Palacio a ver al señor virrey.

El día 16 de marzo de 1778 en México, en el real acuerdo en Palacio, tomó posesión el señor regente don Francisco Romá y Rosell en presencia del virrey y oidores, y se diferenció de los demás en que la tomó sentado al lado diestro del virrey, y el misal y el Santo Cristo los tenía delante. Y después no se abrazaron como se acostumbra con los demás oidores, y este mismo día tomó posesión en la Audiencia y en la Sala dei Criiqen, y el primer pliego que le mandó el virrey se lo llevé yo, José Gómez, y toda esta función fue en lunes.

El día 21 de marzo de 1778 en México, en el cuartel de Tepexpa, en donde estaba el Regimiento de Asturias, amaneció en que se echó menos a don

Diario de sucesos de México • 47

Juan Bernabeo que estaba preso en dicho cuartel, por lo que luego luego dio orden el señor virrey al capitán de la Acordada, don Juan Barberi, que salieran a buscarlo, y el día 22 del mismo mes lo cogieron en el pueblo de San Ángel y lo trajeron preso a la cárcel de la Acordada.

El día 22 de marzo de 1778 en México, en el convento de Santo Domingo, hubo un auto de fe en que salieron siete penitenciados, todos hombres, por varios asuntos tocantes a nuestra santa fe, pero el último que era un negro manco de la mano derecha, fue el más perverso y malvado de todos, y fiie en domingo.

El día 23 de marzo de 1778 en México, se repicó por aviso de España, y en éste le vino ai señor don Luis de Torres la dignidad de arcediano de esta Santa Iglesia Catedral, y al señor don José Leonardo Terraya, la chantría, y fiic en lunes.

El día 30 de marzo de 1778 en México, sacaron de la cárcel de la Acordada cinco hombres para ajusticiarlos, tres dado garrote y dos ahorcados. El primero a que dieron garrote era un indio alobado y manco, y a la mujer de éste la azotaron con otros cinco hombres, siendo capitán interino de dicha Acordada, don Juan Barberi, en lunes.

El día 2 de este mes en México, en la Catedral, tomaron posesión el señor don Luis de Torres, de arcediano, y el señor don José Leonardo de Terraya, de chantre, en jueves.

El día 4 de abril de 1778 en México, en el Real Palacio, asistió el regente don Francisco Romá y Rosell a su primera junta, en sábado.

El día 7 de abril de 1778 en México, en el Real Palacio, tomó posesión de alcalde de Corte honorario el señor don Joaquín Velázquez de León, y no asistió su Excelencia el señor virrey, ni el señor regente, por estar ocupados en una junta de temporalidades en que estaba el señor arzobispo, y sucedió que se olvidó la cédula y fue menester ir por ella después de estar en acuerdo, y era oidor decano el señor don Antonio Villaurrutia, y fue en martes.

El día 11 de abril de 1778 en México, se publicó bando por el señor virrey para que en toda la Semana Santa no hubiera chía ni dulceros en el tránsito de las procesiones, y fue en sábado.

El día 13 de abril de 1778 en México, sacaron los retraídos de las iglesias de Santa Catarina y de San Miguel. A los hombres los llevaron a la cárcel de Corte, y a las mujeres a la cárcel del Arzobispado, y fueron dos compañías de soldados, una de infantería del Regimiento de Asturias y otra de caballería del de Dragones de España, y dos alcaldes de Corte, el señor don Simón de Mirafuentes y el señor don Eusebio Beleña, y el señor provisor don José Conejares, y fue en Lunes Santo a las cuatro de la mañana.

El día 14 de abril de 1778 en México, cayó malo don Domingo Pérez Tejada, cabo de Escuadra de Alabarderos, y fue en Martes Santo.

El día 18 de abril de 1778, fue la primera salida a que asistió a Catedral el señor regente don Francisco Romá y Rosell, y se le puso su asiento casi en donde se pone el del señor virrey, mirando al altar mayor, y su cojín a los pies, y fue en Sábado de Gloria. Y este día en México, a la una y media de la noche, murió don Domingo Pérez Tejada, cabo de Alabarderos, y el día 19, primer día de pascua de Resurrección, se enterró en el convento de San Agustín y se puso en cámara, siendo virrey el señor Bucareli y capitán de Alabarderos don Mariano de Velasco.

El día 27 de abril de 1778 en México, fue el primer día a que asistió el señor regente a la Real Audiencia, en lunes. Y este día en Palacio en el real acuerdo, tomó posesión de oidor don Ruperto Vicente Luyando, y asistieron el señor virrey y el señor regente.

El día 29 de abril de 1778 en México, en la Real Audiencia, se examinó de abogado don Pedro Fulgencio de Agüero, y fue el primero que se examinó con el señor regente, en miércoles.

Cayo de 1778

El día 1Q de este mes en México, murió dbn Pedro Núñez de Villavicencio, superintendente de la Casa de Moneda y oidor honorario. Murió profeso de felipense y se enterró en la Profesa.

El día 3 de mayo de 1778 en México, en el convento de San Juan de Dios, fue el capítulo y los religiosos tuvieron su discordia y alboroto, de forma que tuvieron que ir dos oidores que fueron el señor don Basilio de Villa- rrasa y el señor don Francisco Gómez de Algarín, en domingo, día de la Santa Cruz.

Diario de sucesos de México * 49

El día 21 de mayo de 1778 en México, en la Catedral, se echó un repique de campanas de una hora por la llegada a Veracruz del señor deán de México, Gregorio Miollo, y a Puebla, el señor don Antonio Villamil, sobrino del señor Tirso Díaz, y fue en jueves.

<'fuñió de 1778

El día 12 de este mes en México, en la Santa Iglesia Catedral, tomó posesión de deán el señor don Gregorio Miollo y Hoyos, siendo arzobispo el señor don Alonso Núñez de Haro, y en esta ocasión estaba Nuestra Señora de los Remedios, que había entrado el día 7 de dicho mes por rogación por las aguas, y fue el día que entró la Virgen y la posesión en viernes. Y este día tomó posesión también de capitán de la Acordada y de juez de Bebidas Prohibidas el señor don Pedro Valiente.

El día 16 de junio de 1778 en México, se acabó la novena de Nuestra Señora de los Remedios y se llevó a Su Majestad en procesión general a la iglesia de la Santa Veracruz, en martes. Y este día dijo la primera misa en Catedral el señor don Gregorio Miollo y Hoyos.

El día 18 de junio de 1778 en México, día de Corpus, fue el primero en que se hizo la ceremonia de bendecir las banderas de los regimientos militares en la procesión. La primera que bendijo el señor arzobispo don Alonso Núñez de Haro, fue la del Regimiento de Asturias, luego la del Regimiento de la Corona, y luego las del Comercio, siendo virrey el señor Bucareli, en jueves.

El día 27 de junio de 1778 en México, llegó el correo de España y en éste le vino orden al señor don Basilio Villarrasa, oidor que era de esta Real Audiencia, que pasara de fiscal a la Contratación de Cádiz. Igualmente vino la noticia de que en Madrid cogieron una junta o congregación de hombres y mujeres con el título de La Bella Unión; que en cuanto a los hombres habla de todas clases con la divisa de una medalla que por un lado tenía el Clarín de la Fama de La Bella Unión, y por el otro el nombre del hombre o mujer. De éstos fueron unos a presidio y otros a las islas, y las mujeres a San Fernando, por sentencia de Su Majestad el señor don Carlos III, que Dios guarde; entró en sábado el aviso.

50 • losé Gómez

»

^f ulio de 1778

El día lfi de este mes en México, en el Real Palacio, salió don Juan de Siles de alabardero y entró de portero a la Secretaría. Es el primero de los alabarderos que bajó de ordenanza a la Secretaría. Y este día fríe don Juan de capote, y fue en miércoles, siendo virrey el señor Bucarcli y su secretario don Melchor de Peramás.

El día 9 de julio de 1778 en México, salieron de la cárcel de la Acordada cinco reos por las calles acostumbradas, cuatro hombres, dándoles 200 azotes, y una mujer a la vergüenza, y estos fueron los primeros que se castigaron en tiempo del señor capitán don Pedro Valiente, y fue en jueves.

El día 11 de julio de 1778 en México, se pusieron unos papelones pardos por todas las esquinas en que citaban a todas las personas de la ciudad, para que en los días 16,17 y 18 se presentasen en la Plazuela de las Vizcaínas, sin saber a lo que era, por lo que se alborotó la ciudad y tuvo el señor virrey que disponer que el día 14 del mismo mes se pusiesen otros papeles en que mandaba que no concurriesen los días señalados hasta nueva orden.

El día 14 de julio de 1778 en México, en la Casa u Hospicio de Pobres, se arrojaron cuatro soldados dragones de España y aporrearon al portero y sacaron doce mujeres, siendo rector de dicho hospicio el señor doctor don Andrés Llanos Valdés, en martes.

El día 30 de julio de 1778, en el Santo Desierto de Padres del Carmen, cayó un rayo y mató a tres religiosos sacerdotes. Uno de ellos era hermano de don Juan de San Vicente, autor de teatro y administrador del Coliseo de esta ciudad, y fue en jueves.

El día 21 de este mes en México, en la Diputación, cayó un rayo y lastimó a don José María de León, portero que era de la ciudad, y en la esquina del callejón de San Bernardo en la tienda, otro lastimó al cajero, y fue en viernes.

Diario de sucesos de México • 51

El día 27 de agosto de 1778 en México, sacaron de la cárcel de Acordada ocho hombres por las calles acostumbradas, dándoles 200 azotes, y fue siendo capitán de dicha cárcel don Pedro Valiente, en jueves.

itiembre de 1778

El día 10 de este mes en México, en la pulquería del Arbol, en la plazuela del

Rastro, fue el día en que se juntaron todos los que estaban citados para las milicias, y en presencia del señor inspector don Pascual de Cisneros, de don Pedro Garibay, mayor de la Plaza, de los dos comisionados de la ciudad que lo eran... y toda la oficialidad de milicias, se escogieron y filiaron a los mejores hombres que les parecieron hasta completar el número de las compañías que son..., y flie en jueves.

El día 24 de septiembre de 1778 en México, se hizo la primera rifa para San Pedro y para Santa Catalina, en ciernes.

El día 28 de septiembre de 1778 en México, sacaron de la cárcel de la Acordada siete hombres para el suplicio, dos a la vergüenza y cinco para ahorcarlos, y entre ellos iba un español llamado don Francisco José Garro. Este tenía en esta ciudad muchos parientes de distinción, y fueron los primeros que se ajusticiaron en tiempo del capitán don Pedro Valiente, y fue en lunes.

El día le de este mes en México, se publicó la residencia del señor don Jacinto Barrios, corregidor que acabó en esta ciudad, y la tomó don Francisco Lisaga, gobernador que era de Tlaxcala, y fue en jueves.

El día 4 de octubre de 1778 en México, murió el padre don Felipe Vinerías, teniente de cura que era del Sagrario y benefactor del altar de Nuestra Señora de los Dolores de dicho Sagrario. El día 6 de dicho mes se enterró en el Sagrario, al lado del evangelio de dicho altar, y se le hizo un entierro muy grande, de forma que al deán de la Santa Iglesia Catedral no se le había hecho uno así jamás. Fue su muerte en domingo y su entierro en martes.

El día 19 de octubre de 1778 en México, se empezó a entregar el apartado que entró de cuenta de la Real Hacienda por el rey, que lo tenía el señor

52 • José Gómez

marqués del Apartado don Francisco Fagoaga, y se le entregó a don Fernando Mangino, que era superintendente de la Casa de Moneda, y fue en lunes.

El día 21 de octubre de 1778 en México, sacaron de la cárcel de la Acordada doce hombres por las calles públicas, dándoles 200 azotes, y fue en miércoles.

El día 3 de este mes en México, en el Real Tribunal de Cuentas, tomó posesión de contador honorario don Juan José Echcvcstc, en presencia del señor virrey Bucareli, en martes. Entre las cosas que le enseñaron este día a su excelencia fue un recibo de don Fernando Cortés, firmado de su puño, con la circunstancia de que en todo el archivo del Tribunal no había otro.

El día 4 de noviembre de 1778 en México, cumpleaños del señor virrey Bucareli, se estrenó el Paseo Nuevo por las calles de Ortega y la de la Victoria, en miércoles. Y este mismo día en el Coliseo se presentó una comedia llamada La Sultana, pero de lo más mala, tan mala, que el virrey se enfadó como nunca lo había visto más que esta vez muy disgustado, siendo su autor don Juan de San Vicente. ,

El día 5 de noviembre de 1778 en México, sacaron de la cárcel de Corte un hombre llamado Manuel Antonio Caraballo, sentenciado por haber tenido acto carnal con una perra. A éste le dieron 200 azotes y lo remataron por diez años de presidio al puerto y fortaleza de la ciudad de Puerto Rico, y a la perra la mataron y la quemaron enfrente de la puerta de la cárcel. La dicha perra era pequeña, muy gorda y de color de canela clara.

El día 10 de noviembre de 1778 en México, fue la elección de rector de la Real Universidad y reeligicron al que estaba, el señor doctor don Salvador Brambila, y se hizo dos veces la elección y hasta las ocho de la noche no se repicó por haber habido discordia y muchos alborotos y consultas al señor virrey, y siguió el punto con discordia.

El día 20 d,c noviembre de 1778 en México, por haber habido discordia en la Real Universidad, eligieron de rector gobernador de ella al señor don Luis de Torres.

Diario de sucesos de México • 53

^Diciembre de 1778

El día 1Q de este mes en México, en el Real Palacio, en acuerdo, tomaron posesión de oidor el señor don Baltasar Ladrón de Guevara, y de fiscal el señor don Manuel Martín de Merino, en martes.

El día 3 de diciembre de 1778 en México, sacaron de la cárcel de la Acordada dos hombres para ajusticiarlos, siendo capitán don Pedro Valiente, en jueves.

El día 14 de diciembre de 1778 en México, sacaron de la cárcel de la Acordada un hombre dándole 200 azotes, sin perjuicio de la causa, por haber herido a un sacerdote, y fue en lunes.

El día 15 de diciembre de 1778 en México, en Palacio en el real acuerdo, tomó posesión de alcalde de Corte el señor don José Antonio de Irizarri, en martes.

El día 17 de diciembre de 1778 en México, murió a las cuatro y cuarto de la tarde don Elíseo Llanos de Vergara, alcalde ordinario que había sido de esta ciudad y regidor supernumerario, benefactor y bienhechor de todos los conventos de México, rector de la Cofradía de los Caballeros en la parroquia de la Santa Veracruz, rector en el Sagrario de la santa iglesia de la Cofradía de los Santos Angeles, y de la mesa de todas las archicofradías, tercero de todas las terceras órdenes y hermano mayor de la de nuestro padre San Francisco, síndico del convento de San Fernando y de la Santa Cruz de Querétaro, síndico del convento de San Hipólito y del Espíritu Santo, hermano mayor del Hospital de Terceros, y en una palabra, bienhechor de todo México. Era natural de la ciudad de Ayamontc en España. El día 18 de diciembre se enterró en el convento de nuestro padre San Francisco y se le hizo una ceremonia muy solemne, doblándose las campanas en todas las iglesias de México, y fue en viernes.

El día 18 de diciembre en México, a las siete de la noche, se prendió friego en la Fábrica de los Cigarros y se alborotó toda la ciudad y se quemaron muchas de las oficinas donde se trabajaba, y fue en viernes.

El día 25 de diciembre de 1778 en México, en la puerta de la Santa Iglesia Catedral, amaneció fijado por público excomulgado Antonio Mariano Bautista, que fue el que azotaron por las calles públicas el día 14 de éste, por haber herido al padre don José Vicente de los Angeles.

54 • José Gómez

El día 29 de diciembre de 1778 en México, a las dos de la mañana, del cuartel del Regimiento de la Corona se huyó don Juan Bernabeo, siendo la tercera vez que se huye, y se despacharon cordilleras por todas partes a buscarlo.

El día 31 de diciembre de 1778, a una legua de la ciudad de México, en el pueblo de Chapultepequc, se voló el molino de la pólvora en el que se murieron más de cuarenta personas, en jueves.

Q^Sño de 1779. Enero

El día 1fi de este mes en México, salieron de alcaldes ordinarios don Miguel Hidalgo y don Francisco Bazo, en viernes.

El día 8 de enero de 1779 en México, le levantaron la excomunión a Antonio Mariano Bautista, excomulgado 15 días.

El día 28 de enero de 1779 en México, sacaron de la cárcel de Corte un hombre para ahorcarlo llamado Juan del Carmen, en jueves.

0yjbrero de 1779

El día 8 de este mes en México, en el Real Coliseo, se hizo la comedia del Mariscal de Birón, burlesca, y fue la más mala que he visto en toda mi vida. Y este día se corrieron en dicho Coliseo dos toros vivos, cosa que nunca se había visto, y fue en lunes.

El día 9 en dicho Coliseo, se hizo El amo criado y hubo otros dos toros y se corrieron liebres y galgos, y fue en martes.

El día 10 también en dicho Coliseo, se hizo La presumida y la hermosa, y se corrieron dos toros, toreó una mujer y se jugaron dos tapados de gallos, y estuvo la tarde muy divertida y fue en miércoles, siendo administrador del Coliseo don Pedro Guadalupe.

El día 11 hubo en el mismo Coliseo tolla, dos toros y dos tapados de gallos, y fue en jueves.

El día 12 en el mismo hubo tolla, dos toros y dos tapados de gallos, y esto fue en viernes.

El día 13 en el mismo, estaba dispuesta la comedia de Pompa adelante y hubo dos toros, dos tapados de gallos y un monte parnaso, y a las doce del [[1]](#footnote-1)

día salió un decreto del señor virrey Bucareli para que no se hiciese nada, y así la gente que había en los cuartos y en las bancas, se les mandó salir y se cerró el Coliseo, y fue una novedad tan grande por estar toda la ciudad alborotada para ir a ver, siendo juez del Coliseo el señor oidor don Francisco Gómez Algarín, y fue en sábado.

El día 17 de febrero de 1779 en México, pusieron en la puerta del Sagrario de la Santa Iglesia Catedral dos mujeres por vendedoras de cédulas de comunión sacrilegas, y las pusieron en su tablado con guardia del Regimiento de la Corona, en miércoles de ceniza.

El día 19 de febrero de 1779 en México, se repicó por aviso de España y en éste vinieron las noticias infaustas siguientes: que el día 12 de noviembre de 1778 en la ciudad de Zaragoza, a las seis de la tarde, se prendió fuego en el Coliseo de aquella ciudad y perecieron más de ciento cincuenta personas, y entre ellas el señor capitán general don Antonio Manso. Que en la ciudad de Granada hubo un terremoto que estropeó muchos edificios. También en este aviso le vinieron las bulas al señor obispo del Nuevo Reino de León, fray Antonio Sánchez Sacedón, religioso dieguino. También le vino la gracia de Su Majestad a don Francisco Medina, de título de Castilla con la denominación de conde, y fue en ciernes.

El día 10 de este mes en México, sacaron de la cárcel de la Acordada cinco hombres, dándoles 200 azotes y no pasaron por la Plaza ni Palacio por estar el Santo Jubileo en el Sagrario, en lunes.

El día 4 de marzo de 1779 en México, sacaron cuatro hombres de la cárcel de la Acordada, tres para darles garrote y el otro para ahorcarlo. Éste era un negro llamado José Miguel Icita y estupró dos niñas; pusieron su cuerpo entero en el paraje que llaman la Palma, cosa que no se había visto en México, así el delito como poner el cuerpo entero, y fue en jueves día en que murió el señor canónigo don N. Santa Cruz.

El día 7 de marzo de 1779 en México, el señor doctor don Cristóbal Fulgor, cura de la parroquia del Santo Cristo de la Palma, quitó el cuerpo de José Miguel Icita, negro, con licencia del señor capitán de la Acordada don Pedro Valiente, y lo enterró en dicho curato de la Palma y le hizo un entierro muy bueno, y fue en domingo. Y este mismo día en México, murió el

56 • José Gómez

licenciado don Cristóbal Torrescano, y el día 8 se enterró en la Santa Iglesia Catedral, en la capilla de San Pedro en una bóveda que está en la entrada de la puerta que es para los legos, y fue el primero que se enterró en ella después de que se compuso la capilla; y fue su muerte en domingo y su entierro en lunes, y era el mejor abogado que tenía esta ciudad.

El día 12 de marzo de 1779 en México, entró el correo de España y no trajo más novedad que la muerte del teniente general don Pedro Cevallos.

El día 23 de marzo de 1779 en México, se cayó muerto el padre don Antonio de la Peña, capellán mayor que era del Hospital Real, y fue en martes.

Oñrilde'1779

El día 3 de este mes en México, le dieron el viático ai señor don frey Antonio María de Bucareli y Ursúa, virrey de esta Nueva España, y salió Su Majestad del Sagrario de la Santa Iglesia Catedral y lo trajo el señor cura segundo don Juan José Domínguez, y el señor arzobispo don Alonso Núñez de Haro y Peralta lo recibió al pie de la escalera de Palacio (digo lo acompañó, porque el señor cura fue el que dio al señor virrey la comunión, porque no quiso su Excelencia que el señor arzobispo se molestara en revestirse), y fue en Sábado de Gloria a las siete y tres cuartos de la noche, y asimismo en el tiempo de la enfermedad de dicho señor virrey, le trajeron las reliquias más especiales que hay en todos los conventos de frailes y monjas y de todas las iglesias de México.

El día 4 de abril de 1779 en México, se había de empezar la comedia por ser primer día de Pascua de Resurrección, pero por la enfermedad del señor virrey se mandó suspender por orden del señor regente don Francisco Romá y Roscll, en tiempo de don Juan de San Vicente, autor de teatro.

Muerte, entierro y depósito

DEL SEÑOR VIRREY DON FREY ANTONIO

María de Bucareli y Ursúa

El día 9 de abril de 1779 en México, en el Real Palacio a las nueve y nueve minutos de la mañana, murió el señor virrey don frey Antonio Mana de Bucareli y Ursúa, caballero Gran Cruz y bailío de la Orden de San Juan de Malta, y se mantuvo en Palacio su cuerpo hasta el día 13 en que salió para el Gonvento [[2]](#footnote-2)

de nuestro padre San Francisco, en donde se depositó hasta la noche del mismo que se llevó al Santuario de Nuestra Señora de Guadalupe, donde quedó sepultado. En el convento de las monjas capuchinas quedó su corazón, en el Sagrario de la Santa Iglesia Catedral quedaron sus tripas, y en la capilla de la Casa de Ejercicios de San Felipe Neri, otras de sus entrañas.

Nota

El señor corregidor don Francisco Crespo, mandó echar un bando para que en la estación del entierro no anduviesen coches ni caballos. Fueron por delante del entierro cuatro cañones de campaña, y detrás dos caballos despalmados con las armas del virrey difunto, y el señor conde de Santiago don Juan de Velasco a caballo, comandó las tropas con el mayor de la Plaza don Pedro Garibay, y con don Diego Lassaga, a caballo. El señor regente don Francisco Romá y Rosell llevó por delante dos bastidores a caballo por la Audiencia Gobernadora, sin piquete. Se notó, y aún se murmuró mucho en esta ciudad que el señor inspector general que lo era don Pascual de Cisneros, no saliera. Adviértese, por si se ofreciere, que los alabarderos rodearon la tumba del virrey con los sombreros puestos, siendo capitán de dicha compañía don Mariano de Velasco y Villavicencio, y que fueron albaceas del difunto virrey don José Chávez y don Joaquín Dongo, y de doliente por ser su pariente don Francisco Cañaveral, capitán del Regimiento de Dragones de España. La última firma que echó el virrey frey Antonio María de Bucareli y Ursúa, fue el día 8 de abril a las dos de la mañana, y fue la de su testamento, en jueves.

El día 9 de abril de 1779 en México, por muerte del señor virrey Bucareli, se abrió en acuerdo en el Real Palacio el pliego de mortaja en que se le entregó al señor regente de la Real Audiencia don Francisco Romá y Rosell, el bastón de capitán general interino, mientras llegaba el señor don Martín de Mayorga, presidente del Reino de Guatemala, que estaba propuesto en primer lugar.

El día 18 de abril de 1779 en México, file la primera vez que fuimos dos compañeros de la Guardia de Alabarderos a casa del señor regente por la mañana, y fuimos don Juan Badamés y yo, José Gómez, y nos dieron de comer y nos trataron muy bien, y fue en domingo. Y este mismo día en el Real Coliseo, se presentó la comedia El Maestro de Alejandro, en que salieron tres bailarines, dos hombres y una mujer, la cosa más pasmosa que se

58 • José Gómez

ha visto en esta ciudad, en particular la mujer, por ser tanta su habilidad, y fue siendo administrador de dicho Coliseo don Juan de San Vicente. Y este mismo día pasó el señor arzobispo de México al pueblo de Tacubaya a consagrar al señor obispo del Nuevo Reino de León, don fray Antonio Sacedón, religioso dieguino.

El día 21 de abril de 1779 en México, a las dos de la mañana, en la iglesia de Jesús Nazareno, encima de la puerta, estaba un nicho con una imagen de Nuestra Señora de las Maravillas muy milagrosa, y sin saber cómo, se prendió fuego y se quemó todo el nicho y la Virgen que era de cuerpo entero, siendo miércoles.

El día 22 de abril de 1779 en México, siendo la Real Audiencia gobernadora, entró el aviso de España y en éste vino la noticia del parto de la princesa de Asturias, que había parido una niña que le pusieron por nombre María Amalia. También le vino a don Manuel Santos de Alducín, familiar que era del señor virrey Bucareli, la Oficialía Real de Sombrerete, y fue en jueves. Y este mismo día en México, se estrenó una dama nueva que vino de La Habana, llamada Antonia de San Martín, e hizo la comedia del Troyano en Jerusalén, y la hizo muy bien, siendo autor del Coliseo don Juan de San Vicente.

El día 23 de abril de 1779 en México, fue la primera misa de gracias a que asistió la Real Audiencia gobernadora y el señor regente de capitán general. Antes de esta ceremonia se pusieron en Palacio tres sillas en la cabecera, en la de en medio el señor regente y a los lados el decano y el subdccano que lo eran el señor don Antonio de Villaurrutia y el señor don Diego Fernández de la Madrid. Pero por no haber asistido el primero se puso en su lugar al señor don Francisco Javier de Gamboa, y así salieron de Palacio estos tres señores en coche con cinco hombres de caballería por delante y su piquete de alabarderos. La compañía de Palacio les presentó las armas. En Catedral la ceremonia consistió en que los esperaron a estos señores en la puerta cuatro canónigos, y que al señor regente no se le puso sitial, sino un cojín por delante, y los mazos de los porteros de la ciudad no se dispusieron por delante, ni le trajeron a besar el evangelio sino la paz y eso no un canónigo, sino el maestro de ceremonias con sobrepelliz y estola. Y este mismo día 23, hizo 7 años y 7 meses que entró en México el señor virrey Bucareli, difunto, y fue esta misa de gracias en viernes.

El día 27 de abril de 1779 en México, pasaron los señores albaceas y parientes del señor virrey difunto con cinco alabarderos, a las honras fúnebres

Diario de sucesos de México • 59

que se hicieron en el Santuario de Nuestra Señora de Guadalupe, por haber sido el virrey benefactor de dicha Colegiata, y fue en martes.

El día 10 de este mes en México, amanecieron en varias esquinas unos rotulo- nes puestos con el nombre de don Francisco Kim, presidente de la Academia de Lambert, en que se decía que el día 10 de junio del mismo año a las dos y doce minutos de la tarde, se verían dos disformes nubes que en llegándose a juntar se oscurecería más que la noche más oscura, y que caería una agua densa que duraría hasta el día 15 del mismo junio, y se movió en esta ciudad tal terror y asombro que se vio obligada la Real Sala del Crimen a mandar dos soldados y un secretario que lo fue don Mariano Cepeda, a quitarlos y traerlos a la Real Audiencia, donde se rompieron, en lunes.

El día 11 de mayo de 1779 en México, entró el expreso de Guatemala con la respuesta del señor virrey interino don Martín de Mayorga a la Real Audiencia gobernadora, en martes.

El día 12 de mayo de 1779 en México, sacaron de la cárcel de Corte para ahorcarlo, a Lorenzo Martín, por haber muerto a su mujer, y fue el primero que se ajustició este año en esta cárcel, siendo la Audiencia gobernadora, en miércoles.

Nota

Miéntese, porque este ajusticiado no fue ahorcado sino encubado y descuartizado, y era de lengua mazahua y en toda esta ciudad no se encontró un padre que supiese su lengua, sino un religioso de San Agustín llamado fray Joaquín Saavedra, y toda esta operación se hizo en el mismo día 12 que fue cuando lo ajusticiaron.

El día 13 de mayo de 1779, entró el correo de España en México, siendo la Real Audiencia gobernadora, y no se repicó hasta el día 14, y en éste vino aviso de la fatal noticia del puerto de Santa María en que se ahogaron más de 400 personas, y fue en jueves.

El día 16 de mayo de 1779 en México, en la calle de Chiconautla, le dieron al señor licenciado don Julián Campa y Cervantes, cura de Totolapa,

cinco puñaladas de muerte, y fue el agresor un sobrino suyo llamado don Agustín Campa y Cuevas, y fue preso por los soldados y traído a la cárcel de Corte donde sigue. El día 22 fue puesto dicfio agresor en la puerta de la Santa Iglesia Catedral por público excomulgado, en sábado.

Los días 19, 20 y 21 de mayo fueron los tres días de luminarias y cortinas en México, por el parto de la princesa de Asturias que parió una infanta a la que le pusieron por nombre doña María Amalia de Borbón, y fue siendo la Real Audiencia gobernadora, y hubo misa de gracias en dichos días que fueron miércoles, jueves y viernes.

El día 28 de mayo de 1779 en México, sacaron de la cárcel de Corte un soldado del Regimiento de la Corona para ahorcarlo. A éste lo castigó y lo sentenció su cuerpo militar, y fue a su ejecución todo su regimiento con dos banderas, y al pie de la horca le leyeron la sentencia y le quitaron el sombrero que llevaba. Entró por los manteros, enfrente de la Catedral, por donde ningún ajusticiado había entrado, y fue el primero que en esta ciudad se había ahorcado, esto es, de soldado, llamado José Ignacio Campechano, y fue siendo gobernadora la Real Audiencia y capitán general el señor regente don Francisco Romá y Rosell, y su coronel don Juan Cambiazo, y teniente coronel don Matías Hermosa, y mayor de la Plaza don Pedro Garibay.

jJunio de 1779

El día 1Q de este mes en México, en el Real Palacio en acuerdo, tomó posesión de alcalde de Corte honorario el señor asesor general del Virreinato don Miguel Bataller, y fue siendo la Real Audiencia gobernadora, y por estar un poco indispuesto el señor regente don Francisco Romá y Rosell no asistió, y le dio la posesión el señor don Antonio de Villaumitia que era decano con los demás señores oidores, en martes.

El día 13 de junio de 1779, entró Nuestra Señora de los Remedios en la Santa Iglesia Catedral, que vino por rogación por el agua y por una peste que había en esta ciudad de sarampión. Se acabó la novena el día 22.

El día 15 de junio de 1779 en México, murió doña Petra Morales, madre de don Juan José Zapata, alabardero, y se enterró en el Sagrario y costó su entierro 26 pesos 1 real; su entierro fue el día 16.

El día 17 de junio de 1779 en México, se repicó por aviso de España y

Diario de sucesos de México • 61

Ríe siendo la Real Audiencia gobernadora, y en este aviso vino la gran noticia del comercio libre, y el día 18 Ríe la misa de gracias, en viernes.

El día 25 de junio de 1779 en México, Ríe la oración fúnebre de las honras del señor don Rey Antonio María de Bucareli y Ursúa, virrey que Ríe de esta Nueva España. Dicha oración la predicó el señor doctor don Gregorio Campos, y subió al púlpito con capelo y bonete de dos colores que eran de dos facultades, una en medicina y otra de filosofia, y los dolientes Rieron don Francisco Cañaveral, capitán de Caballería de Dragones de España, y el señor secretario don Melchor de Peramás, y al primero lo llevó en coche la Real Audiencia, y al segundo el Ayuntamiento de la ciudad, y fue en viernes.

El día 26 de junio de 1779 en México, Ríe la misa y sermón de las honras del señor Bucareli, y dijo la misa el señor arzobispo don Alonso Núñez de Haro, y el sermón el señor doctor don José Uribe. Y este día hubo su pelícano entre los señores regidores sobre el asiento del señor don Melchor de Peramás, y no asistieron los dos alcaldes ordinarios ni el alguacil mayor, sino el decano y el subdccano y el corregidor que lo era don Juan Francisco Crespo, y Ríe en sábado.

El día 5 de este mes en México, se publicó el bando para que los casamientos Rieran iguales por orden de Su Majestad, siendo la Real Audiencia gobernadora, en lunes. Y este día en el Real Palacio en el Cuerpo de Guardia de Alabarderos, se empezó a pintar y quitar las losas del suelo que tenían de puestas como cien años.

El día 7 de julio de 1779 en México, en la iglesia del convento de las madres capuchinas, sacaron al Señor Crucificado del coro alto con el título del Señor del Consuelo, y Ríe la primera vez que salió su Divina Majestad de la iglesia y fue en miércoles, día de la Preciosa Sangre.

El día 8 de julio de 1779 en México, sacaron de la cárcel de Corte para ahorcarlo a Isidro de la Cruz, indio del pueblo de Ixtiahuaca, y Ríe encubado, y este día se estrenaron seis ministros de Corte vestidos de golilla y con ropilla corta, lo que hizo en esta ciudad mucha novedad por no haberse visto, y fue siendo la Real Audiencia gobernadora, en jueves.

»

El día 17 de julio de 1779 en México, en el Real Palacio, se acabó en el Cuerpo de Guardia de Alabarderos el enladrillado, en sábado, siendo la Audiencia gobernadora.

El día 21 de julio de 1779 en México, sacaron de la cárcel de Corte a María Josefa Calderón para las Recogidas, y la sacaron rapada de la cabeza y las cejas por haberla cogido vestida de hombre, en miércoles.

El día 12 de agosto de este mes, se repicó en México por aviso de España, y fue el del mes de julio que se atrasó por temporal que tuvo, y en éste vino la fatal noticia de la guerra con Inglaterra, y fue siendo gobernadora la Real Audiencia.

El día 13 de agosto de 1779 en México, se publicó el bando de la Guerra con mucha solemnidad con todos los tambores de los regimientos y con granaderos y una compañía de dragones que los mandaba el mayor de la Plaza don Pedro Garibay, y fue siendo la Audiencia gobernadora y capitán general el señor regente don Francisco Romá y Rosell, y fue esta guerra de España y Francia contra Inglaterra.

El día 19 de agosto en México, por orden de la Real Audiencia gobernadora, fueron presos todos los dependientes de la Real Lotería, y era su director don Francisco Sarria, y fue en jueves.

Gobierno del virrey don Martín de Mayorga

El día 23 de agosto de 1779 en México, a las once y media de la mañana, entró en Palacio el señor virrey don Martín de Mayorga, y en el real acuerdo se leyó la cédula de Su Majestad, e hizo su juramento ante el señor don Francisco Romá y Rosell, regente, y con todos los demás oidores, porque estaba la Real Audiencia de gobernadora desde la muerte del señor Bucareli, hacía el tiempo de cuatro meses y catorce días y fue en lunes.

El día 25 de agosto de 1779 en México, murió don José María Rivasca- cho, capitán que era del Comercio, y éste fue el primer memorial de cama que proveyó el señor virrey don Martín de Mayorga, y fue en miércoles. [[3]](#footnote-3)

El día 26 de agosto de 1779 en México, murió don Antonio Caballero, soldado alabardero que se estrenó e hizo como tal su primera salida el día de Santa Clara y San Hipólito, y fue la última el mismo día. Empezó siendo virrey el señor Bucareli y acabó siendo virrey don Martín de Mayorga. Su entierro Ríe de lo más ordinario que se ha visto, pues a un cargador no se hace menos, y Ríe siendo su capitán don Mariano de Velasco.

El día 27 de agosto de 1779 en México, se proveyó la plaza de alabardero en don Joaquín del Castillo, por la muerte de don Antonio Caballero, y Ríe la primera que dio el señor virrey don Martín de Mayorga, y Ríe en viernes.

El día 30 de agosto de 1779 en México, murió el señor fiscal del Crimen don Francisco Galindo, y el día 31 del mismo se enterró en el Sagrario de la Santa Iglesia Catedral, enfrente del altar de Nuestra Señora de los Dolores.

El día 7 de este mes en México, en el Hospital de Jesús Nazareno, se colocó la imagen de Nuestra Señora de las Maravillas encima de la puerta del costado que en el mes de abril del mismo año, el día 21, se quemó, y hubo muchos cohetes y repique de campanas, y Ríe en martes. Este mismo día en el Real Palacio Ríe la primera junta que tuvo el señor virrey don Martín de Mayorga, y Ríe de temporalidades de los bienes confiscados de los jesuítas, y asistió el señor arzobispo don Alonso Núñez de Haro.

El día 11 de septiembre de 1779 en México, en el Real Palacio, tuvo el señor virrey junta de Hacienda, y fue en sábado.

El día 20 de septiembre de 1779 en México, sacaron de la cárcel de la Acordada a seis hombres para ajusticiarlos. A cuatro les dieron garrote y dos Rieron ahorcados, y éstos Rieron los primeros que se ajusticiaron siendo virrey el señor don Martín de Mayorga, y capitán de la Acordada don Pedro Valiente, en lunes.

El día 15 de este mes en México, se publicó el bando para traer a Nuestra Señora de los Remedios, para que su Divina Majestad aplacase la peste que

había en esta ciudad de viruelas y otros accidentes por los que moría mucha gente, y desde este día empezó a llover y no paró hasta el día 19, de forma que no se podía andar por las calles.

El día 16 del mismo entró Nuestra Señora a la Santa Vcracruz, y el día 17 debió ser la procesión y por lo mucho que llovía no se pudo. El día 18 se empezó la novena y asistió el señor virrey, y el día 19, viendo que no paraba el agua se dispuso traer a su Divina Majestad en coche, y se hizo en esta fonna: el señor arzobispo de México don Alonso Núñez de Haro con dos prebendados, entraron en una estufa de siete vidrios, en que el señor arzobispo traía a su Majestad viniendo por delante a caballo el señor conde de Santiago, don Juan de Velasco, que traía el guión y a sus lados también a caballo don Luis de Luyan- do, teniente coronel de Milicias, y don... de Lúea, también a caballo, y después seguía la estufa en que iba la Virgen, y luego los canónigos con capas en coche, y luego los tribunales por su orden, y detrás el virrey don Martín de Mayorga con el señor regente don Francisco Romá y Rosell y el señor don Antonio Villaurrutia, y de esta manera vinieron hasta la Santa Iglesia Catedral, pero fue esta función muy memorable por dos cosas, la una, porque nunca se había visto traer a la Virgen en coche, sino en procesión general, y la otra, porque el señor virrey, siendo interino, asistió en Catedral a la función.

El día 24 de octubre de 1779 en México, se publicó un bando por orden del señor corregidor don Francisco Crespo, para que en todas las calles se pusieran hachones de ocote y se quemasen buñigas y otros ingredientes para purificar los aires por la peste que había en esta ciudad, en domingo.

El día 26 de octubre de 1779 en México, se acabó la novena de Nuestra Señora de los Remedios. Por la tarde salió la procesión de la Catedral para la Santa Veracruz y asistió el señor virrey don Martín de Mayorga, siendo interino.

El día 29 de octubre de 1779 en México, en el Santuario de Nuestra Señora de Guadalupe, se sepultó el cuerpo del señor Bucareli, virrey que file de esta Nueva España, en el umbral del Santuario como él lo pidió, en viernes.

El día 4 de este mes, en la Real Aduana, salieron 26 cargadores con su uniforme azul y amarillo por elección del señor don Miguel Páez de la Cadena, superintendente de dicha aduana, y fue en jueves.

Diario de sucesos de México • 65

El día 8 de noviembre de 1779 en México, entró correo de Guatemala con la noticia de que los ingleses habían querido batir el castillo de Umoa, pero que habían encontrado resistencia por unos negros que había en dicho castillo.

El día 9 de noviembre de 1779 en México, en el barrio que llaman de San Salvador el Seco, se estrenó un camposanto para enterrar a todos los pobres difuntos que había por la peste grande de viruelas, y fue bendecido por el señor arzobispo don Alonso Núñez de Haro, en martes.

El día 20 de noviembre de 1779 en México, entró un extraordinario de Veracruz con la feliz noticia de que el señor don... había cogido a los ingleses la isla de... y fue siendo virrey el señor don Martín de Mayorga.

El día 22 de noviembre de 1779 en México, llegó el correo de Guatemala con la fatal noticia de que los ingleses habían cogido el castillo de Umoa y las tres embarcaciones que había en el puerto con tres millones, y que habían degollado al capitán don Francisco... y fue siendo virrey el señor don Martín de Mayorga. Este mismo día, salió la Señora de Santa Teresa en procesión general por la peste que había de viruela, y salieron todas las cofradías y las comunidades y asistieron el señor arzobispo y el señor virrey, y el día 23 se empezó la novena en su santuario, que no quiso el señor arzobispo que friera en Catedral, y salieron todos los tribunales y fue la procesión en lunes. Esta señora ha salido a la calle por rogación cuatro veces; el año de 1737, el de 1749, el de 1761 y el de 1779, que fue ésta.

El día 23 de noviembre de 1779 en México, amaneció muerto el señor marqués de San Mateo de Valparaíso, don Miguel de Berrio y Zaldívar, y murió sin sacramentos, y el día 24 se enterró en el convento de San Bernardo de donde era patrón.

*&í)iciembre de 1779*

El día 9 de este mes en México, salió una orden del virrey Mayorga para que todas las tropas o todo el que gozase fuero militar, se pusiesen la cucarda de dos colores encarnado y blanco por la liga o alianza con Francia, y le pusieron el nombre de La Bella Unión, y file en jueves, años de la princesa de Asturias.

El día 13 de diciembre de 1779 en México, salió de la parroquia de la Santa Veracruz la procesión del Señor de los Siete Velos, y llegando al con-

vento de nuestro padre San Francisco se movió una tempestad de truenos y relámpagos muy grande, por lo que tuvieron que avivar el paso y llegar hasta la Casa Profesa, y allí se quedó su Divina Majestad hasta el día 22 que siguió la procesión. Esta tormenta comenzó en el cerro del santuario de Nuestra Señora de los Remedios y vino cubriendo todo el campo hasta la iglesia de la Santa Veracruz, de suerte que, vino lloviendo detrás de la procesión hasta que su Divina Majestad entró en la Profesa, en donde se le hizo una novena siendo cura de la Santa Veracruz el señor doctor don Teodoro Martínez.

El día 27 de diciembre de 1779 en Monterrey de la Nueva España, murió el señor obispo don fray Antonio de Jesús Sacedón, religioso dieguino.

*Q$ño de 1780. Enero*

El día 1Q de este mes en México, salieron de alcaldes ordinarios don Rafael de Mota, de primer voto, y don José Adalia de segundo.

El día 25 de enero de 1780, entró a México un extraordinario con la noticia del correo de España. El día 26 entraron los pliegos y se repicó, y en éstos le vino al señor don Melchor de Pcramás la jubilación y honores de oidor. Este caballero era secretario por el rey de la Secretaría del Virreinato, siendo virrey interino el señor don Martín de Mayorga. En este aviso le vino también al señor don Pedro Antonio de Cossío, la Secretaría del Virreinato.

El día 28 de enero de 1780 en México, sacaron de la cárcel de Corte dos hombres para ahorcarlos y a una mujer a la vergüenza, la cual quedó tullida y muda por haber aguantado siete vueltas de tortura, y no confesó nada. Estos fueron los primeros que se ajusticiaron este año, en viernes.

El día 5 de este mes en México, se acabó en el Empedradillo una fiesta de juegos y altares que hacían los cereros a San Felipe de Jesús, y fue siendo corregidor don Francisco Crespo.

El día 6 de febrero de 1780 en México, se estrenó la capilla del Señor de Burgos en San Francisco, que es de la nación de los montañeses; dicha capilla es del Señor San José, y fue en domingo de carnestolendas. [[4]](#footnote-4)

El día 17 de febrero de 1780 en México, sacaron de la cárcel de Corte a un individuo llamado José Antonio, alias Callejón, para quemarlo por sodo- mítico, en jueves.

El día 19 de febrero de 1780 en México, sacaron de la cárcel de la Acordada cuatro hombres para ajusticiarlos, y todos se llamaban José y uno de ellos, José Mariano Guerrero El Velero Mexicano, en sábado.

El día 23 de febrero de 1780 en México, amaneció una helada muy grande, y a la noche de este mismo día, enfrente de la Catedral, en un cajón en que hicieron ruido las ratas, alborotaron a México con tropa y rondas y no se encontró nada, y a las nueve y cuarto de la noche en la bajada del puente de Palacio, se incendiaron en otro cajón unos petates y unos palos y tocaron a fuego en todas las iglesias de México, y al cuarto de hora ya no había nada, en miércoles.

El día 25 de febrero de 1780, salieron de México para Acapulco los postreros soldados que iban para Manila en esta forma: primero salió la bandera de los reclutas, después los dragones de los regimientos de España y México, y después los de la Corona y de Asturias, y el día de la fecha salieron también los de Granada, que Rieron en total 700 hombres, siendo virrey interino el señor don Martín de Mayorga e inspector don Pascual de Cisneros, teniente general que era de los Reales Ejércitos de Su Majestad. Este mismo día en México, en el convento de San Francisco, en la capilla del Señor de Burgos, se estrenó el colateral del Señor de los Desagravios, y fue el benefactor el padre fray... Mondragón, en viernes, día de San Matías, que fue a 25 por ser año bisiesto.

Carzo de 1780

El día 11 de este mes en México, entró el señor don Pedro Antonio de Co- ssío y se presentó al virrey Mayorga, y el día 12 del mismo se presentaron a dicho señor todos los oficiales de la Secretaría del Virreinato, por venir de secretario de dicha Secretaría, en domingo de Lázaro o de Pasión.

El día 12 de marzo de 1780 en México, en el Real Palacio, se presentó la Compañía de Alabarderos con el petit uniforme al señor virrey, cosa que en 213 años que estaba fundada esta compañía, no había habido tal petit que se

componía de unos ojales de galón con botón y su fleco, siendo su capitán don Mariano de Velasco, en domingo de Pasión por la mañana. Y este mismo día, en la calle de Balbanera, parió una señora tres hijos varones y les pusieron a todos el nombre de Gregorio.

El día 17 de marzo de 1780 en México, en el Real Palacio, hizo el señor don Martín de Mayorga, virrey interino, un altar a Nuestra Señora de los Dolores, y vino toda la música de Catedral a tocar, y el señor brigadier coronel del Regimiento de Asturias don... Duque, y el señor don Rafael Basco, teniente coronel del Regimiento de Granada. Este mismo día en las casas de Cabildo, se puso también un altar a Nuestra Señora de los Dolores muy especial, y fue el primer año, siendo corregidos don Francisco Crespo.

El día 19 de marzo de 1780 en México, en el Real Palacio, tuvo un pleito don Juan Zapata con el cabo de Escuadra de Alabarderos don Bernardo Calderón, sobre que vino el señor arzobispo a ver al señor virrey y le avisó dicho Zapata que no estaba, y por eso dijo que le quitaba el derecho de cabo.

El día 23 de marzo de 1780 en México, se estrenó en la iglesia de San Agustín un monumento de perspectiva muy especial. Y este mismo día, fue el primero que cogió en la capital al señor virrey Mayorga en Jueves Santo, y para ir a San Bernardo entramos por la callejuela del Pescado, siendo el señor Mayorga el primer virrey que ha pasado por ésta.

El día 30 de marzo de 1780 en México, el señor virrey Mayorga file a cumplir con (a iglesia a Catedral, y fiie en coche con dos muías y no llevó piquete de soldados sino a cuatro alabarderos. Y este día, en el convento de San Diego, se hizo un entierro muy particular a don Joaquín Chávcz de Riva- guero, porque estaba el santo jubileo en dicho convento y no se pudo doblar campanas y se dijo la misa de cuerpo presente en la capilla de la enfermería, arriba, y luego se bajó su cuerpo a la sacristía y se enterró en la bóveda. Este mismo día, en el Real Palacio, ante el señor virrey, hizo su pleito homenaje don Pedro Antonio Cossío de secretario del Virreinato. El día 31 fue el primero en que este señor ocupó su secretaría.

El día 31 de marzo de 1780 en México, hizo un año que el señor Bu- careli amaneció malo, y este día de igual forma amaneció enfermo el señor virrey Mayorga, cosa bien memorable.

i

Diario de sucesos de México • <59

El día 4 de este mes en México, murió el señor general don Francisco Manuel Sánchez de Tagle, y el día 5 se enterró en el convento de Santo Domingo.

El día 8 de abril de 1780, entró en México un correo extraordinario con la feliz noticia de que nuestras armas españolas habían cogido a la Corona británica la isla de la Mobila, junto a Panzacola, siendo virrey interino el señor don Martín de Mayorga.

El día 22 de abril de 1780, entró en esta ciudad de México el correo de España, y en él vino la noticia al doctor don Gregorio Pérez Cancio, cura de la parroquia de Nuestra Señora de la Soledad, de su canonjía en esta santa iglesia.

El día 28 de abril de 1780 en México, en el Real Palacio, vino a hacer su juramento de abogado el licenciado don..., y no lo hizo porque los señores de la Real Audiencia le dijeron que hasta el día 29, cosa que no se ha visto, pues todos tienen tres días, y a este caballero le dieron cuatro.

El día 7 de este mes, entró a México el correo de España con la feliz noticia de la batalla naval que tuvieron ocho navios españoles con veintitrés ingleses, impidiendo aquéllos a éstos la entrada del socorro en la plaza de Gibraltar, siendo comandante el señor don Juan de Lángara, de perpetua memoria.

Nota

En este aviso le vino a don Matías de Carmona, teniente del Regimiento de la Corona, el grado de coronel.

El día 9 de mayo de 1780 en México, en acuerdo en el Real Palacio, tomó posesión de oidor honorario el señor don Melchor de Peramás, secretario que era del Virreinato, siendo virrey don Martín de Mayorga y regente don Francisco Romá y Rosell, en martes.

El día 12 de mayo de 1780 en México, sacaron de la cárcel de Corte un hombre para ahorcarlo, y fue encubado y lo trajeron a la Universidad para

su anatomía, cosa que en 25 años que llevaba yo José Gómez en México, no había visto, y Ríe en viernes.

El día 16 de mayo de 1780 en México, en el portal de los Mercaderes, se puso la repisa de piedra al Santo Ecce Homo en martes de Pascua de Espíritu Santo.

El día 17 de mayo de 1780 en México, se publicó un bando en que Su Majestad mandaba perdonar la residencia del señor virrey Bucareli, cosa que no se ha visto con otro virrey desde que se conquistó el reino, siendo virrey interino don Martín de Mayorga. Y este día sacaron de la cárcel de la Acordada siete hombres, dándoles 200 azotes, siendo capitán don Pedro Valiente, en miércoles.

El día 25 de mayo de 1780 en México, día de Corpus, a las seis de la mañana se movió una tempestad de truenos y relámpagos muy grande, y cayó un rayo y luego se siguió un aguacero, de forma que pensamos que no saldría la procesión, cosa que en 25 años que conozco a México, no había visto, y más a la hora en que fue.

El día 27 de mayo de 1780 en México, entregó el Regimiento de la Corona la plaza al Regimiento de Milicias, y montaron guardia este día en Palacio, y fue capitán don Manuel Luyando y teniente don Diego Carrillo, y alférez don Rodrigo Recio, siendo virrey interino don Martín de Mayorga.

El día 30 de mayo de 1780 en México, se estrenó la caja de agua de la cañería de Belén, en martes.

*junio de 1780*

El día 1Q de este mes, salió de esta ciudad para Veracruz el primer trozo de soldados de la Corona, y el día 3 salió el segundo y el día 5 salieron los últimos, siendo virrey interino el señor don Martín de Mayorga.

El día 3 de junio de 1780 en México, llegó Nuestra Señora de los Remedios a la iglesia de la Santa Veracruz, y el día 4 por la tarde fue la procesión general a Catedral; el día 5 se empezó la novena por la falta de agua, y el día 13 volvió su Divina Majestad en procesión a la’Santa Veracruz.

El día 9 de junio de 1780, entraron a México los soldados provinciales de la Puebla de los Ángeles a guarnecer esta ciudad, y Ríe la primera vez que vinieron de guarnición.

Diario de sucesos de México • 71

El día 10 de junio de 1780, entró a México un extraordinario con la noticia de un combate que tuvieron una escuadra francesa con otra inglesa, a la que derrotó, y por ello se tomó la isla de la Borbada.

El día 15 de junio de 1780, salió de esta ciudad de México el primer Escuadrón de Dragones del Regimiento de España para Jalapa.

El día 20 de junio de 1780 en México, se publicó un bando en que mandaba Su Majestad que a cada libra de tabaco en hoja se subiese dos reales, y estando a peso se puso a diez reales, y a cada arroba de pulque se le pusiera medio real más.

El día 22 de junio de 1780, entró a México un extraordinario de España que no trajo más que un pliego para el virrey interino el señor don Martín de Mayorga.

El día 30 de junio de 1780 en México, sacaron de la cárcel de Corte cuatro mujeres emplumadas a la vergüenza por alcahuetas, y entre ellas sacaron a lonche la Panochem, Hasta la una y cuarto mandó el virrey a dos alabarderos (don Juan Zapata y yo José Gómez) que las bajaran del tablado y las raparan, y asistió el escribano don Rafael Lucero.

*^jfulio de 1780*

El día 2 de este mes, salió de México a Veracruz el señor virrey Mayorga, a reconocer las fortalezas y las tropas por estar en guerra con los ingleses, y fue en domingo.

El día 9 de julio de 1780 en México, en el convento de San Francisco, hubo un alboroto de los frailes contra el padre guardián que era gachupín, llamado fray Mateo Jiménez, de forma que llegaron a las manos y se huyeron 25 religiosos, unos a San Fernando y otros a San Cosme, y fue en domingo.

El día 10 de julio de 1780, entró en México el correo semanario de Veracruz, y éste trajo cartas de La Habana con la feliz noticia de que ya estaba la plaza de Gibraltar por España: que salió falsa.

El día 14 de este mes, entró a México el correo de España con la feliz noticia del parto de la princesa de Asturias y haber dado a luz un infante, al que le

pusieron los nombres siguientes: Carlos, Domingo, Eusebio, Rafael, José, Antonio, Juan Nepomuceno, Gabriel, Julián, Vicente Ferrer, Andrés Abe- lino, Luis, Fernando, Angel, Francisco de Asís, Pascual, Joaquín, Cayetano, Ignacio, Manuel, Ramón, Genaro, Francisco de Paula. Nació el día 5 de marzo de 1780. En este aviso le vino a don Juan Lucas de Lassaga, la cruz de la distinguida Orden de Carlos III, y a don Felipe del Fierro la misma.

El día 16 de agosto de 1780 en México, se publicó el bando para las luminarias y cortinas por el nacimiento del príncipe, por tres días contados desde éste, y el día 17 fue la misa de gracias con todos los tribunales, y no se sacaron más que nueve cañones, debiéndose sacar quince, con que estando en Catedral dio el señor virrey la orden de que se sacasen los demás, de modo que en las tres descargas de la tanda fuesen los quince. El comandante de la Artillería fue don Jacinto Sierra, niño que no sabía su obligación.

El día 18 agosto de 1780 en México, en el Real Palacio, le puso el señor virrey el hábito y la cruz de la distinguida Orden de Carlos III a don Miguel Páez de la Cadena, superintendente de la Real Aduana, y fue en presencia del secretario del Virreinato don Pedro Antonio Cossío, no estando nadie más, en viernes.

El día 19 de agosto de 1780 en México, fue el último de las fiestas del príncipe en el Coliseo, y se presentó la comedia del Maestro de Alejandro. Y este día salió una bailarina, en sábado.

El día 20 de agosto de 1780 en México, en el convento de San Francisco, hubo un alboroto contra el padre guardián fray Mateo Jiménez, de forma que tuvieron el atrevimiento de prenderlo, y a las cinco de la tarde vinieron dos frailes a ver al señor virrey, y éste mandó luego llamar al alcalde de Corte don José Urízar y al escribano don José Villaseca, para que pasaran al convento a poner en libertad de orden de su Excelencia a el guardián, y que el provincial entregase los autos que estaban formados sobre dicho guardián, y habiendo ido el alcalde de Corte con la orden del virrey, no la obedecieron, por lo que esa misma noche se tomaron otras providencias para el día venidero. El día 21 a las seis de la mañana, se juntaron los frailes y llamaron a capítulo en el que eligieron como nuevo guardián a fray Simón Pizarro, y echaron su repique de campanas, teniendo al otro guardián todavía en la cárcel, y a las diez de este día volvió a pasar el alcalde de Corte señor Urízar, con los escribanos, de orden del virrey para que pusieran en libertad al guardián fray Mateo Jiménez, y todavía no quisieron, y se tomó la providencia de poner la tropa sobre las armas y cercar

Diario de sucesos de México • 73

al convento. Por fin, sacaron al padre guardián de la cárcel y lo volvieron a dejar en su empleo y se sosegó todo, pero se está siguiendo el proceso. El día 22 en la noche, mandó el señor arzobispo que no se tocasen campanas ni se dijese misa, pero el día 23 se compuso todo y quedaron contentos.

El día 21 de agosto de 1780 en México, sacaron de la cárcel de la Acordada cinco reos por las calles públicas, dándoles 200 azotes por rateros y utilizar armas cortas.

El día 25 de agosto de 1780 en México, vine yo, fosé Gómez, a casa de la dama Mariana Olivares, con una orden del señor virrey, para que saliera este día a hacer la comedia que estaba anunciada al público, y era: Mujer, llora y vencerás, con que salió y lo hizo muy bien. Esta dama estaba retirada del Coliseo mucho tiempo. Y este día salió también un baile nuevo llamado Loba y lorina. Y todo fue por ser días de la princesa de Asturias.

El día 4 de este mes, empezó a labrarse en México en la Fábrica de Cigarros, unos que eran de 11 a 23 con dos puntas, siendo director del Tabaco, don Felipe del Fierro.

El día 6 de septiembre de 1780 en México, vinieron a Palacio con un memorial para el señor virrey como 300 hombres de la Fábrica del Tabaco, porque les aumentaron el trabajo y les querían quitar medio real, y era administrador don Isidro Romaña, a quien quisieron matar, y hubo su medio levantamiento, y fue en miércoles.

El día 14 de septiembre de 1780 en México, en el convento de nuestro padre Santo Domingo, habiéndose acabado el noviciado, subieron al Señor Crucificado llamado del Noviciado a colocarlo en su capilla, y hubo un gran repique de campanas.

El día 13 de este mes en México, en el Real Coliseo, se hizo la comedia de Los trabajos de Tobías, y en este día, en la segunda jornada, tuvo un accidente la primera dama doña Antonia de San Martín, por lo que el juez don Miguel

Calixto de Acevedo la puso en la cárcel de Abajo, haciendo desaire a varias personas que se empeñaron por ella, y era dicha dama gachupina.

El día 17 de octubre de 1780, amaneció en México la mayor desgracia que se ha visto, y fue que en una accesoria frente de Balvanera, hubo tres muertos que eran una mujer a la que le dieron de puñaladas, un muchachito de siete años degollado, y una muchacha de once años degollada. Esta mujer tema una lechería en dicha accesoria, y en ésta, haría como cosa de diez años que un sillero mató a puñaladas a su mujer.

El día 20 de octubre de 1780, prendieron al agresor que hizo las muertes en la calle de Balvanera, y lo prendió don Antonio de Ayala y Travieso.

El día 21 de octubre de 1780 en México, sacaron a Luis González de la cárcel de la Acordada para darle 200 azotes por haber muerto a su tía y dos sobrinos.

El día 24, día de San Rafael, metieron en capilla a Luis González de 21 años de edad. Lo sacaron el día 26 de la Acordada para ahorcarlo, lo que se ejecutó en el ejido de Velázquez, y fue arrastrado y encubado y descuartizado, siendo juez y capitán don Pedro Valiente, en jueves.

Nota

Adviértese, que el día que le dieron los azotes, Luis González llevaba un papel en el pecho que decía: por haber muerto a su tía la lechera. El día que lo ajusticiaron no lo llevaron por la estación que se acostumbra por estar el Santo Jubileo en San Juan de Dios, y vino {Sor el puente de la Maríscala hasta la calle real del Calvario. Este ajusticiado es el primero que ha habido en la Acordada desde que es juzgado, cosa bien memorable.

El día 3 de este mes en México, en el Real Palacio en real acuerdo, tomó posesión de alcalde de Corte el señor don Juan Antonio de Anda, y no he visto posesión más indigna, porque ni el virrey, ni el regente, ni los oidores, ni el escribano, ni los porteros supieron lo que habían de hacer, y fue en viernes.

El día 6 de noviembre de 1780 en México, fue el primero de toros y bajó el señor viirey don Martín de Mayorga por la mañana y la tarde.

Diario de sucesos de México • 75

El día 7, fue el segundo de toros y no bajó el señor virrey por la mañana, y en su lugar fue el señor regente don Francisco Romá y Rosell y se sentó en la silla de su Excelencia, y no quiso que mandara el regidor decano que lo era don José Ángel de Aguirre, sino el portero de la Real Audiencia don Isidro Tizón. Este mismo día le trajeron al señor virrey de parte del Ayuntamiento de la ciudad, cuatrocientos pesos para las galas que se tiran a los toreros, y no los quiso recibir, y a la tarde cuando bajó, tiró galas de su dinero.

El día 8 de noviembre de 1780, entró en México el correo de Veracruz con la fatal noticia de haberse perdido la escuadra que iba a la expedición de Panzacola.

El día 13 de noviembre de 1780 en México, fue el primero de la segunda semana de toros y no bajó el señor virrey, ni vino el señor regente, por lo que presidió dos días el señor oidor decano don Antonio Villaurrutia y tiró las galas con dinero de su bolsa.

El último día de toros que fue el 16, bajó el señor regente por la mañana y a la tarde el señor virrey, con el bien entendido, que así la primera semana como la segunda, todo el dinero que se tiró de galas fue de cuenta del señor virrey, del señor regente y del señor Villaurrutia, que los regidores no dieron nada. Este día 16 que fue el último, en el postrer toro se movió en toda la Plaza un echar lumbre con los eslabones y un viva con los pañuelos, cosa que dio mucho gusto y risa a todos.

El día 17 de noviembre de 1780 en México, le trajeron al señor virrey Mayorga de parte de la ciudad mil pesos, y luego luego los mandó volver, y habiéndose empeñado este día varios sujetos de distinción con su Excelencia para otra semana más de toros, no la concedió y mandó picar la Plaza, en viernes.

El día 19 de noviembre de 1780 en México, en el convento de Santo Domingo, se hizo la fiesta de Nuestra Señora de Covadonga de los asturianos, y fue mayordomo don Pedro Allesdiosi y convidado para el sermón fray Antonio Blanco de la Orden de San Francisco. Pero, estando ya éste en la sacristía para salir a predicar, le dijeron los frailes dominicos que no le podían dar el púlpito, y se fue, y predicó el prior de dicho convento fray Juan de Dios Córdoba, por lo que se fueron todos los convidados y el mayordomo, quedando enojadas por el desaire las dos comunidades.

El día 21 de noviembre entró en México un correo de Veracruz con la feliz noticia que trajo una embarcación de La Habana al señor virrey, de haber cogido nuestra Armada a los ingleses 55 embarcaciones.

El día 23 de noviembre de 1780 en México, frieron las honras de los militares en la Santa Iglesia Catedral y asistió el señor virrey y predicó un agustino.

El día 28 de noviembre de 1780 en México, trajeron al Santo Eccc Homo de Balvanera en procesión de la casa de don Pedro Valiente, capitán que era de la Acordada, que había sido llevado por hallarse dicho señor muy malo. Este Ecce Homo se renovó por sí solo.

*(diciembre de 1780*

El día 7 de este mes en México, en el portal de los Mercaderes, se estrenó la repisa de la Virgen de la Concepción, que tenía altar de madera y se le hizo de piedra, y fue en jueves.

El día 9 de diciembre en México, en el Real Coliseo, se hizo la comedia de Perabruncer o Marqués Buncerle, y este día en la tercera jornada le dio un accidente al galán y no la pudo rematar. Igualmente, este mismo día, un lacayo se aventó a uno de los centinelas con un cuchillo y lo quiso herir y lo prendieron, y a la señora inspectora se le perdió una rosa de diamantes. Este día eran años de la princesa de Asturias y fue siendo virrey interino el señor don Martín de Mayorga.

El día 11 de diciembre de 1780 en México, en el Real Palacio, en la puerta del Volador, se puso un francés a razones con un centinela, y llegó a agarrarlo del pescuezo, por lo que el centinela sacó la bayoneta y le dio dos heridas de muerte.

El día 13 de diciembre de 1780 en México, entró un expreso de Vera- cruz con la feliz noticia de la toma de Gibraltar, pero venía en duda: ¡Dios quiera sea cierto!

El día 20 de diciembre de 1780 en México, fue un día bien memorable, pues a las ocho y media de la mañana tembló, y este mismo día sacaron de la cárcel de la Acordada cinco hombres para ajusticiarlos. Uno de ellos era hijo de esta ciudad y bien emparentado y conocido, era portero del regidor don Ignacio Iglesias, y salió en serón y había de ser encubado ,y los demás descuartizados. Pero por ser víspera de Pascua, se empeñó el señor don Francisco Vergara, y no los descuartizaron ni encubaron, estando ya la cuba prevenida.

El día 24 de diciembre de 1780 en México, en el Real Coliseo, por licencia del señor virrey, se empezaron después de la comedia unos coloquios

Diario de sucesos de México • 77

que siguieron toda la Pascua, cosa que nunca se había visto, y Ríe siendo autor don Francisco Motón y virrey interino el señor don Martín de Mayorga. Y este día amanecieron en varias esquinas los pasquines siguientes: Pronóstico de cinco años. El año de 80 creció la renta. El de 81, entra el ayuno. El de 82, encomendarse a Dios. El de 83, entrará el inglés. El de 84, todo estará barato.

El día 25 de diciembre de 1780 en México, en la Real Factoría del Tabaco, estrenaron los uniformes con ojales de plata.

El día 31 de diciembre de 1780 en México, en el Sagrario de la Catedral, se hizo la Rinción que hacían los padres jesuítas este día. Y este día en México, murió el brigadier de los Reales Ejércitos de Su Majestad don José Molina, y se enterró en la Profesa.

*lyf no de 1781. Enero*

El día 1° de este mes en México, salieron de alcaldes ordinarios de primer voto don Luis Maldonado, y de segundo, don Joaquín Arizcorreta. Y este día en México, llegó la feliz noticia de haber apresado el señor don Luis de Córdoba 51 embarcaciones inglesas cargadas de efectos con 2 794 personas, y fue siendo virrey interino el señor don Martín de Mayorga.

El día 2 de enero de 1781 en México, se estrenó la Aduana Nueva y se puso un letrero en cada puerta, uno que decía puerta de entrar, y otro que decía puerta de salir, y Ríe siendo virrey interino el señor don Martín de Mayorga y superintendente don Miguel Páez.

El día 3 de enero de 1781 en México, en la calle de la Palma, murió el señor don José Calderón. Este señor era síndico de San Francisco y tenía otras muchas comisiones, y era de mucho caudal y caballero del Hábito de Santiago. Su cuerpo lo llevaron en hombros unos religiosos desde su casa hasta el convento de San Fernando, en donde se enterró el día 5.

El día 7 de enero de 1781 en México, en el Cuerpo de Guardia de Alabarderos, se vio lo que nunca se había visto, y fue que con dos hombres que fuimos yo, José Gómez y Andrés Fuentes, se hicieron las 24 horas de guardia, porque unos estaban malos y otros no fueron, y fue siendo cabo don Bernardo Calderón y capitán don Mariano de Velasco.

El día 13 de enero de 1781 en México, hicieron su fuga de la cárcel de Corte y se salieron 21 reos que estaban por la iglesia. Este mismo día, a las dos [[5]](#footnote-5)

de la tarde, los sacaron de las iglesias en donde se habían refugiado: cuatro en San Miguel y once en Santa Catalina, que fueron los que se encontraron, y fue un alboroto de los grandes que se han visto en México. Y este día, a las once de la noche, murió el señor don Pedro Valiente, capitán que era de la Acordada, y se enterró al día siguiente en el convento de nuestro padre San Francisco. El día 14 del mismo, le dio el señor virrey Mayorga el interinazgo de esta capitanía a don Juan Barberi.

Nota

Adviértese, que los cinco ahorcados que se ajusticiaron el día 20 de diciembre de 1780 en México, en la Acordada, fueron los últimos en tiempo del capitán Valiente.

El día 20 de enero de 1781 en México, en la puerta de la Catedral, riñeron don José Angel de Aguirre y don Félix Sandoval, tanto que llegaron a sacar las espadas. Bien es cierto que Aguirre le dio primero con el bastón a Sandoval, y fue siendo sábado.

El día 23 de enero de 1781 en México, a las cuatro de la mañana, murió de repente el señor don Juan Crisóstomo de Barrueta, regente que era del Tribunal de Cuentas. Y este día a la una del día, entró en el Real Palacio un correo con la infausta noticia de haberse levantado o amotinado los indios del pueblo de Izúcar, por lo que el virrey despachó al alcalde de Corte don José Antonio de Urízar con 100 soldados de caballería para sosegar dicho pueblo. Salió dicho alcalde el día 24. Y este día en México, en el Real Coliseo, hubo un alboroto con el primer galán llamado Ventura de... con los de las bancas, por lo que obligó a don Francisco Motón, que era autor, a presentarse al señor virrey a darle parte, siendo juez el señor oidor don Ramón Becerra, y dueño del Coliseo* don Félix de Sandoval, en miércoles.

El día 29 de enero de 1781 en México, en la casa de la Pila del Puente Quebrado mató un muchacho a su hermano de dos puñaladas, y a su madre porque se metió a apartarlos le dio dos heridas, en lunes.

El día 30 de enero de 1781 en México, en el Real Palacio, en acuerdo tomó posesión de fiscal de lo Civil el señor don Ramón de Posada y Soto, plaza creada nueva, y no pagó media anata. Leyó la cédula el secretario de Cámara don José Mariano Villaseca, siendo virrey interino el señor don Mar-

Diario de sucesos de México • 79

tín de Mayorga, y regente de la Real Audiencia el señor don Francisco Romá y Rosell, en martes.

*(febrero de 1781*

El día 5 de este mes en México, se estrenó misa y rezo nuevo de San Felipe de Jesús, pedidos por el señor canónigo y maestro de Escuelas don Cayetano de Torres, siendo arzobispo el señor don Alonso Núñez de Haro y virrey interino el señor don Martín de Mayorga.

El día 11 de febrero de 1781 en México, en la cárcel de Corte, hizo fuego un reo y se tiró a la calle y se mató.

El día 12 de febrero de 1781 en México, entró un correo con la fatal noticia de que en el Cuzco, en el Reino del Perú, se había levantado un indio cacique y proclamádose rey. Dicho indio se llamaba José Gabriel Tupac Amaro.

El día 14 de febrero de 1781 en México, se estrenó la cárcel nueva de la Acordada, y en este mismo día se pasaron los presos, siendo capitán interino de dicha cárcel don Juan José Barberi. Igualmente este día, se tuvo la noticia cierta de que a las doce y media de la mañana se quemó el molino de la pólvora.

El día 15 de febrero de 1781 en México, a las diez y media de la mañana tembló, en jueves.

El día 26 de febrero de 1781, entró en México el correo de España y trajo noticias muy fatales (?), y en éste le vino al señor oidor don Francisco Xavier de Gamboa, la Regencia de la isla de Santo Domingo. También vino licencia para la fábrica del convento de las madres capuchinas del Santuario de Nuestra Señora de Guadalupe, dispuesto por el difunto señor virrey Bucareli. El comisionado para esta empresa fue el señor doctor Bravo. También vinieron dos obispos nuevos fernandinos, uno para Maracaibo llamado fray Juan Flores, y otro para el Nuevo Reino de León de apellido Rey.

Nota

Cuando vino este aviso, hacía 6 meses y 12 días que no teníamos noticias de España. De tal manera que, desde que se pusieron los correos marítimos, no había faltado otro tanto tiempo.

80 • José Gómez

*(arzo de 1781*

El día 3 de este mes en México, se echó un repique general en todas las iglesias por la llegada de los obispos femandinos.

El día 6 de marzo de 1781 en México, sacaron de la cárcel de la Acordada nueve hombres, dándoles 200 azotes, y fueron los primeros que salieron de la cárcel nueva. Este mismo día en México, murió don Juan José Echeves- te. Este caballero tenía seis conveniencias o cargos del rey. Igualmente este día, entró a la capital correo de España, y en éste le vino al señor Vértiz canonjía; al padre Calderón media ración, y la noticia de la muerte de la suegra del virrey Mayorga.

El día 8 de marzo de 1781 en México, se empezó a tirar la torre que era de los indios en el convento de San Francisco, y se tiró por orden del Ayuntamiento de la ciudad. Este mismo día a las diez y media de la noche, murió el señor alcalde de Corte decano de la Sala del Crimen, don Antonio Rojas y Abreu, y el día 10 se enterró en el convento de Santo Domingo, en jueves.

El día 16 de marzo de 1781 en México, se publicó el bando del donativo en que se mandaba que por una vez dieran todos los españoles dos pesos, los de color quebrado uno, y los indios otro, pero a los españoles con el término de un mes, a los mulatos dos, y a los indios cuatro meses. A los títulos, minero y hombres ricos, no se les puso tasa, sino lo que voluntariamente quisieran dar. ‘

El día 22 de marzo de 1781 en México, salió un decreto del señor virrey para que los alabarderos entraran en el Coliseo sin paga ninguna, que se les había privado, siendo juez de dicho Coliseo el señor oidor don Ramón de Becerra, y lo hizo saber el secretario de Guerra don José Caraballo, y quedó archivado en la Secretaría del Virreinato, siendo capitán de Alabarderos don Mariano de Velasco.

El día 26 de marzo de 1781 en México, salió orden por el señor virrey para que todos los dependientes del tabaco en la dirección entrasen a trabajar desde las siete de la mañana hasta las doce del día, y desde las tres de la tarde hasta las seis.

El día 31 de marzo de 1781 en México, salieron de la cárcel de la Acordada nueve azotados por las calles públicas.

Diario de sucesos de México • 81

*^yíbril de 1781*

El día 1fi de este mes, salió el señor virrey Mayorga para la Catedral en salida pública, sin guardia, por no haber avisado; se foe a oír predicar al señor arzobispo don Alonso Núñez de Haro, y salió con el Ayuntamiento de la ciudad.

El día 4 de abril de 1781 en México, murió repentinamente el padre don Vicente Arteaga, vicario que era de Santa María la Redonda.

El día 12 de abril de 1781 en México, Jueves Santo, fue el señor virrey a la Catedral, y mientras era la comunión y consagración de óleos, se levantó y se fue a la Sala de Cabildo y estuvo en conversación con los canónigos mucho tiempo —cosa que no se había visto en este reino con ningún virrey—, y este mismo día, salió a andar las estaciones y no recorrió más que tres, por haberse levantado una fuerte tempestad de relámpagos y truenos y haber caído un aguacero muy desmedido.

El día 13 de abril de 1781 en México, se acabó el que el Señor del Santo Entierro fuese derecho para la Concepción por mandato del señor provisor Primo de Rivera, y se llevó desde Santo Domingo el Sábado de Gloria en procesión hasta la Concepción.

El día 21 de abril de 1781 en México, fueron al Santuario de Nuestra Señora de Guadalupe los señores virrey y arzobispo, a tomar las medidas o vistas de ojos para el convento de las madres capuchinas, y los canónigos de aquella Colegiata no salieron a recibir al señor virrey, por lo que el señor arzobispo los regañó mucho y les dijo que se la pagarían, y esto fue en sábado.

El día 3 de este mes en México, salió una procesión del Sagrario con el Santísimo Sacramento, para colocarlo en el Colegio de San Ildefonso como lo tenían los padres jesuítas. Llevó a Su Majestad el señor canónigo don Juan de Villavicencio.

El día 10 de mayo de 1781 en México, salió desterrado don Francisco Motón, autor que era del Real Coliseo, por decreto del señor virrey Mayorga.

El día 12 de mayo de 1781, en la Real Lotería, me saqué yo, José Gómez, doce y medio pesos, al cabo de muchos sorteos en que yo le iba al número 1013, y fue la primera vez que salí premiado en compañía de Florencio el negro, lacayo de palacio.

*jf'unio de 1781*

El día 2 de este mes en México, se estrenó en el Sagrario la pila bautismal que hoy está junto a la puerta.

El día 17 de junio de 1781 en México, se estrenó la iglesia de la Encarnación, esto es, la media naranja y el colateral del altar mayor, en domingo. Este mismo día en el convento de San Francisco, durante la procesión del Corpus, salió una compañía de Granaderos del Comercio y fue el primer año en que se vio esto.

El día 18 de junio de 1781 en México, entró un correo de Veracruz con la feliz noticia de que el 8 de mayo de este mismo año, se había tomado a los ingleses la plaza de Panzacola por el señor don Bernardo de Gálvez, por lo que

i

se echó un gran repique de campanas con esquilas.,El día 19 hubo misa de gracias, seis descargas de quince cañones y tres días de iluminación y colgaduras. Los tres días fueron 19, 20 y 21, este último octava de Corpus en que salió el señor virrey a la procesión.

El día 26 de junio de 1781 en México, en el Real Coliseo, se presentó la comedia del Tetrarca, y salió una dama a dar muestra llamada La Obispa, zapatera, pero fuera de ser ésta muy digna, lo hizo de los mil demonios; y fue siendo autor don Lorenzo Montalvo, de suerte que no se ha visto otra cosa más mala en estas tablas, y fue en martes, día aciago.

El día 28 de junio, entró a México el correo de España, y en éste vino la novedad de que llamaban a aquélla tres jefes de La Habana: al gobernador Navarro, al señor Bonet y al señor Navía.

$

*ulio de 1781*

El día 4 de este mes en México, se le notificó al señor chanciller don José Jáurcgui por la Real Audiencia, la orden del rey en que se mandaba que le

Diario de sucesos de México • 83

prefiriera el Tribunal de Cuentas en el asiento. Le notificó la orden don Domingo Quintero, receptor.

El día 5 de julio de 1781 en México, pasó revista general en la Plazuela de San Juan un Batallón de Pardos, estando presente el señor inspector don Pascual de Cisneros, en jueves. Este mismo día, entró a esta capital un extraordinario de Veracraz con la noticia de haber llegado la fragata Minerva, despachada de Cádiz.

El día 6 de julio de 1781 en México, murió el señor don José Rafael Gallardo, individuo del Tribunal de Cuentas, en viernes.

El día 7 de julio de 1781 en México, entró un extraordinario de Vera- cruz avisando la llegada de una balandra de La Habana con la fatal noticia de que en Panzacola, había habido una sublevación de los ingleses y nos habían matado 120 hombres a traición, pero que ya estaba sosegada.

El día 8 de julio de 1781 en México, en la iglesia de Santo Domingo, hubo un auto de fe y salieron ocho personas: siete hombres y una mujer por casados dos veces. Este mismo día en la parroquia del Salto del Agua, en la puerta de la iglesia, castigaron a un hombre por haber cometido un incesto.

El día 9 de julio de 1781 en México, sacaron por las calles públicas dándoles 200 azotes a los siete penitenciados del Tribunal del Santo Oficio, es decir, a los hombres, a la mujer no la sacaron. Este mismo día llegó de Guatemala la fatal noticia de que el 4 de junio habían desembarcado en el pueblo de San Pedro Sula, una porción de ingleses que echaron en tierra muchos negros zambos, y que se quedaron en el pueblo y lo quemaron y se llevaron 800 fúsiles y 36 quintales de pólvora, lo mismo que el equipaje de un oidor que pasaba para Guatemala, y que la gente del pueblo y tropa huyeron al monte sin poder remediar nada.

El día 12 de julio de 1781 en México, salieron de la cárcel de la Acordada quince hombres por las calles públicas, dándoles 200 azotes por varios delitos, y es cosa que desde que estoy en este reino en que cumplo por la gracia de Dios 26 años, que no he visto tantos azotados en im día, y fue siendo capitán interino de la Acordada don Juan José Barberi, y fue en jueves. Este mismo día en el Santuario de Nuestra Señora de Guadalupe, se empezó la obra del convento de las madres capuchinas, y fue siendo abad de dicha Colegiata el señor doctor don José Félix Colorado. Y este día, estando por publicarse un bando, salió orden para que se retirara la tropa y el secretario. En dicho bando se decía que era para un indulto y no se echó, y fue siendo virrey interino don Martín de Mayorga.

El día 16 de julio de 1781 en México, a las diez y media de la noche,

pasó el señor arzobispo don Alonso Núñdz de Haro a Nuestra Señora de Loreto a su santa casa, desde el convento de la Encarnación, en donde había estado depositada desde el día 7 de agosto de 1773, y este mismo arzobispo la llevó y la trajo, y fue en lunes, día de la Virgen del Carmen.

El día 24 de julio de 1781 en México, seis alabarderos y su cabo que era don Lorenzo Manco, fueron a la iglesia de San Francisco a vísperas del Señor Santiago. El 25, día del Santo Apóstol, fueron otros trece alabarderos con dos cabos que eran don Lorenzo Manco y don Bernardo Calderón. Dieron de gracia a los que fueron, cuarenta pesos, y sobre la repartición hubo muchos alborotos entre ellos, por lo que su capitán don Mariano de Velasco mandó que se repartieran por partes iguales. Fue el primer año en que fueron tantos, porque antes no iban más que dos alabarderos a las vísperas, dos a la fiesta por la mañana y dos por la tarde al depósito.

El día 25 de julio de 1781 en México, a las nueve de la noche, murió el señor don Manuel Martín Merino, fiscal del rey, y se enterró el día 27 en la iglesia de Santo Domingo.

El día 28 de julio de 1781 en México, a las seis de la tarde, murió el señor don Ramón González Becerra; se enterró en el convento de San Francisco el día 30 por la mañana, y fue la muerte en sábado y el entierro en lunes.

El día 30 de julio de 1781 en México, entró el correo de Tierradentro con la fatal noticia de que el real de minas de Bolaños y el pueblo, se habían perdido por haberse anegado, debido a los grandes aguaceros que habían caído.

El día 31 de julio de 1781 en México, en el Real Palacio, entró la última compañía de Milicias de Guardia, siendo sus oficiales el capitán don José Melgarejo, el teniente don Juan Otal y el alférez don Francisco Javier Cossío, en martes. Y este día acabaron con la comedia Del arca de Noé al diluvio.

El día 1Q de este mes en México, empezó el Regimiento del Comercio a montar guardias en todas las que hay, menos en las tres cárceles ni en el molino de la pólvora, que para esto quedaron cuatro compañías de milicias, y fueron los primeros oficiales que entraron de guardia en el Real Palacio

Diario de sucesos de México • 85

el capitán don Francisco Rábago, el teniente don Juan Fernández Peredo y el alférez don José María Ibarrola.

El día 2 de agosto de 1781 en México, fue la primera vez que estuvo en el Real Coliseo la Compañía de Granaderos con su oficial don José Orio, y se hizo la comedia de El socorro de las monjas a la que asistió el señor virrey interino don Martín de Mayorga, en jueves.

El día 4 de agosto de 1781 en México, pasaron los señores don Pedro Antonio de Cossío y don Felipe del Fierro a prepntar a todos los trabajadores de la Fábrica de Cigarros, que en dónde querían que estuviese la Concordia, y respondieron que en San Juan de Dios, y fue con orden del señor virrey. Este mismo día, en el convento de Santo Domingo, se estrenó un trono de plata que se hizo en el taller de don Joaquín Villarreal.

El día 8 de agosto de 1781, murió en la ciudad de México a las cinco de la tarde el alabardero don Francisco Fígaro, y el día 9 a las diez de la mañana salió el nombramiento para que ocupara su plaza don Juan del Villar.

El día 13 de agosto de 1781 en México, fue la función del Pendón y lo sacó don José Ángel de Aguirre por don Rodrigo de Neira, y asistió el señor virrey de tal forma, que vino con botas y todo, pero se metió en el coche y se fue al Paseo Nuevo y volvió, y después se fue a la comedia y luego que vino se puso a platicar con don Rafael Bosco, sargento mayor de Granada, y se estuvo hasta las once y tres cuartos de la noche.

El día 14 de agosto de 1781 en México, se le preguntó al señor virrey Mayorga si saldría a la Catedral el día 15, y dijo que no, y ese día a las cinco y media de la mañana decidió que sí, de modo que se anduvo toda la mañana buscando a los alabarderos, y con todo eso faltaron cuatro y el mayor de la Plaza, de forma que desde que se conquistó este reino hasta hoy, hace 260 años, no se había visto otra cosa como ésta.

El día 17 de agosto de 1781 en México, trajeron a colocar a las cinco de la tarde en el Sagrario de la Catedral a Nuestra Señora de la Luz, que estaba en la iglesia de San Pedro y San Pablo de los padres jesuítas, y fue en viernes.

El día 18 de agosto de 1781 en México, entró el señor mariscal de campo don Guillermo Warghan, y un capitán llamado don Cayetano, alemán, que era su secretario.

Los días 22 y 23 de agosto, se publicaron los bandos del indulto para soldados y paisanos, por el parto de la princesa de Asturias. En dicho día 23, en el Arzobispado, un capitán de Dragones de Guatemala se peleó con el oficial mayor

del Juzgado de Testamentos, y le dio dos puñaladas, por lo que la Guardia del Comercio que estaba en dicho Arzobispado, arrestó al capitán que se llamaba don Felipe Sesma, hasta que se dio cuenta al señor virrey, y se mandó que a dicho capitán lo llevara el mayor de la Plaza preso a su casa, hasta que se determinara el asunto. El oficial del Tribunal de Testamentos se llamaba don Baltasar García de la Puente, y es abogado; pero el día 25 del mismo mes, por ser día de la princesa de Asturias, se compuso todo y se le dio libertad a dicho capitán.

El día 24 de agosto de 1781 en México, en el Sagrario de la Santa Iglesia Catedral, a las se'is de la tarde, se colocó a Nuestra Señora de la Luz en su colateral, y hubo procesión dentro de la iglesia y se cantó la Salve y letanía, y fue de capa el señor cura mayor don Juan José Domínguez. Esta imagen estaba en la iglesia de San Pedro y San Pablo de los jesuítas, y es muy rica, pues las alhajas que tiene valen muchos pesos.

El día 25 de agosto de 1781, en el Sagrario de la Catedral, amaneció colocada Nuestra Señora de la Luz, y tenía a los pies un dragón en ademán de tragarse aquella alma que tiene la Virgen en la mano, y la tuvo siempre; pero el día 26 le quitaron el dragón por superior mandato.

*( ^Jptiembre de 1781*

i

El día 1Q de este mes en México, en el Reaj Palacio, se mudó a vivir el señor mariscal de campo don Guillermo Warghan, y por no estar su cocina en corriente este día comió en la fonda, cosa que se notó mucho, porque siquiera este día le hubiera dado de comer el señor virrey.

Nota

El mes de agosto del presente año, tuvieron los alabarderos de propinas uno y medio reales, cosa que en diez años que yo llevaba de alabardero no había visto semejante.

El día 2 de septiembre de 1781, a las doce y tres cuartos del día entró a México el correo de España con la fatal noticia de que los ingleses habían metido socorro en Gibraltar, y que en el Cuzco ya habían prendido a Tupac

i

Amaro y a otros muchos, y los habían ahorcado. .

Diarin de sucesos de México • 87

El día 4 de septiembre de 1781 en México, en el Real Coliseo, haciendo la comedia de La conquista de México, en el vuelo que tiene, cayó don José Moreno y se lastimó.

El día 9 de septiembre de 1781 en México, se estrenó la media naranja de la Tercera Orden de San Francisco. Y este mismo día, pusieron un hombre a la vergüenza en la puerta del Sagrario con un papel en el pecho por haber comulgado dos veces en un día.

El día 10 de septiembre de 1781 en México, fue el día más fatal que he tenido yo, José Gómez, pues se me cayó el reloj y lo pisé, y a la noche me cayó un aguacero muy bueno; en fin, no tuve un rato a gusto.

El día 12 de septiembre de 1781 en México, se estrenó la acequia de Nuestra Señora de Guadalupe, y fueron en un barco que iban por delante muchos señores regidores con el corregidor don Francisco Crespo, el señor juez de la ciudad, el señor oidor don Miguel Calixto de Acevedo, muchos canónigos de la Catedral y del Santuario de Guadalupe, y muchos coroneles y títulos de esta ciudad. El barco era del chino don Luciano, quien iba de patrón, y luego muchas canoas muy compuestas.

El día 13 de septiembre de 1781 en México, sacramentaron al señor inspector don Pascual de Cisneros, y fue toda la oficialidad y muchas personas distinguidas, en jueves.

El día 23 de septiembre de 1781 en México, a las diez de la noche, entró un extraordinario de España con pliegos de oficio, pero éste trajo unas novedades fatales y una pesadumbre al señor virrey, de las mayores que ha tenido en su vida, y fue que todos los grados que había dado a los oficiales, no se aprobó ninguno, y a un familiar suyo llamado don Francisco Rocha, a quien le había dado la dirección de la Lotería, vino quitado y puesto otro en su lugar.

El día 10 de este mes en México, murió don Ambrosio Meave, caballero de Santiago, y se enterró el día 2 en el convento de San Francisco, esto es, se depositó, porque en la noche se pasó su cuerpo a las Capuchinas, pero se le hizo un entierro muy famoso. Su muerte fue en lunes y su entierro en martes.

El día 6 de octubre de 1781 en México, salió la cuerda de las tres cárceles para presidio, y entró otra cuerda con más de cien mecos y mecas. Este mismo

día, sacaron de la cárcel de Corte una mujer emplumada por alcahueta, y la pusieron en un tablado en la puerta de la cárcel. Y este mismo día, entró a México el señor fiscal del Crimen don Lorenzo Fernández de Alba, y pusieron en el Cuerpo de Guardia de Alabarderos una vidriera con una ventana, por cuenta del señor virrey Martín de Mayorga, en sábado.

El día 7 de octubre de 1781 en México, les quitaron a todos los oficiales del Comercio las divisas de graduados que no aprobó Su Majestad, esto es, todas las que había otorgado el señor virrey Mayorga. Y este mismo día, murió en México el señor conde de Medina y Torres don Francisco Antonio Medina y Torres, caballero de la Orden de Alcántara, en domingo.

El día 8 de octubre de 1781 en México, mató un recluta del Regimiento de Dragones de España a un cabo de Escuadra del Regimiento de Provinciales de Puebla, y el día 9 lo sacaron de Santa Catalina con soldados del Comercio y con los dragones del regimiento del muerto, y lo trajeron a la cárcel de Corte.

El día 9 de octubre de 1781 en México, fue el entierro del señor conde de Medina en el convento de Santo Domingo, y hubo una etiqueta sobre no dejar cargar el cuerpo a los caballeros, estando presente el señor virrey. Y este mismo día, se verificó la orden para que todos los graduados de milicias por el señor virrey Mayorga, se quitasen su divisa, de forma que desde que se conquistó este reino, no se había visto cosa semejante ni aviso de más pesadumbre, y fue en martes.

El día 11 de octubre de 1781, en el real acuerdo en Palacio, tomó posesión de fiscal del Crimen el señor don Lorenzo Fernández de Alba, y hubo su etiqueta sobre que entrara la Real Audiencia a tomar la venia al señor virrey, que no era costumbre para ir por él a su habitación, y fue en jueves.

El día 13 de octubre de 1781 en México, entró un correo de San Blas con la noticia de haber llegado a aquel puerto la fragata Princesa, que venía de Manila con trece meses de navegación. Esta arribó a una isla nuevamente descubierta a la que le pusieron el nombre de Nueva Bretaña, en donde sus moradores le dieron buen pasaje, la mapearon y le trajeron muchos instrumentos de armas de guerra de los que usaban, pinturas y otros primores.

El día 17 de octubre de 1781 en México, se empezó a abrir la acequia de San Juan de Letrán para ir a Nuestra Señora de Guadalupe, y fue siendo virrey interino el señor don Martín de Mayorga.

Diario de sucesos de México • 89

El día 29 de octubre de 1781, entró en México el correo de Tierradentro con la fatal noticia de haberse levantado los indios mecos de la misión del Río Colorado, siendo cabeza de ellos el capitán Palma, que en tiempo del señor Bucareli bautizaron con otros cuatro en el Sagrario de la Catedral y le pusieron por nombre Carlos. Este picaro movió a los indios que mataran a cuatro padres de San Femando, a un capitán llamado Islas y a todos los españoles, incluyendo a las mujeres, sin dejar a ninguno con vida.

El día 4 de este mes en México, se estrenó en la Casa de Moneda la Real Academia de Pintura, siendo el maestro mayor don Jerónimo Gil, en domingo.

El día 8 de noviembre de 1781 en México, entró el correo con la noticia de estar amarrada la nao de China.

El día 9 de noviembre de 1781 en México, entró el correo de España, y en éste vino al señor don Bernardo de Gálvez la tenencia general, y lo mismo al señor Solano, y al señor don Matías de Gálvez de mariscal de campo.

Nota

El día 29 de octubre de 1781 en México, se acabó en el portal de la Visitación el retablo de piedra de Nuestra Señora de los Dolores, y se estrenó el día 11 de noviembre del mismo año.

El día 11 de noviembre de 1781 en México, en el Real Palacio, mandó el señor virrey interino Mayorga, quitar las bayonetas a toda la guardia de Palacio y a la de Comercio, esto es, de los fusiles; cosa que es contra ordenanza.

El día 12 de noviembre de 1781 en México, en el Real Palacio, el señor virrey Mayorga le puso la cruz de la distinguida Orden de Carlos III a don Juan Lucas de Lassaga, regidor de la Nobilísima Ciudad, en lunes.

El día 13 de noviembre de 1781 en México, salió orden del señor virrey para que volvieran a poner los soldados de la Guardia de Palacio las bayonetas en sus fusiles.

El día 14 de noviembre de 1781 en México, les quitaron a todos los soldados del Regimiento de Comercio sus espadas, por orden del señor virrey.

El día 15 dfe noviembre de 1781 en México, en la Santa Iglesia Catedral, fueron las honras de los militares, y predicó el señor doctor don Mariano Gamboa, cura de Cuautidán. Este mismo día en México, en la Real Audiencia, se trató el punto sobre el fuero eclesiástico y la justicia ordinaria relativa a un preso dependiente de la curia. En este asunto intervino el señor alcalde de Corte don José Antonio de Urízar, y hablaron, de parte de lo eclesiástico, el señor doctor Velasco, y por lo secular los señores fiscales don José Posada y don Lorenzo Fernández de Alba.

El día 16 de noviembre de 1781 en México, se echó el bando de los honores del Regimiento del Comercio, y se echó con toda solemnidad, pues asistieron los granaderos y todos los sargentos y todos los tambores y la música de la compañía de don Francisco Rivera, en viernes.

Nota

I

Adviértese, que en este tiempo estaba el Regimiento del Comercio montando todas las guardias de esta ciudad, siendo coronel el señor don Juan Perezcano.

El día 17 de noviembre de 1781 en México, les devolvieron las espadas a los soldados del Comercio, que se las habían quitado el día 14 por orden del virrey.

El día 18 de noviembre de 1781 en México, entró el señor don Francisco de Saavedra, venido especialmente de España.

El día 22 de noviembre de 1781, en la ciudad de Oaxaca, sucedió la mayor desgracia que se ha visto, y fue que se halló quemado en su cama al mayorazgo don Matías Ramírez, cosa pasmosa.

El día 23 de noviembre de 1781 en México, sacaron de la cárcel de la Acordada cinco hombres para ajusticiarlos, siendo uno de ellos el afamado Mariano Eslaba, alias El Tinoso, y asistieron las dos compañías de granaderos del Comercio, siendo la primera vez que asistían a estas justicias con sus capitanes don Francisco Rivera y don Diego Ortigosa, y fue siendo capitán de la Acordada don Juan Barberi. Y este mismo día, en la Real Audiencia, se votó el punto de la fuerza con la iglesia, y el señor alcalde de Corte don José Antonio de Urízar, perdió el pleito, siendo regente el señor don Francisco Romá y Rosell, virrey interino el señor don Martín de Mayorga y arzobispo de México el señor don Alonso Núñez de Haro y Peralta.

Diario de sucesos de México • 91

Nota

Este mismo día 23, entre los cinco que sacaron de la Acordada para ajusticiarlos, dos fueron también a la vergüenza y estuvieron debajo de la horca, mientras se cumplía la justicia, siendo capitán interino don Juan Barberi. Y este mismo día en el Cuerpo de Guardia de los Alabarderos, pusieron en el cepo a don José Contreras, de la escuadra de don Lorenzo Manco.

El día 27 de noviembre de 1781 en México, entró un correo del puerto de Acapulco con la fatal noticia de haber llegado una embarcación del Perú, informando que seguía la sublevación encabezada por un primo del inca Manco Capac, que está haciendo las mayores atrocidades, y que el señor Areche, regente de allá y cuatro oidores, habían sido llamados a España.

El día 28 de noviembre de 1781, entró un correo en México del pueblo de Pachuca, por el que se supo la noticia de que el día 27, es decir, el día anterior, a las cuatro menos cuarto de la mañana, murió sin sacramentos el señor conde de Regla don Pedro Romero de Terreros, caballero de la Orden de Calatrava y el vasallo más rico que tenía el rey de España.

El día 2 de este mes en México, fue la función de las bulas, y era comisario el señor don Gregorio Omaña, canónigo de esta Santa Iglesia Catedral, y tesorero don Pedro Ayer Díaz. En la noche fueron los fuegos, pero muy desgraciados, porque llovió como nunca.

El día 26 de diciembre de 1781 en México, en el zaguán de la cárcel de la Diputación, se colocó una imagen de Nuestra Señora de Guadalupe y se compuso todo el cuerpo de guardia de dicha cárcel, lo mismo que el cuarto de don Antonio Montaño, sargento del Comercio.

El día 30 de diciembre de 1781 en México, entró un extraordinario de España, y éste trajo la noticia de la toma por asalto del puerto Mahon por los españoles.

El día 31 de diciembre de 1781 en México, en el Real Palacio, hizo su juramento de castellano de Acapulco don Rafael Basco, teniente coronel del Regimiento de Asturias, ante el señor virrey Mayorga y el secretario de Gobierno don José Gorráez, y dio para 24 alabarderos un peso de propina, cosa

que hasta el día no se había visto. Y este día, en el Sagrario de la Santa Iglesia Catedral, hubo una función muy grande en la noche, y fue el señor virrey Mayorga con la Nobilísima Ciudad bajo dé mazas y el señor arzobispo don Alonso Núñez de Haro. Esta función era la que hacían los padres jesuítas en la Casa Profesa. Y este mismo día en México, se estrenó el coro del Sagrario de la Catedral, en lunes.

o& o de 1782. Enero

El día lfi de este mes en México, salieron de alcaldes ordinarios de Primer Voto, don José Benito Medina, capitán de Milicias, y de Segundo, don José Torre Calderón.

El día 10 de enero de 1782 en México, se estrenó la capilla que está en el Sagrario junto a la puerta principal que da al cementerio. El día 14 de enero de 1782 en México, en la Real Audiencia, se examinó de abogado un colegial de San Juan de Letrán llamado don José Vicente Sánchez, y fue el primero que se examinó de este colegio, siendo rector de él, el señor doctor don Andrés Valdés.

El día 20 de enero de 1782 en México, a las doce y cuarto de la noche tembló.

El día 21 de enero de 1782 en México, a las diez de la noche, en una casilla de pulque del Puente de Tezontlale, sucedió un accidente muy particular y fiie, que yendo de ronda el señor alcalde de Corte don Juan Antonio de Anda, acompañado del capitán de la Sala don Pedro Bustamante y del escribano don Rafael Lucero, entraron en donde había dos soldados dragones del Regimiento de Provinciales de Puebla, y queriendo sacar el señor juez a unas mujeres que estaban con los soldados, se alborotaron y tiraron éstos de las espadas y le dieron al señor de Anda, a Bustamante y al escribano, y a toda la ronda muchos latigazos, cosa que desde que se conquistó este reino no se había visto, y fue siendo virrey interino el señor don Martín de Mayorga.

El día 24 de enero de 1782 en México, en el Santuario de Nuestra Señora de los Angeles, se abrieron los cimientos para la iglesia nueva, y frieron la hija de la sobrina del señor arzobispo don Alonso Núñez de Haro, la hija del señor marqués de San Miguel de Aguayo, y todos los principales caballeros de México, y concurrieron a la función y picaron con barretas. Hubo misa [[6]](#footnote-6)

cantada y sermón que predicó el padre don José Sancho, siendo mayordomo perpetuo don José de Haro. Y este día sucedió un caso bien raro, y fue que habiéndose disparado un coche de don Agustín de Espinóla, vino a parar en donde se sumió una rueda y se descubrió una calavera que llevaron a la iglesia, donde le dieron sepultura.

El día 25 de enero de 1782 en México, en el Real Palacio, en la puerta de la Real Audiencia, se estrenó un tabique de tablas con tres vidrieras, siendo portero decano don Isidro Tizón, que fue quien corrió con la obra.

El día 29 de enero de 1782 en México, salieron del convento de Corpus Christi seis monjas para la ciudad de Oaxaca, de fundadoras, y las llevó el cura del pueblo de Ocacal de aquel Obispado, el doctor don José Ruiz, que vino por dichas monjas desde Oaxaca. Las acompañaron las principales señoras y caballeros de México con el señor arzobispo don Alonso Núñez de Haro, hasta más allá del Santuario de Nuestra Señora de Guadalupe. Los nombres de las seis monjas son los siguientes: sor María Teodora de San Agustín, ex abadesa presidenta; sor María Clara de Santa Gertrudis, sor María Martina de la Luz, sor María Petra del Santísimo Sacramento, sor María Francisca Liberata de San Pedro de Alcántara, y sor María Gertrudis de los Dolores.

El día Io de este mes, a las ocho y media de la noche, entró en esta ciudad de México el correo de España, y en éste le vino nombramiento de oidor al señor don José de Urízar, y al alcalde mayor de Taxco don Manuel de Santa María, la Capitanía de la Acordada.

El día 3 de febrero de 1782, a las cuatro de la mañana, murió en San Miguel el Grande ei señor doctor don Juan Ignacio de la Rocha, obispo de Valiadolid, en la Provincia de Michoacán, que se consagró en la Catedral de México el día 18 de enero de 1778, con que fue obispo cuatro años y diez y seis días, y fue su muerte en domingo, día de San Blas.

El día 7 de febrero de 1782 en México, a las ocho de la noche, murió don Miguel de Rivadcneira, capitán del Regimiento de Dragones de México, graduado de teniente coronel.

El día 8 de febrero de 1782 en México, el centinela que se hallaba en el Arzobispado se puso a jugar con un lego de San Francisco y se le disparó

el fusil y le lastimó el dedo chiquito de la mano de aquél. Y este día se enterró en México, en la Santa Iglesia Catedral, al señor canónigo tesorero de Valladolid don Melchor Ulibarri.

El día 9 de febrero de 1782 en México, en la iglesia de San Agustín se enterró al capitán don Miguel de Rivadcncira, y fueron a su entierro el Ayuntamiento de la ciudad, la Real Audiencia y el Cabildo eclesiástico, y asistieron dos compañías de dragones provinciales de Puebla y dieron su descarga.

El día 10 de febrero de 1782, en la ciudad de Oaxaca, se bendijo el convento de las monjas inditas que salieron de México del convento de Corpus Christi. Lo bendijo el señor don Pedro Quintana, deán de aquella santa iglesia, y file padrino el alcalde de Segundo Voto don Andrés Fernández de La- rrazábal, y se llamó el convento de Nuestra Señora de los Ángeles.

El día 14 de febrero de 1782 en México, en el Real Palacio, hubo una junta de todos los hombres ricos del comercio, y otra el día 16 de todos los floristas, a fin de hacer un préstamo de millón y medio que pedía Su Majestad. Dichas juntas fueron en el cuarto del señor secretario don Pedro Antonio de Cossío, y no asistió el señor virrey que fue muy relegado de todos.

El día 24 de febrero de 1782 en México, en el convento de San Agustín, se estrenó el colateral del altar mayor, pero muy especial, siendo provincial el padre fray Francisco Javier Velarde, en domingo, día de San Matías apóstol. Y este día en la ciudad de Oaxaca tomaron posesión de su convento nuevo las seis monjas indias que salieron de esta ciudad de México del convento de Corpus Christi.

(arzo de 1782

El día 2 de este mes en México, entraron a montar guardia en la cárcel de Abajo los granaderos del Comercio, en sábado.

El día 11 de marzo de 1782 en México, a las cinco de la tarde, entró el correo de España con la noticia más infausta que pudo haber venido, y fue que decían que el emperador de Alemania José II, había abjurado de la religión católica, y que en su reino había dado libertad de conciencia. También trajo lastimosas noticias de que del castillo de Gibraltar salieron los ingleses a atacar nuestro campo y clavaron los cañones y prendieron fuego a nuestras trincheras, y otras varias noticias todas funestas.

Diario de sucesos de México • 95

Nota

Este aviso fue en todo memorable, porque vino extraviado y no se repicó hasta tres días después, y la misa de gracias fue hasta el cuarto día.

El día 16 de marzo de 1782 en México, se ordenó de sacerdote don Ignacio Calderón, hijo de don Bernardo Calderón, cabo de Escuadra de Alabarderos, en sábado. Y este día, salió de la cárcel de Abajo Francisco Sierra, el cual había estado en las cárceles 14 años, y antes estuvo en presidio por haber hecho cuatro muertes y varios heridos. Salió de la cárcel, porque alcanzó el indulto por el parto de la princesa de Asturias.

El día 22 de marzo de 1782 en México, en el Sagrario de la Catedral, en el altar de Nuestra Señora de los Dolores, cantó su misa nueva don Ignacio Calderón, y Rieron sus padrinos de capa el señor cura del Sagrario don Juan Francisco Domínguez y don Juan José de Alcíbar. Y este día entró el correo de España con las noticias siguientes: al señor don José de Urízar, alcalde de Corte en la Real Sala del Crimen, le vino el nombramiento de oidor de la Real Audiencia de México; al señor don Manuel de Santa María, alcalde mayor, el nombramiento de capitán de la Acordada; al señor don Martín de Alegría, el nombramiento de contador del Tribunal de Cuentas, y al señor don Francisco Xavier de Gamboa, que era oidor, el que admitiera la Regencia de Santo Domingo, y si no que fuera depuesto de la toga y desterrado 50 leguas de México. Y este día 22 en México, en el Sagrario de la Catedral, se estrenaron los lienzos de la Pasión que están junto al altar de Nuestra Señora de los Dolores.

El día 29 de marzo de 1782 en México, Viernes Santo, fue el señor virrey Mayorga a la iglesia del Espíritu Santo en la noche, a oír el sermón del pésame de la Virgen, que lo predicó el padre guardián del convento de San Francisco, fray Juan Agustín Margil.

El día 30 en la noche se llevaron al cuartel a Nuestra Señora de Guadalupe que habían puesto en el zaguán de la cárcel, y la llevaron con hachas y muchos cohetes, en Sábado de Gloria.

El día 31 de marzo de 1782 en México, volvieron a montar guardia en la cárcel de Abajo los soldados del Regimiento de Milicias del Comercio. Y este día en México en el Real Coliseo, se presentó la comedia del Secreto a voces, y hubo orden de que entraran a ésta cuatro alabarderos cada día sin paga, cosa que nunca se había visto.

OÍbril de 1782

El día 1Q de este mes en México, en todos los conventos de la Orden de San Francisco y en otros muchos, se echó un repique general por la Mitra del padre fray Rafael Vergel, fernandino.

El día 4 de abril de 1782 en México, hubo en la Santa Iglesia Catedral una misa de gracias por orden de Su Majestad muy solemne, y asistieron todos los tribunales y dijo la misa el señor deán don Gregorio Miollo. Asistió el señor arzobispo don Alonso Núñcz de Haro y el señor virrey interino don Martín de Mayorga, y hubo tres descargas de cañones y tres de los granaderos del Comercio, y muchos repiques de campanas con esquilas, en jueves.

El día 5 de abril de 1782 en México, en la Santa Iglesia Catedral, hubo otra misa de rogación con el Santísimo patente, y se cantó la letanía de los santos y asistieron todos los tribunales como el día anterior, pero no hubo tiros. Dijo la misa el señor don Leonardo Terraya, en viernes.

El día 10 de abril de 1782 en México, en Palacio, en el real acuerdo, tomó posesión de oidor el señor alcalde de Corte don José Antonio de Urízar, siendo virrey el señor Mayorga y regente el señor Romá y Rosell, en miércoles.

El día 11 de abril de 1782 en México, en el Real Palacio en el Tribunal de Cuentas, tomó posesión de contador mayor el señor don Martín de Alegría, en jueves.

El día 16 de abril de 1782 en México, en la cárcel de la Acordada, hizo juramento y tomó posesión de capitán de la Santa Hermandad y juez de la Acordada y de Bebidas Prohibidas, el señor don Manuel de Santa María y Escobedo, ante el señor virrey interino don Martín de Mayorga y el secretario de Gobierno don fosé Gorraz, y fue el primero que tuvo este privilegio desde la fundación de la Acordada, que fue el año de diez de este siglo, y causó mucha novedad en esta ciudad por haber sido cosa que no se había visto. Dicho capitán era tercero de San Francisco, y fue en martes.

El día 20 de abril de 1782 en México, fue el capítulo en el convento de San Agustín y salió de provincial el padre doctor y maestro fray Pedro Bals. Y este día fue el capítulo también del oratorio de San Felipe Neri y salió de prepósito el padre don José Martínez.

Diario de sucesos de México • 97

El día 21 de abril de 1782, entró el Primer Escuadrón de los Dragones Provinciales de Querétaro, y el 23 entró el Segundo. Este mismo día salieron los últimos de Puebla, que eran los que estaban en esta ciudad en faena.

El día 28 de abril de 1782 en México, murió el señor canónigo de esta santa iglesia don Juan de Villavicencio, y el 29 por la tarde se enterró.

Nota

Este mismo día 29 en la noche pasaron al señor canónigo Villavicencio, esto es a su cuerpo, a San Francisco, y lo enterraron en la capilla de Nuestra Señora de la Macana, en lunes.

El día 2 de este mes en México, en el Cuerpo de Guardia de Alabarderos, se cobró la libranza de los sueldos de sus 24 miembros, que este mes llevaron un peso más de derechos en cajas reales, siendo antes 45 pesos cada año y ahora son 46. Y queriendo presentarse al señor virrey, fueron todos los más de los compañeros de parecer que no, y se quedó así, y fue siendo su capitán don Mariano de Velasco.

El día 9 de mayo de 1782, entró en México un correo de Veracruz con la noticia de haber llegado a aquel puerto los navios con los azogues que estaban en el Guárico, y éstos traían la noticia de la toma del castillo de San Felipe en puerto Mahon por nuestros españoles, y que el señor don Vicente Herrera, que era regente de Guatemala, viene con este mismo cargo a esta Audiencia.

El día 12 de mayo de 1782 en México, en la noche, llegó un correo de Veracruz con la feliz noticia de la toma del castillo de San Felipe en puerto Mahon, por lo que el día 14 se publicó con atabalillos o timbales en que se mandaba que por tres días se pusiesen cortinas y luminarias en las calles. El día 15 hubo misa de gracias en la Catedral y se cantó el te deum y se dispararon tres descargas y hubo repique de campanas con las esquilas del rey.

Nota

El general que ganó al puerto Mahon y al castillo de San Felipe, file el señor duque de Crillon. El día 15 de mayo de 1782 en México, en el Sagrario de la

Catedral, se estrenó el nuevo dorado del colateral mayor y un órgano que era de los padres jesuitas de San Pedro y San Pablo, y este “mismo día entró a dicho Sagrario el santo jubileo circular, y fue en día de Nuestra Señora de la Luz.

Nota

El día 14 de mayo se empezaron las luminarias en México por la toma del castillo de San Felipe en el puerto Mahon, y estuvieron muy malas. El día 15 fue la misa de gracias y no asistieron los prelados ni la Universidad. El día 16 fue el último de luminarias, pero todos los tres días estuvieron fatales.

El día 21 de mayo de 1782 en México, a las dos menos cuarto de la mañana, hubo un temblor muy bueno.

El día 30 de mayo de 1782 en México, día de Corpus, vinieron a pie el virrey y todos los tribunales desde la Catedral hasta Palacio, por no habef podido pasar sus coches por la mucha gente que había, cosa que jamás se había visto. Y este mismo día, se presentó en el Real Coliseo una comedia nueva llamada El escritor, pero de las más malas que se han hecho en México.

junio de 1782

El día 6 de este mes, fue octava de Corpus y asistió a la procesión el señor virrey don Martín de Mayorga.

El día 8 de junio de 1782 en México, sacaron de la cárcel de la Acordada cuatro hombres a los que les dieron 200 azotes, y éstos fueron los primeros que ajustició el capitán don Manuel de Santa María. Y este mismo día llegó de Vera- cruz el correo con las noticias de haber entrado a este puerto el navio de guerra San Francisco de Asir, la confirmación del combate erftre las escuadras francesa e inglesa; la muerte del señor conde de Aranda en Francia, y la cédula del retiro del señor regente de esta Real Audiencia don Francisco Romá y Rosell.

El día 11 de junio de 1782, me retiré de hacer la guardia de Rentería.

El día 14 de junio de 1782 en México, sacaron de la cárcel de Corte a un indio llamado Pedro Martínez para ahorcarlo, en viernes.

El día 17 de junio de 1782, entró a México el correo semanario con la feliz noticia de haber tomado el señor don Juan Manuel Cajigal a los ingleses, la isla de la Providencia. Y este mismo día, en México, en el convento de San Juan de Dios,

Diario de sucesos de México • 99

tomó posesión de comisario el padre prior fray Simón Sánchez, en lunes.

El día 22 de junio de 1782 en México, aprehendieron a un tercero de San Francisco llamado don Mariano Calderón, por haberle hallado con una muía en pecado bestial. El día 23 le quitaron el hábito en la cárcel.

El día 25 de junio de 1782 en México, en el Real Palacio, hubo una junta de doce sujetos para tratar sobre la Real Academia de Bellas Artes, y fue la primera que había habido acerca de este negocio, siendo virrey interino el señor don Martín de Mayorga y director de la Academia don Jerónimo Gil.

El día 27 de junio de 1782 en México, en el Real Palacio en acuerdo, tomó posesión de oidor el señor don Juan Antonio de Orihuela, siendo virrey interino el señor don Martín de Mayorga y regente el señor don Francisco Romá y Rosell, en jueves.

Los días 27 y 28 de junio de 1782 en México, en la Real Universidad, frieron las honras del señor doctor don Juan Ignacio de la Rocha, obispo que flie de Valladolid, y predicó la oración fúnebre el señor doctor don Juan Pérez Tejada, y el sermón lo dio el señor doctor Rangel, magistral de la Colegiata de Nuestra Señora de Guadalupe, y frieron en jueves y viernes.

El día 5 de este mes en Méx;co, en la Tercera Orden de San Francisco, sacaron el cuerpo de don Fernando Collantes que estaba enterrado hace más de cuatro años, y le hicieron un nuevo entierro en la capilla del Señor de Burgos; y asistió el Real Tribunal del Consulado.

El día 7 de julio de 1782 en México, en la iglesia del convento de las reverendas madres de la Enseñanza, se colocó un dedo de San Juan Nepo- muceno, con la asistencia del señor arzobispo don Alonso Núñez de Haro, y hubo una gran función en domingo.

El día 8 de julio de 1782 en México, entró el correo de España y no trajo cosa especial sino el ascenso del hijo del señor virrey a teniente coronel del Regimiento de Granada.

El día 13 de julio de 1782 en México, en el Cuartel de Milicias, la mujer de un soldado que estaba preso en el calabozo, mandó a su marido un jarro de champurrado con veneno, y éste sin saberlo convidó a dos de sus compañeros, uno de los cuales murió al día siguiente en el Hospital de San Andrés, y

los otros dos se salvaron del peligro. La causa fue que esta mala mujer tenía una amiga amachada con quien estaba en trato ilícito, la que la indujo a que envenenara a su marido. Por ello, el señor virrey ordenó que las pasaran a una y a otra a la cárcel de la Acordada.

Nota

El día 4 de febrero de 1777 en México, murió don Fernando González de Collantes, y se depositó su cuerpo el día 5 en la Tercera Orden del Señor San Francisco. El día 4 de julio de 1782 se sacó juntamente con el cuerpo de doña María de la Paz... mujer de don Servando dómez de la Cortina, y se pasaron y estrenaron ambos a la bóveda del Santo Cristo de Bringas de la capilla del Señor de Burgos de la nación montañesa. Dicho caballero gastó de su caudal en dicha capilla 22 mil pesos, y fue el que negoció que se habilitase; murió en tiempo del señor virrey don Antonio María de Bucareli.

El día 27 de julio de 1782, en el pueblo de San Ángel, murió doña Tomasa de Andrade, mujer de don Fernando Mcnsia, oficial real. La enterraron en una capilla nueva del Señor de Contrcras que se había hecho en el convento de los padres del Carmen que hay en dicho pueblo.

El día 29 de julio de 1782 en México, se publicó un bando por la Real Sala del Crimen y Real Audiencia que tenía seis pliegos, para que no hubiera casamientos desiguales.

i

Ojfgosto de 1782

El día 1Q de este mes en México, se cogió en la Casa de Moneda a un limador indio llamado Manuel Montes, que se robaba cada día treinta pesos con riesgo de su vida, pues por la mañana se metía quince pesos doblados en el intestino y otros tantos en la tarde. Este robo lo hizo por espacio de año y medio, pero es el más exquisito que se ha visto en dicha casa, siendo superintendente el señor don Fernando Mangino.

El día 2 de agosto de 1782 en México, en el Santuario de Nuestra Señora de los Ángeles, se puso el tesoro de la iglesia nueva que se está haciendo, y fue en viernes, siendo mayordomo perpetuo don José de Haro. Se echaron, muchas monedas de oro y plata y muchas piedras preciosas y perlas, y en la tapa de la

Diario de sucesos de México • 101

caja que es de piedra con chapas de plata, está el año, mes y día grabados con el nombre del rey y el virrey que gobernaban.

El día 6 de agosto de 1782 en México, se publicó un bando por la Nobilísima Ciudad para que todos los títulos de nobleza y republicanos salieran en el Pendón los días 12 y 13 de este mes, siendo virrey interino el señor don Martín de Mayorga, y corregidor el señor don Francisco Crespo. Este año sacó el Pendón don José Ángel de Aguirre.

El día 7 de agosto de 1782 en México, sacaron de la cárcel de la Acordada diez hombres, dándoles 200 azotes por salteadores de caminos.

El día 14 de agosto de 1782 en México, se le preguntó al señor virrey Mayorga si iba a salir el día 15 a la Catedral, día de la fiesta de la Asunción de Nuestra Señora, y dijo que no, y a la noche dijo que sí, por lo que fue preciso andar corriendo a avisar a los alabarderos y al mayor de la Plaza. Este día predicó el padre guardián de San Francisco fray Juan Margil, y este día pusieron arrestado a don Andrés Tientes, alabardero.

Nota

El día de la Asunción se colgaron todas las columnas de la Catedral, y fue la primera vez que se instalaron, siendo tesorero el señor canónigo don Gregorio Omaña.

El día 15 de agosto de 1782 en México, llegó la noticia de haber entrado a Veracruz nueve embarcaciones: una fragata de guerra y ocho registrados con caldos, ropa y frutas.

El día 20 de agosto en el Real Coliseo, se hizo de coca la comedia de La conquista de México, pero fueron tantas las mujeres que acudieron, que el administrador don Juan de San Vicente dispuso darles las bancas del patio, no sin antes pedir licencia al juez que lo era el señor oidor don Ruperto Luyando, quien dijo que no podía disponer nada sin dar parte al señor virrey Mayorga, con lo que se quedó chato el administrador, y fue en martes.

El día 21 de agosto de 1782 en México, en el Real Palacio en acuerdo, tomó posesión de alcalde de Corte el señor don Joaquín de la Plaza y Ubilla, pero por hallarse enfermo el chanciller don José de Jáuregui, la Real Audiencia dispuso que llevara el real sello el secretario de Cámara don José Mariano Villaseca, en miércoles. Este mismo día en México se publicó el bando del comercio libre de harinas, y que no se embargasen muías ni por cuenta del rey.

Nota

En el año de 1782 en México, en el convento de los reverendos padres de San Fernando, sucedió lo que no se había visto en este reino desde su conquista, y fue que del mismo convento y religión subieron tres obispos cuyos ijombres son los siguientes: don fray Antonio de los Reyes para Sonora, don fray Rafael Vergel para Arizpe, y don fray Juan Ramos para Maracaibo, esto es, todos tres juntos a un mismo tiempo y del mismo convento de San Fernando.

El día 25 de agosto de 1782 en México, en la Real Academia de Bellas Artes, durante los festejos del cumpleaños de la princesa de Asturias, el señor virrey pasó con toda la oficialidad y toda la nobleza de México a dar los premios a los profesores de pintura. Y este fue el primer día en que se dieron premios desde que se puso dicha academia, y fríe siendo virrey interino el señor don Martín de Mayorga y director de la Real Academia don Jerónimo Gil. Y este día, se estrenó el molino de pólvora en el pueblo de Santa Fe, tres leguas de México, en domingo.

El día 2 de este mes en México, en el barrio de la Alameda, en casa de un carpintero llamado Juan Rubio, se retocó una imagen de Nuestra Señora de Guadalupe del tamaño de tres cuartas de medio cuerpo, y fue tanto el alboroto que hubo, que acudieron los padres de San Francisco a la casa del carpintero a sacar a la Virgen y llevársela al convento de Corpus Christi, donde se quedó, en lunes.

El día 7 de septiembre de 1782 en México, asistió el señor virrey Mayorga al real acuerdo, siendo la primera vez que asistía, desde que era virrey hace tres años y dieciséis días, y fue en sábado. Y este día en México, se dieron las manos don Juan Casimiro de Osta y doña Josefa Rivas Cacho Cotera, y el día 8 fue la velación, en domingo.

El día 8 de septiembre de 1782 en México, entró el correo de España y con éste vino el señor marqués de Moneaba, y le llegó a don José de Castro el asiento de los naipes y la pólvora.

El día 10 de septiembre de 1782, entró en esta ciudad el señor don Vicente Herrera, regente que era de Guatemala, y vino a serlo de esta Real Audiencia de México, en martes.

Diario de sucesos de México • 103

El día 11 de septiembre de 1782 en México, en el Real Palacio en acuerdo tomó posesión de regente el señor don Vicente Herrera, pero fue tan violenta, que no se había visto así a otro señor de su rango tomar tan pronto posesión, en miércoles.

Nota

El señor don Francisco Romá y Rosell gobernó de regente en México 4 años, 5 meses y 29 días.

Nota

En el aviso que entró el día 8 de septiembre de 1782, vino la noticia de la muerte de la madre del señor arzobispo de México don Alonso Núñez de Haro.

Nota

Adviértese, que cuando salen los señores de la Real Audiencia, aunque todos vayan de capa con el señor regente no se les hace honores en Palacio, pero sí cuando van de toga.

El día 15 de septiembre de 1782, en el pueblo de Tacubaya, se consagró al señor don fray Antonio de los Reyes, uno de los obispos fernandinos que se va a Sonora. Quien lo consagró fue el señor arzobispo don Alonso Núñez de Haro, en domingo. Este mismo día en México, en la cárcel del Arzobispado, parió una de las presas y le dio un desmayo que quedó como muerta, y luego la sacaron y la pusieron en el cementerio de la Catedral, y como a las doce y media del día volvió en sí y pidió confesión y la confesaron. Murió en la tarde, por lo que la metieron en una bartolina, en domingo.

El día 17 de septiembre de 1782 en México, se acabaron de bajar las dos últimas campanas de la torre del Colegio de San Pedro y San Pablo, que fueron el esquilón grande y la campana mayor llamadas San Pedro y San Pablo y Señor San José, que estaban consagradas, y se las llevaron al Santuario de Nuestra Señora de Guadalupe, en martes.

El día 19 de septiembre de 1782 en México, en la Santa Iglesia Catedral, fueron las honras de la madre del señor arzobispo don Alonso Núñez de

Haro, y no asistió el señor virrey ni los tribunales, sino todos los depertdientes del Arzobispado y las comunidades religiosa^, en jueves.

El día 21 de septiembre de 1782 en México, en el convento de San Fernando, hizo las órdenes el señor obispo nuevo don fray Antonio de los Reyes, pero no asistió el señor arzobispo don Alonso Núñez de Haro, por hallarse un poco indispuesto. Y en este acto se ordenó un hijo de don Ignacio Ochoa, alabardero, en sábado.

El día 25 de septiembre de 1782 en México, en la cárcel de la Acordada, sacaron a doce hombres, dándoles 200 azotes por ladrones cuatreros, en miércoles.

El día 30 de septiembre de 1782 en México, en el convento de San Fernando, se confirmó mi ahijado Manuel José Guzmán, hijo de Manuel Guz- mán y de María Sarmiento, y fue el primero que confirmó el obispo nuevo don fray Antoniq de los Reyes, en lunes.

El 1Q de este mes en México, fue el primer día en que montó guardia en la cárcel de Corte el Regimiento de Granaderos del Comercio, en martes. Y este día salió de México al puerto de Veracraz el señor canónigo don Francisco Vives, para embarcarse a Europa, que iba a Roma con negocios de la Catedral y también con diligencias del padre fray Margil.

El día 3 de octubre de 1782 en México, sacaron de la cárcel de la Acordada a cuatro hombres para ajusticiarlos: tres ahorcados y uno de garrote. También sacaron a un negro dándole 200 azotes, al que pusieron debajo de la horca mientras se hacía la justicia. Estos hombres fueron los primdros que se ajusticiaron desde que era capitán don Manuel de Santa María, en jueves.

El día 5 de octubre de 1782 en México, sacaron de la cárcel de la Acordada doce hombres dándoles 200 azotes por ladrones cuatreros, en sábado.

El día 13 de octubre de 1782, en la Villa y Santuario de Nuestra Señora de Guadalupe, se puso el tesoro en la iglesia del convento de las madres capuchinas, y lo puso el señor arzobispo don Alonso Núñez de Haro con la asistencia de toda la nobleza de México. Fue el padrino el señor virrey interino Mayorga, reinando en las Españas el señor don Carlos III, y siendo síndicos el coronel don Francisco Fagoaga y su hermano don Juan Bautista,

Diario de sucesos de México • 105

en domingo. Este mismo día a las once de la mañana en el mismo santuario, murió el señor canónigo don N. Méndes Prieto, portugués.

Nota

Adviértese, que para esta función no fueron los alabarderos porque no quiso el señor virrey.

El día 14 de octubre de 1782 en México, trajeron a enseñar al señor virrey Mayorga una corona de oro guarnecida de esmeraldas que era para Nuestra Señora de la Soledad, de Oaxaca, que había costado diez mil pesos. Y este día nació mi ahijada María Josefa de la Concepción, Calixta, Fortunata Juana Nepomucena, hija de José Pío y de Manuela, y se bautizó el día 16 en el Sagrario de la Santa Iglesia Catedral.

El día 17 de octubre de 1782 en México, en el convento de San Francisco, murió un padre llamado fray José Góngora. Y este mismo día en el convento de los bedemitas, murió un padre jesuíta llamado Francisco Chávez, que era el último que había quedado en México. Pero la coincidencia es, que el padre franciscano y el jesuíta se ordenaron en un mismo día y murieron y se enterraron también en un mismo día, uno en San Francisco y el otro en Belén el día 18, en viernes.

El día 23 de octubre de 1782 en México, sacaron de la cárcel de Corte dos hombres para ahorcarlos, después de haber estado presos diez años. Uno se llamaba Guadalupe Tejeira, alias El Mosquito, y el otro José Pérez, alias Chana Pérez. A cuatro hombres más les dieron 200 azotes.

El día 24 de octubre de 1782 en México, sacaron de la cárcel de la Acordada ocho hombres, dándoles 200 azotes.

El día 26 de octubre de 1782 en México, sacaron de la cárcel de la Acordada a un hombre para ajusticiarlo y le dieron garrote por haber estropeado a una niña de siete años a la que mató. Y este mismo día salieron de las tres cárceles las cuerdas de presidiarios para Veracruz.

Nota

El ajusticiado citado arriba era del pueblo de Santa Fe.

t

f,

y\oviembre de 1782

El día 1Q de este mes en México, estrenaron su uniforme los oficiales de la Real Lotería, que es azul con vuelta y chupa encarnada y alamares de plata. Y fiie siendo virrey interino el señor don Martín de Mayorga y director interino de dicha lotería don Juan Ordóñez.

El día 2 de noviembre de 1782 en México, murió don Juan Bautista Al- daza, teniente coronel del Regimiento de Comercio de México, y se enterró el día 4, día de San Carlos, en el convento de San francisco. Su muerte fue en sábado y su entierro en lunes, en el que marcharon cuatro compañías de su regimiento, que por causa de la guerra estaba sobre las armas.

El día 7 de noviembre de 1782 en México, sacaron de la cárcel de Abajo a un cochero, dándole 200 azotes, por haber puesto el 1° de este mes manos violentas en un sacerdote llamado don Pedro Garduño.

El día 14 de noviembre de 1782 en México, en la Santa Iglesia Catedral, fueron las honras de los militares y predicó el doctor don Joaquín Gallardo, cura interino de la parroquia de Santa María la Redonda.

El día 15 de noviembre de 1782 en México, en el Sagrario de la Catedral, le levantaron la excomunión en viernes al cochero José Venancio, mismo que la noche de Todos los Santos agredió violentamente al padre don Pedro Garduño.

El día 21 de noviembre de 1782 en México, en el Real Palacio, se acabó en la rodaja una ventana que dio luz a todo* el cuarto y al callejón que parecía bartolina, en jueves.

El día 25 de noviembre de 1782 en México, entró el correo de Guatemala, y trajo la noticia del ascenso a teniente general para el presidente de dicha audiencia, señor don Matías de Gálvez.

élOiciembre de 1782

El día 4 de este mes en México, salió para Veracniz el primer trozo del Regimiento de Pardos, y el día 6 el segundo y el día 9, el tercero y último.

El día 5 de diciembre de 1782 en México, se hizo la primera rifa de las

religiosas de la Enseñanza de 24 suertes, y ésta fue por orden del rey, siendo virrey interino el señor don Martín de Mayorga, en jueves.

Nota

Adviértese que los premios de la rifa de la Enseñanza fueron como sigue: uno de a 100 pesos, dos de a 25, tres de a 16, cuatro de a 10 y catorce de a 6 pesos.

El día 6 de diciembre de 1782 en México, se pasó la limosna de Nuestra Señora de la Concepción para la capilla de los Alabarderos, y quienes la pedimos fuimos yo, José Gómez y don Juan de Torres, por haberse opuesto don Juan de Zapata que quería salir el último día en Palacio, y fue siendo mayordomo don Francisco del Villar y capitán don Mariano de Velasco.

El día 10 de diciembre de 1782 en México, se publicó el bando para dividir esta ciudad en ocho cuarteles mayores, y en cada uno de éstos un alcalde.

El día 11 de diciembre de 1782 en México, se colocó en el zaguán del Real Palacio una imagen de Nuestra Señora de Guadalupe de medio cuerpo, costeada por los cabos de Escuadra del Regimiento Urbano del Comercio, y se hizo una función muy grande, en miércoles.

Nota

Este día 11 en la noche, se trajo en procesión a Nuestra Señora de Guadalupe desde el cuartel del Regimiento del Comercio, en esta forma: primero, los soldados de Corte, luego los cabos, luego los sargentos y toda la oficialidad con la música de los regimientos que había en México, a saber: de las Milicias y los Dragones que eran los provinciales de Querétaro y la del Regimiento Urbano del Comercio.

El día 15 de diciembre de 1782, salió de México para Veracruz el primer trozo de las Milicias de Toluca; el día 17 el segundo y el día 18 el tercero, siendo su coronel el señor conde de la Torre de Cossío, don Juan Manuel González de Cossío.

El día 26 de diciembre de 1782 en México, entró el correo de España y no trajo más novedad que la de que al señor don Miguel de Gálvez, hermano del señor ministro don José, lo habían hecho ministro de Gracia y Justicia. También vino en este correo la cédula con el nombramiento de regente de

Guatemala para el señor don Juan Antonio de Orihuela, oidor de la Real Audiencia de México, y fue en jueves.

El 29 de diciembre de 1782 en México, en el Real Palacio, le puso el señor virrey la cruz de la distinguida Orden de Caídos III a don Felipe del Fierro, director general de la Renta del Tabaco, en domingo.

Nota

Adviértese que quien leyó la cédula en este acto fue el señor don Juan Martínez de Soria, secretario segundo de Gobierno, por estar enfermo el primero, señor don José Gorráez.

El día 30 de diciembre de 1782 en México, en el Real Palacio, entraron como 300 hombres y mujeres de la Fábrica del Tabaco, pidiendo que les dieran trabajo, y en casa del señor director don Felipe del Fierro, se arrojaron como 200, por lo que mandó el señor virrey que lo era interino don Martín de Mayorga, que el día 31 entraran a trabajar. ,

El día 31 de diciembre de 1782 en México, se presentaron los primeros alcaldes de barrio, cuatro al señor virrey que eran los que correspondían al señor alcalde de Corte don Juan Antonio de Anda, con sus uniformes de casaca y calzones azules, chupa y vuelta encarnada con un alamar sólo en la vuelta de plata, y fue en martes.

Q^Sño de 1783. Enero

El día Io de este mes en México, salieron de alcaldes ordinarios de Primer Voto, el señor don Joaquín Chacón, sobrino del señor arzobispo don Alonso Núñez de Haro, y de Segundo Voto, el señor don Bernardo de la Torre, y fue en miércoles, siendo virrey interino el señor don Martín de Mayorga, y corregidor el señor don Francisco Crespo. Este mismo día se presentaron al virrey los 32 alcaldes de barrio; cosa que desde que se conquistó este reino no se había visto.

El día 3 de enero de 1783 en México, se previno a las once del día sacramentar al señor inspector don Pascual de Cisneros, teniente general, y por haberse privado se dejó para la noche, que recibió a su Divina Majestad que

vino en la estufa del señor virrey, y fue toda la oficialidad con que resultaron muy lucidos los sacramentos. Dicho señor estuvo malo de insulto, y fue siendo virrey interino el señor don Martín de Mayorga, en jueves.

El día 4 de este mes en México, en la Casa de Moneda, erraron uno de sus troqueles, de suerte que en lugar de poner año de 1783, pusieron año de 1873, con que adelantaron un siglo, por lo que se mandó recoger toda esta moneda, siendo superintendente de dicha casa el señor don Fernando Mangino, y virrey el señor don Martín de Mayorga.

El día 9 de enero de 1783 en México, entró un correo de Veracmz con la fatal noticia que en la isla del Sacrificio se había perdido una embarcación, y que se había ahogado toda su tripulación.

Nota

Por el correo arriba citado, pudimos precisar que la embarcación era una balandra que venía de La Habana, despachada por el señor Solano con un pliego para el virrey Mayorga, y que los ahogados de la tripulación fueron sólo cinco, porque los demás se rescataron pero muy maltratados.

El día 11 de enero de 1783 en México, en el Tribunal de Cuentas, tomó posesión de contador el señor don Manuel de Campo Marín, y asistió el señor virrey que era interino, don Martín de Mayorga, en sábado.

El día 17 de enero de 1783 en México, bendijo el señor arzobispo don Alonso Núñez de Haro, la iglesia nueva de la Santísima Trinidad, y pasó de la iglesia vieja en procesión el Santísimo Sacramento. El 18, día de la cátedra de San Pedro, se estrenó y dijo la misa el señor arzobispo y predicó el doctor don José Uribe, cura del Sagrario de la Santa Iglesia Catedral, y fue en viernes y sábado.

El día 27 de enero de 1783 en México, murió la señora doña María Francisca de Pablo, marquesa de Prado Alegre, mujer del señor Norberto Menocal, en lunes.

El día 28 de enero de 1783 en México, murió la señora doña María de la Asunción Guaros, marquesa de Salvatierra, y fueron al entierro la Audiencia y la Nobilísima Ciudad, y a la noche del día 29 en que fue el sepelio en San Agustín, la llevaron al Santuario de Nuestra Señora de Guadalupe, donde el día 30 le dieron sepultura.

El día 30 de enero de 1783 en México, sacaron de la cárcel de Corte un

hombre para ahorcarlo, llamado José de la Cruz Báez, por haber estrangulado a su mujer y haberle dado veneno a su suegra, en jueves.

I

Nota ,

Adviértese que este ajusticiado de arriba fue encubado y luego lo llevaron a la Real Universidad para hacer anatomía de su cuerpo, y luego le cortaron la cabeza y la llevaron al pueblo de Huamanda en donde hizo su delito.

El día 31 de enero de 1783 en México, entró el correo de España, pero con las noticias más infaustas que se pudieran esperar, pues trajo la de haber entrado socorro del enemigo en la plaza de Gibraltar, y el combate que tuvo nuestra Armada con la inglesa trajo mucha gente muerta y otras varias noticias todas malas, en viernes.

, {^febrero de 1783

El día 10 de este mes en México, a las doce de la noche, murió el señor don Nicolás Galante y Saavedra, inquisidor mayor del Tribunal del Santo Oficio, en lunes.

El día 11 de febrero de 1783 en México, se sacaron de la cárcel de la Acordada 16 hombres dándoles 200 azotes por varias causas, siendo capitán de dicha prisión don Manuel de Santa María, en martes.

El día 21 de febrero de 1783 en México, en el Santuario de Nuestra Señora de Guadalupe, en unos cimientos que estaban abriendo a espaldas del altar mayor donde está la Santísima Virgen, en el pie del cerro, salió un venero de apa muy hedionda a los principios y después se aplacó un poco el hedor, y de allí salió una grasa que era de aceite muy bueno, pues se hicieron todas las experiencias posibles para probarlo, como encender mechas'con él y dio buena luz, por lo que se recogió cierta cantidad que le trajo el señor arzobispo al virrey Mayorga en una botellita. En ese tiempo en dicho santuario estaban haciendo el convento para las reverendas madres capuchinas. Y este día 21, trajeron preso a el amo de la tienda de Palacio don José Contade, por haberse huido por una quiebra que había tenido de 32 000 pesos, en que quedaron enredados muchos sujetos, y fue en sábado.

El día 27 de febrero de 1783 en México, murió el ilustrísimo señor

don Domingo Belaunzarán, oidor que había sido de esta Real Audiencia y el ministro más antiguo, esto es, el decano de todas las audiencias que tiene España en todos sus dominios, camarista de Su Majestad, auditor de Guerra que había sido en este reino. Murió en jueves y se enterró el día 28 del mismo en el convento de Nuestra Señora de la Merced, entierro de lo más lucido que se ha visto. Fue también colegial real del Colegio de San Bartolomé de Salamanca en los reinos de Castilla, y el primer camarista que murió en estos reinos: tenía de edad 96 años.

El día 28 de febrero de 1783 en México, salió la cuerda de todas las cárceles para presidio, en sábado por la mañana.

arzo de 1783

El día 4 de este mes en México, martes de carnestolendas, en el Real Coliseo, habiendo acabado Felipa La Gata de cantar muy bien la tonadilla de La Jardinera, le tiraron una taleguita con tlacos. A esta cantante la protegía la esposa del inspector don Pascual Cisneros, y fue tanta la pesadumbre que recibió dicha señora cuando lo supo, que se acababa de ir, que luego mandó a despedir el palco y dijo en presencia del virrey y del administrador del Coliseo que lo era don Juan de San Vicente, que no pondría más sus pies en aquel escenario.

El día 9 de marzo de 1783 en México, mató un soldado miliciano a un granadero del Comercio, y el día 10 del mismo pusieron al asesino en libertad por orden del señor virrey, cosa que dio mucho que murmurar en esta ciudad, pues ni se había enterrado todavía el difunto.

El día 11 de marzo de 1783 en México, en la Santa Iglesia Catedral, tomó posesión de canónigo el señor don Félix Venancio Malo. Este señor fue muchos años oidor y subdecano de esta Real Audiencia, en martes.

Nota

En el mes de febrero del año de 1783 en México, en la portada vieja de la iglesia de San Felipe Neri, había dos imágenes de San Juanes, una de San Juan Bautista y otra de San Juan Evangelista. Estos dos santos empezaron a hacer milagros, por lo que los compusieron y concurría mucha gente con velas y milagros de cera y plata.

112 • José Gómez > ^

El día 17 de marzo de 1783 en México, en el Real Palacio, vimos lo que no se había visto y fue que hubo dos acuerdos en la tarde, uno en la Real Audiencia y otro en la Sala del Crimen. Esto último no se había visto nunca y desde este día empezó a haberlo todas las semanas en dos días, lunes y jueves, siendo regente el señor don Vicente de Herrera.

El día 24 de marzo de 1783 en México, entró el correo de Guatemala con la noticia de que el señor don Matías de Gálvcz traía 16 días de camino, y que venía a relevar de virrey al señor Mayorga.

El día 30 de marzo de 1783 en México, entró el correo de España con la noticia de que había llegado felizmente a La Habana un tesoro, y la prórroga de cinco años más a don Juan de Villalba como corregidor de Querétaro.

i

Qñril de 1783

El día 6 de este mes en México, en todas las iglesias se leyó el edicto por el señor arzobispo, en que se mandaba que a los confesionarios se les echase unas rejillas de hoja de lata con agujeros muy menudos, y que no tuvieran conversación las mujeres con los confesores y todas estas fueran tapadas. Mandóse también que en los conventos de monjas estuvieran todas las puertas de los confesionarios abiertas.

El día 7 abril de 1783 en México, se presentó al virrey interino Mayorga un individuo que venía de España con una real cédula nombrándolo visitador de Boticas y Hospitales, cosa que no se había visto jamás y fue en lunes. .

El día 11 de abril de 1783 en México,,se descubrió un caso por milagro de Nuestra Señora de los Dolores, y fue que don Enrique Pasallos estaba amancebado con una mujer casada, y entre este sujeto y otros dos se apoderaron del pobre marido, lo amarraron, le vendaron los ojos y lo metieron en un cuarto donde lo tuvieron tres meses dándole muy poco de comer y de beber, de suerte que estaba casi muerto y junto a él habían abierto una sepultura para enterrarlo cuando muriese. Mas pasando por allí el alcalde de Primer Voto don Bernardo de la Torre con sus ministros, descubrió este hecho y rescató a la víctima, y se están haciendo diligencias y buscando a los culpables que se huyeron, para castigarlos.

El día 12 de abril de 1783 en México, en la cárcel del Arzobispado, casó el señor arzobispo don Alonso Núñez de Haro a una india y un indio llama-

Diarin de sucesos de México *[[7]](#footnote-7)113*

dos María del Carmen y él, Lorenzo de la Cruz, feligreses de la parroquia de la Santa Veracruz, que estaban presos por amancebados y no haberlos casado el cura don Teodoro Martínez porque no tenían para pagar los derechos.

El día 19 de abril de 1783 en México, se bautizó en el Sagrario de la Catedral una hija de don Rafael Basco, teniente coronel del Regimiento de Asturias y castellano interino de Acapulco: fue padrino en representación del virrey Mayorga, don Francisco Crespo, corregidor de México, con la asistencia de toda la nobleza de esta ciudad. Y se le puso a esta niña por nombres María Anastasia.

Gobierno del virrey Matías de Gálvez

El 29 de abril de 1783 en México, a las once del día, tomó posesión de virrey en el real acuerdo el señor don Matías de Gálvez, para relevar de su cargo interino a don Martín de Mayorga. Y fue siendo regente de Nueva España don Vicente de Herrera.

El día 30 de abril de 1783 en México, le trajeron a enseñar al nuevo virrey tres criaturas todas varones, uno vivo y dos muertos que había parido una india de la parroquia de Santa Cruz.

El día 2 de este mes en el Real Palacio, estando bajando los retratos de los señores virreyes que los habían traído de la Diputación para componer la sala del baile, ya que habían bajado casi todos, faltaba el del señor Mayorga que se cayó desde lo alto de la escalera y se medio rompió, cosa que se hizo mucho notar.

El día 7 en México a las tres de la tarde, entró el correo de España con la feliz noticia de la paz entre las coronas de España y Francia con Inglaterra, y en este aviso le vino al señor don Servando Gómez de la Cortina, vizconde de San Servando y conde de la Cortina, títulos de Castilla exentos de media anata.

El día 8 de mayo de 1783 en México, en la Catedral, fue la misa de gracias por el aviso de España a la que asistió el señor virrey Matías de Gálvez, y fue la primera salida pública que éste hizo teniendo como guardias de sitial a los alabarderos José Moreno el grande y yo, José Gómez, y fue en jueves. •

El día 16 de mayo de 1783 en México, en el Real Palacio, fue la primera junta que tuvo el señor virrey Matías de Gálvez, y el día 17 su primer bando para que se remitiesen caudales a España.

El día 19 de mayo de 1783, salió de esta ciudad de México para España el señor mariscal de campo don Guillermo Warghan.

. Nota

En la última semana del mes de mayo de 1783 en México, sucedió un caso muy memorable y fue, que don Francisco Montes de Oca que tenía un cajón de comercio en el número 26 de la calle nueva de San José, era fraile franciscano fugitivo desde hacía muchos años hasta que Dios le tocó el corazón, y él mismo se denunció con el prelado del convento de San Francisco, donde le volvieron a dar su hábito y su patente para el Colegio de Toluca.

^unió de 1783

El 1s de este mes en México, en el convento de Santo Domingo, hubo un auto de fe en el que salieron del Tribunal de la Inquisición trece reos, diez hombres y tres mujeres, dos por blasfemos, dos por celebrar misa sin haberse ordenado, y los demás por casados dos veces. Y este mismo día el señor virrey pasó a la Real Academia de Bellas Artes y otorgó por primera vez los premios.

El día 2 de junio de 1783 en México, pasó la señora virreina doña Ana de Sayas al Tribunal de la Inquisición, ahí vio los trece reos que había en sus cárceles. En suma, no hubo rincón de este tribunal que no le enseñaran, después del cual le dieron un almuerzo muy especial.

El día 8 de junio de 1783 en México, a las nueve de la noche, entró el correo de España con la fatal noticia de que había perdídose en la costa de Campeche el navio Dragón, ahogándose ciento y tantos hombres, entre ellos muchos soldados del Regimiento de la Corona, y también vino noticia de que el rey había concedido título de Castilla a don Bernardo de Gálvez, hijo del virrey don Manas de Gálvez, llamándole conde de Gálvez.

El día 14 de junio de 1783 en México, murió ef señor don Diego Solís y Villavicencio, caballero del Hábito de Cristo y alférez de los Alabarderos; se enterró el día 15 en el convento de San Agustín.

Diario de sucesos de México • 115

El día 17 de junio de 1783 en México, nombró el virrey Matías de Gál- vez para la plaza de alférez de Alabarderos al cabo de Escuadra don Francisco del Villar. Y este mismo día, entró a la ciudad de México el Batallón de Milicias de Toluca que venía de Veracruz, cuyo coronel era el señor don Juan Manuel González de Cossío, conde de la Torre.

El día 22 de junio de 1783 en México, en el pueblo de Tacubaya, el arzobispo don Alonso Núñez de Haro consagró a dos obispos fernandinos, el padre Ramos y el padre Vergel, y fue en domingo.

El día 28 de junio de 1783 en México, en el Real Palacio, tomó posesión de alférez de la Compañía de Alabarderos don Francisco del Villar, se incorporó a esta compañía don Juan José de Vera y Villanueva, y fue nombrado cabo de la misma don Juan Alberto Badamés.

El día 3 de este mes en México, sacaron de la Acordada dos hombres para darles garrote, y uno de ellos después de muerto fue el primero en ser arrastrado y encubado por este tribunal.

El día 7 de julio de 1783 en México, llevaron preso de Tepotzotlán al doctor don Gregorio Pérez Cando, cura de la parroquia de la Soledad de Santa Cruz, por órdenes del arzobispo don Alonso Núñez de Haro.

El día 11 de julio de 1783 en México, se publicó un bando con mucha ostentación y atabales, al que asistieron los gobernadores de indios, los alcaldes de barrio, los dependientes de tribunales y tropa de dragones del Regimiento de México, llevando con respeto la estufa o coche del señor oidor don Baltasar Ladrón de Guevara, juez de Tributos, con motivo de que el rey perdonó los adeudos atrasados que le debían a Su Majestad los indios pobres.

El día 30 de julio de 1783 en México, sacaron de la cárcel de la Acordada nueve hombres a los que les dieron 200 azotes por ladrones y portadores de armas cortas.

FJ día 31 de julio de 1783 en México, pasaron del Cuartel de Dragones a la cárcel de Corte a un soldado llamado Justo Rufino Alvarado.

- tyfgosto de 1783

El día 4 de este mes, fue ahorcado en la Plaza Pública el soldado ya referido del Regimiento de Dragones, y en el término de una hora fue ajusticiado y enterrado en el Sagrario de la Catedral.

El día 5 de agosto de 1783 en México, en el Real Palacio, el señor virrey condecoró a dos indios mecos comanches con una medalla que tenía la cara del rey Carlos III, después de haberlos vestido muy bien, en martes.

El día 8 de agosto de 1783, treinta dragones de México trajeron preso a la cárcel de Corte a don Enrique Pasallos, que lo sacaron de la iglesia del pueblo de San Mateo Ateneo, jurisdicción de Chalco.

El día 9 de agosto de 1783 en México, en la puerta de la Santa Iglesia Catedral, amanecieron puestos por públicos excomulgados por la causa de don Enrique Pasallos, el capitán de la sala don Vicente Elizalde, el teniente de Dragones de México don Juan Rendón, V el secretario don Rafael Lucero. Estuvieron sus nombres hasta el día 11 a las diez del día. Y fue siendo arzobispo de México el señor don Alonso Núñez de Haro, provisor el señor Primo de Rivera, y virrey interino el señor don Matías de Gálvez.

El 10 de agosto de 1783 en México, entró el señor visitador del Perú y de Santa Fe don José Antonio Areche, en domingo.

El 11 de agosto entró en México el correo de España y no trajo cosa especial. Y este día murió el doctor don Teodoro Martínez, cura de la parroquia de la Santa Veracruz, que estuvo enfermo un mes y 8 días.

El día 12 de agosto de 1783 en México, fue el Paseo del Pendón y no participó en él el virrey, y se puso la vela que es costumbre colocarla en el balcón principal, en el balcón de la puerta chica, que nunca se había visto.

El día 23 de agosto de 1783 en México, a las doce de la noche, Rieron a sacar de tres iglesias los retraídos a la cárcel de Corte. A San Miguel Ríe don Juan Francisco de Anda, a Santa Catalina don Joaquín de la Plaza, y a Santa María, don Simón Antonio de MiraRientes, todos alcaldes de Corte, y sacaron de las dos primeras iglesias treinta y dos hombres, y de la otra cinco mujeres, en sábado.

El día 26 de agosto de 1783, entró a México el padre comisario de San Juan de Dios que vino de España, y en la tarde en el Real Palacio, se abrió

Diario de sucesos de México • 117

la audiencia y vinieron los oidores y fueron llamados los oficiales de todas las oficinas, y se les tomó juramento de guardar secreto en todos los asuntos que ocurriesen en sus oficinas, acontecimiento que nunca se había visto. Y este mismo día en México, fui yo, José Gómez, a la calle de los Medinas a la casa del canónigo doctor don Manuel Ignacio de Cisneros, a ver un carnero maestro que tenía cuatro campañones, dos vergas y dos intestinos, y por las cuatro vías hacía su necesidad. Tenía cinco pies, el tmo más pequeño que los otros cuatro, y tenía no pezuñas sino cuatro uñas a modo de león, cosa muy especial, que si no lo hubiera visto no lo creería.

[ J^eptiembre de 1783

El día 6 de este mes en México, en el Puente de Correo Mayor, cayó un rayo y mató a una mujer y maltrató a un muchacho, en sábado.

En 9 de septiembre de 1783 en México, se vio lo que nunca se había visto y fue, que sacaron de la Acordada a 42 hombres dándoles 200 azotes y rematados para presidio; pasando los reos enfrente de Palacio, venía su Divina Majestad por la calle del Reloj, y tuvieron que llevarlos por el Arzobispado, en martes.

El día 10 de septiembre de 1783 en México, fiie la primera rifa de billetes de la Real Lotería que se hizo para el Hospicio de Pobres, en miércoles.

En día 14 de septiembre de 1783 en México, en el Real Palacio, una de las damas de la virreina llamada doña Manuela de Flores y Arana, quebró un espejo y se huyó a la calle.

El día 15 de septiembre de 1783 en México, salió la cuerda para presidio en lunes.

El día 19 de septiembre de 1783, entró el correo de España y en éste les vino su canonjía al doctor Valdés y al doctor Uribe.

El día 26 de septiembre de 1783, entró a México el caballero don Teodoro de Croix, teniente general que iba de virrey al Reino del Perú y venía de Chihuahua.

El día 29 de septiembre de 1783 en México, entró el correo de Guatemala con la fatal noticia de que el día 4 del mismo, hubo unos temblores tan fuertes cuales no se habían visto otros en aquella latitud.

El día 30 de septiembre de 1783, salió de México para España el padre visitador de San Agustín, fray Agustín Simonena, en martes.

C.0'ctnbre de 1783

El día 1Q de este mes en México, salió en dos carros el dinero de la Redención de Cautivos con mucho acompañamiento de atabalillos y clarines, y llevaban hasta cien mil pesos que entregaron a la casa del conductor de plata, don Pedro Vértiz.

El día 7 de octubre de 1783, salieron de México del Real Palacio, los señores brigadier don Miguel de Sousa y el coronel don Lucas de Gálvez, ambos oficiales de Marina. ,

El día 8 de octubre de 1783 en México, amaneció muerto don Ignacio Ochoa, alabardero que había servido seis años y siete meses, y fue enterrado al día siguiente solemnemente en el convento de San Francisco.

El día 12 de octubre de 1783, entró a México a las once del día el Primer Batallón de la Corona, siendo su coronel don Juan Cambiazo. Esta tropa vino a relevar al Regimiento del Comercio que estaba sobre las armas hacía dos años, mientras duró la guerra.

El día 15 de octubre de 1783, recibió la guardia del Real Palacio el capitán del Regimiento de la Corona don José Ceda, y se le entregó el del Comercio a don Francisco Rábago.

En 17 de octubre de 1783, salió de México para España el señor don

Pascual Cisneros, inspector que fue de este reino, y se llevó a Felipa La Gata,

una de las mejores músicas del Coliseo.

*

El día 20 de octubre de 1783 en México, en ql convento de San Francisco, murió a las nueve y media de la mañana el padre guardián fray Juan Margil, el hombre más grande que tenía la provincia y el mejor orador que había en el reino, y fite lunes.

El día 26 de octubre de 1783 en México, dio el señor virrey la plaza de inspector interino al señor don Francisco Crespo, corregidor de esta ciudad, y dio el título de coronel de Tehuantepec a don José Bejarano, y el de coronel de Oaxaca a don Juan Francisco Echarri.

El día 27 de octubre de 1783 en México, en el real acuerdo, tomó posesión el señor oidor don Joaquín Galeana, siendo virrey el señor don Matías de Gálvez y regente don Vicente de Herrera.

El día 28 de octubre de 1783 en México, en el Paseo de Jamaica, se

' Diario de sucesos de México • 119

hizo el primer ensayo de toros y se cayeron tres andamios y hubo muchos lastimados. Y este día, en el zaguán del Real Palacio, cayó muerto el oficial de las reales cajas don Fernando Mesia, y subieron su cuerpo a la casa del señor secretario don Félix del Rey, y de allí salió su entierro al día siguiente para el convento de San Agustín.

El día 30 de octubre de 1783 en México, en el Real Palacio, hubo una gran novedad, y fue que el coronel don Juan Cambiazo vino a reconvenir al señor virrey, porque le había dado la inspección al señor Crespo en lugar de a él, siendo más antiguo, por lo que el señor virrey se enfadó mucho y lo mandó arrestar, y le dijo que en el término de 24 horas había de salir con el Batallón de la Corona de México, por lo que las Milicias del Comercio vinieron a montar la guardia en Palacio, y después llegó el señor arzobispo y lo compuso con el virrey.

El día 4 de este mes en México, en el Real Palacio, se dieron los premios de la Academia de Bellas Artes, uno de ellos a una mujer pintora que hizo una cabeza que parecía romana. Dicha mujer se llamaba doña María Cruz de la

Espada.

El día 13 de noviembre de 1783 en México, sacaron de la cárcel de Abajo a dos mujeres emplumadas por alcahuetas, y luego las pusieron enfrente de la cárcel de Corte en un tablado, donde las tuvieron hasta las dos y cuarto de la tarde, en que las bajaron y se las llevaron a la Casa de Recogidas.

El día 15 de noviembre de 1783 en México, fueron las honras fúnebres de los militares en Catedral, a las que no asistió el virrey y presidió el señor inspector don Francisco Crespo, en sábado.

El día 17 de noviembre de 1783 en México, comenzaron las corridas de toros y fueron los comisionados don Antonio Velasco y don José su hermano, los hombres más miserables que tenía esta ciudad, y fueron cuatro días de la primera semana.

El día 19 de noviembre de 1783 en México, entró el correo de España, y en éste le vino al virrey don Matías de Gálvez su nombramiento en propiedad, en miércoles.

El día 23 de noviembre de 1783, en la iglesia de las capuchinas de México, se cruzó de caballero de Santiago al alcalde mayor de Tehuantepec

don Tomás Morillero, y fue su padrino el señor marqués de San Miguel de Aguayo.

El 27 de noviembre de 1783 en México, fue el último día de toros y hubo un volador pero muy malo. Y aunque en la mañana fueron notificados los comisionados con pena de excomunión mayor por un notario del Arzobispado, para que no hubiera tal volador porque estaba podrido, con todo lo hubo, en jueves.

El día 30 de noviembre de 1783 en México, fue la publicación de la bula en domingo.

^Diciembre de 1783

El día 3 de este mes salió de México para Acapulco, y de allí para Lima donde iba de virrey el caballero don Teodoro de Croix, en miércoles.

El día 5 de diciembre de 1783 en México, sacaron de la cárcel de la Acordada treinta y cinco hombres, dándoles 200 azotes y rematados por diez años a presidio. Y al día siguiente 6, de la misma cárcel, sacaron para ajusticiarlos a tres hombres y una mujer, llamada ésta María Murguía. Dicha mujer era rica, pues testó 18 000 pesos, y fue ahorcada, arrastrada y encubada, porque entre ella y su galán habían matado a su mando. Y aunque después de haber sido ahorcada al bajar el cuerpo de esta mujer se movió estando en el suelo, alborotando a toda la gente, por lo que corrieron por el Santo óleo, fue en balde, porque ya estaba muerta. Después volvieron a la cárcel por los tres hombres restantes, de los cuales uno vino en burro y los otros en serón; el del burro recibió garrote y los otros dos fueron ahorcados y encubados. Todo esto fue siendo capitán de la Acordada don Manuel de Santa María.

El día 8 de diciembre de 1783 en México, en el convento de San Francisco, se estrenó el colateral mayor y hubo muy buena función a la que asistió la Compañía de Granaderos del Comercio, en lunes.

Nota

I

Razón de la limosna que se juntó en cuatfo mañanas para la Virgen de la Concepción este año, por los alabarderos don José Gómez y don Juan de Torres, esto es, setenta y siete pesos y dos reales.

Diario de sucesos de México • 121

El día 15 de diciembre de 1783 en México, por mandato del virrey don Matías de Gálvez, fueron dos alabarderos, don Juan Zapata y don Juan del Villar, a traer preso a la Sala de Cabildo a don Juan Barberi, capitán que había sido de la Acordada, en lunes.

El día 17 de diciembre de 1783 en México, entró el correo de España con la noticia de haber parido la princesa de Asturias dos infantes hombres de un solo parto. También trajo la noticia de haber muerto en el mar, el 28 de julio de este año, el señor don Martín de Mayorga, virrey que había sido interino de esta Nueva España.

El día 20 de diciembre de 1783, a las doce horas, entró a México un extraordinario de San Blas con la noticia de haber arribado a aquel puerto la nao de China.

El día 22 de diciembre de 1783 en México, sacaron de la cárcel de la Acordada dos hombres para ahorcarlos. Uno se llamaba Juan Puebla y el otro Cristóbal Melgarejo. Este era cochero de don Pedro Vértiz y había robado una cantidad respetable de dinero.

El día 23 de diciembre de 1783, sacaron de la Acordada 29 hombres por las calles públicas, dándoles 200 azotes, en martes.

El día 27 de diciembre de 1783 en México, se publicaron con atabalillos los tres días de luminarias por el parto de la princesa de Asninas de los gemelos Carlos y Felipe, y frieron estos tres días 28,29 y 30. El día 29 celebró la misa de gracias de pontifical el señor arzobispo don Alonso Núñez de Haro, y durante estos días hubo tres comedias que se hicieron de balde, siendo la primera El desdén con el desdén, la segunda No puede ser guardar una mujer, y la tercera El amo criado, siendo administrador del Coliseo don Juan de San Vicente.

El día 10 de este mes en México, salieron de alcaldes ordinarios de Primer Voto don Isidro de Icaza, y de Segundo don José de Orduño. Y este día en el Real Palacio, en el Cuerpo de Alabarderos comenzóse a montar la guardia con las armas en la mano, y púsose un libro de ordenanzas para que en él todos los días se hiciera parte.

El día 5 de enero de 1784 en México, entró el Regimiento de Zamora, y el día 6, festividad de los Santos Reyes, entró a hacer guardia en Palacio, [[8]](#footnote-8)

donde estaba el Regimiento de la Corona.

El 12 de enero de 1784, se observó un cometa de cauda blanca al sur de México, pero que giraba de poniente a oriente.

El día 14 de enero de 1784 en México, se publicó un bando para traer a Nuestra Señora de los Remedios, para aplacar a la peste de dolor de costado que ha ocasionado muchas muertes en esta ciudad, tantas que en un solo día, entre ricos y pobres frieron enterradas más de veinticinco personas en el Sagrario de la Catedral. Y este día, salió la primera Gaceta de México compuesta por don Manuel Valdés, y se hizo en el Real Coliseo la comedia: También hay dudo en las damas, y acabada la segunda jornada salió Loreto a bailar el Pan de Manteca, y pidiendo el público otra copla no quiso salir, y prosiguiendo el patio a pedir salió el gracioso y dijo que ni baile ni comedia, cosa que no se había visto nunca, siendo administrador del Coliseo don Juan de San Vicente.

El día 15 de enero de 1784 en México, entró a la iglesia de la Santa Veracruz la imagen de Nuestra Señora de los Remedios.

El día 16 de enero de 1784, entró por la mañana a la Catedral Nuestra Señora de los Remedios, y en la noche a las ocho se sintió un fuerte terremoto.

El día 19 de enero de 1784 en México, por el correo semanario de tierra adentro supimos que en el real de minas de Guanajuato había habido un gran temblor y muchos ruidos subterráneos.

El día 22 de enero de 1784 en México, entró el correo de España, y en él le vino el grado de coronel del Ejército a don Pedro Garibay, y de coronel del Regimiento de Dragones de España a don Miguel Avilés; asimismo fue provisto el gobierno de Puebla.

El día 25 de enero de 1784 en México, por la tarde, salió de la Catedral en procesión Nuestra Señora de los Remedios para la iglesia de la Santa Veracruz. •

El día 29 de enero de 1784 en Méxicq, se publicó un bando con ataba- lillos para la entrada del nuevo virrey, don Matías de Gálvcz, que sería el 2 de febrero. Pero este mismo día salió nueva orden que se suspendía.

El día 30 de enero de 1784, a las cinco de la tarde, entró a México el secretario del Virreinato don Francisco Fernández de Córdoba, que venía del Perú, donde ftie secretario del visitador en aquel reino.

El día 31 de enero de 1784 en México, sacaron de la cárcel de la Acordada a 27 reos: 24 hombres y tres mujeres, dándoles 200 azotes.

Diario de sucesos de México • 123

El día 10 de este mes, a las once y media de la noche, murió el señor don Gregorio Mioño y fue enterrado el día 3 en la Catedral de México.

En 4 de febrero de 1784 en México, salió orden del virrey Matías de Gálvez para que no hubiera fiesta de toros ni carreras de caballos, sino hasta después de la Pascua de Resurrección.

El día 8 de febrero de 1784 en México, fue la entrada pública del señor virrey don Matías de Gálvez, y la hizo a caballo por la tarde. En el arco de la calle de Santo Domingo hubo su etiqueta entre el señor regente don Vicente de Herrera y el regidor decano que lo era don José Ángel de Aguirre, sobre cuál era el lugar para cada quien, y dijo el señor virrey que él no era el que podía definir este punto, que había que acudir a España para que Su Majestad dispusiera lo que debería hacerse de allí en adelante en estos casos. Y este mismo día en la noche, enfrente del Real Palacio, hubo un castillo que se disparó con gran aparato; pero viéndolo bien, no valió nada, para la enorme expectación en que mantuvo a todo México durante más de dos meses que duró en armarse.

El día 9 de febrero de 1784 en México, se publicó la paz, y fue con mucha solemnidad, pues salieron una compañía de granaderos de la Corona y otra de dragones del Regimiento de México.

El día 13 de febrero de 1784 en México, murió don Diego Fernández de la Madrid, oidor decano de la Real Audiencia, y al día siguiente fue enterrado en la Profesa.

El 14 de febrero de 1784 en México, amaneció un hombre muerto a palos en una accesoria de la calle de San Ildefonso. Los que lo mataron tuvieron la paciencia de ponerle un hábito de ahorcado con que lo amortajaron. Dicen que los asesinos fueron Joaquín Quintana y un tal Berrio, amujerados que aquí llaman putos o jotos. La justicia se llevó el cadáver de aquel individuo a la cárcel de Corte donde lo identificó su amo, quien lo hizo amortajar con el hábito de San Francisco y lo mandó enterrar a las seis de la tarde en la iglesia de Santo Domingo.

El día 16 de febrero de 1784 en México, murió el señor don Manuel Terán, caballero de la Orden de Santiago, y este día también murieron don

»

José Mateos, regidor de esta ciudad, y el señor secretario de Cámara don Juan de Zarazua.

En 17 de febrero de este mismo año, murió el mejor republicano que tenía esta ciudad, don Francisco Llanos de Vergara.

El día 21 de febrero de 1784 en México, pusieron en la cárcel de Corte un tablado y sacaron dos muchachas, una de doce y otra de trece años, españolas, con dos papelones en el pecho, por haberse fingido muerta la mayor, y la otra pedir para la mortaja. Las despacharon por dos años a las Recogidas, cosa que no merecía la pena por ser una muchachada.

El día 22 de febrero de 1784 en México, a causa de la peste de dolores de costado, sacaqon del convento de San Juan de la Penitencia a Nuestra Señora de la Soledad del Campo Florido, siendo la primera vez que sacaban esta imagen en procesión a la calle.

El 25 de febrero de 1784 en México, salió en procesión por la peste Nuestra Señora de Nativitas, y fue la primera vez que salió, en miércoles. Y este mismo día en el Real Palacio, comenzaron a montar guardia los alabarderos con botines y biricú.

El día 26 de febrero de 1784 en México, en el Santuario de Nuestra Señora de Guadalupe, comenzó la novena de la ciudad y las comunidades, y este mismo día se empezó a quitar la plaza de toros que estaba prevenida para la entrada del virrey, cosa que apreció mucho el público porque estaba apestada la ciudad de dolores de costado.

El día 29 de febrero de 1784 en México, salieron en procesión las imágenes de Nuestra Señora del Rosario, San Pedro y Santo Domingo, para que se aplacara la peste; pero no se ha visto procesión más lucida que ésta, ni con tanta cera tan especial y digna de memoria en Domingo de Cuaresma.

Nota

El día 25 de febrero de este año en el Santuario de Nuestra Señora de Guadalupe, en unos cimientos que estaban abriendo, se halló la osamenta completa de un elefante. A uno de sus colmillos lo hicieron pedazos los albañiles y a otro lo sacaron entero con tres varas y media de largo. Y todo, así el colmillo como los huesos los trajeron al Real Palacio para que los viera el virrey. Sobre esta osamenta dijeron los hombres más doctos que no podía ser menos que estar desde el diluvio, porque en este Reino de la Nueva España no se crían tales animales

Diario de sucesos de México • 125

ni se han visto, lo que da a entender su antigüedad, porque estaban los huesos y un colmillo hechos una harina. El caso es que esto file una cosa muy especial y digna de eterna memoria.

(arzo de 1784

El día Io de este mes en México, recibió el señor virrey don Matías de Gálvcz un cajoncito con media quijada y dos muelas de un gigante que le envió el alcalde mayor de Temascaltepec, cosa monstruosa, pues una de las muelas pesaba 30 onzas y la otra 28: esto pasmó a todos los que lo vieron.

El día 4 de marzo de 1784 en México, salieron de la cárcel de la Acordada 20 reos: 19 hombres y una mujer, y a todos les dieron 200 azotes.

El día 6 de marzo de 1784 en México, llegó el aviso de España y no trajo cosa especial.

El día 8 de marzo de 1784 en México, salieron de las tres cárceles las cuerdas de presidiarios y la tropa de trenzados para China. Y este mismo día, salió el señor virrey de la capital para el pueblo de Tacubaya, a mudar de temperamento en la casa del señor conde de Rábago, don Domingo de Rábago.

El día 12 de marzo de 1784 en México, entró el correo de España a las seis de la mañana, y no trajo más novedad que la real orden confirmatoria de la Real Academia de Bellas Artes, a la que el rey dotó con una pensión anual de 16 000 pesos sobre las cajas reales.

El día 13 de marzo de 1784 en México, sacaron de la cárcel de la Acordada dos hombres para ahorcarlos, a uno lo encubaron después, y luego le cortaron la mano donde mató a su mujer, y fue en sábado.

El día 26 de marzo de 1784 en México, por instrucciones del corregidor don Francisco Crespo, fue el alabardero don Juan de Torres a la Academia de Bellas Artes, para que lo pintara don Jerónimo Gil, del mismo modo que a otros soldados por cada regimiento de este reino, que serían enriados a Su Majestad el rey.

de 1784

El día 7 de este mes en México, se quitó el Cuartel del Comercio, en Miércoles Santo.

El día 12 de abril de 1784 en México, entró el correo semanario de La Habana con la noticia de que los bienes del señor Mayorga, virrey que había sido de esta Nueva España, estaban embargados en Cádiz de orden de Su Majestad, y que el día 28 de marzo había habido en la misma Habana un terremoto y una nevada, cosas jamás vistas en aquella isla.

El día 13 de abril de 1784 en México, se presentó el señor licenciado don Miguel José Baitazar Rodríguez de Gálvez, para capellán de la Compañía de Alabarderos despachado por el señor virrey; fríe el primer capellán que tuvo esta compañía.

El día 18 de abril de 1784 en México, salió en procesión general el Señor de Santa Teresa y todas las cofradías, comunidades, tribunales y el señor arzobispo don Alonso Núñez de Haro. Sólo faltó el señor virrey por hallarse enfermo en Tacubaya mudando temperamento. Lo que motivó esta procesión íue la epidemia de dolores de costado, pero otras veces que ha salido en procesión el Señor de Santa Teresa, ha sido en 1737,1749,1761 y 1779.

El día 29 de abril de 1784 en México, entró el correo de España con la noticia de una inundación en Sevilla, y que al coronel de la Corona don Juan Cambiazo, le vino el grado de brigadier.

El día 4 de este mes en México, en el Real Palacio, tomó posesión de capellán del Cuerpo de Alabarderos el señor don Miguel José Baitazar Rodríguez de Gálvez, capellán que era del Hospital de Jesús.

El día 17 de mayo de 1784, en el Sagrario de la Santa Iglesia Catedral, se puso el primer pan de oro en el colateral de San Luis Gonzaga. Y este día en la misma iglesia fue el primero de letanías que le tocaba ir al convento de San Agustín, pero por estar enlosándose las calles, no fue posible, por lo que el arzobispo dispuso que friera a Santa Teresa la Antigua. El día 18 fue la segunda letanía que le correspondía en turno al convento de San Francisco, pero por la misma razón del enlosado fue a la Enseñanza.

El día 20 de mayo de 1784, día de la Ascensión del Señor, no hubo sermón en la Santa Iglesia Catedral, que le tocaba a los agustinos, pues se Ies olvidó, y tuvieron su reprensión del arzobispo de México don Alonso Núñez de Haro.

Diario de sucesos de México • 127

El día 21 de mayo de 1784 en México, sacaron de la cárcel de Corte a un indio y su amasia para ahorcarlos y encubarlos, por haber matado entre los dos al marido de aquélla. Y este día, en la ciudad de Querétaro, un religioso carmelita descalzo llamado fray Andrés del Espíritu Santo, mató de una puñalada al regidor de dicha ciudad don Domingo Iglesias. Este padre era apóstata de la religión y tuvo sospechas de que el regidor lo había denunciado.

El día 30 de mayo de 1784 en México, entró el correo de España, y este mismo día fríe la misa de gracias, pero no hubo artillería ni asistencia de granaderos, pues así lo dispuso el regente don Vicente de Herrera, por estar enfermo el virrey en Tacubaya. También llegó noticia de haber entrado un convoy a Cádiz con felicidad el 1Q de marzo del presente año.

f uñió de 1784

El día 3 de este mes en México, se publicó con atabalillos el juicio de residencia del que friera virrey de esta Nueva España, don Martín de Mayorga. Y este día en el pueblo de Tacubaya, donde se halla actualmente el virrey don Matías de Gálvez, puso la cruz de la distinguida Orden de Carlos III al señor conde de Medina don José de Medina, que era sacerdote.

El día 5 de junio de 1784 en México, en el convento de Santa Isabel, ordenó el arzobispo don Alonso Núñez de Haro al señor conde de Jala, don Antonio Pedroso, y también a un religioso betlemita. Este mismo día se enterró a la madre de don Isidro Sarmiento y el día 6 a un ahijado mío, cuyos entierros frieron en la Santa Veracruz en sábado y domingo, respectivamente.

El día 6 de junio en México, a las dos y media de la mañana, se prendió fuego en una tocinería en el Puente de la Leña, y se quemó toda, de manera que ascendió la pérdida a once mil pesos sin la casa, la que era de los Santos Lugares.

El día 8 de junio de 1784 en México, murió el alcalde de Corte don Joaquín de la Plaza, y al día siguiente se enterró en el Sagrario de la Catedral.

El 10 de junio de 1784, día de Corpus, con motivo de estarse empedrando la calle de San Francisco, fríe la procesión por las calles de Santo Domingo, Donceles, esquina del Factor, esquina de Santa Clara y calle de Tacuba, donde volvió por el Empedradillo, cosa que nunca se había visto. Y este día, al comenzar la misa en la Catedral al cuarto cañonazo de la artillería, se prendió fuego a la caja de la pólvora, matando a un artillero, quebrando

los vidrios de la estufa del Santísimo, los de las ventanas del Tribunal del Consulado y los de la capilla real. Sala del Crimen y parte de las ventanas de la bóveda del Sagrario.

El día 14 de junio de 1784 en México, se restituyó al señor virrey don Matías de Gálvez de Tacubaya al Real Palacio, y el día 16 del mismo mandó la señora virreina que se echasen llaves en varias puertas para que no saliese ninguno de la familia, ni tampoco pudiera subir de abajo ninguno.

El día 23 de junio de 1784 en México, sacaron de la Acordada a un hombre para quemarlo por pecador de bestialidad con una burra, y también llevaron a la pobre burra a quemarla sin culpa.

El día 26 de junio de 1784 en México, a las seis y media de la mañana, murió el señor marqués de Rivas Cacho, que era cónsul y alguacil mayor de la Inquisición, y se enterró en el Carmen el día 27, pero por haber asistido el Tribunal del Santo Oficio no vino el del Consulado.

El día 29 de junio de 1784 en México, entró el correo de España y no trajo cosa especial. ,

El día 30 de junio de 1784 en México, en el Real Palacio se estrenó el Tribunal de Minería.

El día 10 de este mes en México, huyó de la cárcel de Corte don Bernardo de..., que estaba preso por orden del señor virrey.

El día 2 de julio de 1784 en México, en el Real Palacio se estrenó el Tribunal del Consulado.

El día 3 de julio de 1784 en México, sacaron de la cárcel de la Acordada 28 hombres y una mujer, a los que les dieron por las calles públicas 200 azotes por varios delitos.

El día 9 de julio de 1784 en México, en la cárcel de Corte, pusieron en un tablado a marido y mujer por encubridores de una hija coqueta que tenían.

El día 10 de julio de 1784 en México, en la cárcel de la Acordada, metieron en capilla a seis hombres para ajusticiarlos y eran siete, y el día 11, a las ocho de la mañana, mandó el señor virrey don Matías de Gálvez que sacaran a don Pedro Barón, que era gachupín que estaba también en capilla, el cual estuvo ocho horas, y lo metieron en una bartolina, cosa que no se había visto, y fue en sábado.

Diario de sucesos de México • 129

El día 12 de julio de 1784 en México, sacaron de la cárcel de la Acordada a seis hombres para ajusticiarlos y todos murieron a garrote.

El día 15 de julio de 1784 en México, fueron el señor virrey y la señora virreina a la Real Universidad, a un acto que les dedicaron como es costumbre, y no hubo réplicas más que una arenga muy corta que hizo el doctor don José Cisneros. Hubo una gran música y buen refresco, y todo fue en jueves por la tarde.

El día 21 de julio de 1784 en México, pasaron al convento de San Francisco a enterrar los huesos de don Alonso de Villaseca, patrono que había sido de la iglesia del Colegio de San Pedro y San Pablo de la Compañía de Jesús, habiendo estado enterrado 230 años, y fue porque se iba a demoler la iglesia.

El día 29 de julio de 1784 en México, en el Real Palacio, tomó posesión en el Tribunal de Cuentas de contador honorario don Pedro Allesdías, en jueves.

El día Io de este mes murió en México de parto la señora marquesa de San Miguel de Aguayo.

En 3 de agosto de 1784 en México, sacaron de la cárcel de la Acordada 31 hombres, dándoles 200 azotes por las calles, en martes.

El día 5 de agosto de 1784, entró a México el aviso de España y no trajo más novedad que haberle dado al hijo del señor fiscal don Ramón de Posada, los cordones de cadete del Regimiento de Zamora, y era un niño de tres años.

El día 11 de agosto de 1784 en México, murió el alabardero don Juan del Villar, hijo del alférez don Francisco del Villar, y el día 12 se le enterró en el convento de San Agustín.

El día 13 de agosto de 1784 en México, en el Regimiento de Alabarderos, se le dio a don Felipe Guardiola la plaza vacante por muerte de don Juan del Villar.

El día 21 de agosto de 1784, en el Sagrario de la Catedral de México, se terminó el colateral de San Luis Gonzaga a expensas de la familia Alcíbar, y hubo muchos fuegos y castillos, en sábado.

El día 25 de agosto de 1784, en el Real Palacio, tomó posesión de ciru-

jano de la Compañía de los Alabarderos don José Subeldie, y por haber sido el primero que tuvo este cuerpo militar hizo mucha novedad, en miércoles.

El día 27 de agosto de 1784 en México, entró el correo de España y trajo la noticia de que al señor don Bernardo de Gálvez lo habían hecho gobernador de Cuba, tomando posesión en La Habana el 4 de febrero de 1784.

El 31 de agosto de 1784 en México, murió don José Gorráes, capitán de Granaderos de Milicias, y se enterró en el convento de San Diego.

í ^-eptiembre de 1784

El día 3 de este mes, sacaron de la cárcel de fa Acordada 19 hombres, dándoles 200 azotes, en jueves.

El día 4 de septiembre de 1784, en el Santuario de Nuestra Señora de Guadalupe, fue recibido por el arzobispo de México don Alonso Núñez de Haro, el obispo de Valladolid don fray Antonio de San Miguel, monje jerónimo que venía de Comoyagua del Reino de Guatemala, a entrevistarse con el virrey don Matías de Gálvez. Y este mismo día, del convento de San Juan de Dios despacharon a fray Miguel de Gabiola a Puebla de los Ángeles, desterrado por orden del virrey. Dicho fraile era comisario de España de donde había venido un año y meses ha, pero no supimos los motivos.

El día 9 de septiembre de 1784 en México, sacaron de la cárcel de la Acordada ocho hombres para ajusticiarlos, cuatro frieron ahorcados y cuatro muertos a garrote, en jueves.

El día 16 de septiembre de 1784 en México, en el Real Palacio, se empezó a hacer gobierno con estampilla, por hallarse el señor virrey don Matías de Gálvez enfermo y no poder firmar. Mientras tanto hacía el gobierno el señor secretario don Francisco Fernández de Córdoba.

El día 17 de septiembre de 1784 en México, salió la cuerda de todas las cárceles, y no ha salido otra mayor pues reunieron a 500 hombres destinados a presidio.

El día 26 de septiembre de 1784, en el Sagrario de la Catedral de México, se estrenó el colateral de San Luis Gonzaga con mucha solemnidad, y dijo la misa el señor canónigo doctor don José Uribe, y predicó el doctor don José García Bravo, en domingo.

El día 29 de septiembre de 1784 trajeron a México de Tacubaya al señor

Diario de sucesos de México • 131

virrey, que estaba muy enfermo; entró al Real Palacio a las once del día en una litera cargada en hombros por 16 indios, y fue en miércoles.

El día 3 de este mes en México, sacramentaron al señor virrey don Matías de Gálvez; quien le ministró el Santísimo Sacramento fue el señor cura del Sagrario don Francisco Domínguez. A este acto asistieron el arzobispo de México don Alonso Núñez de Haro y el obispo de Michoacán, fray Antonio de San Miguel, y fue en domingo, fiesta del Santísimo Rosario.

El día 4 de octubre de 1784 en México, hizo su testamento el señor virrey ante el secretario don Mariano Cepeda.

El día 7 de octubre de 1784, en el Santuario de Nuestra Señora de Guadalupe, dijo su primera misa rezada el señor conde de Jala, don Antonio Pedroso, viudo con dos hijas, y fue en jueves.

El día 15 de octubre de 1784, entró a México el aviso de España y no trajo cosa especial.

El día 18 de octubre de 1784 en México, fue la misa de gracias por el aviso de España, pero no hubo disparo de artillería, ni los granaderos hicieron su descarga por estar enfermo el señor virrey.

El día 19 de octubre de 1784 en México, amaneció muerto en su cama el alférez de Alabarderos don Francisco del Villar, y al día siguiente fue enterrado en el convento de San Agustín, en la capilla de la Virgen de la Concepción.

El día 20 de octubre de 1784, comenzó a gobernar en la Nueva España la Real Audiencia por hallarse muy malo el señor virrey don Matías de Gálvez.

El día 25 de octubre de 1784 en México, en el Real Palacio, recibió la extremaunción el señor virrey a las seis de la mañana del capellán fray José Gómez.

El día 28 de octubre de 1784 en México, salieron a Veracruz para ser embarcados bajo partida de registro a España, los padres agonizantes de San Camilo, que estaban detenidos en el convento de San Francisco por pleito que tuvieron con su prelado.

oviembre de 1784

El día 3 de este mes, salió de México para Valladolid en la Provincia de M¡- choacán, el señor obispo de esa Diócesis don fray Antonio de San Miguel.

t

Muerte y entierro del señor virrey
don Matías de Gálvez

El día 3 de noviembre de 1784 en México, a las ocho y nueve minutos de la noche, murió el señor virrey don Matías de Gálvez, pero por ser al día siguiente santo de Su Majestad el rey Carlos III, no pudo presentarse su cadáver en público, sino hasta el día 5 a las cinco de la mañana en que se le hicieron los honores con tres cañonazos de artillería cada media hora, los que continuaron hasta el día 8 por la mañana, en que salió su entierro a la iglesia de San Fernando. Los padres de San Juan de Dios que lo asistieron durante su enfermedad fueron: en primer lugar, el prior fray José de Album, y fray Manuel Carmona, fray Pedro de Osorio, fray José Algarín y fray José de Salas.

El día 4 de noviembre de 1784 en México, por ser cumpleaños del rey, no sacaron al difunto virrey de la pieza en que murió; pero en la mañana hubo misa de gracias en la Catedral, en que se presentó de capitán general el regente don Vicente de Herrera, y en la tarde música en la Alameda y en la noche comedia en el Coliseo.

El día 8 de noviembre de 1784 en México, a las ocho y media de la mañana, salió de Palacio el cortejo fúnebre del virrey don Matías de Gálvez, de donde siguió por la calle de San Francisco y luego por la de Santa Isabel hasta el Puente de la Maríscala, a tomar calle derecha de la Santa Veracruz hasta el convento de San Fernando, que es donde fue el entierro. Acompañaron al cuerpo del difunto virrey desde el pie de la escalera del Real Palacio, seis coroneles con el señor capitán de Alabarderos y conde de Santiago don'Mariano de Velasco, y el señor caballerizo don Agustín Yáñez. Hubo en la estación cuatro posas, en las que se cantaron responsos y en cada una de ellas se expuso el cadáver del virrey, dando la cara al pueblo, como ponen a los señores sacerdotes. Dijo la misa de cuerpo presente en la iglesia de San Fernando el [[9]](#footnote-9)

señor don Leonardo Terraya, chantre de la Catedral de México. Y fueron de dolientes el señor fiscal don Ramón de Posada y Soto, el señor secretario don Francisco Fernández de Córdoba, el señor don Fernando José Mangino, el señor coronel don Juan Cambiazo, y los albaceas don José Chávez y don Francisco Cabezón. Cubrieron todo el recorrido cuatro regimientos, a saber: el de la Corona, el del Comercio, el de Milicias y la Compañía de Alabarderos que protegieron al féretro del virrey y a la Real Audiencia.

Nota

Los ochos que tuvo el señor virrey don Matías de Gálvez fueron los siguientes: el día 8 de marzo del año pasado de 83, salió el virrey de Guatemala y entró al pueblo de San Cristóbal Ecatepec el 28 de abril de ese año. El día 8 de febrero de 84 hizo su entrada pública en la ciudad de México. El día 8 de marzo de este mismo año, salió a Tacubaya a cambiar de temperamento por estar enfermo. A las 8 de la noche del día 3 de octubre de 84 lo sacramentaron en Palacio. El día 3 de noviembre de 84, a las 8 de la noche murió. El día 8 del mismo a las 8:30 de la mañana salió de Palacio para su entierro.

El día 11 de noviembre de 1784 en México, puso un cartelón el asentista o administrador del Coliseo don Juan de San Vicente, para anunciar que el día 12 se presentaría una comedia nueva intitulada: Saber premiarla inocencia y castigar la traición, por ser cumpleaños del príncipe de Asturias.

El día 13 de noviembre de 1784 en México, sacaron de la Acordada 23 hombres, dándoles 200 azotes por ladrones.

El día 19 de noviembre en Chapultepec, a las dos y diez minutos de la tarde, se incendió el molino de la pólvora ocasionando 77 muertos y muchos heridos.

El día 21 de noviembre de 1784 en México, entró el correo de España y en él le vino ascenso de teniente coronel de Artillería a don Diego García Panes, y a su hijo don Manuel, el grado de teniente.

El día 22 de noviembre de 1784 en México, fue ahorcado en la Plaza Mayor Rafael González, artillero, por haber matado a su amasia. Y aunque no hubo pregón ni clarín, asistieron los regimientos de Zamora, el de la Corona y el de Dragones de México.

El día 23 de noviembre de 1784 en México, en el Sagrario de la Catedral, se colocó el lienzo de Nuestra Señora de Guadalupe que está en el colateral junto al cancel de la puerta que mira al Arzobispado, y tiene su marco de plata.

El día 25 de noviembre de 1784 en México, sacaron de la cárcel de la Acordada nueve hombres para ajusticiarlos: seis ahorcados y tres dado garrote. Tres de estos fueron ejecutados y después quemados por sodomitas.

^rl) iciembre de 1784

El día 10 de este mes en México, a las dos y media de la tarde, murió el señor don Francisco Roma y Rossel, primer regente que tuvo la Audiencia de México y capitán general que tue por muerte del virrey Bucarcli. Enterróse- le al día siguiente en la capilla del Rosario de Santo Domingo, con asistencia del Cabildo eclesiástico, la Real Audiencia, la Nobilísima Ciudad, todas las corporaciones y la oficialidad de todos los regimientos militares, que salieron de Palacio hasta la casa mortuoria de la calle de Vergara. Llevaron el féretro a la sepultura cuatro señores ministros que fueron el fiscal de lo Civil don Ramón de Posada; el fiscal del Crimen don Lorenzo de Alba; el oidor don Joaquín Gadíano y el oidor don José de Urízar. Y acabado que fue el entierro todos volvimos en el mismo orden hacia la casa mortuoria, pero

I

sucedió una contingencia y fue, que en la medianía de la calle del Esclavo nos encontramos con el Santísimo SacranJento, por lo que el señor regente don Vicente de Herrera, capitán general por muerte del virrey don Matías de Gálvez, cedió su estufa al padre que llevaba a Su Divina Majestad, y se dirigió a pie hasta la calle del Reloj, donde despidió a la tropa de dragones que lo acompañaba y continuó a pie hasta su casa escoltado por la Compañía de AJabarderos.

El día 14 de diciembre de 1784 en México, entró un extraordinario de Acapulco con la noticia de haber llegado ahí felizmente del puerto de la Navidad, la nao de China.

El día 21 de diciembre de 1784 en México, presentaron al señor regente don Vicente de Herrera cuatro criaturas, todas varones que había parido una india en un solo paito, y aunque estos niños recibieron el bautismo, todos muñeron. ’

El día 22 de diciembre de 1784 en México, sacaron de la cárcel de Corte un hombre para ahorcarlo, y en la Puebla de los Ángeles, cinco individuos más Rieron ajusticiados por la Acordada.

El día 25 de diciembre de 1784 en México, entró el correo de España,

Diario de sucesos de México • 135

y al día siguiente hubo misa de gracias con la asistencia del señor regente don Vicente de Herrera y de la Real Audiencia gobernadora, en sábado.

ño de 1785. Enero

El día 1Q de este mes en México, salió de alcalde ordinario de Primer Voto don Pascual Covián, y de Segundo, don Joaquín Coya, en sábado.

El día 4 de enero de 1785, salió a Chapultepec el señor regente y capitán general don Vicente de Herrera, a una prueba de pólvora, y fue toda la oficialidad y toda la nobleza de México, en martes.

El día 7 de enero de 1785 en México, murió el señor oidor don Francisco Gómez Algan'n, y al día siguiente en la tarde fue su entierro en la Profesa.

El día 17 de enero de 1785 en México, salió la cuerda de presidiarios para Veracruz. Y este mismo día, entró el correo del reino y por él se supo que había muerto en Puebla el coronel de Dragones del Regimiento de España, don Miguel de Avilés.

El día 20 de enero de 1785 en México, en el Real Palacio, con la limosna que juntó en los corredores el lacayo Alejandro Pallares, se estrenó el colateral de la Virgen de la Escalera.

El día 29 de enero de 1785 en México, publicó un bando la Real Audiencia gobernadora para que se pongan faroles en toda la ciudad.

El día 30 de enero de 1785, entró en México el correo de España con la noticia de los siguientes nombramientos: de oidores al señor Beleña y al señor Mirafuentes; de alcaldes de Corte al señor Bataller y al señor Rey; de alguacil mayor del Santo Tribunal de la Inquisición al señor don Juan Casimiro de Osta. También trajo la noticia de haber muerto en Madrid el señor teniente general e inspector que había sido de este reino, don Pascual Cisneros.

El día 11 de este mes en México, sacaron de la cárcel de la Acordada trece hombres, dándoles 200 azotes por ladrones cuatreros, y los seis primeros fueron rematados por diez años a presidio y los otros siete por seis.

El día 12 de febrero de 1785 en México, sacaron de la Acordada tres [[10]](#footnote-10)

hombres para ajusticiarlos, dos fueron ahorcados y uno agarrotado.

El día 17 de febrero de 1785 en México, salió.en carros y con atabali- llos el dinero de limosna reunido para la Redención de Cautivos, y salió del convento de la Merced.

El día 19 de febrero de 1785 en México, llegó noticia de La Habana, que el día 4 de este mes tomó posesión del gobierno de Cuba el señor don Bernardo de Gálvez.

El día 25 de febrero de 1785 en México, entró el correo de España con la noticia de haberle llegado el deanato al señor don Leonardo Terraya, y la canonjía penitenciaria al señor don José de Uribe.

El día 28 de febrero de 1785 en México, se estrenó el cuartel de caballería del Regimiento de Dragones que está en el Puente de los Gallos.

Carzo de J 785

El día 1Q de este mes en México, en la Santa Iglesia Catedral, celebró la misa de gracias el señor arzobispo don Alonso Núñez de Haro, por el parto de la princesa infanta, y hubo luminarias y colgaduras en las calles de la ciudad.

El día 3 de marzo de 1785 en México, en la mañana, tomaron posesión de sus cargos el señor deán de la Catedral, don Leonardo José Terraya, y el señor canónigo don José de Uribe, y en el real acuerdo los oidores don Simón de Mirafuentes y don Eusebio Beleña; de alcaldes de Corte los señores don Miguel Bataller y don Félix del Rey, y de fiscal el señor don Lorenzo de Alba.

El día 4 de marzo de 1785 en México, en la Santa Iglesia Catedral, dieron las vísperas y oración fúnebre a la memoria del difunto virrey don Matías de Gálvez. Predicó el señor doctor don José García Bravo y asistieron la Universidad y todos los tribunales y corporaciones civiles, militares y religiosas. Al día siguiente por la mañana celebró la misa el señor arzobispo don Alonso Núñez de Haro, y predicó el sermón el señor canónigo doctor don José de Uribe.

El día 8 de marzo de 1785 en México, en el Hospital de la Tercera Orden de San Francisco, murió a las diez y media de la noche el cabo de Escuadra de Alabarderos don Lorenzo Moneada, que había servido como 47 años y tenía de edad 71 años. Fue enterrado al día siguiente en la capilla de dicho hospital.

Diario de sucesos de México • 137

Gastos superfluos en México

A LO LARGO DE TODO EL AÑO

En enero por San Antonio Abad, los cascarones. En febrero por carnestolendas, huevos de quebrar y anices. En marzo la Semana Santa, matracas y monumentos. El Sábado de Gloria los judas. En mayo por el Corpus, las tarasquitas. En junio, día de San Juan y San Pedro, los caballitos, espadas, gabanes y laureles. En agosto, muñequitos del Pendón. En noviembre, las tumbas, ofrendas y muertitos. En diciembre las benditas y nacimientos. Siguen varios juegos de los muchachos: papalotes, nueces, clavitos, pelotas, picado, pítima, rayuela, trompo, cohetitos, pelotero, pirinola. Todo esto es gasto superfluo que hacen los padres de familia sin necesidad y con decadencia de sus caudales.

El día 29 de marzo de 1785, salió de México para España la viuda del señor Romá y Rosell, primer regente de la Nueva España, y fue en compañía de su hijo don Francisco.

OÍbril de 1785

El día 2 de este mes se repicó por aviso de España, y le vino al señor don Juan de Mier y Villar la canonjía de la Catedral de México, de la que era media ración.

El día 5 de abril de 1785 en México, en la Santa Iglesia Catedral, bendijo el señor arzobispo don Alonso Núñez de Haro las banderas del Regimiento de Zamora, y siendo este día cumpleaños del segundo señor regente don Vicente de Herrera, no recibió felicitaciones de nadie, ni le pusieron papel para festejarlo, ni hubo comedia en el Coliseo, cosa que se hizo notable, y fue en martes.

El día 8 de abril de 1785, salió de Palacio para Tacubaya la señora doña Ana de Sayas, virreina viuda del señor don Matías de Gálvez, la cual no había salido a la calle desde el día 29 de septiembre de 1784, en que trajeron a su esposo muy malo precisamente de Tacubaya.

El día 9 de abril de 1785 en México, empezó a entrar a Palacio la guardia sin bandera de la Guarnición de Zamora, con alférez y sargento y 30 hombres, porque ya no estaba ahí la señora virreina viuda. [[11]](#footnote-11)

El día 10 de abril de 1785 en México, murió don José de Velasco y Flores, hermano del señor conde de Santiago y capitán de Alabarderos, y se enterró el día 12 en la sacristía del convento de San Francisco, y fue su muerte en domingo y su entierro en martes.

El día 12 de abril de 1785 en México, sacaron de la cárcel de la Acordada a 38 hombres, dándoles 200 azotes en las calles públicas por varios delitos, y después fueron a presidio. Y este día en el convento de San Fernando, por orden del señor fiscal de la Real Flacienda don Ramón de Posada, se trasladó el cuerpo del difunto virrey don Matías de Gálvez a un lado del evangelio del templo de dicho convento.

El día 17 de abril de 1785 en México, en el convento de Santa Clara, se enterró a doña María Josefa Balcázar Altamirano y Velasco, hija del señor don Domingo Balcázar, que había sido oidor decano de la Real Audiencia y camarista de Su Majestad. Doña María Josefa murió en Guanajuato y de ahí trajeron su cuerpo.

El día 25 de abril de 1785 en México, a las cuatro de la mañana, entró el correo de España con la noticia de venir de virrey el señor don Bernardo de Gálvez, hijo del difunto virrey del mismo apellido. Dicho señor don Bernardo, hacía 15 años que había estado en México de capote y de muy escasa fortuna, y el señor marqués de Croix lo hizo alférez de la Corona; de esta ciudad pasó a La Habana hasta llegar a ser teniente general y conde de Gálvez.

El día 30 de abril de 1785 en México, en la calle de Capuchinas, casó el señor arzobispo.don Alonso Núñez de Haro a una hija de don Antonio Pe- droso, conde de Jala, con el señor conde de Regla, y a esta boda asistió toda la nobleza y el regente y capitán general interino don Vicente de Herrera.

El día 8 de este mes en Tacubaya, se incendió uno de los molinos de la pólvora, y se dice que dos soldados criollos del Regimiento de Zamora fueron los que le prendieron fuego.

El día 11 de mayo de 1785 en México, se publicó un bando con atabalillos pata traer a Nuestra Señora de los Remedios por la escasez de aguas, en miércoles.

El día 13 de mayo de 1785 en México, en la puerta de la cárcel de Corte, se expuso en un tabladito a dos mujeres, una a la vergüenza y otra

Diario de sucesos de México • 139

emplumada por alcahueta de su hija. El mismo día sacaron de dicha cárcel a tres hombres, dándoles 200 azotes por ladrones, en viernes.

El día 14 de mayo de 1785 en México, salió en procesión de la Santa Veracruz rumbo a la Catedral Nuestra Señora de los Remedios, y el día 15 del mismo se comenzó la novena para implorar de Dios con esta Señora nos mande el socorro de las aguas porque los campos están perdidos.

El día 22 de mayo de 1785 en México, en la iglesia de Santo Domingo, se hizo un auto de fe con 18 reos, 14 hombres y 4 mujeres, por varios delitos, entre ellos un hereje sectario gallego llamado Francisco Laje (alias Hurtado), el hombre más malo que se ha visto en estos tiempos, pues llegó hasta el grado de ateísmo. Duró el auto desde las seis y media de la mañana hasta las cinco de la tarde que se acabó la misa. Y este día en que se estrenó de alguacil mayor del Santo Oficio el señor coronel don Juan Casimiro de Osta, caballero del Hábito de Santiago, se levantó un huracán de aire y polvo que no se veían las casas.

El día 23 de mayo de 1785 en México, día en que se acabó la novena de Nuestra Señora de los Remedios, fue llevada su Divina Majestad a la iglesia de la Santa Veracruz, y aunque en toda la novena no cayó una gota de agua, este día se levantó en la noche una tempestad de truenos y relámpagos muy grande, y cayó un buen aguacero, por lo que al día siguiente fue llevada la Santísima Virgen a su santuario.

El día 26 de mayo de 1785, día de Corpus, se puso la enramada en la calle de San Francisco, no con morillos como se hacía antes, sino con mecates desde las azoteas. La enramada quedó en medio de la calle y fue el primer año que se hizo de esta manera.

El día 29 de mayo de 1785, a las cinco de la mañana, entró en México un extraordinario con la noticia de que el 25 de este mes había desembarcado en Veracruz el nuevo virrey señor don Bernardo de Gálvez, y que el día 30 saldría de dicha ciudad para esta Corte.

unió de 1785

El día 3 de este mes en México, entró el correo de España y no trajo más novedad que la muerte del padre general de la Orden de San Agustín.

El día 7 de junio de 1785 en México, fue la misa de gracias por la llegada del Correo de España, y es la última a que asistió como capitán general el señor regente don Vicente de Herrera, por hallarse muy cerca de esta ciudad el señor virrey conde de Gálvez, en martes.

El día 9 de junio de 1785 en México, sucedió que un soldado granadero del Regimiento de Zamora llamado Francisco Monclus, estando encapillado en la cárcel de la Acordada para ser ejecutado, se volvió loco.

El día 15 de junio de 1785 en México, retiró el señor regente don Vicente de Herrera la Guardia de Alabarderos de su casa, que tenía por capitán general desde el día 8 de febrero de este año.

El día 16 de junio de 1785, en el pueblo de San Cristóbal, recibió el bastón de mando del señor regente el virrey don Bernardo de Gálvez.

Entrada a i .a capital

DEL VIRREY CONDE DE GÁLVEZ

El día 17 de junio de 1785, entró a México el señor virrey conde de Gálvez, y tomó posesión en el real acuerdo en presencia de los señores oidores y alcaldes de Corte, y del señor regente don Vicente de Herrera, en viernes.

El día 18 de junio de 1785 en México, salió la cuerda de presidiarios, y dieron como 250 hombres, en sábado.

Los días 21 y 22 de junio de 1785, se hicieron en esta capital dos comedias de balde en celebridad de la llegada del señor conde de Gálvez, que frieron El desdén con el desdén y El enemigo de las mujeres, por otro título El marqués de Forlipón, en martes y miércoles, y file siendo el asentista del Coliseo don Juan de San Vicente.

El día 25 de junio de 1785, entró a México el aviso de España y no trajo cosa particular.

El día 26 de junio de 1785 en México, a las dos y media de la mañana, hubo un temblor de tierra muy razonable, y en la mañana fue la misa de gracias a la que asistió el virrey conde de Gálvez, en domingo.

El día 29 de junio de 1785 en México, asistió a la Catedral el señor virrey con la virreina, por ser día de tabla, festividad de San Pedro, en miércoles. [[12]](#footnote-12)

jfulio de 1785

El día 3 de este mes en México, en la parroquia de Santa María la Redonda, salió la procesión de Corpus, y fue la primera vez que salió de esta parroquia, siendo cura el señor doctor don Joaquín Gallardo.

El día 7 de julio de 1785 en México, sacaron de la Acordada 20 hombres dándoles 200 azotes, y a una mujer a la vergüenza. Y este mismo día en la iglesia de San Agustín, se cruzó de caballero del Hábito de Santiago el señor corregidor don Francisco Crespo, en jueves.

El día 8 de julio de 1785 en México, sacaron de la Acordada para darles garrote a tres hombres por ladrones de caminos, en viernes.

El día 11 de julio de 1785 en México, entró el correo de España, y en éste le vino licencia para casarse al señor alcalde de Corte don Cosme de Mier y Trespalacios con la hija del señor conde de Santiago.

El día 19 de julio de 1785 en México, en el Real Palacio, el teniente coronel don Pedro Salcedo regaló un enano al virrey, mismo que medía de altura una vara, tenía 19 años de edad y sabía ejecutar perfectamente todos los toques de ordenanza.

El día 3 de este mes sacaron de la Acordada 26 hombres, dándoles 200 azotes por las calles acostumbradas, por varios delitos.

El día 6 de agosto de 1785, sacaron de la cárcel de la Acordada a un poblano llamado José Campuzano, y lo llevaron al Santuario de Nuestra Señora de Guadalupe, donde le dieron 200 azotes por haber intentado robar una chapa de plata de su crujía. Traído a México, al pasar por el Real Palacio se asomaron a verlo el señor virrey y su esposa, lo que causó mucha novedad, porque desde la aparición de la Virgen jamás se había llevado a un reo a castigar a su santuario.

El día 7 de agosto de 85 en México, entró el Correo de España, y en él vino orden de que se gratificase con seis mil pesos de ayuda de costa al señor regente don Vicente de Herrera, por el tiempo que sirvió interinamente

como capitán general del Virreinato. Y en este mismo correo le vino la chan- tría al canónigo de la Catedral don Félix Venancio Malo, que antes había sido oidor de la Real Audiencia.

En estos días le pusieron al señor virrey el siguiente pasquín:

Yo te conocí pepita

Antes que fueras melón,

Gobierna bien el bastón

- cuida a la francesita.

Del mismo modo, debido al genio un poco áspero del señor inspector don José Espeleta, y lo propio con su mujer, que vinieron con el virrey conde de Gálvez, les hicieron este otro pasquín:

i

El virrey muy bueno, *

La virreina mejor,

El inspector el diablo,

- su mujer peor.

El día 11 de agosto de 85 en México, en la parroquia de Nuestra Señora de la Soledad, se pusieron tres campanas: una grande, otra más mediana y otra chiquita. La primera se llamaba Nuestra Señora de la Asunción, la segunda San Cristóbal, y la tercera de la Archicofradía, y todo lúe en jueves y el cura de la parroquia el señor don Gregorio de Cando.

El día 12 de agosto de 1785 en México, salió la cuerda de presidiarios de todas las cárceles para sus destinos.

El día 18 de agosto de 1785, salieron el señor virrey y su esposa al Santuario de Nuestra Señora de Guadalupes recibir a don Manuel de Flon y a su señora esposa doña Mariana Maxent, hermana de la virreina. Flon era teniente coronel del Regimiento de Navarra y venía de gobernador de Nuevo México. Ambos consortes llegaron a Palacio en el coche del señor virrey.

El día 19 de agosto de 1785, se estrenó en el Real Palacio el magnífico salón de besamanos con una colgadura de damasco carmesí con galón, flecos y borlas de oro, un dosel de terciopelo también carmesí y el retrato del rey muy especial; diez docenas de sillas de madera fina, 24 forradas de terciopelo con galón de oro y las demás de damasco, todas de carmesí, 14 espejos muy

Diario de sucesos de México • 143

especiales, 16 pantallas iguales a los espejos, tres candiles de cristal y una alfombra muy particular; además, un cielo raso y las cuatro ventanas del salón con vidrieras de vara en cuadro, todo con gran primor como nunca se había visto, para celebrar los días del señor virrey. Y este mismo día tomó posesión de su canonjía el señor chantre de la Catedral, don Félix Venancio Malo.

El día 25 de agosto de 1785, día de la princesa de Asturias, encapillaron en la cárcel de la Acordada a cinco reos, cosa bien memorable por ser día de las Mercedes. Dichos reos fueron ajusticiados el día 27: dos ahorcados y los otros tres sufrieron pena de garrote.

El día 29 de agosto de 1785, entró el Santo Jubileo Circular en la Catedral por cuatro días, de forma que se descubre a su Divina Majestad desde las siete de la mañana hasta las cinco de la tarde, hasta completar 40 horas, que es la concesión.

El día 30 de agosto de 1785, estrenó el virrey conde de Gálvez el uniforme de inspector general: era de paño envinado con solapa y vuelta amarilla y ojales de oro; fue en martes, día de Santa Rosa María.

El día 5 de este mes en México, se repicó en la Catedral por la llegada del Correo de España, y en éste le vino al señor inspector don José Espeleta, el nombramiento de gobernador de Cuba.

El día 6 de septiembre de 1785 en México, fue la misa de gracias por la salud del rey y no asistió el señor virrey. Este mismo día, después de la misa, tomó posesión de la fiscalía del Crimen don José Pablo Valiente y Bravo, con la asistencia del virrey y el regente don Vicente de Herrera, en martes.

El día 8 de septiembre de 1785 en México, en el Real Palacio, tomó posesión de alabardero don Félix Arteaga, en jueves.

El día 10 de septiembre de 1785, en el Real Palacio, el capitán don Mariano de Velasco y el alférez don Juan Alberto Badamés, presentaron memorial solicitando al señor virrey aumento de sueldo para el Cuerpo de los Alabarderos.

El día 12 de septiembre de 1785, murió doña María Somosa por otro título, La Calderona, muy querida en esta ciudad, y fue enterrada el día 13 en el convento de San Francisco.

El día 19 de septiembre de 1785, pasó el señor virrey con toda su familia a visitar la Casa de Moneda, y vieron primores; estuvieron desde las nueve de la mañana hasta las dos y media de la tarde, atendidos por el superintendente de dicha casa, don Fernando Mangino, y fite en lunes.

El día 25 de septiembre de 1785, en el Hornillo, fue el primer ensayo de toros y asistió el virrey con su esposa.

El día 26 de septiembre de 1785, salió de México para su destino el señor Manuel de Flon en compañía de su esposa doña Mariana Maxcnt, hermana de la virreina.

El día 29 de septiembre de 1785, en el Real Palacio, se estrenó la antesala que estaba vestida de papel de varios colores en celebridad del niño don Miguel de Gálvez, hijo del virrey; hubo besamanos, en la tarde toros de ensayo y en la noche comedia, cuyo titulo fue El inocente culpado; a nada asistió el virrey por estar algo indispuesto, pero sí la señora virreina, y fue en jueves.

(J0ctubre de 1785

El día ls de este mes, en el Real Palacio, hubo un acuerdo extraordinario de oidores, a que asistió por primera vez el señor virrey don Bernardo de Gálvez desde que tomó posesión.

El 6 de octubre de 1785, en el Real Palacio, murió a las siete y media de la noche el padre agustino fray José Gómez de Tagle, capellán qué había sido de los señores virreyes Matías y Bernardo de Gálvez. Su entierro se llevó a cabo el día 8 en el convento de San Agustín, al que asistió toda la familia del virrey.

Pasquín que le pusieron al señor virrey conde de Gálvez:

En todas partes te veo

Menos en el jubileo.

El día 11 de octubre de 1785 en México, hubo unos fuegos artificiales en celebridad de las vísperas de Nuestra Señora del Pilar de Zaragoza, y ios costeó el Regimiento de la Corona por ser su patrona, en martes.

El día 12 de octubre de 1785, en la Catedral, bendijo el señor arzobispo don Alonso Núñe» de Haro cuatro banderas del Regimiento de la Corona,

Diario de sucesos de México • 145

con la asistencia del virrey y su esposa. Y en esta bendición no se pusieron los sombreros los oficiales en el evangelio, pero sí sacaron las espadas; mas en las demás bendiciones sí se pusieron los sombreros como en las banderas de los regimientos de Granada y Zamora. Este mismo día, a los cuatro años de edad, don Miguel, hijo del señor virrey, se estrenó de soldado raso en el Regimiento de Granaderos. Y luego que dio el virrey un refresco general a toda la oficialidad en el salón de besamanos, se vio una cosa bien memorable y flie, que en la azotea de Palacio se hizo una enramada a la que asistió una multitud de gente de rodas clases. A la noche fueron los señores virreyes a la comedia, que fue Apeles y Campcispe.

Nota

Para la función antes dicha en Catedral, no asistió don Bernardo de Gálvez como virrey, sino de capitán general con uniforme del Regimiento de la Corona; salió de Palacio a pie con toda la oficialidad y entró a la Catedral por la puerta del Empedradillo.

Pasquín que pusieron en Madrid al rey nuestro señor don Carlos III, que Dios guarde:

Tres Carlos admira España

En dos siglos poco más,

- en lo poco más verás

Lo que la esperanza engaña.

La espada fue la espadaña

- ésta se volvió de acero,

Pues lo que en Carlos 10

Fue admiración para el mundo,

Se hundió en Carlos 2a

- quebró en Carlos 3a.

El día 18 de octubre de 1785, entró el Correo de España, y en éste vino la novedad de haberse mudado los colores de las banderas de los navios. El color es amarillo con listas encarnadas, y en los navios del rey las armas reales. También vino por este correo al señor fiscal don Ramón Posada, la cruz de la

distinguida Orden de Carlos III. Al día siguiente fiic la misa de gracias y no asistió el señor virrey.

El 20 de octubre de 1785, fue el ensayo general de toros en el Volador, que duró todo el día, y no asistió el señor virrey sino sólo en la tarde, en que se echó un globo muy grande en dicha plaza, en jueves.

El día 22 do octubre de 1785, sacaron de la cárcel de la Acordada ocho hombres para ajusticiarlos: cuatro en la horca y cuatro de garrote, siendo capitán de dicha cárcel don Manuel de Santa María, en sábado.

Nota curiosa

El año de 1696 en México, se comenzó a hacer el actual Real Palacio, siendo virrey el señor conde de Galve. El año de 1710, se acabó la fechada siendo virrey el señor duque de Alburquerque, y en 1785 se reedificó, pintó y adornó, siendo virrey el señor conde de Gálvez.

El día 30 de octubre de 1785, salió el señor virrey con la oficialidad a pasear por los portales; el día 31 del mismo en la noche, volvió con la señora virreina, y el día ls de noviembre salió él solo al mismo paseo, cosa que en este reino nunca se había visto. La noche de este día fue con la señora virreina, con los niños y toda la femilia, acompañado úhicamente de cuatro alabarderos.

El día 31 de octubre de 1785, salió de México el señor brigadier don José Espeleta para el puerto de Veracruz, y de allí a La Habana a donde iba de gobernador.

El día 3 de este mes, en el convento de San Fernando, hizo el señor conde de Gálvez por el aniversario de su difunto padre, sus honras fúnebres, a la que asistió la Compañía de Alabarderos con su capitán y alférez, y se pusieron en la tumba cuatro alabarderos, dos más en el sitial del virrey y otros dos en el de la virreina; concurrió la mayor parte de la nobleza de México, y fue en jueves. Este mismo día sacaron de la Acordada 39 hombres, ciándoles 200 azotes por las calles acostumbradas, y después fueron a presidio.

El día 4 de noviembre de 1785, después de la misa de gracias y el besamanos, inauguró el virrey la Academia de Bellas Artes. Hubo premios para

Diario de sucesos de México • 147

33 personas con un monto de 400 pesos y por la tarde un gran refresco y comedia, a más de un globo en el Patio de los Inválidos, que es el mejor de todos los que hasta ahora se han echado en México.

Nota

Este año en México, con tantos globos que se han echado sacaron los versos siguientes:

Sombreros a la tarasca Es echar al viento globos,

Porque no advierten los bobos El dinero que les masca;

- ello se vuelve hojarasca Hecha de papel y cola,
- no una persona sola,

Sino muchas a porfía,

Gritan de noche y de día Diciendo, ahí va la bola.

El día 7 de noviembre de 1785 en México, se publicó un bando para que se reformasen las muías de los coches, esto es, que el que tenía 6 como el virrey y el arzobispo, saliera con dos, cosa que ha dado mucho golpe, y fue por la escasez de cebada y maíz que había.

El día 8 de noviembre de 1785, en la Santa Iglesia Catedral de México, se hicieron las honras de los militares a las que asistió el virrey y su señora esposa acompañados por todo el Cuerpo de Alabarderos con su piti uniforme. Predicó el padre fray Pedro Callejo, en martes.

El día 9 de noviembre de 1785, en la Plaza del Volador que estaba armada para los toros, pasó revista el señor virrey como inspector general al Regimiento de la Corona y a su hijo el niño Miguel, como soldado granadero, en miércoles.

El día 10 de noviembre de 1785 en México, en la Real Universidad, fue reelecto como rector el señor doctor don Joaquín Gallardo, y este día entró a esta capital el comandante de Fragata don Rafael Carrasco.

El día 12 de noviembre de 1785 en México, día de San Diego y del

príncipe de Asturias, hubo misa de gracias en la Catedral y besamanos en palacio; por la tarde paseo y refresco magnífico y a la noche siguió el sarao que duró hasta las tres de la mañana con la concurrencia de la mayor parte de la nobleza y toda la oficialidad, pero no asistió el virrey a la comedia que fue Labran Cenobia. Y este día en el convento de Santo Domingo se celebraron las vísperas de la función de Nuestra Señora de Covadonga, que festejan los asturianos; pero este año lo celebraron con mayor solemnidad porque fueron ocho alabarderos por la tarde, entre ellos yo, José Gómez, José Moreno, el cabo Pedro Palacios, José y Félix Arteaga, Agustín Zapata, Felipe Guardiola y Juan Gutiérrez. Al siguiente día 13 fue la función grande en que hubo procesión, misa y sermón que lo dio el padre fray Antonio Blanco del convento de San Francisco, y asistieron 14 alabarderos y una compañía de granaderos del Regimiento de la Corona.

El día 14 de noviembre de 1785 en México, fue la primera corrida de toros en la Plaza del Volador, y en la mañaqa y tarde el señor virrey con su esposa, en su birloche, recorrieron el redondel de la plaza. Ambos repitieron en la noche, pero esta vez a pie, acompañados por los alabarderos con su piti uniforme, que otras veces lo habían hecho de gala.

El 15 de noviembre de 1785, fue la segunda corrida de toros, y este día el señor virrey en la mañana y la tarde volvió a recorrer la plaza, en la noche con la virreina y después él solo de capote. Por la tarde toreó una mujer ahijada del virrey, y tuvo de galas ciento seis pesos. El día 16 no hubo toros porque llovió todo el día.

Nota

De estos toros nos dieron a los alabarderos la lumbrera número 75, y por ella el día 14 recibimos 100 pesos, más cinco reales por el alquiler en la mañana. Los diputados o comisionados de la plaza fueron el regidor don Miguel de Lugo y don Ignacio Peza.

El día 21 de noviembre de 1785 en México, fue la tercera corrida de toros, y este día por la mañana y tarde volvieron el virrey y su esposa a recorrer la plaza en su birloche. Estuvieron los toros muy malos y en la tarde salieron dos hombres en unos zancos a torear, y fue en lunes.

El día 22 de noviembre de 1785, fue la cuarta corrida de toros, y asistieron por la mañana y tarde los señores virreyes; los toros no estuvieron tan malos.

Diario de sucesos de México • 149

El día 23 fiic la quinta corrida de toros; en la tarde salieron cuatro mujeres a torear y no estuvieron malos los toros. En la noche, a las ocho, se prendió fuego al palo o mongibelo que estaba en medio de la plaza en que se detenía la vela, y se quemó todo. El virrey bajó a dar las disposiciones que eran convenientes, pero antes los soldados les tiraron a los pobres todas las mesas en que estaban vendiendo merienda, y perdieron todo.

El día 24 de este mes, fue la sexta corrida de toros, y en la tarde torearon seis mujeres y no estuvieron muy buenos los toros.

El día 27 de noviembre de 1785, file la publicación de las bulas y asistió el señor virrey a Catedral. Predicó el padre fray José Mariano Rico, guardián del convento de San Diego.

El 28 de este mes, fue la séptima corrida de toros y no bajó el señor virrey en la mañana, por estar un poco indispuesto; pero la virreina sí asistió. En la tarde vino el virrey y tuvimos un globo en la plaza, de los mejores que se han echado en esta ciudad. Los toros estuvieron buenos y malos, porque hubo de todo. En la noche hubo un castillo de fuego de colores, de lo mejor que se ha visto, y después en un tablado que se previno para la música, hubo un baile típico y la señora virreina condesa fue la primera que lo inició, y luego siguieron las demás señoras, cosa que con el tiempo no lo creerá nadie, pero así fue, estando presente el señor virrey.

El día 29 de noviembre de 1785 en México, salió la cuerda de presidiarios de todas las cárceles, y frieron como 400 hombres.

(diciembre de 1785

El día 1Q de este mes, file la última corrida de toros en que hubo un globo muy bueno, y también en la noche fuegos extraordinarios, mas los toros no valieron nada. En la noche, bajaron el señor virrey y su esposa a la plaza y hubo baile.

El día 2 de diciembre de 1785 en México, murió don Matías Peñón de Estrada, y se enterró el día 3 en el convento de la Merced. Este caballero había sido alabardero durante 32 años cumplidos, y a vísperas, poco más de dos meses, había renunciado a su plaza; sólo yo, José Gómez, asistí a su entierro, y fue su muerte en viernes y su entierro en sábado.

El día 7 de este mes en el pueblo de Cuautidán, a cinco leguas de México, hubo un levantamiento de los naturales contra el señor cura, porque los

indios tenían una Virgen de la Concepción que era la jurada del pueblo, y el señor cura se las ferió, por lo que se originó el tumulto. El día 8 a la una del día, salió una compañía de dragones del Regimiento de México para apaciguarlos. (Vid. Nota del día 22 de este mes).

El día 8 de diciembre de 1785 en México, se celebró con baile en el Real Palacio el cumpleaños de la excelentísima señora doña Concepción Valenzuela, mujer del señor don José de Gálvez, primer ministro de Indias.

El día 9 de diciembre de 1785 en México, a las ocho y media de la noche, entró el Correo de España y vino al señor secretario del Virreinato don Francisco Fernández de Córdoba, la gracia de la cruz de la distinguida Orden de Carlos III; al señor alcalde de Corte don Cósme Mier, el nombramiento de oidor, y lo mismo al señor don Juan Francisco de Anda. También vino certificada la muerte del infante don Luis.

El día 17 de diciembre de 1785 en México, salió el conde de Gálvez con la señora virreina al baratillo, a ver los altares que se habían puesto de Nuestra Señora de Guadalupe, y fue sólo con dos alabarderos, y en la noche sin más guardia.

El día 19 de diciembre de 1785 en México, empezaron las tres corridas de toros de cuenta del señor virrey, y no asistió la Real Audiencia y estuvieron los toros muy buenos.

El día 20 fue la segunda corrida de toros, en que salieron cuatro tapados de caballos muy galanes, y el virrey les echó cuatro papeles en que iban cuatro bandas encarnadas con flecos de plata, y en las suertes que hicieron les echó dicho señor papeles con medias, con mascadas y pañitos, lo que no se había visto, y estuvo la tarde muy divertida.

El día 21 de diciembre de 1785, día de Santo Tomás, hubo la tercera corrida de toros por la tarde, no más por ser día de fiesta, y entraron los tapados y les echó el virrey papeles con un dobloncito en flores cartulinas, y esta tarde hubo palo encebado que tenía cuarenta pesos, veinte en pesos, veinte en de a cuartos, un capote azul con galón de oro, un sombrero de castor y una banda y mascadas; en fin, la tarde estuvo muy divertida.

El día 22 fiie la cuarta corrida de toros, y entraron los tapados y se siguió el mismo régimen: hubo un monteparnaso o cucaña, pero no se había visto en esta ciudad otra mejor de ropa, aves, animales y hasta tres bandejas de plata. El virrey estuvo tan gustoso que tiró su pañuelo, el de la señora virreina y los de sus hijos, que por poco tira el uniforme, con que se hizo la tarde muy alegre.

Diario de sucesos de México • 151

Nota

Este día 22, hizo el señor virrey una de las acciones más grandes que se hayan hecho en este reino y fue, que habiéndole traído 16 reos con grillete por haberse alborotado en Cuautitlán, los perdonó y rompió las causas, y fue en jueves. (Vid. Día 7 de este mes).

El día 23 de diciembre de 1785 en México, fue día de justicia, pues sacaron de la Acordada entre otros, a 24 hombres, dándoles 200 azotes por sus delitos. A una mujer por ladrona, le colgaron un plato y unos cubiertos de plata en el pescuezo; a otro individuo de la cárcel de Corte, le dieron 200 azotes, y a otros dos 50 azotes en la picota. Y este día en la Real Audiencia, el señor alcalde de Corte don Cosme de Mier y Trespalacios, ganó el pleito del marquesado de Salvatierra a su suegro. Igualmente este día, se fue el señor virrey a Chapultepec a poner la primera piedra del palacio nuevo que se va a hacer, y puso en los cimientos varias monedas de oro y plata.

El día 28, a la una de la noche, entró el correo de Acapulco con la noticia de que había llegado a aquel puerto la nao de China, o sea el navio San José de Gracia.

El día 31 de diciembre de 1785 en México, hubo en el Sagrario de la Catedral una función muy regia con el Santísimo: patente, sermón y depósito, y asistió el señor virrey, su señora esposa, la Nobilísima Ciudad y el señor arzobispo don Alonso Núñez de Haro, y no fueron con el virrey más que cuatro alabarderos de la guardia del día.

El día 1e de este mes en México, fueron electos los alcaldes ordinarios, siendo de Primer Voto don Tomás Domingo de Acha, y de Segundo don Pedro Le- mus. No salieron del Ayuntamiento los regidores sino hasta las cuatro de la tarde, por haber habido entre ellos discordias, y habiendo pasado dos de éstos a dar parte al virrey, se mandó llamar al asesor general y se definió el punto, y por ser tarde no asistieron a la procesión de Santo Domingo, que fue el primer año que faltaron a ella.

El día 2 de enero de 1786, salió de México la señora virreina viuda doña Ana de Zayas para el puerto de Veracruz, y de allí a España. El virrey conde [[13]](#footnote-13)

de Gálvez y su esposa la acompañaron hasta más allá del Santuario de Nuestra Señora de Guadalupe, y la llevaron en su coche, a la derecha, y la señora condesa en el vidrio, y no se le hicieron honores de tropa y artillería porque no quiso; fue su salida de Palacio el día lunes a las ocho y media de la mañana.

El día 10 de enero de 1786 en México, entró el Correo de España con las cédulas de oidores a los señores don Cosme de Mier y Trespalacios y a don Juan Francisco de Anda; de alcalde de Corte al señor don Modesto Salcedo. Todos tomaron posesión de sus empleos la mañana del día 14 en el real acuerdo con asistencia del señor virrey. Y este mismo día, entró el Primer Escuadrón de Dragones del Regimiento de España, y se publicó bando para las fiestas de tres días: 16,17 y 18, por los casamientos de los señores infantes, con luminarias y cortinas.

El día 17 de enero de 1786, fue la misa de gracias con toda solemnidad en la Catedral, con asistencia del virrey, la Real Audiencia, los tribunales y corporaciones con los doctores borlados. La misa la celebró el señor deán.

El día 20 de enero de 1786, día de San Sebastián, llegó Correo de España, y se juntaron dos misas de gracias, una por ser año del rey y otra por el correo; y éste trajo la noticia de que el gobernador de Puebla pasaba de intendente a provincias internas, y que el señor don José de Flon pasaba a gobernador de Puebla. Este día hubo besamanos en Palacio, en la tarde paseo, y en la noche comedia con loa y baile en el Coliseo. A todo asistieron los señores virreyes; concluida la primera jornada regresaron a Palacio, donde se siguió un gran baile por ser día del rey don Carlos III, que cumplió 70 años.

Nota

El día 17 de enero de 1786, en el puerto de Veracruz, a las doce del día, se hizo a la vela el navio en que iba a España la señora virreina viuda de don Matías de Gálvez, doña Ana de Zayas.

El día 1Q de este mes entró a México el señor don Pedro Mendieta, que venía de subinspector.

Diario de sucesos de México • ¡53

El día 2 de febrero de 1786, entró a esta capital el señor coronel don Felipe Díaz de Ortega, que venía de gobernador intendente de Durango.

El día 3 de febrero de 1786, sacaron de la Acordada dos hombres para ajusticiarlos, y este mismo día salió de las cárceles la cuerda de presidiarios.

El día 7 de febrero de 1786 en México, murió el señor don Juan Lucas de Lassaga, regidor de México, director general de Minería y caballero de la distinguida Orden de Carlos III, y fue sepultado en el convento de San Francisco con la asistencia del Tribunal de Minería, la Nobilísima Ciudad, todos los caballeros de dicha orden y toda la nobleza de esta ciudad.

El día 8 de febrero de 1786 en México, sacaron los padres de la Merced en tres carros muy compuestos, el dinero recolectado para la Redención de Cautivos, que hic la cantidad de ciento cincuenta y tres mil ochocientos cincuenta y siete pesos, dos reales.

El día 15 de febrero de 1786, salió la tropa para Manila; todos fueron juzgados y cogidos de leva.

El día 24 de febrero de 1786 en México, en todas las iglesias se publicó edicto del señor arzobispo don Alonso Núñez de Haro, que concedía indulto para que en la Cuaresma próxima que comenzará el día le de marzo, se comiese carne, guardando la forma de ayuno, menos los días viernes y sábado.

El día 25 de febrero de 1786, en la parroquia de Santa María la Redonda, bendijo el señor arzobispo de México un campo santo para enterrar en él a los muertos de varias parroquias.

El día 28 de febrero de 1786 en México, a las once y media de la noche, murió el señor don Vicente Ruperto Luyando, oidor de la Real Audiencia, y el día 2 de marzo fue sepultado en el convento de Santo Domingo.

El día 3 de este mes a las nueve y media de la mañana, hubo un temblor de tierra en esta capital.

El día 4 de marzo de 1786, entró en México don Manuel Flon, que iba de gobernador a Puebla.

El día 6 de marzo de 1786 en México, a las doce y media de la noche, murió el señor don Joaquín Velázquez de León, alcalde honorario de Corte, director general del Real Tribunal de Minería, y fue el hombre más instruido

en todas facultades que tenía el reino. Fue sepultado el día 8 en la iglésia de San Francisco. »

El día 19 de marzo de 1786, en el Real Palacio, se celebró el cumpleaños del señor ministro don José de Gálvez. Hubo besamanos, refresco y baile en la noche. En la tarde se estrenó un barco llamado Señor San José, alias La Felicidad, en que fueron los señores virreyes de pasco a Ixtacalco, y los marineros Rieron ocho oficiales de varios regimientos con el uniforme del Batallón de Voluntarios de Gálvez, es decir, con casacas encarnadas cortas, solapa morada y tres ojales de galón de oro, chupa y calzones blancos largos, zapatos blancos y banda morada. El sombrero era negro a la española antigua con una pluma blanca y dos negras.

El día 20 de marzo de 1786, en presencia del señor virrey, hicieron su juramento el señor don Jacobo Ugarte y Loyola, de comandante intendente de Provincias Internas, y el señor don Pedro Mendicta de subinspector, en lunes.

El día 24 de marzo de 1786, en el Real Palacio, en junta de Real Hacienda, se vio el pedimento de aumento de sueldo de la Compañía de Alabarderos. El día 30 salió la junta para las firmas, en que se determinó que se diera cuenta a Su Majestad con el aumento de 20 soldados más, y cuesta el testimonio a los alabarderos 79 pesos, un real. Saldrán estas diligencias en el correo del mes de abril de 1786.

El día 25 de marzo de 1786, en la Santa Iglesia Catedral, predicó el señor arzobispo don Alonso Núñez de Haro y Peralta, y asistieron el señor virrey y su esposa, y los dos estuvieron en la jaula, y fuimos de sitial dos alabarderos, yo José Gómez y don José Mendieta, y fue en domingo cuarto de Cuaresma.

I

Nota *

Adviértese que este señor virrey fue el primero que ocupó la jaula en el nuevo lugar, enfrente del pulpito, donde se pone el sitial de Su Excelencia.

El día 26 de marzo de 1786, en el Real Palacio, se empezaron a repartir unos papelones con instrucciones del señor virrey para los alabarderos, y uno de los ejemplares quedó fijado en el Cuerpo de Guardia para control de entradas, salidas y recados de todos los sujetos de esta Corte y de fuera, y lo que había de hacer el cabo de dicha guardia.

Diario de sucesos de México • 155

El día 27 de marzo de 1786 en México, en la iglesia de los padres be- tlemitas, se hicieron con gran pompa y solemnidad los honores al reverendo padre general fray Juan Ángel, en lunes.

El día 29 de marzo de 1786, salió de esta ciudad para Sonora, el comandante general de Provincias Internas y brigadier, don Jacobo Ugarte y Loyola.

El día 30 de marzo de 1786 en México, hicieron una denuncia al señor virrey de que al pie de la Casa Profesa, en cierto lugar, había dinero enterrado, por lo que mandó se cavase y se pusiese guardia del Regimiento de la Corona. Estuvo excavándose hasta el día 31 por la noche, pero no se encontró nada y se mandó tapar el hoyo. Asistieron a esta excavación el secretario de Guerra don José Caraballo, y el caballerizo de su Excelencia don Francisco Carrillo.

*Q^Sbril de 1786*

El día 3 de este mes, a las seis y media de la tarde, hubo un temblor de tierra en esta capital, igual al que se dio el 4 de abril de 1768, a las seis y media de la mañana, y al que hubo el año de 1776 a las cuatro de la tarde, el día 21 del mismo. Todos estos temblores han sido de diez en diez años, y todos muy grandes. El primero fríe siendo virrey el señor marqués de Croix, y el segundo siendo virrey el señor Bucareli.

El día 4 de abril de 1786 en México, entró el Correo de España, y no se repicó ni hubo misa de gracias, y en éste le vino al señor fiscal de la Real Hacienda don Ramón de Posada, la diligencia concluida de la cruz de la distinguida Orden de Carlos III que le impuso el virrey el día 6, y también vino la noticia de que a don Manuel... lo habían hecho contador del Tribunal de Millones en Madrid, y la gracia de ministro de Hacienda. También vino la noticia de que al señor don Victoriano López, obispo de Puebla, lo habían ascendido a obispo de Tortosa en España.

El 8 de abril de 1786 en México, fue día de la mayor novedad que ha habido en este reino, y fríe el caso, que saliendo de la cárcel de la Acordada tres hombres para ajusticiarlos, sucedió la casualidad que en la estación de la cárcel al suplicio, venía el virrey conde de Gálvez a caballo del Pensil Americano, y habiéndolos encontrado, los perdonó en nombre del rey nuestro señor, por lo que la plebe empezó a decir en alta voz ¡viva el señor virrey conde de Gálvez!

Nota

Los tres reos perdonados por el virrey se llamaban uno, Francisco Gutiérrez, español, soltero de esta ciudad; otro José Venancio Sotelo, mulato casado con María de los Santos, y el otro Antonio Valentín, mulato casado con María Toribia.

El día 16 de abril de 1786 en México, se hizo en el Real Coliseo por cuenta del señor virrey como director general, y en sociedad con los señores don Francisco José Mangino, el coronel de la Corona don Juan Cambiazo y el contador del Tabaco don Silvestre de la Vega, la nueva presentación de la comedia de Indias por contrafinezas, el día 17 Fineza contra fineza, y el día 18, No hay contra la alta cautelas. A estas funciones se entraba con boleto, lo que nunca se había visto en México, y fue en domingo, lunes y martes de Pascua de Resurrección. (Vid. Día 12 de enero de 1787).

El día 19 de abril de 1786 en México, se publicó el bando con ataba- lillos para traer a Nuestra Señora de los Remedios.

El día 20 de abril de 1786 en México, llegó aviso de España y no trajo cosa particular; al día siguiente fue la misa de gracias.

El día 21 de abril de 1786, pasó el señor virrey al pueblo de Chapul- tepec, y habiendo visto en una casa un muerto, preguntó por qué no se le había enterrado, y contestáronle sus familiares, que porque no tenían con que pagar los derechos del cura, al que su Excelencia hizo llamar, y le dijo que lo enterrase, que él pagaría lo que fuera: el cura respondió que lo haría al otro día porque ya no estaban los cantores, a lo que su Excelencia replicó que no importaba, pues aquella tarde se había de enterrar, que él ayudaría a cantar el responso. Así es que el señor virrey asistió al entierro y ayudó a cantar y dio a la viuda 16 pesos para los gastos. Esta ha sido una gran acción de un príncipe muy cristiano.

El día 25 de abril de 1786, fue día de la letanía en Santo Domingo, pero por estar la Virgen de los Remedios en Catedral, no llegó sino hasta el siguiente día.

El día 29 de abril de 1786 en México, se publicó el bando de residencia del señor oidor don Juan Antonio Uruñucla, que se halla en el día de regente de Guatemala, y fue el juez el señor oidor don Eusebio Ventura Beleña.

El día 30 de abril de 1786 en México, a las cinco de la mañana, salió el Correo a España, en el cual iban las diligencias del aumento de sueldo de la Compañía de Alabarderos, siendo virrey el conde de Gálvez_nuestro protector.

Diario de sucesos de México • 157

*Q^h Cayo de 1786*

El día 3 de este mes, llevaron por la tarde de procesión general a la Virgen de los Remedios hasta la iglesia de la Santa Veracruz, y de ahí se fue a su santuario el día 4.

El día 5 de mayo de 1786, sacaron de la Acordada 42 hombres, incluso una mujer, dándoles 200 azotes. Este mismo día sacaron de la cárcel de Corte a un hombre y una mujer hija suya, con la que había estado en incontinencia por espacio de quince años, y había tenido cuatro hijos, cosa bien escandalosa y gran pecado. Y este mismo día, en el Real Coliseo, se presentó un italiano llamado Carlos Falconi, y mostró habilidades que jamás se habían visto en México.

El día 6 de mayo de 1786, en la Real Audiencia, presentó su juramento de gobernador de Puebla el señor don Manuel de Flon.

El día 7 de mayo de 1786 en México, en el ejido de la Acordada, hizo ejercicio general de Riego el Regimiento de Zamora, y asistió el señor virrey y un crecido número de personas de distinción de esta ciudad. Y este día en el Real Palacio, empezó a haber guardia en la antesala del virrey, siendo el primero don Miguel de Campos, teniente de Dragones del Regimiento de España, que era para recibir órdenes de su Excelencia, mismo que sería reemplazado cada semana por otros oficiales de cada regimiento. Y es la primera vez que en este orden se ha visto en México.

El día 11 de mayo de 1786 en México, salió el señor don Manuel de Flon para su gobierno en Puebla.

El día 13 de mayo de 1786 en México, a las nueve de la noche, entró Correo de España, y en éste le vino licencia de casarse al marqués de San Cristóbal, hijo del conde de Regla, con una hija de don Diego García Panes.

El día 14 de mayo de 1786 en México, salieron del Sagrario de la Catedral los sacramentos para los presos del Arzobispado. Y sucedió la casualidad que habiendo llegado el Correo de España, y habiendo mandado el señor virrey que se repicara por la salud del rey, a la vuelta de los sacramentos, se echó el repique general de esquilas en todas las iglesias, con que se aumentó grandemente la función.

El día 15 de mayo de 1786, Ríe la misa de gracias por la salud del rey y no asistió el señor virrey. Y este día en el Real Palacio a las siete y media de la

mañana, cayó muerto el señor Gregorio Cisneros, zapatero del virrey.

El día 26 de mayo de 1786 en México, en la Real Universidad, hubo un acto de cánones y leyes presidido por el canónigo don Primo de Rivera, como se acostumbra para recibir a los señores virreyes como vicepatronos. Asistió su Excelencia el conde de Gálvez con su esposa, y lo defendió el bachiller don Juan Ignacio González, alumno del Seminario, y replicaron los señores doctores don Agustín Beye, don Andrés Valdés y don Joaquín Gallardo, rector. Este mismo día salió la cuerda de presidiarios tie las tres cárceles.

El día 28 de mayo de 1786, en el Sagrario de la Catedral, se estrenó el colateral de San Cayetano en la puerta de la sacristía, a costa de los señores sacerdotes. Y este mismo día, salió a España el duplicado del aumento de sueldo de los alabarderos, y a la misma hora entró el correo que trajo la fatal noticia de haberse perdido en las costas de Portugal el navio San Pedro de Alcántara, que venía de Lima, y asciende la pérdida en dinero y efectos a diez millones de pesos.

El 30 de mayo de 1786, día de San Fernando, hubo besamanos en Palacio, por tener este nombre un hijo del príncipe de Asturias, y para ello se citaron a los tribunales, oficialidad y prelados de las comunidades.

*unió de 1786*

El día 1Q de este mes, salió de México el señor virrey de paseo con sil familia a San Agustín de las Cuevas, y volvieron el día 10. Pero más que un paseo de diversión fue de confusión: hubo dos días de toros, peleas de gallos, fandangos y juegos en todas las casas, plazas y calles de todas clases, e incluso peleas de perros. De modo, que desde que se conquistó este reino, no se había visto jamás cosa semejante, ni virrey más aplaudido y vitoreado que el señor conde de Gálvez.

El día 12 de junio de 1786, en la calle de Santo Domingo, frente a la

puerta del costado de la iglesia, se incendió la tienda de una mestiza a las once

y media de la noche, y duró hasta las dos de la mañana en que se quemó todo.

1

Asistió el señor virrey con la tropa de dragones y dos alabarderos para cortar el fuego, y que no cundiese a las demás casas, f fue en lunes.

El día 15 de junio de 1786 en México, fue día de Corpus, y no asistió el señor virrey a la misa sino a la procesión, y salió solo de Palacio a pie, entrando

Diario de sucesos de México • 159

por la puerta de costado de la Catedral, por donde lo hace el señor arzobispo. De regreso volvió a Palacio a pie, acompañado por el Ayuntamiento de la ciudad y algunos oidores. La señora virreina, su hermana doña Victoria Saint- Maxent y toda la familia, fueron a ver la procesión a la calle de San Francisco en la casa del conde de San Pedro del Álamo, y allí se quedaron a comer sólo con dos alabarderos. Este día, por estar enfermo el señor arzobispo, sacó el Santísimo Sacramento el señor canónigo don Gregorio Omaña, tesorero de la Santa Iglesia Catedral, y no marchó la Compañía del Comercio por la calle de Plateros, por estarse arreglando. En la noche, llegó a México el padre fray Francisco Caldas, capuchino que venía de capellán del señor virrey.

En este mes de junio en México, se vio que en la alhóndiga se vendían 15 mazorcas de maíz por medio y trigo revuelto, y el día 17 se empezó a vender maíz y ocho semitas por medio, esto es, que el que llevaba medio de maíz había de llevar medio de semitas.

El día 18 de junio de 1786 en México, fue la procesión de Corpus del convento de San Agustín, y por esta razón, el padre prior solicitó al capitán de Alabarderos seis de éstos para que llevasen el palio, como así se hizo, siendo yo, José Gómez, el cabo don Bernardo de Calderón, don Juan y don Agustín Zapata, don Eusebio Rivas y don Felipe Guardiola, bajo la supervisión del alférez don Juan Alberto Badamés, por instrucciones de nuestro capitán el señor don Mariano de Velazco Núñez de Villavicencio. Y es la primera vez que nos convidan a esta función.

El día 22 de junio de 1786, octava de Corpus, asistió el señor virrey con todos los tribunales a la misa y a la procesión.

El día 23 de junio de 1786 en México, en el ejido de la Acordada, se ajusticiaron seis reos, tres ahorcados y tres agarrotados y después quemados. Uno de ellos fue ejecutado por pecado bestial con una yegua tordilla, a la que mataron y quemaron también, y otros dos por sodomáticos.

El día 26 de junio de 1786 en México, a las tres menos cuarto de la mañana, hubo tm temblor de tierra, y a las diez entró el Correo de España con una real cédula nombrando al señor don Miguel Calixto de Acevedo, oidor de la Contratación de Indias, y al señor don Andrés Fernández de la Madrid, la obtención de media ración en la Catedral de México. También vino la noticia de que la señora virreina doña Ana de Zayas, madre del conde de Gálvez, había llegado felizmente a Cádiz, después de 31 días de viaje desde La Habana, cosa pasmosa. Finalmente le vino al señor Primo de Rivera que tenía media ración, ración entera.

El día 27 de junio de 1786 en México, sacaron de la cárcel de la Acordada 32 hombres, dándoles 200 azotes por las calles públicas, y el primero llevaba colgado al cuello un farol y el segundo un manojo de gallinas, y fue

en martes.

El día 29 de junio de 1786, día de San Pedro, fue la función de gracias y asistió a la misa el señor virrey, no así el señor arzobispo por estar enfermo. Al día siguiente en la Catedral, en el coro, tomaron posesión de sus raciones los señores Primo de Rivera y Fernández de la Madrid.

El día 1Q de este mes en México, murió el señor canónigo Calderón en sábado, y el día 2 por la tarde fue enterrado en la Catedral.

El día 3 de julio de 1786 en México, a las siete de la noche, se sintió un fuerte temblor de tierra. Y este día en la tarde, trajeron a enseñar al señor virrey tres criamras que nacieron en un solo parto el día 29 de junio en la Provincia de Chalco, en un rancho llamado San Juan, siendo sus padres Manuel Vega, español, y Nicolasa Gertrudis. A estos niños muy robustos les pusieron Pedro.

El día 4 de julio de 1786 en México, sacaron de la cárcel de la Acordada a un hombre español, dándole 200 azotes sin perjuicio de la causa, por ladrón, escalador e incendiario. Y este día en el Santuario de Nuestra Señora de Guadalupe, tomó posesión de arcediano el señor don Francisco Vélez.

El día 7 de julio de 1786, salió de México la cuerda de presidiarios de las tres cárceles.

El día 8 de julio de 1786 en México, se publicó un bando mandando que ningún amo marcase a los negros ni en la cara ni en el cuerpo, cosa muy bien determinada y santa.

El día 10 de julio de 1786, fue día de la señora virreina, y se hizo en el Coliseo una fundón que desde que México es México no se había visto otra mejor, ni creo que se verá, y fue en día de Santa Felicitas.

El día 17 de julio de 1786 en México, se puso el señor conde de Santiago don Juan de Velasco, su uniforme de la Real Maestranza de Ronda de esta ciudad.

El día 20 de julio de 1786, salió de México para la ciudad de Durango el señor don Lorenzo Esteban Tristán, nombrado obispo de aquella Diócesis.

Diario de sucesos de México • 161

El día 23 de julio de 1786 en México, en el convento de San Lorenzo,

tomó el hábito de monja la esposa de don José Mateos, el cual aún vive pero

divorciado de ella y es capitán de Milicias.

El día 25 de julio de 1786, a las diez de la noche, entró el Correo de España y no trajo más novedad que la que al señor conde de Correili lo habían retirado con su sueldo; pero con la condición de que no lo gozaría si salía de España.

El día 27 del mismo, fue la misa de gracias y no asistió el señor virrey por estar un poco malo.

El día 30 de julio de 1786 en México, se cruzó en la iglesia de Monse- rrate de caballero de la Orden de Alcántara, el capitán de Milicias don Benito Medina.

Nota

Adviértese que este nuevo caballero dijo a los alabarderos, que con respecto a las propinas, la Constitución de su orden prevenía que no diera nada.

El día 3 de este mes en México, sacaron de la cárcel de la Acordada cinco reos para ajusticiarlos, tres españoles en la horca y dos indios con garrote. La cabeza de uno de los ahorcados la pusieron enfrente de la Catedral, en la esquina que llaman de Juan Puerco, y como hubiese pasado por allí su Divina Majestad, la misma tarde la mandaron quitar. Pero como hallábanse ahí dos comisarios de la Acordada cuidándolo, se armó mucho alboroto y discusión sobre si se debía de quitar o no, con lo que hubo su medio motín, mas al fin la quitaron y se la llevaron al Sagrario donde fue enterrada, en jueves.

El día 5 de agosto de 1786 en México, en la Real Lotería, el señor don Jerónimo Gil, director general de la Academia de San Carlos, se sacó el premio de cuatro mil pesos. De estos dio dos mil de limosna para los clérigos pobres, mil cuatrocientos para los mendigos de todas clases, y seiscientos pesos para las ánimas. Así lo ha hecho este señor en todas las loterías en que ha sido premiado.

Los días 12 y 13 de agosto de 1786 en México, fueron los de la salida del Pendón en memoria de la conquista de México: lo sacó don Antonio

Rodríguez de Velasco, regidor, y no asistió el señor virrey por hallarse en el pueblo de San Ángel enfermo, mudando de temperamento.

El día 17 de agosto de 1786 en México, se presentó al señor virrey el coronel de Milicias de Oaxaca don Juan Francisco de Echarri, para darle parte de haberse cruzado en la Orden de Santiago en la villa de Orizaba.

El día 18 de agosto de 1786 en México, se publicó un bando para que cesara la manda torzosa en favor del beato Gregorio López.

El 20 de agosto de 1786 en México, día del señor virrey, hubo en Palacio besamanos, refresco en la noche, y en el Coliseo una función muy buena con la comedia El inocente culpado, dos loas, una representada y una cantada, y un gran baile. Este mismo día en Palacio, vino el Cuerpo de Sargentos del Regimiento de la Corona a ponerle una charretera de sargento segundo al niño Miguel, hijo del virrey. Y por el correo de España que entró a las cinco de la mañana, se supo que al caballerizo de su Excelencia don Francisco Carrillo, se le había aprobado por el rey la plaza de contador de Menores que servía el difunto coronel don Juan Lucas Lazaga.

El día 19 de este mes en México, en el Real Palacio, se empezó una música desde la una del día hasta las tres de la tarde mientras comía el señor virrey, para divertirlo porque estaba muy malo.

El día 22 de septiembre de 1786 en México, sacaron de la cárcel de la Acordada 18 hombres para darles 200 azotea por varios delitos. Y fue siendo el capitán de la Acordada don Manuel de Santa María.

El día 23 de septiembre de 1786 en México, se supo por el Correo de España que el tío del señor virrey, don Miguel de Gálvez, había sido nombrado embajador de España en la Corte de Prusia. Y también trajo la noticia de que el nuevo general de los agustinos sería el reverendo padre Benicili de Nacían, originario de Italia.

El día 29 de septiembre de 1786 en México, en el convento de San Juan de Dios, fue el primer año en que hubo una función de Corpus en viernes, día de San Miguel. Y este día le pusieron al hijo del señor virrey las dos charreteras de sargento primero del Regimiento de la Corona.

Diario de sucesos de México **163*

*(Octubre de 1786*

El día Io de este mes en México, en la iglesia de Santo Domingo, se estrenó en la capilla del Rosario una magnífica colgadura de terciopelo carmesí con galón y fleco de oro. Y este día, pusieron en la puerta del Sagrario de la Catedral a dos hombres con mordazas, por testigos falsos, y murió don Luis María Luyando de Aguirre, regidor y teniente coronel de Milicias. Este caballero juró como alférez real a Su Majestad Carlos III, el 25 de junio de 1760. Asistió a su entierro la tropa de Milicias en número de 216 hombres con sus correspondientes oficiales.

El día 9 de octubre de 1786, día en que salió de México la cuerda de presidiarios de todas las cárceles, sacaron tres hombres de la Acordada para ajusticiarlos: dos con garrote y uno ahorcado. Y este mismo día en el Real Palacio, hubo junta de médicos por hallarse muy malo el señor virrey.

El día 13 de octubre de 1786, sacramentaron al señor virrey en público, y fue una de las mayores funciones que se han visto, pues asistieron todos los tribunales, frailes de todas las religiones, curas de las parroquias, y trajo el Sagrado Viático el señor deán de la Catedral don Leonardo Terraya, y éste le dio la comunión estando presente el señor arzobispo don Alonso Núñez de Haro. Una noche antes se afeitó el señor virrey y el día de la comunión, por la mañana, se vistió con el uniforme de teniente general, recibiendo la eucaristía de pie, a las once del día.

El día 26 de octubre de 1786, sacaron de la cárcel de la Acordada tres hombres para ajusticiarlos: uno agarrotado y dos en la horca; uno por monedero falso y el otro que era un muchacho, por pecado bestial.

El día 27 de octubre de 1786 en México, murió don José Villarreal, capitán de las Milicias de Guanajuato y compadre del señor virrey como padrino de bautizo del hijo de su Excelencia, Miguel. El día 29 se le enterró en el Sagrario de la Catedral, y vinieron 20 hombres del Regimiento de la Corona y no se hizo descarga para los honores ni se doblaron campanas, para que no lo sintiera el señor virrey que se hallaba muy malo; en fin, fue un entierro muy chabacano y muy pobre de ocho clérigos.

El día 28 de octubre de 1786 en México, a las diez y media de la noche, tembló y repitió después de las once de la misma noche, en sábado.

El día 31 de octubre de 1786, a las cinco de la tarde, sacaron al señor virrey de Palacio en una litera para Tacubaya, a mudar temperamento porque estaba muy malo. Lo acompañó la Escuadra del Regimiento de Alabarderos al mando del cabo don Pedro Palacios.

*^y^nviembre ¡ic 1786*

El día 5 de este mes en México entró el Correo de España, y en éste le vino al coronel don Juan Cambiazo el nombramiento de gobernador y capitán general de Manila en las islas Filipinas. Este correo correspondía al mes de octubre, que se atrasó.

El día 7 de noviembre de 1786, fue la misa de gracias y la última a la que asistió el señor regente don Vicente de Herrera.

El día 8 de noviembre en México, entró el señor regente nuevo don Eusebio Sánchez Pareja, que venía de Guadalajara, y fueron a recibirlo hasta el Santuario de Nuestra Señora de Guadalupe el oidor decano don Antonio de Villaurrutia y el subdecano don Baltasar Ladrón de Guevara, en compañía de la Escuadra de Alabarderos, como es costumbre. Y este día en Tacubaya testó el señor virrey y entregó el gobierno a la Real Audiencia.

»

Nota

El día 8 en la noche, sucedió un caso bien memorable y fue, que estándose para casar el hijo del señor mariscal de Castilla don Francisco Gorráez y Luna, con la hija del señor marqués del Valle Ameno, doña María Manuela Moreno, huyó el novio al cerro de Nuestra Señora de Guadalupe, donde lo encontraron el día 10 de este mes, pero insensato, por lo que lo llevaron al convento del Carmen donde se quedó. Se habían de haber dado las manos la noche del 11 y velado el día 12, por lo que se quedaron las donas y la comida hecha. Unos dicen que el novio tenía razón, otros que la novia, pero esto se verá con el tiempo. Lo cierto es que el día 18, al fin fue el casorio, y quien les dio la bendición fue el señor arzobispo don Alonso Núñez de Haro, en sábado.

El día 9 de noviembre de 1786 en México, en el real acuerdo, tomó posesión de nuevo regente don Eusebio Sánchez Pareja.

Diario de sucesos de México [[14]](#footnote-14) 165

El día 16 de noviembre de 1786 en el pueblo de Tacubaya, le dieron al señor virrey conde de Gálvez el santo óleo, y antes hizo un razonamiento a toda la familia muy lastimoso y a todos los que le oyeron.

El día 21 de noviembre de 1786 en México, montó guardia en Palacio por primera vez el señor capitán de Zamora don Manuel Guillas, hijo del señor marqués de Guillas don Joaquín de Monserrate, virrey que fue de este reino. Dicho señor don Manuel venía de España e hizo su guardia en martes.

El día 22 de noviembre de 1786 en México, entró el Garreo de España, y en este aviso vino aprobado el indulto que dio el señor virrey a los tres reos de la Acordada. (Vid. 8 de abril de 1786).

El día 27 de noviembre de 1786 en México, ahorcaron en el ejido de la Acordada cinco hombres, y dos fueron puestos a la vergüenza.

El día 28 de noviembre de 1786 en México, se hicieron en la Iglesia Catedral las honras militares, presididas por el señor brigadier don Juan Cambiaso, por hallarse muy malo el señor virrey en el pueblo de Tacubaya.

Muerte del señor virrey conde de Gálvez

El día 30 de noviembre de 1786, en el pueblo de Tacubaya, a las cuatro y veinte minutos de la mañana, murió el señor virrey conde de Gálvez, mismo que gobernó un año, cuatro meses y trece días. El día 4 de diciembre fue el entierro en la Santa Iglesia Catedral, por lo que quedó la Real Audiencia gobernadora y la Capitanía General en su real acuerdo.

Nota

Por la muerte del señor virrey se tiraron tres cañonazos, y la Compañía de Guardia y la de Alabarderos que pusieron sus armas a la funerala, estuvieron desde el día 30 de noviembre hasta el día 4 de diciembre, en que fue depositado el cadáver de Su Excelencia en la bóveda de la Catedral.

*(diciembre de 1786*

El día 7 de este mes en México, murió el señor coronel del Comercio don Juan José Pérez Cano. El día 9 fue enterrado en el Carmen. •

El día 11 de diciembre de 1786 en México, murió el señor oidor don Joaquín Gordiano, y el día 12 se enterró en la tarde en el Sagrario.

Nota

El día 11 en el Real Palacio, a la una y cuarto de la noche, parió una niña la señora virreina doña Felicitas Saint-Maixent? y se bautizó el día 19, y le pusieron los nombres siguientes: María de Guadalupe, Bernarda, Felipa de Jesús, Isabel, Juana Nepomucena y Felicitas, y en la confirmación: Fernanda. Fue padrino de aguas la Nobilísima Ciudad de la que era corregidor el señor don Francisco Crespo, y madrina la señora doña Josefa Villanueva, mujer que era de don José Ángel de Aguirre, regidor decano, y de confirmación el señor don Fernando José Mangino, y el señor arzobispo don Alonso Núñez de Haro le echó el agua y la confirmó, todo en el mismo día 19. Fue ésta la mayor función que se ha visto en esta ciudad, con iluminación y Riegos en la noche. Regaló la ciudad a la señora virreina un hilo de perlas que costó once mil pesos, y otro para la niña que costó cinco mil. El señor arzobispo dio plato, cuchara, tenedor y cuchillo de oro, y lo mismo el señor Mangino. La señora virreina viuda regaló a la comadre un corte de vestido bordado que valía mil pesos, al señor arzobispo una* caja de oro guarnecida de esmeraldas, y un pectoral de diamantes, y al señor Mangino dos cortes de vestidos muy especiales, y al señor corregidor un bastón con puño de oro guarnecido de diamantes.

El día 17 de diciembre de 1786, murió el señor don Domingo de Rábago, conde de Rábago, pero sin sacramentos por descuido de los médicos.

*€áko* *de 1787.* Enero

El día 1Q de este mes en México, salieron de alcaldes ordinarios de Primer Voto el conde de Regla don Pedro Romero de Terreros, y de Segundo, don Gabriel Iturbide, siendo la Real Audiencia gobernadora.

El día 2 de enero de 1787, entró el aviso*de España y no trajo cosa especial. Al día siguiente Ríe la misa de gracias, y ésta Ríe la primera a la que asistió la Real Audiencia gobernadora por muerte del señor conde de Gálvez. [[15]](#footnote-15)

Nota

En este aviso de! día 2 vino la novedad de que ninguno de los oficinistas de la Secretaría de Gobierno, Tabaco, Aduana, Cajas Reales y Lotería, usasen uniforme, sino sólo los que gozasen del iuero militar.

El día 12 de enero de 1787 en México, en el Real Coliseo, se presentó por cuenta de los accionistas que había dejado el señor virrey don Bernardo de Gálvez, la comedia de El más justo rey de Grecia, que es la única que se ha visto sin ninguna dama sino toda de hombres, y fue en viernes.

El día 20 de enero de 1787 en México, en el Paseo de la Alameda, se renovaron y pintaron las cinco pilas que allí había, y en la pila mayor con sus estatuas echando agua, que antes no lo hacían, se estrenó una taza de bronce que pesó 64 quintales, tal como lo dejó dispuesto el señor virrey conde de Gálvez.

El día 22 de enero de 1787, en el real acuerdo, tomaron posesión de oidores los señores don Miguel Bataller y don Francisco Javier Ignacio Mal- donado, y fue en lunes.

El día 23 de enero de 1787 en México, en la Santa Iglesia Catedral, predicó un fraile mercedario, pero como a éste se le fue el sermón, ya no lo hubo ese día.

El día 24 de enero de 1787 en México, entró el Correo de España con la noticia de que el rey nuestro señor estándose afeitando, le dio un parasismo que lo mantuvo cinco minutos privado, lo cual puso en mucho cuidado a la familia real y a toda la Corte. En este correo vino también la noticia de la muerte del señor Orreli, el cual haciendo su testamento fue preguntado que a quién dejaba de heredero, y respondió que al primero que pasase por la calle, y habiendo pasado al mismo tiempo el conde de Tepa don Francisco Viana, lo llamaron y él file el heredero; cosa bien memorable. También vino en este correo la cruz de la distinguida Orden de Carlos III al señor secretario don Francisco de Córdoba, y al señor don Juan Antonio Riaño el gobierno e intendencia de la ciudad de Valladolid.

El día 25 de enero de 1787 en México, sacaron de la cárcel de la Acordada 16 hombres, dándoles 200 azotes, en jueves.

El día 26 de enero de 1787 en México, fue la misa de gracias por la salud del rey y por la llegada del Correo de España. Pero por estar indispuesto el señor regente de este reino y no haber podido asistir por estar enfermos

el decano y subdecano de la Real Audiencia, asistió con el bastón de mando el señor oidor don José Antonio de Urízar, que es el que seguía en jerarquía a aquellos señores. '

El día 28 de enero de 1787 en México, en la sala de besamanos del Real Palacio, el señor regente don Eusebio Sánchez Pareja puso la cruz de la Orden de Carlos III al señor don Francisco Fernández de Córdoba y Sayas, en presencia de la Real Audiencia gobernadora y de varios caballeros de dicha orden. Leyó la cédula el secretario don Juan Martínez de Soria, quien dio de gratificación a los alabarderos 24 pesos, cuyo número es el que asistió de guardia.

El día 30 de enero de 1787, en el Real Palacio, montó guardia el Regimiento de la Corona por haberse retirado el Regimiento de Zamora que se iba para Veracruz, en martes.

El día 31 de enero de 1787 en México, se comenzó la obra de la Catedral que dejó dispuesta el señor conde de Gálvez.

El día 1fi de este mes en México, se hizo la elección de prior y cónsul tocante al Tribunal del Consulado, y salió de prior el señor don Francisco Bazo Ibá- ñez, y de cónsul menor el señor don Servando de la Cortina. Esta elección se hace siempre el día 8 de enero, pero por haber salido los votos discordes y haberse apelado a la Real Audiencia se demoró mucho, en jueves. Y este día salió la cuerda de presidiarios de las tres cárceles.

El día 3 de febrero de 1787 en México, sacaron de la Acordada tres individuos para ajusticiarlos. Uno de éstos que tenía dieciocho años, ahorcó a siete pobres pastores para robarles, y otro que era su hermano, de edad de trece años, lo sacaron a la vergüenza por cómplice.

El día 5 de febrero de 1787 en México, en el Real Palacio, se hizo la elección entre los alabarderos de mayordomo, sacristán y diputados. Salió reelegido de mayordomo el alférez don Juan Alberto Badamés, de sacristán yo José Gómez, y de diputados don Juan Zapata y don Joaquín del Castillo, en lunes, día de San Felipe de Jesús. Y este mismo día salió de México la primera división del Regimiento de Zamora que iba para Veracruz.

El día 8 de febrero de 1787 en México, murió el dignatario y maestro de Escuelas don Cayetano de Torres, capellán que era de las reverendas madres ca-

Duirio de sucesos de México • 169

puchinas, y el día 9 en la tarde lúe su entierro muy lucido en Catedral. El mismo día 8, don Benito Cuéllar, uno de los pajes del difunto virrey conde de Gálvez, casó con una de las damas de la señora virreina, doña María Josefa Otero, y íue su madrina la señora condesa de Santiago doña María Ignacia Calvo.

El día 14 de febrero de 1787 en México, murió la señora doña Juana María de Velasco, hija del conde de Santiago y mujer del señor oidor don Cosme de Mier y Trespalacios, y el día 15 fue sepultada en el convento de San Agustín, donde fue depositada en su sacristía como heredera del marquesado de Salvatierra, después de haber estado expuesta en el Colegio de San Gregorio y en el santuario de Nuestra Señora de Loreto. El entierro fiie solemnísimo, con la asistencia de toda la nobleza, la Real Audiencia, ia Nobilísima Ciudad, el Regimiento de Alabarderos y la Compañía de Dragones de España. El primer doliente fue el señor capitán del Regimiento de Alabarderos don Antonio de Velasco, tío de la difunta.

El día 15 de febrero de 1787 en México, sacramentaron al señor coronel don Francisco Crespo, corregidor de la Nobilísima Ciudad, y este mismo día amaneció con fiebre la señora virreina viuda doña Felicitas Saint-Maxent, por lo que la sangraron.

El día 17 de febrero, a las cuatro de la tarde, sacramentaron a la condesa de Gálvez que estaba casi demente; le ministró el viático el señor deán y asistió el señor arzobispo don Alonso Núñez de Haro.

El día 18 de febrero de 1787 en México, se publicó un edicto del señor arzobispo en todas las iglesias, otorgando dispensa para que en Cuaresma se pueda comer carne durante cinco días, excepto los viernes y sábados y el Domingo de Ramos, que serían de vigilia.

Los días 19 y 20 de este mes, en el corral de los gallos, hubo varios tapados, y fue lo que nunca se había visto que con los gallos hubo toros, siendo el administrador de esa plaza el señor don Nicolás de Armas.

El día 22 de febrero de 1787, a las dos de la tarde, murió el señor corregidor don Francisco Crespo, casado con doña Teresa Bataller, hija del señor oidor don Miguel Bataller. Dicho caballero era de la Orden de Santiago. El día 23 fiie su entierro en la casa de la Profesa, que estuvo muy bueno, con la asistencia de toda la nobleza, la oficialidad y tres compañías del Regimiento de la Corona que hicieron una descarga muy mala. Los dolientes fueron el regidor decano don José Angel Aguirre, que hacía de corregidor, y el alacalde de Primer Voto el señor conde de Regia.

El día 24 de febrero de 1787 en México, entró el Correo de España y trajo las noticias siguientes: Que murió el señor marqués de Croix que fue virrey de esta Nueva España, y murió de ochenta y siete años de edad, siendo capitán general de Valencia. Al señor don Fernando José Mangino le vino la Intendencia General; al señor don Francisco Fernández de Córdoba, la Superintendencia de la Real Casa de Moneda; al señor don Francisco Javier Ignacio de Maldonado, que pasara a la Contratación de Indias en Cádiz. A los señores director del Tabaco don Felipe del Fierro y a don José Larriba, les vino los honores de oidores.

i

*Carzo de 1787*

El día 3 de este mes en México, salió la tropa de forzados para Manila, y salió para Antequera y valle de Oaxaca, de contador de la Factoría de Tabaco, don Benito Cuéllar, paje del finado virrey conde de Gálvez. Y este mismo día, se remató el Real Coliseo en almoneda pública por don Manuel Lozano a don Juan de San Vicente, en 8 125 pesos.

El día 5 de marzo de 1787, salió de México para Veracruz, y de allí para España, la sobrina del señor arzobispo doña Mariana de Haro y Peralta, con su esposo don Joaquín Chacón y toda su familia, en lunes por la mañana.

El día 7 de marzo de 1787 en México, fue el primero en que salió a la calle doña Felicitas Saint-Maxent, desde de la muerte de su marido él virrey conde de Gálvez, y fue al Santuario de Nuestra Señora de los Angeles con sus dos hermanas y sus hijos en miércoles, día de Santo Tomás de Aquino, y cuando salió de Palacio la guardia le tocó marcha y presentó sus armas con su piquete y bastidores como si viviera el señor virrey.

El día 12 de marzo de 1787 en México, en el Real Palacio, tomó posesión de su empleo en la Aduana el paje del señor virrey conde de Gálvez, don José Cerendieta. Y este mismo día se comenzó la almoneda de los bienes del señor virrey conde de Gálvez, en lunes. Fueron sus albaceas don Francisco Cabezón y don Juan Yelmo.

El día 15 de marzo de 1787 en el Real Palacio, sacramentaron a la hermana de la señora virreina, doña Victoria Saint-Maxent, y vino su Divina Majestad en secreto y en la estufa grande de Palacio entró por la puerta chica y subió por la escalera de palo. Trajo.a su Divina Majestad el tercer cura don N. Taglc, en jueves.

El día 16 de marzo de 1787 en México, se repicó por aviso de España, y al siguiente día fue la misa de gracias. En este aviso vino la noticia de que el señor fiscal del Crimen don José Pablo Valiente y Bravo, que se hallaba en La Habana en diligencias del real servicio, quedara allí de intendente de Ejércitos con el sueldo de 12 000 pesos, y que su mujer y familia que se hallaban en México, se transportasen a La Habana por cuenta de la Real Hacienda. El mismo día 16, sacaron de la cárcel de la Acordada tres hombres para ajusticiarlos, uno ahorcado y dos al garrote. El último era tullido, cuya enfermedad contrajo en la cárcel, donde llevaba catorce años de prisión. Sacaron también a la vergüenza a dos muchachos negros de quince años de edad, y sentenciados a diez años de presidio, y si se huían pena de muerte. Los ajusticiados fueron los primeros que se enterraron en el camposanto de la parroquia de la Santa Veracruz, en día viernes de la Samaritana.

El día 18 de marzo de 1787 en México, se dieron las manos el señor regente pasado don Vicente de Herrera y doña María Dolores de Terreros, y verificó este acto el señor arzobispo don Alonso Núñez de Haro, en domingo.

El día 19 de marzo de 1787 en México, a las cuatro de la tarde, murió el señor alcalde de Corte don Félix del Rey, y el día 20 en la tarde fue su entierro en el convento de San Agustín. Asistió la Real Audiencia gobernadora y con tal motivo la Compañía de Alabarderos y mía compañía de dragones del Regimiento de España. Asistieron también por convite las parcialidades de indios de San Juan y Santiago. El mismo día 19 en la tarde, hubo un huracán de viento y polvo que no se veían las calles, y el día 23 repitió. El día 28 del mismo, a las once y cuarto, hubo un temblor de tierra que duró cinco minutos, y en el resto del día y la noche repitió como diez veces, de suerte que se quebraron algunas partes del Real Palacio, el cañón de la Diputación y otras varias casas de México. La señora virreina viuda del señor conde de Gáivez, que se hallaba en Palacio, se bajó por el jardín. La mayoría de los habitantes de esta ciudad se fueron al Santuario de Nuestra Señora de Guadalupe y otros al Calvario, y los más de los principales se fueron a dormir al Paseo Nuevo, a la Alameda y pueblos aledaños. En fin, Ríe día del juicio y de confusión; unos rezaban, otros alababan, los más lloraban, otros corrían, otros se caían y a muchas mujeres dolíales el corazón.

El día 29 de marzo de 1787 en México, a las seis y media de la tarde, murió el señor conde de la Torre don Juan González de Cossío, coronel del Regimiento de Milicias en Toluca. El día 31 del mismo se enterró en el convento del Carmen.

El día 30 de marzo de 1787 en México, a las once menos cuarto de la noche, tembló, y en el resto de la noche repitió dos veces.

*QÍÍril de 1787*

El día 3 de este mes en México, a las nueve y treinta y cinco minutos, hubo un temblor de tierra muy razonable y repitió. Y este mismo día en México, se pasó a depositar en la iglesia del Hospital Real al Santísimo Sacramento de la iglesia de San Juan de Letrán, porque el colegio con las temblores estaba amenazando ruina, y los colegiales se pasaron del Puente del Espíritu Santo, a la casa del difunto don Miguel de Lugo, que estaba vacía.

El día 7 de abril de 1787 en México, en la salida para Catedral por ser Sábado de Gloria, salieron solamente el regente don Eusebio Pareja, el señor oidor don Miguel Bataller, y el alcalde de Corte don Modesto Salcedo, y salieron cuatro señores oidores y el regente.

El día 8 de abril de 1787 en México, a las cuatro de la mañana, hubo un temblor muy recio, de suerte que se han resentido todos los edificios de esta ciudad. Y este mismo día fue el primero de Pascua de Resurrección, y por haber temblado se mandaron suspender las comedias que debían comenzar, hasta nueva orden de la Real Audiencia.

El día 10 de abril en México, en la iglesia de la parroquia de San Miguel, llevó el alcalde de barrio don Matías de Herrera, una patrulla de granaderos del Regimiento de la Corona, para que hicieran preso a un retraído que decían que en dicho templo estaba matando una vaca, lo que fue falso, pues sólo hallaron con aquel unas ollas de tepache. Lo cierto es que durante el forcejeo, el retraído y los granaderos se hicieron de palabras, a tal grado, que dicho alacalde mandó a los soldados que dispararan sus fusiles, matando al infeliz referido que se llamaba Luis de Ortega.

El día 12 de abril de 1787 en México, trajeron preso a la cárcel de Abajo, al alcalde de cuartel don Matías de Herrera, por la muerte del retraído en la iglesia de San Miguel.

El día 13 de abril de 1787 en México, amaneció fijado en la Catedral el texto de excomunión del alcalde don Matías de Herrera, que a la letra dice lo siguiente: “Tengan por público excomulgado al alcalde de Cuartel don Matías de Herrera, por haber mandado matar en sagrado a Luis de Ortega”.

Y este mismo día en México, se empezó una novena en la Casa Profesa al señor San José, por los temblores que ha habido en esta ciudad y en todo el reino. Hubo misa, letanía y su Divina Majestad patente, a la que asistieron la Real Audiencia gobernadora, la Nobilísima Ciudad y demás tribunales, en viernes.

El día 14 de abril de 1787 en México, en la puerta de la cárcel de Abajo, a las cuatro y cuarto de la tarde, se le alzó la excomunión al alcalde de Cuartel don Matías de Herrera, por el señor cura de la parroquia de San Miguel don Bartolomé Sandoval, y lo volvieron a meter en la cárcel hasta que finalice la causa que se le está siguiendo.

El día 15 de abril de 1787 en México, salió de la iglesia de la Profesa una procesión de rogación con el santo patriarca Señor San José, para que se aplacaran los repetidos temblores de esta ciudad. Asistieron a esta procesión con vela en mano, la Real Audiencia gobernadora, todos los demás tribunales y la mayor parte de los vecinos más distinguidos de México, acompañados por la Guardia de los Alabarderos y una compañía de dragones del Regimiento de España, en domingo.

El día 16 de abril de 1787 en México, a la una menos cuarto de la noche, hubo un temblor de tierra muy recio.

El día 17 de abril de 1787 en México, sacaron de la cárcel de la Acordada 30 hombres para darles sus azotes por varios delitos, y sucedió que al pasar éstos por la esquina de Provincia, salió del Sagrario de la Catedral el Santísimo, y el cochero corrió y se metió en medio de los reos y comenzó a decir que le valía la iglesia, por lo que se juntó mucha gente y pudo haber habido un tumulto.

El día 18 de abril de 1787 en México, salió la cuerda de presidiarios de las tres cárceles, y fueron como 400 hombres. Y este mismo día, se publicó un bando por la Real Audiencia gobernadora ordenando que durante el tiempo que se reparara la ciudad que estaba toda maltratada a causa de los temblores, no anduvieran los coches sino muy despacio y sólo con dos muías. Y los que salieran fuera de la ciudad, saquen las demás muías a las garitas por donde vayan parando los coches. Pero los cocheros lo están haciendo al revés, porque el que no corría antes, después del bando corre más. Lo que se debió haber hecho en esta ciudad es lo que hizo el gobernador de Puebla, que mandó que no saliera ningún coche a la calle, ni aun el de él mismo, para dar ejemplo. Dicho gobernador se llama don Manuel de Flon.

El día 21 de abril de 1787 en México, se acabó la novena que hizo en la Profesa la Nobilísima Ciudad, por los temblores que han causado gran conflicto y destrucción en todo el reino, particularmente en la ciudad de Oaxaca, que casi se destruyó toda.

El día 23 de abril de 1787 en la mañana, salió de México a Veracruz, y de allí para España al Consejo de Indias, el señor don Vicente de Herrera y Rivero con su señora esposa doña María de los Dolores Terreros, hija del conde de Regla. Dicho caballero había sido regente de la Audiencia y capitán general de Nueva España por muerte del virrey don Matías de Gálvez.

El día 25 de abril de 1787 en México, la Real Audiencia confirmó el nombramiento de secretario de la Real Lotería en la persona de don José Mariano Villaseca.

El día 27 de abril de 1787 en México, en el Real Palacio, se acabó la obra del corredor que va por la Guardia de Alabarderos hacia las piezas interiores que se hicieron nuevas.

El día 28 de abril de 1787 en México, entró el Correo de España y trajo el nombramiento de superintendente general de la Real Hacienda al señor don Fernando José Mangino. Y este mismo día, fue el capítulo de los padres agustinos y salió electo de provincial el padre fray Tomás Mercado.

El día 30 de abril de 1787 en México, pusieron una guardia que le correspondía al señor Mangino por sus empleos, con 18 soldados, un oficial y un tambor del Regimiento de la Corona. Pero parece que este señor no quiso más que 9 y un cabo. Y este día, fue la misa de gracias por la salud del rey y por el aviso que vino de España.

0 *y) (ayo de 1787*

El día 6 de este mes en México, entró un extraordinario de Veracruz con un pliego para la señora virreina Felicitas Saint-Maxent, en que se le decía que por orden del señor ministro don José de Gálvez, venía de virrey sucesor de su difunto marido el señor don Manuel Antonio Flórez, y que a ella se le librarían para su transporte a España 30 000 pesos, y una vez ahí, 2 050 pesos; que a su hijo el niño Miguelito le otorgaban la encomienda de Bolaños en la Orden de Calatrava, a la niña María Guadalupe 200 pesos y a la niña Matilde 300.

Diario de sucesos de México • 175

El día 7 de mayo de 1787 en México, entraron los cajones con los pliegos del rey, y en esta correspondencia vino entre otras noticias la de haber sido nombrado virrey interino el señor arzobispo don Alonso Núñez de Haro; siendo así que ya había sido designado el señor don Manuel Antonio Flórez. También vino la noticia de que el señor don Antonio de Villaurrutia iba de regente a Guadalajara. Y este mismo día en el Real Palacio, en la sala de besamanos, hizo su juramento de intendente el señor don Fernando José Mangino, ante el regente y los señores oidores de la Real Audiencia gobernadora.

Gobierno del virrey interino
don Alonso Núñez de Haro,
arzobispo de México

El día 8 de mayo de 1787 en México, tomó posesión de virrey y capitán general interino el señor arzobispo don Alonso Núñez de Flaro; la Real Audiencia le entregó el bastón de mando en el remate de la escalera de los corredores del Real Palacio, y desde allí fue al real acuerdo donde se le dio posesión. Luego regresó a su Palacio Arzobispal donde recibió los parabienes, y fue en martes.

Nota

El día 6 de mayo murió en la ciudad de México el señor canónigo con la dignidad de chantre, don Félix Venancio Malo, que había sido oidor. El día 8 fue su entierro.

El día 9 de mayo de 1787 en México, fue la misa de gracias por el aviso de España y fue la primera a la que asistió el señor arzobispo en su carácter de virrey.

El día 10 de mayo de 1787 en México, firmó el señor arzobispo virrey el primer memorial de cama, y fue para una hermana del señor canónigo don Gregorio Omaña.

Nota

El día 8 de mayo el señor arzobispo virrey, pasó a su voluntad la Guardia de
Alabarderos a su Palacio Arzobispal, y regaló al alférez de dicha corporación
don Juan Alberto Badamés, una caja de oro con polvos, y dio de propina a [[16]](#footnote-16)

.'(O

DIARIO

f¡■ 1

5V)

; '?7/y

V'

craxoM

DE MÉXICO,

DE t í DE ACOSTO DE 1776, A 76 DE JOMO DE 1796.

fílS

*DON JOSÉ GOME/,,*

• tw* rr

La ' C\ a ■ CA ^ .v » sí c>

^ ^ g ?

? > s^ ^ 1~

¡&t ^

Y*8 I

?N «r

1. ^ r» ^a
2. * S'

1 f,< b ■*

s jR*

^ I * - a ^ §v | t ^ í g-

^ V • y 3 ^

K v ** fc<¿*£: §

id 11

5

¡M

y

£7)'// c JitnnJícente Je t/uc/ne.i, JJirletv JcífiiJílla''.

tJícrCiLutae. ? SJe/uitycr/JiJe JeM]w//a (/r./eJa.Jtlmw i- tV-

ñerCjcrrítaríal JeLu{{tl¡uyí$t/iivii'r.<d\‘i),’in/Áv‘,r. ij/tinrnv/áX a S i i.

laf/era l 'omeilJildorJtíhñn JeSlíart.v enh t \Jen ,/• f \Jah,¡r.i. L/i'iitif/tt'inprt Je l amura Je i\¿~7t.,w/ eavmWa.‘/niren/r (/enera/ jjgj Je sur Jacalea l(.rt rifad/\hvy,(/en<rmttjnr. v(a/'itan(¿enera/Je , j*j' c í/iei’ii lLs/.Caíta¿¿ejiJente Je.w/¿ea/^JnJieih ia. . fii/vrth/enJe:t/e l&j L/enera/Su/Je/e^aJa Je/aJ^ea/J/tatienJa/Jí’h.u.J Junrne. i ' \a .$¡ nía Je/Oahtco. *SJ/,* z ConJervaJorJeéj/f.¿fie.’¡Jenfe Je su i /!:;//,t (

y >■ fidelelc/adc (¿enera/Je í arrea} en elrriMin\(A ,•/ //, ■

I *" i/arii uvtmfi i'J yuril con/rxif'j $*teo Je *hmoho* endito

\cn c/ cTneex¿\/c\ti'iÚ7¿atfYtinJ*ic<tot<r^.Q/ou'zo Jo csrt A’/\i/r/eit¿o Jo- ?|

Iuida eon n¿7!My£*''t&trrua-p.ii/uuíícssflJrr c/fpr/do Je /¿/u///.}r,z > I i -y *t 'r¡- ¿ r/endo/i 11 ,/itr cO/hx/í/ío ayut//t c/rret* //. *'■ur/ía** ,y>/( ¿i2sJc>fui**nt\Ktu\* l?/¿*7/i¿rsnx* aA'rrryr/Li/nJv JúiJ Jj Jt’c ha /Vana a kur<ut)/ríertjrnhv a^itel/4Ajo fw’uj//rWoroto Je/ ////¿r/aJovw/ o/J./tt- rjj too e*£.ctt/Wtíjt yn’/íot coxdtintLf tt>Jx'/v fíc/ares Je Jefa JeAtoaJtw/r o,t

I *rtvionej.^ue tvt-i&rorjJtiri** 4

rss/tXtt yu

i&i'tcúllo. Jo^y/Wf/i/ue cX /yy/.

Cr¿s.f. .'.r~K**5¡-

¡Averna

(b

rfiuo M h*¡*« <w Ptóda im *«*w am. * i. x«ión. uu». w.

T

7

*fíl.ri/ir.Si.D.’Jíyui/*’ »/•’ A'.UI \.1, mi.'/,>,•//. I.trijmr I'II¡7¡-7j.jíh' ¡in\'tj *,hl\ttu*/¡>//<■ *7-Ü/l, lufhi 710(te.Abril*,*leh’kto:ntmi,* >,•//

los alabarderos noventa pesos, es decir, doce para el alférez, seis a cada cabo que son tres, y tres pesos al resto de los veinte soldados.

Los días 10 y 11 de mayo de 1787 en México, fueron las honraS fúnebres del señor virrey conde de Gálvez en la Santa Iglesia Catedral. Ofició la misa de pontifical como arzobispo, don Alonso Núñez de Haro y Peralta. El día 11, el cuerpo del difunto virrey fue trasladado de Catedral al convento de San Fernando, donde lo depositaron en su panteón parado a diferencia de los demás virreyes que los ponían tendidos. Acompañaron al cuerpo todos sus dependientes y familiares, los religiosos de San Hipólito y San Fernando y muchos tribunales y personas distinguidas con velas en mano. Esa noche que llovió mucho, asistieron al acto la Compañía de Alabarderos, el Regimiento de Dragones de España y la tropa de granaderos que llevaron sus armas a la fiinerala.

El día 12 de mayo de 1787 en México, en la Santa Iglesia Catedral, se celebró una misa de gracias donde cantóse el te deum por el ascenso del señor arzobispo a virrey de este reino. Dicho señor asistió como arzobispo a esta misa y no como virrey, y subió al coro acompañado del alférez y cuatro alabarderos. Y este día se publicó el bando de las intendencias, que fue el primero que decretó como virrey el señor arzobispo don Alonso Núñez de Haro.

El día 16 de mayo de 1787 en México, en Palacio en el real acuerdo, tomaron posesión como oidor honorario el señor don Felipe del Fierro, director del Tabaco, y de alcalde de Corte, el señor don Luis Chávez de Mendoza, oidor de la Real Audiencia de Santo Domingo. Y este mismo día tomó posesión de corregidor en la Sala de Cabildo el señor don Fernando José Mangino.

El día 18 de mayo de 1787 en México, se hicieron en la Catedral las honras fúnebres del señor canónigo chantre don Félix Venancio Malo, por ser día de su santo.

El día 19 de mayo de 1787 en México, en el Palacio Arzobispal, hicieron su juramento ante el señor arzobispo virrey, de superintendente de la Casa de Moneda, don Francisco Fernández de Córdoba, y el capitán don Fernando de Córdoba, de secretario del Virreinato. Presidió el juramento el señor secretario de Gobierno don Juan Martínez de Soria, y fue en sábado.

El día 21 de mayo de 1787 en México, tomó posesión de la Real Casa de Moneda el señor don Francisco Fernández de Córdoba, y se la dio el señor superintendente don Fernando José Mangino. Posteriormente el señor

Diario de sucesos de México • 177

Fernández de Córdoba se presentó ante el señor virrey arzobispo con todos los dependientes de la Casa de Moneda, en lunes.

El día 24 de mayo de 1787, en la Sala de Cabildo de la Diputación, tomo posesión de teniente de corregidor y asesor del señor don Fernando José Mangino, el licenciado don... Calado. Y este día a las diez de la noche, pasó la señora viuda del virrey conde de Gálvez al convento de San Femando, a visitar el panteón donde estaba su marido, y todo se le fue en llorar hasta que se desmayó, y ahí permaneció hasta las once de la misma noche.

El día 25 de mayo de 1787, salió de esta capital para España la señora virreina viuda doña Felicitas Saint-Maxent, con sus cuatro hijos: la primera de éstos se llamaba Adelaida, y era del primer marido, y los otros tres que tuvo con el señor conde de Gálvez: Matilde, Miguel y María de Guadalupe.

El día 31 de mayo de 1787 en México, asistió el señor arzobispo como virrey a la Universidad, a la visita que se hace cada vez que entra un nuevo virrey. Quien dijo la arenga fue el señor don Manuel de Cisneros, canónigo de la Santa Iglesia Catedral, y se adornó toda la Universidad desde la puerta, de tapices y candiles de plata, y de tarjetas de versos latinos y castellanos; de suerte que desde que se instaló esta institución no se había viso tanto adorno, ni más especial refresco, siendo rector el doctor don Francisco Beye de Cisneros.

unió de 1787

El día 1Q de este mes en México, en el Palacio Arzobispal, hizo el señor arzobispo órdenes de menores, y el día 2 las mayores en su oratorio. De suerte que estos ordenamientos son los primeros que ha hecho este señor siendo virrey.

El día 5 de junio de 1787 en México, por estar componiéndose la cárcel de Corte, mudaron los presos a la cárcel de Abajo, en martes.

El día 7 de junio de 1787 en México, fue día de Corpus, y salió el señor arzobispo en la procesión como virrey con la Real Audiencia y con bastón, lo cual, desde la época del señor Vizarrón hasta hoy, no se había vuelto a ver.

El día 8 de junio de 1787 en México, en el convento de San Agustín, comenzó sus funciones como capellán de los alabarderos, don Miguel de Gálvez, al oficiar la misa de la Virgen de la Concepción en su capilla.

El día 9 de junio de 1787, sacaron de la cárcel de la Acordada dos mujeres y quince hombres, dándoles 200 azotes por varios delitos.

El día 14 de junio de 1787 en México, fue la octava de Corpus, y esta vez el señor don Alonso Núñez de Haro, que entró a la Catedral como arzobispo por la puerta que llaman de los canónigos, sacó la Custodia, y a la vuelta salió por el mismo lugar como virrey con su bastón de mando, acompañado por la caballería y el Regimiento de Alabarderos. La Real Audiencia y los demás tribunales salieron de Palacio y se volvieron al mismo.

El día 17 de junio de 1787, llegaron de Vcracruz a la ciudad de México los señores don Francisco Fernández de Córdoba, superintendente de la Casa de Moneda, y don Fernando de Córdoba, secretario del Virreinato, que venían de dicho puerto a donde habían ido a acompañar a la señora virreina viuda doña Felicitas Saint-Maixent, que partió a España el día 9 en el navio El Astuto.

El día 21 de junio de 1787 en México, murió don Pablo Riondo, y se enterró en el convento de San Agustín. Dicho individuo era joven y tenía conveniencia en la Fábrica del Tabaco. Y este mismo día a las dos de la tarde, hubo un temblor de tierra, y dicen que en la mañana hubo otro que pocos sintieron.

El día 23 de junio de 1787, en el Real Palacio se estrenó un cepo para la Guardia de los Alabarderos, y el primero que lo ocupó fue don Andrés Fuentes.

El día 24 de junio de 1787 en México, en el Palacio Arzobispal, ante los señores arzobispo, deán y arcedeán, se hizo la rifa de 4 000 pesos que dejó de dote para una monja el señor arzobispo Vizarrón, y le tocó la suerte a una niña llamada doña María Josefa Calderón y Morales, del convento de'la Concepción. Se hizo esta rifa el día de San Juaa, como debía ser según cláusula testamentaria. A este acto asistió el señor don Manuel de Flores, secretario de la Mitra.

%

ulio de 1787

El día 1Q de este mes en México, en el convento de Santa Teresa la Nueva, se bendijo por su capellán el padre don José Velasco, el estandarte de los gremios de tocineros, panaderos y curtidores, que antes estaban divididos en tres compañías; la bendición fue en domingo.

Diario de sucesos de México • 179

El día 10 de julio de 1787 en México, en el Palacio Arzobispal, consagró el señor arzobispo una custodia que regaló el señor don Luis de Torres, arcediano de la Catedral, al convento de las monjas capuchinas del Santuario de Nuestra Señora de Guadalupe. Y este día entró en México a las seis y media de la tarde, el correo de España, pero no trajo cosa particular.

El día 12 de este mes fue la misa de gracias, a la que asistió el señor arzobispo como virrey.

Ei día 14 de julio entró el Correo de España, y en éste le vino el gobierno del Nuevo Santander al señor coronel don Melchor Vidal de Lorza, y el día 16 fue la misa de gracias a la que no asistió el señor arzobispo virrey.

El día 21 de julio de 1787 en México, por un extraordinario de Vera- cruz se supo haber llegado a aquel puerto el nuevo virrey don Manuel Antonio Flórez, con 56 días de navegación. Desembarcó el día 18.

El día 25 de julio'de 1787 en México, me quedé yo, José Gómez, solo en el Real Palacio todo el día, porque los compañeros, unos estaban en la fiesta del Señor San Diego en San Francisco, y otros de guardia en el Arzobispado con el señor virrey interino el señor arzobispo don Alonso Núñez de Haro y Peralta.

El día 29 de julio de 1787 en México, en el convento de San Lorenzo, profesó de monja doña María Guadalupe Mateos, mujer de don José Mateos, su primo hermano, de quien estaba divorciada.

El día 1° de este mes en México, en la sala del real acuerdo en Palacio, tomó posesión de oidor honorario el señor don José Larriba, que era director general del Tabaco, y se la dio el señor regente don Eusebio Sánchez Pareja, porque no asistió el señor virrey interino que lo era el arzobispo don Alonso Núñez de Haro, y fue en miércoles.

El día 3 de agosto de 1787, entró a México la mayor parte del equipaje del señor virrey don Manuel Antonio Flórez y veinticinco personas de su familia.

El día 14 de agosto de 1787 en México, pasó la Real Audiencia al Palacio Arzobispal a despedirse del señor arzobispo virrey don Alonso Núñez de Haro, y a poco rato correspondió éste a la visita en la Real Audiencia, la que

verificó en el mismo salón donde se reunía con ella, y retirándose a su palacio lo acompañaron los señores oidores hasta la escalera, y fue en martes.

Nota curiosa

El mismo día que se despidió el señor don Alonso Núñez de Haro de la Real Audiencia, hizo cuarenta años ni más ni menos que un día como este, se despidió también el señor arzobispo virrey don Juan.de Vizarrón, a quien lo sucedió el virrey duque de la Conquista.

Gobierno del virrey don Manuel Antonio de Flores

El día 16 de agosto de 1787, en el puebla de San Cristóbal Ecatepcc, a cinco leguas de México, entregó el bastón del Virreinato el señor arzobispo Núñez de Haro al señor don Antonio Flórez. Y este señor no quiso que vinieran los alabarderos desde San Cristóbal con alabardas al lado de su coche, sino que vinieran a caballo desde el pueblo de Nuestra Señora de Guadalupe con espada en mano. Es la primera vez que un virrey concede dicha gracia a este regimiento, del que era capitán don Mariano de Velasco, que no asistió por estar enfermo.

El día 17 de agosto, el señor virrey Flórez entró a México e hizo su juramento en el real acuerdo, y se leyeron mes cédulas que traía, una como virrey y gobernador, otra como capitán general y otra como presidente de la Real Audiencia. Se siguieron en celebridad de esta entrada tres comedias en el Coliseo, en viernes, sábado y domingo, organizadas por su administrador don Juan de San Vicente, y hubo loa e iluminación.

El día 21 de agosto en México, en el Real Palacio, vino el señor arzobispo don Alonso Núñez de Haro a visitar al señor virrey don Manuel Flórez, y se estuvieron en consulta encerrados, desde las diez de la mañana hasta las doce y media, y fue en martes.

Nota

Al señor arzobispo que acabó de virrey se le siguen haciendo los mismos honores que en el tiempo en que lo era.

Las primeras cartas que recibió el virrey don Manuel Antonio Flórez de España, desde que tomó posesión, frieron el día 30 de agosto del presente

181 •

año, por un extraordinario de Veracruz con la fatal noticia de la muerte del señor ministro del Consejo de Indias, don José de Gálvez, que falleció de repente en Madrid el día 17 de junio.

El día 31 de agosto de 1787, amanecieron en esta ciudad unos pasquines impresos con mil infamias, alegrándose de la muerte del referido ministro, y este día sacaron de la Acordada trece hombres dándoles 200 azotes por varios delitos, en viernes.

^^pticrnbre de 1787

El día 3 de este mes en la Sala del Real Acuerdo, ante el señor regente y oidores, hizo su juramento de ministro de capa y espada como consejero de Indias, el señor don Femando José Mangino, con antigüedad, y fue en lunes.

El día 4 de septiembre de 1787 en México, a las dos de la tarde, hubo un temblor de tierra muy severo, en martes. A la hora del temblor estaba cayendo un fuerte aguacero.

El día 10 de septiembre de 1787 en México, en Palacio ante el señor virrey, hizo su juramento de asesor de Intendencia y de teniente de Corregidor, el señor licenciado don José Ayala Matamoros, en lunes.

El día 12 de septiembre de 1787 en México, sacaron de la Acordada ocho hombres, dándoles 200 azotes por varios delitos. Y este día en que tomó posesión de asesor de Intendencia y de teniente de Corregidor el señor don José Ayala Matamoros, comenzó un pleito en la Real Audiencia entre panaderos y regidores, acerca de la adulteración del peso del pan, interviniendo como abogados de la causa los licenciados Palomino y Lebrón.

El día 22 de septiembre de 1787 en México, sacaron de la Acordada siete hombres para ajusticiarlos, cuatro con la horca y tres con garrote. Uno de éstos file quemado por su pecado bestial con una burra, a la que mataron y quemaron también. Para estos ajusticiados se imprimieron unas exhortativas a las comunidades para que los encomendasen a Dios.

El día 26 de septiembre de 1787 en México, sacaron de las iglesias de San Miguel y de Santa Catarina, a los retraídos que había en ellas, y los remitieron por orden del rey a la cárcel pública, con arreglo a un bando que se publicó recientemente. Y este mismo día salió la cuerda de presidiarios de las tres cárceles.

(Octubre de 1787

i

El día 6 de este mes en México, en el Real Palacio, se puso por orden del señor virrey en el Cuerpo de la Guardia de los Alabarderos, la mampara que está en la puerta de su antesala.

El día 9 de octubre de 1787 en México, en el convento de San Fernando, murió don José Colorado, abad del Santuario de Nuestra Señora de Guadalupe, donde fue enterrado al día siguiente.

El día 10 de octubre de 1787, en la Villa de Guadalupe, bendijo el señor arzobispo don Alonso Núñez de Haro la iglesia y convento nuevos de las monjas capuchinas.

El día 15 de octubre de 1787, salieron de México del convento de capuchinas nueve religiosas a Nuestra Señora de Guadalupe, para fundar su nuevo convento. Allá llegaron en coches escoltadas por dragones del Regimiento de España, a las nueve y media de la mañana, y entraron a su nueva iglesia acompañadas de sus madrinas, en punto de las diez. Hubo misa y te deum, y asistieron al acto el señor arzobispo y la mayor parte de la nobleza de México.

El día 17 de octubre de 1787 en México, murió el señor don José Go- rráez, secretario de Gobierno, y se enterró al día siguiente en la iglesia de San Diego. #

El día 20 de octubre de 1787 en México, llegó el correo de España y trajo certificada la noticia de la muerte del señor don José de Gálvez, ministro de Indias, y le vino concedido al sargento mayor del Comercio don Manuel Hermosa, el sueldo de mil pesos.

El día 22 de octubre de 1787, fue la misa de gracias y asistió el señor virrey. Y este día, murió repentinamente y sin sacramentos el señor doctor don Manuel Cisheros, canónigo doctoral de la Iglesia Catedral.

El día 24 de octubre de 1787 en México, se alborotaron los frailes de San Hipólito contra los del Espíritu Santo; y aunque son de una misma religión se dieron de palos e hirieron, por lo que fue la tropa de la Corona a sosegarlos, y el asunto se remitió a la Real Audiencia.

Diario de sucesos de México • 183

oviembre de 1787

El día 4 de este mes, en el Cuerpo de Guardia de Alabarderos, se me dio a conocer a mí, José Gómez, como cabo de Escuadra de esta compañía, siendo capitán de ella don Mariano de Velasco, y alférez don Juan Alberto Badamés.

El día 5 de noviembre de 1787 en México, en el Real Palacio, monté yo, José Gómez, desde que tengo en la plaza de alabardero, hace dieciséis años dos meses y cuatro días, la primera guardia como cabo de este regimiento.

El día 7 de noviembre de 1787 en México, a las siete y media de la mañana, tuvimos un temblor de tierra muy fuerte que duró cinco minutos, en miércoles.

El día 8 del mismo mes de noviembre de 1787 en México, a las diez y veinticinco minutos de la mañana, volvió a temblar.

El día 11 de noviembre de 1787 en México, en el convento de Santo Domingo, se hizo la fiesta de los asturianos a Nuestra Señora de Covadonga, y predicó el rector del Colegio de Porta Coeli, a quien se le fue el sermón, de forma que ya no pudo continuar, cosa que dejó a los oyentes bien confundidos.

El día 12 de noviembre de 1787 en México, día de San Diego, asistieron los tribunales a la Catedral a la misa de gracias, por ser día del príncipe de Asturias que cumplió 39 años, pero no asistió el virrey ni al paseo ni a la comedia.

El día 16 de noviembre de 1787 en México, prest^ juramento de secretario de Gobierno el señor conde del Valle de Orizaba, y al día siguiente tomó posesión de regidor propietario de esta ciudad, el señor marqués de Uluapa.

El día 17 de este mes en México, se publicó un bando del señor virrey prohibiendo que el día 19 en que comenzaran las corridas de toros en su honor, se hiciera otra en la noche. Pero las que se llevaron a efecto ese día, en la mañana y en la tarde, estuvieron tan malas que fueron indignas de esta Corte.

El día 20 del mismo, fiie la segunda corrida de toros y éstos no estuvieron tan malos. El virrey sólo acudió en la tarde.

El día 21 fue la tercera corrida y los toros no estuvieron malos. El virrey asistió en la tarde. Y este día en la noche a la hora de la oración, en el Portal de los Mercaderes, hubo una desgracia en que se cayeron y se murieron dos cajoneros.

El día 22 fue la cuarta corrida, y los toros estuvieron medio razonables.

El día 26 de noviembre de 1787, fue la segunda semana de toros, y no asistió el señor virrey por estar despachando su correspondencia a España. En la tarde hubo una desgracia y fue, que en la plaza de toros, uno de estos ensartó gravemente a un torero gachupín, metiéndole el asta por entre las dos vías.

El día 27 del mismo, fue el segundo día de toros de la segunda semana, y estos estuvieron muy malos. Mejor se fue el virrey de paseo a la Piedad.

El día 28 de noviembre los toros estuvieron muy buenos, hubo cucaña o monte parnaso, y en la tarde asistió el virrey, que vio cómo un toro le dio a un pobre hombre y lo dejó como muerto.

El día 29 del mismo, fue el último de toros de la última semana, y no asistió en la mañana el señor virrey, pero en la tarde sí. Y este día Tomás Ve- negas, al matar el primer toro, fue herido de gravedad en la ingle. '

t

Nota

En toda esta temporada de toros hubo su novedad, y fue que no asistieron el Cabildo de Nuestra Señora de Guadalupe, ni la Universidad, ni el Colegio de Santos, ni el Protomedicato ni el Tribunal de Minería.

^Diciembre de 1787

El día 2 de este mes en México, en la Santa Iglesia Catedral, se hizo la publicación de bulas, las cuales se tasaron a dos reales, y asistió el señor virrey. La publicación no entró por la Puerta del Perdón, pues estaban haciendo la portada y la torre.

El día 15 de diciembre de 1787 en México, sacaron de la Acordada 23 hombres, dándoles 200 azotes por varios delitos.

El día 16 de diciembre de 1787 en México, a la una de la noche, entró el Correo de España y por él se supo de la muerte de la señora virreina viuda de don Matías de Gálvez. Y en éste le vino licencia al señor don Fernando José Mangino, para casarse con la hija del señor regente don Eusebio Sánchez Pareja, y al señor canónigo Campos, la maestría de Escuelas, y al señor licenciado Bechi, media ración.

El día 19 de diciembre de 1787 en México, entró el Correo de Acapulco con la noticia de quedar amarrada en ese puerto la nao de China.

Diario de sucesos de México • 185

El día 24 de diciembre de 1787, se estrenó la cárcel de Corte con su capilla y todos sus oficios.

El día 29 de diciembre de 1787 en México, en el Real Palacio, puse yo, José Gómez, en el cepo, a don Isidro Sarmiento por mandato de mi capitán, y fue el primero que puse preso después de que se me nombró cabo de Escuadra.

El día 1Q de este mes en México, salieron electos de alcaldes ordinarios el señor marqués de Uluapa y el capitán del Comercio don Tomás de Urizar.

El día 7 de enero de 1788, salió de México para Veracniz la Primera División del Regimiento de la Corona. Y este día salió de cónsul don Francisco Pesqueira.

El día 9 de enero de 1788, salió de México para Veracruz la Segunda División del Regimiento de la Corona.

El día 10 de enero de 1788, entró a México el Correo de España, y en éste vinieron aprobados los regimientos fijos y los nombramientos de coroneles al mayor de uno de ellos, don Pedro Garibay, y a don Pedro Basco. Y este día se remató la plaza de toros por dos semanas en 15 000 pesos libres para el rey, y se relevó la guardia en el Real Palacio con dragones de España, por haber salido a Veracruz el Regimiento de la Corona.

El día 11 de enero de 1788, salió de esta capital para el puerto de Veracruz, la Tercera División del Regimiento de la Corona. Y este día, a las nueve y media de la noche, en una casa de la calle de Manrique, se ocultó un muchacho de 22 años llamado José Cotilla, debajo de la cama de la señora N. Martínez, que vivía en compañía de otras tres mujeres. Luego que este muchacho se dejó ver, las dichas mujeres comenzaron a dar de gritos, por lo que aquél armado con un cuchillo atacó a las cuatro, escapándose de morir sólo una. Pero con el alboroto que se hizo, y pasando casualmente el soldado alabardero Tunvera, prendió al homicida y lo condujo a la cárcel de Corte.

El día 13 de enero de 1788 en México, en la iglesia de Jesús María, se hizo la fiesta del Niño Perdido y no asistió el señor virrey en la mañana, pero en la tarde sí. Y este día, salió de esta capital para el puerto de Veracruz, la Cuarta y última División del Regimiento de la Corona. [[17]](#footnote-17)

El día 15 de enero de 1788, en la Sala del Crimen, se vio la causa del homicida José Cotilla, y se le condenó a la pena ordinaria de muerte. El día 18 lo ahorcaron en la Plaza Pública, y después de muerto le cortaron sus manos; una de ellas se clavó en la picota que se puso en medio de la horca, y la otra en la casa donde ejecutó los homicidios. Finalmente su cuerpo lúe enterrado en la parroquia de la Santa Veracruz.

El día 17 de enero de 1788 en México, cayó la ronda de la Acqrdada en tres vinaterías de tres hermanos llamados los Maldonados, y diciendo que era chinguirito los embargaron y les derramaron el aguardiente, llevándose a los cajoneros presos. Por lo que el Tribunal del Consulado metió la mano y se presentó al señor virrey, quien ordenó que el marqués de Uluapa, alcalde de Primer Voto, pasara a la Acordada a tomarles declaración a los cajoneros, cosa que fue muy sensible al capitán de este tribunal, don Manuel de Santa María.

El mismo día 18 de este mes, se repitió en el Coliseo muchas veces la comedia de Marta la remolantina, y en la segunda jomada se prendió Riego en una columna de las que había de perspectiva, y se alborotó toda la gente, de forma que salió todo mundo, pero no hubo desgracia alguna.

El día 20 de enero de 1788 en México, se celebraron los años de nuestro católico monarca y asistió el señor virrey a la misa y a la comedia, pero no hubo artillería porque los que la ejecutaban habían salido a Veracruz.

El día 21 de enero de 1788 en México, empezaron los toros de las dos semanas, mismos que estuvieron muy malos. Don Ignacio Castera rematador de la plaza, inventó correr en ella venados y perros y echó también conejos chi- quititos, que de nada sirvieron, por lo que se compuso la décima siguiente:

El género de venados Que en la plaza ha de correr,

Sin duda que debe ser,

El de los hombres casados.

Y muchos enamorados Que a sus mujeres y damas

Las llevan a ver las tramas ,

Donde se enreda el venado,

Que quedará desollado,

Sin dinero y con escamas.

Diario de sucesos de México • 187

Y este mismo día, entraron a México seis compañías de dragones del Regimiento de México, que estaban en Puebla con todo el regimiento, y vinieron de relevo de los Dragones de España.

El día 22 de enero, file el segundo de toros que no estuvieron malos. No hubo ninguna desgracia y no asistió el virrey ni en la mañana, ni en la tarde, pues se fue de paseo.

El día 23 de enero de 1788, fue la tercera corrida de toros, y hubo venados con perros, liebres y conejos, que fueron una diversión bien fea, y en la tarde don Ignacio Castera dio de bofetadas y de palos a algunos de los toreros, cosa muy mal hecha y en público, que todos lo tuvieron a mal.

El día 24 en México fiie la cuarta corrida de toros, y echaron tres perros con un toro. De estos perros el mejor, llamado El León, que era del señor conde de Gálvez, fue muerto por el toro. El virrey no asistió ni en la mañana ni en la tarde.

El día 28 de enero de 1788, fue el primer día de toros de la segunda semana. Hubo carreras de moros y cristianos que estuvieron muy malas. El virrey asistió en la tarde.

El 29 de enero fue el segundo día de la segunda semana de toros. Hubo en la tarde algunas desgracias, pues a uno de a caballo le rompieron un brazo, y a otro de a pie le pasó lo mismo, además de otros dos revolcados.

El día 30 fue la tercera corrida de la segunda semana de toros, y no estuvieron tan malos. El único percance que hubo fue que a un torero le hizo pedazos el toro sus calzones.

El día 31 de enero de 1788, fue la cuarta y última corrida de toros, que no estuvieron tan malos, y no hubo ninguna desgracia. Durante todas estas corridas no asistió el señor virrey, salvo a la primera.

El día 3 de este mes en México, entró el Correo de España y trajo como novedad que el señor Gamboa viene de regente a esta Audiencia; que el oidor Urízar se va de regente a Santo Domingo; que al virrey le vino la superintendencia general de la Real Hacienda, y el señor Mangino se iría a España al Consejo de Indias.

Los días 4 y 5 de febrero, lunes y martes de carnestolendas, hubo dos tardes de toros muy malas en las que hubo mucho desorden, avisos y otras

cosas más, a las que no asistió el virrey, pues se fue de paseo. Quien mandó en la plaza fue el marqués de Uluapa, como primer alcalde, por falta del corregidor Mangino y de su teniente Matamoros.

El día 12 de febrero de 1788, en el reaf acuerdo, tomó posesión de oidor el alcalde de Corte don Manuel Salcedo, y no asistió el virrey.

El día 15 de febrero de 1788 en México, en el Real Palacio, fue la primera junta de la Intendencia, y asistió el señor virrey como superintendente general, en viernes.

El día 17 de febrero de 1788, se presentaron al virrey los oficiales de los tres regimientos fijos del reino con sus uniformes y divisas. Los uniformes de todos son blancos: la divisa de los de México es encarnada, la de Nueva España es verde, y la de Puebla morada, todos con botón dorado.

El día 27 de febrero de 1788, entró a México el Correo de España con la noticia de que las intendencias de Manila venían quitadas, y que según parece sucedería lo mismo con las de este reino; que al señor Valdés le sino ración entera. El día 28 fue la misa de gracias y no asistió el virrey.

i^jy)(arzo de 1788

El día 1Q de este mes en México, salieron los presidiarios para Manila, y sacaron de la cárcel de la Acordada tres reos para ajusticiarlos.

El día 12 de marzo del presente año, en la capilla del Real Palacio, fray Felipe de Jesús fue el primer betlemita que predicó ahí. Este religioso era habanero, del Morro.

El día 15 de marzo de 1788, salió de México el señor virrey don Manuel Antonio Flórez, para el pueblo de Coyoacán, a mudar de temperamento por hallarse un poco malo.

I

El día 16 de marzo, Domingo de Ramos, entró a México el Correo de España y no trajo cosa particular; la misa efe gracias fue hasta el 24, lunes de Pascua.

El día 22 de marzo de 1788, en la Catedral de México, se estrenó un pie de cirio pascual de plata que pesaba 800 marcos, y costó 18 000 pesos, siendo arzobispo el señor don Alonso Núñez de Hato. Y el día 20, Jueves Santo, se estrenó en el convento de San Agustín un trono de plata en que se depositó el Santísimo.

Diario de sucesos de México • 189

El día 27 de marzo de 1788, salió de Acapulco para Manila el navio

Señor San José.

QÍbril de 1788

El día 5 de este mes en México, hubo a las seis y media de la mañana un temblor de tierra muy razonable, y a poco repitió otro, no tan fuerte, en sábado.

El día 7 de abril de 1788, salió de México para Veracruz, y de allí a España el señor don Fernando fosé Mangino, con destino al Consejo de Indias.

El día 12 de abril de 1788, salió de México la cuerda de presidiarios de las tres cárceles, y en ésta partió también bajo partida de registro para España, el pobre de don Vicente Tomati, galán del Coliseo y a la presente barba.

El día 15 de abril de 1788 en México, amaneció muerto don José El Gato, comediante marido de la cantarína Felipa Mercado, y este mismo día fue enterrado en la tarde en el convento de San Francisco, al que asistieron todos los comediantes.

El día 27 de abril de 1788, entró a México el señor don Francisco Javier Gamboa, que venía de la isla de Santo Domingo para ser regente de esta Real Audiencia. Luego luego que llegó, pasó al pueblo de Coyoacán a presentarse al señor virrey don Manuel Antonio Flores.

El día 29 de abril de 1788, en Palacio en el real acuerdo, tomó posesión de regente el señor don Francisco Javier Gamboa, y no asistió el señor virrey por hallarse fuera de México, ni el oidor decano don Baltazar Ladrón de Guevara, por estar enfermo. Quien le dio posesión fue el subdecano don Simón de Mirafuentes.

Nota

Dicho señor Gamboa, es el cuarto regente que ha habido en esta Real Audiencia de México. El primero fue el señor don Francisco Romá y Rosell; el segundo el señor don Vicente de Herrera, y el tercero el señor don Eusebio Sánchez Pareja.

Q^Cayo de 1788

El día Io de este mes en México, en la Real Universidad, hubo una función muy clásica, en la que el médico don Martín Sesé hizo una arenga muy especial acerca del Jardín Botánico. A este acto asistió la Audiencia por hallarse el virrey ausente. Hubo mucha concurrencia de todas clases, y fue la primera asistencia del nuevo regente Gamboa, y hubo su etiqueta sobre quién debería tocar la campanilla; tanto, que se mandó una ordenanza al señor virrey para preguntarle, y éste mandó decir que la tocase el señor regente que estaba en su lugar. Para esta función se dispusieron tres árboles,de papayas muy buenos encohetados, que por haber llovido esa tarde, no se dispararon hasta las nueve de la noche, y no lucieron porque estaban mojados.

El día 2 de mayo de 1788 en México, en la casa de don Ignacio Castera, en el Paseo Nuevo, fue la primera tarde en que se juntaron para dar principio a los asuntos del Jardín Botánico, con su director don Martín Sesé.

El día 6 de mayo de 1788, entró a México el Correo de España, y en éste le vinieron los ascensos de chantre al señor Omaña, y de tesorero al señor Narro. También le vino en éste al señor arzobispo don Alonso Núñez de Haro, los honores de capitán general, por haber sido virrey sucesor del conde de Gálvez.

El día 7 de mayo de 1788 en México, murió doña Juana Páez, madre de doña Antonia San Martín, que era la última dama del Coliseo, y el 4la 8 fue enterrada en el Sagrario de la Catedral.

El día 9 de mayo de 1788 en México, murió don Diego Ortigosa, hermano del señor obispo de Oaxaca, y el día 10 del mismo se enterró en el convento de San Francisco con palma y corona. Asistió una compañía de granaderos del Comercio de que era capitán.

El día 10 del presente entró a México el correo atrasado de España, y no trajo cosa notable.

El día 13 en México, amaneció muerta doña Mariana Ruiz de Castañeda, mujer de don Mariano de Velasco, capitán de Alabarderos y hermano del conde de Santiago. El día 14 fue enterrada en el convento de San Francisco, y asistió la Compañía de Alabarderos de convite, sin armas. Fue sepultada en la sacristía en la bóveda de los condes de Santiago.

Diario de sucesos de México • 191

El dia 19 de mayo de 1788, salió de México para Veracruz y de allí para la isla de Santo Domingo, el señor oidor don José Urízar, que iba de regente.

El día 25 de mayo de 1788 en México, fue el Corpus de San Agustín, y convidaron los padres de esta orden a todas las cofradías que hay en su iglesia; y habiendo concurrido los escribanos y la Compañía de Alabarderos, hubo su etiqueta sobre los lugares, por lo que mandó el alférez de Alabarderos retirar la compañía porque no se les dio el lugar que les correspondía, pero no salieron. La etiqueta fue entre los escribanos que sacaban a San Juan Evangelista, y los alabarderos a Nuestra Señora de la Concepción.

unió de 1788

El día 2 de este mes volvió el señor virrey del pueblo de Coyoacán.

El día 10 de junio de 1788, se quitó su pelo el señor virrey y se puso birrete y peluquín, para recibir y salir a la calle. Y este día, sin aparato ni solemnidad, se hizo público el juicio de residencia del señor virrey conde de Gálvez, por cuarenta días, para que se presentaran al señor virrey don Manuel Antonio Flórez, aquellos que tuvieran que pedir.

Nota

Le pusieron al señor virrey dos pasquines que son los siguientes:

Señor Flores, peor es usted que sus antecesores.

- este otro:

El virrey es un mojón,

Sus providencias secretas,

Su persona necesaria,

- su gobierno de mierda.

El día 17 de junio de 1788 en México, se publicó el bando para que el señor virrey don Manuel Antonio Flórez firmara con estampilla, lo que hasta el día no se verifica.

El día 18 de junio de 1788 en México, en la noche, hubo un baile en el Coliseo para festejar a los hijos del señor virrey, a cuyo baile se entraba con boletos; tal festejo nunca se había visto, al cual sólo entraban las personas de distinción, pero hubo entre las señoras su etiqueta, por lo que no concurrieron las de primera clase, sino las de segunda, tercera, cuarta y quinta. Duró el mentado baile hasta las cuatro de la mañana, y fue siendo virrey el señor don Manuel Antonio Flórez y sus hijos don José, don Manuel y don Juan, y juez del Coliseo el señor oidor don Cosme de Mier, en miércoles.

El día 20 de junio de 1788, salieron de México dos hijos del señor virrey, esto es uno para Perote y el otro para Veracruz, y de ahí a España.

El día 24 de junio de 1788 en México, en el Real Coliseo, se hizo una función muy regia en obsequio de los días de la señora virreina doña Juana María Pereira, esposa el actual virrey, y se adornó todo el Coliseo con papel de colores, y se hizo la comedia de La Romera de Santiago, comedia nueva, y una pitipieza que se intituló Las burlas del sueño decente. Estuvo la función completa, y no asistió el señor virrey sino su hijo don José Flórez. La entrada fue doble de a seis reales.

El día 27 de junio de 1788 en México, hubo un temblor de tierra poco después de las dos de la tarde, y el día anterior cayó un aguacero muy grande

l

que duró toda la noche.

El día 29 de junio de 1788 en México' fue el capítulo del convento de San Hipólito, y salió de general el reverendo padre fray José Castro, como sucesor del reverendo padre fray José de la Peña, que lo había sido 32 años. Asistió al capítulo el señor arzobispo don Alonso Núñez de Haro, y Ríe día de San Pedro por la mañana.

El día 5 de este mes en México, hubo un intermedio de capítulo en el convento de San Francisco. Y este mismo día en el real acuerdo, tomó posesión de alcalde de Corte don Guillermo Antonio Aguirre y Viana, y quien le dio posesión fue el regente don Francisco Javier Gamboa; el virrey no asistió.

El día 6 de julio de 1788 en México, se pasó en procesión a Nuestra

Señora de las Angustias, del Hospital del Amor de Dios al Hospital de San Andrés, en domingo.

Diario de sucesos de México **193*

El día 19 de julio de 1788 en México, fue el sorteo de la Real Lotería, y desde este día asistió de juez el teniente de corregidor, don José Ayala Matamoros, como sucesor del oidor don Simón Antonio Mirafucntes.

El día 25 de julio de 1788 en México, entró el Correo de España, y en éste le vino al doctor Pereda ser inquisidor. Este padre se hallaba en el oratorio de San Felipe Neri y era el director de la Casa de Ejercicios. También vino en este correo la noticia de que el día 29 de marzo del presente año, nació el infante hijo del príncipe de Asturias, a quien se le pusieron los siguientes nombres: Carlos María, Isidro, Luis, Fernando, Ascensión, Atanasio de la Cruz, Gregorio, Pío, Juan, Miguel, Antonio, Máximo, Domingo, Nepomu- ceno, José, Pascual, Trinidad, Bernardino, Felipe, Germán, Ramón, Taraco, Marcelino, Quirino, Félix, Jacinto, Eleuterio, Severino, Florencio, Matías, Néstor, Cesáreo, Leandro y Santos Inocentes.

El día 28 de julio de 1788 en México, se cayó muerto don Francisco Rivera, coronel del Regimiento Urbano del Comercio de México, y el día 30 del mismo se sepultó en el convento de San Francisco en la capilla de Aranzazú; fue con la mayor pompa que se ha visto, marchó un batallón del Comercio y fueron junto al cuerpo cuatro coroneles.

El día 29 de julio de 1788 en México, se publicó con atabalillos el juicio de residencia del señor corregidor difunto don Francisco Crespo, y era el juez don Manuel Badamonte, coronel de Migueletes de la ciudad de Guadalajara, caballero de la Orden de Alcántara.

Otfgosto de 1788

El día l9 de este mes en México, sacaron de la Acordada dos hombres para ajusticiarlos, y les dieron garrote.

El día 2 de agosto de 1788 en México, murió el señor don Melchor de Peramás, secretario que había sido del Virreinato en tiempo del virrey Bucareli, y oidor honorario actual de la Real Audiencia. El día 4 fue su entierro en el convento de San Francisco, en el reservado de los señores Cervantes que está en la Sala de profundis, por estar casado con una hija de don José Cervantes.

El día 6 de agosto de 1788 en México, entró el Correo de España, y no trajo de particular más que el nombramiento de abad al señor canónigo Sopeña de la Colegiata de Nuestra Señora de Guadalupe. El día 8 de este mismo

fue la misa de gracias, y no asistió el señor virrey.

El día 10 de agosto de 1788 en México, murió don José Moreno, y el día 12 del mismo se enterró en la Tercera Orden de $an Francisco, con palma y corona. Este caballero fue alabardero 23 años.

El día 16 de agasto de 1788 en México, se publicó con atabalillos el paito de la señora princesa de Asturias para que por tres días se pongan las cortinas y luminarias en toda la ciudad. Los días 18,19 y 20, frieron estos tres días. El 19 fue la misa de gracias que ofició el señor arzobispo don Alonso Núñez de Haro de pontifical. A esta misa asistió el virrey, por la tarde al paseo y en la noche a la comedia que fue El maestro de Alejandro. Las otras dos comedias que se hicieron en estos días fueron: Tetmrcay El negro más prodigioso.

El día 27 de agosto de 1788 en México, en el real acuerdo, tomó posesión de oidor de esta Audiencia el señor don José de Moya, oidor decano que era de la de Guadalajara, y no asistió el señor virrey don Manuel Antonio Flórez, en miércoles. ,

El día 30 de agosto de 1788 en México, murió la señora doña María Felipa de Ayza, mujer que fue del señor ilustrísimo don Domingo Balcázar, oidor que fue de esta Real Audiencia, decano y camarista del rey. El día 31 en la tarde se sepultó en el oratorio de San Felipe Neri, y fue a su entierro la Real Audiencia pero no asistió el señor virrey.

El día 1Q de este mes en México, se prendió fuego en el Hospital Real, y se quemaron varios trastos sin haber habido mayor daño. Y este día fue la fiesta de Nuestra Señora de los Remedios.

El día 6 de septiembre de 1788, sacaron de la Acordada dos hombres para darles garrote por salteadores de caminos y aseónos. Y este día en la tarde, en la misma cárcel de la Acordada, cayó un rayo y mató al centinela que estaba en la puerta llamado Ignacio Gálvez.

Nota

En esta semana entraron a México once alemanes que venían de España para el Tribunal de Minería, de los cuales tres eran católicos y el resto protestantes.

Diario de sucesos de México • 195

El día 11 de septiembre de 1788 en México, en el convento de San Francisco, murió el reverendo padre fray José de Lcyva, que había sido guardián provincial en varios conventos y consultor del Santo Oficio. El día 12 en la tarde fue enterrado en el mismo convento por los padres dominicos.

El día 13 de septiembre de 1788, tomó posesión en México de director general del Tribunal de Minería don Fausto Elhuyar, el cual vino de España con la expedición de los alemanes mineros. Y este mismo día en el Real Palacio, se estrenó el Tribunal de Minería en lo que antes era la Sala del Crimen.

El día 15 de septiembre de 1788, entró a México el Correo de España, y en él le vino al señor coronel don Bernardo Bonavía, el nombramiento de corregidor intendente de México, y al señor secretario don Fernando de Córdoba, que pasase a España a ocupar la plaza de oficial de una de las covachuelas.

El día 19 de septiembre de 1788 en México, murió don Manuel Cornejo, caballero de la Orden de Santiago y alcalde mayor de Papanda. El día 21 del mismo se enterró en la iglesia de San Agustín, y murió tan pobre, que fue necesario que los caballeros de su orden le juntasen de limosna el costo de su entierro.

El día 22 de septiembre de 1788 en México, se entregó la guarnición de la plaza del Regimiento Urbano del Comercio, que la tenía el de Dragones de España. El capitán que entregó la guarnición fue don Juan Bermúdez, en lunes.

El día 26 de septiembre de 1788 en México, salió la cuerda de presidiarios de las tres cárceles. Y este día, estándose armando la plaza de toros en la Plazuela de las Vizcaínas, y ya casi a la mitad, llegó orden del señor virrey para que se suspendiese en aquel sitio, y se pasó a tomar medida en la Plazuela de San Pablo.

El día 29 de septiembre de 1788 en México, en el Real Palacio, tomó posesión de alabardero don José Guardiola, habiendo salido del Regimiento de Dragones Provinciales de Puebla, donde era cabo de Escuadra. Fue el primer alabardero que hubo de esta clase.

El día 1s de este mes, salió de México para Durango la Primera División de Dragones del Regimiento de España, y fue el capitán don Juan de Güete, en miércoles.

El día 3 de octubre de 1788 en México, tomó posesión de corregidor intendente el coronel don Bernardo Bonavía, caballero de la Orden de Alcántara. Y este mismo día tomó posesión de regidor de esta Nobilísima Ciudad don N. Teruel.

El día 4 de octubre de 1788, entró a México el aviso de España y no trajo cosa particular. Al día siguiente fue la misa de gracias, a la que no asistió el señor virrey, y sí una compañía de granaderos del Comercio.

El día 7 de octubre de 1788 en México, en el real acuerdo, tomó posesión de alcalde de Corte el señor don Agustín Ignacio Ampara y Orbe, que vino de la Audiencia de Santo Domingo, pero no asistió el señor virrey, y quien le dio la posesión fue el regente don Francisco Javier Gamboa.

El día 9 de octubre de 1788 en Méxicó, sacaron de la cárcel de Abajo a un hombre, para darle 200 azotes.

Nota

Los días 4,7 y 10 de este mes, salieron de México para Durango la Segunda, Tercera y Cuarta División de Dragones del Regimiento de España.

El día 13 de octubre de 1788 en México, se mudó la estafeta del Correo General que estaba en las Escalerillas, a una de las casas nuevas del doctor Borda en la calle de San Francisco.

El día 15 de octubre de 1788 en México, se prendió fuego en uno de los jacales del Puente de Palacio, y en un instante pasó a los cajones de enfrente y se quemaron los tejados y chamuscaron las puertas de las casas. Salió el señor virrey con la Guardia de Alabarderos y se remedió pronto, aunque hubo mucha pérdida, en miércoles día de Santa Teresa de Jesús.

El día 20 de octubre de 1788, salió de México para Veracraz el señor secretario del Virreinato don Fernando Córdoba, y de este puerto a España, para ser oficial de una de las covachuelas.

El día 28 de octubre de 1788 en México, en el Molino de Santa Mónica, hubo un gran banquete en celebridad de la hija única del señor don Gabriel Gutiérrez de Terán, novia de don José Luis Flórez, hijo del virrey.

El día 31 de octubre de 1788 en México, se dio una providencia por el señor virrey para que en el Portal de los Mercaderes, que es donde se ponen las ofrendas de muertos, no entrara coche, ni caballo, ni burro, y para esto se puso una Valla en las dos esquinas del portal.

i

Diario de sucesos de México • 197

oviembre de 1788

El día 14 de este mes en México, en la Santa Iglesia Catedral, se hicieron las honras militares y no asistió el señor virrey. El predicador fue el señor canónigo Valencia.

El día 16 de noviembre de 1788 en México, en la plaza de toros de San Pablo, fue el primer ensayo de éstos, que estuvo muy malo, de manera que a los asentistas don Manuel Lozano y a Campos, les pusieron unos versos bien indecorosos. El día 23 fue el segundo ensayo y los toros estuvieron tan malos como los anteriores.

El día 27 de noviembre de 1788 en México, entró el Correo de España, y no trajo más novedad que los honores de alcalde de Corte para el asesor general don Pedro Valenzuela.

éDiciembre de 1788

Los días 19 y 2 de este mes en México, comenzaron las corridas de toros y no estuvieron tan malos.

El día 3 del mismo, en el Santuario de Nuestra Señora de Guadalupe, se bendijeron las banderas del Regimiento Fijo de México, el cual entró a la ciudad e hizo guardia en Palacio al mando del capitán don Juan Flórez, hijo del señor virrey.

El día 11 de diciembre de 1788 en México, sacaron de la cárcel de Corte a una mujer emplumada por alcahueta, y después de haber recorrido las calles acostumbradas, y de haberla puesto en un tablado, la llevaron a las Recogidas. Y este día en la tarde en la Universidad, estando convidado lo mejor de México para un acto del Jardín Botánico, se suscitó una etiqueta en la que se desairó al señor regente Gamboa, por lo que el día 13, el señor virrey tuvo un acuerdo que duró desde las diez de la mañana hasta las dos de la tarde.

Los días 15 y 16 de este mes en México, fue la segunda semana de toros y no estuvieron malos. El día 17 no hubo toros, y los días 18 y 19 fueron los últimos en que se inventó la presencia de un carro alegórico, pero tanto éste como los toros estuvieron muy malos.

El día 19 de diciembre de 1788 en México, murió una de las hijas del señor Terreros, hermana del conde de Regla, y fue su entierro al día siguiente de deán y Cabildo en Catedral.

El día 20 de diciembre de 1788 en México, habían de sacar de la cárcel de la Acordada dos hombres para ahorcarlos, uno gachupín y otro poblano; pero no sacaron más que al poblano, porque al gachupín, dijeron, le había

I

dado un accidente que lo privó. Este gachupín llamado Isidro Ulabarría, era riojano, hijo de un vizcaíno, en sábado. '

El día 22 de diciembre de 1788 en México, hubo un acuerdo en el Real Palacio al que asistió el señor virrey.

El día 30 de diciembre de 1788 en México, tomó posesión de regidor don Manuel Luyando, y el 31 del mismo con igual empleo, don Ignacio Cisneros.

&?f'no de 1789. Enero

El día 10 de este mes en México, salió reelecto de alcalde de Primer Voto el marqués de Uluapa, y de Segundo don Ignacio Gómez de Cervantes. El Ayuntamiento se mantuvo reunido hasta las seis y media de la tarde, y hasta esta hora se presentó el virrey.

Nota

De este año en lo sucesivo, no ha de haber más que un alcalde, pues el de Segundo Voto pasará a ser en el próximo año de Primer Voto.

El 5 de enero de 1789 en México, entró el Correo de España y trajo como novedad, que había muerto en Portugal el príncipe de Brasil. También se supo que en España, por haber hablado mal del gobierno, salieron desterrados de la Corte cuatro tenientes generales.

El día 6 del mismo fue la misa de gracias, a la que no asistió el señor virrey.

El día 12 de enero de 1789 en México, sacaron de la cárcel de Corte a dos

I

homicidas para ahorcarlos en la Plaza Pública. Y este día, el asesor general don Pedro Jacinto Valenzuela, tomó posesión de'alcalde de Corte honorario.

El día 13 de enero de 1789 en México, fue electo prior don José Ceva- llos, y como cónsul don Francisco Iraeta.

Diario do sucosos de México • 199

El día 19 de enero de 1789 en México, tomó posesión de oidor de esta Real Audiencia don Félix Díaz Ovejero, y de alcalde de Corte don Emeterio Cacho Calderón de la Barca, en lunes. Y este mismo día en la Puebla de los Ángeles, murió el señor obispo de aquella Diócesis, don Santiago José Echeverría, que fiie sepultado el día 22.

El día 20 de enero de 1789 en México, a las siete de la mañana, murió el doctor en medicina don Juan de la Peña, llamado El Santo, cuyo cadáver pasó a la Universidad donde concurrió mucha gente a besarle los pies y su ropa. Vestido de golilla con espadín, botas y bastón, se sepultó al día siguiente en la Catedral como si fuese un virrey, en la capilla de Nuestra Señora la Antigua.

El día 22 de enero de 1789 en México, se estrenaron en la Catedral, en las vísperas de San Ildefonso, santo del señor arzobispo de México, seis blan- doncillos de oro y un Cristo del mismo metal con peso de 92 marcos.

El dia 23 de enero de 1789 en México, entró el Correo de España, y en él vino al doctor don José Pérez Calama, canónigo de Valladolid, la Mitra de Quito. La misa de gracias fue el día 25 y no asistió el señor virrey.

El día 12 de este mes en México, en los bajos de la casa del doctor Borda, se encontraron muertos y sin herida alguna un hombre y una mujer, con las caras verdes y muy monstruosos. Y por estar pegada adentro la llave de su habitación, fue preciso descerrajar la puerta, y los cadáveres fueron llevados a la Diputación. Este mismo día, sacaron 13 hombres de la cárcel de la Acordada, dándoles 200 azotes por las calles acostumbradas. Y por instrucciones del señor virrey, se pusieron de centinelas a dos alabarderos para que no entrare nadie a su habitación.

El día 13 de febrero de 1789 en México, se publicó un bando por el señor corregidor don Bernardo Bonavía, para que ninguna vinatería tuviese cortinas en sus puertas.

El día 14 de este mes, salió la cuerda de las tres cárceles para presidio.

El dia 24 de febrero de 1789, a las siete y media de la noche, entró a México el Correo de España, y por él se supo de la muerte del infante don Gabriel, la de su mujer y su hijo en tres domingos consecutivos; circunstancia que se hizo muy notable. También vino la noticia de que el rey don Carlos

200 • José Gómez

III, estaba muy malo y sacramentado, y que al capitán de Zamora don Tomás Rodríguez Vietma, le confirmaban su plaza de sargento mayor. i

t

(arzo de 1789

El día 12 de este mes en México, a las cuatro de la tarde, entró el Correo de España con la fatal noticia de la muerte del rey. Murió su majestad que en paz descanse, a las 12 y 40 minutos de la mañana del día 14 de diciembre de 1788, y el día 16 a las cuatro y media de la tarde, salió su entierro del Real Palacio para el sitio del Escorial. El mismo día que entró el correo, se repicó en México por la salud del nuevo monarca Carlos IV, y el día 14 fiie la misa de gracias a que asistió el señor virrey.

El día 16 de marzo de 1789, hubo mucho alboroto en la ciudad, porque los comisarios de la Acordada trajeron preso al famoso ladrón Paredes, mismo que vino bien peinado y con un coleto bordado muy rico y con una manga muy especial.

El día 23 de marzo de 1789 en México, a las diez menos cuarto de la mañana, se publicó el bando de los lutos, dando a conocer la muerte de nuestro católico monarca el señor don Carlos III, y se hizo de la siguiente manera: A las nueve tres cuartos de la mañana salieron de la Diputación con atabalillos los ministros de luto, a quienes siguieron los regidores, el corregidor y los alcaldes ordinarios a caballo, y luego que entraron a Palacio, subieron a donde se hallaba su excelencia y los oidores de la Real Audiencia, a solicitar su venia para la publicación del bando. Y acabado éste en la puerta principal, se hizo la señal y comenzó a sonar la primera campanada, tocándose tres campanazos más cinco cañonazos de artillería, uno cada cuarto de hora hasta la queda, y al día siguiente continuaron hasta completar el número como lo manda la ordenanza. Adviértese que en Palacio en el balcón principal, lo mismo que en el Arzobispado y casas de Cabildo, se puso una cortina encarnada y encima de ella otra negra.

Nota

El día 24, a las seis menos cuarto de la mañana, se acabaron de tocar 240 campanadas y se empezó el doble que duró casi todo el día, siendo la víspera

Diario de sucesos de México • 201

de la Encamación. Acerca de la banda de luto que traían los oficiales reales, hubo su etiqueta, pues el virrey mandó que se la quitasen porque no les correspondía, y sí a los pajes de su excelencia, a los cuales ordenó que sólo se la pusiesen el día del bando.

El día 30 de marzo de 1789 en México, sacaron de la cárcel de Corte a un hombre para ahorcarlo, y en ese instante cayó un jacal en la Plaza y lastimó a muchos indios que estaban trepados en él.

El día 31 de marzo de 1789 en México, en el Real Palacio, fue el pésame de la muerte de nuestro católico monarca el señor don Carlos III. El virrey recibió a todos los tribunales, a los prelados y a toda la oficialidad bajo dosel, estando la real sala vestida de luto. Cuando salió el Cabildo eclesiástico de la Catedral para Palacio, se hizo señal con un doble magnífico, y lo mismo cuando vino el señor arzobispo que fue el último de la mañana, y a la tarde vino el Santo Tribunal de la Inquisición, el de la Santa Cruzada y el Cabildo de la Colegiata de Nuestra Señora de Guadalupe, que fue el último.

QÍiril de 1789

El día 10 de este mes en México, mandó el señor virrey que se quitase el luto de la sala de recibir.

El día 9 de abril de 1789 en México, en la tarde, salió el señor virrey a visitar la capilla de Nuestra Señora la Antigua, y allí se estuvo hasta las siete y media de la noche, en que volvió a Palacio con la Guardia de Alabarderos alumbrado con hachas de siento, cosa bien memorable.

El día 10 de abril de 1789 en México, Viernes Santo, se armó una tempestad de truenos y relámpagos muy grande, de suerte que a las cuatro de la tarde cayó uno en el barrio de Montserrate, a que siguió un fuerte aguacero que duró hasta las dos de la mañana del día siguiente, por lo que no salió de Santo Domingo la procesión del Santo Entierro.

El día 29 de abril de 1789 en México, sacaron de la cárcel de la Acordada a doce hombres, dándoles 200 azotes.

El día 30 de abril murió la señora regenta, esposa del señor regente don Francisco Javier Gamboa. Se enterró al día siguiente en la iglesia del convento de la Merced.

(jJ^ Cayo de 1789

El día 2 de este mes, a la una de la tarde, entró a México el Correo de España con las siguientes noticias: Que estaba previsto para el Virreinato de esta Nueva España el señor conde de Revillagigedo. Que el caballero Croix, virrey de Lima, lo habían promovido a coronel de Guardias Valonas. Que para el Virreinato que éste dejaba, pasaría el que lo era de Nueva Granada, don Gil de Lemus, y a éste lo supliría el gobernador de Cuba don José Espeleta. Que al gobernador dq Veracniz, un tal Troncoso, le vino el grado de mariscal de campo, e igual graduación a don Pedro Mcndieta, subinspector de este reino. Que el día 17 de enero de este año, se había hecho la proclamación de nuestro católico monarca Carlos IV en Madrid. Y de él vino a México su retrato y el de la reina coronados de laurel, y una moneda de las que se tiraron en su proclamación, en cuyo anverso se veían las armas reales, y por el reverso un mote en latín con los nombres del rey y el de la reina.

El día 8 de mayo de 1789, entró a México el Correo de España, y en éste le vino al hijo del señor virrey Flórez la licencia para casarse.

El día 9 de este mes, fue la misa de gracias a la que no asistió el señor virrey.

El día 18 de mayo de 1789 en México, en el real acuerdo, tomó posesión de alcalde de Corte don Francisco Saavedra y Carvajal, y fue este señor el primero que entró a esta sala en el reinado de Carlos IV, y no asistió el señor virrey.

El día 19 de mayo de 1789 en México, fue el segundo de la letanía, que habiendo de ir al convento de San Agustín*por estar componiéndose la acequia que atraviesa, la llevaron a la iglesia de las monjas de la Enseñanza.

El día 24 de mayo de 1789, en el pueblo y convento de San Joaquín de los Carmelitas, se cruzó de caballero de la Orden de Alcántara el capitán de Milicias de Toluca, don Esteban...

Los días 26 y 27 de este mes, en la Santa Iglesia Catedral, fueron las honras fúnebres de nuestro católico monarca el señor don Carlos III, que estuvieron muy lucidas y concurridas, pues asistieron todas las comunidades a cantar su misa y su responso en las capillas que les cupo. Asistieron todos los tribunales y el señor virrey don Manuel Antonio Flórez.

El día 28 de mayo de 1789 en México, en el convento de Santo Domingo, los inquisidores celebraron las honras fúnebres de Carlos III, y es-

Ditirin de sucesos de México • 203

tuvieron magníficas. Concurrieron como en Catedral todas las comunidades cantando sus misas y responsos.

El día 30 de mayo, día de San Femando, fueron los días del príncipe de Asturias, el señor don Fernando de Borbón, y hubo en Catedral misa de gracias y besamanos en Palacio. Este mismo día murieron don Bernardo Calderón, cabo de Alabarderos, que se enterró en el Sagrario, y una monja de 106 años de edad, del convento de San Bernardo, que tomó el hábito de 46 años y vivió profesa 60.

)funio de 1789

El día 10 de este mes en el Santuario de Nuestra Señora de Guadalupe, extramuros de la ciudad, se hicieron las honras fúnebres al rey. No hubo sermón porque no es costumbre en dicho santuario, pero sí cinco responsos, cantando el último el señor abad, quien también ofició la misa.

El día 11 de junio de 1789 en México, fue la función de Corpus y hubo misa a la que no asistió el virrey, ni se hizo salva con artillería, cosa que extrañó mucho. Y este día, se dio orden de que se quitara la enramada que ponen los indios hasta las tres de la tarde, lo cual fue muy acertado.

Nota

En la función de Corpus ya dicha, se estrenaron en la Catedral cuatro ramilletes de oro que regaló el doctor don Leonardo de Terraya, deán de esta santa iglesia, los cuales son de 22 quilates con peso de 30 marcos dos y media onzas, que componen 1515 castellanos cinco tomines, y su valor con la hechura importó cuatro mil novecientos veinticinco pesos seis reales.

El día 21 de junio de 1789, hubo un auto de fe en la iglesia de Santo Domingo, en el que sacaron a seis reos: cuatro blasfemos, un celebrante y un hereje sanbenitado de nación francés y de oficio pintor. Este auto duró hasta las tres de la tarde y al día siguiente 22, sacaron a estos penitenciados dándoles a cada uno 200 azotes por las calles acostumbradas.

204 • José Gómez

fulio de 1789

El día 6 de este mes, en el Cuerpo de Guardia de Alabarderos, tomó posesión el soldado don Jerónimo Alcalde, por la vacante del cabo don Bernardo Calderón. Y este mismo día en que se dio a conocer como cabo suplente de este cuerpo a don Toribio Parra, fueron presentados tos tres cabos segundos de la siguiente manera: en la escuadra primera del cabo don Pedro Palacios, a don Joaquín Castillo; en la escuadra segunda del cabo don José Gómez, a don José Moreno, y en la escuadra tercera del cabo don Toribio Parra, a don Juan Zapata.

Nota

Adviértese que este día, a las dos menos cuarto de la tarde, tuvimos en la ciudad un temblor muy fuerte, y fue en lunes.

El día 10 de julio en el Real Palacio, se mandó por el señor virrey que el día 12, la Compañía de Alabarderos pasase revista de inspector, como se verificó por el mariscal de campo don Pedro Mendinueta, siendo la primera revista que pasaba este cuerpo que contaba lh antigüedad de 225 años.

El día 14 de julio de 1789 en México, sacaron del convento de Santo Domingo al padre fray Antonio de San Alberto, carmelita, el cual había estado en dicho convento desde el 28 de septiembre de 1788, habiéndose fugado de la prisión del convento de San Joaquín, donde había estado por espacio de 26 años. Lo volvieron a dicho convento por orden de la Real Audiencia y del señor virrey.

El día 18 de julio de 1789, sacaron de la cárcel de la Acordada seis hombres para ajusticiarlos, cuatro con horca y dos con garrote. Pero esta ocasión vióse por primera vez, desde que se erigió el Tribunal de la Acordada, un caso insólito y fue, que tres de las cabezas de estos reos se pusieron en unas jaulas de fierro, por tratarse de ladrones sacrilegos.

El día 21 de julio de 1789, entró a México el Correo de España y por él se supo que a petición del rey, Su Santidad el Papa había creado dos cardenales españoles, uno de ellos el señor Lorenzana, patriarca de las Indias y arzobispo que había sido de México.

Diario de sucesos de México • 205

El día 23 de julio de 1789 en México, por petición de los señores curas, se quitaron las tres cabezas de los ajusticiados del día 18. Dos de estas cabezas se enterraron en la Catedral y la otra en la parroquia de San Miguel, y ftie en jueves.

El día 29 de julio de 1789, en la Catedral y las demás iglesias de México, se echó un repique general por el ascenso a cardenal del arzobispo de Toledo que había sido de México, señor don Francisco Lorenzana. Y este mismo día, en ia Santa Iglesia Catedral, hubo una gran función de gracias y se cantó el te deum, y concurrieron todas las comunidades.

Od'gosto de 1789

El día 10 de este mes en México, fue el Corpus de la parroquia de la Santa Veracruz, que estuvo muy especial, y lo más notable fue que entró por la Alameda como nunca se había visto.

El día 11 de agosto de 1789 en México, llegó el señor virrey don Manuel Flórez del pueblo de San Ángel, donde estuvo dos días, y a las ocho y media de la mañana vino un extraordinario de Veracruz con la noticia de que el día 9, en el navio San Ramón, había llegado a aquel puerto el señor conde de Revillagigedo, que salió de Cádiz el 7 de junio y venía a relevar de su cargo al virrey don Manuel Antonio Flórez.

El día 13 de agosto de 1789 en México, entró el caballero criollo don Ramón de Lardízabal, gentil hombre del nuevo virrey, segundo conde de Revillagigedo.

El día 14 de agosto llegó el Correo de España, y en él le vino título al conde de Medina de sumiller cortina de Oratorio, y a su hermano el grado de teniente coronel del Ejército.

El día 18 de agosto de 1789 en México, sacaron de la cárcel de la Acordada 18 reos, dándoles 200 azotes por las calles acostumbradas.

El día 20 de agosto de 1789, en el Palacio Arzobispal, prestó su juramento el señor conde de Medina de sumiller cortina de Oratorio, y luego pasó a ver al señor virrey.

El día 22 de agosto de 1789 en México, por orden del señor virrey don Manuel Antonio Flórez, tomaron posesión en la Sala de Cabildo seis regidores honorarios, que debieron haberlo hecho el día 1Q de este año, pero por haberse opuesto a ello los señores capitulares, se siguió un pleito en la Real

206 • José Gómez

Audiencia hasta que por decreto hubo necesidad de ponerlos por la fuerza

con la provisión de 300 hombres armados. Los nuevos regidores asistieron a la función de Catedral y besamanos el día 25.

El día 26 de agosto de 1789, entró un correo a México del puerto de San Blas con la noticia de que nuestra Armada, había apresado cuatro embarcaciones inglesas, y dos más habían escapado.

El día 29 de agosto de 1789 en México, en el oratorio del Real Palacio, el secretario del arzobispo veló al hijo del señor virrey que se llamaba don José Flórez.

La mañana del día 5 de este mes en México, por orden del señor virrey don Manuel Antonio Flórez, se publicó un bando con mucha solemnidad, en el que salieron el Cuerpo de Sargentos del Regimiento Fijo de México y una compañía de granaderos del mismo con todos los tambores y la música, que por eso se llama a edictos y pregones, por el que se ofrecía gratificar con 500 pesos al que presentase vivo, o 300 muerto, al teniente del Regimiento Fijo de Guadalajara don Francisco Silvestre, homicida de don Gabriel de Aspiro la noche del 27 de julio de 1786. Dicho bando causó mucha impresión en México.

El día 18 de septiembre de 1789, sacaron de la cárcel de Corte para ajusticiarlos a dos homicidas. Uno era indio otomite y el otro, que se llamaba Joaquín Quintana, músico de Catedral y monaguillo que había sido del Sagrario, mató a palos a un hombre en una accesoria de San Ildefonso, el día 14 de febrero de 84. Las escaleras de éstos en la horca las pusieron mirando hacia la Catedral, circunstancia que se notó mucho.

El día 22 de septiembre de 1789 en México, se finalizaron los lutos por nuestro católico monarca el señor don Carlos III, y el día 24 de la cárcel de Corte, sacaron a un soldado del Regimiento de Dragones para ajusticiarlo, llamado José Manzano.

El día 5 de este mes, salió el señor virrey don Manuel Antonio Flórez al Santuario de Nuestra Señora de Guadalupe, a entregar el bastón a su sucesor don

Diario de sucesos de México • 207

Juan Vicente de Güemes Pacheco Padilla, segundo conde de Revillagigedo; salió del Real Palacio sin que se le hiciesen los honores, porque no quiso.

El día 15 de octubre de 1789 en México, sacaron de la cárcel de la Acordada para ajusticiarlos a nueve hombres, siendo uno de ellos el famoso ladrón Paredes.

El día 16 de octubre de 1789, en la Villa de Guadalupe, entregó el bastón de mando el señor don Manuel Antonio Flórez al virrey nuevo, conde de Revillagigedo.

El día 17 de octubre de 1789 en México, entró el señor virrey conde de Revillagigedo, pero desde que se conquistó este reino no se había visto entrar virrey con mayor ostento ni gran pose; entró en un coche inglés con seis caballos muy enjaezados con sus penachos de plumas en las cabezas, y dos volantes por delante muy bien vestidos, cosa que causó mucha novedad.

El día 19 de este mes, salió de la Villa de Guadalupe el señor virrey don Manuel Antonio Flórez, y de allí partió a España.

El día 24 de octubre de 1789 en México, amaneció la mayor novedad y desgracia que se ha visto, y fue que en su propia casa mataron para robarlo, a don Joaquín Dongo y a un cuñado suyo y a nueve criados que tenía: cinco hombres y cuatro mujeres, que con la del amo y el cuñado fueron once. Las muertes que mayor espectáculo no se ha visto ni se lee en historias. Y fae siendo virrey el señor conde de Revillagigedo, que esc día hizo ocho días que había tomado posesión.

El día 25 de octubre de 1789 en México, entró el aviso de España y no trajo cosa particular, y fue el primero que recibió el señor conde de Revillagigedo.

El día 27 de octubre de 1789, fue la misa de gracias y no asistió el señor virrey, y a la salida de Palacio no se le hizo la guardia de honores a la Real Audiencia (pero a la vuelta se los hicieron), y ni tampoco asistió la Compañía de Granaderos por haber estado toda la noche de patrulla.

El día 29 de octubre de 1789 en México, en la calle del Águila, en una accesoria que mira al norte, número 21, se encontró el dinero que robaron a don Joaquín Dongo, que lo que se halló fue 23 mil pesos entalegados y se trajeron en un carro a depositarlos en cajas reales, y se hicieron presos en la cárcel de Corte a tres sujetos que fueron los que hicieron las muertes y el robo: dos paisanos gachupines y un alférez de Milicias de las islas Canarias, a los que se les está siguiendo su causa.

oviembre de 1789

El día 2 de este mes en México, salió la cuerda de presidiarios de las tres cárceles con 300 hombres, y fue la primera que salió siendo virrey el señor conde de Revillagigedo.

El día 3 de noviembre de 1789 en México, en el Real Palacio, le puso el virrey a don Juan de la Riva la cruz de la distinguida Orden de Carlos III.

El día 4 de noviembre de 1789 en México, día de nuestro católico monarca don Carlos IV, asistió el virrey a Catedral a la misa de gracias'. Y este día a las cuatro de la tarde, hubo un repiqué general en todas las iglesias por la beatificación del venerable fray Sebastián de Aparicio, franciscano y gallego de nación.

El día 5 de noviembre de 1789 en México, metieron en capilla a los tres reos que hicieron las muertes de Dongo y su familia. Estos reos se llaman don Felipe Aldama, que fue el que hizo siete muertes, otro don Joaquín Blanco, y el otro que era piloto y no alférez como se dijo, don Baltazar de Ávila y Quintero, hijo de la isla del Fierro en las Canarias.

El día 7 de noviembre de 1789 en México, sacaron de la cárcel de Corte a don Baltasar de Ávila y Quintero, a don Felipe Aldama y a don José Joaquín Blanco, para ajusticiarlos, y los llevaron por la calle de los Cordobanes, que era donde vivía el difunto don Joaquín Dongo, y salieron en muías enlutadas y ellos también enlutados, y les echaron pregón y les tocaron clarín, y luego los trajeron a la Plaza en donde estaba un tablado todo enlutado con sus tres asientos, en donde les dieron garrote: primero a Quintero, luego a Aldama, y después a Blanco, y habiéndose acabado la justicia a la una del día, dejaron los cueipos hasta las cinco de la tarde, y en el mismo tablado por un verdugo y fe de escribano se rompieron el bastón y los tres machetes. Luego que los bajaron los llevaron a la cárcel y allí Ies cortaron las manos derechas, y la de Quintero la pusieron en la accesoria donde vivía y se encontró el dinero, y las de Aldama y Blanco en la casa de Dongo. Fueron amortajados con hábito de San Fernando y los depositaron en la capilla de la Cruz de los Talabarteros. El día 8, a las diez de la mañana, fueron sus entierros en la parroquia de la Santa Veracruz, que estuvieron muy magníficos con grande acompañamiento, con que se acabó todo.

t

Diario de sucesos de México • 209

El día 9 de noviembre de 1789 en México, sacaron de la cárcel de la Acordada cinco hombres, dándoles doscientos azotes por varios delitos, y fiieron los primeros en el gobierno del señor virrey conde de Revillagigedo.

El día 10 de noviembre de 1789 en México, salió un trozo de presidiarios de las tres cárceles.

El día 14 de noviembre de 1789 en México, en la noche, se pusieron por el norte unas nubes que parecían llamas de fuego, por lo que se alborotó la gente y se hizo en varias iglesias rogativa. Fue tanta la confusión de la gente que era asombroso; unos pedian misericordia, otros rezaban; las mujeres lloraban y en una palabra, fue noche de juicio. Unos se fueron a Nuestra Señora de Guadalupe, otros al Calvario y a otras iglesias, y no se encontraban por las calles más que cuadrillas de hombres y mujeres y muchachos, llorando unos y rezando otros, y fue siendo virrey el señor conde de Revillagigedo, que hacía veintiocho días que había tomado posesión del Virreinato.

El día 20 de noviembre de 1789 en México, entró el Correo de España y no trajo cosa particular, sino la canonjía del cura de Santa Catalina, don Juan Bruno.

Los días 23, 24,25 y 26 de noviembre de 1789, en México, fue la primera semana de toros y fiieron las fiestas reales por la entrada del señor virrey, conde de Revillagigedo, y Rieron en lunes, martes, miércoles y jueves, y no bajó el señor virrey más que dos tardes, la primera y la última.

El día 25 de noviembre de 1789 en México, en la Santa Iglesia Catedral, fiieron las honras de los militares y asistió el señor virrey con toda la oficialidad, y fueron las primeras que le hicieran a este señor, conde de Revillagigedo. En éstas dieron la Compañía de Granaderos tres descargas que no se había visto hasta éstas.

*&Diciembre de 1789*

El día 1Q, 2Q, 3° y 4a de este mes, en México, fue la segunda semana de toros, y en ésta bajó el señor virrey dos medias tardes, y el último día que fue viernes hubo una desgracia, y fue que un toro ya casi muerto cogió a uno de los rejoneadores y lo hirió malamente. Era el toreador de Tarímbaro, y fue siendo virrey el señor conde de Revillagigedo.

Los días 3,4 y 5 de diciembre de 1789 en México, fueron los tres días de luminarias por el nacimiento de la infanta doña María Isabel de Borbón

210 • José Gómez

y Farnecio, hija de nuestro católico monarta el señor don Carlos IV, que Dios guarde.

El día 8 de diciembre de 1789 en México, en el convento de San Agustín los alabarderos estrenaron en su capilla cuatro arbotantes de plata que dio de limosna don Juan de Miranda, siendo mayordomo don Joaquín del Castillo y sacristán yo, José Gómez.

El día 9 de diciembre de 1789 en México, se celebraron los años de nuestra reina y señora, y mandó el señor virrey conde de Revillagigedo que las tres descargas de la artillería frieran la primera a las seis de la mañana y la segunda a las doce del día, y la tercera a las cinco y media de la tarde, y fue la primera vez que se vio a estas horas porque siempre habían sido a las tres, cuatro y cinco de la tarde.

El día 17 de diciembre de 1789 en México, se quitó la mano de José Castillo que había estado en la picota debajo de la hoVca en la Plaza, desde el día 18 de enero del año de 1788, en que fríe ajusticiado. También se quitaron las tres manos de los reos de la muerte de Dongo: Quintero, Aldama y Blanco, y fue siendo virrey el señor conde de Revillagigedo, y se quitaron porque el día 27 de diciembre había de ser la jura del rey.

El día 18 de diciembre de 1789 en México, se quitó la horca de la Plaza Mayor para la jura del rey.

El día 20 de diciembre de 1789 en México, se presentó al señor virrey el señor obispo de Quito, don José Pérez Calama, que era deán de Valladolid.

El día 25 de diciembre de 1789 en México, en el Real Palacio, por mandado del señor virrey conde de Revillagigedo, se empezó a tirar la escalera de palo que subía al Cuerpo de Guardia de Alabarderos.

El día 27 de diciembre de 1789 en México, fue la jura de nuestro católico monarca el señor don Carlos IV, que Dios guarde, y lo juró el señor regidor don Ignacio Iglesias, pero desde que se conquistó el reino no se han hecho fiestas más magníficas ni más lucidas, y fueron tres días, 27, 28 y 29, pero fiie la jura por la tarde por ser día de fiesta y último que trabajó. Salió una orden del señor virrey para que ninguna tienda se abriera con la multa de 25 pesos, y todas tres noches hubo por toda la ciudad iluminación general y muchos castillos de fuego, y en todas las oficinas del rey se pusieron perspectivas y doseles con los retratos del rey y de la reina, esto es en la calle en las puertas de cada oficina, y el día último hubo en las casas de Cabildo un gran baile y asistió el señor virrey, que se retiró a la una de la noche. Y el baile duró

Diario de sucesos de México **211*

hasta las cuatro de la mañana, de forma que no se han visto en México las calles más bien compuestas que en esta ocasión. Enfrente del Sagrario se puso una pirámide con el rey a caballo, que estaba muy bueno.

El día 28 fiie la misa de que se acabó a la una del día, que estuvo magnífica. El día 29 en el Real Palacio fue el besamanos, con que se finalizó todo.

Nota

El día 27 que fue el de la jura, estrenaron los jefes de todas las oficinas uniformes nuevos que se componían de casaca y calzones encarnados de paño de grana, y la chupa y vuelta azul con alamares de plata, y fue siendo virrey el señor conde de Rcvillagigedo.

El día 30 de diciembre de 1789 en México, en el Real Palacio, en el Cuerpo de Guardia de Alabarderos, se echaron las losas abajo del Santísimo Cristo Crucificado que iba para las madres capuchinas de Nuestra Señora de Guadalupe, que enlosaron los alabarderos y los pagué yo, José Gómez, cabo de dicha guardia, que me costaron un peso, cuatro reales.

El día 31 de diciembre de 1789 en México, salió la cuerda de presidiarios de las tres cárceles.

El día 12 de enero de este mes en México, salió de alcalde ordinario don José

Jerónimo Villar Villamil.

El día 6 de enero de 1790 en México, en el barrio de la Santa Vera- cruz, los muchachos hicieron una jura del rey nuestro católico monarca el señor don Carlos IV, que Dios guarde, con todas las ceremonias con que se hizo el de la jura grande en la Plaza Mayor, y tiraron sus monedas y fue siendo virrey el señor conde de Rcvillagigedo.

El día 9 de enero de 1790 en México, entró el Correo de España y no trajo cosa particular, y este mismo día entraron los cajones de las cartas de Manila de la nao que había llegado.

El día 12 de enero de 1790 en México, en el Real Palacio, le puso el señor virrey conde de Revillagigedo la cruz de la distinguida Orden de Carlos III, a don Antonio Basoco.

El día 19 de enero de 1790 en México, en el Real Palacio, por orden del señor virrey conde de Revillagigedo, se quitó la Virgen de la Soledad de la escalera de Palacio y se llevó a colocar a la iglesia de las reverendas madres del convento de Santa Inés.

El día 20 de enero de 1790 en México, pasó el señor arzobispo a bendecir la iglesia nueva de Santa Inés.

El día 21 de enero de 1790 en México, se estrenó la iglesia de las reverendas madres de Santa Inés, y estuvo patente el Santísimo Sacramento y dijo la misa de pontifical el señor arzobispo, y predicó el señor doctor Moreno, canónigo de la Colegiata de Nuestra Señora de Guadalupe, y fue sin haberse acabado la media naranja de la cúpula, y fue siendo virrey el señor conde de Revillagigedo y arzobispo de México el señor don Alonso Núñez de Haro y Peralta.

El día 25 de enero de 1790 en México, en el Real Palacio, se quitó por orden del señor virrey conde de Revillagigedo, la Virgen de Guadalupe que estaba en el zaguán de la puerta principal. Y este día en los toros hubo carreras de caballos que no estuvieron malas.

El día 26 de dicho mes y año, fue el segundo día de toros y no hubo

I

carreras.

El día 27 de dicho mes y año, fue el tércer día de toros y no hubo carreras, y este día por mandato del señor virrey, salió el alguacil de la Policía vestido de golilla, que antes salía de manga o de capote.

El día 28 del mismo, fue el cuarto día de toros, y este día hubo carreras y no estuvieron malas.

El día 31 de enero de 1790 en México, hubo iluminación en cuatro partes a saber: en la Diputación, en la Casa de Moneda, en la plaza de los toros y en la calle de los Plateros, y en donde está el rey a caballo en la plaza grande, que estuvo de lo más especial que se ha visto en México; y esta noche salió el señor virrey conde de Revillagigedo a pie, a ver todas las iluminaciones, pero la calle de los Plateros se llevó la palma. Y este mismo día, salieron las escuelas de niñas de primeras letras, que no había ojos con que mirarlas de bien vestidas, y tuvieron su misa y sermón en la iglesia de San José el Real, pero lo más especial de ello, fue que las muchachas oficiaron la misa.

Diario de sucesos de México • 213

El día 1Q de este mes hubo toros y carreras también no muy malas. Y el día 2, fue el segundo de iluminación en la ciudad de México en las mismas partes que el 31 de enero.

Los días 3 y 4 de febrero hubo también toros y carreras.

El día 6 del mismo en los toros, hubo un don Pedro de palo y sortija, y una india en un monte encebado con dos palanganas de plata en sus manos, pero estuvo tan alto que nadie pudo quitarle nada.

El día 7 de febrero, fue el último de iluminación en esta ciudad. Y este día en la iglesia de San Francisco hicieron los gallegos una gran función en obsequio del rey Carlos IV.

El día 13 de febrero de 1790 en México, hubo en el Coliseo un baile que hicieron los caballeros que entraron con boleto de forma, que entraron sólo caballeros y señoras. Pero no se ha visto en México otro semejante, pues llevaron médico y cirujano y botica y padre capellán, por si había algún accidente, y sin embargo mal parió una de las señoras y la llevaron en silla de manos a su casa. Duró el baile toda la noche y se puso un tablado dentro de el patio, y se iluminó con veinticuatro candiles de plata y muchas pantallas de plata, y fue siendo virrey el señor conde de Revillagigedo. Este mismo día 13, salió el señor virrey para la visita del desagüe de Huehuetoca y volvió el día 17 del mismo.

En el mismo día 13 en México, en el Real Palacio, se bajaron por orden del señor virrey las imágenes que estaban en el Cuerpo de Guardia de los Alabarderos, que eran una imagen de Nuestra Señora de Guadalupe que esa misma tarde se llevó al convento de las madres capuchinas de México, una medalla con la Virgen de la Concepción y la Santísima Trinidad y Señor San José, y Señor San Joaquín y Señora Santa Ana, y un lienzo con un Señor Crucificado, la Virgen y San Juan y la Magdalena y dos ángeles San Miguel y San Rafael, y el día 14 del mismo las llevaron al convento de las madres capuchinas de Nuestra Señora de Guadalupe, que las dieron de limosna la Compañía de Alabarderos, y fue siendo capitán de esta compañía don Mariano Velasco, y alférez don Juan Alberto Badamés, y cabos don Pedro Palacios, yo José Gómez y don Antonio Toribio Parra.

El día 15 de febrero de 1790 en México, entró el Correo de España y en éste le vino a don Antonio Bonilla, el grado de coronel, y otros varios empleos a varios sujetos.
[truncated: 241,929 more chars]
