# Supplementary material for: A Methodological Framework for the Use of AI Tools in Automated Workflows for Generating Validated and Structured Historical Datasets
Source: Research Square preprint supplement (doi:10.21203/rs.3.rs-7943432/v1), 2025-11-17
Supplement: Supplementary file 21 [file Diario_de_Juan_Vildosola_GT.docx]

%p1–Vildosola–2025–10–15%

Año de 1857

enero

J.1. Hoy se ha publicado para la administración del departamento, que deben regir las Bases Orgánicas, publicadas, en el año de 1843, y como son conformes al plan de Iguala, que es el que secundarán en los demás puntos del departamento, se ha hecho circular. Hoy también hace renuncia el señor general Calvo, de general en jefe de las fuerzas pronunciadas en esta capital, el día 10 de diciembre del año pasado, por hallarse enfermo, y encarga al señor don Tomás Mejía lo sustituya; el cual, en el acto, pasa revista a las fuerzas, y queda general en jefe de dichas fuerzas. En este mismo día, en la tarde, por orden del señor general Mejía, va una fuerza al mando del señor coronel Florán, al Consulado Británico, para extraer la cantidad de $240,000 que se hallaban depositados en él, y que, por no querer prestarlos, eran sacados por fuerza cuyo dinero no lo podían prestar por ser de varios individuos, pues que es, el que sale en la conducta, la cual había de salir muy pronto. En este mismo día, se dice que el señor Parrodi, se acerca a San Luis, y que las fuerzas de Sánchez no pasan del Jaral. En la noche de este día, pusieron presos a los Señores Paz y Torices, también tenían orden de presar al señor Porras, pero él, teniendo aviso, se escondió. Hoy hubo jubileo en el Sagrario, y villa de Santiago.

V.2. Hoy después de mediar varias comunicaciones entre el señor gobernador y el Cónsul Británico, (el señor don Jorge Chabot) éste queda, se quejará al Consulado de México; además, en las comunicaciones que da el Señor Gobernador, dice, que dicho dinero, será pagado por el señor don Desiderio Samaniego. Hoy salieron libres los señores Paz y Torices.

S.3. Hoy hubo jubileo en el Convento de San Agustín. Hoy por favor del señor don Darío Reyes, consiguió al señor Porras, el que no se le presara.

D.4. Hoy hubo jubileo en el Sagrario.

L.5. Hoy salió de la Hacienda de la Pila, las tropas que forman la división expedicionaria, sobre Guanajuato y demás puntos de la República. En este día, fue nombrado el señor don Francisco Sánchez, jefe de las fuerzas pronunciadas.

J.8. Hoy se sabe que las fuerzas que manda el señor Parrodi no pasan de 3000 hombres de los cuales mitad es de línea, y los restantes de la Guardia Nacional, no teniendo ningún manejo de armas, porque son unos infelices sacados por la fuerza. Hoy hubo jubileo en el Convento de San Francisco, y villa de Tequisquiapan. Hoy en la tarde, tiraron en esquina de San Agustín un cañonazo con solo taco, por haber divisado pasar por la

%p2–Vildosola–2025–10–15%

Garita de México un piquete de Caballería.

S.10. Hoy en la noche se dice que el señor general don Anastasio Parrodi, se acerca a esta capital con las fuerzas que trae a su mando, y por este aviso, empieza el señor don Juan Othón a preparar su marcha.

D.11. Hoy cerca de las dos de la mañana, marcha el señor Othón en compañía de varios señores que tenían parte en el pronunciamiento pasado, y de la poca tropa que había quedado, llevan doce todo el armamento, y parque, no dejando únicamente, más que dos piezas de artillería de bastante calibre, clavadas, y embaladas, de modo que no pudieron servir. En este mismo día viendo el estado que guardaba la población, escapándose de un motín, por haber quedado sin ninguna autoridad ni ningún Soldado; pues la cárcel, los celadores estaban de Guardia, viendo asimismo todas las cosas, se dispuso el que se reuniera el consejo que estaba cuando estaba de gobernador el señor licenciado don José María Aguirre, para que, por la votación de consejo, se nombrara a un gobernador interino, el cual por mayoría de votos, salió electo el señor licenciado don Crescencio María Gordoa, presidente del Consejo; el cual puso en el mismo un extraordinario al señor gobernador el señor Aguirre, el cual se hallará en Aguascalientes. En este mismo día se volvió a encargar de la Prefectura, el señor don José María Aranda y se volvió a reunir la Guardia Nacional, para defender la Cárcel y poner guardias en Palacio. Hoy se fue para México el señor Don Guillermo Rode.

L.12. Hoy en la mañana salió como es de costumbre, el Cabildo Eclesiástico en San Pedro, a dar gracias a la Iglesia del Santuario de María Señora de Guadalupe, rezando el rosario todo el camino, y habiendo guardado su Majestad, expuesto todo el día, en dicha Iglesia del Santuario. En este día, se sigue con bastante empeño el reunir algún parque, como también armas, pues ninguna había dejado el señor Othón; más que dos piezas de artillería, clavadas, las cuales, en la noche, las desclavaron y las dejaron servibles, como también hicieron bastante parque, por decirse que el señor don Juan Othón, en compañía del señor Alfaro volvía a tomar la plaza. En la noche de este día, se sacramento la señora doña Maríana Dávalos.

M.13. Hoy en la mañana se dispuso que salieran más fuerzas al mando del señor Bustamante y Porras, a la villa de los Pozos, a atacar las fuerzas del señor Othón que se aproxima van a tomar la plaza, cuyas fuerzas que de aquí salieron, no fue necesario que llegaran a dicha villa, pues se encontraron en el camino, en donde ambos hicieron fuego y se trajeron prisioneros a los señor don Nicanor Lobo y el señor Sierra; al señor Sierra, lo mataron cuando llegaron a San Luis; y al señor Lobo, tal vez le hubiera sucedido lo mismo, si no es porque a ese tiempo se presentó el señor Othón entrando por

%p3–Vildosola–2025–10–15%

casi todas las bocacalles de la plaza en compañía del señor don José María Alfaro y de las fuerzas que traía a su mando no siendo suficientes para resistir los de la Guardia Nacional, los cuales por orden del señor gobernador de los señores Bustamante y Porras, fueron colocados en varias alturas de la plaza como son el Palacio, el Bazar, la Catedral, y La Lonja habiendo en cada altura cerca de seis, a siete hombres, por ser poca la fuerza y poco el parque que tenían, además, había centinelas en casi todas las esquinas de la plaza, y las dos piezas de artillería que el señor Othón había dejado clavadas, estaban ya en disposición de hacer fuego, más con todo esto, estas fuerzas no fueron suficientes para resistir a las del señor Othón, pues este, casi habiendo acabado de entrar el señor Bustamante y el señor Porras, con los soldados que trajeron prisioneros a los señores Lobo y Sierra, se presenta en la plaza en compañía del señor Alfaro y de las fuerzas que traía su mando, siendo las cuatro de la mañana dadas, entran, las cuales haciendo un fuego muy vivo y sosteniendo el fuego cosa de media hora, logran entrar a la plaza, dejándose también ver el valor de los nacionales, pues se defendieron muy bien; solo los centinelas que estaban en las esquinas, viéndose solos echaron a correr; y el señor licenciado don Luis Días de León capitán de los nacionales dicen se escondió en la Tercena en un costal de tabaco, los señores Bustamante y Porras viéndose perdidos tomó cada uno distinto camino, el señor gobernador don Crescencio María Gordoa como vive en la plaza, temeroso de que le hicieran algo o lo presaran, no teniendo donde esconderse consiguió un vestido de eclesiástico, y de este modo se disfrazó para poder salir de su casa para esconderse. En el mismo día cerca de las ocho de la mañana, pasaron varios oficiales a caballo corriendo con algunos soldados dando vivas también mandaron repicar en el Convento de San Francisco habiendo repicado con la campana del reloj también cerca de las ocho de la mañana que estaba ya la plaza en quietud, dispuso el Señor Othón y el señor Alfaro se hicieran fortines, tomando para esto a muchos infelices y sirvientes como también para levantar los heridos que había tirados, pues según dicen en la media hora que duro el tiroteo, hubo entre unos y otros, y entre muertos y heridos, cosa de 100 hombres. Hoy a la madrugada murió la señora doña Maríana Dávalos.

Mes. 14. Siguen haciendo las fortificaciones con bastante precipitación, y unas por decirse que el señor Aguirre viene con la Guardia Nacional de Aguascalientes, a las órdenes del señor coronel Don J.L.Rivera, por lo cual se provee haya un largo sitio y por este temor, salen hoy muchas familias fuera de la capital. Hoy se enterró en la tercera orden la señora doña Maríana Dávalos.

J.15. Hoy cosa de las nueve de la mañana, estando en las misas cantadas de Nuevo Año por ser jueves, y en un triduo que se estaba rezando en el santuario, cuando fue oído

%p4–Vildosola–2025–10–15%

un toque como a quemazón que se hacía con mucha precipitación en el Santuario, mucho corrieron para ver que era, y otros fueron a la plaza para estar seguros en caso de un motín, a poco rato se circula la noticia, que es el señor Aguirre que venía con la Guardia Nacional de Aguascalientes, y que para aviso de los de la plaza era el toque, pues el señor Othón tenía unos para que avisasen en caso de ver fuerzas por los caminos, luego que se supo esto, el comercio se cerró y toda la gente se recogió a sus casas, cerca de las once de la mañana, paso el señor don Lorenzo que venía en clase de parlamentario, el cual fue recibido en la plaza, y después de haber salido, de la plaza, y de habérsele quedado el corneta con quien fue, le repicaron como por burla, habiendo vuelto él solo a la casa del señor don José María Coca que esta junto del Convento de la Merced, en cuya casa estaba el señor Aguirre; y las fuerzas de Aguascalientes, formadas en la Plazuela; la contestación del parlamento que el señor Vega llevo, fue que había dicho el señor Othón, que por ningún motivo dejaría la plaza, en este día hubo unos cuantos tiros, siendo más en la noche que fue cuando se mudaron de la Plazuela de la Merced, al Convento de San Francisco, durmiendo esta noche el señor Aguirre en casa de las señoras Cadenas. Hoy todavía se siguen sabiendo fuera muchas familias. Hoy se declara la población en estado de sitio.

V.16. Hoy empiezan a hacerse fuego tanto los de adentro, como los de fuera, y en esta noche se pasó un piquete de las fuerzas del señor Aguirre a tomar el punto del Convento de San Agustín, y como en esta misma noche venían a tomar dicho punto las fuerzas del señor Othón habiendo sido el motivo por lo que hubo un gran tiroteo; habiendo tomado dicho punto las fuerzas del señor Aguirre. Hoy mataron al señor Don Archibaldo Estaines. También hoy se pasó el señor Aguirre de las señoras Cadenas, al Convento de San Francisco.

S.19. En este día ya son más continuos los fuegos de unos y otros, haciéndolo desde las alturas que tenían siendo de parte de los de adentro, los puntos siguientes: la Catedral, el Carmen, San Juan de Dios, Colegio de Niñas, la Compañía y las alturas del Obispado, la casa de Moneda, la casa del señor Toranzo, y los altos del señor don Diego Falgar y los de afuera, tenían el Convento de San Francisco, que era el Cuartel General comunicándose por la puerta del Campo, San Agustín habiendo centinelas en todas las bocacalles de portillo á portillo, también tenían el punto del Hospicio, y todas las orillas. En este día, el señor don Luis Legorreta, tomó preso al señor don Genaro Dávalos en la Garita de México, yendo con su familia para el Pozo de luna, después de haberlo agarrado el señor Legorreta, se lo entrego al señor capitán de la Guardia,

%p5–Vildosola–2025–10–15%

don Luis Días de León el cual fue el que lo llevo al Convento de San Francisco donde estuvo preso, en compañía de don Felipe Cortez, al cual lo agarraron por andar viendo una casa y lo condujeron preso al Convento de San Francisco, en donde lo pusieron en la cárcel donde estaba el señor Dávalos, estando ambos incomunicados y con tres centinelas de vistas.

D.18. Hoy viniendo el señor don Manuel Escontría de su hacienda, por su familia: al llegar a la capital, fue detenido en la Garita, y traído preso al Convento de San Francisco, habiéndole quitado en la misma Garita, el caballo en que venía y una espada: poniéndolo preso en compañía de los señores Dávalos y Cortés. En este mismo día, habiendo hecho el señor don Francisco Estrada, empeños con el señor Aguirre para que los señores Cortés, Dávalos y Escontría que estaban en clase de presos en el Convento de San Francisco saliesen, no habiéndolo conseguido, logró el que la prisión la pasasen dichos señores en su casa bajo su responsabilidad; habiendo pues salido dichos señores de San Francisco a la casa del señor Estrada, el señor Escontría y el señor Cortés, le pidieron permiso al señor Estrada para irse a la casa del señor don Paulo Verástegui, cuyo permiso fue dado por el señor Estrada habiéndose ido ambos.

L.19. En este día murió la señora doña Alejandra Rondano, habiendo sido enterrada en el campo-Santo de San Miguelito.

M.20. En la noche de este día salió un piquete de los soldados de la plaza, a tomar el punto de San Agustín, habiendo habido muchos tiros: y no habiendo ya podido resistir los de la plaza, se volvieron sin haber tomado ningún punto. Después de esto, los soldados de fuera, creyendo que el ataque era por querer sacar los presos que estaban en la casa del señor Verástegui, empezaron a balearla; pero pararon el fuego muy pronto.

Mes.21. En este día nos salimos para la casa de mi tía Atanasia (será de las dos de la tarde) por no dejar pasar al mozo con comestible, en esta casa estaba mi tía Atanasia, con las dos niñas Duques, doña Margarita y doña Asunción, la familia del señor Estrada y el señor don Manuel B. Castillo, con su señora; además de estas personas, estaba también el señor Dávalos que estaba como en clase de preso. En la tarde volvió a salir una fuerza de los de la plaza, para tomar el punto de San Agustín, la cual entro hasta cerca de la bocacalle de la Cruz, queda para San Francisco; habiendo corrido los centinelas de las bocacalles de la Cruz San Francisco y la Concepción a refugiarse al cuartel por estar muy aislados en las esquinas; luego que se acercaban más las fuerzas de la plaza, empezaron a hacer fuego para San Francisco y San Agustín, contestándoles también desde dichos puntos: y no habiendo podido tomar ningún punto, se volvieron para la plaza.

%p6–Vildosola–2025–10–15%

J.22. En este día habiendo sabido el señor Aguirre lo que el día de ayer había pasado en la casa en del señor Verástegui, dio orden al señor Estrada, para que hiciera volver a su casa a los señores Cortés y Escontría, lo cual al momento fue obedecido, haciéndose venido dichos señores a la casa del señor Estrada. Hoy murió el señor don Dionicio Palomo.

Mes.28. Hoy salió para la carpintería del Señor Gollena, el Señor Licenciado Don Tirso Vejo, habiéndose ido el mismo día, para la villa de la soledad de los Ranchos.

S.31. Hoy sigue el fuego entre ambos, habiendo bastantes heridos: cesando un poco los días domingo, en que había Misa en el Convento de San Francisco para los Soldados de ahí, y para los de afuera en la Plaza. también en el Convento de la Merced había Misa por ser la única Iglesia del centro, que estaba sin tropa pues iba alguna gente. En las villas también había Misa, pero sin llamarlas.

Febrero

S.1. En este día fue la Señor Rondano con una niña, a la casa de mi tía Atanasia, por no poder aguantar en su casa las muchas balas que caían.

L.2. Hoy pario doña Elena esposa del señor don Pascual García, asistiéndola el señor don Francisco Estrada, pues era el único médico que estaba fuera. También a los heridos que había en señor Francisco, el los curaba.

M.3. Hoy por empeños que hizo el Señor Estrada con el señor Aguirre, consiguió el señor don Genaro Dávalos, licencia para ir a la Hacienda del Pozo de Luna, a ver a su familia con la condición, de que se si triunfaba el partido liberal, volvieron a presentarse al señor Aguirre; y si no triunfaba dicho partido, tomara el camino que le pereciere; esta licencia también la consiguió el Señor Estrada para los otros Señores que estaban en clase de presos, el señor Escontría, y el señor Cortés, para que pudieran también ir a ver a sus familias; pero estos señores no quisieron, solamente el señor Dávalos, se fue en el mismo día.

J.5. En este día murió la Madre del padre Fray Francisco Orozco, guardián del Convento de San Francisco.

S.7. Hoy por extraordinario recibió el señor Aguirre la noticia de que las fuerzas que mandaba Sánchez y Osollo, después de 16 días de sitio, en el Cerro de la Magdalena, tomaron el camino de Guanajuato en donde fueron derrotadas dichas fuerzas, por las del señor Parrodi, habiendo en esta lucha el Osollo, un brazo que le llevo una bala de Cañón.

%p7–Vildosola–2025–10–15%

D.8. En este día se le avisa al señor Othón por medio de un parlamentario, que el señor Parrodi derroto las fuerzas que traían a su mando, los señores Sánchez y Osollo, para la cual enseñaron al Señor Othón, el comunicado que el señor Parrodi había mandado el Señor Aguirre; lo cual no en el señor Othón, y contesta que de ninguna manera se rinde; repicando tanto los de la Plaza, como los de fuera terminando con agonías y dobles porque cada uno creía lo que le parecía.

Mes.11. Hoy entre 10 y 11 de la mañana hay sus repiques por los de fuera, contestando a poco los de adentro, y continuando ambos con dobles: acabados dichos repiques, tocan parlamento los de afuera, el cual fue tocado en la bocacalle de la Cruz que mira al portillo del costado, del Convento de San Francisco; dicho parlamento fue admitido por los de a dentro, pasa el parlamentario vestido de encarnado, el cual es mandado por el señor Vidaurri que había llegado, y estaba en la villa de Santiago en donde había puesto su cuartel general: y por cuyo motivo habían repicado en el Convento de San Francisco desde que divisaron sus fuerzas, por lo que el repique de los de la Plaza no fue más que porque no creerían que venía el señor Vidaurri; y repicaron por burla: en fin, entra el parlamentario a la plaza después de haber tocado parlamento por la bocacalle de la Cruz, habiéndole primero tocado por la bocacalle de la Compañía, pues estaba más cerca de Santiago, pero como por dicho punto no fue oído el parlamento, lo tocaron por segunda vez por donde llevo dicho, luego que el parlamentario entro a la plaza, se reunió en las esquinas mucha gente esperando que volviera el parlamentario, el cual pasado una hora volvió, y dio la noticia de que los señores Othón y Alfaro, contestaban que no se rendían, pero que sin embargo rendirían a los demás jefes, y que a las 3 de la misma tarde resolverían. En este mismo día en que el señor Vidaurri llego a la villa de Santiago, los indios no querían en aquella villa al Padre Fray Antonio Mata, y por cuya razón lo llevaban fuera: pero viendo esto el señor Vidaurri cuando, que lo quitaran a los indios, lo cual vio el señor don Juan Bustamante, habiendo amenazado a los indios. Además con respecto a las resultas del parlamento, se esperaba que durante el espacio que los señores de adentro habían puesto para resolver si se rendían o no, habían de cesar los fuegos, pero no fue así, porque cerca de las 2 de la tarde empezó un fuego constante y vivo por los puntos de la Compañía, se supo, que dicho tiroteo, fue, porque la plebe que estaba ganosa de que hubiese un saqueo, empezaran a insultar a los soldados del señor Vidaurri; estos, se empezaron a enardecer y sin orden del señor Vidaurri se vinieron a atacar los puntos de la Compañía, Colegio de Niñas, y San Juan de Dios, tomando

%p8–Vildosola–2025–10–15%

al mismo tiempo dichos puntos por estar defendidos con muy pocas fuerzas, a las 3 de la tarde que era la hora en que había de volver el parlamentario a la plaza, para ver que resolvían, fue, habiendo tocado antes parlamento; contestando los de la plaza, que no se rendían por ninguna manera, además de ver que el tiroteo se avivaba más por el rumbo de San Juan de Dios, en esta misma hora, ínterin estaban en el tiroteo muchas de las casas que estaban en ese rumbo, fueron saqueadas entre ellas, la casa del señor don Nicanor Lobo, y su cerería, la casa del señor don Joaquín Cabral, la cerería del frente de la Capilla del Rosario, la casa del Padre Téllez, al cual le robaron 300 pesos en efectivo, las que había escondido en la cornisa de una de las puertas de la casa, la casa del señor Briontt el cual fue herido de un brazo por un balazo que le dieron por reusar el entregar algunas alhajas, las cuales, viendo su señora lo que le había su cedido, al momento las entrego sacándolas de un caño en que las tenía escondidas el señor don Francisco Cabrera también fue herido de la frente con la culata de un fusil y tal vez lo hubieran matado sin su señora no se les inca, al señor don Joaquín Cabrera también después de saquearle su casa, le pedían dinero apuntándole para que se las entregara, hasta que viéndose un poco libre, hecho a correr a refugiarse un fortín. En fin, otras varias casas fueron saqueadas, y otras que no pudieron por ser donde con más fuerza estaba el tiroteo, en esta misma hora se quemó un Jacal. Con respeto a la toma del punto del Convento del Carmen, siguen tiroteándose habiendo algunos muertos y heridos también para poder atacar el punto del Carmen, fueron a tocar la casa del señor don Ramón Saavedra, el cual al abrírselas recibió un balazo en la cara a boca de jaro, habiéndole entrado la bala por fortuna, entre cuero y carne, subidos ya los soldados en esta altura, y habiendo bastantes en la Plazuela hacen fuego al Carmen muy vivo mientras esto pasaba por este rumbo muchos de los Soldados que estaban en la casa de moneda, dieron muestras de querer pasarse a los de San Francisco, lo que algunos hicieron descolgándose con algún riesgo de que les pegaran un tiro pues estaban haciendo fuego los de la torre de San Francisco en fin un oficial de los de San Francisco, corrió a darles auxilio llevándoles reatas para que pudieran descolgarse, pero este, fue herido por uno de los de su cuerpo, y ya no se supo si se pasaron o no. Cerca de la oración los soldados que había en la altura del Carmen, habiéndoseles acabado el parque tocaron una esquila en seña de que llevasen parque y doblasen la Guardia pues apenas 30 hombres, eran los que había en dicho puesto más cuando oyeron la esquila doblaron la guardia y se prepararon para el ataque.

%p9–Vildosola–2025–10–15%

La noche estaba en gran silencio, y se esperaba un motín pues no se oía ni correr la voz los centinelas y la razón era que, como estaban preparándose para el ataque a la plaza, lo cual se disponía del modo siguiente: y es que, las fuerzas del señor Vidaurri atacara a las órdenes del señor coronel Aramburri, por los puntos de la Cruz y la Moneda, otra fuerza al mando del señor coronel Zuazua, también debían de atacar; y las de Aguascalientes, que son los que estaban en San Francisco al mando del señor coronel Longinos, debían de repartirse para guardar la población de un motín, este es el plan dispuesto para la media noche dar el ataque, de cuyo plan, no fue necesario hacer uso, porque cerca de las 11 de la noche, después de haber mandado el señor Othón reunir a la plaza la que estaba en el Carmen, y los que estaban en la altura del Obispado y habiéndoles dado su libertad a las soldados, y escondidos los cabecillas, tocaron parlamento, el cual lo tuvieron que repetir por no haber sido oído el primero, en cuyo parlamento trajeron un pliego que mandaba el señor Othón, firmado por el general Lama en que decía, podían disponer de la plaza a la 2 de la mañana, y que los hacia el entregarla, por libertad a la población de un motín.

J.12. Hoy a las 2 de la mañana hubo un pequeño repique en Catedral. Al amanecer luego se conoció todo lo que había pasado y más al ver quitadas las centinelas de las esquinas y la mucha gente que se reunía en las calles viendo los destrozos que habían hecho las balas. En este día se esperaba un repique general, pero no hubo nada por temor de que la plebe no se alarmara para saquear, por cuya razón, mucha gente estaba temerosa de salir. En la misma mañana le pasaron al señor Estrada una comunicación del señor Chaves (director de la Casa de Moneda) para que hubiera una junta para ver lo que se había perdido. En la misma mañana les dio licencia el Señor Estrada, a los presos para que fueran a sus casas con la condición de presentarse al día siguiente, para presentarlos al Señor Aguirre, despidiéndose de la casa los señores Cortés y Escontría. Hoy fuimos a casa papá y yo para disponerla para irnos el día siguiente, también en esta mañana fue el señor Estrada a la plaza a abrir la casa del señor don Pascual García, para que la catearan, favor que el señor García pidió al señor Estrada para que no se le perdiera algo con el achaque del cateo, luego que el Señor Estrada acabo de serrar la casa no lo dejaba salir el centinela porque decía había orden de no dejar entrar ni salir a nadie sin orden del señor Bustamante, que estaba en el Bazar, al cual no le pudo hablar el señor Estrada, por estar ocupado. En fin, después de 1000 batallas hubo de

%p10–Vildosola–2025–10–15%

salir el señor Estrada saliendo por encima del cañón, pues era la única salida que había. Además de la casa del señor García, catearon varias casas entre ellas todas las inmediatas a la plaza, la del señor Paz, la del señor licenciado Valdez, cuya casa la deslozaron para atrancar mejor la puerta, los oficiales que se hallaban escondidos allí también otras casas catearon lo que hicieron para, ver si había oficiales de los de la plaza escondidos y particularmente los señores Othón y Alfaro, llevándose presos a Palacio todos los oficiales que encontraban, y también a otros entre los que llevaron, al Padre don Luis Arias, al hijo del señor Licenciado don Antonio E. Valdez, y a otros varios pero estos señores salieron libres hoy mismo. El general Lama no teniendo modo de esconderse se escapó habiendo formado una blusa con un zagalejo, y su rifle en la mano y así pudo salirse entre los soldados del señor Vidaurri, pues de este modo andaban vestidos. El señor Alcántara también pudo escaparse habiéndose puesto tras una cortina. En fin, ya los que se habían escapado ya no eran buscados pues a quien buscaban con empeño era a los señores Othón y Alfaro a los que buscaban hasta en las linternillas de las torres habiendo antes mandado rodear la ciudad para que no pudieran irse. Toda la mañana y casi toda la tarde de hoy anduvieron buscándolos hasta que cerca de las 6 de la tarde, fueron hallados en la Iglesia del Colegio de Niñas debajo del cajón que forma el frontal del Altar mayor de dicha iglesia, y tal vez no los hubieran encontrado, pues según dicen una persona fue la que dio aviso de que ahí estaban escondidos, la misma que les dio el consejo de que ahí se escondieran. Luego que dichos señores Othón y Alfaro fueron sacados los condujeron presos a palacio en donde estaban presos los demás oficiales, a los que a poco rato los separaron. En la noche le llevaron un papel al señor licenciado don Manuel B. Castillo para que firmara y asistiera a palacio, lo primero hizo, pero lo Segúndo no por no saber el motivo de dicha junta lo cual después se supo, y era para formar el Ayuntamiento. Salen hoy varias patrullas de caballería, é infantería, para defender la población.

V.13. Hoy se presentó el señor Cortés al señor Estrada para que lo presentara al señor Aguirre (Gobernador del Estrado) no habiendo podido ir el señor Escontría como quedo por estar un poco enfermo lo que mando avisar con el señor don Mateo Rada y por lo tanto le dijo el señor Estrada al señor Cortés se presentara hasta el día siguiente. En la tarde nos fuimos a casa despidiéndonos de todos los que había en la casa de mi tía Atanasia. En este día ya se sonaron las campanas dando los toques de costumbre, y en la noche se encendieron los alumbrados poniéndose los Serenos en sus puntos respectivos; y las patrullas si

%p11–Vildosola–2025–10–15%

guen rondando la población.

S.14. Sigue la tranquilidad pública, habiendo ya misas y los toques de los canónigos.

D.15. Hoy empiezan a llegar las familias que por temor se habían salido fuera. En la tarde hubo función de Toros en el Montecillo.

L.16. Hoy ha sido nombrado Administrador de rentas de esta capital el señor don José Antonio Barragán.

M.17. Hoy recibió el empleo del estado, el señor don Santiago Ramos.

Mes.18. En este día es nombrado el señor licenciado Escobar, Juez 3° de letras de esta capital.

V.20. En este día dispuso el señor Vidaurri se dijeron una misa a María Señora de Guadalupe en su Santuario, en Acción de Gracias habiendo asistido varias personas, las autoridades, y la tropa. El sermón lo predico el M.R.P.F. Manuel Gonzáles. Provincial del Convento de San Francisco de esta capital.

D.22. En este día se le hizo al señor Vidaurri asistiera a la casa del Señor don Pilar Bustamante, donde se le dio una comida habiendo habido música y tocado un himno dedicado al señor don Santiago Vidaurri, compuesto por el señor don Romualdo Castillo, a la mesa asistieron varias personas. En este día se empezaron las máscaras, siendo muy pocas las personas que se vistieron. En la noche hubo bailes en el Teatro.

L.23. En la noche de este día baile en el Teatro.

M.24. En la noche volvió a haber baile en el Teatro.

Marzo.

D.1. Hoy empezaron los ejercicios de la cuaresma que anualmente hace el presbítero don Ambrosio Pereda, habiendo sido en el Convento del Carmen. En la noche se dio un baile al señor Vidaurri en el Teatro habiendo sido dicho baile de máscaras. También hubo en esta misma noche baile en la Sociedad Potosina (Conocida con el nombre de la Lonja). Hoy hubo sermón en Catedral. También hubo jubileo en el Sagrario y Villa de Santiago.

M.3. Hoy Jubileo en el Convento de San Agustín.

Mes.4. Hoy hubo sermón en el Convento de San Agustín. En la noche de este día dio el señor Vidaurri un gran baile en el teatro, al que asistió bastante gente. En este día hubo órdenes de epístola en Catedral. También hubo jubileo en el Sagrario. En la noche sermón en Tercera Orden.

%p12–Vildosola–2025–10–15%

V.6. En la noche de este día mataron a don Regino Colorado las patrullas que andaban de los Soldados de Nuevo León, el motivo fue que, yendo dicho señor de ronda, le dieron el quién viva y no habiendo respondido, le tiraron.

S.7. En este día le dieron un día de campo al señor Vidaurri.

D.8. En este día hubo orden de Evangelio en el Obispado. En este día fue nombrado comandante general de San Luis Potosí, el señor don Mariano Morett.

M.10. En este día salieron para su estado las fuerzas de Nuevo León, al mando de los Señores Zuazua y Aramburri.

J.12. Hoy jubileo en el Santuario de Guadalupe. Hoy salió el señor Vidaurri para Nuevo León despidiéndose de los potosinos, por medio de una proclama. En la tarde llegó el señor Morett con el 3° Regimiento de Caballería. Hoy se fugó del Convento del Carmen en donde se hallaba preso el Señor Alfaro.

V.13. Hoy pasaron al Señor Othón que se hallaba preso en el Convento del Carmen, lo pasaron al Cuartel. En la noche hubo sermón en Tercera Orden, habiendo habido por la tarde en el Convento de San Francisco.

D.15. Hoy se establece un tercer correo para México. También por limosna de algunos y algunas devoto-as [sic] de la Purísima, se estableció un jubileo en el Colegio de Niñas para todos los días 15 del mes en honor de dicha imagen. Órdenes de Pro.

L.16. Jubileo en el Convento de Carmen.

J.19. Hoy Jubileo en el Convento de San Agustín y en el Sagrario. En este día cantó misa el Padre don Pedro Gaitán en el Convento de San Agustín, habido predicado el presbítero don Telésforo Macías. En el mismo día cantó misa en la Villa de Santiago el R.P.F. Buenaventura Méndez.

V.20. Hoy en sermón San Francisco y en la noche Tercera Orden. En este día llegó preso a esta capital el señor don Manuel Calvo, el cual es puesto preso en el Convento de San Francisco. También se sabe que el señor Alfaro es aprendido en la hacienda de Vanegas y que antes de conducirlo para acá se les fugó. En este día se le da su casa por cárcel al señor don Francisco Sánchez por hallarse enfermo.

D.22. Hoy cantó misa en la Villa del Montecillo el P. Arriaga habiendo predicado el P. don Pablo Anda.

M.24. En este día hay jubilo en el Convento de la Merced.

Mes.25. Hoy sermón en el Convento de San Agustín.

%p13–Vildosola–2025–10–15%

D.29. Hoy se pasaron los soldados que componen la Guardia Nacional de Aguascalientes, que estaban en el Convento de San Francisco, se pasaron al Cuartel del Carmen. En este día se publicó la nueva constitución habiendo muy poca tropa para su publicación, y unos cuantos regidores. Los repiques que se dieron mientras salía el bando, fueron muy tristes pues en varias Iglesias no quisieron replicar. En la noche salió un carro que llevaba un cartel en el que estaban escritas palabras ¡¡¡Viva la religión verdadera!!! [sic] Por lo que el periódico pregunta si acaso la religión que se profesó no es la única verdadera la Católica Apostólica Romana.

L.30. En este día se hizo jurar la nueva constitución, a todos los empleados. La cual no es jurada por los empleados siguientes: don José María Sousa, vocal del Excelentísimo Consejo - licenciado don Guadalupe de los Reyes - presidente del Supremo Tribunal de Justicia - licenciado don Luis Guzmán – magistrado - licenciado don Julio Gutiérrez Castillo – magistrado - licenciado don Tirso Vejo – magistrado - licenciado don Juan Ortega - fiscal nombrado por el Tribunal - licenciado don Marcelino Castro - secretario de la Sala del Tribunal - licenciado don Manuel B. Castillo - Defensor de Pobres - don Jesús Ávila - escribiente del Tribunal - don Antonio Valdés - escribiente del Tribunal - licenciado don Antonio E. Valdés - don Francisco Estrada - contador de la Casa de Moneda - don Mariano Cataño - ensayador de la Casa de Moneda - don Victoriano Galindo - fiel de la Casa de Moneda - don Luis Márquez - escribiente de la Casa de Moneda - don Tomás O. de Parada - director del Hospicio de pobres de San Juan de Dios - don Francisco Sánchez Lara - vocal de la junta directiva - don Antonio R. Fernández - vocal de la junta directiva - don J. Oviedo - escribiente de la Aduana - don Ricardo Ulibarri - escribiente de la Aduana - don Jacobo Ulibarri - escribiente de la Aduana - don Rafael Mier - guarda de garita - don Juan Rocha - guarda de garita - don Bonifacio Arlegui - escribiente auxiliar de la Prefectura - don Francisco Camacho - ensayador de cajas prestó el juramento y en el mismo día se retractó. En este día se hace saber por medio de una circular que dio el Señor Arzobispo de México, la cual han obedecido todos los señores obispos, que, todos aquellos que han jurado la Constitución de 1857 no podrán ser absueltos cuando lleguen al sagrado Tribunal de la confesión, si no, es que se retracten públicamente.

M.31. En este día salió de la Imprenta de Dávalos un nuevo periódico: "La Razón". Siendo los redactores del periódico, los señores licenciados don José Castillo, y Don Miguel Laso. En este día, parió la señora doña Susana Gutiérrez Castillo, esposa de don Jacobo Urtetegui. En este día fue nombrado prefecto el señor don Martín Gascón, y secretario el señor don Rafael Vega.

%p14–Vildosola–2025–10–15%

Abril

Mes.1. En este día se bautizó a la niña de Susana Gutiérrez Castillo, habiendo sido sus padrinos; de óleos, el M.R.P.F. Francisco de San Rafael, prior del Convento del Carmen, y de manos, el señor don Rafael Urtetegui y la señora doña Ricarda Soberón. Hoy jubileos en el Sagrario y Villa de Santiago.

J.2. En este día se ha encargado del gobierno el señor licenciado don Crescencio María Gordoa, por estar enfermo el señor Aguirre, también en este día no quisieron admitir para el Consejo a los señores licenciado don Miguel Laso, y el señor don Francisco Cabrera que fueron nombrados. En este día, dejó la Prefectura el señor Gascón habiéndola recibido el señor licenciado don Francisco Arriola.

V.3. En este día cantó misa el P. Fonseca en el Convento de San Agustín habiendo sido sus padrinos, el señor licenciado don José María Esparza Pereda y don José María Sousa. También en el Convento de San Francisco cantó misa el P. Robles habiendo sido sus padrinos los señores don Tomás Revilla, y don Silvestre Portillo. En el Convento de San Agustín, predicó el P. don Mariano Saldaña. En este día hubo jubileo en el Convento de San Agustín. Hoy concluyeron los Ejercicios.

S.4. En este día jubileo en el sagrario de Catedral. En la tarde hubo salves en los Conventos del Carmen, San Agustín, y Convento de la Merced. En este día dejo la prefectura el señor Arriola y se encargó de ella el señor Aranda.

D.5. En este día fue publicada y jurada la constitución en las villas. En la tarde llegó de la Villa de los Ranchos el señor del Refugio.

L.6. En este día salió la procesión del señor del Refugio de Catedral.

M.7. En este día salió procesión de Catedral.

Mes.8. Hoy salió procesión de la Villa de San Sebastián, habiendo pasado también por la calle de la Estación.

J.9. Hoy salió procesión de Catedral habiendo salido el señor de la Caída con bastantes luces, de casi todos los que han andado los Ejercicios. En la mañana de este día fueron los sermones de las tres Caídas, habiendo salido nuestro padre Jesús. En la noche salió a visitar los monumentos, el cabildo eclesiástico y civil, habiendo estado los monumentos muy tristes por la pérdida que han tenido los conventos, con motivo de la Ley de Desamortización, únicamente el del Convento de San Agustín que fue el más adornado.

V.10. Hoy salió la posesión del Convento de San Francisco habiendo alumbrado.

%p15–Vildosola–2025–10–15%

mucha gente, á esta proposición se agrega la de la villa de San Miguelito. En la noche hubo sermón de pésame en el Convento de San Agustín habiéndolo predicado el P. Saldaña.

S.11. En este día salió la procesión de los Remedios (capilla perteneciente al Convento de San Francisco) habiendo salido el Santo Entierro para la villa de San Miguelito. Hoy salieron desterrados los señores Dávalos, Guzmán y Vega.

L.13. Hoy en mañana se fue para los Ranchos el Señor del Refugio.

M.14. Hoy se fue para la Villa del Montecillo el Señor de la Misericordia.

J.16. En este día prestó el juramento a la constitución el señor licenciado don Francisco Guzmán para encargarse de la fiscalía. También el señor licenciado don Fortunato Nava lo prestó, para encargarse del juzgado 1° de esta Capital.

Mes.22. En este día murió el señor don Manuel Othón. Hoy volvió ha encargarse del gobierno el señor licenciado don José María Aguirre, habiéndose separado de la secretaria, el señor licenciado don Antonio Ávila. En este día prestó el juramento de la constitución el señor licenciado don Mariano Villalobos (padre) para encargarse del Juzgado 2° de letras de esta ca pital.

J.23. En este día se casó el señor don Francisco Gordoa con la señora doña Margarita Díaz de León los casó el señor cura de Ahualulco (el presbítero don Jesús Gordoa) hermano de don Francisco. Se casaron en el Convento de San Francisco.

S.25. En este día salió letanía de Catedral, habiendo ido al Convento de San Agustín. En el mismo día fue nombrado fiscal de imprenta el señor Don Fermín Miranda. y director del Hospital de Pobres, el señor don Buenaventura Paz.

Mes.29. Hoy tomó posesión del Consejo el señor don Buenaventura Paz.

J.30. En este día tomó posesión de la prefectura el señor don José María Paz y Cardona.

Mayo

V.1. En este día hubo jubileo en el Sagrario y Villa de Santiago. Hoy murió el señor don Ignacio Legorreta.

D.3. Hoy salió tropa (de Caballería e Infantería) para Rioverde por decirse que el señor Mejía se acerca a este punto. En este día hubo jubileo en el convento de San Agustín.

L.4. Jubileo en el Sagrario. En este día quitaron de secretario de la Prefectura al señor don Rafael Vega.

%p16–Vildosola–2025–10–15%

V.8. En la noche de este día llego el batallón de la Guardia Nacional de Guanajuato, el cual batallón trajo dos piezas de Artillería (chicas) habiendo tomado para cuartel al Convento de San Francisco. En este día jubileo en San Francisco y Villa de Tequisquiapan.

S.9. Salves en el Carmen, San Agustín y la Merced. Hoy se nombró fiscal de imprenta al señor don José María Aranda.

L.11. Hoy salió a misa la señora doña Susana Gutiérrez Castillo; habiéndola sacado doña Ricarda Soberón. La misa la dijo el P. Prior del Convento del Carmen.

M.12. Jubileo en el Santuario de Guadalupe.

J.14. En este día llego el señor Dávalos del Valle donde días pasados se le mando para que sufrirse destierro, lo mismo que al señor don Francisco de Sales Guzmán, por haber tenido parte en la revolución, y para que no trabajaran en las elecciones se desterraron. En este mismo día llego de la hacienda del Pozo de Acuña, el Señor Don Evaristo Dávalos el cual llegó en clase de preso por haber sido acusado de que trabajó para que en dicha hacienda no hubiera elecciones. En esta tarde le pegó de bofetadas y patadas el señor don Domingo Urtetegui (Hijo) al señor Magistrado y licenciado don Félix R. Gomes. En la noche murió la esposa del Señor Don José María Arias.

V.15. Jubileo en el Colegio de Niñas. En la noche murió el señor don Juan Gómez.

S.16. Hoy jubileo en el Convento del Carmen. En la tarde salves en San Agustín, el Carmen, y la Merced. En el mismo día llevaron el cadáver del señor don Juan Gómez a la hacienda de la Pila donde se sepultó.

D.17. Hoy llegó el señor don Mariano Vega de la hacienda de Cruces que fue la parte donde se le asignó para su destierro. En la noche hubo la primera función de teatro por la compañía dramática del señor Arias representando la comedia titulada: "Los dos médicos rivales, o una enferma de amor" y de sainete "Los amores andaluces."

L.18. Hoy puso un Palloiorama [sic], el señor don Alfonso Dupon, en la casa del club de Armas. En la noche murió la señora doña F. Rivas tía de las hijas del Señor Rivas. Hoy llegó a esta capital de paso para México el señor don Santiago Vidaurri. Hoy hubo letanía de los santos habiendo salido de Catedral para el Convento de San Francisco.

M.19. Hoy jubileo en el Convento de San Agustín y en el Sagrario. Hoy salió la letanía de Catedral al Convento del Carmen.

Mes.20. Hoy salió para México el señor Vidaurri con una pequeña escolta. En este día hubo letanía habiendo dado vuelta por la plazuela de Catedral.

%p17–Vildosola–2025–10–15%

J.21. En este día trajeron a María Santísima de Guadalupe de su Santuario, para la Iglesia Catedral donde se le va a hacer el novenario que anualmente se le hace. En la noche hubo función de Teatro, representando la comedia titulada: "El preceptor y su discípulo."

V.22. Hoy se casó el señor licenciado don Juan Arriola, con su sobrina doña Merced Arriola.

D.24. En este día hubo jubileo en el Convento de la Merced. En este día parió la señora doña Teresa Lambarri. También en este día se han hecho las elecciones para disputados del Estado, siendo nombrados, los señores siguientes: propietarios don Eulalio Degollado, don Miguel Esparza, licenciado don Crescencio María Gordoa, licenciado don Francisco Villa Nueva, licenciado don Gregorio Vázquez, don Antonio Ladrón de Guevara y don Martín Gascón. Suplentes. Don Alejandro Nieva, don Juan N. Viramontes, don Ramón Francisco Gamarra, don Rafael Vega, don Cipriano Zepeda, don Luis Lozano y don Manuel Oviedo.

L.25. En este día se hicieron las decisiones para Gobernador del Estado, habiendo salido electos con el número de votos que expresan, los señores siguientes; C. don Eulalio Degollado con 146 votos, don Anastasio Parrodi, 94 votos, don Paulo Verástegui, 21, don Crescencio María Gordoa, 37. Las votaciones por el distrito de Rioverde fueron siguientes: don Anastasio Parrodi, 100 votos, don Paulo Verástegui 35. Por Catorce, don Paulo Verástegui 53, don Anastasio Parrodi, 23. Por Tancanhuitz, don Paulo Verástegui, 65, don Anastasio Parrodi, 2, don Manuel Verástegui, 1. Resulta de todas las elecciones. don Anastasio Parrodi con 219 votos don Paulo Verástegui con 243, don Eulalio Degollado con 146. y don Crescencio María Gordoa con 37 votos. Hoy dio un papel al público el señor don Fermín Miranda.

M.26. Hoy entre 6 y 7 de la mañana se ha fugado el señor don Juan Othón del Cuartel del Carmen en que se hallaba preso. En este mismo día bautizo el M.R.P. Guardian del Convento de San Francisco Fray Francisco Orozco, al niño del Señor Larrache al cual le pusieron el nombre Gregorio María Ignacio Larrache, siendo sus padrinos de brazos el señor don Gregorio Lambarri y la señora doña Asunción Larrache.

Mes.27. En este día salió para su estado la Guardia Nacional de Aguascalientes que estaba en el Cuartel del Carmen habiéndose pasado para dicho cuartel, los de la Guardia Nacional de Guanajuato que estaban en el Convento de San Francisco. En este día llego el señor don Julio Galnares con sus dos hijos.

J.28. Hoy se casó don Encarnación Trujillo con doña Paz Calderón. En este día se encargó de la redacción del periódico "La Razón” el señor presbítero don José María Sánchez

%p18–Vildosola–2025–10–15%

Gutiérrez (Catedrático del Seminario)

D.31. En la tarde de este día fue conducida la Santísima Virgen de Guadalupe para su Santuario habiéndola acompañado hasta la Merced todas las comunidades, y después de haber pasado la conservera, se observó que corría la gente para refugiarse a sus casas, cuyo motivo fue por haber habido un pleito en el llano del Santo. En la noche se representó la tercera comedia de abono titulada: “Don Juan Ruiz de Alarcón en la corte de Felipe IV" y de Sainete: "A lo hecho pecho o las travesuras de un sastre".

Junio

L.1. En este día hubo jubileo en el Sagrario. En la noche murió repentinamente el señor don Antonio Rodríguez. También hubo Jubileo en Santiago.

M.2. En la noche se representó la comedia titulada: "Germán el bueno."

Mes.3. Hoy jubileo en el Sagrario y Convento de San Agustín. En este día hubo órdenes en el obispado.

J.4. En este día se acabó de formar la Guardia Nacional para Atacar a los españoles habiéndose apuntado muchos. A dicha Guardia Nacional, le dieron el Cuartel del Carmen y en la tarde pasaron revista con música. Hoy jubileo en el Sagrario. En la noche se representó la comedia titulada: "República conyugal o un pronunciamiento femenil” y de Sainete "El corazón de un bandido."

V.5. Hoy tomó posesión de la contaduría de la casa de Moneda el señor don J. M. Boeta.

S.6. En este día fue quitado del empleo de colector de Billetes de las loterías de Nuestra Señora de Guadalupe y San Carlos, al señor don Manuel Escontría por no haber prestado el juramento a la constitución, quedando de interino y sin necesidad del juramento el señor don Mateo Rada.

D.7. Hoy hubo órdenes de evangelio en el obispado. En este día deja el empleo de administrador de naipes el señor don J.M. Tornel y Bonilla por no haber prestado el juramento a la constitución. En la noche hubo retreta en el Cuartel de los Libres del Potosí (que así le pusieron al cuartel del Carmen, donde estaba la Guardia Nacional.) En este día hubo jubileo en el Sagrario y Convento de San Francisco. En la no che se representó la comedia titulada: "Don Francisco de Quevedo" y de Sainete "Los dos amigos un choque o el dote de medio millón" por la tarde hubo ejercicio con música en el Cuartel del Carmen.

%p19–Vildosola–2025–10–15%

L.8. Hoy cesó el periódico titulado “El Patriota”.

J.11. Hoy en la noche se representó la comedia titulada: "La pensión de Venturita o un mexicano en España" y de Sainete, "Los percances de un apellido". En la misma noche hubo baile en la Lonja (Sociedad Potosina) En este día fue el Corpus-Crhisti cuya función la hubo el ilustrísimo señor Obispo.

V.12. Jubileo en el Santuario de Guadalupe. En la noche se sacramento la señora doña Lugarda Salazar.

S.13. Hoy se ha mudado el señor don Genaro Dávalos con su familia, a la casa que dejó el señor don Manuel Escontria (porque dicho señor se fue a México) en cuya casa que tomó Genaro va a poner su imprenta. Hoy dijo el P. Proa su primera misa (en el Convento de San Francisco) después de haber estado suspenso más de dos años. Salves en San Agustín, el Carmen y la Merced.

D.14. Hoy hubo función en el Convento de San Francisco por ser domingo de sacramento. En la tarde tuvieron ejercicio con música los Libres del Potosí, en el Cuartel del Carmen. En la noche se representó la comedia titulada: "Traidor inconfeso y mártir". En este día hubo órdenes (de presbíteros) en el obispado. En este mismo día, parió la señora esposa de don Cayetano Garaña.

L.15. Hoy hubo jubileo en el Colegio de San Nicolás. En este día salió para México el señor don Genaro Dávalos. En la noche hubo retreta en el Cuartel del Carmen.

M.16. Hoy parió la señora del señor licenciado don Rafael Sousa. En la noche se representó la comedia titulada: "El Tío Canillitas o el nuevo mundo en España". En este día hubo jubileo en el convento del Carmen.

J.18. En este día fue la octava del Corpus-Christi. En la tarde también hubo procesión en la villa de San Sebastián. En la noche se representó la comedia titulada: "Un avaro o el millonario de Guadalajara" y de sainete: "Ojo y Nariz don Bruno Chafarote y el pedicuro".

V.19. Jubileo en San Agustín y en el Sagrario. Hoy cantó misa el señor presbítero don Juan Ortega en el Colegio de San Nicolás quedando todo el día su majestad patente, después de la función. En la tarde hubo corpus. En la noche bautizó el señor presbítero don Antonio Mascorro al niño del señor licenciado Sousa y hubo baile.

S.20. Salves en San Agustín el Carmen, la Merced y el Santuario, habiendo en esta última Iglesia, rosario antes de la Salve.

D.21. Hoy hubo función en el convento de San Agustín en honor de San Luis Gon

%p20–Vildosola–2025–10–15%

zaga la cual es costeada por el Señor Don J.M. Longinos, La misa la dijo el R. P.F. Ramón Carranco y el sermón lo predico el señor canónigo don Antonio Mascorro. En la tarde trajeron a María Santísima del desierto para la santa Iglesia Catedral donde se le va a hacer un triduo. En la noche se representó la comedia titulada: "Subir del caldaso al trono o un embajador hechicero” (fue de magia). En este día en la mañana se casó en el convento del Carmen el señor don Crispín Gutiérrez Castillo con la señora doña Antonia Soberón. En la noche hubo baile en la casa del señor don francisco Manrique. En la mañana después de la misa que hubo en San Agustín quedó su majestad patente.

L.22. Hoy se empezó en Catedral el triduo a María Santísima de Guadalupe. En la noche hubo retreta con música en el cuartel del Carmen, y en el Teatro se repitió la comedia del día de ayer. Hoy está en el mesón de San Joaquín un nuevo animal que esta de venta, el cual tiene la rareza de tener, el cuerpo de elefante, los cuerpos de chivo, las patas de res, y el pelo de cochino. Cuyo animal se llama El Caraboa de África. Hoy parió la señora doña Dolores Sánchez esposa del señor don Pedro Landeta.

M.23. Hoy a las nueve de la mañana fueron tirados 25 cañonazos, los que fueron tirados en el Cuartel del Carmen, para enarbolar en la casa del Cónsul, el pabellón inglés. En la noche se representó en el teatro la comedia titulada: etcétera, juntamente con un nuevo mágico, el cual hace varias suertes. Dicho mágico es el señor Reinoldos.

Mes.24. Hoy hubo jubileo en el Convento de la Merced. En la noche se había de haber representado en el teatro varias suertes por el señor Reinoldos, y una pieza dramática por la compañía del señor Arias, titulada: "La familia improvisada". También una pieza de baile bailada, por la niña del señor Reinoldos, ejecutada otra de canto, por el señor Arias, pero como a la hora de costumbre no hubo entradas no se representó nada.

J.25. Hoy se comenzó otro triduo a María Santísima de Guadalupe del desierto (en la Iglesia Catedral).

V.26. En la noche hubo función de Teatro.

S.27. Salves en la tarde, en San Agustín, el Carmen, la Merced y el Santuario. Hoy llegó la compañía de ópera italiana. En este día hubo vísperas y maitines, en el Sagrario, donde estaba muy adornado por ser la función del Corpus de la Hermandad Nuestro Amo. Hoy apresaron a don Antonio Luna, editor responsable del perió

%p21–Vildosola–2025–10–15%

dico "La Razón" por haber impreso el manifiesto de Santa Anna.

D.28. Hoy hubo función en el Sagrario, habiendo dicho la misa el ilustrísimo señor Obispo. Por la tarde salió corpus de la misa Iglesia, y hubo vísperas en Catedral. En la noche hubo función de teatro. En este día se hicieron las elecciones para electores de los diputados para México.

L.29. Hoy hubo función en Catedral, en honor de San Pedro La misa la dijo el arcediano, el señor don Juan Gutiérrez, y el sermón el ilustrísimo señor Obispo. En la tarde hubo toros, donde presentaron el animal (Caraboa de África). También en la tarde bautizó el señor don Ramón Larrache y su señora a la niña de doña Dolores Sánchez. Por la noche hubo comedia en el teatro, y retreta en el Cuartel del Carmen.

M.30. En la tarde de este día fue llevada la Virgen del Desierto que estaba en Catedral al Colegio de San Nicolás, donde se le va a hacer un triduo, a costa de las Placeras.

Julio

Mes.1. Hoy comenzó con triduo a María Santísima de Guadalupe del Desierto en la Iglesia del Colegio de San Nicolás. Hoy se encargó de la prefectura el señor don J.M. Aranda, por haber renunciado el señor Faz con motivo de tener que salir fuera, por haber sido nombrado administrador de Guanamé. Hoy salió libre don Antonio Luna. Jubileo en Santiago y en el Sagrario.

J.2. Hoy hubo función en San Agustín, en honor de Nuestra Señora del Socorro, la misa la dijo el P.F.R. Carranco, y predicó el corista el P. Villa señor. También hubo jubileo. En este día salió a misa la señora doña Teresa Lambarri, habiendo sido la misa en Tercera Orden la dijo el R.P.F. Francisco Orozco. Hoy se supo que el señor Mejía había capitulado con el señor Rosas-Landa. Hoy volvió a desempeñar la secretaria del gobierno el señor licenciado don Antonio Ávila. Hoy en la noche se representó la primera pieza de ópera, titulada: "Hernani o el honor castellano".

V.3. Jubileo en San Agustín. En este día le concluyeron el triduo a la Santísima Virgen del Desierto que estaba en el Colegio de San Nicolás, habiéndola pasado en la tarde a la Villa de Santiago. Hoy se casó en la Villa de San Miguelito el señor don Jesús Santa-Ana (oficial) con la señora doña Tomasa Briones.

S.4. Jubileo en el Sagrario. En la capilla del Rosario hubo también función.

%p22–Vildosola–2025–10–15%

Hoy profesaron en la religión franciscana, los novicios el Padre Narváez y el Padre Torres. Hoy se dice que el señor Mejía se fugó después de los tratados que hizo con el señor Rosas-Landa.

D.5. En este día se instaló el Congreso del Estado, habiendo habido a las 11 de la mañana, cosa de 21 cañonazos, repicando en algunas Iglesias y tirando cohetes en los cuarteles, en los que también tocaron dianas. Cerca de la una salió música por las calles habiendo dado algunas vivas, los del pueblo. En este día dejo el empleo de consejero el señor don Betancourt Paz. En la tarde hubo música en el Santuario, y en la noche serenatas en el Cuartel del Carmen y en la Plaza de Armas, habiendo estado dichos puntos muy iluminados y con bastante concurrencia. En la noche hubo segunda función de ópera repitiendo la misma del jueves.

L.6. Hoy se reunió el Congreso para nombrar Gobernador, habiendo salido electo el señor don Anastasio Parrodi, y sustituto el señor don Eulalio Degollado. En este día tocaron dianas en los cuarteles, tiraron cohetes, y hubo música en la esquina de la casa del Señor Degollado. En la tarde hubo función de toros dedicada al Señor Gobernador.

M.7. Hoy tomó posesión del gobierno el señor don Eulalio Degollado luego que tomó posesión hubo música en su casa, y hubo algunos vivas por la plebe tirando algunos cohetes. En la noche hubo en el teatro función de ópera titulada: "Lucia de Lamermoor." En este día entregó el cargo de la secretaria del Gobierno el señor don Antonio Ávila. En este día se empezó el novenario en el Convento del Carmen a María Santísima, habiendo salido el convite en la tarde. Hoy dio el señor Degollado su proclama.

Mes.8. Hoy jubileo en el Convento de San Francisco, Sagrario y Villa de Tequisquiapan. En este día dejó el mando de coronel de la Guardia Nacional el señor don Betancourt Paz. Encargándose interinamente el señor licenciado don F. Villanueva. En este día dejo la prefectura el señor Aranda y se encargó de ella el señor don Francisco Nava. También se encargó en este día, de la secretaria de la prefectura, señor licenciado don José María Martínez, por haber renunciado el señor don José María García. En este día murió, la señora doña Josefa Salazar, tía del señor don Juan Vega. En la noche llego de México el señor don Genaro Dávalos.

J.9. En la noche hubo función de ópera titulada: "Nabuconosor Rey de Babilonia".

%p25–Vildosola–2025–10–15%

V.10. Hoy salió impreso que da el ilustrísimo señor Obispo para aclarar que el oficial don Jesús Santa-Anna que días pasados se casó, no es cierto que él dispuso se casara, sin la retractación del Juramento a la constitución, como lo dice el periódico "El liberal" a lo que el señor Obispo contesta, que ni aún aviso siquiera había tenido de dicho casamiento. En este día salió el señor Paz para la hacienda de Carranco.

S.11. Hoy en la noche, hubo función de ópera titulada: "Lucia de lammermoor."

D.12. En este día fue abierta una nueva pastelería francesa. En este día fue encontrado en un cuarto del Bazar, a don Juan Bastón (conocido bajo dicho apellido) el cual, se halló ahogado de vino, y echando sangre por boca y narices. En la tarde fue pasado al hospital. En la misma tarde asistió al ejercicio, que cada ocho días se hace, en el Cuartel del Carmen asistió el señor Gobernador. En la misma tarde fue pasada la Santísima Virgen del desierto que estaba en Santiago a la Villa de Tlaxcala. En la noche, hubo función de ópera a beneficio de una de las actrices representando la pieza titulada: "Lucrecia Borgia." Hoy jubileo en el Santuario de Guadalupe.

L.13. Hoy fueron las elecciones para Presidente de la República, saliendo por mayoría de votos el ciudadano don Ignacio Comonfort, y para Presiden de la suprema corte de justicia, el ciudadano don Ponciano Arriaga, por lo que tocaron dianas y tiraron cohetes. Hoy se mudó la librería que estaba en la tienda de la casa, que ocupa el señor don Genaro Dávalos, perteneciente dicha librería al señor don Mateo Rada; se mudó a los bajos del señor don Pedro San Juan. Hoy salieron nombrados diputados para México los siguientes: por el estado de San Luis el señor licenciado don Antonio Ávila, propietario, y suplente, el señor licenciado don Juan Manuel Aguirre; por Santa María del Rio, propietario, don Abraham Hernández y suplente don José María Murillo; por Mexquitic, propietario, don Pilar Bustamante, y suplente, don francisco Palomo, por el Venado, propietario, don Darío Reyes y suplente, licenciado don Luis Guzmán, por Cerritos, propietario, don Mariano Villalobos (Hijo) y suplente, don Carlos María Escobar; por el Armadillo, propietario don Tomás O. de Parada y suplente don José María Fernández Rincón; por Catorce propietaria, don Miguel María Ávila y suplente, don Darío Reyes.

%p26–Vildosola–2025–10–15%

M.14. En la mañana de hoy pasó el señor San Miguel de su villa, para el Convento del Carmen, el cual iba en procesión y con música. Hoy murió la hija de don Emeterio Sosa. Hoy llegó el señor don Luis Valcallo con su señora la cual vino a curarse.

Mes.15. En la mañana de hoy salió la madrugada del Convento del Carmen, habiendo habido repiques y música, por la tarde, hubo en el mismo Convento del Carmen vísperas y en la noche maitines, y serenata en la plazuela, donde también había árboles de cohetes. También en este mismo día, cerca de las 12 de la mañana, pasaron las flores con la Santísima Virgen, la que salió de la casa de las señoras Bustamante, que es en donde la traen a vestir. Hoy jubileo en el Colegio de San Nicolás.

J.16. En este día hubo jubileo en el Convento del Carmen, habiendo habido muy buena función por ser el día de la Santísima Virgen. La misa la dijo el M.R.P. guardián de San Francisco, el P.F. Francisco Orozco y el sermón lo dijo el señor canónigo Ledón. En la misa cantaron las actrices de la ópera italiana, habiendo asistido a la función el ilustrísimo señor Obispo. En la tarde hubo corpus habiendo estado muy concurrido. Hoy se perdieron cuatro hilos de perlas, a una de las niñas que iban vestidas de almas gloriosas. Hoy apresaron al señor don Cayetano Garaña, por no haber querido entregar las llaves de una casa a un adjudicarlo. En este día el señor don Luis Gascon de la Villa de San Francisco se ofrece, por medio de una atenta comunicación al señor Gobernador, para que se le permita ser uno de los primeros que tengan que salir, a combatir a las fuerzas españolas. Hoy en la noche hubo función de ópera titulada: "Lucia de Lammermoor."

V.17. Hoy llego el Señor Paz de la hacienda de Carranco. En este día empezó el octavario del Convento del Carmen. Hoy se repartieron unos avisos, diciendo que en la peluquería del señor Aguer, se halla una persona inteligente para peinar, a las señoras de un modo muy bonito y enseñará a las que quisieran, por precios cómodos.

L.18. En este día murió repentinamente un oficial del batallón de los de Guanajuato. En la noche hubo función de ópera titulada: "La Sonámbula". En este día fue nombrado fiscal de imprenta, el señor don Ramón F. Gamarra. Hoy salió por la tarde en San Agustín, el Carmen, la Merced, y el Santuario.

%p27–Vildosola–2025–10–15%

D.19. Hoy jubileo en el Convento de San Agustín y en el Sagrario. Hoy se ofrece al público el señor don Francisco Figueroa, para fabricar toda clase de fuegos artificiales. Hoy son citados todos los ciudadanos, para que en la tarde se presenten al Cuartel del Carmen, con el objeto de formar un batallón para que, en caso de haber la guerra con España, salir a atacarlos. En la tarde hubo función de Toros, y en la noche función de ópera titulada “El Trovador”, siendo a beneficio del señor Barili.

L.20. En este día la junta patriótica de esta capital nombro a los oradores, para los días 16, 17 de septiembre en ella junta la componen los señores siguientes: don Eulalio Degollado, gobernador del estado; presidente; el señor licenciado don Vicente Chico Sein, vicepresidente, vocales, el señor comandante general don Mariano Morett, el señor diputado don Manuel Terrazas, el licenciado don Pablo R. Gordoa, secretario, el señor don José María García, oradores para el 15 de setiembre en la noche, el señor don Ambrosio Salazar, para el 16 el señor licenciado don Juan B. Barragán, para el 27 el señor licenciado don Fortunato Nava, para el sermón del día 16 el M.R.P. prior del Convento de San Agustín F.J. María Marín, para el 17 el señor presbítero don Mariano Saldaña y para el 28 el M.R.P.F. Cipriano Quintero. En este dispuso el señor gobernador el establecer una junta de fomento, por orden del señor ministro; para que se forme lo más pronto, son nombrados vocales los señores don Florencio Cabrera, don Rafael Vega, don Irineo Gavia y don Ramón F. Gamarra. Hoy también fue nombrado vocal de la junta directiva del Hospital de pobres de San Juan de Dios, el señor don Marciano Hernández, por el fallecimiento del señor don Antonio Rodríguez Fernández.

M.21. Hoy se retractó del juramento hecho a la constitución el señor don Juan Herrera. En este día fue cateado el rancho del señor general Pavón. En la noche hubo función de ópera titulada: "I Masnadieri."

Mes. 22. Hoy pasó el señor gobernador al presidente del excelentísimo Ayuntamiento, una comunicación para que coopere esta corporación, a que se establezca una biblioteca pública para la instrucción popular. Hoy salió el Cuarto Regimiento de Caballería para México, y conducen presos a los señores don Crescencio Contreras y don Rafael Días de León. Hoy se estrenó una esquila en la torre de San Miguelito y fue su bendición, habiendo habido repiques y cohetes. Hoy salió libre el señor don Cayetano Garaña.

%p28–Vildosola–2025–10–15%

J.23. Hoy por renuncia que hizo al señor don Ambrosio Salazar de pronunciar la oración del 15 de septiembre en la noche, ha sido nombrado para dicho acto, el señor don Cipriano Martínez. En este día parió la señora López, es posa del señor don Francisco Camacho. En la tarde de hoy, trajeron a María Santísima de Guadalupe del desierto, de la villa de Tlaxcala, a la de San Miguelito. En la noche hubo función de ópera titulada “I. Masnadieri”. En esta misma noche hubo serenata en la plazuela de San Miguelito.

V.24. Hoy jubileo en el Convento de la Merced. En este día parió Severiana. Hoy numeraron las casas.

S.25. Hoy es nombrado secretario de gobierno el señor don Ramón F. Gamarra. En la noche murió el señor cura de San Sebastián el presbítero don N. Navarrete. En la noche hubo maitines en la Villa de Santiago, habiendo habido muy buenos fuegos, hechos por una de las actrices de la ópera. Hoy en la tarde salves en San Agustín, el Carmen, la Merced y el Santuario.

D.26. Hoy hubo función en la Villa de Santiago, y en la tarde Corpus. En la noche hubo función de ópera, siendo a beneficio de la actriz doña Constanza Manzini, poniendo en escena la pieza titulada: "El barbero de Sevilla". En este día se ofrece al público como escribano público nacional, el señor don Fermín Miranda.

L.27. Hoy fue llevada en procesión a María Santísima de Guadalupe del Desierto de la Villa de San Miguelito, a la de Tequisquiapan habiéndole cantado salve en el Convento de San Francisco. Hoy por orden del señor gobernador fue disuelta la junta Lancasteriana que la componían más de cincuenta individuos, para formar una nueva que la componen los señores Siguientes: don Francisco Macías, don J. María García y el presbítero don Mariano Saldaña. Tesorero el señor don Juan Viramontes. Hoy en la noche hubo función de ópera.

M.28. Hoy se bautizó el niño de Severiana siendo padrinos de brazos mi Papá y Mamá, y de óleos, el presbítero don Luis Arias, habiéndole puesto el nombre de Buenaventura. En este dio orden el señor gobernador pasa que los señores abogados y escribanos, que se presenten a juicio y

%p29–Vildosola–2025–10–15%

que no hallan jurado la constitución, no se les puede formar, juicio ni tampoco despachar. En este día se sabe que el señor don Juan Othón, ha sido prendidos en Querétaro y que se le conduce para esta capital. también se dice que don Francisco Alemán y otros han sido presados por el motín de Rioverde, y que también se les conduce para esta capital. Hoy da un aviso el señor Don Antonio Hernández en que dice que en el término de dos meses ha vacunado a 337 individuos. En la noche hubo función de ópera.

Mes.29. Hoy dispuso el Gobernador se armen 30 hombres para la Guardia Nacional y además de estos, otros 400 hombres. también en este día se encarga a la policía que conduzcan a todos los pobres al Hospicio.

J.30. Hoy se le paso al señor Paz una comunicación del gobierno, para que entregue la dirección del Hospital de Pobres de San Juan de Dios al señor don Antonio Hernández. Hoy en la noche fue el señor prefecto a la casa del P. Prior de San Agustín F.J.M. Marín, a sacar a una sobrina de dicho padre, la cual se va a casar con un sastre. La sacaron porque el padre no quiso dar su consentimiento.

V.31. Hoy entrega la dirección del Hospital el señor Paz al señor Hernández. Hoy por ser día del cumpleaños del señor Presidente de la República, hubo música y salva a la madrugada. En la tarde se cerró el comercio y salió un carro muy adornado con el retrato del señor Comonfort, cuyo carro fue al Santuario llevando música, la que estuvo tocando hasta la oración. En la noche, hubo serenatas en la plaza y cuartel del Carmen estando muy adornado ambos puntos, y en la plaza hubo fuegos. En la misma noche hubo en el Teatro función de ópera.

Agosto

S.1. Hoy se ha nombrado fiscal de imprenta al señor don Cipriano Martínez. Hoy jubileo en Santiago, Sagrario y en el Convento de San Francisco en cuya Iglesia descubría su Majestad a las dos de la tarde por ser el júbilo de porciúncula. Hoy se fijaron unos avisos para que se cierren las tiendas todos los domingos, para que se presten todos los ciudada

%p30–Vildosola–2025–10–15%

nos, al ejercicio que se hace en el Cuartel del Carmen. Hoy comenzaron los exámenes en el Seminario Conciliar.

D.2. En este día hubo función en el Convento de San Francisco, por el jubileo de porciúncula. En la tarde hubo función de toros, a beneficio del Santuario de Nuestra Señora de Guadalupe. En la noche, hubo función de ópera a beneficio del empresario don Andrés Mansini, representando la ópera titulada: "Juana de Arco o sea la Virgen de Orleans". En la misma noche, se empezaron los exámenes de la cátedra de física, en el Seminario examinándose el señor don J.M. Becerra. Siendo replicas, el Presbítero Don J. M. Sánchez Gutiérrez y el presbítero don Pedro Gaitán; además de estos señores el catedrático de dicha catedra el presbítero don Telésforo Macías. Hoy llego de México el señor don Santiago Vidaurri.

L.3. Jubileo en el Convento de San Agustín. Hoy por orden de la prefectura se manda que se presenten todos los ciudadanos exceptuados de la Guardia Nacional, el que se presenten, para registrar sus excepciones. En la tarde de hoy, murió repentinamente la esposa del señor Don Mariano Vega. En la tarde de hoy elevaron a María Santísima de Guadalupe del Desierto, que estaba en Tequisquiapan, la llevaron para el Desierto. En la noche se examinaron en el seminario los señores don Joaquín Villalobos y don Domingo Arriola.

M.4. Jubileo en el Sagrario. Hoy salió para Monterrey el señor Vidaurri. Hoy hubo acto público en el Santuario conciliar sustentado por el señor don Cenobio Mendoza, (cursante de Teología). En la noche hubo función de ópera a beneficio de los esposos el señor Belini y la señora Garofali, la ópera es titulada: "El Belisario". Siendo la última función que dan las actrices de la ópera, en esta capital. Hoy al salir del Teatro, segó la hija más chica del señor don J.M. Aguirre.

Mes.5. Hoy es nombrado el señor don Francisco Bustamante, para que tomara empleo de contribuciones directas, por repararlo el gobierno al señor don Luis Legorreta. El C. Don Telésforo Sustaita fue nombrado segundo jefe.

J.6. Hoy se ofrecen al público como retratistas los señores don Carlos Rand y don O. B. Curtis para hacer retratos por el nuevo método del ambrotipo En este día, pone el R.P.F. Antonio Mata (vicario de la villa de San

%p31–Vildosola–2025–10–15%

Miguelito) un comunicado en el periódico "La Razón" en el que manifiesta, que contrayentes del matrimonio los señores don Jesús Santa Ana y la señora doña Tomasa Briones, de que habla el periódico "El liberal" diciendo que el señor Santa Ana se casó sin la retractación del juramento hecho a la constitución de 1857, a lo que contesta el padre Mata, que se casaron ciertamente, pero que en todo obro maldad, pues le llevó una boleta de confesión y se le presentó en clase de paisano, y no de militar como lo es; por lo que ignorando el todo, los caso; pero ahora que ha visto lo que hay sobre el particular, pone dicho comunicado para declarar nulo el casamiento, pues en todo entró engaño. También el señor don Francisco Alemán, que se encuentra preso en esta capital por negocios políticos, pone un comunicado el cual tiene por objeto, el dar las gracias a varias personas que se interesaron para que lo tuvieran preso en otro lugar y no en la cárcel pública donde está. También da las gracias a varias personas que, en la tercena de la Diana, contribuyeron para darles de comer al señor Alemán y otros, presos por la misma causa que él. En este día, se fueron los señores que componen la compañía, de la ópera italiana, a excepción del señor Manzini, su esposa, y otros dos. En este día, hubo acto público en Seminario, sustentado por don Miguel Villalobos (cursante de derecho). Hoy hubo junta de médicos, para ver a la niña del señor don José María Aguirre, dejando de asistir por haberse negado según dicen, el señor don Tomás O. de Parada.

V. 7. En la noche de este día presaron al P.F. Antonio Medellín (vicario de la Villa de Santiago) por creer que tenía gente reunida, dispuesta para pronunciamiento o cosa semejante, esto lo pensaron porque vieron salir del curato de dicha villa a varios hombres a caballo y armados, los cuales iban a encontrar a la familia del padre, que venía de fuera. También apresaron en la misma noche al señor don J.M. Hernández y su esposa y su hijo, a las cuales los tuvieron en compañía del padre Medellín, presos en el Cuartel del Carmen. En este día trajeron preso por negocios políticos, al padre Yáñez (cura de Nuevo Gamotes), el cual lo pusieron en el Convento de San Francisco.

S.8. Hoy jubilo en el Sagrario, Convento de San Francisco y villa de

%p32–Vildosola–2025–10–15%

Tequisquiapan. También en la misma mañana, hubo acto público sustentado por don Francisco Anaya (cursante de la cátedra de mayores) y en la tarde hubo otro sustentado por don Francisco Gaytán (cursante de la catedra de lógica) En este día salió en el periódico "La Razón", un comunicado puesto por el señor don J.M. Monjarás; el cual, tiene por objeto el dar noticia que tiene contratada la fábrica de la Diana y que de la utilidad que sobra, paga la tienda en que tienda en que tiene su tercena, lo dice, porque sabe que andan algunas personas, indagando de dónde, cómo, o quién, es el [que] paga la tienda. También el señor licenciado don Crescencio Gordoa pone otro comunicado, en que dice no es cierto la adjudicación de una casa del Hospicio de Pobres.

D.9. Hoy hubo acto público en el Seminario sustentado por don Manuel Pereira (cursante de física). En la noche hubo, concierto en el teatro cantando el Señor Manzini y su esposa. En esta misma noche salieron a rondar varias patrullas por haber alarma. Hoy salió libre el presbítero Medellín, y don J.M. Hernández. Hoy al bajar de una carretela se cayó y se golpeó, la esposa del señor licenciado Sousa.

L.10. Hoy me examiné de toda filosofia.

M.11. Hoy renunció el empleo de Secretario de la prefectura, el licenciado don J.M. Martínez, habiéndose encargado de dicho empleo, el señor don Cipriano Martínez. Hoy se dice que el señor Morett, tuvo una incomodidad con el ilustrísimo señor Obispo con respecto al casamiento de su sobrino, sin la retractación del juramento hecho a la constitución, de 1857.

Mes.12. Jubileo en el Santuario. Hoy dedicó unos versos a los potosinos, el hijo del señor Adanto. En este día se encargó del empleo de defensor de pobres, el señor Alvarado, por haber dejado dicho empleo el señor don Cipriano Martínez. En este día hubo acto público en el Seminario sustentado por don Enrique Staines (cursante de medianos y mayores).

V.14. Hoy hubo acto público en el Seminario sustentado por don Anastasio Figueroa (cursante de filosofía.) En este día salió para el Peñasco, el R.P. guardián de Francisco en compañía de dos padres. Hoy es nombrado Vicecónsul americano Doctor Piernás.

S.15. Hoy jubileo en el Colegio de San Nicolás. En la tarde salves en San Agustín, el Carmen, la Merced, y en el Santuario.

D.16. Jubileo en el Convento del Carmen. En este día hubo acto público en

%p33–Vildosola–2025–10–15%

el Seminario sustentado por don Tomás Hoyo (Cursante de física).

L.17. En la noche de este día se sacramentó el señor licenciado don J.M. Esparza Pereda habiendo salido el viático del Convento de San Agustín y llevó a su Majestad el ilustrísimo señor Obispo, habiendo ido a la administración muchas personas particulares.

M.18. Hoy se fijaron unos avisos para que todos los que tengan pendientes pagos de la excepción de la Guardia Nacional, los paguen en la prefectura. Siendo el plazo de tres días. Hoy se ofrece al público el señor don Andrés Avelino, en su facultad de hacer órganos. (Sita en la calle de la Merced).

Mes.19. Hoy jubileo en el Sagrario, y Convento de San Agustín. En este día da el R.P.F. Evaristo Barragán un comunicado en que, manifiesta, no es cierto que se confesó con él, el señor don Jesús Santana, (que días pasados se casó sin retractarse del juramento hecho a la constitución de 57.) pues lo que hizo, fue falsear su firma y de esta manera fue como presentó boleta de confesión. Hoy falleció la señora doña Juana Degollado hermana de don Eulalio. En este día el carpintero don N. Moreno, fue sacado de su carpintería en compañía de los oficiales que con él trabajaban, y conducidos presos al cuartel del Carmen. Hoy murió la señora doña Carmen Márquez. Hoy empezaron las vacaciones en el Seminario. En este día se empezó la novena de San Agustín en su Convento.

J.20. Hoy se colocó de escribiente el señor don Benito Guzmán. Hoy dicen tuvo una incomodidad el señor Gobernador, con el comandante general y el coronel de la guardia nacional de Guanajuato.

V.21. Hoy salió para Charcas el señor don Andrés Gutiérrez, con dinero de unas baras que había traído a acuñar a esta capital. Al salir, fue asaltado por cuatro ladrones, los que le tiraron dos tiros a quema ropa, no dándole campo a defenderse, pues al primer tiro fue muerto. Los mozos fueron amarrados, pero uno de ellos, se pudo desatar el cual fue al momento a dar parte a los de la Villa de San Miguel Mexquitic, de donde vinieron varios indios a per seguir a los ladrones, los que fueron alcanzados y muertos por los mismos indios, trayéndolos hoy a las cinco de la tarde para el hospital. Los trajeron de dos en dos, en un caballo, atravesados y con las cabezas colgando, se dice se van a colgar en el lugar en donde cometieron el crimen, para que sirva

%p34–Vildosola–2025–10–15%

de escarmiento a los hombres de esta clase.

S.22. Hoy se encargó de alcalde primero de esta capital, el señor don Silverio M. Vélez. Hoy abrió su encuadernación en la calle del Guayabo, el señor don Justo Baca.

D.23. En este día fue muerto un mozo del señor don José de la Luz Gómez por el dueño de la tienda "Protección a la miseria" el cual es conocido por el nombre del chino Ignacio, se dice dio la muerte al mozo, casi a sangre fría, solamente por tener agravio con él. Hoy en la noche, a los tres cuartos para las doce, tocaron a quemazón en Catedral por lo que se alarmaron en los cuarteles; pero pronto se quitó esta alarma, pues la quemazón, fue en un jacal de cerca de la zanja de Tequisquiapan. En este día catearon la fábrica de la Diana, y la Nacional.

L.24. Hoy se casó don Francisco Zertuche, con una de la hacienda de Bocas.

M.25. Hoy se supo que el señor don Juan Othón, que se hallaba preso en Guanajuato, después de la fuga del cuartel del Carmen de esta capital, lo ha puesto en libertad el señor Gobernador de aquel estado (el señor Doblado) no se sabe si tendrá la ciudad por cárcel. También se dice que el señor Parrodi, esta para venir a esta capital a tomar posesión del Gobierno. Hoy parió la señora Solís esposa del señor Alcocer.

Mes.26. Hoy se casó don Eleuterio Zavala, con la señora Rentería. Hoy dio un papel el C. Ignacio González, defendiéndose del hecho con el mozo del señor don José de la Luz Gómez. En este día, pasó visita el señor Gobernador, al hospital, al Hospicio, y a las Recogidas.

J.27. En este día se dice que el señor don Cástulo Chávez, fue a la escuela en donde están sus hijos, armado con una pistola, buscando al director, por haber castigado (como es costumbre en todas las escuelas) a uno de sus niños. Hoy entraron cosa de 200 hombres de la Guardia Nacional de Guanajuato. En la noche, se sacramentó la señora doña Guadalupe Contreras. habiendo salido el viático, del convento de San Francisco.

V.28. En este día hubo función en el Convento de San Agustín por ser día del santo. La misa, la canto el M.R.P. Comendador del convento de la Merced, el P.F. Juan N. Porfiriano y el sermón lo predicó el presbítero don Telésforo Macías (vicerrector del Seminario). Hoy salió libre don Lorenzo Vega que se encontraba preso, por decirse que él había sido el que había

%p35–Vildosola–2025–10–15%

dado muerte (cuando el sitio) al señor don Archibaldo Staines. En este día se ha circulado un cuaderno que la junta directiva da, para dar noticia del estado en que se encuentran las escuelas.

S.29. En este día fue suspendido el Señor Juez segundo de letras, de esta capital (don Mariano Villalobos) por no haber denunciado el número 43 del periódico "La Razón". Hoy ha sido nombrando fiscal de imprenta, el señor Alvarado por haber renunciado el señor Martínez.

D.30. En la tarde iba a haber función de toros, pero estos salieron, y ya no hubo ninguna función. En la noche empezaron los faroles de la novena de la Virgen de los Remedios, de la Villa de Tequisquiapan.

L.31. En este día fue puesto preso el señor don Genaro Dávalos, y sentenciado a seis meses de prisión y $300 de multa, y si no los paga, otros más de prisión, por la denuncia hecha a tres artículos, del número 25 del periódico "La Razón". En la noche se fugaron varios presos de los que estaban en el hospital, a los que la guardia que ahí estaba les hizo fuego y se alarmo la población. Hoy le quitaron el empleo de garitero al señor don J.M. Arias.

Septiembre

M.1. Jubileo en el Sagrario y Villa de Santiago. En este mes se hace la suma de lo acuñado en el mes de agosto, en la casa de moneda de esta capital, y es:

En pesos fuertes $142,230.

En moneda de a medio real $150.

Suma $142,320

En este día, se dice que la Honorable Legislatura del Estado, muy pronto discutiría en sus sesiones, el proyecto de constitución. En la sección de Congreso del 22 del pasado, se dispuso que, de los fondos municipales se pagaran $1000 al señor don Martín Gascón, para que reponga la botica del Hospital, que fue saquea da el 11 del pasado febrero. También fue aprobado en dicha sesión, para administrador de rentas de Rioverde el C. don Nicolás Barragán. Hoy llego del rancho el señor don Julio Galnarez, con sus dos hijos, uno para ponerlo en el Seminario y otro para ponerlo en la escuela.

Mes.2. Hoy se sacramento la señora doña Merced Arriaga. En este día se ofrece al público el señor don Jesús Liñan, para hacer toda clase de fuegos Artificiales.

%p36–Vildosola–2025–10–15%

Vive en el Club de Armas de esta capital.

J.3. Jubilo en el convento de San Agustín. Hoy salió libre el señor don Genaro Dávalos por no haber estado bien formada la causa que se presentó al tribunal, cuya causa fue vuelta al que la formo, el señor juez don Fortunato Nava.

V.4. Jubileo en el Sagrario. En este día salió a misa Severiana, siendo en Tercera Orden, la sacó mamá, y la misa la dijo el R.P.F. Buenaventura Domínguez. Hoy presento en quiebra la tienda de las "Rosa" propiedad del Señor Don Pablo Acosta. Hoy se fue para México el señor don J.M. González, su hijo, el señor don Francisco Camacho y su esposa.

S.5. Hoy por orden del Excelentísimo Ayuntamiento se dispuso el que se dijera misa todos los días festivos en las arrecogidas.

D.6. Hoy en la tarde hubo función de Toros.

L.7. Hoy parió la señora doña Dolores Reinoso, esposa del señor don Francisco Sánchez. Hoy se iba a sacramentar el señor Pedraza, pero no lo hizo por no haber querido volver las casas que se adjudicó. En la noche, hubo maitines en la Villa de Tequisquiapan, habiendo habido muy bonitos fuegos y bastante concurrencia.

M. 8. Hoy hubo jubileo en el Convento de San Francisco, Sagrario y Villa de Tequisquiapan, habiendo habido en esta, función de Iglesia, el sermón lo dijo el R.P. Provincial de San Francisco F.J.M. González, en la tarde hubo procesión de Corpus. También en la Iglesias de San Francisco y en el Sagrario, hubo sermón habiendo predicado en la primera, el R.P.F. José Cabral y en la segunda el presbítero don Mariano Saldaña. Hoy salieron para México los señores diputados don Mariano A. Villalobos (hijo), el señor Flores, el señor Hernández y el señor Verástegui. Hoy se sacramento el señor Pedraza, que, según dicen hubo sus disputas, por lo que se dijo ayer. Hoy renunció el sermón del 16 del presente el R.P.P. del convento de San Agustín, quien lo tenía encargado, pero no fue admitida su renuncia.

Mes.9. Hoy se dice van a salir tres periódicos nuevos, habiendo salido por hoy tan solamente, el prospecto del "Rebenque" el cual sale en la imprenta de Dávalos. Hoy se sabe que los señores Cabera, y Lavín, se encuentran en esta capital, al señor Lavín, lo citaron para una junta, por personas conocidas y al asistir a ella se encontró con la policía y lo condujeron

%p37–Vildosola–2025–10–15%

preso al señor Cabrera no se sabe el motivo. En la sesión de hoy, el señor Gobernador a pedido facultades extraordinarias, pero no le fueron concedidas. Por decreto del 27 del pasado se declaró libre la venta de Naipes.

V.11. Hoy en la noche se sacramento la señora doña Guadalupe Vejo, esposa del señor don Luis Baleallo. En este día hubo sermón en la Tercera Orden, predicando el R.P.F. José Cabral, en honor de Santa Rosa de Viterbo. En este día salió para México el señor don Luis Magnin, en compañía de don Carlos Gordoa.

S.12. Hoy jubileo en el Santuario de Guadalupe. Hoy a las diez de la mañana falleció la señora doña Guadalupe Vejo, habiendo sido enterrada en la noche, habiendo ido a acompañar el cadáver hasta el Campo Santo, los Pobres del Hospicio. En este día fueron mandados varios Celadores a la imprenta de Dávalos, para catear dicha casa, con el objeto de buscar al señor don Antonio Luna al cual no lo hallaron por haber salido fuera de esta capital. El cateo fue mandado por el señor juez primero don Fortunato Nava. Hoy salió el prospecto del periódico titulado: "El tío canillitas." En este día pide al H. Congreso del Estado el señor don Francisco Manrique de Lara, el que se le dispense el poco tiempo de edad que le falta para jurar sus intereses.

D.13. Hoy se halla en esta capital el señor licenciado don Ponciano Arriaga. En la tarde hubo función de toros. En la misma tarde, repartieron unos programas para ver el orden que deben seguir las funciones de los días 16,17 del presente mes, también se replica el que se adornen, e iluminen las casas, los días de dichas funciones. En la misma tarde salió el pendón, del Convite de la novena de San Miguelito. En este día, se perdieron en el Convento de San Francisco, en la misa de diez que semanariamente se dice, unos hilos de perlas pertenecientes a la señora doña Ramona Otahegui, esposa del señor don Silverio Aguilar. Hoy murió la señora que cuidaba a las hijas del señor don José Álvarez Sagastegui.

L.14. Hoy fue puesto preso en la cárcel pública de esta capital, el señor don Juan Othón, el cual fue asaltado en el camino por decirse que se venía a pronunciarse. En la tarde salió el bando de las fun

%p38–Vildosola–2025–10–15%

ciones de los días 16, 17, 27 y 28 habiendo salido en dicho banco el Ayuntamiento y un piquete de los Guardias Nacionales, durante el bando, hubo repiques habiendo estado estos muy tristes.

M.15. Hoy jubileo en el Colegio de San Nicolás. En este día se empezó la novena en el Convento de la Merced. Hoy pasaron al Señor Othón, al Hospicio, que es, donde es el cuartel del batallón de Guanajuato. En la noche a las 11, hubo repiques y cohetes, para celebrar el glorioso grito de la Independencia; habiendo estado Palacio muy iluminado. En la misma noche, hubo en el teatro un discurso pronunciado por el licenciado don Ponciano Arriaga, también otros dijeron algunas poesías; entre ellos, dijo unas, el señor don Ambrosio Espinosa, estando el teatro muy adornado y con bastantes luces, tanto dentro como fuera.

Mes.16. Hoy jubileo en el convento del Carmen. En la misma mañana fue en Catedral, la función que anualmente se hace en honor de la Independencia, habiendo asistido el ilustrísimo señor Obispo, todas las autoridades y comunidades. La misa, la dijo el señor Ledón y el sermón el R.P. Villaseñor (corista del convento de San Agustín). Al empezar y finalizar la misa hubo descargas y a las doce del día salvas de artillería. Hoy pusieron unos, papeles en las esquinas, en que, se avisa al público que después de conferenciar el señor Gobernador con el señor Prefecto sobre el articulado 10 de la constitución federal (que desde hoy debe regir) en que dice que, todos pueden andar armados a excepción de ciertas armas que después se dirán cuáles son, más mientras estas armas no disponga el Supremo Gobierno cuales son, el señor Prefecto de acuerdo con el señor Gobernador, hace saber que, mientras no se diga cuales armas son prohibidas, todas las serán; exponiéndose a las leyes que se acorden las personas que las usaren. Hoy se cerró el comercio. En la tarde hubo en el Santuario debajo del portal de la casa del señor don Mariano Martínez, el discurso en honor de la Independencia, pronunciado por el C. don Cipriano Martínez habiendo salido desde Palacio, el señor Gobernador y demás autoridades, también marchó el batallón de Guanajuato y los del Tercero de Caballería. La Guardia Nacional estaba formada en el paseo del Santuario, formando valla. En la noche hubo serenatas en la Plaza de Armas y Cuartel del Carmen, estando ambos puntos,

%p39–Vildosola–2025–10–15%

la casa de Moneda y varias casas particulares muy iluminadas. En la Plaza de Armas, hubo fuegos artificiales los cuales se prendieron a las diez. También los bailes de las villas estaban en las esquinas de la plaza.

J.17. Hoy hubo sermón en Tercera Orden por la impresión de las llagas de N.S.P.S. Francisco, el cual lo dijo R.P. Alvarado (vicario de Tequisquiapan) También en Catedral, hubo oración fúnebre pronunciada por el presbítero don Mariano Saldaña habiendo asistido a dicha función, el Gobernador y demás autoridades, las honras fueron por el señor cura don Miguel Hidalgo. Al empezar la misa al salir el sermón y al concluir, hubo descargas. En este día salió el prospecto del nuevo periódico titulado: "La Comezón".

V. 19. Hoy jubileo en el Convento de San Agustín y en el Sagrario. Hoy salió para el Peñasco el R.P. guardián de San Francisco. En la noche se sacramentó el señor licenciado don Manuel B. del castillo, habiendo concurrido bastante gente. También en esta misma noche, se tomó el dicho de casamiento el señor don Juan Vega.

D. 20. Hoy hubo función y procesión en la tarde, en la Villa de la Soledad de los Ranchos. Hoy llego del Peñasco el P. guardián de San Francisco.

L. 21. Hoy hubo honras por la alma de la señora doña Antonia Inguanzo, esposa del señor don Matías Parra, las cuales, fueron en el Convento de San Francisco. Hoy se fue para Guadalcázar el señor don Luis Valcallo, habiéndose ido con él, el señor don Herculano Bermúdez el cual no va masque a la hacienda del Pozo de Acuña, a ver a su hermano.

M. 22. Hoy a las 7 de la mañana murió el licenciado don Manuel B. Castillo. En este día se retractó del juramenta hecho a la constitución el señor don J.M. Arias. Hoy hay una caja mágica, que responde todo lo que se le pregunte. Dicha caja está en una contra esquina de las arecogidas siendo el precio, por lo que se puede entrar a hacer preguntas el de un real.

Mes. 23. Hoy concuyó la novena de María Santísima que se hace en el convento de la Merced. En la tarde hubo vísperas. Hoy se

%p40–Vildosola–2025–10–15%

publicó un proyecto de constitución para el Estado de San Luis Potosí.

J.24. Hoy a la madrugada se casó en el Santuario, el señor don Juan Vega con la señora doña Refugio Esparza. Hoy jubileo en el convento de la Merced, habiendo habido muy buena función. La misa la dijo el M.R.P. Prior del convento de San Agustín el P.F.J.M. Marín y el sermón lo dijo el P. comendador del Convento de la Merced el P.F. Juan N. Soriano. A la función asistieron todas las comunidades. Hoy llegó de México el señor don Luis Covarrubias.

V.25. Hoy empezó en el convento de San Francisco el novenario al santo patrón. En este día, se ofrece como dentista el señor don Domingo Nis para todas las cosas que encierra el ejercicio de su profesión, el cual se halla posado en el mesón de San Joaquín Número 9 y se ofrece ir a las casas donde lo llamen. Hoy se empezó a mudar el señor don Rafael Aguirre, a la casa del señor don Pablo R. Gordoa; cuya casa se la cambio el señor Aguirre, por la suya, dándole en plata $14000. Hoy se fue para su hacienda el señor don Pedro Sanjuan.

L.26. Hoy se sabe que el ilustrísimo señor Verea Obispo de Monterrey que venía desterrado para esta capital, por orden del señor Gobernador no le fue permitido el que entrara al estado, pero dicha orden parece que fue burlada, porque ante de recibirla ya había tomado la dirección para Zacatecas. El señor Garza, Gobernador de Tamaulipas que se haya en esta capital, de paso para su estado y mediante su influjo, el contratista de la casa de moneda sea ha comprometido a no establecer otra en el mineral de Catorce, como lo había prometido al Supremo Gobierno. También el mismo señor Garza trabaja con empeño en esta capital para conseguir accionistas que trabajen para llevar adelante su platas de establecer un ferrocarril de estas capital a Tampico para lo cual se sito una junta que hubo lugar en la casa del señor licenciado don Pablo R. Gordoa. El señor Garza asegura que cuenta ya con dos millones de pesos para esta empresa, y espera que el estado de San Luis le proporcione recurso para que realice su proyecto. También hoy varios amigos del señor Gobernador andan juntan

%p41–Vildosola–2025–10–15%

do firmas para que aunque llegue el señor Gobernador propietario el señor Parrodi, siempre continúe el señor Degollado. Hoy se asegura que el señor Parrodi, muy pronto estará en esta capital. También se dice que con motivo de un soldado ebrio de la Guardia Nacional dio para a su comandante de que por la Garita de México habían pasado tres hombres a caballo y que no fuera que se quisieran pronunciar por lo que se alarmó la tropa, y a esas horas se mandaron ocupar las alturas de las casas inmediatas al Cuartel del Carmen, y también se iban a abocar tres piezas de artillería en las bocascalles del cuartel; pero esto no se hizo por no haber lo permitido el señor comandante general. Hoy salió un alcance del periódico "La Razón" en el que ponen un comunicado del señor Vázquez Tejada. Hoy fue asaltada la mercería de don Bonifacio Vargas por unos ladrones, los que habiendo sido sentidos no se llevaron más que cosas de poco valor. Hoy cerca de las tres de la tarde vinieron a la relojería de papá, tres hombres los cuales traían estoques; y sin hablar palabra se metieron no se sabe que objeto traerían, porque al entrar un señor se salieron sin hablar, lo mismo que cuando entraron.

D.27. Hoy en la mañana hubo salva de Artillería y un corto repique se enarbolo el pabellón y hubo Fe Deum en la Iglesia Catedral habiendo asistido las comunidades y autoridades. A las 12 hubo otra salva y en la tarde salieron de palacio las autoridades con la tropa al Santuario en donde hubo lugar el discurso pronunciado por el señor licenciado don Fortunato Nava cuyo discurso fue dicho debajo del portal de la casa, del señor don Mariano Martínez. En la tarde hubo otra salva para quitar el pabellón y en la noche hubo serenata en la Plaza estando está muy iluminada, lo mismo que la Casa de Moneda, la de Correos y otras varias casas de particulares. A las nueve de la noche se prendieron los fuegos de la plaza. Hoy cerca del cementerio del Convento del Carmen herido un soldado de la Guardia Nacional, por otro de los que allí estaban cuidando las piezas de artillería.

%p42–Vildosola–2025–10–15%

L.28. Hoy en la mañana salva de artillería, en la misma mañana profeso en la religión franciscana, profesó el novicio franciscano. En la mañana a las 10, hubo función en Catedral de las honras de Iturbide habiendo asistido parte de las autoridades. La misa la dijo el señor Guajardo y el sermón el R.P.F. Cipriano Quintero, habiendo habido descargas hechas por los del batallón de Guanajuato, al salir la misa, al azar y al comenzar y concluir el sermón. Durante todo el día de hoy, hubo tiros de cañón hasta las ocho de la noche. Hoy intentaron robar la casa del señor don Seferino Navarro, pero afortunadamente fueron sentidos y no se llevaron nada.

M.29. En la junta que hubo en la casa del señor Gordoa a moción del señor Garza para solicitar accionistas para establecer el ferrocarril nombraron una junta compuesta de los señores siguientes: presidente don Herculano Manrique, tesorero don Rafael Aguirre, secretario licenciado don Vicente Chico Sein, vocales don Arturo Piernás y don José María Facha. Hoy llegó de México don Luis Magnin y don Carlos Gordoa. Hoy salió un impreso del señor don Agustín Gordoy, que da el señor don Bernardo Othón, con respecto a un negocio pendiente. Hoy solicitó al Congreso el señor don Manuel Hernández, para que se le paguen mil y pico de pesos, que se le deben, por el tiempo que sirvió de taquígrafo. También la señora doña Pepa Portillo solicita el que se le pague otro tanto por el tiempo que sirvió de ensayador su marido, don Mariano Salazar.

Mes.30. Hoy salió un alcance al periódico "La Razón" el cual manifiesta los abusos que hace el señor juez, don Susano Quevedo con respecto de los bienes del señor Samaniego, donde su defensor, don Juan N. Vázquez Tejada, da noticia de todo. El señor Calvo que se haya preso en el Hospicio, publica en el periódico "La Razón" una carta para que sepa el público que, además de los falsos que por desconceptuarlo le han levantado, hoy sabe que con una indecentísima carta puestos a su nombre, han ido a pedir diez pesos al ilustrísimo señor Obispo, lo cree ser de su deber, manifestar al público para desmentir el hecho. El

%p43–Vildosola–2025–10–15%

señor Parrodi a escrito para que la Legislatura secunde una iniciativa que hizo en Guadalajara con el fin de dar facultades extraordinarias al señor Comonfort. Hoy se sabe que el ilustrísimo señor Verea que venía desterrado para esta capital está ya en Zacatecas, donde, fue recibido bien, por el Gobernador el señor Zamora, al cual fue a visitar y después fue a pagar su visita al Colegio de Guadalupe, que es donde se halla el señor Obispo, también se dice que el padre Campa que tanto escandalo a dado con sus escritos, ha oído la voz de su pastor el señor Verea y se fue a acompañar lo al colegio de Guadalupe.

Octubre

J.1. Hoy jubileo en el Sagrario y Villa de Santiago. Hoy una mujer y un hombre entraron a la tienda que esta frente de la tienda del "Caballo Blanco" con el nombre de "Mantas del Saltillo" a comprar manta, mientras el cajero que es un sobrino del señor Aguirre, despachaba a otro marchante se salieron el hombre y la mejor, llevándose esta, una pieza de manta. El cajero viendo esto, salió a la calle con la vara de medir en la mano y habiéndolos alcanzado, quitó a la mujer la pieza de manta y le dio dos varazos. La mujer fue y se quejó al juez el señor don Antonio Hernández, el cual mandó por los dependientes y los pusieron presos en la cárcel. Hoy hubo una comida en el Hotel Iturbide, a la que asistió el señor Gobernador y otras varias personas. En la noche hubo baile en la casa del señor Barragán.

V.2. Hoy empezó la novena de San Miguel, en su villa. Hoy quisieron robar al señor don Ramón Ramos. Hoy llegó el presbítero don Telésforo Macías al Seminario, por ser vicerector de dicho establecimiento.

S.3. Jubileo en el Convento de San Agustín. En la tarde hubo vísperas en el Convento de San Francisco, y en la noche maitines, los que, aunque fueron con música, fueron en el coro y a puerta cerrada. Hoy fue denunciado el número del periódico "La Razón" perteneciente al día de hoy.

D.4. Hoy jubileo en el Sagrario. En este mismo día hubo función en el Convento de San Francisco habiendo asistido todas las comunidades. La

%p44–Vildosola–2025–10–15%

misa la dijo M.R.P.F. Manuel González y el sermón el R.P.F. Buenaventura Domínguez. En la tarde hubo función de toros. En la noche hubo retreta en el Cuartel del Carmen, por haberse mudado a dicho cuartel, los del batallón de Guanajuato. Los soldados de la Guardia Nacional, que estaban en el Cuartel del Carmen, se pasaron a la portería de dicho Convento del Carmen, donde van a establecer su Cuartel. Hoy se casó el hijo del señor don Pedro Nieva con una señora del Valle.

L.5. Hoy se abrió en la calle de la Concepción, la botica del hospital. Hoy llegó del Armadillo la señora doña Juana Morales y su familia Hoy se mudaron los juegos que estaban en la plazuela que forma, tras de la fábrica de tabacos, a la plaza de San Miguelito. Hoy dio una comida en el rancho del general Pavón, el señor licenciado don Julián Rivero. Hoy secularizó el P.F. Ángeles, franciscano de la provincia de México, el cual secularizó en esta capital. Hoy se enterró la señora doña Narcisa, tía del presbítero don Nemesio Cabañas.

M.6. Hoy estuvo malo papá de sus dolores nerviosos. Hoy al pasar una carretela en que iban varios señores sucedió la desgracia de haber pasado dicha carretela por encima de una mujer.

Mes.7. Hoy hubo en el Convento de San Francisco una misa cantada, la cual dijo el ilustrísimo señor Obispo, siendo los que tenían las capas, el guardián de San Francisco y el Prior de San Agustín y diáconos el presbítero Salcedo y el presbítero Domínguez. La iglesia estaba muy adornada y asistieron las comunidades y basta concurrencia habiendo tocado la orquesta del señor don León Zavala. La misa fue pagada por el señor licenciado Rivero, en acción de gracias a la Purísima Concepción por haber sanado de una enfermedad.

Casa de moneda - En esta capital se acuñaron en el mes de septiembre próximo pasado:

En pesos fuertes $149,305

En tostones $100

En reales $35

Suma $149,440

Con peso de 17,560 marcos, 6 onzas, 3 Ochavos. Renuncia la ha hecho el juez 1° de la Villa de San Nicolás Tolentino. La agencia la sirve gratir el señor gobernador don Eulalio Degollado. Hoy fue enterrado el señor don J.M. Álvarez Sagastegui. Hoy llega de su hacienda el señor don Pedro Sanjuan. Hoy se

%p45–Vildosola–2025–10–15%

supo que al señor don Isidro Calvillo, por no querer asistir al jurado para la denuncia del número perteneciente al sábado pasado, del periódico "La Razón" se le cobraron $5 de multa. Hoy le concedió el Honorable Congreso facultades extraordinarias al señor Gobernador. Hoy en la tarde fue un piquete de caballería a catear el Curato de San Miguelito, dicho cateo fue, por ver si encontraban ahí al señor Alfaro que dicen se halla en esta capital también dicen está el señor don Antonio Haro y Tamaríz. Además del piquete de caballeria, que entro en el Curato para el cateo, el cual fue hecho hasta en los canales de las bóvedas, sin dejar de catear también la Iglesia se mandó cercar de Celadores armados y a caballo toda la manzana que ocupa dicho Curato. Hoy fue prendido según dicen un mozo que llevaba $100 que también dicen, era para levantar fuerza en contra del Gobierno. Hoy llego de su hacienda Herculano Bermúdez.

J.8. Hoy jubileo en el Sagrario, Convento de San Francisco y Villa de Tequisquiapan. Hoy cerca de las nueve de la mañana se mandó catear la casa del señor Mascorro, para ver si encontraban al señor Alfaro y no habiendo encontrado, se pasaron a catear todas las casas de dicha manzana, siendo tanto el cateo, que buscaban hasta debajo de las alfombras; para hacer dicho cateo, fue un piquete de caballería, otro de los de la Guardia Nacional y Celadores, para secar toda la manzana habiendo puesto centinelas en las azoteas. Durante esto muchos de los que estaban, presos se llevaron presos, entre ellos a don Genaro Dávalos y también a un pobre oficial retirado habiendo los puesto presos, al primero, en la cuadra de Celadores y al segundo en el Cuartel del Carmen. El cateo siguió hasta las dos y media de la tarde sin haber podido encontrar al señor Alfaro. Hoy fue asaltada la celda del R.P. Prior de San Agustín. También al señor don Matías Parra lo asaltaron en la calle dos hombres, queriéndole quitar el reloj, pero se contentaron con llevarse la mascada. En la noche los mismos serenos, querían robar la casa del señor don Pedro Nieva, pero habiendo sido sentidos no llevaron su intento adelante. Hoy dio una comida y un baile, el señor diputado don Alejandro Nieva al señor don Ponciano Arriaga. La comida fue en una huerta y el baile en la casa del señor licenciado don Vicente Chico Sein. Hoy murió un hijo del señor don Marcelino (el músico).

%p46–Vildosola–2025–10–15%

V.9. Hoy volvieron a catear el curato de San Miguelito. Hoy hubo junta de terceros, con respecto al capítulo.

S.10. Hoy en la mañana, hubo una misa en la Tercera Orden del Convento de San Francisco, para verificar después el capítulo, habiendo salido nombrados los señores siguientes: ministro don Manuel del Conde (presbítero), ministra, doña N. Manrrique,- proministro,- don Pascual García,- proministra,- doña Trinidad Bustamante,- maestra de Novicias,- doña Dolores Almaguer, secretario,- don Jacinto Sierra. Hoy se sacramentó una de las señoras Ferriz. Hoy en la tarde, hubo vísperas en la Villa de San Miguelito y en la noche maitines habiendo habido buenos fuegos. Hoy dio el señor gobernador don Eulalio Degollado una proclama con respecto a las facultades extraordinarias concedidas por el Honorable Congreso. Hoy cesó de publicarse el periódico "La Razón."

D.11. Hoy hubo función en la Villa de San Miguelito. La misa la dijo el P.F. Antonio Mata, y el sermón el R.P.F. Manuel González. También en el Convento de San Francisco, hubo una misa contada para leer la tabla del capítulo de los Terceros, que se celebró ayer, habiendo el P. Comisario de Terceros, después de leída la tabla, dado una exhortación al proministro y a la ministra. En la tarde hubo corpus en la Villa de San Miguelito. En la noche hubo retreta en el Cuartel del Carmen. Hoy se casó el señor don Juan Aguer con una señora Francesa.

L.12. Jubileo en el Santuario. En la noche hubo baile en la casa de las señoras Arriaga, dado por el licenciado don Ponciano Arriaga.

M.13. Hoy salió el ultimo número del periódico "El Rebenque" por haber sido suspendido por el gobierno. Hoy llegó de México la familia del señor Morett.

Mes.14. Hoy dio una comida en la hacienda de la Pila el señor don José de la Luz Gómez por el cumpleaños de su señora esposa.

J.15. Hoy hubo jubileo en el Colegio de San Nicolás. También en el Convento del Carmen, hubo función en honor de Santa Teresa de Jesús. Hoy salió tropa de los del batallón de Guanajuato, para Rioverde a atacar al señor Mejía que entro en dicha población. Hoy pario un hombre la señora doña Ramona García Diego, esposa del señor don Silverio Aguilar. Hoy cerca de la oración le pegaron entre don Carlos Gordoa, y don Luis Baraja, chicotazos y palos al señor Donovan habiéndole el señor Barajas tirado un tiro con una pistola

%p47–Vildosola–2025–10–15%

el cual apenas le rozo el sombrero, dicen que dicho pleito, fue por haber tenido un resentimiento; y el ir algo ebrios. Hoy en la noche robaron dos tiendas de la Alhóndiga, habiéndose llevado de ambas tiendas dinero tan solamente.

V.16. Hoy jubileo en el Convento del Carmen. Hoy llego de México el señor don José María González Mier.

S.17. Hoy se publicó en el periódico "El liberal" una ley dada por el Honorable Congreso de Jalisco para que en el presente año no haya feria en San Juan de los Lagos, también se publicó la siguiente lista.

Ensalle de cajas del estado de San Luis Potosí.

Estado que manifiesta el número de piezas de plata para, mixta con oro y otras clases que se han introducido en esta capital, en todo el mes de agosto del año de 1857, con excepción de sus minerales de su procedencia dueños y valores.

| Introducción | Catorce | Charcas | Matehuala | Cerro de San Pedro Pura | Guadalcazar | Bajilla Pura | Bajilla quintada | Mos. de dineros recibidos | Valores |
| --- | --- | --- | --- | --- | --- | --- | --- | --- | --- |
|  |  |  |  |  |  |  |  | 219.20 |  |
| Señora D. M. Aranda | 2 |  |  |  |  |  |  | 264226 | 1808-31 |
| Parra Pereda y Ca. | 17 |  |  |  |  |  |  | 3744,067 | 20974-34 |
| Gutiérrez Co. y Ruiz | 21 | 1 |  |  |  |  |  | 37,075 | 30890-¿ |
| Don Jesús Hernández |  | 1 | 4 |  |  |  |  | 7763,019 | 3313-12 |
| Gregorio Lambarri | 52 |  |  |  |  |  |  | 719,006 | 6487-67 |
| Matías H. Soto | 5 |  |  |  |  |  |  | 218,023 | 5932-52 |
| Rafael Cataño |  |  | 5 |  |  |  |  | 249009 | 2460-94 |
| Herculano Manrique | 2 |  |  |  |  |  |  | 122,011 | 2269-40 |
| Juan B. Cerda |  | 1 |  |  |  |  |  | 130,061 | 1007-68 |
| Andrés Gutiérrez |  | 1 |  |  |  |  |  | 447,004 | 1078-81 |
| Francisco S. Lara |  | 4 |  |  |  |  |  | 7094 | 3688-1 |
| Mariano Taboada |  |  |  |  |  | 1 | 1364 | 197043 | 63-43 |
| Rafael Aguirre |  | 2 |  |  |  |  |  |  | 7299-75 |
| Totales | 99 | 10 | 9 |  |  | 1 | 1364 | 1647020 | 135,879-56 |

%p48–Vildosola–2025–10–15%

D.18. Hoy se abrió el Seminario Conciliar, habiendo habido un discurso dicho por don Francisco Rosas y después se leyeron las calificaciones de todos los alumnos de todas las clases, las calificaciones, las leyó el presbítero don Pedro Gaitán, catedrático de mínimos y menores de dicho Seminario. Hoy murió repentinamente un señor de Guadalcázar, que había venido a curar se a esta capital. Hoy se bautizó el niño del señor don Silverio Aguilar, habiendo sido padrinos de óleos, el R.P. Prior del Carmen y de manos el señor don Nicolás Mascorro.

L.19. Jubileo en el Sagrario y convento de San Agustín. Hoy se abrieron las cátedras en el Seminario conciliar. Hoy que concluyó el tiempo de vacaciones que anualmente se dan. Hoy fue sentenciado el señor don Genaro Dávalos a tres meses de prisión y $300 de multa por la denuncia del número de la "Razón" que se le había hecho. Hoy que saco el viatico el ilustrísimo señor Obispo se estrenó una cartela del señor Manrique. En este día, se pusieron los juegos en la plazuela del Montecillo, por estar en la no vena en dicha villa. Hoy en la noche se sacramento el señor don Manuel López.

M.20. Hoy le dieron de palos al señor don Ignacio Gómez.

Mes.21. Hoy empecé a asistir a la catedra de teología, supliéndonosla el señor Vice-Rector mientras llega el catedrático de dicha catedra. Hoy el señor don Francisco Alemán, dirige una carta al señor editor del periódico "El Liberal" para que la publique en su número, el cual tiene por objeto el desmentir un hecho que, habiendo llegado a sus oídos no puede dejar de desmentirlo porque dice que una persona a nombre suyo ha andado pidiendo dinero, lo cual es falso porque, aunque este preso, en la cárcel no tiene necesidad y por lo mismo se ve en la necesidad de desmentirlo.

J.22. Hoy se mandaron poner presos a los señores don Ignacio Ugalde y don Francisco Torres y otros varios; no se sabe el motivo.

S.24. Hoy jubileo en el Convento de la Merced. Hoy hubo función en la Iglesia del Sagrario, en honor del Ángel San Rafael. Hoy salió para el Venado el R.P.F. Antonio Almaguer. Hoy empezó a salir en el periódico "El liberal" una comedia escrita en verso por don Francisco de P. Palomo, cuya comedia se titula:

%p49–Vildosola–2025–10–15%

“Ilusiones de la vida o el término de un sacrificio" la cual es dedicada al excelentísimo señor ministro de guerra y marina el señor general don Juan Soto. Hoy fueron puestos en libertad los señores Ugalde y Torres. Hoy en la tarde hubo vísperas y en la noche maitines en la Iglesia de la Villa del Montecillo.

D.25. Hoy hubo función en villas del Montecillo, en honor del Señor San Cristobal.

L.26. Hoy en la noche murió de un ataque repentino el señor don Lauro Martínez.

M.27. Hoy dijo el Rectorado del Seminario el señor presbítero don Antonio Mascorro.

Mes.28. Hoy en la mañana yendo el señor don Francisco Torres a caballo y estando algo ebrio, iba corriendo y diciendo vivas y mueras. Hoy se publicó en el periódico "El Liberal" una aclaración acerca de la sentencia que acerca del número del periódico "La Razón" se le vio al señor don Genaro Dávalos, resulta este, después de varios informes, sentenciado a seis meses de prisión y $300 de multa y en el caso de no satisfacer la multa otros tres meses de prisión más. Hoy en la noche agarraron a dos mujeres con varios cartuchos, las cuales fueron puestas en las arrecogidas.

J.29. Hoy dio el señor Gobernador un decreto para que todo aquel que después de las 10 y media ande en la calle, se ponga en la cárcel. Hoy robaron al presbítero don Ambrosio Pereda.

V.30. Hoy en la mañana fuera a Catedral unos celadores a quitar las hojas de las puertas de la Iglesia, y a poner otras, no se sabe conque objeto seria tal muda de chapas. Hoy se abrió una nueva relojería siendo dirigida por el señor don Cristóbal Yáñez, la cual está en la primera calle del Parián. Hoy en la noche se han presado a varios individuos.

S.31. Hoy fueron puestos en prisión los señores Pastor, Borja y Torres no se sabe el motivo. También fue puesto preso el Cochero del señor don J.M. González, pero este fue por motivo de pleito. Hoy pusieron el juego de la ruleta, en el Bazar Potosino.

%p50–Vildosola–2025–10–15%

Noviembre

D.1. Hoy se abrieron los puestos de dulce, que anualmente se ponen en plaza habiendo habido juegos de loterías carcamanes. En la noche presaron al sacristán de la Capilla del rosario.

L.2. Hoy dicen salió en el grillete el señor don Francisco Torres.

M.3. Hoy salieron desterrados los señores don Nicolás Mascorro, y el licenciado don José Castillo. Hoy fue cateado el Convento del Carmen con el objeto de ver si ahí estaba escondido un oficial de los que estaban presos, habiendo cateado hasta la Iglesia, cuyo cateo concluyó con haberse incomodado el Gobernador con P. Prior de dicho convento. Hoy se estableció en Catedral un nuevo jubileo para cada día primero del mes, en honor de la Santísima y Beatísima Trinidad. Jubileo también en el Convento de San Agustín.

Mes.4. Jubileo en el Sagrario. Hoy salió libre don Francisco Torres, también salieron libres Borja, Pastor y el Sacristán de la Capilla del Rosario. Hoy ha salido una ensaladilla manuscrita, en la que se encuentran casi todas las personas de San Luis. Hoy se publicó en el periódico "El Liberal" una lista de las multas que se han cobrado en el mes anterior. Hoy el M.R.P. Prior del Convento del Carmen por los insultos que sufrió del señor Gobernador, el día del cateo, del Convento, pasó a ver a su Señoría Ilustrísima, con el objeto de ver si mejor se cerraba el Convento entregándole todo lo perteneciente, para irse el con su compañero (el P.F. Manuel de Jesús María) fuera, lo cual no aprobó el ilustrísimo señor Obispo, y entonces lo que hizo el P. Prior, fue mudarse del Convento a la casa de las Bustamante, asistiéndolo más del día en el Convento.

J.5. Hoy el señor don Anastasio Parra, le pego al señor don José María Cadena. Hoy a las ocho personas que venían de fuera, fueron aprendidos, cuatro de ellos se defendieron, y se fueron, y los otros cuatro fueron puestos presos y recogidos sus equipajes para registrarlos. Hoy se dice que a cada una de las personas que viven en una manzana, deben hacer ronda, la noche que los toque.

V.6. Hoy en la noche pusieron soldados, en la altura del Seminario.

S.7. Hoy salió la Guardia Nacional y unos del 3° de Caballería para San Felipe a donde dicen van a atacar al señor Mejía.

D.8. Jubileo en el Convento de San Francisco y Villa de Tequisquiapan. Hoy salió el señor don Pepe González para sus minas. Hoy en la tar

%p51–Vildosola–2025–10–15%

de hubo función de toros. Hoy dio el Gobernador una proclama.

L.9. Hoy salió un alcance al periódico "El Liberal" en que dice que el señor Mejía ha huido para la Sierra. Hoy salió para México el señor don Mariano Vega con sus hijos.

J.12. Hoy se sacramentó la señora doña Luz Mendiola, esposa del señor don Manuel Ceballos. Jubileo en el Santuario.

V.13. Hoy en la tarde llegó al Convento de San Francisco el padre Medrano. En la noche murió la señora Mendiola. Hoy se sacramentó el presbítero don Juan N. Escalante.

S.14. Hoy se enterró la señora doña Luz Mendiola. Hoy salieron fuerzas para Santa María del Rio. Hoy en la tarde presaron al señor Pardo por haber gritado muera el Gobernador. Hoy llegó el presbítero don Guadalupe de la Torre catedrático de Teología del Seminario.

D.15. Hoy pusieron preso a don Benigno Arriaga por tener parte en la en saladilla que días pasados salió. Hoy salió libre el señor Pardo. Hoy en la noche mató un sereno a un ladrón que, después de haberlo agarrado se le huyo, por cuya Razón le tiro un tiro, más por este tiro, se mandó suspender la retreta, por temor de que no fuera otra cosa. Hoy llegó de México el hijo del señor don Andrés Barroeta. Jubileo en el Colegio de San Nicolás.

L.16. Hoy se fue el señor licenciado don Francisco Guzmán para los Ranchos. Hoy llego de México el señor don Severo Lechón. Hoy se tomó el dicho el señor don Florencio Cabrera. Jubileo en el Convento del Carmen.

J.19. Hoy dio el señor Gobernador un decreto prometiendo toda clase de juegos. Hoy murió el señor don Manuel Palafox. Hoy hubo en el Sagrario y Convento de San Agustín.

D.22. Hoy en la mañana hubo función el Convento de San Francisco costeada por los músicos dicha función fue en honor de Santa Cecilia patrona de los músicos. Hoy hubo honras en el Sagrario, por el alma de presbítero don Juan N. Escalante, habiendo habido conducido el cadáver después de las honras al Camposanto donde fue sepultado. Hoy en la tarde hubo función de Toros.

M.24. Jubileo en el Convento de la merced. Hoy hubo función en el Convento del Carmen. En la tarde llegó del Venado el P.F.A. Almaguer. Hoy se fue para la hacienda de Guascamá, el R.P.F. José Cabral a dónde va a hacer el novenario a la Purísima. También se fueron para dicha hacienda el Señor

%p52–Vildosola–2025–10–15%

don Anastasio Parra y su señora.

Mes.25. Hoy se publicó en el periódico "El Liberal" lo siguiente: Corte de caja se compone de los siguientes: presidente, el excelentísimo señor don Benito Juárez, Magistrados - don Santos Degollado - don José María Cortés y Esparza - don Miguel Lerdo de Tejada - don Manuel F. Álvarez - don José María Lacunza - don Esequiel Montes - don J.M. Hernández - don J.M. Iglesias - don Antonio Bruchili - don Ignacio de Llave; supernumerarios - don Manuel Baranda - don Gregorio Dávila - don Joaquín Angulo - don Florentino Mercado; procurador general - don León Guzmán; fiscal- don Juan Antonio de la fuente. Ha sido declarado presidente de la república mexicana el excelentísimo señor don Ignacio Comonfort.

J.26. Hoy en la noche se tomó las manos el señor don Florencio Cabrera con la señora doña Manuela Otahegui, habiendo habido muy buen baile durante toda la noche.

V.27. Hoy en la mañana se velaron en el Santuario el señor don Florencio Cabrera y la señora doña Manuela Otahegui.

D.29. Hoy se comenzó el novenario a la Purísima en el Convento de San Francisco. También en Catedral se le comenzó a hacer otro novenario a la misma imagen.

L.30. Hoy sacaron de su casa al señor don Estanislao Blanco, habiéndolos sacado en una camilla por estar enfermo, y de este modo el juez don Hilario Tena lo mandó poner preso por una deuda, cuyas deudas, aunque sus amigos la pagaban no quiso darlo libre dicho señor juez. En la tarde de este día, bendijeron al Señor de la Misericordia del Montecillo. La bendición fue en el Sagrario habiendo prendido un harbol de cohetes, despues de la bendicion. Tam bien cuando lo colocaron en la Iglesia del Montecillo, repicaron y tiraron cohetes. La colocación fue en la misma tarde. En la misma tarde dio libre el señor juez al señor Blanco.

Diciembre

M.1. Hoy murió el señor don el Estanislao Blanco. En la noche a las ocho tocaron a quemazón en casi todas las Iglesias, habiendo empezado en Catedral, dicha quemazón fue en la caballeriza de la casa donde está la tien

%p53–Vildosola–2025–10–15%

da del Ancla. También en esta misma noche hubo serenatas en la Plaza de Armas y Cuartel del Carmen, por la tomada de posesión del presidente de la república.

Mes.2. Hoy en la tarde, salió un bando por haber derrotado el Señor Do blado a unos pronunciados.

J.3. Jubileo en el Convento de San Agustín. Hoy empezó el novenario a María Santisima de Guadalupe en su Santuario.

V.4. Hoy hubo jubileo en el Sagrario.

D.6. Hoy en la tarde hubo función de Toros.

L.7. Hoy en la tarde hubo vísperas en las Iglesias de San Francisco y Catedral, en honor de la Purísima y por la noche maitines en ambas partes.

M.8. Hoy hubo función en el Convento de San Francisco y Catedral en honor de la purísima, el sermón en la primera iglesia lo dijo el R.P.F. Buenaventura Domínguez. Hoy salió tropa para Rio verde a donde dicen esta Mejía. También dicen que el señor Degollado pidió licencia al congreso para ir a atacarlo, pero no se le concedió. Hoy hace algunos días, salió una defensa del señor Degollado hecha por el señor diputado Gascón. Hoy en la tarde, en el paseo del Santuario, tumbó el caballo al hijo más chico del señor don José María Aguirre, al cual lo trajeron para su casa en un coche. Hoy en la noche hubo retreta.

Mes.9. Hoy empezó el octavario de la Purísima, en el Convento de San Francisco.

J.10. Hoy en la tarde salió una música, la cual la sacó el señor don Agustín Adanto formando burla, como por aniversario del pronunciamiento del día 10 de diciembre del año pasado.

V.11. Hoy en la tarde, hubo vísperas en el Santuario de Guadalupe y en la noche maitines. Hoy murió la señora doña Juana la Costa. Hoy se fue para el Peñasco el R.P. guardián de San Francisco.

S.12. Hoy en la mañana, hubo función en el Santuario de Guadalupe, habiendo dicho la misa el ilustrísimo señor Obispo, y el sermón el presbítero don Mariano Saldaña a la función asis

%p54–Vildosola–2025–10–15%

tieron todas las autoridades y empleados, habiendo ido la tropa de caballería e infantería, durante la misa, hubo tres descargas. En la tarde procesión habiendo habido antes de la procesión, un pleito entre el señor Oriol y el señor Musurrutia, a los cuales trajo la patrulla que andaba en el Santuario. En la noche hubo retreta en el Cuartel del Carmen.

D.13. Hoy en la mañana hubo ordenes menores en el Obispado. En la tarde hubo función de toros y en la noche retreta. También hubo baile en la casa de la señora doña Guadalupe Otahegui.

L.14. Hoy en la noche hubo en la Tercera Orden rosario cantado por la función de nochebuena (chiquita) estando la Iglesia muy adornada. Después del rosario, salió la procesión como es de costumbre. Hoy llego del Peñasco el padre guardián de San Francisco.

M.15. Hoy hubo función en Tercera Orden, habiendo predicado el P.F. Buenaventura Domínguez. Hoy condujo el octavario de la Purísima en el Convento de San francisco, habiendo ido a tocar hoy todo el día la música de los Zacatecanos. Jubileo en el Colegio de San Nicolás.

Mes.16. Hoy hubo jubileo en el Convento del Carmen. Hoy en la mañana hubo función en el Convento de San Francisco, dedicada a la Purísima, la cual la costearon los artesanos, habiendo habido jubileo, y en la noche hubo procesión habiendo sacado a María Santísima

J.17. Hoy en la noche hubo retreta en el Cuartel del Carmen.

V.18. Hoy hubo junta en la Tercera Orden.

S.19. Jubileo en el Convento de San Agustín y en el Sagrario. Hoy convidaron para los exámenes de la escuela del señor Severin. En la noche se sacramento la esposa de don Bartolo Zertuche.

D.20. Hoy en la mañana, hubo ordenes de epístola en el Obispado. En la tarde, hubo función de toros. En la misma tarde se mudaron los soldados que estaban en el Cuartel del Carmen al Convento de Francisco, habiendo mudado bastante parque y tres piezas de artillería, no se sabe porque se habrán mudado. En la noche hubo retreta. Hoy se dice que México está pronunciado.

L.21. Hoy han seguido mudando parque al Convento de San francisco.

%p55–Vildosola–2025–10–15%

Hoy se reunió el Congreso para decretar que debía hacer el señor Gobernador, si sostenerse o pronunciarse como dicen que piensa hacer el señor Morett, y el congreso lo que hizo fue, dejarlo al árbitro del señor Gobernador para lo que le dieron facultades extraordinarias.

M.22. Hoy todavía siguen mudando parque y cureñas, al Convento de San Francisco. Hoy hubo examen en el establecimiento que dirige el preceptor don Casimiro Severin.

Mes.23. Hoy hubo examen en la misma escuela que dirige el señor Severin. Hoy salió una proclama del señor Degollado, en que dice no se pronuncia, y sostendrá el partido Liberal. Hoy no salió el periódico "El liberal" por estar puesta la planta con folletín en el que iba a salir, el sermón que el día 12 predicó en el Santuario el presbítero don Mariano Saldaña, más como dicho padre no quiso que el sermón saliera en folletín, sino en las columnas del periódico no salió ningún periódico.

J.24. Jubileo en el Convento de la Merced. Hoy empezaron en el Seminario las vacaciones chiquitas que anualmente se dan también en este día pidieron su aguinaldo los Serenos como siempre lo han hecho. En la noche, hubo misas de Gallo, en el Convento del Carmen y en Catedral, habiendo habido en esta última, rosario cantado, el cual fue antes de las ocho.

V.25. Hoy en la noche hubo comedia en el Colegio, habiendo representado la pieza titulada: “Don Juan de Austria”. También en esta misma noche salieron los carros del Montecillo de la Nochebuena, que anualmente salen pasando por las calles de la estación. Hoy fue la repartición de premios en la Escuela del Señor Severin.

S.26. Hoy en la tarde entro la tropa que había ido a Rioverde a atacar a Mejía habiendo detenido en el Convento de San Francisco a 50 hombres de los de la Guardia Nacional, que venían con los de caballería y los de Guanajuato. Hoy dicen que el señor Comonfort salió de México a atacar a Doblado por decirse que dicho señor fue a México, y habiendo quedado de secundar el pronunciamiento para lo que le dieron armas y dinero; más al llegar a su estado no

%p56–Vildosola–2025–10–15%

lo hizo. Hoy salió un manifiesto del Honorable Congreso de la Unión. En la noche, hubo comedia en el Colegio representando la comedia de ayer. En esta noche habiendo salido una pacotilla insultando, en la cual iba don Telésforo Sustaita, habiendo encontrado a don Pilar Bustamante, lo insultaron más este, les pego a casi todos de bofetadas (según dicen). Hoy murió don Benigno Ruvalcaba.

D.27. Hoy hubo Ordenes de Evangelio en el Obispado. Hoy cerca de las dos de la tarde, se pronunció el señor Morett habiendo dado libres a los señores don Manuel Calvo y don Juan Othón, que estaban presos en el Convento de San Francisco. Los soldados de Guanajuato salieron para su estado por no querer haber secundado el pronunciamiento, al momento se fijaron en las esquinas las proclamas, habiendo dado el señor Morett una al ejército y otra al pueblo. Salen patrullas y anda en contestaciones con el señor Degollado el cual resuelve que al día siguiente se decidiría, si secundaba o no, y ponía este término por tener que reunir el Congreso. Cerca de las cinco de la tarde después de varias comunicaciones, entro el señor Alfaro con alguna fuerza, habiendo le gritado vivas Habiéndoles reunido bastante gente, pusieron de estos mismos que se presentaban, centinelas en las esquinas inmediatas al Convento de San Francisco. También dicen hubo en esta tarde algunas muertes entre ellas, un oficial del 3° de Caballería y el alcalde del Montecillo. En la noche hubo algunos tiros.

L.28. Hoy en la mañana, hubo un repique en todas las Iglesias excepto el Carmen, pues este punto, es el que tenían los nacionales. Cerca de las 10 de la mañana, hubo algunos tiros de los del Carmen a San Francisco. Dicen, se fue el señor Degollado al Consulado Inglés. Cerca de las dos de la tarde, se salieron los soldados de la Guardia Nacional, que estaban en el Carmen, unos armados y otros sin armas, habiendo dejado solo, el Cuartel de todo el parque que tenían, luego que supieron esto, los de caballería se salieron a atacarlos, más como los nacionales no hicieron resistencia, los trajeron y los pusieron en el Convento de San Francisco. Hoy es nombrado prefecto el señor don Juan Othón. Hoy se mandaron cerca de 50 hombres, al Convento del Carmen para defender dicho punto. Hoy en

%p57–Vildosola–2025–10–15%

noche salieron varios gritando Vivas y Mueras. También fueron a la casa del señor licenciado don Félix R. Gómez a apedrearla y a gritarle insultos. También al licenciado don Manuel Patiño fueron a buscarlo, un oficial y unos celadores, pero no lo encontraron, tampoco sabe con qué objetivo lo irían a buscar. Hoy en la noche hubo comedia en el Colegio habiendo representado la pieza titulada: "Honra y Provecho."

M.29. Hoy en la noche, se volvió a representar en el Seminario la comedia de ayer. Hoy murió la esposa de don Antonio Martínez (el Sastre). Hoy salió de San Luis don Eulalio Degollado.

M.30. Hoy en la noche se representó en el Seminario, la comedia titulada: "La Rueda de la fortuna." También en esta misma noche, hubo pastorela en el Coliseo. Hoy se quitaron del Carmen los soldados que estaban guardando dicho punto. Hoy yendo para su casa el señor don Pilar Bustamante, le encontró un hombre, el cual después de saludarle, le insultó y concluyó con tirarle un tiro, con un rifle, cuyo tiro, por fortuna no le pego, más después de haberle tirado corrió.

J.31. Hoy en la noche, hubo sermón en Catedral predicado por el señor Gutiérrez, habiendo estado su Majestad patente durante el día.

Fin del año de 1857.

%p58–Vildosola–2025–10–15%

Año de 1858

Enero

V.1. Hoy hubo jubileo en el Sagrario, Villa de Santiago, y Convento de la Merced, sacando en esta última, en la tarde, a Nuestro Amo por los claustros y el Cementerio. La negociación del señor don Manuel Vejo hijo, fue tratada de embargar por sus acreedores, porque se tiene desconfianza de que no vuelva de viaje que hizo México. El juez, que tuvo conocimiento de esto, pasó balance a la tienda dejando depositado todo en ella, hasta que se sepa que es lo que ha acontecido al Señor Vejo. En la noche, hubo pastorela en el Teatro. También en el Colegio hubo comedia, representando la comedia titulada "La Rueda de la fortuna". En la mañana hubo órdenes en el Obispado.

S.2. Hoy comenzó el nuevo periódico del gobierno, titulado "El Registro oficial" Han sido nombrados magistrados, que han de componer el tribunal de justicia, los señores siguientes licenciado don Tirso Vejo, licenciado don Guadalupe de los Reyes, licenciado don Vicente Chico Sein, licenciado don Joaquín Reyes, licenciado don Julián Rivero, licenciado don Jesús H. Soto y fiscal don Antonio E. Valdés. Para suplentes son nombrados los señores siguientes: licenciado don Gerardo García Rojas, licenciado don Luis Guzmán, licenciado don Juan Ortega, licenciado don Manuel Castañeda, licenciado don Rafael E. Sousa, licenciado don Pomposo Cepeda. Para el consejo del Estado son nombrados los señores siguientes: licenciado don Ramón Adame, señor don Tomás O. de Parada, licenciado don Miguel Lazo, doctor don Joaquín López Hermosa, don Nicolás Mascorro. Para suplentes: don José María Tornel, don Francisco Bermúdez, don Paulo Verástegui, licenciado don Florencio Ávila, don Felipe Monjarás. Hoy se sabe que el señor Degollado, está en Cerritos donde está reuniendo gente. En la noche hubo comedia en el Seminario representando la pieza titulada: "No gano para sustos" la cual no acabaron de representar, porque varios de los concurrentes les empezaron a chiflar.

D.3. Jubileo en el Convento de San Agustín. Y en la noche hubo pastorela en el teatro.

L.4. Jubileo en el Sagrario. Hoy salió un piquete de caballería al

%p59–Vildosola–2025–10–15%

mando del señor general Cruz, cuya fuerza fue a atacar al señor Degollada que dicen que está en Charcas.

Mes.5. Hoy en la noche, hubo comedia en el Seminario, la cual fue la última.

Mes.6. Hoy se huyó el Mozo y Soledad de la casa de Paz. Hoy hubo pastorela en el teatro.

J.7. Hoy se abrieron las cátedras en el Seminario. Hoy a las cinco de la tarde se sacramento el señor licenciado don Antonio E. Valdés. A su Majestad lo sacó el ilustrísimo señor Obispo, habiendo salido del Convento de San Francisco.

V.8. Jubileo en el Convento de San Francisco, San Agustín, Sagrario y Villa de Tequisquiapan. Hoy salió un impreso con el titulado de “La Sombra de Don Julián”. También salió otro el cual tiene por objeto el contestar el periódico de Monterrey, cuyo papel lo firma el señor Mesquia.

S.9. Hoy aparecieron en las esquinas pasquines con caricaturas y un verso, dirigidas al señor Mesquia. Hoy en la tarde hubo vísperas y en la noche maitines en el Sagrario.

D.10. Función solemne en el Sagrario, asistieron las Comunidades. La misa la dijo el presbítero don Mariano Ortiz, el cual hoy, fue su primera mesa, y el sermón lo dijo el presbítero don Mariano Saldaña. Los padrinos del nuevo cantamisano fueron, de capas, los presbíteros licenciado don Manuel del Conde, y el presbítero don Ambrosio Pereda. y de manos el señor don Pascual García y don José María Othón. En la tarde, murió el señor licenciado don Antonio E. Valdés. En la noche, sacaron en procesión a la Purísima, la cual salió del Sagrario.

L.11. Hoy llegó de Gogorrón, la señora doña Jesús Lemus viuda del señor don Ignacio Legorreta, cuya señora paró en la casa de Paz. Su cuñado el señor don Cayetano Legorreta, se fue para México donde va a continuar sus estudios.

M.12. Hoy salió el ilustrísimo señor Obispo y el cabildo eclesiástico; salieron en procesión con San Pedro, para el Santuario de Guadalupe adónde van a dar gracias, por ser primer día 12 del año.

Mes.13. Hoy llego del Valle el señor licenciado don Ponciano Arriaga.

%p60–Vildosola–2025–10–15%

V.15. Jubileo en el Colegio de San Nicolás.

S.16. Jubileo en el Convento del Carmen.

D.17. Concierto en el Teatro, y retreta en la plaza.

M.19. Jubileo en el Convento de San Agustín y en el Sagrario. A las 10 de la noche de este día, se disparó un cañonazo, dando después un repique en Catedral, por cuya Iglesia siguieron repicando las demás, dicho repique, fue por haberse pronunciado el señor general Alfaro, por las Bases orgánicas y Santa Anna.

J.20. Hoy salió Paz, fuera de San Luis. Hoy pusieron preso al general Morett, habiendo mandado rodear su casa con soldados, pues la tenía por cárcel. Al señor Aguirre, también le mandaron rodear su casa, y al señor Hidalgo; pero a dichos dos señores ya no los encontraron en sus casas. Hoy se pusieron soldados en el Convento del Carmen y en el Seminario. Hoy se encargó del Gobierno el señor don Juan Othón.

V.21. Hoy se encargó del Gobierno el señor don Nicolás Mascorro, por haber renunciado el señor Othón, siendo Secretario el señor don de Florencio Ávila. También hoy se encargó de la Prefectura el señor don Manuel Arriola. Para Administrador de Correos, ha sido nombrado el señor don Pedro Sámano.

S.22. A las diez de la mañana, hubo un solemne repique y dianas en los cuarteles, por saberse que México fue tomado ya, por el Señor Osollo. Se dice que en México hubo mucha mortandad, porque, habiendo el señor don Luis G. Osollo pedido parlamento, el cual fue concedido, al tiempo de ir el parlamentario el cual fue él, le hicieron un fuego muy vivo el enemigo, del que apenas pudo escapar la vida, pero en el acto, volvió a su cuartel y con una columna de sus soldados, pudo penetrar a Palacio. El señor Comonfort, se escapó por una puerta falsa en compañía de otros, se cree tomo por Zamplante. Hoy en la noche hubo pastorela en el teatro.

L.24. El señor Gobernador, da a sus conciudadanos una proclama. El señor Alfaro da una nueva acta del pronunciamiento, la cual tiene algunas reformas, y en otro papel con el título de "Boletín" inserta la comunicación de Mejía, la cual tiene

%p61–Vildosola–2025–10–15%

por objeto el dar noticia de la toma del Palacio de México. A las once salió el bando para publicar la nueva noticia, y la nueva reforma del plan del pronunciamiento, habiendo habido repiques, y salvas, en el bando marchó la tropa y salió el Ayuntamiento. Por la tarde, que andaba la comisión por la Villa de Santiago, los indios se les sublevaron y mataron a algunos. Hoy se mudaron los soldados que estaban en San Francisco, al Cuartel de Carmen, dejando al Convento de San Francisco para levantar un nuevo cuerpo de flanqueadores. En la noche hubo retreta.

M.26. Hoy es nombrado juez primero de letras el señor don José Castillo. Hoy salió para Villela el señor licenciado don José María Esparza Pereda.

Mes.27. Salió un boletín extraordinario, cuyo papel da noticia de lo que paso en México, el día 22 de enero: el cual dice que, el señor Osollo y Miramón, tomaron la Acordada, Hospicio, Corpus Cristi, San Juan de Dios, y Santa Veracruz, y que en la noche se adhirieron las tropas del señor Comonfort, al pronunciamiento. Y que el señor Comonfort, ha salido fuera de la capital. Hoy se ha encargado de la imprenta del gobierno, el señor don Abrahan A. Exiga. Hoy ha sido nombrado tesorero departamental el señor don Marcos Pérez.

J.28. Hoy se ha encargado del gobierno el señor Alfaro. Se dice que Parrodi con 2000 hombres a salido de Guadalajara para esta capital.

V.29. Se ha encargado de la secretaria del Gobierno, el señor don Francisco Bermúdez.

L.30. Hoy han amanecido muchas fortificaciones, por cuya Razón. muchas familias se han salido fuera, por decirse que el señor Parrodi se acerca. En este día nos fuimos a los Ranchos.

D.31. Continúan haciendo las fortificaciones, y muchas familias saliéndose. Las fortificaciones están del modo siguiente. Un fortín en la puerta del campo de San Francisco. otro, en la esquina de la casa del padre Cabañas. Otro, en la puerta de la casa del padre Cabañas. otro, en la esquina de la platería de don Lean

%p62–Vildosola–2025–10–15%

dro, otro, en la esquina de la tienda de don Silvestre Portillo, otro en la esquina de la casa de Sousa, (el medico) otro, en la esquina del Cuartel de la Artillería, otro, en la plazuela que divisa a la plaza de toros, otro, en la esquina de la casa de don Ramón Saavedra, otro, en la esquina de la aduana, otro, en la es quina de San Juan de Dios, otro, en la esquina de la tienda de Garaña, otro en la esquina de la tienda del Moro, otro, en Cochera de Nuestro Amo, otro, detrás del cuartel de la estacada, otro, en la calle de Maltos, otro, en la del apartado, y otro en la calle de cocheros.

Febrero

L.1. El jubileo que, en este día, debió de haber sido en el Sagrario se hizo hoy en los Ranchos, estando allá los presbíteros don Nicanor Cabañas, el señor cura Conde, y el padre Morales. El día de hoy en la Villa de San Sebastián, se dice que estando en misa, corría la gente metiéndose algunos al presbiterio, la causa de este alboroto, la ocasiono una comisión que fue a coger gente, queriéndose introducir a la Iglesia. El padre Saldaña cuando acabo la misa, dijo que no se saliera la gente, pero los soldados le pedían al Padre fusiles que decían tenía él. El Padre les dijo que él no tenía nada y que, si querían, pasaran a registrar. En Tequisquiapan también hubo alboroto, pues fueron a sacar a porras, a una casa donde había muchas familias, él se escondió y afortunadamente no lo allaron.

M.2. Hoy en la Villa de los Ranchos, hubo función de la candelaria. La misa la dijo el señor Cabañas, y predico el señor cura Conde. Se dice que el señor Parrodi mando pedir la plaza de San Luis y que el señor Othón, salió de parlamentario a verlo a la Pila donde se encuentra.

Mes.3. Hoy parió una niña la señora doña Ignacia Delgado, esposa de don Buenaventura Carrillo. Se dice que en San Luis pusieron preso a

%p63–Vildosola–2025–10–15%

don Luis Lara, que los fortines están casi concluidos y que no dejan entrar ni salir gente.

J.4. Hoy se ha oído un repique y salva en San Luis, y se dice que es por la bendición de los fortines que, con la música sacaron a los padres de San Francisco, los oficiales y anduvieron en todos los fortines. Hoy se enfermó la mujer de don Gabriel Limón.

V.5. Hoy se sabe que Parrodi con las fuerzas que traía a su mando, se ha retirado para el Valle, por orden que ha recibido para que se vaya a Celaya. Hoy llegó a los Ranchos don José María Aguirre y su hijo, el cual trae la noticia de la retira da de Parrodi: Hoy se han ido varias familias para San Luis A las 10 de la noche, se oye mucho ruido de gente en la calle, ladran los perros y se oye ruido como de armas, todo esto paso entre 10 y 11 de la noche, después se oyen gritos y a poco un toque como a quemazón con la campana mayor toda la villa se puso en movimiento. Después se supo que todo esto, fue ocasionado por la ronda que fue desarmada al salir, por más de 50 bandidos, y que encerrando a los de la ronda, y armando y echando fuera a unos presos que había en el juzgado, fueron en seguido a robar la casa que ocupaba don Buenaventura Carrillo, en compañía del señor Iñiga. Cuando tocaron la campaña fue cuando ya casi habían acabado el robo, puesto que, si la han tocado antes, se apoderan los ladrones de ella, y hubieran robado tal vez la villa entera. El robo fue de algunas cosas considerables, también se llevaron un caballo del padre Morales, otro del padre Cabañas, y dos del señor Rodríguez.

S.6. A las 4 de mañana se oyó una descarga de fusilería toque de corneta y gritos, lo cual era tropa que vino de San Luis a dar auxilio y para amedrentar, habían tirado una descarga. Hoy a las dos de la tarde nos venimos para San Luis. Hoy parió la señora de don Ricardo Espinosa. Hoy falleció en la hacienda de San Cristóbal, doña Guadalupe Bermúdez esposa del señor don Francisco Palomo.

%p64–Vildosola–2025–10–15%

D.7. Hoy se dice parió en la Sauseda, la esposa de don Blas Pereda.

L.8. Hoy han comenzado a componer los fortines.

M.9. Hoy es nombrado don Narciso Alday, recaudador de rentas y contribuciones. Se ha derogado la ley de desamortización y están las cofradías recogiendo sus fincas.

Mes.10. Hoy se dice que Parrodi se halla en San Juan del Río.

J.11. Hoy llegó Paz. Hoy han salido fuerzas para atacar a Zayas que se encuentra en Catorce, y a Degollado que por los puntos que pasa va saqueando.

V.12. Intentaron hoy robar los Ranchos, pero afortunadamente no hicieron nada.

S.13. Hoy llego de Villela el licenciado Esparza. Hoy llego de México el hijo de don Manuel Vejo, de cuyo camino dicen fue robado.

D.14. Hoy hubo circo en la tarde. Hoy, aunque se ha empezado el Carnaval, no hubo máscaras como siempre, tan solamente uno que otro baile, dándole a Alfaro uno en la Lonja. Hoy corrieron la voz los centinelas a las ocho y media.

L.15. Hoy robaron la Villa del Saucito, y también fue tratada de robar la hacienda del Pozo de Luna perteneciente al señor don José María Coca el cual tenía gente armada en prevención, y viendo esto, los ladrones huyeron. Hoy se casó Soledad, criada que fue de Paz, caso con el mozo que se la robó, señor Faustino. Hoy pusieron preso al señor don Ignacio Gómez, en la cárcel pública.

M.16. Hoy se casó el hijo del Conde del Peñasco el señor don Manuel Espinoza, con la señora doña Carmen Parra hija del señor don Anselmo Parra. También hoy se casó el hijo del licenciado don José María Esparza, don Pepe Esparza, con la señora doña Guadalupe Palafox.

Mes.17. Hoy ha sido nombrado para Administrador del Hospital el señor don Victoriano Galindo. Hoy hubo sermón en el Convento de San Agustín y Catedral por empezarse hoy las tandas de los sermones de Cuaresma. Hoy, recibió el destino de contador de la moneda el señor Casimiro Seferino. Hoy se ha vuelto a encargar de la imprenta del gobierno el señor don Antonio Luna.

%p65–Vildosola–2025–10–15%

J.18. Hoy salió el segundo número del periódico "El Boletín" donde insertan el préstamo forzoso que en 28 de enero se le impuso al comercio, cuya suma es de $23000 entre 32 personas. También se publicó un decreto para que se prohíba la venta de pólvora, sino se tiene la licencia necesaria. Hoy por estar en conversación Paz con el licenciado Castillo, de cosas de política, dio aviso otra persona y mandaron poner preso a Paz en la Cárcel pública. Hoy se le dio la orden de destierro al licenciado don Félix R. Gómez. Hoy salió libre don Ignacio Gómez. La fuerza que fue a atacar a Zayas a Solís fue derrotada habiendo agarrado preso al general Cruz, y también mataron a don Atanacio Portillo e hirieron a Alemán, y hubo algunos otros muertos y varios heridos. Hoy llegó de Santa María del Río don Nicanor Lobo.

V.19. Hoy por empeños de varios señores y en particular de Don Nicanor Lobo, se dio libre a Paz con la condición de que hoy mismo salga para Santa María, en compañía del señor Lobo.

L.20. Hoy salió Severiana y la familia para Carranco. Hoy secundo el plan de pronunciamiento San Miguel de Allende.

D.21. Hoy llegó de Santa María el señor Lobo, el cual se va a encargar de la Prefectura del Estado. En la tarde hubo circo. Hoy hubo sermón en el Carmen, Catedral, Villa de San Sebastián y Villa de San Miguelito. Hoy murió doña Francisca Ulibarri.

L.22. Hoy tomó posesión de la prefectura el señor don Nicanor Lobo. Hoy trajeron del Rancho de Morales, unos ladrones presos, entre ellos a algunos muertos. Hoy ha sido nombrado Administrador del Hospital al señor don J.M. Monjarás por haber renunciado dicho empleo don Victoriano Galindo.

M.23. Hoy ha circulado un impreso anónimo (con el título de Ignacio Comonfort a sus conciudadanos) la cual no es más que una crítica que hacen al señor Comonfort de todo el tiempo que estuvo de presidente de la república. Se dice que Comonfort ha llegado a Nueva Orleans, y que por Veracruz se acercan buques con españoles.

%p66–Vildosola–2025–10–15%

Mes.24. Jubileo en el Convento de la Merced, y sermones en San Agustín y Catedral. Hoy convidaron para las honras de don Atanacio Portillo.

J.25. Hoy hubo honras en el Convento de San Francisco, por el alma de don Atanacio Portillo, habiendo concurrido mucha gente.

V.26. Hoy se sabe que las fuerzas de Parrodi están cerca de las del señor Osollo, se cree que será muy pronto el desenlace. A las ocho de la noche hubo un repique salvas y dianas por la noticia de haber secundado Tampico, el plan de Tacubaya.

S.27. Hoy se avisa a los acreedores de don Manuel Vejo (hijo) para pagarse con lo que hay en su negociación, porque dicho señor se ha presentado en quiebra.

D.28. Hoy en la tarde hubo sermón en el Carmen, Villa de San Sebastián y de San Miguelito, y por la mañana en Catedral. En la misma tarde de hoy hubo función de circo.

Marzo

L.1. Hoy una mula le dio una patada al hijo de Mariquita García. Hoy pario la mujer de Genaro Dávalos.

M.2. Hoy se bautizó el niño de Genaro, habiendo sido su padrino el ilustrísimo señor Obispo. Hoy se dice que las fuerzas de Zayas se han acercado hasta el Garabatillo, y algunas familias se han salido fuera. Hoy se dice que una bóveda del Convento del Carmen de Celaya, se desplomo por haber disparado en dicho lugar, una pieza de 24. Hoy en la tarde, sermón en la Merced y Villa de Tlaxcala.

Mes.3. Hoy jubileo en San Agustín.

J.4. Jubileo en el Sagrario. Hoy salió para el Valle mi tío don Francisco y su familia.

V.5. Hoy una escolta que salió al mando de don Manuel Guerra y Vega, ha derrotado a una pacotilla de los de Degollado habiéndoles quitado fusiles y un prisionero vestido de meco el cual mandaron a la Cárcel. Sermón en el Convento de San Francisco.

S.6. Hoy derrotaron a unos que querían robar en los ranchos habien

%p67–Vildosola–2025–10–15%

do traído a algunos heridos.

D.7. Sermón en Catedral. Desde hoy empezaron a ir a misa los soldados cuya misa es en el Convento de San Francisco a las 10 y con música. Hoy a las 11 hubo un repique general salvas, y dianas por la noticia del pronunciamiento de San Juan de los Lagos. En la tarde hubo sermón en el Carmen, San Sebastián y San Miguelito.

L.8. Jubileo en el Convento de San Francisco Sagrario y Villa de Tequisquiapan. Hoy murió casi repentinamente don Juan Escandón. Hoy llego de México el señor don Gregorio Sánchez.

Mes.10. Hoy llego un parte el cual dice que, ya dispuesto el señor Osollo el día siete para el día ocho emprender el ataque, a las fuerzas de Parrodi, Zamora, que estaban fortificadas en Celaya se encontró con la plaza sola, habiendo dejado cañones de Grueso calibre y otras varias cosas de pertrechos de guerra. Mas después de haberlo arreglado todo en Guanajuato, de cuyo estado fue nombrado gobernador el señor licenciado Chico y Alegre. se marchó el señor Osollo para Salamanca cuyo rumbo parece tomó el enemigo. Por tan plausible noticia se repico, en los Conventos, hubo dianas salvas, salió música por las calles, tiraron cohetes en casi todas las casas, y en la noche hubo iluminación habiendo iluminado hasta los fortines. También hubo serenata en la Plaza.

V.12. Por extraordinario del señor Gobernador de Guanajuato se sabe que el señor Osollo, habiendo encontrado a las fuerzas de la coalición las derroto completamente, por cuya noticia se repicó y se solemnizó como la de ayer. Hoy en la noche se sacramentó doña Jesús Garate. En el Armadillo hubo su alarma, el día 10 después el repique por el triunfo de Osollo. Jubileo en el Santuario.

S.13. Hoy siguen las iluminaciones y retretas. Hoy hubo sermón en el Convento de San Francisco.

D.14. Hoy. salió el tercer número de “La Reacción” donde ponen las comunicaciones que quitaron al correo del señor Parrodi. También ponen, los recibimientos que el bello sexo manifestó al señor Osollo.

%p68–Vildosola–2025–10–15%

L.15. Hoy se sacramentó don Ignacio Lara. Hoy da el señor Othón un impreso en que manifiesta la conducta que ha observado desde el pronunciamiento de 1856 hasta la fecha.

M.16. Hoy ha habido muy buena función en el Convento del Carmen por haberse acabado la compostura de dicha Iglesia. También en Catedral hubo función en acción de gracias por el triunfo del señor Osollo.

M.17. En la noche hubo serenata. Hoy murió la mujer de don Agustín Aguado.

J.18. Hoy se pronunció la ciudad de Jeréz, por el plan de Tacubaya. En la noche vino música de las villas a felicitar al señor Alfaro por ser el día de mañana día de su santo. En la tarde de hoy el hijo del señor Alfaro que andaba a caballo y queriendo brincar un fortín, lo volteó habiendo lastimado.

V.19. Jubileo en San Agustín, el Carmen, y Sagrario Hoy murió don Jesús Garate. Hoy en la noche hubo serenata. También se le iba a dar un baile al señor Alfaro, el cual no lo hubo por tener a su hijo enfermo.

D.21. Hoy hubo misa de tropa en San Francisco.

M.23. Hoy llegaron de su hacienda las señoras Terán. Hoy se sabe que Guadalajara está pronunciado por lo que hubo repiques.

Mes.24. Jubileo en la Merced. Hoy se casó don Rafael Castillo con una hija de don Mariano Aguilar. Hoy en la noche robaron por la Alhóndiga una casa de un tal Rangel.

J.25. Hoy en la noche, hubo alarma por lo que se mandaron poner soldados en los fortines.

V.26. Hoy por ser viernes de Dolores hubo tres horas en San Francisco y en el Carmen. Hoy llegó de México don Severo Lechón.

S. 27. Hoy mataron a don Ignacio Ugalde, una patrulla de los de Degollado, también en Gallinas, mataron a don N. Maza.

D. 28. Hoy bajo el señor del Refugio como es costumbre por ser Domingo de Ramos, más esta bajada fue por la mañana, por tomar de que, si bajaba por la tarde, como es costumbre, no fueran a

%p69–Vildosola–2025–10–15%

entrar los de Degollado.

L. 29. Hoy salió la procesión de Cátedras habiendo salido el señor del Refugio. Hoy dicen que cerca de 200 hombres entraron al Armadillo habiéndose llevado al padre Morales.

M. 30. Salió la procesión de San Juan de Dios. Hoy yendo el señor Bobi por la calle, salió uno hablándole y saludándole, mientras le agarro el freno al caballo (porque iba a caballo) y salieron de una bocacalle tres hombres con puñales, y habiendo tirado varias puñaladas, le quitaron el caballo. Las puñaladas casi todas las recibió en el sombrero tan solo uno que otro rasguño en las manos. Esto sucedió en la calle cerca de la casa del Cobre.

M. 31. Salió la procesión de San Sebastián, la cual no pasó por la calle de la estación, tan solamente por fuera de cortadura. En la noche hubo tinieblas en Catedral y Convento de San Francisco.

Abril

J.1. Hoy hubo los oficios en todas las iglesias como es costumbre por la festividad de Jueves Santo. En la noche, salió a rezar las estaciones el cabildo eclesiástico, como siempre. En catedral hubo consagración de óleos en Catedral. También el Ayuntamiento salió a rezar.

V.2. Hoy oficios. Por la mañana salió a rezar el Ayuntamiento las estaciones como es costumbre.

S. 3. (De Gloria) Hoy cerca de las 11 hubo un repique por haberse celebrado la ceremonia de la iglesia que anualmente se hace. Poco después hubo un repique el cual fue por haber capitulado en Guadalajara el señor Parrodi.

D.4. Hoy hubo un repique general por el pronunciamiento de Aguascalientes.

M. 6. Hoy amanecieron soldados en los fortines los cuales fueron quitados cerca de las siete de la mañana, más como cerca de la una de la tarde quitaron las vigas de los fortines y volvie

%p70–Vildosola–2025–10–15%

ron a poner soldados en los fortines por decirse que las fuerzas de Degollado están en los Ranchos. Salió la caballería a atacarlos, más como entonces tomaron el camino de la Pila y se fortificaron en la casa grande, se volvió la caballería. En la noche pusieron en los fortines las piezas de artillería, y muy temprano empezaron a dar el quien vive, y a correr la voz los centinelas. En este día muchas personas que vivían fuera, de cortadura, se metieron para adentro.

Mes.7. Hoy siguen puestos en los fortines los soldados y las piezas. Hoy salió fuera el señor don José María Aranda. Hoy en la noche murió la madre de la señora María Josefa.

J.8. Hoy fueron a catear la casa de don Severo Lechón para ver si tenía armas, también fueron a catear la casa de don Mariano Aguilar con el mismo objeto, habiendo sacado de dicha casa un caballo después le devolvieron. Hoy se sabe que el padre Morales está libre, habiendo vuelto a su curato.

V.9. Hoy en la noche fueron a catear el curato de San Sebastián, habiendo maltratado al padre del P. Saldaña y habiéndose traído presos a los hijos

%p71–Vildosola–2025–10–15%

de don Francisco Estrada, y uno de don Brígido Castillo, los cuales luego que los conocieron los dieron libres. Hoy en la tarde fueron a sacar cosa de 50 rifles de la casa del señor Davies, para armar al nuevo Batallón de Iturbide cuyo batallón se compone de señores particulares.

S.10. Hoy le dieron la orden de destierro al padre Saldaña, habiéndole dado el término de 12 horas para salir de Estado. Hoy dicen que jugando se ahorcó el hijo de un sastre.

D.11. Hoy en la noche hubo retreta. En la misma noche cerca de las 11 hubo su alarma, por saberse que el enemigo estaba en Santiago. También dicen apresaron al oficial que cuidaba el fortín del costado de San Juan de Dios, por decirse que dicho oficial había vendido el fortín, lo cual dicen es

%p72–Vildosola–2025–10–15%

cierto porque un muchacho se subió a la torre, y empezó como a llamar a los que estaban en Santiago. Hoy cerca de las 12 del día, salió fuera de San Luis del presbítero don Mariano Saldaña. Hoy en la noche se sacramentó el señor Boeta.

L. 12. Hoy en la noche un oficial que tenía antes don Pascual García, fue a decirle que las tropas del señor Vidaurri estaban ya en Santiago, que el mismo los había visto; luego que el señor García, tuvo esta noticia, se la fue a comunicar al señor Alfaro, el cual, mando ver al que le había dicho noticia al señor García, y habiéndole preguntado si era cierto, le dijo que sí. Al momento mando avisar el señor Alfaro, que ensillara el 3° de Caballería, y habiéndole preguntado el señor Alfaro, otra vez al sujeto si era cierto, le contestó que sí, y le dijo el señor Alfaro, que, de ser mentira, lo castigaría; habiendo llegado a Santiago, no encontraron a nadie, preguntaron, y dijeron que no había allí llegado gente de fuera. Cuando volvieron mandaron presentar al soldado el que dio la noticia.

V.16. Hoy mandaron por el padre Saldaña.

S. 17. Hoy cerca de las 10 de la mañana llegó el padre Saldaña. En este mismo día cerca de las dos de la tarde empezaron a componer las calles y salió la caballería, varios particulares y carretelas, a recibir al señor Miramón; poco después empezaron a volverse los que habían ido a recibirlo, y la razón fue que como en el camino encontraron a un extraordinario, el cual venía a decir que, al venir la tropa del señor Miramón, pasando por el puerto de Carretas, fue asaltada por los de Nuevo León, los cuales estaban en la altura, más sin embargo al momento se empezó el fuego, hasta que se fueron para Bocas (según dicen). Cerca de las seis de la tarde, ya se sabía que había triunfado el padre Miramón, y que muy pronto entraría, en efecto cerca de las siete y media de la noche, entró la tropa la cual era algún número viniendo de caballería, infantería y artillería, también traen muy buenas piezas y algunas de grueso calibre, hubo repiques bastantes cohetes, ahora y antes que fue la entrada del señor Miramón, cuyo señor está posado en la casa del señor don Gregorio Sánchez. Se adornaron las calles y hubo serenatas.

%p73–Vildosola–2025–10–15%

D.18. Hoy en la tarde se adornaron las calles, para que saliera la tropa, para que la viera el señor Miramón, habiendo quitado los soldados que estaban en los fortines, los cuales los volvieron a poner, tan luego como entro la tropa a sus cuarteles. En la noche hubo serenatas en la casa del señor Alfaro y en la casa del señor Miramón.

L. 19. Hoy hubo jubileo en el Sagrario. Hoy en la tarde, se mudaron los soldados del 3° de infantería, al Convento de San Agustín.

M. 20. Hoy hubo una misa rezada en el Convento de San Francisco, cuya misa la repicaron con la campaña del reloj la cual fue del capítulo, por haberse abierto la visita del capítulo. Hoy murió Miguel Sámano, hijo del señor don Pedro Sámano. Hoy se pasaron los soldados del 2° al Convento de San Francisco.

Mes.21. Hoy ha sido nombrado Gobernador del Estado el señor don Juan Othón. Hoy en la noche murió en Santa María del Río la Señora Manrique.

J.22. Hoy se fue don Severo Lechón para México. En este mismo día, llego su carga. Hoy quitaron los soldados de los fortines.

S.24. Hoy salió fuerza para Gallinas, a donde van a atacar a los de Nuevo León en donde dicen que están. Jubileo en la Merced, y en la tarde salves San Agustín y el Carmen.

D.25. Hoy salió la letanía de los santos de Catedral habiendo ido al Convento de San Francisco también hubo letanía, en San Agustín y la Merced. En la tarde hubo función de toros dedicada a el señor Miramón, habiendo ido a partir la plaza la tropa del 3° de infantería. En la noche, hubo retretas. Hoy llego el P.F.J. M. Marín.

L. 26. Hoy empezó a haber catedra en el Seminario. Hoy le dieron al señor don Francisco Estrada, el nombramiento de contador de la Casa de Moneda para cuando este en corriente dicha oficina; también le dieron la vacuna.

M. 27. Hoy llego Paz y su familia de la hacienda de Carranco. Hoy murió la hermana de doña Petra Sánchez.

Mes. 28. Hoy se casó don Manuel Carbon, con doña Justa Esparza, el casamiento fue en San Juan de Dios y los caso el P.F.J. María Marín. En el momento del casamiento se presentó el señor don Francisco Torres, diciendo que tenía impedimento la señora, pero el Padre sabiendo todo, le dijo que lo arreglara con el señor cura, pero cuando volvió, ya habían acabado de administrar el sacramento. Hoy en la tarde

%p74–Vildosola–2025–10–15%

se mudó doña Jesús Lemus de la casa de Paz a la del señor Othón. En esta misma tarde llego del Real de Catorce, don Encarnación Rodríguez sobrino de Señora María Josefa.

J.29. Hoy hubo bendición de pullas en el Convento de San Francisco, también hubo sermón, en honor de San Pedro de Verona, el cual lo dijo, el R.P.F. Antonio Mata. Hoy pusieron preso en la cárcel, al señor don José María Aguirre, porque, habiéndole ido a entregar unas cartas, un oficial, dicho señor Aguirre se empezó a incomodar, y le dio una bofetada, viendo esto el oficial, le pegó de bofetadas y se lo fue a avisar al señor Miramón, el cual lo mando poner en la cárcel.

V.30. Hoy se fue señor Encarnación, primo de señora María Josefa. Hoy se dice que los de Nuevo León tomaron a Zacatecas. Hoy en la noche presaron a Paz, el cual lo pusieron en la cárcel. Anoche se tomó el dicho de casamiento el licenciado don José María Esparza y Pereda. Hoy tomó posesión de la canonjía el señor cura licenciado don Manuel del Conde.

Mayo

S.1. Hoy hubo jubileo en el Sagrario, y en la tarde salves en el convento de San Agustín, San Francisco, Convento del Carmen y la Merced. En San Francisco fue por la mañana después de la misa. Hoy hubo revista con música.

D.2. Hoy en la noche hubo retreta con música en la plaza. Jubileo en el Convento de San Agustín. Hoy en la tarde hubo seis balazos en la villa de Santiago, el motivo fue que, habiendo ido una comisión a dicha villa para buscar a los desertores, se alarmaron los de la villa, habiendo habido sus muertos. Hoy hubo revista con música. Hoy fusilaron en la hacienda de Peotillos a don Antonio Araujo y al señor Zepeda. Hoy presaron a don Diego Montante.

M.4. Jubileo en el Sagrario. Hoy se fue para la casa de las señoras Falgar, doña Cesárea Esparza hija del licenciado se fue para dicha casa porque de allí la han de llevar a México adonde se va a meter a un convento.

Mes.5. Hoy se casó el licenciado don José María Esparza Pereda.

J.6. Hoy salió para México el señor don Anastasio Parrodi. Hoy por empeños de varios señores y en particular del ilustrísimo señor Obispo del señor cura y de don Nicanor Lobo, pudieron conseguir con el señor Miramón el que sacaran de la prisión en que estaba el señor Paz, con la condición de que mañana saliera para México. Hoy concluyó un triduo que se le estaba haciendo en el Convento de San Francisco al señor de las injurias.

%p75–Vildosola–2025–10–15%

V.7. Hoy salió Paz para México. Hoy dicen que mudaron al señor Montante a la capilla de la cárcel, habiéndolo sacado de un calabozo donde estaba.

S.8. Hoy hubo jubileo en San Francisco, Sagrario, y villa de Tequisquiapan. En la tarde, hubo salve en San Agustín, el Carmen, la Merced, y en el santuario.

D.2. Hoy hubo misa de tropa en los conventos donde hay soldados. Hoy en la noche, hubo retreta con música.

L.10. Hoy salió la Letanía de los Santos que anualmente sale de Catedral a San Agustín; habiendo habido también en las Iglesias de San Francisco, La Merced y San Agustín.

M.11. Hoy salió la Letanía de Catedral y fue al Convento del Carmen. También hubo letanías, en las mismas Iglesias que ayer.

Mes.12. Hoy hubo jubileo en el Santuario. Hoy se concluyó en la Tercera Orden de San Francisco del novenario que se estaba haciendo al Señor de las Injurias; habiendo habido en la tarde, rosario como todas las tardes ha habido, y después Miserere, habiendo tocado en piano. Hoy tumbaron la mitad del fortín de la esquina de Portillo para que entre el día de mañana María Santísima de Guadalupe.

J.13. Hoy por ser día de la Ascensión del Señor hubo hora en Catedral y en el Carmen. Hoy en la tarde bajo María Santísima de Guadalupe de su Santuario a Catedral, habiendo marchado los dos cuerpos, el segundo y los Carabineros; también marchó todos los oficiales el señor Miramón, las autoridades y algunos empleados, habiendo venido para salir en la procesión, los santos de las villas como siempre vienen. Hoy en la noche se dice que las fuerzas de Nuevo León están en la Parada por lo que han sacado piezas de artillería y han empezado a componer el fortín de la Concepción.

V.14. Hoy siguen los soldados en los fortines y están puestas las piezas de artillería en todos los fortines. Hoy se concluyó el fortín de la esquina de Portillo. Hoy dicen un dado orden de presar a casi todos liberales, habiendo presado que desterrado a algunos, Hoy varias familias han entrado para dentro de fortín. Hoy llegó el padre don Modesto Mena.

%p76–Vildosola–2025–10–15%

S.15. Hoy siguen los soldados, y las piezas de artillería en los fortines habiendo además también soldados, en varias alturas como son: el Seminario y la casa de don Ignacio Duque. En la tarde hubo salves en San Agustín, el Carmen y la Merced. En la noche hubo benedicta en Catedral. Jubileo en el Colegio de San Nicolás.

D.16. Hoy hubo jubileo en el Convento del Carmen. Por la tarde, salió la procesión de María Santísima de Guadalupe; habiendo salido también en procesión, los Santos patronos de las villas; y habiendo ido a alumbrar a María Santísima muchas señoras decentes; en dicha procesión salió el ilustrísimo señor Obispo y el ilustrísimo Ayuntamiento también marchó un piquete de soldados de los Carabineros. En la mañana de hoy se le dijo en Catedral, una misa a María Santísima de Guadalupe, en acción de gracias habiendo asistido a la misa el ilustrísimo Ayuntamiento y el señor Gobernador. Hoy siguen todavía los soldados y las piezas, en sus mismos sitios.

L.17. Hoy se mudó Severiana de la casa en que vivía, a otra que está a la vuelta de la casa de la señora Rivas. Hoy en la noche estuvieron tocando música en el fortín del Arenal, hasta cerca de las ocho y media. Hoy empezó Francisco a dar lección a Alfaro.

M.18. Hoy en la mañana estuvieron tocando música en el fortín de la Concepción. Hoy al medio día, estuvieron llevando a algunos cargadores para Palacio, Según se dice fue, porque uno había hecho un robo, pero como después precio, ya no fue necesario tomarles declaración y luego los dieron libres.

Mes.19. Hoy hubo jubileo en el Sagrario. Hoy dicen han presado a Belaumeran y a un extranjero según dicen por adjudicación de casas. Hoy está casi concluido el fortín que han hecho nuevo adelante del Cuartel de la Artillería. En este día siguen todavía las piezas y los soldados en sus alturas y fortines.

J.20. Hoy cerca de la oración se mandaron retirar las piezas y los soldados de todos los fortines, y salieron fuera; no se sabe para qué punto, ni con que objeto, lo que dicen, es que están los de Nuevo León fortificados en el Puerto de San Bartolo, y que las fuerzas de aquí, van a atacarlos. Hoy llegó el R.P. Prior del Convento del Carmen el P.F. Francisco María de San Rafael.

%p77–Vildosola–2025–10–15%

V.21. Hoy se sacramentó la señora doña Camila Parada.

S.22. Hoy a la madrugada murió la señora doña Camila Parada. Hoy en las misas mayores de todos los Conventos, se leyeron las profecías, hubo letanía de los Santos, y cuando se cantó la Gloria se tocaron las campanas, esto fue por ser sábado de gloria de la Cuaresma chiquita. En la tarde hubo salves en la Merced, el Carmen y San Agustín. Hoy en la noche fue pasado el cadáver de la señora Parada de su casa a la Capilla de los Remedios, donde se va a depositar, habiendo concurrido a dicha traslación varias personas.

D.23. Hoy en la mañana fue trasladado el cuerpo de la señora doña Camila Navedo de Parada, de la Capilla de los Remedios donde estaba depositado, al Sagrario donde se le hicieron los funerales; cuyos funerales debían de haber sido en el Convento del Carmen, pero como el R.P. Prior no permitió que allí se hicieran por no permitirlo hacerse hoy funerales por la rúbrica; por cuya razón fue, por lo que se hicieron en el sagrario, habiendo acompañado al cuerpo la comunidad de N.S.P.S. Francisco y varios señores particulares, después de los funerales, fue pasado el cadáver, a la Santísima Iglesia Catedral, donde se sepultó. Hoy en la tarde hubo función de toros, habiendo partido la plaza el primer ligero de San Luis. Al medio día hubo un repique general por haberse tenido noticia de que el señor Mejía había tomado el puerto de Tampico, habiendo derrotado al señor Garza, el cual se fugó, pero según dice el parte, lo derrotó completamente, habiéndole quitado 12 piezas de artillería, de campaña y sitio: 16 carros de pertrechos de guerra y parque, gran número de armamento, y cosa de 115 prisioneros.

L.24. Hoy hubo jubileo en el Convento de la Merced. Hoy al medio día salieron cosa de 200 hombres de caballería e Infantería, a encontrar al señor Osollo. En la noche pusieron las piezas de artillería en los fortines.

M.25. Hoy siguen todavía los soldados y las piezas en sus respectivos fortines. Ayer mudaron al señor Aguirre que estaba preso en San Francisco, lo mudaron para la cárcel.

Mes.26. Hoy por orden del señor prefecto se mandaron presar a varios

%p78–Vildosola–2025–10–15%

entre ellos a don Florencio Cabrera, a don José María Morillo y otros varios, únicamente por no haberse inscrito en el Batallón que se va a levantar. Siguen todavía los soldados en las alturas y fortines, y también las piezas puestas en algunos fortines. En la noche se dio orden de quitar las vigas de los fortines a la oración.

J.27. Hoy al medio día dicen hubo un alboroto cerca de San Juanico, por decirse que venían los Federales, y q estaban ya en dicha villa, pero no hubo nada de esto, lo que únicamente hubo fue que, habiendo habido un alboroto en la villa, y queriéndolos apaciguar el alcalde, no lo respetaron, sino que, todo lo contrario, hicieron; porque lo maltrataron y lo hirieron; habiendo gritado algunos viva la federación. Hoy se andan empadronando todos los vecinos para ver todos lo que no se han inscrito. Hoy siguen todavía los soldados, y las piezas en sus respectivos puntos. Los presos que se pusieron ayer, no es cierto; únicamente el señor Morillo.

V.28. Hoy se están haciendo varios preparativos para el recibimiento del señor Osollo, que dicen se reunió ya con el señor Miramón, y ya se han nombrado las señoras que han de coronar a los señores Osollo y Miramón. Hoy siguen los soldados y piezas en sus respectivos lugares.

S.29. Hoy al medio día entraron algunos cuerpos de caballería. En la noche se empezó a tumbar el fortín de la Concepción para la entrada del señor Osollo. Se siguen haciendo preparativos para su recibimiento. En la misma tarde hubo salvas en la Merced, San Agustín y el Carmen. Hoy en la noche llegaron los señores don Luis G. Osollo y don Miguel Miramón. En la misma noche se acabó de tumbar el fortín de la Concepción, y se mandaron quitar los soldados, y las piezas de las demás fortificaciones y alturas.

D.30. Hoy desde muy temprano se empezaron a componer las calles para el recibimiento de las tropas de San Osollo, y en particular la calle de la Concepción que es por donde deben parar, en dicha calle, había tres arcos triunfales, todos de lienzo y armazón de palo, el primero, estaba en la panadería del retiro, con unas águilas arriba, y a los lados dos jarrones, y en medio del arco letrero; el segundo estaba de un

%p79–Vildosola–2025–10–15%

balcón de la casa de don Paulo Verástegui, a la casa del frente el cual tenía al lado derecho la fe y al otro lado un guerrero, y arriba en medio del arco, un letrero que decía "Inmortalidad a los señores jefes y oficiales del ejército restaurador" y el tercero estaba en la esquina de la plaza el que tenía arriba un jarrón de cada lado, y en medio un letrero que decía "Honor a los valientes Osollo y Miramón". La plaza estaba bastante adornada y en palacio, había un letrero en el balcón con letras de palo y vasos de colores para encenderlos en la noche. El letrero ocupaba todo el frente de Palacio y decía así: "Vivan los Excelentísimos Señores Generales don Luis G. Osollo y don Miguel Miramón". Además de todas estas composturas había algunas casas más bien compuestas porque además de las cortinas que todas las calles y casas tenían; pusieron en la casa del señor don Joaquín López Hermosa, una cruz roja con ráfaga dorada y con un letrero que decía (arriba de la cruz) "Con este signo" (debajo de la cruz) "vencerás." En la casa del señor Portillo había espejos en la calle y en la del señor Vega un listón verde en una ventana con letras doradas; "Viva el señor Osollo" algunas otras casas tenían canastillas y otras colgages en las canales; rosas, cruces, adornos y flores de campo, en los balcones; y cortinas. Todas las calles de San Sebastián estaban también muy bien compuestas. En la garita de México había música. En el Portillo a mano derecha de la Merced, había vela para que ahí vayan las señoras que han de ir a coronar. Cerca de las nueve de la mañana entró la tropa la cual se formó en la plazuela de Merced mientras se les ponían a los oficiales los listones que se les tenían prevenidos, a esta misma hora llegaron las señoras que habían de disponer los listones, las que llegaron en carretelas abiertas y del modo siguiente: tres señoras y un hombre en cada carretela; las señoras que pusieron los listones son: la señora doña Susana Gutiérrez Castillo de Urtegui, la señora doña Antonia Soberón de Gutiérrez Castillo, la señora doña Guadalupe Adame, la señora doña Francisca Othón, la señora Basarte, hermana de la

%p80–Vildosola–2025–10–15%

esposa del señor Juan Othón, la señora doña Isabel Cañizo, la señora doña Juana Gutiérrez Castillo, la señora doña Refugio Sánchez, la señora doña Eduvige Portillo y una de las señoras Otahegui. Estas señoras son las que estuvieron poniendo los listones a los oficiales los cuales decían "Vivan los defensores de la religión y del orden y vencedores en Carretas" y otros "Vivan los defensores de la Religión y del orden". Los primeros era el listón blanco y abajo una rosa de listones verde, blanco, y encarnado, y en cada un letrero. En el verde, "Vivan los vencedores en carretas", en el colorado "Viva la Religión y el orden” y en el blanco, "Honor a los valientes defensores de la Religión y del orden", estos fueron los que, si les pusieron a los oficiales que se hallaron en Carretas, y a los de México, les pusieron de los segundos, que eran listón encarnado, y al último la flor como los anteriores; con la diferencia de que en el verde no decían "vivan los vencedores de Carretas" sino otro letrero. También a los soldados les repartieron una flor de listón verde, encarnado y blanco, y un listón colgando que decía. "Viva la religión y el orden", pero los listones de la flor no decían nada y estos no iban puestos en el cuello como los de los oficiales, sino prendidos con un alfiler en el brazo. A los soldados se les repartió un oficial para que se los pusieran. A los señores jefes les pusieron todo el listón de tres colores, siempre con los mismos letreros. Luego que acabaron de poner las señoras los listones a los oficiales, montaron en carretelas tres señoras con un hombre; de los hombres eran don Octaviano Cabrera, don Francisco Camacho, y don Gregorio Sánchez los que después de montar en la carretela, se fueron para la sala de gobierno de Palacio en donde coronaron al señor Osollo y al señor Miramón, y les pusieron unos medallones de oro (las coronas fueron de razo verde muy bien adornado) después; dio un discurso la señora Basabe al que contesto en pocas palabras el señor Osollo. A poco rato que las señoras se fueron para Palacio empezó a entrar la tropa por la calle de la concepción repicando en todas las

%p81–Vildosola–2025–10–15%

Iglesias cuyo repique empezó desde que empezaba a entrar la tropa a San Sebastián, hubo bastantes cohetes, regaron en algunas partes con flores y agua de colonia tiraron obleas y Cuartetos y Sonetos, dedicados al señor Osollo y Miramón. Cerca de las 12 del día que fue cuando acabo de entrar toda la fuerza, la empezaron a dividir para distintos cuarteles y Conventos. En la noche, se iluminaron todas las calles y en particular Palacio; habiendo habido serenata con música.

L.31. Hoy se han adornado las calles con cortinas en las ventanas habiendo dejado puestos los arcos triunfales. En la noche hubo muy poca iluminación a consecuencia de estar lloviendo, por cuyo motivo no hubo serenata en la Plaza como debía haber.

Junio

M.1. Hoy jubileo en el Sagrario. Hoy hace días pusieron presa a la señora Arredondo en las Recogidas. Hoy salió libre el señor don José María Morillo. Hoy casi en ninguna parte compusieron ni pusieron cortinas, ni tampoco en la noche se iluminó, ni hubo serenata como debía haber según el bando; a consecuencia de las lluvias. La calle de la concepción es la única que ha estado un poco más compuesta y con los arcos triunfales.

Mes.2. Hoy se empezó a poner la vela para el Corpus que debe salir mañana. Hoy hubo revista en San Agustín y demás Cuarteles de comisaria.

J.3. Hoy hubo revista en el Carmen y cuarteles que faltaron ayer. Hoy por ser Jueves de Corpus, salió el Corpus de la Catedral después de la misa, la que dijo el señor arcediano don Juan Gutiérrez, cuyo señor fue el que sacó al divinísimo, habiendo asistido todas las autoridades y comunidades; detrás del Corpus, marchó mucha tropa de caballería, infantería y artillería, habiendo habido valla en toda la estación, la cual al ir pasando el Corpus, se iba uniendo. Al pasar por cerca del Obispado pusieron un tapete en el cual tendieron la bandera, y entonces el Padre hecho la bendición con la Custodia sobre la bandera y después la levantaron. Luego que entro el Corpus colocaron a su Majestad en el trono quedando expuesto todo el día. Luego se fueron las autoridades, y los señores Osollo y Miramón se fueron

%p82–Vildosola–2025–10–15%

al balcón de la Lonja por donde paso después toda la tropa. En la tarde hubo función de toros dedicada al señor general don Luis G. de Osollo, cuya función se acabó pronto por el aguacero que cayó. Hoy hubo jubileo en San Agustín y el Carmen.

V.4. Hoy hubo jubileo en el Sagrario. Hoy por haber metido unos caballos del señor general Pérez Gómez en la caballería en que tenía sus caballos el señor Caloca, este se incomodó y mandó que los sacaran más viendo que no se le obedecía, mandó una carta algo grosera al señor general, el cual no sabía porque motivo le mandaba tal carta, pregunto quién era el señor Caloca y le mando un recado, volvió a escribirle otra carta más pesada, entonces el señor general lo mandó llamar a la casa del señor Alonso pero él no quiso ir sino que se puso a escribir otra carta más pesada entonces el señor general, mandó desafiar al señor Caloca y no se sabe en que habrá quedado dicho desafío. Hoy llegó de Santa María el señor don Paula Verástegui. Hoy hace algunos días se publicó la Ley de Capitales en que se exige el 1%. Hoy acabaron de descomponer la Calle de la Concepción. En la noche hubo baile en la Lonja. Hoy hubo jubileo en Catedral por el octavario del Corpus.

S.5. Hoy al medio día empezaron a formar la tropa para la revista que en Santuario debió pasar el señor Osollo y Miramón, cuya revista se acabó cosa de las tres de la tarde, a cuya, hora se volvieron del Santuario. Hoy llego de México el señor don Mariano Cataño.

D.6. Hoy por ser domingo de sacramento hubo función en el Convento de San Francisco. La misa la dijo el M.R.P. Provincial F. Manuel González y el sermón lo dijo el R.P.F. Antonio Mata. En dicha Iglesia quedo expuesto todo el día el Divinísimo. En la tarde hubo corpus habiendo salido de dicha Iglesia. Hoy en la mañana robaron la casa del señor Alfaro. En la tarde al ir el señor don Rodrigo Duque para su huerta, le salieron dos leperos de los cuales uno le tiro un cintarazo, el cual le dio en las manos y en el pescuezo, más al tiempo de quitarse el cintarazo, el otro le dio un balazo habiendo caído muerto del caballo; y entonces los leperos se montaron en el caballo y se fueron.

%p83–Vildosola–2025–10–15%

L.7. Hoy a las siete de la mañana murió el señor don Eusebio Salazar habiéndose enterrado en la capilla de los Remedios cerca de las 9 de la misma mañana. Anoche hubo un gran baile en la Lonja dado al señor Osollo dicho baile estuvo muy concurrido y la sala y Patio de la Lonja estuvieron bastante adornados. En el baile coronó el señor Miramón a las ninfas que lo coronaron y a más de cuyas a otras, habiéndoles regalado un ramillete de flores a cada una. En la tarde de hoy se ha enfermado de fiebre en el Cerebro el señor Osollo. Hoy se fue para México el general Pavón.

M.8. Hoy Jubileo en el Sagrario San Francisco y Villa de Tequisquiapan. Hoy cosa de las cinco de la mañana empezó a salir la tropa para el Puerto de Carretas, donde dicen están fortificados los de Nuevo León. Más como el señor Osollo ha seguido enfermo, se mandó contra orden para que se volviera la tropa; la cual se volvió cosa de la ocho y media. En la tarde salió la tropa a ejercicio en el Santuario. Hoy a las dos de la tarde, salió para México el señor don José María Aguirre, el cual salió libre ayer, con la condición de marcharse hoy.

M.9. Hoy a la mañana y en la tarde, hubo ejercicio en el Santuario habiendo ido varios cuerpos.

J.10. Hoy por ser la octava de Corpus hubo sermón en Catedral habiendo salido luego que se acabó la misa el Corpus, y dio vuelta en toda la plaza. En la tarde hubo Corpus en San Sebastián. En el Santuario hubo ejercicio por la mañana y en la tarde. Hoy se dice que Degollado está atacando a Guadalajara para lo que Vidaurri mando un auxilio.

V.11. Hoy hubo jubileo en el Convento del Carmen el cual no fue más que en la tarde. Hoy salieron cosa de 600 hombres de caballería para Rioverde, donde dicen esta Zayas. En la tarde hubo ejercicio en el Santuario. Hoy se empezó un préstamo de $60,000 por decirse que mañana marcha la tropa. Hoy en la tarde se pusieron presas a varias personas por reusar el entregar la cantidad de dinero, que les pertenecía por el préstamo; cuyas personas, salieron casi al momento por haber luego dado orden de entregar el dinero.

L.12. Hoy muy temprano salió la tropa al mando de los generaleres Miramón, Pérez Gómez, y Liceaga, habiendo dejado aquí una poca de fuerza para que marche con el señor Osollo, tan luego como se alivie. En este mismo día se pasaron los flanqueadores que estaban en el Hospicio

%p84–Vildosola–2025–10–15%

al Convento de San Agustín. Hoy se reparten avisos de un "Gran Panorama" que está en la casa del Hotel Iturbide.

M.15. Hoy jubileo en el Colegio de San Nicolás. Hoy cerca de las siete de la mañana salió de la Capilla del Loreto para la soledad de los Ranchos el Señor del Refugio. Hoy tomó posición el nuevo Ayuntamiento el cual se compone de los señores siguientes: Doctor don Tomás O. de Parada, alcalde primero, don Rafael Aguirre, don Silvestre Portillo, don Francisco Bermúdez, don Octaviano Cabrera, don José Tornel, don Pascual García y otros varios que fueron los que hoy tomaron posesión.

Mes.16. Hoy jubileo en el Convento del Carmen.

J.17. Hoy se ha recibido la noticia de que las fuerzas que salieron de aquí al mando del señor coronel Chacón para el Valle han derrotado a las fuerzas de Zayas que estaban en dicho punto, habiéndoles agarrado algunos prisioneros y quitado una pieza de artillería y noventa fusiles y rifles, sus cajas de parque, y una de guerra.

V.18. Hoy cerca de las cinco de la mañana se sacramentó el señor general don Luis G. de Osollo habiendo llevado al Divinísimo el presbítero don Mariano Saldaña. La administración fue muy de prisa tanto que muy poca gente fue alumbrando; y se dispuso el que fuera a esa hora por estar muy grata. Hoy hubo jubileo en el Convento de la merced. En la tarde cosa de las cuatro y mecha tiraron dos cañonazos los cuales fueron por haber muerto el señor general en jefe don Luis G. de Osollo, a poco rato empezaron a doblar en todas las Iglesias y en San Francisco doblaron con la campana del reloj. Siguen tirando un cañonazo cada media hora y a las ocho volvieron a doblar en todas las Iglesias.

S.19. Hoy cosa de las nueve y diez minutos se sintió en esta Capital un pequeño temblor. Hoy desde las seis de la mañana hasta las ocho de la noche tiraron un cañonazo cada media hora. En la tarde se cerraron las tiendas y en varias partes pusieron cortinas con gasas negras. En la noche se pasó el cuerpo del señor Osollo de su casa a Palacio habiendo ido el Ayuntamiento y varias personas particulares a acompañar el cadáver. El cual ya inyectado con una comparación nueva. La inyección la hizo el doctor don Tomás O. de Parada; también se le mando hacer un cajón de encino forrado por dentro de zinc y por fuera de pana negra con galón. El forro de zinc se hizo

%p85–Vildosola–2025–10–15%

para que si acaso mandar pedir el cadáver de México pueda ir sin que menos se corrompa. A la hora de mudar el cadáver doblaron en todas las iglesias.

D.20. Hoy siguen lo mismo que ayer tirando cañonazos por la muerte del señor Osollo, cada media hora desde las seis de la mañana hasta las ocho de la noche y doblando en todas las iglesias a las 12 y a las ocho. Hoy según dicen se anda convidando para las honras del señor Osollo. Los Señores nombrados para el Ayuntamiento que tomó posesión el día 15 del presente son los siguientes: alcaldes. 1° Don Tomás O. de Parada. 2° Don Herculano Manrique de Lara. 3° Don José María Fernández Rincón. 4° Don Gregorio Sánchez; regidores. 1° Don Joaquín López Hermosa. 2° Don José María Tornel. 3° Don Octaviano Cabrera. 4° Don Rafael Aguirre. 5° Don Felipe Monjarás. 6° Don Ignacio Escalante. 7° Irineo López. 8° Anastasio Parra. 9° Don Refugio Gallardo. 10° Don José María Coca. 11° Don Pascual García. 12° Don Silvestre Portillo; procuradores. 1° Licenciado don Rafael E. Sousa. 2° Don Francisco F. Bermúdez.

Hoy hace algunos días han suspendido de su empleo al señor don José María González Mier. Ayer llegó de su rancho don Julio Galnarez y José María.

L.21. Hoy llegaron las tropas que fueron al Valle del maíz habiendo traído cosa de cuarenta y tantos presos. Hoy a las nueve de la mañana sacaron el cadáver del señor Osollo de Palacio a Catedral habiendo rodeado la calle de la cruz y la concepción; fueron por el cadáver todas las comunidades, las autoridades y casi todos los señores particulares, marchó bastante tropa; todas las tiendas estaban, cerradas y en muchas partes cortinas con luto. Mientras se pasó el cuerpo de Palacio a Catedral hubo dobles en todas las iglesias luego que llegó a Catedral se le hicieron las honras las que se acabaron cerca de la una de la tarde. Después trasladaron el cuerpo de la Compañía a el Convento de San Francisco donde fue sepultado. Luego que se sepultó terminaron de doblar y tiraron algunos cañonazos, y la tropa se volvió para sus cuarteles con los tambores y las cornetas muy destempladas. Hoy apresaron a don José R Luján.

M.22. Hoy en la tarde llegaron del Valle de San Francisco, mi tío don Francisco con su familia y madre Jesús.

Mes.23. Hoy se fueron para el rancho don Julio Galnarez con su hijo. Hoy

%p86–Vildosola–2025–10–15%

en la tarde hubo vísperas y en la noche maitines en el Sagrario por la función de la Vela Continua. También en esta misma tarde convidaron para el Corpus de la misma Vela; convidando para dicho acto piadoso, la hermana mayor doña Josefa B. de Conde y la Señora Tesorera, doña Juana Pereira. Hoy salió libre el señor Luján.

J.24. Hoy hubo jubileo en el Convento de la Merced. Hoy en la mañana hubo función en el Sagrario cuya función fue de la Vela Continua. La misa, la dijo el señor conde y el sermón el M.R.P. Provincial del Convento de señor Francisco, de P.F. Manuel González. Después de la función quedo expuesto el Divinísimo para sacarlo en la tarde en procesión; la cual salió cosa de las cinco y media, habiendo ido con el Guión y el Palio varios señores y particulares.

V.25. Hoy en la mañana empezaron a componer el fortín de la Concepción por decirse que las fuerzas que estaban en Zacatecas venían para esta capital; por los que varias familias se alarmaron y algunas si han empezado a salir fuera.

S.26. Hoy se fue la familia de mi tío don Francisco Glevinan, la familia de don Buenaventura Carrillo y mi madre Jesús para el Valle de San Francisco. También hoy se fue para México el señor don Silvestre Portillo y sus dos hijos. Hoy acabaron de levantar el fortín de la Concepción. En la noche, pusieron soldados a todos los fortines y alturas, también pusieron piezas en algunos de los fortines. Hoy dejó el Gobierno el señor don Juan Othón, también en esta día se declara la ciudad en estado de sitio.

D.27. Hoy siguen los soldados y las prisas puestas en sus respectivos puntos. Hoy por la multitud de borregos que se han contado se han alarmado muchas familias; habiendo entrado muchas para dentro de fortín, y otras habiéndose salido fuera, de las que fueron, don Ramón Adame, don Rafael Aguirre, don Tomás Revilla, don Paulo Verástegui y otras varias, cuya salida la emprendieron cosa de las dos de la tarde, por creer que la entrada de los de Nuevo León fuera hoy mismo. Además de estas familias que se salieron, hoy, habían ya dispuesto su viaje para mañana otras, las que se aquieron luego que vieron que

%p87–Vildosola–2025–10–15%

casi todo lo que se había contado eran mentiras puesto que el “Boletín oficial" y periódico del Gobierno de esta Capital decía que por una carta particular que se había recibido de Zacatecas; decían que las fuerzas que dicho punto estaban se habían dirigido para esta Capital, lo cual no es cierto, porque habiendo mandado el señor comandante general don Francisco Sánchez exploradores para ver si en efecto venían, estos dijeron que no era cierto pues que ni aun de Zacatecas se habían movido. Se dice que los soldados y las piezas de artillería que se pusieron anoche, fue por haber avisado por Tequisquiapan un grupo de gente, el cual cuando fue la caballería ya se había separado.

L.28. Hoy siguen los soldados y las piezas en sus respectivos puntos.

M.29. Hoy cosa de las siete de la mañana se empezaron a alarmar muchas familias por saber que los de Nuevo León estaban en Santiago y Tlaxcala, a las nueve de la mañana entró a parlamentar el licenciado Villanueva habiéndoles contestado que no se rendirán por ningún motivo. A poco salió la caballería al mando del señor Adame para atacarlos en Santiago más luego que llego la caballería tiraron un cañonazo del cual salió herido el señor Adame y han que tiraron el cañonazo corrieron, más la caballería se volvió por ser poca. Hoy en el día siguen tirando de Santiago para acá no tirando, de adentro masque cuando divisaban algo. En la tarde tiraron algo más lo que fue porque quisieron tomar la Alhóndiga más no los dejaron. En la noche hubo algunos tiros. Hoy se vino Severiana.

Mes.30. Hoy siguen tiroteándose unos y otros; cosa de las 12 del día se cargó algo más el fuego, cuyo tiroteo dio por resultado el haberles quitado una pieza de Aartillería a los de Nuevo León, por lo que repicaron en el Colegio de San Nicolás; poco antes había habido ya un repique empezado en Catedral, el cual fue por haber recibido extraordinario de que el señor Miramón venia para esta a marchas dobles. Cerca de la una de la tarde empezó con mucha más fuerza el fuego, tirado bastante con la artillería, y por el rumbo del Mesón del Refugio, cuyo Mesón estaba ya en poder de los federales. A las tres y pico de la tarde pasaron por la calle recta del fortín de la artillería la caballería, la

%p88–Vildosola–2025–10–15%

que pasó a todo escape con las armas prevenidas para hacer fuego también pasó toda la mulada, luego se supo que dicha caballería no iba a salir a ningún ataque, sino que iba de huida por haberse ya rendido, lo cual lo supimos por las señoras Terán las que vinieron para nuestra casa por estar reunidos por si algún desorden hubiera. Cosa de las cuatro de la tarde se percibe ya un gran alboroto, por estar allá entrando las fuerzas de Nuevo León. Luego que entraron empezaron a saquear varias casas haciendo fuego a las puertas, entre las casas que saquearon se encuentran las de don Matías Parra, la cual limpiaron completamente, la de Adame, la de Parada D. Tomás, la tercena de los Monjarás, la cerería del frente de la capilla del Rosario, la casa de don Guadalupe y don Juan Othón, la de don Mariano Villalobos, la de Porras, la del licenciado Chico Sein, la tienda del León de Oro, La Palestina, casi todas las de la plaza, la de Muriel, en fin otra multitud de casas; otras que solamente catearon, otras que balearon, y otras que empezaron a robar y, luego los jefes los contuvieron, entre ellas se encuentran la tienda

%p89–Vildosola–2025–10–15%

de Las Damas, la casa de los Dávalos y otras, algunos de los pendientes de Las Damas lo siguieron con las armas en la mano. Cerca de las siete de la noche parecía que ya se había sosegado un poco el desorden, más entonces empezaron a catear algunas casas, entre ellas la casa de las señoras Terán la cual catearon desde las siete hasta la nueve de la noche, habiendo dejado centinela en la azotea. Todos los consulados, el inglés y el español, los respetaron por las banderas que había a los que les pusieron guardias, algunas casas particulares les pusieron también guardia. Más tarde cosa de las nueve y media se fueron de nuestra casa las señoras Terán.

Julio

J.1. Hoy siguen cateando casi todas las casas con el objeto de ver si hay oficiales escondidos, han presado a varios que han encontrado, también varios padres han apresado y aún les han intimado con pistolas poniéndoselas en el pecho, al ilustrísimo señor Obispo también lo han insultado y se mudó de su casa al consulado inglés, en cuya casa

%p90–Vildosola–2025–10–15%

hay varias familias. En el Obispado había también muchas, más todas se salieron luego que entraron ahí. Hoy se fueron don Anastasio Parra, su esposa, y doña Teresa Rada para México. En la mañana entraron más de los de Nuevo León y la artillería. En la tarde salieron cosa de 800 de caballería con el señor Zayas para la Pila. Hoy se fue también con el señor Parra, el Prior del Convento del Carmen. Siguen cateando algunas casas.

V. 2. Hoy dieron las 12 y las 3 como es costumbre, pero nada más que en Catedral y San Agustín y no hubo repiques después. En la calle hoy todavía es muy poca la gente que anda y ninguna tienda de mi oficina, han abierto. Ayer llego a su casa don Tirso Vejo que se salió al Obispado el día 29. Hoy han seguido apresando a algunos oficiales, entre ellos al hermano de Doña Luisa Estrada. El señor Obispo es mentira se mudó al consulado.

S.3. Hoy dieron las doce, las tres, la oración y las ocho, como es costumbre. Hoy se ha sabido de otras muchas casas que han saqueado; entre ellas, la casa de Martínez la de Álvarez Sagastegui; la de Severin, la de Arreola, y otras muchas; según dicen, pasan de cincuenta las casas saqueadas, y de estas tan solas de particulares, fuera de otras muchas casas pobres. Hoy siguen presando no tan solo a oficiales sino también a muchos particulares entre ellos, a don Pascual García, el que ya salió por haber dado $300 de préstamo; también le exigen la devolución de las rentas de las casas que estaban adjudicadas; más de esto quedo de presentar las cuentas. También han presado al don Felipe Monjarás, a Carrillo, al licenciado don José Castillo, a don Pedro Sámano, a don Manuel y don Benigno Arriola y a otros muchos. Hoy dicen que el señor Zuazua fue a ver al ilustrísimo señor Obispo y que después de haber tenido una conversación bastante seria, le exigió un préstamo de $50,000 a lo que el señor Obispo dijo que de ninguna manera ni de dónde tenía con que poder dar dicha cantidad; más le ofreció, sin embargo; que, haciendo esfuerzos, daría $5000, más el señor Zuazua parece que no quedó conforme. En la noche, hubo alumbrados y cosa de las ocho pasó bastante caballería; no se sabe si entraría o saldría. Hoy se supo que el señor Alcocer el día 30 al tiempo de abrir su casa, le tiraron un balazo y le dio en el codo habiéndole amputado el brazo el mismo día. También a una

%p91–Vildosola–2025–10–15%

señora de la cerería del frente de la capilla del Rosario, al tiempo de salir de su casa a la de las Martínez en la hora de la entrada, le dieron un balazo en el brazo. Es nombrado prefecto el señor Prieto.

D.4. Hoy ya hubo misas, aunque no en todas las iglesias. Han apresado en este día a varios españoles entre ellos a don Rafael Urtetegui, a Toranzo, a don Juan, el dependiente mayor de Las Damas y a otros varios; se dice que los han apresado por motivo del préstamo, que entre varios componen la cantidad de $200,000 el préstamo que se ha impuesto. En la tarde salió un convite de rotos con música y en la noche hubo baile en la casa de las Arriaga. Hoy salió el periódico del gobierno con el nombre de “El Boletín de las Fuerzas de la Frontera”, en cuyo periódico insertan las comunicaciones de la intimación de la plaza, y la contestación.

L.5. Hoy en la mañana se fue la familia de licenciado don Joaquín Reyes. Hoy salieron libres los españoles que habían puesto presos ayer. Se sabe que don Pascual García no ha salido libre, sino tan sólo mudaron de la cárcel a Palacio. En la tarde

%p92–Vildosola–2025–10–15%

hubo música en le Cuartel del Carmen. Hoy hace tres días murió la señora esposa de don Francisco Camacho, también a resultas de unos golpes murió la señora Borja.

M.6. Hoy abrieron ya La Perla (tienda de ropa) siendo la única que ha abierto, muchos de los comerciantes se han ido fuera, entre ellos el señor Larrache. Hoy en la tarde hubo música en el Cuartel del Carmen. Hoy se ha nombrado ya gobernador don Eulalio Degollado, se ha nombrado el tribunal los mismo que lo componían en tiempo en que era también gobernador el señor Degollado y también Ayuntamiento. De prefecto ha nombrado a don Rafael Vega.

Mes.7. Hoy es gobernador y comandante general el señor Zuazua. Hoy también se dice que el señor Vega no quiso admitir la prefectura y que sigue le señor don Hilario Prieto.

J.8. Hoy en la tarde fusilaron a un tal Castillo (practicante del Hospital de San Juan de Dios) el delito fue porque habiendo venido con los de Nuevo León, desde Bocas o por uno de sus puntos dijo, que llegando aquí se había de vengar de un don Lucas (también practicante del mismo hospital) que según dicen había tenido una

%p93–Vildosola–2025–10–15%

incomodidad con él, y como habiendo llegado aquí lo anduvo buscando, y luego que lo divisó mando matarlo habiéndole dado cinco balazos. El lugar del patíbulo fue en el Cuartel de Artillería, habiendo formado parte de la fuerza. Hoy han empezado a tumbar el fortín del Moro.

V.9. Hoy en la mañana salió la Caballería según dicen son cosa de 2000 hombres, los que van a atacar a Guanajuato. En "El Botín oficial del ejército del Norte” se han publicado unos versos que compusieron al cuarto Batallón de Caballería del ejercito del Norte. También publicaron un verso que al señor Osollo compuso don Severo Reyes cuyo verso lo que hacen es ridiculizarlo y dicen que es hasta blasfemo; que han hecho por don Severo Reyes, dicen que, porque las iniciales que al fin tiene, son: S.R. También se publicó un himno compuesto a la entrada de las fuerzas de la frontera y otras poesías. En la tarde hubo música en el Cuartel del Carmen. Han salido libres don Manuel y don Benigno Arriola y don Pascual García, Carrillo y otros. Hoy llegó el señor don Rafael Aguirre, con don Fortunato Nava.

S.10. Hoy se fue el señor Degollado, para decirle al señor Vidaurri de la destitución del empleo de Gobernador, que hizo Zuazua; en la tarde, estaban citados varios individuos para una junta, más como a estos señores los cito Degollado y éste se fue, no hubo ninguna junta. Han empezado hoy a tumbar el fortín de la concepción y según se dice van a tumbar los demás. En la tarde hubo música en el Cuartel. Ayer se fue para la Hacienda de Peotillos, don Rafael Urtetegui con su familia, mi tío don Mariano y la familia de don Pablo Ibarra, habiéndose quedado Jacobo. Hoy se volvió a ir para Santa María del Río el señor don Rafael Aguirre. Hoy sacaron un depósito que estaba en la casa de don Rafael Aguirre, cuyo depósito lo dejó el coronel Ruelas, que estaba alojado en dicha casa.

D.11. Hoy se casó el señor Ruiz con la hija del señor Muriel. Hoy es nombrado prefecto el señor don Pilar Bustamante. Hoy se supo que el señor Degollado no ha salido de San Luis. En la tarde de hoy, hubo función de toros y circo. En los toros dicen que hubo sus insultos poniendo a los toros nombres, como Miramón, Alfaro. Hoy salió libre el padre Barbosa.

S.12. Hoy en la tarde cosa de las dos fueron a catear el convento de la Mer

%p94–Vildosola–2025–10–15%

ced, más como en dicho Convento hallaron el depósito de los soldados que estaban ahí, después de haberlo sacado, se llevaron a los Padres presos para el Convento de San Francisco. En la tarde música en el Cuartel.

M.13. Hoy es nombrado secretario de Gobierno el señor licenciado don Francisco Villalobos. Hoy en la tarde dieron libres a los Padres del Carmen, que estaban presos en el Convento de San Francisco; también dieron libres al Padre Huerta, al Padre Gonzales y al Padre Arias, el cual ya hace días estaba libre, y a nueve coristas también dieron libres hoy. En la noche tocaron dianas en los Cuarteles; según dicen, fue por la toma de Guanajuato. Hoy y en los días anteriores se han salido fuera muchas familias. Hoy en la noche, llevaron preso a San Francisco al Padre Mata.

Mes.14. Hoy cosa de las cuatro de la mañana, sacaron a todos los padres del convento de San Francisco, juntamente con los Mercedarios que estaban en San Francisco; a los que llevan presos no se sabe para donde; también al ilustrísimo señor Obispo se llevaron al que no lo dejaron ni desayunarse; sino que luego que se levantó, lo montaron en el coche que estaba en la puerta esperándolo, el que era de Zuazua; a todos los demás padres los llevaron a Caballo y separados los Franciscanos de los Mercedarios. Al salir del Convento, dicen se les fugó el R.P.F. Antonio Mata, más esto no se sabe de cierto. Cosa de las doce dicen estaban en los ranchos mas no se sabe de cierto porque no se sabe para donde los llevan. Hoy parió la señora de don Mariano Villalobos y también la de Evaristo.

J.15. Hoy se salió el Padre Cabañas y el Padre Gutiérrez y otras varias familias. Dicen, el señor cura de San Felipe está preso, más por empeños del Padre Saldaña, ha salido de la cárcel en que se hallaba.

V.16. Hoy por ser día de Nuestra Señora del Carmen, hubo misa cantada con su Majestad patente durante la misa, en su convento. Ayer llego de México don Hilario Tena.

S.17. Hoy en la tarde hubo Salves en la Merced, San Agustín y el Carmen.

D.18. Hoy se siguen saliendo varias familias; hoy se fue la familia del señor Obispo. Dicen que han dado orden para que se vuelva el Padre Quintero y el Padre Narváez (Mercedario) habiendo llegado ayer el Padre Salcedo, y el Padre Narváez Franciscanos. En la tarde de hoy hubo función

%p95–Vildosola–2025–10–15%

de toros y en la noche hubo retreta con música. Hoy se han fijado en las esquinas unos avisos para que todo ciudadano desde diez y ocho hasta cuarenta años, se presente en el servicio de la Guardia Nacional, y los que tengan excepción la presentaran en las mesas que, para dicho fin, están puestas en los Conventos de San Agustín y la Merced. El cuartel para la Guardia Nacional es en el Convento de San Agustín, donde hace días, pusieron guardia en el portillo.

L.19. Hoy en la tarde, hubo revista en el Cuartel de la Artillería.

M.20. Hoy se ha nombrado Magistrado al señor licenciado don José María Aguirre, por haber renunciado el señor licenciado Gordoa. Hoy murió la esposa de don Trinidad Domínguez.

Mes.21. Hoy se ha publicado un parte el que dice de la derrota de Miramón, más otros dicen que Miramón derrotó a Degollado y que viene para acá, no se sabe lo positivo. Hoy fijaron unos avisos en las esquinas en los que dice que, la persona que se halle un reloj de oro, de dos tapas, lo puede entregar en la imprenta del gobierno donde se le gratificara. Hoy empezó a salir el periódico del gobierno con el título de "El Liberal". En dicho periódico vienen lo siguientes nombramientos: secretario de gobierno, ha sido nombrado el señor don Francisco J. Villalobos; fiscal del Supremo Tribunal de justicia, ha sido nombrado el señor licenciado don Antonio Ávila; jueces de letras de la Capital, licenciado don Francisco Arriola y licenciado don Francisco J. Belaunzaran; jefe supremo de hacienda, el señor don Francisco Palomo; administrador de rentas, el señor don Juan N. Viramontes; contador, el señor don Antonio Marín; administrador de contribuciones directas, el señor don Maximiano Parra; administrador del papel sellado, el señor don Rafael Vega. En la noche murió el señor don José Ignacio Duque.

J.22. Hoy en la mañana murió casi repentinamente el Señor Velasco. En la tarde hubo revista con música y en la noche retreta.

V.23. Hoy ha habido alguna alarma; porque al medio día, empezaron a hacer el sanjón del fortín de la Concepción. Mucha gente se ha salido por temor de que Miramón venga; pues dicen está en Lagos.

S.24. Hoy amanecieron soldados en los fortines. En este día se han salido muchas familias; entre ellas las señoras Terán, Mariquita García, el licenciado Laso y otras varias. En todo este día han mudado tercios y baúles, a las casas de Chabot, Davies y Pigman, por temor de un saqueo. En la noche, hubo unos gritos

%p96–Vildosola–2025–10–15%

por una vaca que corrió por la calle, por lo que los soldados se alarmaron creyendo que era el enemigo.

D.25. Hoy a las cuatro de la mañana hubo salva y dianas lo que fue por celebrar el cumpleaños del señor Santiago Vidaurri. Hoy siguen saliéndose muchas familias entre ellas la de Estrada, la de Dávalos, las señoras Rivas, y otras también. En la tarde de hoy nos fuimos nosotros para los Ranchos.

L.26. Siguen saliéndose más familias de San Luis. Hoy hubo función en la Villa de la Concepción. En la noche de este día murió la señora doña Francisca Lacavex.

M.27. Siguen saliéndose muchas familias de San Luis que se dice que Miramón ha derrotado a las fuerzas que estaban en Zacatecas.

Mes.28. Se dice que Miramón espera en Zacatecas fuerzas de México para atacar a San Luis.

J.29. Hoy hubo misa cantada en los Ranchos habiendo tocado el piano el señor Zavala. También se dice que han salido de San Luis muchos soldados, habiéndolos quitado de los fortines. Se han cerrado las salidas de la Maltos y Artillería.

V.30. El fortín de la Concepción ya está concluido de levantar. Se dice que Miramón ha marchado para México donde fue llamado.

S.31. Hoy ha entrado a San Luis fuerzas de Vidaurri, habiéndoles hecho su recibimiento los suyos.

%p97–Vildosola–2025–10–15%

Agosto

D.1. Hoy han robado en San Luis la casa del R.P. Prior de San Agustín.

L.2. Hoy murió mi tío el señor don Pedro Dávalos.

M.3. Han empezado a abrir algunas tiendas en San Luis.

Mes.4. Se dice que Miramón viene para San Luis.

J.5. Han abierto en San Luis algunas tiendas más.

V.6. Se dice que Mejía ha entrado a Rioverde.

S.7. Hoy en la tarde agarraron a uno que bajo el nombre de federal andaba robando por el camposanto de la Villa de la Soledad de los Ranchos, a un tal Santa Ana habiendo ido antes a varias tiendas a beber vino sin pagarlo. Según dicen andaba robando en compañía de otros dos, más a estos no los pudieron agarrar. Luego que agarraron a ladrón susodicho, le quitaron el caballo y la pistola, y lo condu

%p98–Vildosola–2025–10–15%

jeron para San Luis. cerca del puente dijo buenas tardes y quiso correr; mas no pudo lograr su intento pues al momento le dieron de cintarazos.

D.8. Hoy en la tarde entraron a esta villa cosa de veinticinco hombres a caballo no se supo si serían blusas o no. Hoy en la noche hubo baile en la casa de Zavala.

L.9. Hoy se supo que los hombres que entraron ayer eran unos blusas disfrazados para ver si podían agarrar a unos ladrones que andaban por la Tinaja. Se sabe que en México han pasado por las armas al “rey dormido” (conocido por este nombre) se dice que lo hicieron porque quería matar o envenenar a Miramón, según lo que se encontró.

M.10. Hoy salieron algunos blusas de San Luis, según dicen van a encontrar al señor Vidaurri.

V.13. Hoy llegó a San Luis el señor Vidaurri habiéndole hecho los de su partido algún recibimiento.

S.14. Hoy en la tarde hubo vísperas y en la noche maitines en la Villa de Tlaxcala.

D.15. Hoy por ser día de la Ascención de María Santísima hubo función en Iglesia de la villa de Tlaxcala.

L.16. Hoy se estrenaron en la Iglesia de los Ranchos dos cuadros los cuales se pusieron arriba de las puertas de la Sacristía con vista para la iglesia. El primero representa las apariciones de María Santísima de Guadalupe y el segundo tiene una refugian con los autores de la salve. Hoy en la noche fueron de parte de la prefectura a catear las casas de las señoras Terán y Vejo a prender a los mozos; según dicen, por sospecha de que ellos hayan robado la casa de una ravillera vecina. Hoy han entrado fuerzas de Vidaurri.

M.17. Hoy nos trajeron de la hacienda de Peotillos un caballo. Llegó Jacobo al Rincón del Molcajete.

Mes.18. Se dice que Mejía ha derrotado ha Aramberri. Hoy han puesto en San Luis soldados en los fortines. Hoy tomó posesión de gobernador y comandante general el señor don Santiago Vidaurri. A algunos de los presos políticos que tenían en San Luis los mandaron para Monterrey.

S.21. Hoy hace algunos días fue llamado por el señor don Santiago Vidaurri, el señor don Rafael Vega para que leyera un periódico que hace algún tiempo públi

%p99–Vildosola–2025–10–15%

co en su contra. Luego que se le presentó lo mandó que leyera dicho papel; habiéndole preguntado antes si él lo había escrito, a lo que contesto que sí; como no quería leer el papel se mandaron por dos cabos los que, vinieron con sus varas y se le pararon a los lados; para que si no lo leía le pegaran. Visto esto empezó a leer y párrafo por párrafo se le preguntó porque lo había dicho, de este modo concluyo de leer el papel y lo mandaron preso para la cárcel. Hoy trajeron algunos presos de Santa María del Río. entre ellos a Verástegui, a don Francisco (hijo) y Primitivo Cabrera, a don José de la Luz Gómez, a don Tomás Parada y otros.

D.22. Hoy venimos de los Ranchos para San Luis; habiendo llegado no a nuestra casa sino a la de don Pilar Bustamante que está en el Santuario. Cerca de las tres de la tarde hubo salvas y repiques; según se dice fue por una noticia de México.

M.24. Jubileo en la Merced. Hoy un empezado a tumbar el Fortín de la Concepción. Han salido fuerzas por decirse que Miramón viene para ésta.

Mes.25. Hoy han seguido tumbando algunos fortines, dicen que las fuerzas que están aquí van a salir. Hoy han cateado todas las casas para sacar los caballos que encuentren también a nosotros nos sacaron el nuestro.

J.26. Hoy murió en Santa María del Río la esposa del señor don José de la Luz Gómez. Hoy se fue para Santa María el señor don Paulo Verástegui. Hoy se comenzó un triduo a la Beatísima Trinidad, en la Iglesia de San Miguelito.

S.28. Hoy en la tarde hubo ejercicio con música en el Santuario. Y se dice que en Querétaro y San Miguel han puesto preso a don Rafael Aguirre y también a don Carlos Aguirre que iban e San Luis a México.

D.29. Hoy hubo jubileo en la Iglesia de San Miguelito. Han salido dos piquetes de caballería no se sabe para dónde. Siguen tumbando las fortificaciones habiendo bastantes tumbadas. Hace algunos días se casó el señor Agustín Aguado.

L.30. Hoy se dice que Miramón se fue para México. En la tarde hubo ejercicio en el Santuario. Se empezó la novena en Tequisquiapan.

M.31. Hoy hace algunos fue nombrado capellán del Santuario el Padre Proa. También hace días llego a esta ciudad el señor Aramberri. En la tarde hubo ejercicio en Santuario.

Setiembre

Mes.1. Hoy hubo jubileo en el Convento de la Merced. En la

%p100–Vildosola–2025–10–15%

tarde hubo ejercicios en el Santuario.

J.2. Hoy se ha dado un decreto para que todas las personas que tengan pistolas de Colt las entreguen; y que en el caso de no entregarlas, se catearan las casas y a la persona que se le halle, se le exigirá una multa y será llevado preso para los departamentos de Monterrey.

V.3. Hoy en la mañana hubo revista general en el Santuario habiéndola pasado el señor Vidaurri. Hace algunos días se abrió una nueva mercería; una de las tiendas que están en el portal del Parían.

S.4. Hoy en la tarde hubo un pleito en el Santuario habiendo ido para traer presos a los que estaban peleando, el señor Aguirre, don Francisco y cinco soldados de su cuerpo con otro oficial. Han traído preso al señor cura, el señor presbítero don Manuel del Conde y a el señor Garibay, canónigos de Catedral y también a don Néstor Toledo.

D.5. Hoy salieron libres el señor Conde y el señor Garibay y Toledo.

L.6. Hoy ha salido la caballería, parte de infantería y algunos carros. Se dice que salen porque el señor Miramón está ya en el Puerto de San Bartolo; donde lo estaban esperando las fuerzas de Nuevo León. Se ha dado un decreto para que la persona que esté de acuerdo con Miramón y se le encuentren cartas vaya desterrado por los departamentos de Monterrey. También se ha dado otro decreto para que todo español que no saliere en el término de 24 horas será desterrado. Hoy en la tarde se ha mudado el batallón estaba en la Merced, para la casa de Martínez que está en el Santuario. También mudaron algunos carros con parque y otros trenes de camino, pues según se dice deben de salir mañana a la madrugada.

M.7. Hoy han seguido mudando parque para el Santuario. En la tarde hubo vísperas y en la noche maitines en la Villa de

%p101–Vildosola–2025–10–15%

Tequisquiapan.

Mes.8. Hoy hubo jubileo en el Convento de la Merced. En la villa de Tequisquiapan hubo función de Iglesia. Se fue en este día para los Ranchos el señor don Mariano Cataño. A los españoles se les ha dado de término más, para su marcha, hasta el día de mañana habiendo exceptuado a algunos. En estos días se dice que el señor Vidaurri tuvo una incomodidad con el Señor Chabot (cónsul inglés) porque habiendo ido Vidaurri al Consulado a pedir dinero, le dijo el cónsul que no había, pues aunque tenía, lo tenía en depósito y no podía disponer de él; entonces se incomodó Vidaurri y mandó por fuerza para que lo sacan; entonces el Cónsul puso su pabellón, pero Vidaurri dijo que no respetaba banderas por lo que el Cónsul se incomodó, protesto y mando quitar la bandera y las armas Inglesas habiendo sacado Vidaurri algún dinero.

J.9. Hoy han seguido mudando para el Santuario más trenes, dinero y parque. Se dice que Miramón está en el Valle y que las fuerzas de Zuazua han retrocedido. Hoy han sacado algunos caballos de varias casas. Se dio un decreto para que toda persona que facilite recursos a la reacción se les exigirá el cuádruplo de lo que hayan dado para las tropas del ejército de Nuevo León. También Vidaurri ha dado una proclama donde dice que, teniendo que retirarse para combatir a la reacción deja encargado del gobierno al señor licenciado don Francisco J. Villalobos. Se casó don José María Arias con doña Dolores.

V.10. Hoy en la mañana han salido las fuerzas de Nuevo León con todos sus trenes de guerra, dicen que van a Bocas y que Miramón viene muy cerca En la tarde entraron las fuerzas que en el Puerto de San Bartolo tenía el señor Zuazua las que tomaron de cuartel el Mesón de San José y el Cuartel de la Artillería. El gobierno lo ha puesto Vidaurri en Salinas.

S.11. Hoy se dice que las fuerzas de Vidaurri no han pausado de Santiago y Tlaxcala y que hoy siguen su marcha. Muchos de los liberales se han salido por fuera por temor de que los saquen. Cosa de las 11 hubo un pequeño repique por lo que se alarmó la plebe y ahora se teme demasiado un saqueo por decirse que la plebe está muy alarmada. En la tarde hubo un pleito en el Santuario el cual lo separaron unos de Nuevo León.

D.12. Hoy cosa de las dos de la mañana salieron de toda prisa las fuerzas de Nuevo León que estaban aquí; al grado de dejar reses medio mu

%p102–Vildosola–2025–10–15%

ertas, otras vivas, arroz y otros varios comestibles, por haber recibido un extraordinario el que decía que las fuerzas de Miramón estaban en los Pozos. Cosa de las diez de la mañana empezaron a entrar las fuerzas de Miramón habiendo entrado él y Mejía. Como entró en partes a cada uno que iba entrando había un repique. En la tarde que ya estaban las fuerzas en sus cuarteles salieron patrullas para guardar el orden habiéndolo guardado durante la mañana varios vecinos que se reunieron en Palacio. Las fuerzas de Vidaurri dicen que no han pasado de Estanzuela y puntos cercanos aquí.

L.13. Hoy se han venido para San Luis varias familias de las que estaban fuera. Han puesto presos a varios entre ellos a Davies, Pigman, don Cipriano Martínes y don Ruperto Leiva. Hoy nos venimos nosotros de la casa de don Pilar Bustamante para la nuestra. Hoy en la tarde entro más tropa de caballería, infantería y artillería habiendo habido un corto repique. Han abierto algunas tiendas de ropa que estaban cerradas.

M.14. Hoy han seguido entrando algunas familias. El comercio está casi todo abierto. En la tarde hubo revista con música en el Cuartel del Carmen.

Mes.15. Hoy en la noche hubo serenata en la plaza. Cosa de las 11 hubo un repique general y salva de artillería lo que fue para celebrar el 15 de septiembre de 1810 del grito dado en la ciudad de Dolores. Salió libre el señor Pigman.

J.16. Hoy en la mañana hubo función en Catedral, después se fueron los señores que habían ido a la función para la Conservera del Santuario de Guadalupe donde dijo el discurso el señor licenciado don Santiago Hernández. Después de dicho el discurso; el señor Miramón montó en carretela y pasó revista su tropa. Mientras pasó la comitiva de Catedral al Santuario formaron valla los soldados desde Catedral al Montecillo; habiendo ido la demás fuerza al Santuario. Hubo Salvas a las cuatro de la mañana a las 12 y las seis de la tarde. En la noche hubo serenata en la plaza estando Palacio muy iluminado. Hoy salió libre don señor Martínez.

V.17. Hoy han llegado algunas familias de las que estaban fuera entre ellas las señoras Terán, la familia del señor Morillo y la Don Manuel Vejo. Cosa de las tres de la tarde una mujer que entró a casa no habiendo sido sentida se robó algunas cosas; cuando salió se vio más

%p103–Vildosola–2025–10–15%

habiéndole preguntado que quería dijo que buscaba a un capitán y no se sospechó nada de ella, hasta después que se vio lo que faltaba. Hoy salió tropa para Guanajuato no se sabe con qué objeto pues unos dicen que van por dinero, y otros porque dicen que esta amagado. Las fuerzas de Nuevo León dicen se están fortificando en el puerto de Carretas. Según dicen aquí van a hacer lo mismo.

S.18. Han empezado a poner los fortines los que están algunos pasos más que los de la vez pasada. Hace días salió libre el Señor Davies.

D.19. Hoy en la noche hubo retreta con música en el Cuartel del Carmen habiendo tocado primeramente en la plaza. Hoy un llegado de Santa María la familia del señor Estrada, la de Genaro Dávalos y las señoras Rivas. En la mañana salió caballería para Guanajuato.

L.20. Hoy se sabe que el ilustrísimo señor Obispo Barajas en compañía de los demás padres que salieron desterrados de aquí, están ya libres en Romita capital adelante de Brownsville. Ayer en la tarde llegó de Guascamá el señor don J. M. Gonzáles Mier con su hijo. Hace días es nombrado prefecto el señor don Juan Othón.

M.21. Hoy han seguido llegando varias familias, algunas que venían de Santa María se han detenido en los Pozos, por haberse dicho que habían vuelto los blusas. Hoy en la noche se tomó el dicho la señora Rivas con el señor Villasana.

Mes.22. Hoy se sabe por los periódicos que en México se ha descubierto el 15 del presente una conspiración que debía haber estallado el día 16; según dicen tenían muchas armas, parque, puñales, pistolas, banderas con muchos insultos y puñales pintados; todo esto estaba en una casa por la calle de la Pila Seca. También dicen había de empezar por cuatro incendios que por varios puntos habían de ser para después tal vez empezar el desorden. Se dice que las fuerzas de Nuevo León están por Bocas y puntos inmediatos y también se dice vienen a atacar. Los fortines siguen poniéndose, han puesto uno de la calle de los Burros, otro adelante del Moro, otro en la puerta de la casa de don Seferino Navarro y van a poner otro en la esquina de la casa de Cabral.

J.23. Hoy en la madrugada hubo repiques y cohetes en la Merced por ser la víspera de la Santísima Virgen. Hoy llegó de Guanajuato el dinero que fueron a traer para la tropa. En la tarde hubo vísperas en el Convento de la Merced y en la noche maitines; habiendo estado muy iluminada la Iglesia.

%p104–Vildosola–2025–10–15%

V.24. Hoy hubo función de Iglesia en el Convento de la Merced. La misa la dijo el M.R.P.F. Ramón Carranco y el sermón el M.R.P.F. Cipriano Quintero. En la tarde hubo corpus el que no pasó por la calle de la Estación acostumbrada, sino que volteo por la calle del Coliseo; tomó la Concepción; dio vuelta por la Cruz y luego entró. Hoy llegó de Santa María del Río el señor licenciado don Tirso Vejo y su familia.

S.25. Hoy a las cuatro de la mañana se casó el señor Villasana con don Refugio Rivas habiendo sido sus padrinos el señor Montenegro y la hermana del señor Villasana. A la misma hora o poco después, marchó toda la tropa con todos sus trenes para el Puerto de Carretas a donde van a atacar a los de Nuevo León. Cosa de las nueve de la mañana se dice que abandonaron el puerto y van más adelante, también se dice que Mejía para ver que si efectivamente habían abandonado el Puerto mando tirar ocho cañonazos. La pequeña fuerza que quedo aquí se mandó por las orillas para en caso de que alguna avanzada de los blusas cortaran para aquí y quisieran entrar a atacar en el acto.

D.26. Hoy en la noche de reunieron varios vecinos para guardar el orden por haber venido a avisar que en la Villa de San Miguelito había unos ladrones que querían entrar; más después de haber venido a avisar fue el señor Othón en compañía de otros a la villa y no halló nada. Esa misma noche se sacramentó el señor don Ignacio Lara habiéndole llevado el viatico de San Francisco.

L.27. Hoy se sabe que las tropas de Miramón han tomado el Rancho de Bocas y que no puede atacar al enemigo por estar en un cerro muy ventajoso pues tan solamente se han tiroteado con la artillería, habiendo habido uno que otro muerto. Hoy mataron unos indios de Mexquitic (según se dice) a un vivandero, también a un correo que venía le tiraron un balazo. Ha estado hoy el comercio cerrado por ser el aniversario de la entrada del Ejército Trigarante en México. Se puso un aviso en las esquinas para que toda persona que quisiera llevar víveres al ejército; fuera por su pasaporte a la Prefectura.

M.28. Hoy se dice que Miramón con sus tropas ha hecho un rodeo de tres leguas para pasar el río de Bocas, pues no los podía pasar por haberle he

%p105–Vildosola–2025–10–15%

cho unos hoyos las tropas de Nuevo León de modo de que no pasara Miramón; más ahora según se dice queda ya al frente del enemigo y tal vez hoy en la noche se romperán las hostilidades. Se ha puesto en las esquinas unos avisos para que toda persona se presente armada a la prefectura para guardar el orden mientras las tropas del ejército permanecen fuera.

Mes.29. Hoy nada se dice acerca de las tropas de Miramón, pues se cree estarán ya dando la acción. En la tarde llegó el capitán don Isaac Bermúdez, diciendo que por la Estanzuela le habían salido unos indios de Mexquitic más a poco rato habiendo salido cosa de doscientos hombres al mando del señor Barragán no encontraron nada. Murió el señor don Ignacio Lara.

J.30. Hoy a las dos de la mañana empezaron a repicar en Catedral habiendo seguido en todas las demás Iglesias y cuyo repique terminó hasta poco después de las tres de la mañana; hubo cohetes y salva, todo lo que fue por haber entrado a esa hora el señor general don Miguel Miramón con su escolta el que venía de dar la acción; pues no se supo aquí nada antes, por haber quitado dos extraordinarios que había mandado Miramón los indios de Mexquitic. El parte decía así que después de haber dado el ataque el día de ayer y habiéndose terminado a las dos de la tarde, después del fuego tan activo que hubo, había conseguido derrotar al enemigo completamente; habiéndole quitado 130 carros, llenos de parque, armamento y demás efectos que se robaron cuando ocuparon esta plaza, 18 piezas de artillería y 136 prisioneros siendo mucha la mortandad que hubo. Entre los del ejército se cuenta la muerte del Señor Barroso, el Señor General Don Tomás Mejía que le tiraron un balazo en una mano. El señor Villasana herido de un brazo el señor Vélez y otros muchos; lo mismo de parte de las fuerzas enemigas. Cosa de las tres de la mañana hubo gallo habiendo ido muchas señoras las cuales iban cantando con mucho entusiasmo. En la noche hubo serenata en la plaza.

Octubre

V.1. Jubileo en el Sagrario. Se dice que el señor Chacón habiendo cateado las casas de Ahualulco sacó muchos equipajes. Han agarrado diez carros más y ocho piezas de artillería. La papelera de Vidaurri también la han cogido. Se siguen

%p106–Vildosola–2025–10–15%

poniendo los fortines los cuales son por precaución, porque teniendo el señor Miramón que ir a Zacatecas, ha de dejar poca fuerza para el resguardo de esta plaza. Hoy han ido muchas personas a ver el campo de batalla también han traído a muchos heridos. Al señor Mejía lo trajeron en una camilla. Hoy hubo honras en el Convento de San Francisco por el señor Barroso el cual fue sepultado en la capilla de los Remedios. En la noche hubo serenata con música en la plaza. Se han puesto unos avisos para que todos los que quieran se presenten para formar el Batallón Primer Ligero. También han repartido unos prospectos para las funciones de teatro que va a dar una nueva compañía.

S.2. Hoy entraron cosa de 80 carros de los que Miramón quitó, también ha entrado un piquete de infantería que venía a retaguardia de los carros. Miramón ha dado unas proclamas manifestando que, si en los carros viene algo de lo que se robaron aquí, pueden presentarse los interesados para volverles lo que conozcan. En la noche hubo serenatas en la plaza, más tarde salió un gallo.

D.3. Hoy en la mañana hubo repiques por ser la madrugada de San Francisco. Hubo jubileo en San Agustín y Catedral. En la tarde hubo vísperas en el Convento de San Francisco y en la noche maitines, los que fueron a puerta cerrada. En la misma tarde hubo función de toros dedicada al excelentísimo señor general don Miguel Miramón. En la noche hubo primera función de teatro representando la comedia titulada “Guerras civiles”. También en esta misma noche hubo serenata en la plaza. Llegó mi tío don Mariano con don P. Ibarra.

L.4. Hoy hubo función en el Convento de San Francisco. La misa la dijo el R.P. provincial fray Manuel González y el sermón el M.R.P.F. Antonio Mata. Ha repartido el señor Thevanin unos avisos avisando que el día de hoy abre su establecimiento, que por las circunstancias había tenido cerrado desde el 30 de junio del presente. Se han repartido unos impresos dándoles las gracias a los excelentísimos señores generales, jefes y oficiales del ejército por el triunfo que el 29 del presente obtuvieron contra las fuerzas de Nuevo León. El impreso se titula “Los potosinos”. En la noche entraron algunos carros y tropa.

M.5. Hoy estuvo enfermo papá de sus dolores.

M.5 Hoy en la mañana entraron carros, algunos hasta con bueyes. Se dice que la Villa de Mexquitic mandó quemarla Miramón pues son muchos los reclamos

%p107–Vildosola–2025–10–15%

que le hacían de allá, hoy nada menos apedrearon los carros y aún querían quitarlos. En la tarde entró la demás tropa que faltaba entrar, habiendo entrado también la artillería que sacaron, pues las piezas quitaron entraron desde anoche, habiendo traído estirando los soldados a algunas. Cuando entró la tropa fue a encontrarla el 2° y 3° ligeros que habían entrado anoche, habiendo habido repiques cuando entraron, en algunas casas les tiraron los papeles que salieron ayer con el título “Los potosinos”. En la noche hubo serenata en la plaza.

Mes.6. Hoy en la noche hubo función de teatro. Llegó la familia de mi tío don Luis Guzmán.

J.7. Hoy hubo Te Deum en Catedral, en acción de gracias, habiendo asistido las autoridades y comunidades. En la noche hubo retreta con música.

V.8. Jubileo en el Convento de San Francisco. Hoy llegó el señor Revilla con su familia.

S.9. Hoy mudaron las piezas de artillería que estaban en las plazuelas de la Compañía y San Juan de Dios para el Cuartel de Artillería. Con motivo de esta mudada, se soltó el borrego de que venía los blusas, y algunas personas se alarmaron, mas no fue únicamente más que para componer algunas cureñas que están quebradas. Hace dos días llegó el P.F. Manuel Chavez (del Convento de la Merced). El que vino prófugo de Brownsville y se fueron para México. El día 27 del presente se volvió a descubrir otra conspiración en México. Llegó la familia del señor don Silvestre Portillo y la de don Anastasio Parra. Hoy han presado al señor Revilla por no haber querido pagar el préstamo que la vez pasada le impuso Miramón. Lo pusieron primero en la cárcel y después fue al Cuartel del Carmen. Se recibió noticia de que Paz había salido de México.

D.10. Hoy en la tarde hubo función de toros. En la misma tarde murió un coronel de guerrilla habiendo ido el cadáver acompañado de dos columnas de soldados hasta el lugar donde se sepultó. En la noche hubo función de teatro.

L.11. Hoy se recibió carta de Paz el que dice espera la contestación en Santa María del Río para ver si puede llegar o no. Salió una ley sobre que todos los desafectos al actual orden político saldrán del Estado al término de seis días y al estilo trae otros artículos. Hace algunos días renunció la prefectura el señor Othón, habiéndose encargado de ella el señor don Gregorio Sánchez. Salió libre el señor Revilla.

M.12. Hoy en la noche hubo comedia dedicada al excelentísimo señor general don Miguel Miramón.

%p108–Vildosola–2025–10–15%

En el “Boletín” (periódico del gobierno) se han publicado varias cartas que se encontraron en la papelera de Vidaurri. También se han publicado varios decretos dados por el señor Miramón, uno para que todos los empleados que los días 28 y 29 del pasado junio no se encontraron aquí queden destituidos de sus empleos y otro para que sean derogados todos los decretos que dieron los federales el tiempo que estuvieron aquí. Hace algunos días llegaron dos de los padres que estaban desterrados.

Mes.13. Hoy llegó el señor don Florencio Cabrera habiendo abierto su botica. Anoche en el teatro hubo mucha concurrencia, la pieza que se presentó fue “Dios mi brazo y mi derecho”. En la comedia uno de los ayudantes del señor general Miramón coronó a una de las actrices a nombre de dicho señor general. En salinas dicen ha muerto el señor licenciado don Félix R. Gómez.

J.14. Hoy a las cuatro de la mañana hubo salva de artillería. A las seis se formaron todos los cuerpos, habiendo formado valla desde la puerta de la Compañía hasta la del Santuario de María Santísima de Guadalupe. A las ocho salió de la compañía la Santísima Virgen de Guadalupe habiéndola acompañado los santos de las villas, muchas señoras de las más principales, las comunidades y autoridades. Tan luego como iba pasando la procesión se iba juntando la tropa, habiendo marchado el señor Miramón a la cabeza de toda la tropa. Al llegar al Convento de la Merced la Santísima Virgen, hubo salve y luego se fue para su Santuario. Al llegar al llano hubo salva de artillería, luego que llegó la Santísima Virgen a su templo toda la tropa se formó en el llano y un piquete en la puerta de la iglesia habiendo salido luego la misa, la que dijo el señor canónigo don Antonio Mascorro. La gloria fue cantada por las señoritas Zavala y la señora Rocha. El sermón los dijo el M.R.P.P.F. Manuel González. Al empezar la misa hubo descargas de infantería y salva de artillería, la que volvió a haber cuando alcanzaron y cuando se acabó la función. Acabada hubo en la casa del señor don Mariano Martínez un discurso a nombre de las señoras, dicho por el señor licenciado don Rafael E. Sousa, y otro a nombre de los señores dicho por el señor licenciado don José Castillo. Acabado que fue todo, los soldados pusieron las armas en pabellón y las señoras le dieron una comida que de antemano se les había preparado, cuando acabaron, se fueron a la casa del señor Martínez donde hubo una buena mesa habiendo asistido a ella el señor general Miramón. Luego que acabó la comida se unieron todos los cuer

%p109–Vildosola–2025–10–15%

pos habiéndose separado cada uno para su cuartel. También las señoras y señores se vinieron cosa de las cinco de la tarde. Un poco antes de las seis se vinieron las piezas de artillería habiendo hecho la última salva a las seis de la tarde en la plazuela del Carmen, y luego se fueron las piezas para su cuartel. El comercio permaneció cerrado todo el día. En la noche hubo baile en La Lonja el cual fue dado por los señores jefes y oficiales a las señoritas potosinas. Siguen poniendo los fortines en distintos puntos.

V.15. Hoy hubo función en el Convento del Carmen, en honor de Ma. Sa. Sa. Teresa de Jesús, la misa la dijo el M.R.P.P.F. Francisco de San Rafel, el sermón el R.P.F. Manuel de Jesús María. En la noche hubo retreta con música en la plaza. Llegó de México el señor don Mariano Vega.

S.16. Hoy hubo jubileo en el Convento del Carmen. Hoy se acabó de vaciar la campana mayor de dicho Convento que días pasados empezaron a hacer. En la tarde hubo salves en los Conventos de la Merced, San Agustín y el Carmen. Hoy llegaron dos padres franciscanos de los que desterraron para Brownsville.

D.17. Hoy cosa de las cuatro de la tarde formaron toda la tropa en la calle de la Cruz. Cerca de las cinco marchó por la misma calle, dio vuelta por la plaza, tomó por la Concepción y después dio vuelta por el Santuario, habiendo tomado la calle de la Cruz hasta la plaza, en donde cada cuerpo se fue para su cuartel. A la cabeza de la tropa marchó el señor general Ramírez. Este paseo fue según dicen por haber llegado de México un decreto en el que les concedían una cruz a los oficiales y medallas a los soldados en lugar de ascensos. Hoy llegó de Guanajuato la conducta para la tropa. Se ha publicado el parte oficial que el señor general don Miguel Miramón da al señor ministro de guerra y marina sobre la acción del 29 del pasado. En la tarde de hoy hubo función de toros. En la noche hubo función de teatro representando la pieza titulada “La viuda y la huérfana” terminando la función con un baile. En la casa de la señora doña Pepa Portillo hubo baile en la noche. En este día hubo una gran comida en la casa de las señoras Rocha a donde asistió el general Miramón. En el “Boletín Oficial” (periódico del gobierno) están insertos los siguientes decretos: uno, que no subsistiendo la constitución del 57 que declaró en su artículo 43 unido a Coahuila y Nuevo León, quedan separados el uno del otro, formando cada uno su

%p110–Vildosola–2025–10–15%

Departamento; otro, que se restablece el partido del Armadillo, como sección política del Departamento; y se formará de las municipalidades del Armadillo y San Nicolás Tolentino, 2° su cabecera será la Villa del Armadillo, 3° queda derogado en esta sola parte el decreto del 12 de junio del presente año, que dio nueva organización a los pueblos del Departamento. Han sido nombrados para formar el excelentísimo ayuntamiento los señores siguientes: alcaldes, 1° don Nicolás Mascorro, 2° don José María Fernández Rincón, 3° don Francisco de S. Guzmán, 4° don Silvestre López Portillo; regidores, 1° don Ricardo Espinosa, 2° don Agustín García, 3° don José María Coca, 4° don Pascual García, 5° don Joaquín López Hermosa, 6° don Ceferino Navarro, 7° don Ignacio Escalante, 8° don Agustín Gallardo, 9° don Silverio Aguilar, 10° don Irineo López, 11° don Guadalupe Othón, 12° don Herculano Marique de Lara; procuradores, 1° licenciado don Rafael E. Sousa, 2° don Mariano Dávalos. Distribución de sus distintos ramos: cárcel y comida de presos, don Ceferino Navarro; carros de policía, don Guadalupe Othón; casa de matanza, don Guadalupe Othón; revisión de cuentas, licenciado don Agustín García; obras públicas, don Ignacio Escalante; Santuario y función de iglesia, don Pascual García y don Agustín Gallardo; acueductos y paseos, don Ceferino Aguilar, coches de sitio, don Ricardo Espinosa; alumbrado, don Herculano Manrique; mesones y cementerios, don Joaquín López Hermosa y don José María Coca; diputación de alhóndiga, pesos y medidas, don Ricardo Espinosa; diversiones públicas, don Joaquín López Hermosa y son Ignacio Escalante, vacuna, don José María Coca. En el mismo boletín manifiestan la comunicación que da Vidaurri al Gobernador de Nuevo León, diciendo que ha perdido la mayor parte de sus trenes en la acción del 29 pasado. También inserta unos versos que en una caja de cartuchos de carabinas de Sharp encontraron escritos con lápiz, los que dirigen a Miramón.

L.18. Hoy en la mañana salió para México el señor general don Miguel Miramón, se dice que salió un bando para dar a conocer como primer jefe al excelentísimo señor general don Bernardo Márquez, habiendo habido repiques durante el bando. Es gobernador y comandante general el señor don Francisco Vélez. Los fortines los han seguido levantando, habiendo ya algunos.

M.19. Jubileo en el Convento del Carmen. Hoy cosa de las seis de la mañana salió

%p111–Vildosola–2025–10–15%

para Zacatecas la tropa a la orden del señor general Márquez, habiendo quedado para el resguardo de esta plaza cosa de 2000 hombres y algunas piezas de artillería. Se han agarrado a los presos que según parecen son capitanes de los blusas, uno, está preso en la cárcel y otro en el Convento de San Agustín.

Mes.20. Hoy a las 11 de la mañana, hubo dianas, repiques y salves, por haber tenido la noticia de haber sido derrotado el general Blanco en México, según se manifiesta por el parte que así dice: que habiendo sorprendido la fuerza de Blanco el número de 2000 hombres a Tacubaya y atacando la capital por San Cosme y San Pablo, siendo rechazados, se retiraron con bastante pérdida hasta los Remedios. Cuando atacó Blanco que fue el día 15 dicen que atacó por la Viga, pero el general Pérez Gómez (que había llegado en la mañana) en unión de Piña, salió a su encuentro tomándoles una pieza que tiene un letrero que dice “Brigada Pueblita” dicen que les hicieron michos prisioneros y que Blanco se metió hasta la Merced porque sabía que los puros de ahí habían de hacer algo, pero todos se hicieron para atrás. Con fecha 19 se sabe que la fuerza que siguió a Blanco lo derrotó, cuando iba en dirección para Morelia el jefe que mandaba la fuerza que derrotó a dicho señor es el general don Domingo Gayoso.

J.21. Hoy han puesto presos en la cárcel a muchos señores por ser liberales, pero en la noche salieron.

V.22. Hoy se ha dado un aviso en que se manifiesta al público que se vuelve a estancar el maíz en los términos que estaba antes. En el “Boletín” insertan los artículos de los exceptuados para entrar en el sorteo. Venado, Catorce, y Matehuala, a la aproximación de las fuerzas del señor Chacón, estos pueblos han vuelto al orden organizándose las autoridades que ha nombrado el Supremo Gobierno del Departamento. En un alcance al N° 3 del Boletín, insertan algunas comunicaciones: una, que da el señor García al señor Vélez de que el 20 del presente llegó el señor Miramón a México, otra, de lo ocurrido en la capital los días 15 y 16 del presente, en que habla de la derrota de Blanco; y la última, en que dice que también el señor García que a las 7 y 40 minutos de la noche fue remitido del interior al telégrafo, y es lo que sigue: y a las 10 del día las tropas del gobierno, alcanzaron (el 19 de octubre) en Huichilaque a los bandidos en número de

%p112–Vildosola–2025–10–15%

2000 hombres que capitaneaba Blanco y han sido batidos completamente, de manera que han quemado parte de su artillería y carros para estar más libres en su fuga. Hace algunos días se empezó a abrir una nueva calle la cual pasa por el Mesón del Refugio, a esta calle se va a poner el nombre de “Calle de Ahualulco”. Se ha abierto una nueva sombrerería con el título de “La potosina”.

S.23. Hoy en la mañana se subió la campana mayor del Carmen, habiendo muchos cohetes y cámaras durante la subida. Luego que llegó el primer cuerpo repicaron. Después la colocaron y a las dos de la tarde repicaron, habiéndola tocado entonces para estrenarla.

D.24. Hoy hubo jubileo en el Convento de la Merced. En la tarde hubo función de toros y en la noche hubo comedia, representando la comedia titulada: “Aventuras de Rouset o el valor mexicano”.

M.26. En la noche hubo función de teatro.

J.28. Hoy se presentaron al señor Vélez don Telésforo Sustaita y don Maximino Parra a los que pusieron presos en Palacio. Murió hoy don Agustín Herrera (encuadernador). En la noche hubo función de teatro representando la comedia titulada: “No gano para sustos”.

V.29. Hoy dicen que han sacado en el grillete a los Señores Sustaita y Parra. Han empezado a poner los puestos en la plaza para todos santos. Hoy se publicó en Catedral una capellanía que días, se han publicado otras.

D.31. Hoy en la tarde hubo función de toros y en la noche hubo teatro. representando una comedia de maquinaria. En la noche se abrieron algunos puestos de dulce de los que pusieron en la plaza.

Noviembre

L.1. Hoy en la mañana se han abierto todos los puestos de la plaza que anualmente ponen el día de Todos Santos. En la tarde hubo toros.

M.2. Hoy en la noche hubo música en la plaza: Parió la Esposa de Garaña.

M.3. Jubileo en el Convento de San Agustín. Ha renunciado la prefectura el señor don Gregorio Sánchez. Hoy han empezado a quitar algunos puestos de la plaza. Se ha encargado de la prefectura el señor don José María Rincón y es secretario el señor don Miguel Villalobos. Se abrió el Seminario.

V.5. Hoy se ha fijado en las esquinas el programa para el recibimiento que se le ha de hacer al ilustrísimo señor Obispo, que debe llegar el día de mañana

%p113–Vildosola–2025–10–15%

cerca de las seis de la tarde hubo un repique general, y cámaras.

S.6. Hoy se han puesto cortinas en todas las casas; estando muy adornado el camino de los Ranchos, en el que había muchos palos compuestos cuyo adorno llegaba más allá de la Concepción. A las once de la mañana llegó a la casa cural de la villa de la Soledad el ilustrísimo señor Obispo en compañía de algunos padres que lo fueron a encontrar hasta la Corcovada. Luego que llegó a dicha villa repicaron y fue conducido a la sala de dicha, en compañía de las innumerables personas que lo fueron a encontrar; mientras permaneció allí, dijo el señor don Juan Othón un discurso y el licenciado Ortega unos versos a los que contesto el ilustrísimo señor. Cosa de los tres cuartos para las doce montó el ilustrísimo señor para llegar a San Luis habiéndose venido tras de él, muchas carretelas con las personas que lo fueron a encontrar. Fueron a más cuatro comisiones nombradas por el gobierno, una, a nombre del Tribunal, otra a nombre de los militares, otra a nombre del Gobernador y otra por el ayuntamiento. Cuando venía el ilustrísimo señor en el camino hubo cohetes cámaras, de también algunos de los que venían a caballo dieron algunas vivas y mueras. Al llegar su señoría ilustrísima a San Luis hubo repiques y salva de artillería al momento fue a Catedral donde lo esperaban las comunidades y cantó un solemne Te Deum, y luego se fue para su casa. En la tarde hubo salva y repiques y en la noche serenata en la plaza.

D.7. Hoy entre tres y cuatro de la tarde llegaron el R.P.F.F. Orozco (guardián del Convento de San Francisco) y R.P.F.A. Almaguer. Luego que los divisaron hubo un repique en el Convento de San Francisco, donde lo esperaban; estando de antemano muy compuestos los claustros. En la noche hubo función de teatro. Hoy pario la señora doña Refugio San Juan.

L.8. Jubileo en el Convento de San Francisco. Hoy se sabe que las fuerzas del señor Degollado, han tomado a Guadalajara y que a su entrada cometieron muchas tropelías. Empecé a asistir a la catedra en el Colegio habiendo puesto de catedrático al señor Conde y al presbítero Telésforo Macías de catedráticos de teología. Hoy parió doña Dolores Sánchez.

Mes.10. Hoy han llegado de México, el señor don Rafael Aguirre y su hermano don José María. También llego la familia del señor don Matías Parra. Hoy

%p114–Vildosola–2025–10–15%

en la noche presaron al señor licenciado don José María Aguirre. También apresaron (según dicen) a otros varios entre los que está don Pepe Bustamante.

J.11. Hoy se mudó el cuerpo de Cazadores del Convento del Carmen, al de San Francisco. Es prefecto el señor don Pedro Gutiérrez. Han puesto preso a don Manuel Arriola, por insultos que hizo al licenciado don Manuel Castañeda, habiendo salido libre en el mismo día.

V.12. Hoy a las dos de la mañana parió Severiana una mujer.

S.13. Hoy a la oración de la noche se bautizó la chiquita de Severiana, habiendo sido sus padrinos de brazos, el señor don Florencio Cabrera y su señora doña Manuela Otahegui y de óleos el presbítero licenciado don Manuel del Conde. A la niña se le puso el nombre de Guadalupe.

D.14. Hoy en la noche hubo función de teatro. Se ha publicado un cuaderno con el título de "Persecución contra el ilustrísimo señor Obispo de San Luis Potosí, su destierro y el de las comunidades de San Francisco y la Merced”. Cuyo cuaderno explica todo lo que ocurrió desde la salida del señor Obispo y comunidades; este cuaderno se ha impreso con el objeto de desengañar a algunos que, dicen que tanto el ilustrísimo señor Obispo como las comunidades, estuvieron defendiendo los fortines el día de la toma de esta plaza por el señor Zuazua. Ha sido nombrado secretario de la prefectura el señor licenciado don José Castillo.

M.16. Hoy hubo jubileo en el Convento del Carmen. Hoy murió el señor don Ricardo Espinosa, de un ataque apopléjico, del que anoche se había enfermado.

Mes.17. Hoy jubileo en el Carmen. Hoy se ha fijado en las esquinas el programa de lo que deberá haber el día de mañana para el recibimiento del excelentísimo señor don Miguel Miramón. Ayer mudaron el 3° ligero del Convento de San Agustín para el Cuartel del Carmen. En la noche de hoy hubo algún alboroto, por la Alameda, cerca de la Plaza de Toros; por más que gritaron viva la federación viva. Con motivo de esto, subieron cosa de veinte hombres a la torre del Carmen y hubo uno que otro tiro.

J.18. Hoy hubo jubileo en el Convento del Carmen. Cosa de las doce de la mañana entró el señor Miramón, estando las calles algunas con cortinas en algunas casas. Al entrar, hubo salva de artillería y repiques. En la tarde volvió a haber salva y en la no

%p115–Vildosola–2025–10–15%

che hubo serenata con música en la plaza.

V.19. Hoy hubo jubileo en el Convento del Carmen.

S.20. Hoy hubo jubileo en el Carmen. Hoy en la noche tocaron a quemazón en el Convento de la Merced, la cual fue por San Miguelito.

D.21. Hoy hubo jubileo en el Carmen. En la noche hubo función de teatro y en la tarde toros.

L.22. Hoy jubileo en el Carmen. En la noche hubo retreta con música en la Plaza.

M.23. Hoy hubo jubileo en el Carmen. En la noche hubo alguna alarma por haber salido algunos piquetes de tropa de caballería e infantería. Según dicen para la villa de Santiago, que se había alarmado. Se ha encargado del gobierno el señor Icaza.

Mes.24. Hoy hubo función en el Convento del Carmen, en honor de San Juan de la Cruz; habiendo habido jubileo.

J.25. Hoy en la noche hubo función de teatro.

V.26. Hoy salieron para Guadalajara el Cuerpo de Cazadores y el Cuarto de Línea. Hoy en la noche empezó a haber Viacrucis en la Tercera Orden del Convento de San Francisco como siempre lo había habido, habiendo cesado de haberlo por las circunstancias.

S.27. Hoy hace algunos días se han fijado en las esquinas, unos prospectos de un nuevo periódico titulado: “Presente amistoso."

D.28. Hoy salió la primera entrega del periódico titulado: “Presente amistoso a las señoritas potosinas". En la noche hubo función de teatro. En la Tarde Toros.

L.29. Hoy se comenzó en el Convento de San Francisco el novenario a la Purísima. Han nombrado catedrático de (vísperas) de Teología al señor don Canuto Barajas; habiendo empezado a asistir a dicha catedra desde hoy. Hoy murió el señor don Manuel López.

M.30. Hoy se dice que traen de Pinos, a doña Melchora Arredondo y otros varios.

Diciembre

Mes.1. Hoy tomó posesión de canónigo el Padre don Margarito Cuéllar. Hoy salió para México el señor don Rafael Aguirre con su familia.

%p116–Vildosola–2025–10–15%

J.2. Hoy en la noche trajeron a doña Melchora Arredondo y otros de Cerritos, habiéndolos puesto presos.

V.3. Hoy se comenzó en el Santuario el novenario a María Santísima de Guadalupe. Hoy cosa de las cuatro de la tarde, se oyeron dos tiros; al momento se alarmaron todos, creyendo que era pronunciamiento, más luego se supo que era el parque que se es taba quemando en el Convento del Carmen. Mucha gente corría por las calles y muchas familias se salieron de sus casas yéndose unas para el Santuario y otras para distintos puntos distantes, pues creían que el incendio siguiese. Más tarde empezaron a tocar a fuego en el Carmen siguiendo en todas las Iglesias por lo siguieron saliéndose más familias. Cosa de las cinco, ya se estaba aquietando más el bullicio de la gente y se dijo que ya no había ningún riesgo, pues lo que únicamente hubo fue que unos soldados que estaban haciendo parque, al llenar unas granadas, como las estaban atacando con un fierro y una piedra al contacto de dichas cosas, salto una chispa y prendió a la granada que estaban atacando y a otra inmediata, habiendo tumbado la explosión de dichas granadas, una pared y habiendo habido algunos quemados, muertos y machucados. A esta hora se volvieron a abrir las tiendas pues durante el alboroto se habían cerrado. En esta misma tarde hubo rosario en el Santuario.

S.4. Hoy en la noche salió un piquete de infantería para Mexquitic a donde dicen que van a traer armas. En el “Boletín” oficial se ha publicado lo siguiente: Se prohíbe el uso de la asta bandera y escudos de armas por los cónsules extranjeros; pudiendo tenerlas tan solamente dentro. Se prohíbe el público los movimientos militares. Se prohíbe la circulación libre de capsulas de guerra. Se prohíbe la reimpresión de ejemplares sueltos de la novísima ley de justicia. Se han nombrado sensores de teatro los Señores, licenciado don José Castillo y licenciado don Florencio Ávila. Se han nombrado promotores fiscales de imprenta los señores licenciados don Ramón Adame y licenciado don Miguel Lazo.

D.5. Hoy en la noche hubo función de teatro por la tarde hubo función de Toros.

L.6. Hoy en la noche hubo retreta con música en la plaza.

M.7. Hoy a las cuatro de la mañana hubo repiques por ser la víspera del día de la Purísima.

%p117–Vildosola–2025–10–15%

En la tarde hubo vísperas en Catedral y en el Convento de San Francisco. En la noche hubo maitines en Catedral, y en la plaza retreta con música.

Mes.8. Hoy en la mañana hubo función de Iglesia en el convento de San Francisco y Catedral. La misa en la primera, la dijo el R.P.P. del Convento del Carmen y el sermón el R.P.F. Antonio Mata. En Catedral predicó el señor doctor don Canuto Barajas. En la noche salió de Catedral rosario cantado. A las ocho empezó en la plaza la retreta con música.

J.9. Hoy se comenzó en el Carmen un triduo al Arcángel Señor San Miguel, para solicitar la protección divina sobre la campaña emprendida sobre Guadalajara, cuyo triduo fue costeado por la señora del señor Miramón. En los lujos del parían se ha abierto un almacén de estampas. Hoy se comenzó el octavario en San Francisco.

V.10. Hoy ha venido un nuevo retratista al Ambrotipo el que los hace en el Bazar Potosino.

S.13. Hoy se concluyó el triduo que el Convento del Carmen se le hizo al Arcángel Señor San Miguel, habiendo estado la misa muy clásica. Su Majestad quedó manifiesto todo el día, habiéndolo velado señores y señoras. En la tarde hubo vísperas en el Santuario y en la noche maitines.

D.12. Hoy en la mañana hubo función en el Santuario. La Misa la dijo el señor Ledón y el sermón de señor Mascorro. Durante la misa hubo tres descargas de infantería. A las cuatro de la mañana, a las doce y a las seis de la tarde; hubo salvas de artillería. Han convidado para una misa que el día de mañana se va a decir en el Santuario para implorar el auxilio divino en la campaña sobre Guadalajara. En la noche hubo comedia.

L.13. Hoy en la mañana hubo una misa cantada a Nuestra Señora de la Soledad en el Santuario; la cual mando decir el señor Gobernador por el feliz éxito de la campaña sobre Guadalajara, habiendo a concurrido mucha gente a dicho acto religión. Durante la misa hubo tres descargas de artillería. En la noche hubo retreta con música en la plaza.

M.14. Hoy en la noche hubo rosario cantado en Tercera Orden del Convento de San Francisco. Luego que se concluyó el rosario, salió en procesión la Santísima Virgen habiendo alumbrado los terceros y terceras. Hoy murió Don Ambrosio Cárdenas.

%p118–Vildosola–2025–10–15%

Mes.15. Hoy se terminó el octavario de la Purísima, en el Convento de San Francisco. Se dice por voces sueltas que Miramón triunfó en Guadalajara. Se fue para parras Agustín Paz en compañía de don Irineo López. En la tarde hubo sermón en el Colegio de Niñas.

J.16. Hoy hubo jubileo en el Convento del Carmen. Empezaron las misas de aguinaldo y las jornadas en Catedral.

V.17. Hoy cosa de las diez de la mañana llegó el extraordinario de Guadalajara avisando que el 14 del presente a las siete de la noche las fuerzas del gobierno a viva fuerza pasaron el río por Poncitlan; el 13 pasaron los trenes y el 14 han batido al enemigo en más de cinco leguas de terreno desde las seis de la mañana hasta las tres de la tarde haciendo retirar al enemigo desde la Hacienda de Atequiza has el Pueblo de Poncitlan (seis leguas distante). En su retirada ha perdido dos mil hombres dispersos, doscientos muertos y heridos, cuatro piezas de artillería, parque, y fusiles. Este es parte oficial que el Gobernador recibió y el que se imprimió y se fijó en las esquinas. Luego que se recibió dicho parte hubo repiques en todas las Iglesias, salva de artillería, dianas por las calles, cohetes, música, diciendo vivas y mueras, y otras muestras de regocijo. En la tarde llegaron los lanceros de San Luis que estaban en la Corcovada. En esta misma tarde se fijó un bando para que todas las casas se adornen los días de hoy y mañana para demostrar el gusto de tan gran triunfo. El comercio permanecerá cerrado. Habrá en las noches de hoy y mañana serenatas con música en la plaza. Habrá también fuegos artificiales y juegos públicos. En la noche hubo serenata en la plaza como lo dice el bando.

S.18. Hoy en la mañana salieron cosa de quinientos hombres al mando del comandante general don Francisco A. Vélez los que van con dirección a Tula, o más acá, para atacar a Zayas que anda por dichos puntos y aun se ha acercado hasta la Corcovada. Durante el día de hoy han estado las tiendas cerradas por el bando que ayer se publicó también el frente de Palacio ha estado adornado y el pabellón enarbolado. Hoy salió a misa Dolores Sánchez la que fue en el Santuario. En la noche hubo serenata con música en la plaza

%p119–Vildosola–2025–10–15%

habiendo habido fuegos y dos palmas de luces de colores, el palacio y las demás casas de la plaza estaban iluminadas. Durante el día llenaron para el pueblo la pila de la plaza de pulque. A la serenata vinieron los fandangos de los pueblos. En la misma plaza hubo fuegos de chuzas carcamanes. Se sabe que el general Echegaray se pronunció contra el gobierno.

D.19. Hoy a las nueve de la mañana hubo repiques, salvas por haberse recibido la noticia de que Miramón entró a Guadalajara. Hubo jubileo en el Carmen, y sermón en Catedral. En la tarde hubo función de toros. En la noche hubo serenata con música en la plaza, estando muy iluminado el frente de palacio. En la misma plaza se volvió a poner pulque en la pila hubo fuegos y también juegos de chuzas carcamanes.

L.20. Hoy en la noche hubo retreta con música en la plaza.

M.21. Hoy hubo jubileo en el Sagrario.

J.23. Hoy se publicó el parte que da el señor general Vélez de que derrotó a los facciosos que acaudilla el señor Zayas. Hoy salió a misa Severiana en San Juan de Dios.

V.24. Hoy se acabaron las misas de aguinaldo y las jornadas. En la noche hubo rosario en Catedral. En el Carmen Catedral y la Merced hubo maitines y misa del Gallo. Hoy un hijo del cochero de Parra por prender una granada con el cigarro reventó y fue víctima.

S.25. Hoy en la tarde hubo función de toros. En la noche hubo benedicta en el Santuario.

D.26. Hoy hubo función de Iglesia en el Santuario habiendo asistido las autoridades, comunidades y empleados. La misa la dijo el señor Cabañas y el sermón el presbítero don Telésforo Macías. En la noche hubo maitines en San Juanico.

L.27. Hoy hubo función en San Juanico. En la tarde hubo corpus. En este día llego el R.P. Carranco.

M.28. Hoy se sabe y parte de la guarnición de México secundo el plan de Echegaray. Se dice que a Zuloaga lo han quitado de presidente.

J.30. Hoy ha habido alguna alarma por decirse que el 1° Ligero se quería pronunciar por lo que todo el día han estado en la

%p120–Vildosola–2025–10–15%

plazuela del Carmen las piezas con mecha ardiendo y centinela.

V.31. Hoy en la noche estuvo manifiesto su Majestad en Catedral y Colegio de San Nicolás, de las siete a la ocho para dar gracias por el fin del año. En esta noche hubo retreta con música.

Fin del año de 1858.

%p121–Vildosola–2025–10–15%

Año de 1859

Enero

S.1. Hoy se ha sabido por el correo de México que el día 23 del pasado el señor presidente don Félix Zuloaga fue destituido. Hoy a las 12 de la mañana hubo repiques y salva de artillería por haberse recibido un extraordinario el que dice que, las fuerzas que están al mando del excelentísimo señor general don Miguel Miramón han derrotado completamente (en Colima) a las tropas constitucionalistas y que han hecho prisioneros a muchos cabecillas no faltando únicamente más que derrotar a Degollado que esta con cosa de 3000 hombres en la Barranca de Beltrán lo que el señor general da por hecho. Voces sueltas dicen que a Blanco y cosa de 70 oficiales han fusilado más de esto nada se sabe de cierto. Hoy se comenzó en el Convento del Carmen un triduo a la Santísima Trinidad habiendo estado su Majestad manifiesto todo el día. Hubo jubileo en el Sagrario y convento de la Merced. En la noche retreta con música en la plaza.

D.2. Hoy hubo jubileo en el Carmen. En la noche hubo pastorela en el teatro.

L.3. Hoy hubo jubileo en el Carmen y San Agustín. En la primera Iglesia hoy se acabó el triduo que el primer día del año si empezó habiendo estado la misa, hoy muy clásica lo mismo que en los demás días. En la tarde hubo nocturno.

M.4. Hoy cosa de las ocho de la mañana hubo repiques y salva por haberse recibido el extraordinario de que el excelentísimo señor general don Miguel Miramón ha sido nombrado presidente. En la tarde volvió a haber salva y en la noche hubo serenata con música en la plaza. Hoy hubo jubileo en el Sagrario.

Mes.5. Se dice por voces sueltas que el general Miramón no ha admitido la

%p122–Vildosola–2025–10–15%

Presidencia.

J.6. Hoy en la noche hubo pastorela en el teatro. Se han presentado de oficiales Pedro Estrada y Ramón Sámano a los que ya se les dio sus despachos y están en el 3° ligero. En la tarde fusilaron a dos en el mesón de San Antonio, no habiéndoles dado más que tres horas para que se dispusieran. Uno, dicen que era espía de Zuazua, el cual había seducido a un cabo y el otro fue el cabo seducido el cual sedujo a otros cinco los que ya se habían desertado. En la noche hubo pastorela en el teatro. También en el Montecillo hubo carros compuestos, representando varios pasos del nacimiento de Jesús.

V.7. Hoy en la tarde llegó el señor Errazo el cual estaba en el Venado con cosa de 400 hombres y habiendo llegado fuerzas de los constitucionalistas en mayor número se vino. Salió a atacarlos el 3° de caballería. Se tomó hoy el dicho el señor general don Francisco A. Vélez con la señora Canizales.

S.8. Hoy hubo jubileo en el Convento de San Francisco. En la tarde hubo dobles cosa de las cinco por aniversario de la muerte de don Julián Reyes, también salió "La Sombra de don Julián”. A las seis de la larde hubo repiques, por anuncio del programa de lo que mañana se va a verificar por el completo triunfo de Colima. Se dice que Blanco ha tomado a San Miguel y que se dirige para acá por lo que hay alguna alarma y aún están haciendo el fortín de la Concepción.

D.9. Hoy en la mañana hubo Te Deum en Catedral. En la tarde hubo función de toros gratis y en la noche serenata con música en la plaza habiendo habido también fuegos artificiales. Todo esto fue para celebrar el completo triunfo obtenido en Colima. En el Carmen y San Agustín han atrincherado las torres. En este día llego un extraordinario del señor Mejía el que dice que se dirige para esta con algunas fuerzas para auxilio de esta plaza. Se fue el ilustrísimo señor Obispo.

L.10. Hoy se ha declarado la ciudad en estado de sitio, algunas familias se han salido. Se á recibido en este día un extraordinario de Guanajuato de donde dicen mandan 200 hombres de caballería para que reunidos con los, 300 que vienen de Mejía, piquen la retaguardia al enemigo también un extraordi

%p123–Vildosola–2025–10–15%

nario recibido de la "Villa de San Francisco" dice que Blanco llego el día siete a San Felipe; entró con 850 honores, 200 de ellos de caballería y el visto de infantería; trae cinco cañones siendo de ellos dos obusitos y tres de a 12, tres carros con parque y demás cosas. Coronado trae de 30 a 32. Agreda avanza hoy sobre San Felipe y pronto les dará el alcance. Según parece toman el camino de Zacateras, cuya noticia cierta se tendrá hoy en dicha villa, comunicando lo que se sepa para delante.

M.11. Hoy se ha recibido un extraordinario en que se dice que el señor teniente coronel don Catarino Agreda dio un ataque a las fuerzas de Blanco haciéndolos fugar con el rumbo para Zacatecas.

Mes.12. Hoy en la mañana salió de Catedral para el Santuario el cabildo eclesiástico con San Pedro para dar gracias como anualmente lo hacen. La misa en el Santuario la dijo el señor Mascorro. Cosa de los once de la mañana hubo una gran alarma porque se supo que las fuerzas de Zayas estaban en el Pozo de Luna, y más acá aún se dijo más, que estaban en los Ranchos. Con motivo de esta alarma algunas familias salieron fuera y otras se mudaron para dentro del fortín. A las 12 llego la guerrilla de Mejía y un poco después salió en compañía del 3° de Caballería al mando del señor general Vélez para atacar a los de Zayas, habiendo quedado de comandante general el señor don Juan Othón. Se fue para su hacienda el señor don Ramón Adame. Cosa de las cinco de la tarde llegó el general Vélez el cual se volvió de Laguna Seca porque no encontraron a nadie, habiendo mandado la caballería seguir para ver si los alcanzan y darles un ataque. En la noche salió tropa para proteger la entrada de Patrón.

J.13. Hoy hace dos días murió la madre del señor don Joaquín López Hermosa.

V.14. Hoy se ha publicado un parte el que confirma haber derrotado las fuerzas del señor coronel Taboada en el punto de Gachupínes, a la retaguardia del señor Blanco.

S.15. Hoy se ha recibido un extraordinario el que manda el general Miramón

%p124–Vildosola–2025–10–15%

diciendo que el día 10 del presente estando él, con el general Márquez en Palacio aconteció que, minado sin duda alguna de antemano, le prendieron y se desplomó todo el edificio; haciendo victimas a muchos, más milagrosamente el cuarto en que ellos estaban no le sucedió nada; visto lo cual se salieron y a poco rato cayó, no se sabe quién sería el que le prendió, voces sueltas dicen que fue una mujer. Llego la caballería que salió en persecución de los fuerzas de Zayas, y estas dicen que están otra vez en Peotillos.

D.16. Hoy hubo jubileo en el Convento del Carmen. Se dice que parte de las fuerzas de Miramón a derrotado de Pueblita.

L.17. Hoy se fue para Santa María del Río mi tío don Luis Guzmán con su familia.

M.18. Hoy en la noche salió el 3° de Caballería y parte de la Guerrilla Agreda para atacar a los constitucionalistas que estaban cerca del Llano Grande, cerca del Rancho del Garabatillo, sorprendieron una avanzada del enemigo, derrotando y haciéndola correr a escape. El enemigo tuvo varios muertos y heridos y se le hicieron cuatro prisioneros los que hoy acaban de llegar entre ellos uno es oficial. El 3° de Caballería continúa su marcha, por el rumbo de la Parada, en persecución de los bandidos. Se ha publicado por un “Boletín Extraordinario”, lo que el día 10 del presente sucedió en Guadalajara: dice que horas antes de que el parque que estaba en palacio se incendiará habían salido los señores generales. Miramón y Márquez cuyo incendio no fue como dicen que habían minado si no que fue pura desgracia habiendo parecido muchos. También se publicó el parte de la derrota de Camaño, Casales y Villalba los que fueron derrotados en Cuernavaca.

Mes.19. Hoy en la tarde iban a fusilar a las cuatro de la tarde a un sargento desertor del 1° más por empeños según dicen del Padre Carranco y el coronel Calvo lo indultaron estando ya hincado. Se dice que las fuerzas de Zayas se están fortificando en Bocas y que de aquí va a salir fuerza para atacarlos.

%p125–Vildosola–2025–10–15%

D.23. Hoy hubo función de toros.

L.24. Hoy supimos que Paz se fue para México. En este día hubo jubileo en la Merced.

M.25. Hoy entregó el señor Vélez el gobierno y la comandancia otro que llego de México. Pasaron revista al 3° de infantería.

J.27. Por extraordinario recibido de México se sabe que esta todo arreglado que el general Miramón llegó el 21 del presente y se volvió a encargar de la presidencia el señor Zuloaga. Llegó de Santa María mi tío don Luis Guzmán con el Padre Morales y licenciado Adame. En la noche hubo retreta con música.

S.29. Hoy en la mañana salió un bando para solemnizar la posición de la presidencia por el señor Zuloaga. En la noche hubo serena con música en la plaza. En estos días prestaron a Domingo Arriola.

D.30. Hoy en la mañana murió el capitán del 3° Ligero permanente don Manuel Quiroz. (hermano del general Vélez.) En la tarde trajeron el cuerpo de su casa al convento de San Agustín habiendo acompañado al cadáver muchos señores particulares. En dicho convento después de los funerales lo enterraron en la misma Iglesia.

L.31. Hoy en la mañana hubo función de Iglesia en la Merced en honor de San Pedro Nolasco.

Febrero

M.1. Hoy hubo jubileo en el Sagrario.

Mes.2. Hoy hubo función en el Desierto. En la tarde hubo revista con música en el Convento de San Agustín y en la noche retreta con música.

J.3. Hoy hubo jubileo en el Convento de San Agustín. En la mañana hubo revista del 1° ligero y la Guerrilla López. En la noche a la oración se murió el Gasmin.

S.5. Hoy en la mañana hubo sermón en el Convento de San Francisco habiendo habido ayer vísperas en honor del beato San Felipe de Jesús. Hace algunos días hubo un baile en una casa cerca de San Francisco costeado por

%p126–Vildosola–2025–10–15%

don Rafael Días de León (teniente coronel de Caballería) más sucedió que unos oficiales Bonora y López habiendo ido con unas leperas a dicho, se les negó la entrada luego se enojaron le pidieron al sereno la licencia, la rompieron y fueron a decir al comandante general Vélez que en dicho bando estaban brindando por la federación y en su contra. Luego que el señor Vélez oyó esto, se levantó y se dirigió para la casa del baile luego que entro mando a todos a la cárcel y el señor Días de León que fue el que primeramente se le presento diciéndole que todos los que estaban allí eran personas decentes, lo contrario lo mismo que a otros. Al día siguiente que el 29 del pasado habiendo contado al señor Vélez lo que había pasado salieron libres los que había puesto presos y al señor Días de León le fue a dar disculpa de lo que había hecho y a los señores Bonora y López los dio de baja después de haberlos presado.

D.6. Hoy en la tarde hubo función de toros, en la noche hubo pastorela en el teatro.

L.7. Hoy en la noche hubo retreta con música.

M.8. Hoy hubo jubileo en San Francisco y Villa de Santiago. Hoy se fue para Arroyos (según dicen algunos) y según otros para México, se fue el señor Vélez con el señor Othón. Se ha nombrado por el mismo Zuloaga presidente sustituto del excelentísimo señor general don Miguel Miramón.

Mes.9. Hoy llegó el general Vélez.

J.10. Hoy en la noche hubo retreta con música en la plaza.

V.11. Hoy en la mañana hubo bando, el que fue para solemnizar la presidencia del señor general don Miguel Miramón. En la noche hubo retreta con música en la plaza.

S.12. Hoy hubo jubileo en el Santuario.

D.13. Hoy hubo misa de tropa con música en el Carmen. En la tarde hubo función de toros. En la noche hubo pastorela en el Mesón de la Corona. En la misma noche hubo retreta con música en la plaza.

Mes.16. Hoy hubo jubileo en el Convento del Carmen.

J.17. Hoy en la noche hubo retreta con música en la plaza. En la mañana cosa de las dos de la tarde llego de Aguascalientes el general don

%p127–Vildosola–2025–10–15%

Joaquín Miramón con cosa de 700 hombres. Luego que entraron pasaron por Palacio y les repicaron.

V.18. Hoy cosa de las nueve de la mañana formaron a los cuerpos para el recibimiento del señor Callejo el que llego cosa de las diez un poco más tarde llego la tropa y luego que entro hubo repique general.

S.18. Jubileo en el Carmen y en el Sagrario. Hoy en la noche parió una niña la señora doña Luisa Murguía esposa de don Francisco Estrada.

D.20. Hoy en la mañana hubo misa de tropa en la Plaza de Armas. En la tarde hubo función de toros. En la misma tarde se pelearon el señor don Francisco Hernández con Guarneros porque como ambos iban pasando por el fortín de la compañía el señor Hernández dijo al señor Guarneros que pasara, éste lo tomó por burla y le dijo una mala razón entonces Hernández le dio un bofetón y siguió cada uno su camino. El señor Hernández entró en el estanquillo que está en la Plaza de Armas y mientras el señor Guarneros trajo una pistola de cinco tiros luego que vio en el estanquillo a Hernández le tiró un tiro el que ya mero le daba a la señora que estaba en el estanquillo. Entonces se le abalanzó Hernández y le iba a tirar el señor Guarneros otro tiro cuando le quitó la pistola y la tiró encima de una banqueta de la plaza. Hoy tomó posesión de la Comandancia General y del Gobierno el General, don Manuel Hernández. Se ha nombrado un nuevo Ayuntamiento que lo componen los señores siguientes: regidores, 1° don Francisco de S. Guzmán, 2° don Ignacio Escalante, 3° don Matilde Rojas, 4° don Mariano Dávalos, 5° don Anastasio Parra, 6° don Jacobo San Juan, 7° don Francisco Gordoa, 8° don Antonio Pereira (hijo), 9° don Mariano Taboada, 10° don José María Díaz de León, 11° don Antonio Rodríguez, 12° don Manuel Cárdenas; procuradores, 1° don Cayetano A. Yllescas, 2° don Fermín Sánchez. Hoy en la noche hubo retreta con música en la plaza. Está de prefecto el señor López.

L.21. Hoy en la mañana salir para México el coronel don Joaquín Miramón con el 5° de Caballería. En la tarde fusilaron a un cabo que mató a un sargento. El señor Guarneros dicen que está muy grave de la herida o patada que le dio el señor Hernández. Hubo toros de aficionados.

%p128–Vildosola–2025–10–15%

M.22. Hoy cosa de las dos de la mañana salió tropa para el Venado por decirse que en dicho punto esta Degollado con todo su congreso. Hoy han empezado a componer la Plaza de Armas, esto es; han pasado las banquetas que estaban en la orilla para más adentro y van a enbanquetar al derredor.

Mes.23. Hoy se ha nombrado secretario del gobierno al señor don José María Morillo. En la tarde entro la Guerrilla Treviño. Ayer en la tarde hubo función de toros de aficionados. Ayer robaron La garita de Rioverde, unos doce que cayeron habiendo golpeado al mozo y herido muy mal al garitero.

J.24. Hoy hubo jubileo en el Convento de la Merced. En la noche hubo retreta con música en la plaza. Ayer a las 12 de la noche murió la señora doña Nieves Enriquez de Camacho. Ayer bautizaron a la niña de Estrada habiéndola apadrinado doña Dolores y don Luis Estrada.

V.25. Hoy ha repartido papeletas el señor don Manuel Calvillo como profesor de barbería, flebotomía y con conocimiento prácticos en cirugía. El que va a abrir el día de mañana su establecimiento en la calle de los Tumultos número 3.

S.26. Hoy cosa de las cinco de la tarde se publicó por bando el parte que el señor Taboada de al señor comandante general de haber derrotado las fuerzas que estaban en Charcas habiéndoles quitado mulas, armas, y algunos prisioneros entre ellos a el cabecilla de dichas fuerzas don Anacleto de la Rosa. Cuando salió el bando hubo repique general. En la noche hubo retreta con música en la plaza.

D.27. Hoy hubo misa de tropa en la plaza. Se ha nombrado una junta calificadora, y otra revisora para la contribución del uno al millar por la Ley del siete de febrero. La primera la componen los señores siguientes: don Casimiro Toranzo, don Herculano Manrique, don Pascual García y don Francisco Camacho; suplentes, don Pablo Ibarra, don Fernando Larrache, don Ladislao Vildósola y don Marcos Pérez. La segunda la componen los señores siguientes: el señor cura licenciado don Manuel del Conde, don Agustín Gallardo, don Nicolás Mascorro, don José María Coca, doctor don Tomás Parada, don Antonio Muriedas y don Hilario Delgado. En la tarde hubo función de toros. En la noche hubo pastorela en el teatro, habiendo tocado música afuera. Ayer salió para México el general don Francisco A. Vélez.

L.28. Hoy se han repartido los avisos para los bailes de máscaras que en el Carnaval va a haber en el teatro. En la tarde hubo toros de aficionado

%p129–Vildosola–2025–10–15%

y en la noche hubo retreta con música en la plaza.

Marzo

M.1. Hoy hubo jubileo en la capilla del Rosario en cuya iglesia días pasados se mudó la parroquia por irse a componer la de San Juan de Dios. Hoy anduvieron varias comisiones convidando para la función de toros de aficionados que el jueves se va a hacer (se ha dado un decreto de indulto de sargento para bajo).

Mes.2. Hoy se ha publicado el parte que da el coronel en jefe don Antonio Taboada, sobre el detall de la acción que el día 25 tuvo en el Real de Charcas.

J.2. Hoy hubo jubileo en el Convento de San Agustín. En la tarde hubo función de toros habiendo toreado varios aficionados. Asistieron a dicha función seis reinas de las que con anticipación se habían convidado. Las reinas fueron las señoritas siguientes: doña Petra González, doña Refugio Sánchez, doña Pachita Othón, doña Isabel Cañizo, una de las señoritas Lambarri, y una de las Ymas. Los toreadores fueron: picadores, don Primitivo Cabrera, don Francisco Gordoa, don Francisco Sánchez, los Rincón Gallardo y el señor Malabear; lazadores, don Carlos Gordoa y otros; toreros, don Ignacio Ulibarri, don Ceferino Puente, don Juan Gutiérrez, don Pilar Segura, don Agustín Rodríguez, Alday, y dos oficiales; muleros, don Manuel Muñoz, don Mariano Taboada, y don Ignacio Barajas, carretonero, don Manuel Cadena; locos, don Antonio Luna y don Antonio Valdés; cachetero, don Pedro Sánchez; el corneta, don Eustacio Segura; el que abre el toril, el señor Montero; recogedores de boletos, don Severo Reyes y el señor Puente. Luego que entraron las reinas y los señores generales don Manuel Hernández y el señor Callejo, batieron marcha la tropa que iba a partir la plaza, luego partieron la plaza hubo descarga y al acabar rindieron. Cuando se pararon dejaron unas naranjas con ramos formando un letrero. Luego la compañía de toreros llevó dichas naranjas a las reinas y algunas tiró el loco, acabado que fue todo esto empezó la función. Luego que se acabó la función montaron las reinas en carretelas acompañadas de los señores don Gregorio Sánchez don Juan

%p130–Vildosola–2025–10–15%

Ruiz Cañizo y don Tomás O. de Parada, llevando una escolta de caballería. A dicha función asistió mucha concurrencia de señoras y señores En la noche hubo retreta con música en la plaza.

V.4. Hoy cosa de las cinco de la tarde salió la tropa que estaba de guarnición aquí, para Guanajuato a cuyo punto dicen entraron las fuerzas de los constitucionalistas. Anoche hubo baile en la casa de don Francisco Cabrera.

S.5. Hoy hubo jubileo en Catedral y Convento del Carmen.

D.6. Hoy hubo jubileo en Catedral y Convento del Carmen. En la noche hubo bailes de máscaras en el teatro y en La Lonja.

L.7. Hoy hubo jubileo en Catedral y en el Carmen. En la noche hubo baile de máscaras en el teatro. Hace algunos días se ha nombrado prefecto a don Francisco de Sales Guzmán. En la noche hubo baile en el teatro.

M.8. Hoy hubo jubileo en los conventos del Carmen, San Francisco, Santiago, Tequisquiapan y Catedral. En la noche hubo baile de máscaras en el teatro. Se le entregó hoy al comandante general una carta de recomendación para Paz.

Mes.9. Hoy (ceniza) hubo sermón en Catedral, y San Agustín y en la noche en Tercera Orden de San Francisco. En la tarde llamaron a tomar ceniza en casi todas las iglesias. Hoy dio el señor comandante general la contestación a la carta que Paz mandó del presbítero don Amador Silva, en cuya carta dice puede venir. Hace días apresaron al señor Noyola.

J.10. Hoy en la noche hubo retreta con música en la plaza. En la misma noche se sacramento el señor don Tomás Cosío. En la tarde hubo sermón en la Merced. Hoy se comenzó en el Carmen la novena a señor San José.

V.11. Hoy en la mañana hubo sermón en Catedral habiendo predicado el P.F. Buenaventura Domínguez. En la tarde hubo sermón en San Francisco, y en la noche en Tercera Orden, en cuya iglesia predicó el P.F. Francisco Orozco.

S.12. Hoy hubo jubileo en el Santuario. En este día se ha publicado en el "Boletín Oficial" una ley para formar la Guardia Civil, la que, si compondrá de todos individuos que pasen de 18 años, cuya guardia no saldrá nunca sino sólo servirá de guarnición a la plaza en caso necesario. En la tarde hubo salves en el Carmen, San Agustín y la Merced. En la noche hubo alguna alarma, pero no se sabe el motivo.

%p131–Vildosola–2025–10–15%

D.13. Hoy en la mañana hubo misa de tropa en el Carmen. En la noche hubo baile de máscaras en el teatro, y en la plaza retreta con música. En este día hubo sermón en Catedral habiendo predicado el presbítero don Telésforo Macías. En la tarde hubo en el Carmen donde predicó el M.R.P.F. Manuel de Jesús María.

L.14. Hoy hubo sermón en el Colegio de Niñas en donde predicó el presbítero don Pablo Anda. Se sabe que las fuerzas constitucionales entraron a Querétaro.

M.15. Hoy en la tarde hubo sermón en el Convento de la Merced.

Mes.16. Hoy jubileo en el Convento del Carmen. Hubo sermón en la mañana en Catedral, en la tarde en San Agustín y en la noche en Tercera Orden de San Francisco. En la tarde fusilaron a dos que fueron los que días pasados robaron unos tercios de piloncillo que estaban en la garita de Rioverde habiendo herido al garitero.

J.17. Hoy hubo sermón en el Convento de la Merced. En la noche hubo retreta con música en la plaza.

V.18. Hoy hubo sermones en Catedral, Convento de San Francisco y Tercera Orden.

S.19. Hoy hubo jubileo en Catedral y Convento del Carmen. En esta última iglesia hubo función muy solemne y sermón el que predicó el R.P.F. Manuel de Jesús María. En la noche cosa de las ocho hubo repique general por haberse tenido la noticia que en el Colorado fueron derrotadas completamente las fuerzas federales, hubo serenata en la plaza habiendo dado primero la música una vuelta por la plaza, y yendo acompañada de una multitud de gente gritando vivas y mueras. En esta misma noche pusieron altares en algunas carpinterías por ser el día del santo patrono.

D.20. Hoy hubo sermón en Catedral y Convento del Carmen. En la noche hubo retreta en la plaza, y cosa de las 11 salió un gallo.

L.21. Hoy hubo sermón en el Colegio de San Nicolás.

M.22. Hoy se han publicado en un alcance al "Boletín oficial” varias cartas en que dicen del triunfo obtenido entre Querétaro y el Colorado por las tropas del Gobierno. Se dice que los blusas al mando de Villanueva están en Peotillos y que se dirigen para este. Hay mucha alarma más según pare

%p132–Vildosola–2025–10–15%

ce van a dejar sola la población. En este día hubo sermón en el Convento de la Merced. Hoy a las ocho y media de la mañana murió el señor don Matías Parra. En la noche enterraron a don Matías en el Convento de San Francisco.

Mes.23. Hoy en la mañana hubo honras fúnebres por don Matías Parra en el Convento de San Francisco. Algunas familias se han salido fuera por temor de que las fuerzas federales no fueran a entrar a esta capital. Cosa de las dos de la tarde tocaron parlamento las fuerzas que acaudilla Villanueva y Degollado habiendo venido de parlamentarios don Ruperto Leiva y don José María Aguado, con cosa de 200 hombres que se quedaron en el Montecillo, quedándose el resto en los Ranchos. Luego que se supo que se había contestado a los parlamentarios que no se evacuaba la plaza si no que si querían la vinieran a tomar, y que al momento se pusieron soldados en los fortines, muchas familias se empezaron a salir fuera de la capital, otras fuera de fortín y otras para dentro siendo un trastorno general. En la noche no hubo alumbrados ni serenos; las calles solas y mucho silencio, pues hasta poco después de las diez empezaron a correr la voz los centinelas. A la madrugada, salieron cosa de sesenta hombres para Santiago donde había algunos de ellos que fueron los que en la tarde habían tirado uno que otro tiro. Cuando llegaron a dicha villa en efecto encontraron a algunos, hubo unos cuantos tiros y se trajeron a seis prisioneros. En la noche dicen robaron una que otra casita de las de afuera. Degollado que estaba en Santiago se escapó a pie habiéndose salido por una ventana.

J.24. hoy amanecieron unos contra fortines y uno de los portillos de San Francisco (el que mira al norte) tapado con linternillas para tirar por ahí. La caballería que estaba en el Venado al mando de don Florentino López se espera hoy y esto sólo aguarda el general Hernández para salir a atacarlos fuera. Cosa de las 11 de la mañana se imprimió un papelillo en el que decía que el señor Patrón con cosa de 400 caballos venía en auxilio de esta plaza. En este día estaba la gente muy temerosa y creía que hoy fuera el ataque o si no que atacarían a don Florentino

%p133–Vildosola–2025–10–15%

López en el camino. En efecto así fue, pues a las tres de la tarde ya se sabía que en el Garabatillo habían tenido su encuentro cosa de las diez de la mañana de hoy y este desenlace se espera por momentos. Así fue pues a las cuatro de la tarde llegó la noticia de que el señor López en dicho punto los había derrotado completamente, habiéndoles hecho bastantes prisioneros y también, se dice que en el combate murió Villanueva. Al momento se mandó repicar en todas las iglesias, hubo dianas y en algunas partes tiraron cohetes. No bien se había acabado este repique general, cuando empezó de nuevo pues que en ese tiempo iba entrando la tropa con los prisioneros que según dicen son sesenta y tantos con la mitad de las fuerzas del gobierno, pues la otra mitad al mando de don Rafael Díaz de León quedó encargado de recoger el campo y seguir sobre los pocos que habían quedado. En la misma tarde salió de aquí la Guerrilla Trevilla con rumbo a la Corcovada para recoger los dispersos que vayan por dicho punto. Luego que acabo de entrar la tropa recogieron todas las guardias que había en los fortines y las llevaron a su cuartel. En la noche ya hubo alumbrados y serenos como siempre, también hubo retreta con música en la plaza. En este día llegó un extraordinario del general Márquez en el que dice manda 400 hombres para auxilio de esta plaza.

V.25. Hoy en la mañana hubo misa de tropa en el Carmen. En la tarde hubo salve en el mismo convento. Casi todas las familias que salieron fuera han regresado a sus casas.

S.26. Hoy se dice que las tropas que estaban en Matehuala en número de 700 y cosa de seis piezas de artillería. Se dice que las tropas de aquí van a salir. En este día han empadronado a todos los vecinos para que mañana se reúnan en Palacio para defensa de la población.

D.27. Hoy ha habido mucha alarma por decirse que las tropas federales vienen para esta capital y que el señor Hernández con toda la fuerza sale para México; para cuya marcha se han embargado muchas mulas y aún Bueyes, para que lleven todos los pertrechos de guerra. En la tarde empezaron a desembargar y dijeron que ya no salía la tropa por haber recibido el señor Hernández orden de Márquez de que no abando

%p134–Vildosola–2025–10–15%

nara la plaza pues que para su defensa mandaba fuerzas para que los saliera a atacar Hoy se formó la Guardia Civil la cual dio guardia en Palacio. En la noche hubo retreta con música en la plaza.

L.28. Hoy se dice que a Matehuala han llegado 1000 hombres de Monterrey. Se á publicado una proclama del señor Márquez. Ayer sermón en el Carmen hoy sermón en el Colegio de San Nicolás.

M.29. Hoy se reimprimió un parte que Callejo da al señor Márquez sobre la derrota de los constitucionalistas en El Colorado. Hoy hubo sermón en la Merced. En la noche se sacramentó don León Zavala.

Mes.30. Hoy hubo sermón en San Agustín (por la tarde) y en la noche en Tercera Orden del Convento de San Francisco. Hoy se publicó un parte que el general Márquez da al señor Hernández sobre la ocupación de Guanajuato.

J.31. Hoy hubo mucha alarma por varias noticias que se tenían de que se aproximaban las tropas federales. Muchas familias se han salido y se están saliendo. Han acabado de construir un nuevo fortín en la esquina del Portillo de San Francisco. En la noche hubo retreta con música en la plaza. Acabada la retreta y cosa de las once de la noche, hubo un repique general, el cual fue por haberse recibido la noticia de que el general Miramón había conseguido un nuevo triunfo, sobre los disidentes de la plaza de Veracruz.

Abril

V.1. Hoy hubo jubileo en la Capilla del Rosario.

S.2. Hoy se ha mudado don Rafael Urtetegui a la casa que ocupaba don Ignacio Lara. En la tarde salió parte de caballería con nueve carros de parque, se dice que la demás fuerza va a salir por lo que muchas familias se han salido fuera. Hoy han empezado a construir otro fortín en el Portillo de San Agustín. Se publicó el parte por el triunfo de Veracruz.

D.3. Hoy cosa de las 11 de la mañana salió toda la tropa que estaba en esta plaza al mando del general Hernández, llevándose todo el parque y municiones. Muchas familias y Padres se han salido por temor de que llegando los Federales no sean perseguidos, como la vez pasada. El señor Hernández antes de salir dejó encargada la plaza a los cónsules Chabot y Pereda. Luego que salió la tropa se empezaron a reunir en Palacio Ingles, Franceses y Españoles y muchos paisanos para guardar el orden. En la tarde y en la noche salieron patrullas de ingleses y mexicanos de caballería e infantería. En la noche se encendieron los alumbrados y los serenos rondaron sus manzanas como es costumbre. Antes de salir la tropa dieron libres a varios presos políticos entre ellos a Domingo Arriola y Noyola; toda la demás prisión se la llevaron con la tropa dejando la cárcel sola. Se sacramentó don Pedro Fernández.

L.4. Hoy han seguido las patrullas de particulares como ayer para guardar el orden. Muchas familias siguen saliéndose fuera. Se le puso una comunicación al señor Degollado para que venga a tomar posesión del gobierno, cuya comunicación fue firmada por los Cónsules Chabot y Pereda y por don Crescencio Gordoa que funge de prefecto. Hoy han traído las patrullas a cosa de cuatro leperitos que trataban de alborotar a los demás. Hoy murió don Pedro Fernández.

M.5. Hoy cosa de las once y media entraron las fuerzas constitucionales habiendo llegado Degollado con don Guadalupe García y todo su estado mayor. Luego que entraron hubo un repique general, pasaron las tropas por Palacio y se fueron para sus cuarteles. Dio una proclama Degollado. En la tarde a las cinco entró la demás tropa que faltaba la que según dicen entre toda llega su número a 600 hombres y seis piezas, cuatro grandes y dos chiquitas de montaña.

Mes.6. Hoy dio otra proclama el señor Degollado (dando garantías para que se abra el comercio sin ningún temor). Se han abierto algunas tiendas.

J.7. Hoy dio una proclama don Guadalupe García en la que dice que muy pronto marcha con sus tropas para Aguascalientes, a donde se va a reunir con las tropas de Zuazua y las que trae el gobernador de Zacatecas, para marchar sobre Guadalajara. Se ha abierto hoy todo el comercio. En la noche hubo retreta con música en el Cuartel.

V.8. Hoy ha llegado un nuevo relojero francés el cual puso su establecimiento en una pieza de la casa de don Pascual García cuya pieza mira para la calle de la cruz.

D.10. Hoy a las ocho de la mañana salió don Guadalupe García con toda la tropa dejando únicamente la Guardia Nacional para defensa de esta plaza. La tropa que sale con García no se sabe para dónde va pues unos dicen que para Guanajuato y otros que para Aguascalientes. En la tarde trajeron en una camilla al licenciado don Francisco de P. Villanueva, el cual está herido de una pierna cuya herida la recibió en la acción que tuvieron cerca del Garabatillo siendo falso por lo tanto el que había muerto como en el parte que publicaron lo decía. Hace algunos días presaron al sacristán del Carmen porque éste, cuando le dieron de palos a don Ruperto Leiva dicen fue uno de los que se rieron, y ahora el mismo señor Leiva lo han mandado poner preso. Hoy salió un "Boletín Oficial" en el que insertan las proclamas que Degollado y García han dado. Han llegado muchos de los que se fueron con ellos el día 10 de septiembre del año pasado, entre ellos el doctor Sousa, el licenciado Chico Sein, Gascon, y otros. Se ha encargado de la Administración de Correos, el señor don Santiago Ramos; prefecto ha sido nombrado, el señor Viramontes; secretario de Gobierno, don Rafael Vega; oficial primero, el señor Santelices; oficial mayor, el señor Huisi; administrador del Hospital de Pobres, don Ignacio Gómez. El ayuntamiento ha vuelto el mismo que estuvo la vez pasada; administrador de la aduana, el señor Barragán. Ayer empezaron a tumbar algunos fortines. Se han vuelto una que otra familia de las que salieron.

L.11. Hoy han acabado de tumbar algunos fortines entre ellos el de la Concepción, el Moro, la Cruz, y otros.

M.12 Hoy en la noche pusieron en la plaza una música de cuerda. Ayer llegó el presbítero don Mariano Saldaña, también llegó el señor don Francisco Palomo.

Mes.13. Hoy han acabado de tumbar algunos otros fortines.

J.14. Hoy se supo que mataron al señor don Manuel Hernández y al hermano el licenciado lo hirieron unos ladrones.

V.15. Hoy en la tarde hubo tres horas en el Convento del Carmen habiéndose estrenado en dicho Convento una Virgen de los Dolores la que trajeron de Querétaro, también se estrenó un velo con el que está tapado el altar, la música estuvo muy buena y hubo mucha concurrencia. Hoy salió la conducta para Tampico.

D.17. Hoy en la mañana cerca de las nueve murió el señor don León Zavala. En la tarde de hoy vino en procesión el señor del Refugio de la Villa de la Soledad; habiendo entrado el señor en Catedral.

L.18. Hoy en la tarde hubo procesión la que salió de Catedral; habiendo salido en dicha procesión, la imagen del Señor del Refugio.

M.19. Hoy en la mañana hubo función en el Sagrario al Señor Milagroso. En la tarde hubo procesión, saliendo esta de Catedral. Se dice que en México han sido, derrotadas las fuerzas del señor Degollado. En la mañana de hoy llegó en procesión el Señor del Montecillo el que salió en la procesión de en la tarde.

Mes.20. Hoy en la tarde entraron las tropas de Zuazua. En la misma tarde hubo procesión la que salió de San Sebastián.

J.21. Hoy por ser el Jueves Santo hubo monumentos en Catedral, el Carmen, San Francisco, Tercera Orden y Colegio de San Nicolás. En la tarde hubo procesión la que salió de Catedral, y salió en dicha procesión Nuestro Padre Jesús. En la mañana de hoy asistieron a los oficios las autoridades. En la noche salió el cabildo, como es costumbre, a rezar las estaciones siendo el P. que salió con él, el presbítero don Regino Téllez.

V.22. Hoy en la mañana hubo oficios en las iglesias donde hubo monumentos, habiendo asistido el cabildo, a los oficios de Catedral. A las 11 hubo sermón de las Caídas, habiendo salido Nuestro Padre Jesús, de Catedral, los sermones de las Caídas fueron, uno, no la plazuela de la Catedral, otro en al portillo de la Merced, y otro en el portillo de San Agustín. A las tres hubo descendimiento en el Convento de San Francisco habiendo predicado el presbítero don Mariano Saldaña, después del sermón salió la procesión del Santo Entierro habiendo asistido el Gobernador y el Ayuntamiento.

S.23. (De gloria) Hoy como es costumbre hubo repiques cuando se abrió la gloria. En la mañana un poco después de los repiques entraron las tropas de don Guadalupe García. En la tarde hubo función de circo.

D.24. Hoy en la tarde hubo función de toros y en la noche hubo circo.

L.25. Hoy llego de señor Zaragoza de México. Se ha publicado un parte que da don Pedro Ogazón de haber ocupado el 14 del presente la plaza de Colima. En el Boletín oficial se ha publicado de la derrota que en México sufrieron las fuerzas federales. Hoy hubo letanía. Salió de Catedral al Convento de San Francisco. En la tarde entro parte del 5° de Caballería.

M.26. Hoy se fue para los Ranchos el señor del Refugio.

Mes.27. Hoy hace seis días se publicó un decreto para que todo eclesiástico que no quiera absolver a los que han jurado la constitución sin haberse antes retractado, serán castigados con arreglo a las leyes. Hoy se le ha quitado el mando al señor don Eulalio Degollado por varios cargos que le hacen, entre ellos por los tratados que tuvo con el general Morett, cuando el pronunciamiento de diciembre del año de 1857. También porque no ha publicado todos los decretos dados por Juárez y otros varios cargos; quedando nombrado interinamente por los generales, Zuazua y García, el presidente del Supremo Tribunal licenciado don Vicente Chico Sein, para Gobernador de San Luis. Hoy en la tarde yendo un blusa a caballo le tiró un pistoletazo a otro que venía a pie.

J.28. Hoy hubo junta de comerciantes para decirles que el señor Zuazua quería $16,000 de préstamo; mas todos dijeron que no podían dar nada. A esto les contestó que el gobierno tomaría sus providencias.

V.29. Hoy en la mañana salieron las tropas de Zuazua para la hacienda del señor Rincón Gallardo (Ciénega de Mata). Se dice que Traconis ha vuelto a atacar a México y que las tropas del gobierno vienen para esta. Hoy uno D. N. dijo que las tropas del gobierno estaban en San Felipe y habiendo llegado a oídos del señor García mandó llamar a dicho señor N. para preguntarle y este le dijo que lo había oído a uno que había llegado de dicho punto, pero que ya se había ido. El señor García dijo que iba a poner un extraordinario y que si era cierto le daría una gratificación y si no, lo fusilaría. Se han nombrado para el Ayuntamiento a los señores siguientes: alcaldes 1° don Francisco de P. Cabrera, 2° don Luis Rodríguez, 3° don Diego Montante, 4° don Francisco Escalante; regidores, 1° don Francisco Correa, 2° don Hilario Tena, 3° Cayetano Beltrán, 4° Don Zenón Rangel, 5° don Ramón Ramos Aguirre, 6° don Serapio Lozano, 7° don Ambrosio Espinoza, 8° don Jesús Rodríguez, 9° don Juan Orduñez, 10° don Irineo Galaviz, 11° don Ramón Calvillo, 12° don Silverio López; Procuradores; 1° don Manuel Oviedo, 2° don Hilario Prieto; para secretario de gobierno se ha nombrado al señor don Ramón Francisco Gamarra; para prefecto al señor don Silverio Vélez; administrador de la Aduana, el señor don Santiago Ramos y la administración de correos que dicho señor dejó la tomó el señor Mostacha. En San Miguel según se dice se sublevó el pueblo contra las fuerzas que traía el señor Zaragoza, mas éste después del motín tomó como prisioneros a tres o cuatro padres (de los que se fueron de aquí) y lo trae presos.

S.30. Hoy se impuso un préstamo por don Guadalupe García a cuyo préstamo han faltado algunos; más a estos, los ha puesto presos con pena de que den el duplo de lo que se les impuso y si no se los llevará cuando salga con la tropa. Entre los que se resistieron a dar el préstamo están los señores don José María Tornel y Bonilla, don Mariano Pedrajo y un dependiente de don Silvestre López Portillo.

Mayo

D.1. Jubileo en la Capilla del Rosario y en Catedral. Hoy en la tarde hubo función de toros. Hoy salieron libres los señores que presaron por motivo del préstamo.

L.2. Hoy en la mañana salió don Guadalupe García con 700 hombres que son los que componen la guarnición de Tampico. Hoy unos léperos quitaron las mulas de un cañón que iban a engancharlo, y mientras los soldados iban por otras mulas les quitaron: más habiendo sido vistos que los soldados los trajeron, les quitaron las mulas y se los llevaron amarrados en los cañones.

M.3. Hoy hubo función en las villas por ser el día de la invención de la Santa Cruz.

M.4. Hoy han desterrado al señor don Refugio Fernández. Han puesto preso al señor don Pepe Vejo. Hoy cosa de las dos de la tarde fue una patrulla por los dependientes de la panadería de “Las damas” los que se llevaron presos al convento del Carmen. Según lo que se sabe por lo que se llevaron presos a dichos señores es; porque como en el préstamo pasado se la impusieron $300 y no los pagaron, sino que con el señor García se arreglaron en términos de que, dando $400 que se les impusieron a la “Flor de mayo” entre comillas quedaba todo pagado; pero como en la mañana de hoy fue el mismo gobernador a verse con el dependiente mayor de “Las damas” y hubiese recibido algunas indirectas sin querer conceder con dar el dinero, resultó el que los presaron para embargar. Cuando cerraron las puertas de dicha tienda se pegaron unos papeles en las puertas los que decían: de orden del excelentísimo señor gobernador se ha mandado a cerrar esta casa de comercio, lo que se pone en conocimiento, para que cualquier atropellamiento que sobre ella se haga será castigado con arreglo a las leyes. Firmado por un don N. Portillo. Se han empezado poner una nueva mercancía en los bajos de la casa del señor Gregorio Lambarri.

J.5. Hoy se ha abierto la tienda de “Las Damas” y salieron libres los señores don Tomás Ruiz y don Juan Equillor que fueron los que ayer apresaron, dichos señores salieron porque entregaron el dinero que se les había exigido.

V.6. Hoy pasaron del Carmen a la cárcel al señor don Pepe Vejo.

S.7. Hoy se dice que el general Márquez entró a Morelia y que a los tres días después que salió en persecución de Degollado lo atacó y lo derrotó completamente. También se sabe que vienen tropas del gobierno para esta capital. Antenoche trajeron presos a los señores don Ceferino Puente, a su hermano y a otro.

D.8. Salieron libres los señores Puente.

L.9. Hoy en la mañana apresaron a don Felipe Castro y salió en la tarde. Han agarrado a mucha gente para soldados.

Mes.11. Hoy salió libre el señor don Pepe Vejo.

J.12. Hoy hubo jubileo en el Santuario de Guadalupe.

S.14. Hoy salió desterrado el señor don Juan Cañizo.

D.15. Hoy en la mañana fue la bendición de la bandera del Primer Batallón de la Guardia Nacional hoy en la Villa de Santiago. La bendijo el presbítero don Mariano Saldaña. Dio una proclama el gobernador don Vicente Chico Sein en la que habla del señor Degollado que por Charcas anda reuniendo gente para volver a tomar posesión del gobierno. Se ha impuesto un préstamo de $28,430 entre personas del Venado, Armadillo, Valle de San Francisco y otros puntos del Departamento. Se ha vuelto a encargar del juzgado de distrito al señor licenciado don Susano Quevedo. La prefectura de hacienda la desempeña el C. don Francisco Palomo. Subprefectos, han sido nombrados por el gobierno para el partido de Salinas el capitán don Jesús Sáenz, para el de Santa María del Río, don Marcelino Huerta y para el de Guadalcázar, don Carlos Tovar.

L.16. Hoy hubo jubileo en el Carmen. Salieron 100 hombres al mando del señor don Silverio Vélez para Cerritos a atacar al señor Degollado. Se ha publicado un decreto para que todo ciudadano de 16 años para arriba pague 2% para contribuir a la formación de la Guardia Nacional, y el que no lo hiciere se le asignarán $25 de multa. Ha llegado el señor don Juan Bustamante.

M.17. Se dice que cerca de Lagos hubo un encuentro de las fuerzas del gobierno con los constitucionalistas más respecto del triunfo se dice fue por parte del gobierno. Llegaron unos carros con parque los que dicen van para Zacatecas.

J.19. Hoy tomó posesión de la comandancia general de esta capital el señor don Juan Bustamante. Murió don Francisco Gaytán.

V.20. Hoy y algunas otras noches pasadas ha habido música en la plaza habiendo habido la noche de hoy de a dos músicas.

D.22. Hoy en la tarde hubo función de toros, en dicha función cantó el payaso unos versos pertenecientes al partido liberal y estando cantando, hubo uno que grito que se callara y a poco rato lo llevaron preso.

V.27. Hoy en la noche robaron a don Cástulo Camacho. Entre otro muchos que han desterrado se dio orden a los señores diputados licenciado don Crescencio Gordoa, don Alejandro Nieva, don José María Esparza y licenciado don N. Escobar por haber tenido el señor gobernador aviso de que el licenciado Gordoa había promovido una junta para ver de qué modo quitaban al licenciado Chico de gobernador. A todos esto los desterraron para el estado de Nuevo León. Se han publicado en el “Boletín” las comunicaciones que el señor Juárez ha dirigido al señor gobernador con respecto de la elección de su persona para gobernador en cuyas comunicaciones de su aprobación.

S.28. Hoy salió el convite para la bajada de la Santísima Virgen. Hoy se ha revocado la orden de destierro para los señores Nieva, Escobar y Esparza quedando desterrado únicamente el licenciado Gordoa pues según dicen los otros señores no sabían ni que objeto tenía la cita que el señor Gordoa les había propuesto. Se ha dado orden de destierro para los señores don José María Tornel y Bonilla, don Casimiro Severín, don Antonio Nieto, don Rafael Esparza, y don Susano Calderón, cuyos señores deberán salir en el término de 24 horas.

D.29. Hoy en la tarde hubo función de toros la cual fue dedicada para fondos para la función de la Virgen de Guadalupe. A partir de dicha función de toros asistió el señor gobernador, y fue a partir la plaza el primer batallón de Guardia Nacional. Hoy por varios empeños le quitaron el destierro al señor Calderón habiendo salido fuera del Estado los otros señores que juntó con él habían desterrado.

L.30. Hoy en la mañana cosa de las ocho tocaron dianas y cosa de la una hubo un repique casi general, lo que fue por haberse tenido noticia de que los constitucionalistas en Salamanca habían derrotado a las tropas que al mando de don Joaquín Miramón llevaban parque y dinero al señor Mejía, quitando por consiguiente de el dinero que llevaba. Hoy han desterrado al M.R.P. prior del convento del Carmen fray Francisco de San Rafael. Al señor Gordoa que había salido no con dirección a Nuevo León (donde le designó el gobierno para su destierro) sino con distinta dirección lo trajeron y le pusieron preso en el Palacio. En la tarde de hoy el padre Amezcua en compañía del padre Cámara y don Antonio Monreal (tonsurado) fueron a recibir para traerlos a Catedral los santos óleos, habiendo habido antes repiques y cuando entraron también. Hoy hubo letanía la que salió de Catedral para el convento de San Agustín.

M.31. Hoy hubo letanía de los santos la que salió de Catedral para el Carmen. Al M.R.P. prior del Carmen que había desterrado ayer ya no salió, sino que únicamente le intimaron orden para que él y fray Manuel durmieran en el convento. Se han acabado ya de tumbar todos los fortines, no habiendo quedado más que algunos montones de tierra en cada parte donde estaban. La Plaza de Armas también han empezado a embanquetar por dentro y las banquetas del Santuario la siguen haciendo. Hoy en la tarde llegó don Juan Zuazua con su escolta.

Junio

Mes.1. Hoy han apresado a uno de los hijos de don Andrés Barroeta; el motivo por que lo apresaron fue según dicen, porque habiendo levantado unos papeles (que eran unos pasquines) que uno que iba delante los había tirado, un sereno lo prendió y lo llevó con los pasquines que había levantado, y ahora dicen que él fue el autor de dichos pasquines, y que caso que no sea confiese quién fue. Han convidado para la bajada de María Santísima de Guadalupe que debe verificarse el día de mañana. Hoy han llegado muchos blusas unos en burros y otros en caballos, en la noche llegaron unos burros con parque, y otras cosas se creé que vendrán de San Felipe.

J.2. Hoy por ser el día de la Asunción, en la tarde trajeron a María Santísima de Guadalupe de su Santuario para la iglesia Catedral; habiendo ido como es costumbre los santos de las villas. En el convento de la Merced le cantaron salve, y allí fue donde se reunió el gobernador con el prefecto y otros señores para acompañar a la Virgen pues el Ayuntamiento la fue a traer desde el Santuario. En la procesión iban algunas señoras alumbrando. Hoy han desterrado a don Luis Fragoso y a otros.

V.3. Hoy se comenzó en Catedral el novenario a María Santísima de Guadalupe. Hoy han traído de Santa María del Rio a varios señores presos; entre ellos a don Joaquín López Hermosa, a don Marcelino (el músico), a don Fermín Sánchez y a don Francisco Manrique, a los que luego que llegaron los desterraron para fuera del Estado. También el subprefecto de Santa María don Francisco Aguirre mandó preso para esta capital al señor cura de “Tierra Nueva” el presbítero don Miguel de Jesús Mendoza por el motivo de que en sus pláticas doctrinales predicó contra la constitución de 57, y que tuvo insepulto por espacio de cuatro días el cadáver de don Francisco Gover por la circunstancia de haber jurado la constitución como alcalde de dicha villa y para haberle dado sepultura en sagrado fue necesario azotar al cadáver. Así esta puesta la comunicación que acompaña el señor Aguirre. Dicho señor cura lo han mandado desterrado para Monterrey. Se ha impuesto sin préstamo a algunas personas de las villas de San Nicolás y Armadillo, de Hidalgo y Arista.

S.4. Hoy en la noche se sacramentó del presbítero don N. Amezcua. En la misma noche por orden del gobierno mandaron prender a los P.P. del convento de San Francisco, pero sin duda, tuvieron algún aviso y no estaba ninguno en el convento, llevándose preso al portero por que dijo no sabía dónde estaban. Se asegura que al presbítero don Julián Morales en compañía de otros señores lo trajeron preso del Armadillo. Hoy hubo revista general.

L.6. Hoy en la mañana entraron las tropas de don Guadalupe García con tres piececitas de montaña. En la noche hubo música en San Miguelito por salir mañana las flores de la Virgen de dicha villa. En la noche de hoy murió don Domingo Ramos.

M.7. Hoy en la mañana vinieron a Catedral las flores de la Villa de San Miguelito. Hoy entró el señor Zaragoza con su escolta quedando lo restante de sus tropas en los Pozos. Salió para Tula el señor García con las tropas de su mando.

J.9. Hoy se sabe que las tropas del señor Hinojosa y Arteaga en el cerro del Marfil, al salir el general Vélez con las fuerzas de su mando que tenía en Guanajuato lo atacaron; más cuando estaban en la acción (que ya casi habían derrotado a Vélez) llegó el general Márquez en su auxilio y en pocas horas fueron derrotadas completamente las tropas de Hinojosa y Arteaga. Anoche apresaron a los señores don Marcelino Vega, don Ignacio Ferniza, y don Mariano Ávila. En el "Boletín" publican lo siguiente que la guerra de la Francia contra la Austria ya se ha declarado con motivo de la grave cuestión Italiana. El campo de las primeras hostilidades es en el Piamonte: ciento veinte mil austriacos han pasado ya sus fronteras retirándose ante éstas las tropas sardas. Cien mil franceses, primera división del ejército que manda en persona Napoleón III había salido a encontrar en distinta dirección a los Austriacos. La Inglaterra se ha declarado neutral en la contienda; la Rusia está de parte de la Francia y la Prusia no ha resuelto el partido que tomará. En el mismo periódico dice que en México el señor Zuluaga, el Padre Miranda y Fernández Jáuregui con otros varios personajes, han sido recluidos a prisión por Miramón que acaba de salir para Chapultepec.

V.10. Hoy a las cuatro de la mañana hubo repiques los que fueron por las flores de la plaza. En la noche hubo serenata en la plaza del mercado. El señor licenciado don Crescencio María Gordoa salió hoy con su hijo para Zacatecas a (donde) cuyo punto lo mandaron desterrado.

S.11. Hoy en la mañana hubo repiques por ser la madrugada de la víspera de la función de la Santísima Virgen. En la tarde fueron a Catedral las flores de la plaza, siendo en número de 20 bateas. En la misma hubo vísperas en Catedral y en la noche maitines. Hoy si a publicado por alcance al número 15 del Boletín la reclamación que hacen varios súbditos ingleses de México, con respecto de los fusilamientos de Tacubaya. Según el mismo periódico dice: que, entre Irapuato y Burras, los generales Hinojosa y Arteaga han derrotado a las fuerzas del señor Márquez. Murió doña Barbara Sanabria.

D.12. Hoy en la mañana (cosa de las 8) entraron las tropas del señor Zaragoza las que según dicen de los Pozos se fueron para los Ranchos, por cuyo camino entraron. El número de fuerzas según dicen es de 800 hombres. En la mañana de hoy hubo función en Catedral a María Santísima de Guadalupe habiendo asistido las autoridades. La misa la ofició el R.P.F. Francisco de San Rafael y el sermón el señor presbítero don Mariano Saldaña. Durante la misa hubo tres descargas en los términos de costumbre, las que fueron hechas por el batallón de Guardia Nacional. Después de la misa quedó expuesto el Divinísimo así como los nueve días de la novena. A las cuatro cubrieron al Divinísimo y a las cinco llegó el señor gobernador y el ayuntamiento. A poco que llegaron y después que llegaron los Santos de las Villas salió la Santísima Virgen de Guadalupe. La tropa que estaba formada en la Plazuela cuando dicha imagen paso por el frente, le hicieron los honores de costumbre y luego marchó tras de la procesión. Al llegar la Santísima Virgen a la Merced la fueron a encontrar las flores de la Alfalfa para reunirse. Cuando la Santísima Virgen llego a la Merced le cantaron "Salvé" y luego salió para su Santuario. En dicha iglesia se separaron de la procesión el gobernador el ayuntamiento y las más de las señoras que iban alumbrando. Hoy en la mañana después de la misa de la función fue la bendición de la bandera del 1° batallón activo de San Luis, por cuya bendición adornaron el frente del Seminario con cortinas y gallardetes por ser el lugar donde es el cuartel de dicho cuerpo. Hoy salió libre el señor don Marcelino Vega por no habérsele probado nada de lo que se acusa pues según parece, ha recaído todo en don Mariano Ávila quien fue según se ha visto por la semejanza de su letra, quien escribió unos pasquines en contra de las señoras de los liberales y los tiraron en varias casas; falta probar quien fue el autor de autor, de ellos para cuyo motivo todavía están en declaraciones él y Ferniza. Se ha encargado hoy de la prefectura el señor don Ambrosio Espinosa.

J.16. Hoy hubo jubileo en el Carmen. Hoy salió para los Pozos las tropas de Zuazua. Hoy en la tarde pasaron a la Cárcel a los señores Ferniza y Ávila.

V.17. Hoy pasaron preso al cuartel al señor don Ignacio Ferniza y al señor don Mariano Ávila se lo mandaron a su tío don Antonio para que estuviera en su casa mientras se le asignaba el destierro.

S.18. Hoy se ha puesto en la casa de don José de la Luz Gómez una como especie de panorama con el título de: “Viaje pintoresco”. Ayer a las ocho de la mañana se sacramentó el R.P. Macías (corista de los religiosos Franciscanos) Hoy en la tarde mudaron a los soldados que estaban en el convento del Carmen para el de San Agustín dejando en el Carmen una guardia de cosa 20 hombres tan solamente. En la tarde hubo vísperas en Catedral.

D.19. Hoy hubo función en la Villa de San Miguelito habiendo quedado durante el día expuesto el Divinícimo. En la tarde a las cinco cubrieron y después salió la procesión. En Catedral también hubo función y jubileo. Hoy en la mañana murió el R.P. Macías (Franciscano) habiendolo enterrado hoy en la tarde.

L.20. Hoy en la tarde trajeron en procesión a María Santísima de Guadalupe del Desierto para Catedral a donde se le va a hacer un novenario y triduo. La tropa la fue a encontrar hasta Tequisquiapan.

M.21. Hoy en la mañana llegó el Señor don Buenaventura Paz.

J.23. Hoy por ser Jueves de Corpus, hubo función en Catedral a la que asistieron las autoridades como de costumbre. La tropa del Primer Ligero formó valla por la estación que debía andar el Corpus. Acabada que fue la misa, salió el Corpus habiendo marchado detrás el Primer Batallón. En la tarde de hoy hubo función de toros.

V.24. Hoy en la tarde hubo función de toros.

S.25. Hoy en la mañana salió la tropa para formar el cuadro en el lugar en que fusilaron a un oficial de los del ejército que prendieron. Los fusilados debían ser dos, pero a uno lo indultaron. Hoy se casó el señor coronel teniente don Silverio Vélez con la señora doña Refugio Arriaga siendo sus testigos el señor don Rafael Vega y don Jesús Sáenz. Dicho casamiento fue sin amonestación ni bendición, ni ninguna ceremonia, sino que el señor Vélez habiendo ido con la señora Arriaga a ver al prefecto, este mandó llamar al señor cura don Refugio Téllez el que nos sabiendo para que cosa lo quería fue; y entonces al señor Vélez dijo que quería por esposa a la señorita Arriaga y esta contestó en los mismos términos y con solo la presencia del señor cura fue bastante para el casamiento. El señor cura contestó: que había sido sorprendido y que, si bien con su presencia aseguraba la validez del matrimonio, sólo esta no bastaría se para verificarlo existían algunos impedimentos canónicos que nulificaban dicho acto cuando no procede la dispensa. De acuerdo con lo que dijo el señor cura (decía), se retiró dicho señor. Concluido lo cual se levantó un acta que el señor Vélez quiso para conocimiento del público la que firmó el señor prefecto, el señor cura, el señor Vélez, la señora Arriaga y el señor secretario de la prefectura.

D.26. Hoy se fue para Santa María del Río Paz con toda su familia. En la tarde hubo función de toros. Hoy en la noche fue el señor gobernador con una escolta a la tienda del señor don José Pérez al que le fueron a sacar un dinero que tenía enterrado. Al señor canónigo Garibay que días pasados lo despacharon al Valle a donde le debían formar causa hoy se dice que lo quieren fusilar o que en su rescate dieran seis o diez mil pesos.

L.27. Hoy salió el presbítero don Mariano Saldaña para el Valle con una carta que lleva para que contengan la sentencia dada al señor canónigo Garibay mientras se reúne el dinero que piden. según se ha dicho se han juntado cosa de tres mil pesos entre varios particulares.

M.28. Hoy en la tarde salió libre el señor don Ignacio Ferniza el que dice también $200 (cantidad de dinero) pues de no hacerlo así le hubieran dado cincuenta palos.

Mes.29. Hoy por ser día de San Pedro y San Pablo hubo función en Catedral. Hoy llegó el presbítero don Mariano Saldaña del Valle; el que fue a contener la orden que habían dado, sobre la persona del señor canónigo Garibay. Según se dice le perdonan la vida si de $10,000 para cuya suma se han recogido 5,000 y para completarlo va a vender dicho canónigo una casa que tiene en Guadalcázar.

J.30. Hoy en la mañana hubo función en Catedral por ser día de la Octava de Corpus, después de la misa salió su majestad. en procesión dando vuelta por la plazuela. En la tarde hubo Corpus en la Villa de San Sebastián. Han traído preso al señor Gordoa, don Jesús cura de Ahualulco.

Julio

V.1. Hoy hubo jubileo en Catedral. Han apresado al señor don José María Coca porque dicen en su Hacienda tiene unos a abestrenes para cuya conducción para esta ciudad han salido cosa de cincuenta hombres. Al señor gobernador de la mitra el presbítero don Crescencio Rodríguez y el señor secretario presbítero don Nicanor Pérez, los han traído presos. Según se dice el señor gobernador puso una comunicación al señor presbítero Rodríguez para que el curato de Ahualulco se le diera al presbítero Proa, más dicho señor Rodríguez contestó que no podría en razón a que el señor Proa no podía administrar los sacramentos.

S.2. Hoy salió para Ahualulco el presbítero don Pedro Gaitán a donde va de cura interino. Hoy en la tarde hubo lista con música en San Agustín.

D.3. Hoy en la mañana hubo una misa cantada con su majestad manifiesto durante ella la que fue en honor de María Santísima del Socorro y por haber sido ayer el día de su función. Ha salido libre el señor don José María Coca por ser falso lo que decían pues lo que se encontró en su hacienda fueron unos carros que de paso habían llegado. La función de toros que debió haber sido hoy no fue a consecuencia de la lluvia. El señor cura Gordoa según se dice a salido libre bajo de finanzas. El señor gobernador de la mitra don Crescencio Rodríguez no es cierto que lo presaron.

L.4. Hoy hubo Jubileo en la Capilla del Rosario. En la tarde hubo procesión en la villa de San Sebastián. En la misma tarde hubo gran parada en el Santuario. En la noche hubo retreta con música. Hoy en la tarde fue herido del estómago el doctor don Santiago Filyisi por un lépero que sin duda lo iba a robar pues habiendo llegado a su casa, preguntó por el médico, el mozo le dijo que pasara. Luego que entró conoció el señor Filyisi que era algún ladrón (y) lo tumbó al suelo, habló al mozo para que viera un sereno que se lo llevara; y mientras salió el mozo se le escapó y corrió por la calle, el médico luego que corrió hizo lo mismo tras él, y cuando iba a poca distancia del lepero este volvió saco un puñal y lo hirió. El médico herido como estaba corrió tras él gritando, pero poco después ya no pudo por la herida.

M.5. Hoy en la tarde se llevaron en procesión a María Santísima de Guadalupe del Desierto para Tlaxcala, habiendo marchado tras de la procesión el Primer Batallón de la Guardia Nacional.

J.7. Hoy se comenzó en el Carmen la novena a María Santísima se ha publicado un decreto para que se acuñen $20,000 en moneda de cobre. También se dio otro decreto, para que todo el que en lo de adelante sirva a la reacción, devuelva el sueldo y si no el tiempo que estuvo sirviendo, ese mismo trabajará en obras públicas. En otro articuló dice: Que todo el que fuere llamado para ocupar un empleo y se negare a jurar la constitución, será considerado como un amigo del actual gobierno (federal) y por consiguiente será desterrado y otros seis artículos por el estilo. Se ha publicado en "El Boletín" y por separado, un reglamento para uniformar la instrucción primaria. Llegaron a esta capital los señores generales don José J. Álvarez, don Benito Gómez Farías y don Joaquín Degollado, hijo del señor Ministro de Guerra. En la noche de hoy hubo retreta con música.

V.8. Hoy en la tarde enterraron a un oficial en el convento de la merced, habiendo marchado detrás del cadáver la tropa. Luego que lo enterraron hubo la salva de costumbre y se retiró la tropa para sus cuarteles.

S.9. Hoy empezó a publicarse el periódico "El Liberal" en el que se publicó un decreto para que todas las viudas y huérfanos de los señores jefes oficiales médicos del ejército federal, que fueron hechos prisioneros en Tacubaya el 11 de abril del presente año gocen desde la misma fecha del sueldo íntegro de los señores que fueron víctimas. Se ha nombrado el nuevo ayuntamiento de los señores siguientes: alcaldes, 1° don Ramón Calvillo, 2° don Bonifacio Vargas, 3° don Ramón Ramos Aguirre, 4° don Serapio Lozano; regidores, 1° don Teófilo Porras, 2° don Carlos María Aguirre, 3° don Cayetano Beltrán, 4° don Jesús Rodríguez, 5° don Concepción Moreno, 6° don Tirso Condelle, 7° don Hilario Tena, 8° don Jesús Fernández, 9° don Juan Orduño,10° don Ireneo Galaviz, 11° don Cristóbal Yáñez, 12° don Urbano Herrera; procuradores, 1° don Manuel Oviedo, 2° don Fernando Bustamante. En dicho periódico "El liberal." dice que en Tepic deben de haber tenido un combate las fuerzas del señor Márquez con las constitucionalistas.

D.10. Hoy en la mañana murió casi repentinamente el señor don Brígido Castillo. También murió el señor don Francisco Contreras. Hoy en la tarde hubo función de toros y en la noche hubo maromas.

M.12. Hoy hubo jubileo en el Santuario.

V.15. Hoy han empezado a circular las cuartillas que se acuñaron por orden de gobierno. Hoy en la tarde hubo vísperas en el Convento del Carmen en la noche hubo en la plazuela un árbol de cohetes el que prendieron cosa de las 10 de la noche.

S.16. Hoy en la mañana hubo función en el convento del Carmen. La misa la dijo el M.R.P. Salcedo y el sermón el R.P.F. Manuel de Jesús María. En la tarde salió el corpus por la estación acostumbrada habiendo marchado detrás el Primer Batallón de Guardia Nacional. En la estación hubo tres altares que fueron en la casa de “La flor de mayo” en la casa de las señoras Terán y en la plazuela del Carmen. Se ha dado un decreto para que en la Villa de Mezquitic haya una feria anual durante diez días la que comenzará el 22 de septiembre y acabará el 8 de octubre. A un corista fray Francisco Rodríguez fue aprendido y conducido para la Guardia Nacional, por haber andado de seglar peleando con otros, según ponen en el “Liberal” la comunicación que el señor Chico puso al señor gobernador de la Mitra. A don Carlos Gordoa lo han apresado en México y lo ha degradado por robos rateros. La huerta del Carmen ya empezaron a transformarla en jardín público.

D.17. Hoy se comenzó el octavario en el convento del Carmen. Hoy hubo función de toros dedicada a María Santísima de Guadalupe habiendo asistido a ella el señor gobernador y habiendo ido a partir la plaza el Primer Batallón de Guardia Nacional. En dicha función sucedió que, al formar los cuadros para partir la plaza, al primer cuadro, sin duda algún fusil iba cargado con bala y le dio a un músico el que murió al momento. En el segundo sucedió igual cosa pues a otro músico Trujillo lo hirió el que según dicen también debe haber muerto e hirió al colonche. Hoy estrenaron los dragones del Batallón de Nacionales unos penachos. En la noche de hoy hubo maromas. En la plaza hubo retreta con música.

L.18. Hoy hubo jubileo en el convento del Carmen. Robaron en la noche $3000 de la mercería de Briol más como no pudieron correr con el dinero, dejaron dos talegas tiradas en la esquina. También al francés de la fonda le robaron unas onzas habiendo ido con un cajón de vino diciendo que ahí mandaban sus amos ese cajón porque iban a cenar ahí, el francés le dijo que lo metieran para adentro, y él entonces se fue hasta su pieza de donde se sacó dinero, según lo cuentan.

Mes.20. Hoy en la mañana hubo función en el Convento del Carmen. La misa la dijo el M.R.P.F. Manuel de Jesús María. En la tarde salió a ejercicio con música el Primer Batallón de Guardia Nacional. Hoy llegó de Valle la familia del señor don Francisco Estrada y las hermanas de Don Francisco Duque.

V.22. Hoy en la tarde trajeron en procesión a María Santísima de Guadalupe de Desierto de Tlaxcala para San Miguelito.

S.23. Hoy en la mañana hubo misa solemne en el convento del Carmen por ser el día de la Octava de María Santísima del Carmen. En la tarde hubo ejercicio con música en el Santuario habiéndolo hecho el Primer Batallón de Guardia Nacional. En la misma tarde salió (el Santísimo en procesión) del Convento del Carmen el corpus; por la estación que siempre ha pasado.

D.24. Hoy en la tarde hecho función de toros. Hoy en la mañana estrenaron los desgastadores del otro Batallón de Guardia Nacional unos penachos habiendo ido a misa los dos cuerpos al Santuario. En la noche hubo función de maroma y Teatro.

Mes.27. Hoy en la mañana se publicó por bando la ley sobre nacionalización de los bienes del clero, supresión de monacales y tolerancia de cultos que dio el señor Juárez Durante el bando hubo repiques. Hubo salva a las cuatro de la mañana a la hora en que se publicó el bando y en la tarde. En algunas casas hubo cortinas, y en la noche faroles; y esto fue, porque el prefecto dio una orden para que todo el que adornara su casa e iluminara se le aplicaría multa de $5 en adelante según sus proporciones. En la noche hubo serenata en la plaza y en Palacio iluminación. Hubo varios gallos en los que gritaron ¡Mueras! al clero, a los frailes, y otros por el estilo. El señor cura anduvo hoy haciendo inventario, en los conventos de lo que había. Se ha publicado una proclama del señor don Degollado. También se publicó una circular al ministro de Justicia.

J.28. Hoy en la mañana salió fuera de San Luis el R.P.P del Convento del Carmen Fray Francisco de San Rafael. También salió desterrado el señor don Cástulo Camacho. En la tarde pasaron al M.R.P.F. Manuel de José María pues como esta mañana después de haber dicho misa empezaron a llorar las mujeres, por esto sin duda le acusaron de que había predicado a puerta cerrada. Ayer salió en procesión María Santísima de Guadalupe por la Villa de San Miguelito y hoy salió también para conducirla de dicha villa, a la de San Sebastián. En la noche hubo iluminación y serenata en la placa a la que fue muy poca gente. En la noche salió libre el R.P.F. Manuel.

V.29. Hoy en la noche volvió a haber iluminación. Hoy salió fuera el R.P.F. Manuel de José María.

D.31. Hoy hubo función de toros, y en la noche hubo función de maroma y teatro. En la noche hubo retreta con música.

Agosto

L.1. Hoy hubo jubileo en la Capilla del Rosario. En la tarde salió en procesión María Santísima de Guadalupe por la Villa de San Sebastián.

M.2. Hoy por ser el jubileo llamado de Porciúncula estuvo abierta todo el día la Iglesia de N.S.P.S. Francisco y también la Tercera Orden. En la tarde se publicó por bando una ley para que en el convento de religiosos Franciscanos se abra un colegio, y en el mismo punto una biblioteca pública. En el convento de la Merced se va a poner el Hospicio de Pobres. También se ha publicado, aunque no por bando un manifiesto del señor Juárez.

J.4. Hoy hubo revista en el Santuario. En la noche hubo función de maromas en la Plaza de gallos.

V.5. Hoy llegaron los señores Traconis y Doblado. La pila que está en el centro de la plaza se está pintando y tiene en el frente de cada uno de los costados de la pirámide los siguientes letreros. Libertad: Igualdad, Fraternidad, y Progreso. En el libro que está arriba de la pirámide según dicen van a poner "Constitución de 1857". También la Plazuela de San Francisco ya se está acabando de enlosar y empedrar. Han sido nombrados catedráticos para el colegio que se va a abrir en el Convento de San Francisco los señores siguientes: señor director, presbítero don Mariano Saldaña, derecho Canónico e Historia Eclesiástica y Religión, catedráticos, licenciado don Antonio Ávila, derecho Romano e Internacional; licenciado don Carlos María Escobar, derecho natural de gentes y púbico; don José María Sousa, medicina legal y Forense; licenciado don Fortunato Nava, derecho civil, Patria y principios de legislación; don Florencio Cabrera, física y Química; licenciado don Mariano Villalobos, segundo curso de Matemáticas e Italiano; don Carlos Aguirre, primer curso de Matemáticas; licenciado don Susano Quevedo, historia, profesor; don José María García, dibujo; don Francisco Macías, lógica y Metafísica; licenciado don Pablo R. Gordoa, ética, profesor; don Mucio Gama, gramática Castellana; don Miguel González, Frances.

D.7. Hoy se estrenaron doce faroles en la plaza los que están puestos en cada uno de los pilares que forman las seis calles de la plaza. En la noche hubo retreta con música, y en la Plaza de Gallos hubo función de maroma. Hoy se murió la señora doña Mariquita Estrada.

L.8. Hoy hubo jubileo en Catedral. Se ha mudado la parroquia para el convento del Carmen.

M.9. Hoy en acabado de quintar la pila y está en la plaza; habiéndole puesto en los cuatro cuadros del cubo más ancho los siguientes letreros: Agustín Iturbide, Miguel Hidalgo, Joaquín Gárate y M. Márquez. Arriba de estos letreros en dos huecos que quedan, uno al frente de Palacio y otro a catedral pusieron: Julián de los Reyes y al otro lado; el nombre de un tal Barragán.

J.11. Hoy llegó el señor Blanco. En la noche hubo función de Maroma y en la plaza retreta con música. Se dice que Miramón ha salido de México para el interior a ponerse al mando de las fuerzas. También si dice que en Querétaro estuvo en conferencia con tres Obispos y que en México se van a reunir los otros R.R. Obispos.

V.12. Hoy hubo Jubileo en el Santuario. Hoy cosa de las doce de la mañana entró a esta capital el señor general don Santos Degollado. habiendo entrado en compañía de todos los que lo fueron a encontrar. Luego que llegó hubo un repique general después, fueron los dos batallones con la bandera a hacerle los honores debidos. A las tres de la tarde salió del cuartel la guardia para su casa habiendo llevado la bandera y la banda, más sin duda no quiso guardia y la volvió. En la noche hubo retreta en su casa (casa de don Rafael Aguirre a donde paró) y después se fue para la plaza donde estaba muy iluminado pues en el balcón de Palacio había un letrero con letras de palo en donde había vasos de colores con luces, que decía: Viva el excelentísimo señor general don Santos Degollado, además de esto toda la portada estaba con cazuelejas. La pila también estaba iluminada y al rededor unos sonetos y los nombres de todos los generales. En todas las casas hubo iluminación y en algunas cortinas por la tarde. El comercio estuvo cerrado y hubo salvas de artillería. Más noche y como cosa de las doce o más salió un gallo en donde hubo sus gritos de ¡Vivas! y ¡Mueras! En la plaza también se permitieron juegos como lechuzas carcamanes. Hoy dio una proclama el señor don Manuel Doblado a los guanajuatenses.

S.13. Hoy en la noche hubo iluminación. Cosa de las 10 y media hubo un repique general el que llegó a concluir cerca de las doce dicho repique fue por haberse recibido una carta en la que decía que, el señor Hinojosa había tomado a León y que había hecho prisionero al jefe que estaba en aquella plaza.

D.14. Hoy hubo iluminación y en la plaza retreta con música, la que primero estuvo tocando en la casa del señor general Degollado. En la tarde de hoy hubo función de toros. Se ha impuesto una contribución de un real por cada pase que se de en la aduana, y de cuatro reales por guía para la compostura de la alameda que se está habiendo en la guerra del Convento del Carmen.

L.15. Hoy en la noche hubo función de maroma, y en la casa de Degollado hubo retreta con música. En la mañana de hoy hubo función en la villa de Tlaxcala y por la tarde hubo procesión habiendo marchado la tropa.

M.16. Hoy salió para San Miguel el señor don Francisco Estrada.

Mes.17. Hoy en la tarde salió el Primer Batallón con dirección al Valle a donde van a atacar a las tropas del gobierno que se encuentran ahí. Hoy en la mañana murió don Agustín Ortiz. En la noche de hoy han salido fuera muchos de los jefes.

J.18. Hoy en la mañana pasaron en procesión a María Santísima de Guadalupe del Desierto de la Villa del Montecillo al Convento del Carmen en donde se le va a andar un triduo, el que comenzó hoy. Hoy entraron las tropas del señor Blanco las que son cosa de 600 a 700 hombres y seis piezas de artillería. En la noche hubo retreta con música en la casa del señor Degollado y concluyó el cuartel.

V.19. Hoy hubo jubileo en el Carmen por haberse empezado el triduo a María Santísima de Guadalupe.

S.20. Hoy hubo jubileo en el convento del Carmen. Salieron hoy para Dolores las tropas que entraron ayer.

D.21. Hoy hubo función en el Carmen, la que se hizo en honra a María Santísima de Guadalupe, habiendo dicho la misa el señor cura don Regino Téllez. Después de la misa quedo expuesto el Divinísimo. En la noche de hoy hubo retreta con música en la casa del señor Degollado.

L.22. Hoy se comenzó en el Convento del Carmen, un novenario a María Santísima de Guadalupe.

M.23. Hoy ha llegado a esta capital el señor don Guillermo Prieto. Se dice que Traconis mandó fusilar cerca de San Felipe a San Francisco Rosas (capitán del Primer Batallón que salió de aquí) por haberle agarrado unas cartas de los reaccionarios.

J.24. según dicen no es cierto el fusilamiento de Rosas. Llegó a esta capital el señor don Ignacio Ramírez. El señor licenciado don Manuel Doblado, salió para Zacatecas a donde va a ponerse a la cabeza de las tropas que se levantaron en Guanajuato por el señor Verduzco. Oradores, han sido nombrados por la junta patriótica para el 16 de Setiembre el señor licenciado don Susano Quevedo y para el 27 el licenciado don Francisco Macías. Según publican en el "Liberal" en México se ha publicado una excomunión contra los liberales con motivo de la ley de nacionalización de los bienes del clero. En la noche de hoy hubo función de maroma y Teatro en la plaza de gallos y de circo en el Mesón de la Sirena. En la misma noche hubo retreta con música en la casa del señor Degollado.

D.28. Hoy en la mañana hubo misa de tropa en el Santuario en la tarde hubo función de toros y por la noche maromas en la Plaza de Gallos. Se ha dado un decreto para que la contribución del tres por 1000 se pague adelantada por todo el año de 1860. Hoy murió don Benito Guzmán en el Armadillo.

L.29. Hoy han empezado a tumbar la tapia del Cementerio de señor Francisco. Nombramientos acordados para juntas subalternas en los puntos que se designan. Se mudó don Santos Degollado al Obispado. Cedral: presidente don José María Gallegos; secretario, don Antonio Degollado; vocales, don Doroteo Merla, don Cipriano Tapia; suplentes, don Paulino Covarrubias, don Apolonio Camarillo. Ciudad del Maíz: presidente, Br. don Bonifacio Cabrera, secretario; don Juan Barragán, vocales; don Lino Ortiz, don Francisco Castro, suplentes; don Antonio Bustos, don Antonio Bustamante. Bocas: presidente; don Santiago Covarrubias, secretario; don Cenavio Zarzosas, vocales; don Eleuterio Oviedo, don Cecilio Zavala, suplentes; don Valerio Moreno, don Victoriano Chavira. Salinas: presidente; don Mónico Romero y Carrera, secretario; don Guillermo Olivares, vocales; don Francisco López, don Antonio Gordoa, Suplentes; don Francisco Amaya, don José María Báez. Hoy comenzó un triduo en Catedral, en honor de señor San Miguel.

Mes.31. Hoy se la publicado un parte que da don Manuel Doblado sobre la ocupación de Lagos de Moreno, también se publicaron unas comunicaciones que se le interceptaron a los reaccionarios en las que da parte el general Vélez al señor Calvo de que con 2000 hombres puede, emprender la campaña hasta el Bravo. Se comenzó el novenario en la villa de Tequisquiapan.

Setiembre

J.1. Hoy hubo jubileo en el Carmen. En la noche de hoy hubo función de maroma en la Plaza de Gallos. Se sabe que a don Francisco Estrada que fue de aquí a San Miguel a ver a don José María Flores para un negocio del señor Gallardo, como llevó cartas de recomendación del señor Escobedo para presentarlas a los jefes del ejército general que haya en el tránsito, dicho señor Estrada cuando llego a San Miguel creyó que en dicho punto había fuerzas federales y presento sus cartas; luego que las vio el jefe de las tropas que ahí estaban; lo mando preso a pie para Querétaro, más pronto salió libre. Hoy en la noche cosa de las doce se apareció en el ciclo la Aurora boreal, muchos del pueblo y particularmente los serenos, ignorantes de lo que era empezaron a tocar las puertas de los vecinos y decirles que se estaba quemando el cielo y otras mujeres gritaban en la calle por el mismo estilo en Tequisquiapan, Tlaxcala y Santiago tocaron primero a fuego y luego rogativa, todos los que estaban en los juegos de Tequisquiapan dicen empezaron luego a rezar y pedir perdón. La Aurora duró hasta cosa de las cinco de la mañana. Se dice que las fuerzas que estaban al mando del señor Doblado han sido derrotadas.

D.4. Hoy en la mañana hubo revista comisaria en el Santuario, habiendo ido toda la infantería y artillería. En la noche hubo función de maroma en la Plaza de Gallos. Retreta en la casa del señor Degollada, y hubo también en el teatro primera función dada por una compañía recién venida de Guanajuato. Ha llegado aquí el señor Torices.

L.5. Hoy con motivo de haberse agarrado a un mozo que traía varias cartas para varios sujetos de San Luis, entre otras venía una de don Cástulo Camacho que le escribía al dueño de la panadería del retiro; dicha carta la han impreso y en ella dice que pronto se verán pues han salido ya fuerzas de México, también manda un parte de Woll. en el que habla de la acción con Doblado.

M.6. Hoy llegó el señor don Francisco Estrada. En este día salieron para México los señores don Manuel Alonso y don Tomás Revilla. Don Guillermo Osollo, hermano del general don Luis, se ha presentado al servicio de las armas en las tropas federales y se le ha dado el mismo cargo que tenia de coronel, según se dice dicho señor se fugó de las filas reaccionarías por haber jugado el dinero de la caja del cuerpo.

Mes.7. Hoy se casó el señor don Jesús Vargas con la señora doña Guadalupe Rocha. En la tarde hubo vísperas en Tequisquiapan y por la noche maitines. Hoy llegó Manuel Martínez.

J.8. Hoy en la mañana hubo función de Iglesia en la Villa de Tequisquiapan. En la tarde de hoy murió una señora parienta de las Arriaga. En la noche hubo función de Teatro, representando "El soldado de la independencia".

V.9. Hoy en la tarde se llevaron en procesión a María Santísima de Guadalupe de Desierto, del Carmen para la villa de Tequisquiapan.

D.11. Hoy en la tarde hubo función de circo y por la noche teatro. Se ha dado una ley para que todos los camposantos y cementerios y bóvedas mortuorias pertenezcan al gobierno prohibiendo también el enterrarse en las iglesias. Llegó de México la familia del señor Montante.

L.12. Hoy hubo jubileo en el Santuario. Hoy en la mañana entraron 200 hombres de infantería y 300 de caballería con dos piezas de campaña cuya fuerza es la que se estaba aguardando de Tamaulipas. Hoy dio un decreto el señor general don Santos Degollado en el que destituye del gobierno al señor don Santiago Vidaurri, también dio una proclama. Hoy en la noche hubo retreta con música. Se dice que en México había un pronunciamiento mas no se sabe si proclamando presiden a Márquez (que es más probable) o por la constitución de 57. En Monterrey también se asegura que Zayas se pronunció desconociendo a Vidaurri y a dicho señor es al que se le ha encargado el gobierno.

Mes.14. Hoy en la tarde salió el convite del novenario de Nuestra Señora de la Merced. En la misma tarde salió el bando para publicar el programa de las festividades cívicas de los días, 15, 16, 17, 27, y 28, del presente mes; las que están puestas del modo siguiente: el 15 habrá un repique a vuelo, a las 11 de la noche y la música tocará en la plaza de armas de 11 a 12 de la noche. El 16 a las cinco de la mañana habrá repique a vuelo salvas y dianas. A las ocho de la mañana, saldrán de palacio para la iglesia del Carmen todas las autoridades donde habrá una misa de gracias y dirá la oración religiosa el presbítero don Mariano Saldaña. A las cuatro de la tarde y lo mismo que por la mañana saldrán las autoridades de palacio para la fuente inmediata del Santuario donde pronunciará un discurso el licenciado don Susano Quevedo. En la noche habrá serenata en la plaza y los fuegos se prenderán a las 11. El 17 a las ocho de la mañana se reunirán las autoridades para ir al Carmen en donde se celebrarán las honras fúnebres de las víctimas de la patria. Hoy habrá Te Deum en el Carmen, y en la tarde en la fuente inmediata del Santuario pronunciará un discurso el licenciado don Francisco Macías. El 28 habrá honras fúnebres en el Carmen la oración la pronunciará el presbítero don José María Sánchez Gutiérrez.

J.15. Hoy se comenzó el novenario a María Santísima de la Merced. En la tarde de hoy hubo función de Circo en la Plaza de Toros. En la noche hubo iluminación en Palacio y toda la plaza. La música empezó a tocar desde las ocho, la que se puso junto a la pila que está en el centro. A las 11 de la noche hubo repiques á vuelo en todas las iglesias, y tiraron algunos cohetes. En la plaza el señor Prieto arengó al pueblo también los señores don Mariano A. Villalobos y don Francisco Vega dijeron unas poesías.

V.16. Hoy en la mañana salió de palacio el gobernador acompaña do del señor prefecto el ayuntamiento y demás autoridades, para el Carmen en donde hubo una misa, entre la misa pronuncio un sermón el presbítero don Mariano Saldaña. Entre la misa la tropa que estaba formada afuera hizo tres descargas como de costumbre. A las seis de la mañana y a las 12 hubo salvas de Artillería. En la tarde lo mismo que por la mañana salió la comitiva de Palacio para la última fuente del Santuario habiendo marchado detrás (de) la tropa y tres piezas de artillería. Luego que llegaron a la fuente la tropa de infantería se formó al otro lado de la casa de don Mariano Martínez, habiéndose quedado las piezas de artillería en el llano. tan luego como la comitiva tomo asiento el licenciado pronunció un discurso y la infantería hizo una descarga. Luego que concluyó el discurso y cosa de las seis de la tarde empezó la salva de artillería. Concluido esto se volvió la comitiva para palacio donde se disolvió. En la primera fuente del santuario inclinados hacia la garita, o mejor dicho frente de la garita hubo maromas. En la noche hubo iluminación en la plaza, la música comenzó cosa de las ocho y vinieron los bailes de las villas.

S.17. Hoy en la mañana hubo honras fúnebres en el Carmen habiendo asistido todas las autoridades. Concluidas las honras el presbítero don Mariano Saldaña dijo un sermón. En este día desde las seis de la mañana hasta las ocho de la noche hubo un cañonazo cada media hora. En la tarde, cerca de las cuatro hubo un repique general que duro hasta las cinco dadas, también, salieron dianas tocando por las calles y música. Todo fue, por haber recibido noticia de que Márquez había sido derrotado en Atenquique por las fuerzas de Coronado. También se han impreso los partes de dicha acción (los que no son oficiales sino solamente cartas particulares) en los que también da la lista los que fueron agarrados prisioneros y cosa de 40 colgados. En la noche hubo un gallo el que comenzó a tocar en la casa del señor Degollado en dicho gallo sacaron una marmota, la que tenía pintado un gallo con un laurel en la cabeza que representaba a Coronado y a un mono con sombrero montado y un puñal en la mano (que representaba a Márquez) dicho mono estaba tirado a los pies del gallo. En esta misma noche a la oración salió el convite de los toros llevando oraciones y cosa de las ocho empezó la función de toros en la plaza de toros del Montecillo. En la villa del Montecillo hubo maitines.

D.18. Hoy en la mañana hubo función de iglesia en la villa del Montecillo y por la tarde hubo Corpus. En la noche hubo función de Teatro dedicada al pueblo potosino representando el drama en cinco actos, titulada "Amor, ambición y muerte o Clotilde de Valery". El teatro se iluminó interior y exteriormente y la música comenzó a tocar afuera desde la media para las ocho hasta que se comenzó la función.

L.19. Hoy se mudaron para la plazuela de la Merced, los juegos que había en el Montecillo.

M.20. Hoy se mudaron para San Agustín los soldados que había en el Carmen. Hoy salió tropa para San Felipe.

Mes.21. Hoy llegó de Santa María del Río, Paz con su familia.

J.22. Hoy en la tarde trajeron en procesión a María Santísima de Guadalupe del Desierto, de la Villa de Tequisquiapan para el Carmen. En la noche hubo función de Teatro. Desde ayer en la noche se puso en una casa cerca de la Merced el juego de la Ruleta. Ayer salió de aquí la artillería y el 2° Batallón de San Luis. Hoy llegó García Diego.

V.23. Hoy en la noche hubo benedicta en la Merced.

S.24. Hoy en la mañana hubo función de iglesia en el convento de la Merced. En la tarde salió en procesión la Santísima Virgen habiendo ido alumbrando muchas señoras.

D.25. Hoy se comenzó en San Franco el novenario al Santo Patrón habiendo salido ayer el convite. En la tarde de hoy hubo función de toros, y en la noche Teatro representando la pieza titulada "La flor de un día". Hoy salió para San Felipe el señor don Santos Degollado. Hoy ha sido la inauguración de la escuela de las Recogidas habiendo habido discursos y poesías.

L.26. Hoy se han mudado para la plazuela que está por la puerta del campo del convento de San Francisco, los juegos de loterías chusas, que había en la plazuela de la Merced. Hoy llegó de México don Manuel Alonzo.

M.28. Hoy hubo salva de artillería a las seis de la mañana. Cosa de las nueve, se reunieron en Palacio las autoridades, habiéndose formado la tropa al frente del mismo palacio. Luego salió la comitiva para el Carmen en donde se cantó un solemne Te Deum. A las doce del día hubo salva y a las cinco de la tarde salió la comitiva de palacio, para el Santuario. Luego que llegó la comitiva a la última fuente del Santuario tomaron asiento y el señor licenciado don Francisco Macías dijo un discurso. Al principiar el discurso hubo una descarga hecha por el Batallón de Tamaulipas y luego que concluyó hubo salva de artillería y repique en el Santuario. A más de la música que llevaba la tropa que marchó detrás de la comitiva había música en la primera fuente del Santuario la que estuvo tocando toda la tarde. Cosa de las seis y media se vino la comitiva del Santuario para palacio donde se disolvió. En el día estuvo el comercio cerrado hubo cortinas en las ventanas y balcones y al salir y volver la comitiva hubo repiques. En la noche hubo iluminación en la plaza de armas y serenata, también en la misma plaza habían juegos de boliche, lotería, y fuegos los que se prendieron cosa de las 11 y media. En las más de las casas particulares había faroles los que se pusieron por temor de una multa. El juego de la ruleta que estaba por la Merced. Hoy se mudó a los hijos de don José María Flores, también en una casa cerca de la zapatería de Sandoval ha puesto el señor don Silverio Vélez una lotería imperial que es casi igual a la ruleta de Aguer, nada más, que en esta solo se saca el número de un globo. Hoy en la noche llegó el señor general don Santos Degollado. A Torices que llegó días pasados lo han nombrado médico de tropa.

Mes.28. Hoy en la mañana hubo honras fúnebres por el señor don Agustín Iturbide habiendo asistido todas las autoridades, concluidas las honras, dijo su oración el presbítero don F. María Sánchez Gutiérrez. Hoy cosa de las dos de la tarde salió para Rioverde la tropa del Batallón de Tamaulipas por saberse que dicha plaza está en poder de los reaccionarios. Durante el día de hoy ha habido cortinas en muchas casas y por la noche hubo iluminación en Palacio. Llegó de Querétaro don Esteban Terán.

J.29. Hoy se comenzó un triduo a María Santísima de Guadalupe en el Carmen. Hoy llegó el general Traconis. Hoy en la mañana fusilaron a uno que agarraron por ladrón.

V.30. Hoy se dice que una avanzada de Woll se pasó a las tropas de Doblado el que otra vez está en León. También se dice que han prendido a Vidaurri y dicho parte lo da Aramberri como encargado del Gobierno.

Octubre

S.1. Hoy se concluyó en el Carmen el triduo que se le hizo a María Santísima de Guadalupe habiéndose quedado el día de hoy su majestad patente. Hoy han salido a pedir para la función de San Francisco el presbítero don Mariano Saldaña y don Pascual García. Hoy en la noche pusieron música en la ruleta de Vélez.

D.2. Hoy en la noche hubo función de Teatro. La función de toros, que debía haber habido hoy en la tarde no la hubo a consecuencia de la lluvia.

L.3. Hoy en la tarde hubo vísperas en el convento de San Francisco, y por la noche hubo maitines. Se ha publicado una ley para que en lo de adelante solo sean días de fiesta, para que no se pueda despachar en los tribunales y el comercio se cierre los días siguientes: los domingos, el Jueves de Corpus, el jueves y viernes de la semana mayor, el 1° y 2 de noviembre, el 16 de Setiembre y el 12 y 24 de diciembre. También se ha publicado un decreto para dispensar a Pablo Verástegui de un año de pasante para que pueda recibirse de abogado. Otro para que no se pueda presentar ninguno ni podrá hacer ninguna demanda sino esta apuntado en el servicio de Guardia Nacional, o este exceptuado. En el "Liberal" periódico del gobierno se ha publicado un discurso que se dijo en el teatro el 16 de setiembre. Se ha encargado de la Administración de correos el señor don Rafa Lorenzo Vega y de la Vacuna el señor don Ambrosio Salazar. Se ha puesto un aviso para que en lo de adelante no circulen los tlacos amarillos, esto es los zacatecanos.

M.4. Hoy hubo una buena función de iglesia en el convento de San Francisco habiendo quedado todo el día su majestad patente. Se mudó Paz a una casa en la plazuela de la compañía.

Mes.5. Hoy en la noche han seguido las ruletas, aunque los otros juegos de Loterías, carcamanes, etc. Ya se han quitado. Han llegado de fuera la familia de Rojas y la de López Hermosa.

J.6. Hoy han puesto en la plazuela de San Francisco una columna, la que según dicen es para un farol. Hoy se mudaron los juegos de loterías, chusas, etc., a la plazuela de San Miguelito. La ruleta de Vélez ya se quitó.

V.7. Hoy en la noche se fue el licenciado Quevedo. La ruleta de Aguer ya se quitó.

D.9. Hoy en la tarde hubo función de toros y por la noche teatro y habiendo representado la pieza titulada. “Fortuna te de Dios hijo que el saber poco te importa".

L.10. Hoy ha abierto don Antonio Cuesta una nueva tienda de ropa en los bajos de don Pedro San Juan, con el nombre de; "La Bomba". El sábado ocho se casó el señor Parra con la señorita Zavala (la más chica). En la noche de hoy hubo retreta.

Mes.12. Hoy a las cuatro de la mañana salió de aquí el señor don Santos Degollado el que según dicen fue hasta el Valle pues llegó cosa de las seis de la tarde. Hoy hubo jubileo en el Santuario.

J.13. Hoy en la noche hubo función de teatro.

S.15. Hoy a la madrugada hubo repiques, por ser la víspera del día de la función de San Miguelito. En la mañana hubo función en el Carmen en honor de La Santísima Virgen Santa Teresa de Jesús. En la tarde hubo vísperas en la Iglesia de la Villa de San Miguelito y por la noche maitines. En la misma noche de hoy, hubo retreta con música en la casa del señor Degollado. Murió un Corista de la orden de Franciscanos el que estaba escondido en una casa curándose, y habiendo sabido él; que el gobierno había tenido aviso, de que estaba escondido, se asustó y se agravó. Cuando murió, el R.P.F. Mariano Arias pidió permiso al gobierno para que se enterrara en el Convento y se le concedió. Se dice también que otro padre Franciscano estaba escondido en otra casa; y habiéndole dado parte al gobierno mandaron catear la casa para ver si lo encontraban, más como él ya tenía aviso de la denuncia, se marchó; no habiendo encontrado los cateadores en la casa, más de dos baúles pertenecientes a dicho padre. A la dueña de la casa la llevaron a las Arrecogidas, más como no se encontró nada ni ningún papel que hablara de política se puso en libertad. Hoy en la noche presaron a Francisco García (hijo de don Pascual) al que se llevaron por no haber encontrado en la casa a don Pascual. La prisión es porque como don Pascual en compañía de otros quedaron de fiadores de la persona del señor cura don Jesús Gordoa, habiéndose ido dicho señor tienen que responder por él, los fiadores.

D.16. Hoy en la mañana apresaron a don Luis Rodríguez a Gordoa (el hermano del cura don Jesús) y a Vélez por haber sido fiadores del presbítero don Jesús Gordoa. En la mañana de hoy hubo función de iglesia en la Villa de San Miguelito, y por la tarde hubo procesión de Corpus. En la noche de hoy hubo función de Teatro. En la tarde de hoy salió libre el señor Gordoa y también el hijo de don Pascual García.

L.17. Hoy en la mañana se llevaron presos fuera de San Luis a don Luis Rodríguez y a don Silverio Vélez. En la mañana cosa de las diez, llegó la tropa que días pasados había salido para Rioverde. Hoy se han quitado ya los puestos de juegos y ruletas que había en San Miguelito. Salió el señor Cruz Aedo para Durango a donde va de Gobernador.

M.18. Hoy han empezado a poner en la Plazuela de San Juan de Dios, los puestos para los juegos de loterías, chuzas, etc., que estaban en San Miguelito. Cuatro oficiales de los del Gobierno se han pasado a los Constitucionalistas, según dicen entre ellos se pasó un tal Bonilla oficial del 2° de Infantería.

Mes.19. Hoy han llegado varios de los oficiales que estaban en San Felipe. Hoy han empezado ahondar en medio de la plazuela del Carmen, en donde van a poner una pila, viéndole el agua de la Alberca.

J.20. Hoy en la tarde salió fuera la caballería de los Tamaulipecos. En la noche hubo función de Teatro.

V.21. Hoy han empezado los juegos en la Plazuela de San Juan de Dios, estando las Ruletas una, en la casa de las señoras Terán y otra, en la casa de don Ignacio Gómez.

S.22. Hoy en la noche parió la señora Lambarri, esposa del señor Muriel. Hoy hubo junta de médicos para tratar sobre la curación del señor licenciado don Francisco Villanueva. Dicha junta según dicen fue movida porque el doctor Torices dijo al señor general don Santos Degollado que estaba mal curado. Se sacramentó hoy doña Ramona Salazar.

D.23. Hoy en la mañana marcharon con música los dos cuerpos de infantería que hay aquí habiendo ido a misa al Santuario. En la noche de hoy hubo función de Teatro. Se ha publicado un reglamento de tiempo de don José María Otahegui para el Hospital de Pobres de San Juan de Dios. Hoy se ha repartido un prospecto de un nuevo periódico que se va a imprimir en imprenta de Dávalos; titulado: "Anales de instrucción primaría, cuyo periódico no ha de tratar nada de política sino tan solo de materias propias para la instrucción primaría. Hoy en la noche entre el Gobernador de Zacatecas.

L.24. Hoy en la mañana hubo una misa cantada solemne, en el Carmen en honor de San Rafael habiéndose comenzado hoy su octavario. Hoy murió el señor don Antonio Rodríguez. Hoy en la noche presaron a don Juan Ferniza y a los señores don Eusebio y don Ceferino Puente, a los que sacaron de la casa donde está el juego de la Ruleta. Según dicen por haber estado brindando en contra del actual gobierno. Hoy llegó de Peotillos mi tío don Mariano.

M.25. Hoy se han puesto en la pirámide que pusieron en la Plazuela de San Francisco un gran farol. Hoy han pasado por caja a los señores Puentes y Ferniza habiéndolos puesto en el cuerpo que está en el seminario, en la mañana pusieron presos a Zavala y Cortés, pero estos luego salieron. Hoy en la tarde bautizó el señor don Ramón Larrache y Da Angela Lambarri al niño del señor Muriel.

Mes.26. Hoy se han empezado a rayar el lugar donde han de ponerse los puestos en la Plaza de Armas. En la tarde de hoy salió fuera un piquete de caballería. Hoy han publicado un parte que el señor general Blanco da sobre una derrota que sufrieron los reaccionarios que mandaba el señor don Felipe Villanueva, la que tuvo en lugar en Chamacuero.

V.28. Hoy en la mañana hubo repiques en todas las iglesias por un cuyo repique fue por haberse recibido unas cartas en las que decían que tres cuerpos de los que el general Márquez tenía en Guadalajara se habían pronunciado a tiempo que el señor Ogazón se acercaba a aquella plaza.

S.29. Hoy en la tarde hubo vísperas en el Convento del Carmen y en la noche Maitines.

D.30. Hoy en la mañana hubo función en el Carmen la que fue en honor de San Rafael. En la tarde hubo función de toros y circo en la plaza de toros.

L.31. Hoy se han abierto en la plaza los puestos de dulce y fruta que anualmente se ponen.

Noviembre

M.1. Hoy por ser día del cumpleaños del excelentísimo señor general don Santos Degollado se puso un aviso para que se pusieran cortinas, en las ventanas y balcones y en la noche se iluminara; cuyo aviso fue poco cumplida pues muy pocas personas la obedecieron. En la noche se mudó la ruleta de Aguer a la casa de don José María Flores. Llegó de Querétaro la señora doña Pepa Portillo.

Mes.2. Hoy por ser día de finados mucha gente ha ido a rezar a los camposantos. En la noche han seguido los puestos de dulce. Muchos puestos de los de loterías que estaban en la plazuela de San Juan de Dios los han quitado.

J.3. Hoy cosa de las doce hubo un repique general el que fue según el parte que se imprimió la noticia de que el señor Gómez Farías entró ha Guanajuato, también porque cerca de dicho punto tuvieron un encuentro las tropas del señor Doblado con parte de las de Vélez y resultaron estas derrotadas. Se han puesto unos avisos en los que son Joaquín Sander como albacea de los bienes del relojero don Domingo Rosa pone en conocimiento que los señores que tengan relojes hayan tenido relojes en dicha relojería se encuentran actualmente en la relojería de papa quien los entregará a los que los reclamen dando las señas correspondientes. En el periódico “El liberal” hacen una crítica de una señora que insulto a un liberal, nomás por haber pasado delante de su persona las por las señas que da y por lo que por varios dicen parece que es la señora doña D. Estrada.

V.4. Hoy en la noche cosa de las siete hubo un repique general en todas las iglesias, el que fue por hacerse recibido parte oficial que el señor Doblado da de la acción que en las Animas dio a una parte de las fuerzas que manda Vélez y cuya parte iba al mando de Alfaro. En dicho parte también dice que agarraron, prisionero al ex-general Arteaga. Los comerciantes de Guanajuato y algunos de los empleados, se salieron con la tropa de dicho punto para que al ocupar aquella plaza las tropas constitucionalistas no les impusieran préstamo, más en el camino, como por todas partes estaba rodeado, les salieron las tropas de Blanco y les quitaron sus equipajes habiendo habido cosa de 60 muertos (entre los que iban). En la noche de hoy poco después de los repiques salieron varios gallos gritando ¡Vivas! y ¡Mueras!. Se sabe positivamente que el general Woll entró a Zacatecas de cuyo punto se creé marchará para acá. A Vélez se dice que lo tienen rodeado las tropas constitucionales y que muy pronto se sabrá el resultado. Hoy hubo revista general en el Santuario, habiendo estrenado hoy el cuerpo que poco a se empezó a parar, vestidos de paño y chacos. Hace pocos días se fue para México don Antonio Cuesta.

S.5. Hoy se ha publicado en el "Boletín del Ejército Federal" una ley que dicen dio Márquez para que cuando al ocupar una plaza se encuentren las casas cerradas se abran y puedan vivir en ellas oficiales.

D.6. Hoy se ha publicado un parte que el señor Labarra da sobre la acción que tuvo con las fuerzas reaccionarias que mandaba el general Pacheco, y cuya acción tuvo lugar en la hacienda de Cieneguita como dos millas distantes de San Miguel. El triunfo quedo por parte del señor Labarra y dice que agarraron cosa de cien prisioneros. Hoy salió fuera de San Luis el señor don Santos Degollado, habiendo dejado al señor Prieto con amplias facultades. En la noche de hoy hubo función de Teatro. Hoy fue el examen de la escuela número 2° que dirige el señor don José María García. Ha renunciado la señora doña Margarita Guerrero la escuela número 4°.

L.7. Hoy se ha publicado en el periódico "El liberal" una comunicación que el secretario del gobierno dirige al señor don Santiago Ramos recaudador de contribuciones directas, sobre los que debiendo a dicha oficina y cuyos señores no están aquí, se vendan para su pago los muebles que se hallen en seis casas. Se sabe que a Vélez y Pacheco los han llamado de México para hacerles cargos que han obedecido dicha orden; habiendo mandado reunir todas las tropas, a Querétaro. Quedando al mando a Mejía.

Mes.9. Hoy se murió Juan del Jarro (conocido por este nombre) Muchas personas han contribuido para que si le haga un decente entierro. Lo han (traído) llevado a San Juan de Dios donde estará depositado hasta mañana que será cuando deba enterrarse. En todas las iglesias han doblado, hoy a las doce a la oración y a las ocho. Se dice que Miramón debe haber llegado hoy a Querétaro habiendo quedado Zuluaga de presidente.

J.10. Hoy hubo en el Carmen, misa de difunto con cuerpo presente (el de Juan del Jarro) habiendo, estado la iglesia muy iluminada, y habiendo habido muy buena música. Durante la misa se celebraba hubo dobles en todas las iglesias. y concluida que fue esta lo condujeron al camposanto donde se sepultó en una bóveda que se le mandó hacer. En el convento de San Francisco han empezado a hacer un caño por el agua que ha de ir a una fuente nueva que va a poner en la nueva plazuela. En la noche de hoy por haberse acabado de componer una de las mesas del billar de la sociedad del comercio; hubo música. Hoy ha abierto una nueva sastrería la que es de don Antonio Beltrán

V.11. Hoy en la noche hubo retreta con música la que estuvo tocando en la casa donde vive el señor Degollado y después fue para el cuartel. Es administrador de correos es el señor don Andrés Vargas.

S.12. Hoy hubo jubileo en el Santuario. En la tarde hubo revista con música, la que pasó el cuerpo que está en San Agustín. Hoy han convidado para el examen de la escuela de niñas que dirige la señora doña Merced Arriaga. También en este día se ha impreso un papel con el título de "Juan del Jarro" el que habla tan solamente de él, y refiere el modo como se presentaba al público y de todas las otras cualidades que se contenían en el describiendo por último su (muerte) entierro. En "El liberal" publican unos versos los que tienen por objeto ridiculizar la coronación que en Aguascalientes le hicieron al General Woll.

D.13. Hoy en la tarde hubo función de circo, y por la noche hubo función de teatro. En dicha función concurrieron muy pocos españoles lo que fue por el motivo de que, en la función del jueves pasado; unos que estaban en la galería algo ebrios empezaron a gritar y los de la cazuela también empezaron, a hacer farsa. Después, habiendo tenido aviso de esto el gobierno, insertaron en "El Liberal" un articulillo en contra de los españoles mencionados. Hoy hubo jubileo en el Carmen el que fue en honor de una función que se le hizo a María Santísima de Guadalupe. Hoy hubo escriban en la escuela.

L.14. Hoy en la noche entró la tropa que está a las órdenes del señor don Juan José Garza el que llegó desde en la mañana y fue alojado en la casa del señor don Francisco J. Estrada. El número de fuerzas que entró en la noche fue 350 hombres, entre los de caballería, infantería y artillería, con seis piezas de artillería y 10 carros. Hoy llegaron los señores don Silverio Vélez y don Luis Rodríguez quienes fueron vueltos de su destierro por el gobierno. Hace como seis o siete días que han abierto la calle que divide la Huerta del Carmen del Convento.

M.15. Hoy llegó el señor general Uraga.

Mes.16. Hoy se dice por varias personas que las tropas que estaban en Querétaro al mando del señor general Miramón han derrotado completamente a las fuerzas que mandaban Doblado, Blanco y otros jefes. También se dice que Blanco con todo su estado mayor cayó prisionero. El señor general don Santos Degollado se dice, que llegará mañana. Muchos desertores (prisioneros) han estado entrando hoy. En la tarde hoy sacaron para la calle las piezas de artillería que estaban en el cuartel. En la noche de hoy han andado agarrando mucha gente para soldados. Hoy han presado a don Joaquín Zamora y al señor Lacavex, tan sólo porque estaban hablando sobre la derrota que se les había hecho a los federales.

J.17. Hoy se ha sabido positivamente la derrota de las fuerzas que mandaba Degollado. En todo el día de hoy y en la noche han andado agarrando gente para soldados. En la tarde de hoy cosa de las cuatro llegó el señor Degollado con un estado mayor salieron libres Zamora y Lacavex.

V.18. Hoy han seguido agarrando mucha gente.

S.19. Hoy se ha convidado para el examen de la escuela número 3° que dirige el profesor don Mucio Gama, habiendo convidado el señor don Juan Bustamante que es el padrino de dicho acto. El señor general Miramón según se dice después de la acción se volvió para México. Se han repetido unos avisos de un nuevo molino de chocolate, el empresario de dicho molino es el señor don Marcos Planchu. La fuente que se ha hecho nueva en la plazuela del Carmen ya está concluida. En la tarde de hoy hubo revista con música en el convento de San Agustín. En la tarde de hoy han entrado muchos de los dispersos que se han juntado, el número de los que entraron juntos fuera de otros que en poquitos han entrado, son 30 hombres. También en el Jaral se sabe que está reuniendo dispersos y que tiene como 1000 hombres. En Celaya a unos cuantos que se estaban reuniendo, el pueblo se sublevó en su contra y los hicieron correr habiéndoles quitado dos piececitas de artillería que tenían. Se dice también que a Pueblita un padre que lo convidó a almorzar lo enveneno más como fue acudido a tiempo, se libertó habiendo quedado loco; esto pública el periódico "El Liberal” en una de sus columnas. Se ha dado un decreto para que se suba de alcabala un centavo en cada vara de manta, y medio más por cada cabeza de los que tienen ganados que matar.

D.20. Hoy en la mañana hubo en la casa donde vive el señor Garza una comida que dicho señor dio al señor don Santos Degollado, habiendo concurrido a ella el señor don Guadalupe García y otros muchos jefes; durante la comida estuvo tocando la música del batallón de dicho señor Garza y cuando hubo concluido, que salió el señor Degollado le tocaron el Himno Nacional. Cosa de las dos de la tarde entraron varios, cuerpos de caballería de los que se han juntado después de la acción, los más con armas; según parece fueron más de seiscientos hombres. Infantes muy pocos fueron los que entraron que son los únicos que pudieron recoger. En la tarde de hoy fue la bendición que, de la fuente de la plazuela del Carmen, habiendo colocado antes de la bendición un busto del general Arista, arriba de la columna, que está en medio de la pila. Al tiempo de la bendición hubo un repique en el Carmen y tiraron algunos camarasos. En la tarde de hoy hubo función de circo en la Plaza de Toros del Montecillo. En la noche hubo función de Teatro a beneficio del señor Luis la que fue dedicada al comercio. En el periódico el “Liberal” insertan un párrafo en contra de las señoras Gonzáles, por motivo de haber hablado mal del partido. En el mismo periódico ponen que el señor general Woll salió de Aguascalientes para Guadalajara en donde dicen se pronunció Márquez por Santa Ana. En el "Boletín del Ejército Federal" insertan el parte que da don Santos al ministro de la guerra de la acción que dio en cuya parte dice contribuyó para la pérdida el mal comportamiento de algunos de los oficiales.

L.21. Hoy han empezado a tumbar el cementerio del Convento de la Merced.

M.22. Hoy en la noche se han reunido varios jefes y oficiales para ver que se debía hacer en caso que los reaccionarios vengan a atacar la plaza y según parece han convenido en irse. Hoy en la noche se fue Paz para Tula. En la misma noche de hoy han sacado mucho parque.

Mes.23. Hoy en la mañana, salió toda la tropa de caballería infantería y artillería que estaba aquí; no habiendo dejado, más que doscientos hombres, al mando de don Juan Bustamante para resguardo de la población. El comercio ha estado cerrado durante el día. Muchos liberales si han ido. Los dependientes de las tiendas se han reunido para resguardo de la población y han salido en patrullas por las calles. En la mañana los presos de la cárcel hicieron empuje para salirse, gritando ¡Viva la libertad! más luego luego subieron varios a la azotea y habiéndoles dicho que si no se callaban, les hacían fuego se aquietaron; después de esto, como medida precautoria se pusieron un centinela en cada esquina de la calle de la cárcel, para no dejar pasar gente por ahí. Han nombrado gobernador al señor don Francisco Guzmán, el que al momento ha mandado llamar a don Genaro Dávalos para se encargue de la comida de presos, de la Alhóndiga, de la Aduana, y casa de matanzas, dicho señor ha reunido también a varios serenos para el alumbrado de en la noche. Don Jacobo Urtetegui en compañía de don Gaspar Linch son los que han ido de comisionados para decirle al jefe de las fuerzas que abrevie el paso por haber quedado la población sola. Hoy en la tarde entró la tropa que había salido ayer al mando del señor Yata, el que debe marchar en compañía de Bustamante. En la noche, han seguido las patrullas, de varios de los particulares y españoles. En la Cárcel y en Palacio hay guardia también.

J.24. Hoy han seguido las patrullas de varios particulares. A las cuatro de la mañana de hoy salió con sus doscientos hombres el señor don Juan Bustamante. Llegaron a las cuatro de la tarde los comisionados don Jacobo Urtetegui y Linch. En la noche a las ocho entró parte del escuadrón de don Florentino López, habiendo habido muchos, cohetes y repiques; y una porción de plebe gritando ¡Vivas! y ¡Mueras! tan luego como hubo entrado al momento se dividió en patrullas para resguardar la ciudad. Hoy se han seguido yendo muchos presos y aun sus familias también se han salido.

V.25 Hoy ha permanecido el comercio cerrado, y han seguido las patrullas de los comerciantes y paisanos. Las fuentes de algunas casas se han compuesto con cortinas. A las diez de la mañana hubo un repique general en todas las iglesias el que fue por haber empezado a entrar la tropa; mientras estuvo entrando hubo cohetes y en algunas les tiraron obleas. El jefe a cuyo mando viene la tropa y el que va a quedarse de gobernador es el señor don Manuel Díaz de la Vega. Cosa de la una de la tarde fue cuando relevaron a los particulares que estaban dando guardia en Palacio y la cárcel, habiéndoles dado las gracias el señor Vega. En la noche hubo retreta con música en la plaza habiendo ido muchas de las señoras principales de San Luis, después que concluyó la retreta sacaron un gallo. Han llegado muchos de los que habían desterrado lo mismo que religiosos.

S.26. Hoy dio su proclama el señor don Francisco de Sales Guzmán, en la que da las gracias a los señores que buenamente se prestaron a hacer sus servicios de guardias y patrullas; también dice que queda encargado del gobierno de este departamento el señor don Manuel Díaz de la Vega y encargado del mando político el señor don Pedro Díez Gutiérrez. Hoy han seguido llegando muchos señores de los que estaban fuera. Entre ellos han llegado el licenciado Sousa, don Octaviano Cabrera, y casi todos los padres franciscanos. Llegó de México el señor don Antonio Cuesta.

D.27. Hoy en la mañana marchó la tropa con música para ir a misa a la Iglesia de la Compañía. En la tarde hubo función de toros, y por la noche función de teatro. Hoy se fue para Guanajuato el señor don Severo del Castillo.

L.28. Hoy se han destinado ya varios empleados que estaban fuera, en sus mismos destinos que tenían antes. Se ha nombrado secretario de gobierno al señor don Pepe Castillo. En la tarde salió la tropa al Santuario para hacer ejercicio. Han llegado unos retratistas que sacan retratos al ambrotipo. Es vidrio papel y hule. En la noche hubo retreta en la plaza habiendo tocado dos músicas. Hoy han andado pidiendo en el comercio los padres franciscanos, para la función de la Purísima. Hoy dio su proclama el señor gobernador don Manuel Diaz de la Vega. Hoy se comenzó el novenario en San Francisco.

M.29. Hoy en la mañana se comenzó el novenario a María Santísima en el Convento de San Francisco. Hoy han denunciado a don Bonifacio Vargas y a don Jesús Rodríguez, al primero porque tenía armas escondidas, y al segundo porque tenía parque. Para ver si era cierto si valieron de una mujer que les fuera a comprar un fusil a la que se lo vendieron; al momento, se mandó poner preso a don Fortino (como dependiente mayor) y si le dijo que entregara las armas que tenía; para lo que se le dio de plazo, hasta la oración de la noche; para que, si durante este tiempo las entregaba se le pagarían, y si no, se catearía la casa se las quitarían y quedaría preso. A don Luis Rodríguez se le cateo la casa y se le encontraron dos cajones de parque habiéndosele impuesto una multa de $50 por cada cajón. Se dice que las tropas que salieron de aquí se han dividido en el camino.

Mes.30. Hoy en la mañana salió parte de la guerrilla de López. Se han publicado unos avisos para que todos los empleados de que estaban antes vuelvan para que los tomen otra vez. Se ha publicado un decreto también para que todos los que estén exceptuados del servicio de las armas den un fusil. En la tarde pasó revista con música el cuerpo del cuarto. En la noche hubo retreta con música en la Plaza de Armas, habiendo concurrido mucha gente. Han vuelto muchos federales de los que se habían ido. Al señor Villanueva dicen fue una comisión por el para traerlo, habiéndole llevado su salvo conducto.

Diciembre

J.1. Hoy hubo jubileo en el Convento del Carmen. La estatua del general Arista que colocaron en la columna que está en el centro de la pila de la plazuela del Carmen, la rompieron, pero se ha mandado componer. Hoy desde las diez de la mañana se adornaron los frentes de varias casas lo que fue por saberse que hoy llegaba el general don Francisco Vélez. A las tres de la tarde hubo un repique general el que anuncio la llegada de dicho señor general Vélez. Desde esta hora mucha gente comenzó a ir a encontrar la tropa. A las cinco de la tarde hubo otro repique general el que duró hasta cerca de las siete que fue la hora en que llegó la tropa. Luego que acabo de entrar y que ya había pasado por la casa de don Rafael Aguirre (que es donde está alojado el general Vélez) se dividió la tropa marchando cada cuerpo para su cuartel. En la noche hubo función de teatro a beneficio del gracioso de la compañía don Antonio Ruiz habiendo representado las comedias siguientes: "Lo que falta a mi mujer; Lo que sobra a mi mujer y a Mi mujer nada ni le sobra ni le falta". Como para anuncio de dicha función se imprimió un cuaderno en verso titulado "Calendario de don Procopio". En la misma noche al salir del Teatro salió un gallo echando ¡Vivas! y mueras por la calle. Se ha publicado un "Boletín extraordinario" en el que publican la derrota que sufrió el señor González Ortega cerca de Durango habiéndole quitado parque y artillería, la acción la dio el señor general Woll. Se dice que el general Miramón ha mandado preso para México al señor general don Leonardo Márquez. En la casa de Aguirre donde esta hospedado el general Vélez desde poco después que llegó se le puso guardia doble.

V.2. Hoy en la noche, hubo retreta con música en la plaza habiendo concurrido mucha gente. En la casa en que esta el general Vélez, estuvo tocando la música del batallón de cazadores, desde las ocho de la noche hasta la media para las diez, y después fue a tocar hasta las 10 y media al cuartel. En la plaza hubo dos músicas la de San Luis y la del cuarto. Se ha mudado la librería del señor don Mateo Rada para los bajos de la casa del señor don Andrés Barroeta.

S.3. Hoy se ha publicado un decreto para que todo el hombre que tenga de diez y ocho años para arriba se deba entregar un fusil a la prefectura o si no debe presentarse a tomar las armas en casa el que no dé ni una ni otra cosa, debe dar 10 pesos. En la tarde de hoy hubo revista con música en el cuartel de Cazadores.

D.4. Hoy han llegado otras familias de las que estaban fuera; entre ellas, la del señor don Juan Othón. En la mañana fueron todos los cuerpos, (cada cual con su música) a misa, la que se dijo en la plaza principal. Luego que concluyó la misa, todos los batallones se disolvieron yendo cada cual para su cuartel. En la tarde hubo función de circo y en la noche función de teatro. En la misma noche hubo retreta con música. Hoy llegó don José María González y su hijo. Ayer se comenzó el novenario en el Santuario.

L.5. Hoy han empezado a borrar de la columna que está en la pila de la Plaza de Armas los letreros que tenía. En la noche de hoy hubo retreta con música.

M.6. Hoy han seguido tumbando el cementerio de la Merced. En la noche de hoy hubo retreta con música en la plaza principal don Juan Álvarez Sagastegui ha puesto su establecimiento.

Mes.7. Hoy convidaron varias señoras. todas las de San Luis para que el día de mañana vayan alumbrando a María Santísima. Hoy hubo vísperas por la tarde en el Convento de San Francisco y por la noche maitines, habiendo estado la iglesia muy iluminada. En la plazuela de San Francisco, estuvo tocando la música de 4° batallón y en la Plaza de Armas, la música de aquí

J.8. Hoy en la mañana hubo función en el Convento de San Francisco habiendo quedado después de la misa expuesto su majestad lo mismo estuvo en Catedral. En la tarde cosa de las seis salió en procesión la imagen de la Purísima Concepción habiendo ido alumbrando todas las señoras. detrás de la procesión marcho la tropa del 4° batallón En la noche de hoy hubo función de teatro a beneficio de la primera actriz doña Lorenza Guerra y cuya función es dedicada al señor gobernador don Manuel Díaz de la Vega. Ayer se casó en el Convento del Carmen el señor general don Francisco Vélez con doña Carlota Cañizo habiendo sido, padrinos, los padres de la novia.

V.9. Hoy a la madrugada salió el general Vélez con la mayoría de la tropa que estaba aquí; según dicen fue para Zacatecas. Hoy se comenzó el octavario en el Convento de San Francisco.

S.10. Hoy han convidado para la función de María Santísima de Guadalupe. Hoy en la tarde hubo revista con música la que paso el cuerpo de Cazadores. En el libro que está arriba de la columna que está en la pila de la plaza principal han puesto en lugar de Constitución de 1857, han puesto Dios y Ley y en los huecos de abajo de la columna, donde decía Libertad, Igualdad, fraternidad y unión, dice; Libertad, Independencia y Unión. Hoy fue el capítulo de los Terceros de San Francisco. Hoy en la tarde ya hubo como era costumbre salve en el Convento de la Merced. Llegó hoy el R.P. prior de San Agustín F.J. Ma. María, también hace dos días llegó don Nicolás Mascorro.

D.11. Hoy en la tarde hubo función de toros, en la plaza del Montecillo. En la misma tarde hubo vísperas en el Santuario de Guadalupe habiendo cantado en dichas vísperas varias señoras. En la noche hubo maitines, habiendo estado muy iluminada la iglesia. En la calzada de árbol a árbol había mecates con faroles.

L.12. Hoy hubo función en el Santuario de Guadalupe, el sermón lo dijo el presbítero don Ambrosio Pereda. En la tarde de hoy estuvo muy concurrido el paseo de la calzada. En la noche hubo función de teatro. Llegó la fuerza que al mando de don Florentino López fue a Matehuala a traer dinero.

M.13. Hoy en la noche hubo retreta con música en la Plaza de Armas. Hubo una misa solemne en San Agustín en acción de gracias.

Mes.14. Hoy en la noche hubo rosario cantado en la Tercera Orden del Convento de San Francisco habiendo sido en honor a María Santísima. por ser el día de la "Noche Buena chiquita" y cuya función se hace anualmente. después de dicha función salió en procesión María Santísima. y San Francisco, llevando cargadas dichas imágenes, los hermanos y hermanas terceras. En la misma noche hubo retreta con música en la Plaza de Armas.

J.15. Hoy en la mañana hubo jubileo en el Colegio de Niñas. En la mañana hubo función a honor a la Purísima Concepción en la Tercera Orden del Convento de San Francisco habiendo predicado el R.P.F. Buenaventura Domínguez. Se ha impreso un cuaderno que el presbítero don Jesús Gordoa da con el título de “exposición pública que hace el Presbítero Jesús Gordoa cura propio de Ahualulco, en su personal defensa, la de los deberes, de su ministerio, y principios católicos (etcétera)" en cuyo cuaderno redacta todas las persecuciones que ha sufrido y el motivo de ellas. En la noche hubo función de teatro a beneficio de Antonio Flores y la que es dedicada a los señores Vicecónsules Ingles, Frances y Español, representando en dicha función la pieza titulada "Sublime rasgo de un hombre de bien o el reo de muerte", y de sainete la pieza titulada "Bárbaro y Silvestra" habiendo después de dicha comedia el baile ejecutado por la señora Guerra y el señor Acevedo.

V.16. Hoy hubo en el Convento de San Francisco una misa solemne, en acción de gracias, la que se ofreció a la Purísima. En la tarde anduvieron sacando cajones de parque, del Convento de San Agustín. En la misma tarde fue a ejercicio con música, el cuerpo de Lazadores. Salió hoy tropa de caballería e infantería. En la noche hubo, retreta con música en la Plaza de Armas. También en la misma noche hubo baile en la casa del señor don Francisco Duque. Hoy se comenzaron en Catedral las jornadas de la Santísima Virgen.

S.17. Hoy en la tarde pasaron revista al Cuerpo de Cazadores. En la misma tarde de hoy hubo salves en el Convento de San Agustín y la Merced, la que a más de ocho meses no la había a consecuencia de no haber estado aquí los religiosos de los expresados Conventos. Hoy han seguido mudando el parque de San Agustín. En "La Restauración" periódico del gobierno publican en la gacetilla que el Gobernador de Zacatecas (el constitucional) don Jesús Gonzáles Ortega se sacó la pila bautismal de dicho Estado la que es de plata con peso de 420 marcos. El general Lama que, en la ocupación de esta plaza, por los constitucionalistas el 30 de Junio del a junio pasado fue prisionero a Monterrey, se unió en la división Woll y vino a esta ciudad con la brigada del señor general Vega, hoy se encuentra desempeñando la secretaría de la Comandancia como estaba antes.

D.18. Hoy en la mañana fue la tropa con música a misa al Convento de la Merced y otro cuerpo al Convento de San Francisco. En la tarde hubo función de toros. En la noche hubo función de teatro. En el periódico "La restauración" insertan una comunicación (que los) la que está firmada por varios potosinos, y la que tiene por objeto el desmentir una comunicación que en la "Sociedad" (periódico de México) viene en la que varios potosinos de los que estaban en Santa María del Río, piden al supremo gobierno al general Alfaro para gobernador y comandante general de San Luis, y esto es lo que desmiente la citada comunicación, dando por el contrario, las gracias al supremo gobierno por el nombramiento que hizo en la persona del señor general don Manuel Díaz de la Vega. Han llegado a cosa de 200 blusas, por caballos, a la hacienda de Peotillos. También días pasados fueron a la hacienda de Bocas por reses. Se tomó el dicho de casamiento don José María Longinos del día, con una de las hermanas del señor Matilde Rojas. Hoy en la noche llegó el M.R.P.F. Ramón Carranco el que paró en la casa de don José María González.

L.19. El Cementerio del Convento de la Merced lo han acabado de tumbar. El Hospicio de Pobres se mudó de la Merced para donde primeramente estaba. El señor Facon que días pasados llegó de México con un buen surtido de sastrería, dio unos anuncios en los que inserta los efectos que ha traído. Es administrador de Correos el señor don Pedro Sámano. Hoy en la noche hubo retreta con música en la plaza.

M.20. Hoy ya empezaron a asistir a coro los canónigos. Se fueron para los Ranchos los Paz.

Mes.21. Hoy volvieron los Paz. Se han fijado unos avisos para (así) poner en conocimiento de todos, que se han permitido por el gobierno toda clase de juegos en la villa del Montecillo, los que deberían durar hasta el día de noche buena en cuyo día saldrán por la noche unos carros compuestos, representando varios pasos del nacimiento de Jesús. En la tarde salió el convite a la Villa del Montecillo para recoger la limosna.

J.22. Se ha publicado una proclama que el general Vélez dio a los zacatecanos el día 13 de diciembre del presente, en la que dice olvida todo lo pasado y los tiende una mano amiga a todos los habitantes de Zacatecas. Los retratistas que estaban en la casa que está frente del Convento de San Agustín, se fueron, habiéndose quedado con la cámara el señor Sidorré. En la noche hubo función de teatro. En la misma noche hubo retreta con música, la que estuvo tocando hasta las diez en la puerta del Correo, que es en donde vive el señor general don Manuel Díaz de la Vega. En la calle de la Concepción, frente de la panadería de las Damas se ha abierto una nueva peluquería francesas, y también unas modistas pusieron su oficina.

V.23. Hoy ha dado sus anuncios el nuevo retratista que está en la casa del frente del Convento de San Agustín. Es Prefecto el señor don Francisco de S. Guzmán.

S.24. Hoy en la mañana hubo jubileo en el Convento de la Merced. En la mañana hubo repliques en el Convento de San Francisco los que fueron por haber ido la comunidad a dar las pascuas a sus prelados. La comedia que estaba destinada para hoy no se representó por haber tenido poca entrada. En la noche hubo maitines en Catedral habiendo habido después la misa nombrada de gallo.

D.25. Hoy en la mañana fue la tropa a misa al convento del Carmen. Hoy fue el examen público de la escuela que dirige don Marcelino Vega. En la noche hubo baile en la casa del señor don Pedro Sámano. Como el señor Gutiérrez ya no tuvo que salir de San Luis ha vuelto a tomar la prefectura. En la noche de hoy salieron de la Villa del Montecillo los carros que anualmente salen representando varios pasos del nacimiento del señor habiendo dado vuelta por las calles de la estación. Hoy llegó el de don Miguel Laso.

L.26. Hoy en la noche hubo retreta con música en la Plaza de Armas. Se sabe que las tropas que van al mando del general Vélez están ya en Matehuala. Hoy murió la madre de don Nicanor Lobo.

M.27. Hoy en la mañana hubo función de iglesia en la villa de San Juanico. (Anoche hubo retreta con) En la noche de hoy se representó la pastorela que se había anunciado para el sábado. Se ha abierto nuevamente la tienda conocida por el nombre de "La Ciudad de Londres" la que se puso en la tienda que se hizo nuevamente cerca de la Botica de Guadalupe perteneciente al Colegio de Niñas.

Mes.28. Hoy se ha publicado en el periódico oficial, un decreto en el que se concede indulto a todos los desertores. También en el mismo periódico se inserta la siguiente lista de los señores que el señor gobernador ha nombrado para componer el ayuntamiento y es la que sigue: regidores perpetuos; 1° don Francisco de Sales Guzmán, 2° don Gregorio Sánchez, 3° don Ignacio Escalante, 4° don Fermín Sánchez, 5° don Guadalupe Othón, 6° don José María Facha, 7° don Agustín Gallardo, 8° don Francisco C. Cabrera, 9° don José María Coca. Síndico; licenciado don Rafael E. Sousa. Se sabe que el general Miramón ha pasado ya las barrancas de Atenquique y estaba frente a los de Beltrán donde parece le aguarda el enemigo. El señor general don Juan Vicario quitó al enemigo diez mil fusiles. Las tropas que estaban en Matehuala están al mando del general Echegaray.

J.29. Hoy se ha publicado el parte que el general Vélez ha de haber ocupado la plaza de Matehuala el 27 del presente.

V.30. Hoy en la tarde a las tres hubo un repique general en todas las iglesias salvas de Artillería y dianas lo que fue por haberse recibido el parte que el general Miramón ha de haber derrotado después de un reñido combate que dio lugar a tres acciones. Más en la última, fue donde derrotó completamente las fuerzas de Ogazón cuya derrota fue por las barrancas de Beltrán. Todavía después de las cinco de la tarde anduvieron tocando, varias calles las bandas de los cuerpos y música. En la noche hubo serenata en la Plaza de Armas. Hoy se acabó de componer el cuarto de la relojería de papá. Se ha publicado un aviso firmado por el secretario de la Comandancia don José Gutiérrez de Lama, para que todos los señores oficiales retirados e inválidos se presenten a la Comandancia para ser ocupados. También se publicó otro aviso que da don Buenaventura Carrillo para que satisfagan las contribuciones del tres al millar todas las personas que se van en el concepto de que si no pagas se hacen acreedores a pagar el seis un cuarto porciento de multa por solo el hecho de írseles a cobrar a sus casas.

S.31. Hoy hubo jubileo en el Carmen, para dar gracias por ser fin del año. También en Catedral estuvo su majestad patente y en la noche hubo rogativa en todas las iglesias antes de cubrir.

Fin del año de 1859.

y fin de este libro

Apunte copiado del Periódico oficial del gobierno de San Luis Potosí, sobre el número de fuerzas europeas, en el año de 1859.

Ejército europeo

Francia - Ejercito [efectivo el 1° de Junio del año de 1859 672, 100 hombres, 168 baterías de campaña. Marina. - 417 buques de guerra de los cuales 300 de vela, y 117 de vapor: 27,000 marinos.

Austria.- Ejercito - 670,477 hombres de los cuales 520,400 de Infantería, 70,000 de Caballería, 59,292 de Artillería, 11,116 ingenieros y estado mayor a 9,217 pontoneros. Marina - 104 buques de guerra.

Prusia. - Ejército - 525,000 hombres, de los cuales 410,000 Ejercito activo y de lanvoehr del primer ban, 115,000 de lanvoeho del Segúndo ban. Marina - 50 buques de guerra 3,500 marineros.

Inglaterra - Ejercito - 223,000 hombres, comprendidos los cuerpos diseminados en las colonias. Marina - 600 buques de los cuales 309 de vela 151 de vapor 40 navíos de línea con 17,291 cañones, y 69,500 marineros.

Rusia - Ejército - 1067,600 hombres comprendida la reserva, mas 226,000 irregulares. Marina - 117 buques, 3,800 marineros y artilleros.

Turquía - Ejército - 178,000 hombres, reserva, 148,680: tropas irregulares, 61,000 contingentes diversos. 110,000. Marina - 70 buques 3,800 marineros y artilleros.

España - Ejército - 75,000 hombres ejército de paz milicia 500, 600. Marina - 110 buques 15,000 marineros.

Cerdeña - ejército - 50,600 hombres. Marina - 40 buques 2,860 marineros.

Dos Sicilias - Ejercito - 100,000 hombres de los cuales 10,000 Suizos. Marina - 60 buques, de los cuales 32 de vela, y 28 de vapor 100 cañoneras. 5,362 marineros.

Modena - Ejercito - 3,800 hombres.

Parma - 2,800 hombres.

Roma - 16,000 hombres.

Toscana - 16,000 hombres.

Dinamarca - Ejercito - 60,000 hombres. Marina - 126 buques de guerra.

Suecia y Noruega — Ejército de Suecia 144,000 hombres Ejercito de Noruega 24,000 hombres. Marina - 349, buques y 126 chalupas cañoneras.

Portugal - Ejercito - 35,000 hombres comprendidos los cuerpos de las colonias. Marina - 44 buques de guerra.

Países bajos - Ejercito - 58,647 hombres. Marina - 72 buques 58 cañones 7,000 marineros.

Bélgica - Ejercito. - pie de paz 31,400 hombres, 7,322 de Caballería, pie de guerra, 84,000 hombres, y 14,000 de Caballería. Marina - 1 brick de 20 cañones, 1 goleta de 10 cañones 2 chalupas cañoneras.

Suiza - Ejército - 125,000 hombres, comprendida la reserva; Lanvocehr 150,000 hombres.

Grecia - Ejército - 10,000 hombres. Marina - 25 buques.

Estados Alemanes - Ejército Federal, 250, 000 hombres.

Confederación Germánica - Ejército 250, 000 hombres, mas 49,500 Caballos comprendidos los contingentes de Austria y de la Prusia.

Según esta estadística, la Europa tiene desde hace algunos años más de 40.000, 000 de hombres sobres las armas, sin contar los marineros y las guardias civiles nacionales o milicias de toda especie, cuyo guarismo es enorme.

Es copia.
