# Supplementary material for: A Methodological Framework for the Use of AI Tools in Automated Workflows for Generating Validated and Structured Historical Datasets
Source: Research Square preprint supplement (doi:10.21203/rs.3.rs-7943432/v1), 2025-11-17
Supplement: Supplementary file 25 [file Vildo-1-30_GT.docx]

%p1–Vildosola–2025–10–15%

Año de 1857

enero

J.1. Hoy se ha publicado para la administración del departamento, que deben regir las Bases Orgánicas, publicadas, en el año de 1843, y como son conformes al plan de Iguala, que es el que secundarán en los demás puntos del departamento, se ha hecho circular. Hoy también hace renuncia el señor general Calvo, de general en jefe de las fuerzas pronunciadas en esta capital, el día 10 de diciembre del año pasado, por hallarse enfermo, y encarga al señor don Tomás Mejía lo sustituya; el cual, en el acto, pasa revista a las fuerzas, y queda general en jefe de dichas fuerzas. En este mismo día, en la tarde, por orden del señor general Mejía, va una fuerza al mando del señor coronel Florán, al Consulado Británico, para extraer la cantidad de $240,000 que se hallaban depositados en él, y que, por no querer prestarlos, eran sacados por fuerza cuyo dinero no lo podían prestar por ser de varios individuos, pues que es, el que sale en la conducta, la cual había de salir muy pronto. En este mismo día, se dice que el señor Parrodi, se acerca a San Luis, y que las fuerzas de Sánchez no pasan del Jaral. En la noche de este día, pusieron presos a los Señores Paz y Torices, también tenían orden de presar al señor Porras, pero él, teniendo aviso, se escondió. Hoy hubo jubileo en el Sagrario, y villa de Santiago.

V.2. Hoy después de mediar varias comunicaciones entre el señor gobernador y el Cónsul Británico, (el señor don Jorge Chabot) éste queda, se quejará al Consulado de México; además, en las comunicaciones que da el Señor Gobernador, dice, que dicho dinero, será pagado por el señor don Desiderio Samaniego. Hoy salieron libres los señores Paz y Torices.

S.3. Hoy hubo jubileo en el Convento de San Agustín. Hoy por favor del señor don Darío Reyes, consiguió al señor Porras, el que no se le presara.

D.4. Hoy hubo jubileo en el Sagrario.

L.5. Hoy salió de la Hacienda de la Pila, las tropas que forman la división expedicionaria, sobre Guanajuato y demás puntos de la República. En este día, fue nombrado el señor don Francisco Sánchez, jefe de las fuerzas pronunciadas.

J.8. Hoy se sabe que las fuerzas que manda el señor Parrodi no pasan de 3000 hombres de los cuales mitad es de línea, y los restantes de la Guardia Nacional, no teniendo ningún manejo de armas, porque son unos infelices sacados por la fuerza. Hoy hubo jubileo en el Convento de San Francisco, y villa de Tequisquiapan. Hoy en la tarde, tiraron en esquina de San Agustín un cañonazo con solo taco, por haber divisado pasar por la

%p2–Vildosola–2025–10–15%

Garita de México un piquete de Caballería.

S.10. Hoy en la noche se dice que el señor general don Anastasio Parrodi, se acerca a esta capital con las fuerzas que trae a su mando, y por este aviso, empieza el señor don Juan Othón a preparar su marcha.

D.11. Hoy cerca de las dos de la mañana, marcha el señor Othón en compañía de varios señores que tenían parte en el pronunciamiento pasado, y de la poca tropa que había quedado, llevan doce todo el armamento, y parque, no dejando únicamente, más que dos piezas de artillería de bastante calibre, clavadas, y embaladas, de modo que no pudieron servir. En este mismo día viendo el estado que guardaba la población, escapándose de un motín, por haber quedado sin ninguna autoridad ni ningún Soldado; pues la cárcel, los celadores estaban de Guardia, viendo asimismo todas las cosas, se dispuso el que se reuniera el consejo que estaba cuando estaba de gobernador el señor licenciado don José María Aguirre, para que, por la votación de consejo, se nombrara a un gobernador interino, el cual por mayoría de votos, salió electo el señor licenciado don Crescencio María Gordoa, presidente del Consejo; el cual puso en el mismo un extraordinario al señor gobernador el señor Aguirre, el cual se hallará en Aguascalientes. En este mismo día se volvió a encargar de la Prefectura, el señor don José María Aranda y se volvió a reunir la Guardia Nacional, para defender la Cárcel y poner guardias en Palacio. Hoy se fue para México el señor Don Guillermo Rode.

L.12. Hoy en la mañana salió como es de costumbre, el Cabildo Eclesiástico en San Pedro, a dar gracias a la Iglesia del Santuario de María Señora de Guadalupe, rezando el rosario todo el camino, y habiendo guardado su Majestad, expuesto todo el día, en dicha Iglesia del Santuario. En este día, se sigue con bastante empeño el reunir algún parque, como también armas, pues ninguna había dejado el señor Othón; más que dos piezas de artillería, clavadas, las cuales, en la noche, las desclavaron y las dejaron servibles, como también hicieron bastante parque, por decirse que el señor don Juan Othón, en compañía del señor Alfaro volvía a tomar la plaza. En la noche de este día, se sacramento la señora doña Maríana Dávalos.

M.13. Hoy en la mañana se dispuso que salieran más fuerzas al mando del señor Bustamante y Porras, a la villa de los Pozos, a atacar las fuerzas del señor Othón que se aproxima van a tomar la plaza, cuyas fuerzas que de aquí salieron, no fue necesario que llegaran a dicha villa, pues se encontraron en el camino, en donde ambos hicieron fuego y se trajeron prisioneros a los señor don Nicanor Lobo y el señor Sierra; al señor Sierra, lo mataron cuando llegaron a San Luis; y al señor Lobo, tal vez le hubiera sucedido lo mismo, si no es porque a ese tiempo se presentó el señor Othón entrando por

%p3–Vildosola–2025–10–15%

casi todas las bocacalles de la plaza en compañía del señor don José María Alfaro y de las fuerzas que traía a su mando no siendo suficientes para resistir los de la Guardia Nacional, los cuales por orden del señor gobernador de los señores Bustamante y Porras, fueron colocados en varias alturas de la plaza como son el Palacio, el Bazar, la Catedral, y La Lonja habiendo en cada altura cerca de seis, a siete hombres, por ser poca la fuerza y poco el parque que tenían, además, había centinelas en casi todas las esquinas de la plaza, y las dos piezas de artillería que el señor Othón había dejado clavadas, estaban ya en disposición de hacer fuego, más con todo esto, estas fuerzas no fueron suficientes para resistir a las del señor Othón, pues este, casi habiendo acabado de entrar el señor Bustamante y el señor Porras, con los soldados que trajeron prisioneros a los señores Lobo y Sierra, se presenta en la plaza en compañía del señor Alfaro y de las fuerzas que traía su mando, siendo las cuatro de la mañana dadas, entran, las cuales haciendo un fuego muy vivo y sosteniendo el fuego cosa de media hora, logran entrar a la plaza, dejándose también ver el valor de los nacionales, pues se defendieron muy bien; solo los centinelas que estaban en las esquinas, viéndose solos echaron a correr; y el señor licenciado don Luis Días de León capitán de los nacionales dicen se escondió en la Tercena en un costal de tabaco, los señores Bustamante y Porras viéndose perdidos tomó cada uno distinto camino, el señor gobernador don Crescencio María Gordoa como vive en la plaza, temeroso de que le hicieran algo o lo presaran, no teniendo donde esconderse consiguió un vestido de eclesiástico, y de este modo se disfrazó para poder salir de su casa para esconderse. En el mismo día cerca de las ocho de la mañana, pasaron varios oficiales a caballo corriendo con algunos soldados dando vivas también mandaron repicar en el Convento de San Francisco habiendo repicado con la campana del reloj también cerca de las ocho de la mañana que estaba ya la plaza en quietud, dispuso el Señor Othón y el señor Alfaro se hicieran fortines, tomando para esto a muchos infelices y sirvientes como también para levantar los heridos que había tirados, pues según dicen en la media hora que duro el tiroteo, hubo entre unos y otros, y entre muertos y heridos, cosa de 100 hombres. Hoy a la madrugada murió la señora doña Maríana Dávalos.

Mes. 14. Siguen haciendo las fortificaciones con bastante precipitación, y unas por decirse que el señor Aguirre viene con la Guardia Nacional de Aguascalientes, a las órdenes del señor coronel Don J.L.Rivera, por lo cual se provee haya un largo sitio y por este temor, salen hoy muchas familias fuera de la capital. Hoy se enterró en la tercera orden la señora doña Maríana Dávalos.

J.15. Hoy cosa de las nueve de la mañana, estando en las misas cantadas de Nuevo Año por ser jueves, y en un triduo que se estaba rezando en el santuario, cuando fue oído

%p4–Vildosola–2025–10–15%

un toque como a quemazón que se hacía con mucha precipitación en el Santuario, mucho corrieron para ver que era, y otros fueron a la plaza para estar seguros en caso de un motín, a poco rato se circula la noticia, que es el señor Aguirre que venía con la Guardia Nacional de Aguascalientes, y que para aviso de los de la plaza era el toque, pues el señor Othón tenía unos para que avisasen en caso de ver fuerzas por los caminos, luego que se supo esto, el comercio se cerró y toda la gente se recogió a sus casas, cerca de las once de la mañana, paso el señor don Lorenzo que venía en clase de parlamentario, el cual fue recibido en la plaza, y después de haber salido, de la plaza, y de habérsele quedado el corneta con quien fue, le repicaron como por burla, habiendo vuelto él solo a la casa del señor don José María Coca que esta junto del Convento de la Merced, en cuya casa estaba el señor Aguirre; y las fuerzas de Aguascalientes, formadas en la Plazuela; la contestación del parlamento que el señor Vega llevo, fue que había dicho el señor Othón, que por ningún motivo dejaría la plaza, en este día hubo unos cuantos tiros, siendo más en la noche que fue cuando se mudaron de la Plazuela de la Merced, al Convento de San Francisco, durmiendo esta noche el señor Aguirre en casa de las señoras Cadenas. Hoy todavía se siguen sabiendo fuera muchas familias. Hoy se declara la población en estado de sitio.

V.16. Hoy empiezan a hacerse fuego tanto los de adentro, como los de fuera, y en esta noche se pasó un piquete de las fuerzas del señor Aguirre a tomar el punto del Convento de San Agustín, y como en esta misma noche venían a tomar dicho punto las fuerzas del señor Othón habiendo sido el motivo por lo que hubo un gran tiroteo; habiendo tomado dicho punto las fuerzas del señor Aguirre. Hoy mataron al señor Don Archibaldo Estaines. También hoy se pasó el señor Aguirre de las señoras Cadenas, al Convento de San Francisco.

S.19. En este día ya son más continuos los fuegos de unos y otros, haciéndolo desde las alturas que tenían siendo de parte de los de adentro, los puntos siguientes: la Catedral, el Carmen, San Juan de Dios, Colegio de Niñas, la Compañía y las alturas del Obispado, la casa de Moneda, la casa del señor Toranzo, y los altos del señor don Diego Falgar y los de afuera, tenían el Convento de San Francisco, que era el Cuartel General comunicándose por la puerta del Campo, San Agustín habiendo centinelas en todas las bocacalles de portillo á portillo, también tenían el punto del Hospicio, y todas las orillas. En este día, el señor don Luis Legorreta, tomó preso al señor don Genaro Dávalos en la Garita de México, yendo con su familia para el Pozo de luna, después de haberlo agarrado el señor Legorreta, se lo entrego al señor capitán de la Guardia,

%p5–Vildosola–2025–10–15%

don Luis Días de León el cual fue el que lo llevo al Convento de San Francisco donde estuvo preso, en compañía de don Felipe Cortez, al cual lo agarraron por andar viendo una casa y lo condujeron preso al Convento de San Francisco, en donde lo pusieron en la cárcel donde estaba el señor Dávalos, estando ambos incomunicados y con tres centinelas de vistas.

D.18. Hoy viniendo el señor don Manuel Escontría de su hacienda, por su familia: al llegar a la capital, fue detenido en la Garita, y traído preso al Convento de San Francisco, habiéndole quitado en la misma Garita, el caballo en que venía y una espada: poniéndolo preso en compañía de los señores Dávalos y Cortés. En este mismo día, habiendo hecho el señor don Francisco Estrada, empeños con el señor Aguirre para que los señores Cortés, Dávalos y Escontría que estaban en clase de presos en el Convento de San Francisco saliesen, no habiéndolo conseguido, logró el que la prisión la pasasen dichos señores en su casa bajo su responsabilidad; habiendo pues salido dichos señores de San Francisco a la casa del señor Estrada, el señor Escontría y el señor Cortés, le pidieron permiso al señor Estrada para irse a la casa del señor don Paulo Verástegui, cuyo permiso fue dado por el señor Estrada habiéndose ido ambos.

L.19. En este día murió la señora doña Alejandra Rondano, habiendo sido enterrada en el campo-Santo de San Miguelito.

M.20. En la noche de este día salió un piquete de los soldados de la plaza, a tomar el punto de San Agustín, habiendo habido muchos tiros: y no habiendo ya podido resistir los de la plaza, se volvieron sin haber tomado ningún punto. Después de esto, los soldados de fuera, creyendo que el ataque era por querer sacar los presos que estaban en la casa del señor Verástegui, empezaron a balearla; pero pararon el fuego muy pronto.

Mes.21. En este día nos salimos para la casa de mi tía Atanasia (será de las dos de la tarde) por no dejar pasar al mozo con comestible, en esta casa estaba mi tía Atanasia, con las dos niñas Duques, doña Margarita y doña Asunción, la familia del señor Estrada y el señor don Manuel B. Castillo, con su señora; además de estas personas, estaba también el señor Dávalos que estaba como en clase de preso. En la tarde volvió a salir una fuerza de los de la plaza, para tomar el punto de San Agustín, la cual entro hasta cerca de la bocacalle de la Cruz, queda para San Francisco; habiendo corrido los centinelas de las bocacalles de la Cruz San Francisco y la Concepción a refugiarse al cuartel por estar muy aislados en las esquinas; luego que se acercaban más las fuerzas de la plaza, empezaron a hacer fuego para San Francisco y San Agustín, contestándoles también desde dichos puntos: y no habiendo podido tomar ningún punto, se volvieron para la plaza.

%p6–Vildosola–2025–10–15%

J.22. En este día habiendo sabido el señor Aguirre lo que el día de ayer había pasado en la casa en del señor Verástegui, dio orden al señor Estrada, para que hiciera volver a su casa a los señores Cortés y Escontría, lo cual al momento fue obedecido, haciéndose venido dichos señores a la casa del señor Estrada. Hoy murió el señor don Dionicio Palomo.

Mes.28. Hoy salió para la carpintería del Señor Gollena, el Señor Licenciado Don Tirso Vejo, habiéndose ido el mismo día, para la villa de la soledad de los Ranchos.

S.31. Hoy sigue el fuego entre ambos, habiendo bastantes heridos: cesando un poco los días domingo, en que había Misa en el Convento de San Francisco para los Soldados de ahí, y para los de afuera en la Plaza. también en el Convento de la Merced había Misa por ser la única Iglesia del centro, que estaba sin tropa pues iba alguna gente. En las villas también había Misa, pero sin llamarlas.

Febrero

S.1. En este día fue la Señor Rondano con una niña, a la casa de mi tía Atanasia, por no poder aguantar en su casa las muchas balas que caían.

L.2. Hoy pario doña Elena esposa del señor don Pascual García, asistiéndola el señor don Francisco Estrada, pues era el único médico que estaba fuera. También a los heridos que había en señor Francisco, el los curaba.

M.3. Hoy por empeños que hizo el Señor Estrada con el señor Aguirre, consiguió el señor don Genaro Dávalos, licencia para ir a la Hacienda del Pozo de Luna, a ver a su familia con la condición, de que se si triunfaba el partido liberal, volvieron a presentarse al señor Aguirre; y si no triunfaba dicho partido, tomara el camino que le pereciere; esta licencia también la consiguió el Señor Estrada para los otros Señores que estaban en clase de presos, el señor Escontría, y el señor Cortés, para que pudieran también ir a ver a sus familias; pero estos señores no quisieron, solamente el señor Dávalos, se fue en el mismo día.

J.5. En este día murió la Madre del padre Fray Francisco Orozco, guardián del Convento de San Francisco.

S.7. Hoy por extraordinario recibió el señor Aguirre la noticia de que las fuerzas que mandaba Sánchez y Osollo, después de 16 días de sitio, en el Cerro de la Magdalena, tomaron el camino de Guanajuato en donde fueron derrotadas dichas fuerzas, por las del señor Parrodi, habiendo en esta lucha el Osollo, un brazo que le llevo una bala de Cañón.

%p7–Vildosola–2025–10–15%

D.8. En este día se le avisa al señor Othón por medio de un parlamentario, que el señor Parrodi derroto las fuerzas que traían a su mando, los señores Sánchez y Osollo, para la cual enseñaron al Señor Othón, el comunicado que el señor Parrodi había mandado el Señor Aguirre; lo cual no en el señor Othón, y contesta que de ninguna manera se rinde; repicando tanto los de la Plaza, como los de fuera terminando con agonías y dobles porque cada uno creía lo que le parecía.

Mes.11. Hoy entre 10 y 11 de la mañana hay sus repiques por los de fuera, contestando a poco los de adentro, y continuando ambos con dobles: acabados dichos repiques, tocan parlamento los de afuera, el cual fue tocado en la bocacalle de la Cruz que mira al portillo del costado, del Convento de San Francisco; dicho parlamento fue admitido por los de a dentro, pasa el parlamentario vestido de encarnado, el cual es mandado por el señor Vidaurri que había llegado, y estaba en la villa de Santiago en donde había puesto su cuartel general: y por cuyo motivo habían repicado en el Convento de San Francisco desde que divisaron sus fuerzas, por lo que el repique de los de la Plaza no fue más que porque no creerían que venía el señor Vidaurri; y repicaron por burla: en fin, entra el parlamentario a la plaza después de haber tocado parlamento por la bocacalle de la Cruz, habiéndole primero tocado por la bocacalle de la Compañía, pues estaba más cerca de Santiago, pero como por dicho punto no fue oído el parlamento, lo tocaron por segunda vez por donde llevo dicho, luego que el parlamentario entro a la plaza, se reunió en las esquinas mucha gente esperando que volviera el parlamentario, el cual pasado una hora volvió, y dio la noticia de que los señores Othón y Alfaro, contestaban que no se rendían, pero que sin embargo rendirían a los demás jefes, y que a las 3 de la misma tarde resolverían. En este mismo día en que el señor Vidaurri llego a la villa de Santiago, los indios no querían en aquella villa al Padre Fray Antonio Mata, y por cuya razón lo llevaban fuera: pero viendo esto el señor Vidaurri cuando, que lo quitaran a los indios, lo cual vio el señor don Juan Bustamante, habiendo amenazado a los indios. Además con respecto a las resultas del parlamento, se esperaba que durante el espacio que los señores de adentro habían puesto para resolver si se rendían o no, habían de cesar los fuegos, pero no fue así, porque cerca de las 2 de la tarde empezó un fuego constante y vivo por los puntos de la Compañía, se supo, que dicho tiroteo, fue, porque la plebe que estaba ganosa de que hubiese un saqueo, empezaran a insultar a los soldados del señor Vidaurri; estos, se empezaron a enardecer y sin orden del señor Vidaurri se vinieron a atacar los puntos de la Compañía, Colegio de Niñas, y San Juan de Dios, tomando

%p8–Vildosola–2025–10–15%

al mismo tiempo dichos puntos por estar defendidos con muy pocas fuerzas, a las 3 de la tarde que era la hora en que había de volver el parlamentario a la plaza, para ver que resolvían, fue, habiendo tocado antes parlamento; contestando los de la plaza, que no se rendían por ninguna manera, además de ver que el tiroteo se avivaba más por el rumbo de San Juan de Dios, en esta misma hora, ínterin estaban en el tiroteo muchas de las casas que estaban en ese rumbo, fueron saqueadas entre ellas, la casa del señor don Nicanor Lobo, y su cerería, la casa del señor don Joaquín Cabral, la cerería del frente de la Capilla del Rosario, la casa del Padre Téllez, al cual le robaron 300 pesos en efectivo, las que había escondido en la cornisa de una de las puertas de la casa, la casa del señor Briontt el cual fue herido de un brazo por un balazo que le dieron por reusar el entregar algunas alhajas, las cuales, viendo su señora lo que le había su cedido, al momento las entrego sacándolas de un caño en que las tenía escondidas el señor don Francisco Cabrera también fue herido de la frente con la culata de un fusil y tal vez lo hubieran matado sin su señora no se les inca, al señor don Joaquín Cabrera también después de saquearle su casa, le pedían dinero apuntándole para que se las entregara, hasta que viéndose un poco libre, hecho a correr a refugiarse un fortín. En fin, otras varias casas fueron saqueadas, y otras que no pudieron por ser donde con más fuerza estaba el tiroteo, en esta misma hora se quemó un Jacal. Con respeto a la toma del punto del Convento del Carmen, siguen tiroteándose habiendo algunos muertos y heridos también para poder atacar el punto del Carmen, fueron a tocar la casa del señor don Ramón Saavedra, el cual al abrírselas recibió un balazo en la cara a boca de jaro, habiéndole entrado la bala por fortuna, entre cuero y carne, subidos ya los soldados en esta altura, y habiendo bastantes en la Plazuela hacen fuego al Carmen muy vivo mientras esto pasaba por este rumbo muchos de los Soldados que estaban en la casa de moneda, dieron muestras de querer pasarse a los de San Francisco, lo que algunos hicieron descolgándose con algún riesgo de que les pegaran un tiro pues estaban haciendo fuego los de la torre de San Francisco en fin un oficial de los de San Francisco, corrió a darles auxilio llevándoles reatas para que pudieran descolgarse, pero este, fue herido por uno de los de su cuerpo, y ya no se supo si se pasaron o no. Cerca de la oración los soldados que había en la altura del Carmen, habiéndoseles acabado el parque tocaron una esquila en seña de que llevasen parque y doblasen la Guardia pues apenas 30 hombres, eran los que había en dicho puesto más cuando oyeron la esquila doblaron la guardia y se prepararon para el ataque.

%p9–Vildosola–2025–10–15%

La noche estaba en gran silencio, y se esperaba un motín pues no se oía ni correr la voz los centinelas y la razón era que, como estaban preparándose para el ataque a la plaza, lo cual se disponía del modo siguiente: y es que, las fuerzas del señor Vidaurri atacara a las órdenes del señor coronel Aramburri, por los puntos de la Cruz y la Moneda, otra fuerza al mando del señor coronel Zuazua, también debían de atacar; y las de Aguascalientes, que son los que estaban en San Francisco al mando del señor coronel Longinos, debían de repartirse para guardar la población de un motín, este es el plan dispuesto para la media noche dar el ataque, de cuyo plan, no fue necesario hacer uso, porque cerca de las 11 de la noche, después de haber mandado el señor Othón reunir a la plaza la que estaba en el Carmen, y los que estaban en la altura del Obispado y habiéndoles dado su libertad a las soldados, y escondidos los cabecillas, tocaron parlamento, el cual lo tuvieron que repetir por no haber sido oído el primero, en cuyo parlamento trajeron un pliego que mandaba el señor Othón, firmado por el general Lama en que decía, podían disponer de la plaza a la 2 de la mañana, y que los hacia el entregarla, por libertad a la población de un motín.

J.12. Hoy a las 2 de la mañana hubo un pequeño repique en Catedral. Al amanecer luego se conoció todo lo que había pasado y más al ver quitadas las centinelas de las esquinas y la mucha gente que se reunía en las calles viendo los destrozos que habían hecho las balas. En este día se esperaba un repique general, pero no hubo nada por temor de que la plebe no se alarmara para saquear, por cuya razón, mucha gente estaba temerosa de salir. En la misma mañana le pasaron al señor Estrada una comunicación del señor Chaves (director de la Casa de Moneda) para que hubiera una junta para ver lo que se había perdido. En la misma mañana les dio licencia el Señor Estrada, a los presos para que fueran a sus casas con la condición de presentarse al día siguiente, para presentarlos al Señor Aguirre, despidiéndose de la casa los señores Cortés y Escontría. Hoy fuimos a casa papá y yo para disponerla para irnos el día siguiente, también en esta mañana fue el señor Estrada a la plaza a abrir la casa del señor don Pascual García, para que la catearan, favor que el señor García pidió al señor Estrada para que no se le perdiera algo con el achaque del cateo, luego que el Señor Estrada acabo de serrar la casa no lo dejaba salir el centinela porque decía había orden de no dejar entrar ni salir a nadie sin orden del señor Bustamante, que estaba en el Bazar, al cual no le pudo hablar el señor Estrada, por estar ocupado. En fin, después de 1000 batallas hubo de

%p10–Vildosola–2025–10–15%

salir el señor Estrada saliendo por encima del cañón, pues era la única salida que había. Además de la casa del señor García, catearon varias casas entre ellas todas las inmediatas a la plaza, la del señor Paz, la del señor licenciado Valdez, cuya casa la deslozaron para atrancar mejor la puerta, los oficiales que se hallaban escondidos allí también otras casas catearon lo que hicieron para, ver si había oficiales de los de la plaza escondidos y particularmente los señores Othón y Alfaro, llevándose presos a Palacio todos los oficiales que encontraban, y también a otros entre los que llevaron, al Padre don Luis Arias, al hijo del señor Licenciado don Antonio E. Valdez, y a otros varios pero estos señores salieron libres hoy mismo. El general Lama no teniendo modo de esconderse se escapó habiendo formado una blusa con un zagalejo, y su rifle en la mano y así pudo salirse entre los soldados del señor Vidaurri, pues de este modo andaban vestidos. El señor Alcántara también pudo escaparse habiéndose puesto tras una cortina. En fin, ya los que se habían escapado ya no eran buscados pues a quien buscaban con empeño era a los señores Othón y Alfaro a los que buscaban hasta en las linternillas de las torres habiendo antes mandado rodear la ciudad para que no pudieran irse. Toda la mañana y casi toda la tarde de hoy anduvieron buscándolos hasta que cerca de las 6 de la tarde, fueron hallados en la Iglesia del Colegio de Niñas debajo del cajón que forma el frontal del Altar mayor de dicha iglesia, y tal vez no los hubieran encontrado, pues según dicen una persona fue la que dio aviso de que ahí estaban escondidos, la misma que les dio el consejo de que ahí se escondieran. Luego que dichos señores Othón y Alfaro fueron sacados los condujeron presos a palacio en donde estaban presos los demás oficiales, a los que a poco rato los separaron. En la noche le llevaron un papel al señor licenciado don Manuel B. Castillo para que firmara y asistiera a palacio, lo primero hizo, pero lo Segúndo no por no saber el motivo de dicha junta lo cual después se supo, y era para formar el Ayuntamiento. Salen hoy varias patrullas de caballería, é infantería, para defender la población.

V.13. Hoy se presentó el señor Cortés al señor Estrada para que lo presentara al señor Aguirre (Gobernador del Estrado) no habiendo podido ir el señor Escontría como quedo por estar un poco enfermo lo que mando avisar con el señor don Mateo Rada y por lo tanto le dijo el señor Estrada al señor Cortés se presentara hasta el día siguiente. En la tarde nos fuimos a casa despidiéndonos de todos los que había en la casa de mi tía Atanasia. En este día ya se sonaron las campanas dando los toques de costumbre, y en la noche se encendieron los alumbrados poniéndose los Serenos en sus puntos respectivos; y las patrullas si

%p11–Vildosola–2025–10–15%

guen rondando la población.

S.14. Sigue la tranquilidad pública, habiendo ya misas y los toques de los canónigos.

D.15. Hoy empiezan a llegar las familias que por temor se habían salido fuera. En la tarde hubo función de Toros en el Montecillo.

L.16. Hoy ha sido nombrado Administrador de rentas de esta capital el señor don José Antonio Barragán.

M.17. Hoy recibió el empleo del estado, el señor don Santiago Ramos.

Mes.18. En este día es nombrado el señor licenciado Escobar, Juez 3° de letras de esta capital.

V.20. En este día dispuso el señor Vidaurri se dijeron una misa a María Señora de Guadalupe en su Santuario, en Acción de Gracias habiendo asistido varias personas, las autoridades, y la tropa. El sermón lo predico el M.R.P.F. Manuel Gonzáles. Provincial del Convento de San Francisco de esta capital.

D.22. En este día se le hizo al señor Vidaurri asistiera a la casa del Señor don Pilar Bustamante, donde se le dio una comida habiendo habido música y tocado un himno dedicado al señor don Santiago Vidaurri, compuesto por el señor don Romualdo Castillo, a la mesa asistieron varias personas. En este día se empezaron las máscaras, siendo muy pocas las personas que se vistieron. En la noche hubo bailes en el Teatro.

L.23. En la noche de este día baile en el Teatro.

M.24. En la noche volvió a haber baile en el Teatro.

Marzo.

D.1. Hoy empezaron los ejercicios de la cuaresma que anualmente hace el presbítero don Ambrosio Pereda, habiendo sido en el Convento del Carmen. En la noche se dio un baile al señor Vidaurri en el Teatro habiendo sido dicho baile de máscaras. También hubo en esta misma noche baile en la Sociedad Potosina (Conocida con el nombre de la Lonja). Hoy hubo sermón en Catedral. También hubo jubileo en el Sagrario y Villa de Santiago.

M.3. Hoy Jubileo en el Convento de San Agustín.

Mes.4. Hoy hubo sermón en el Convento de San Agustín. En la noche de este día dio el señor Vidaurri un gran baile en el teatro, al que asistió bastante gente. En este día hubo órdenes de epístola en Catedral. También hubo jubileo en el Sagrario. En la noche sermón en Tercera Orden.

%p12–Vildosola–2025–10–15%

V.6. En la noche de este día mataron a don Regino Colorado las patrullas que andaban de los Soldados de Nuevo León, el motivo fue que, yendo dicho señor de ronda, le dieron el quién viva y no habiendo respondido, le tiraron.

S.7. En este día le dieron un día de campo al señor Vidaurri.

D.8. En este día hubo orden de Evangelio en el Obispado. En este día fue nombrado comandante general de San Luis Potosí, el señor don Mariano Morett.

M.10. En este día salieron para su estado las fuerzas de Nuevo León, al mando de los Señores Zuazua y Aramburri.

J.12. Hoy jubileo en el Santuario de Guadalupe. Hoy salió el señor Vidaurri para Nuevo León despidiéndose de los potosinos, por medio de una proclama. En la tarde llegó el señor Morett con el 3° Regimiento de Caballería. Hoy se fugó del Convento del Carmen en donde se hallaba preso el Señor Alfaro.

V.13. Hoy pasaron al Señor Othón que se hallaba preso en el Convento del Carmen, lo pasaron al Cuartel. En la noche hubo sermón en Tercera Orden, habiendo habido por la tarde en el Convento de San Francisco.

D.15. Hoy se establece un tercer correo para México. También por limosna de algunos y algunas devoto-as [sic] de la Purísima, se estableció un jubileo en el Colegio de Niñas para todos los días 15 del mes en honor de dicha imagen. Órdenes de Pro.

L.16. Jubileo en el Convento de Carmen.

J.19. Hoy Jubileo en el Convento de San Agustín y en el Sagrario. En este día cantó misa el Padre don Pedro Gaitán en el Convento de San Agustín, habido predicado el presbítero don Telésforo Macías. En el mismo día cantó misa en la Villa de Santiago el R.P.F. Buenaventura Méndez.

V.20. Hoy en sermón San Francisco y en la noche Tercera Orden. En este día llegó preso a esta capital el señor don Manuel Calvo, el cual es puesto preso en el Convento de San Francisco. También se sabe que el señor Alfaro es aprendido en la hacienda de Vanegas y que antes de conducirlo para acá se les fugó. En este día se le da su casa por cárcel al señor don Francisco Sánchez por hallarse enfermo.

D.22. Hoy cantó misa en la Villa del Montecillo el P. Arriaga habiendo predicado el P. don Pablo Anda.

M.24. En este día hay jubilo en el Convento de la Merced.

Mes.25. Hoy sermón en el Convento de San Agustín.

%p13–Vildosola–2025–10–15%

D.29. Hoy se pasaron los soldados que componen la Guardia Nacional de Aguascalientes, que estaban en el Convento de San Francisco, se pasaron al Cuartel del Carmen. En este día se publicó la nueva constitución habiendo muy poca tropa para su publicación, y unos cuantos regidores. Los repiques que se dieron mientras salía el bando, fueron muy tristes pues en varias Iglesias no quisieron replicar. En la noche salió un carro que llevaba un cartel en el que estaban escritas palabras ¡¡¡Viva la religión verdadera!!! [sic] Por lo que el periódico pregunta si acaso la religión que se profesó no es la única verdadera la Católica Apostólica Romana.

L.30. En este día se hizo jurar la nueva constitución, a todos los empleados. La cual no es jurada por los empleados siguientes: don José María Sousa, vocal del Excelentísimo Consejo - licenciado don Guadalupe de los Reyes - presidente del Supremo Tribunal de Justicia - licenciado don Luis Guzmán – magistrado - licenciado don Julio Gutiérrez Castillo – magistrado - licenciado don Tirso Vejo – magistrado - licenciado don Juan Ortega - fiscal nombrado por el Tribunal - licenciado don Marcelino Castro - secretario de la Sala del Tribunal - licenciado don Manuel B. Castillo - Defensor de Pobres - don Jesús Ávila - escribiente del Tribunal - don Antonio Valdés - escribiente del Tribunal - licenciado don Antonio E. Valdés - don Francisco Estrada - contador de la Casa de Moneda - don Mariano Cataño - ensayador de la Casa de Moneda - don Victoriano Galindo - fiel de la Casa de Moneda - don Luis Márquez - escribiente de la Casa de Moneda - don Tomás O. de Parada - director del Hospicio de pobres de San Juan de Dios - don Francisco Sánchez Lara - vocal de la junta directiva - don Antonio R. Fernández - vocal de la junta directiva - don J. Oviedo - escribiente de la Aduana - don Ricardo Ulibarri - escribiente de la Aduana - don Jacobo Ulibarri - escribiente de la Aduana - don Rafael Mier - guarda de garita - don Juan Rocha - guarda de garita - don Bonifacio Arlegui - escribiente auxiliar de la Prefectura - don Francisco Camacho - ensayador de cajas prestó el juramento y en el mismo día se retractó. En este día se hace saber por medio de una circular que dio el Señor Arzobispo de México, la cual han obedecido todos los señores obispos, que, todos aquellos que han jurado la Constitución de 1857 no podrán ser absueltos cuando lleguen al sagrado Tribunal de la confesión, si no, es que se retracten públicamente.

M.31. En este día salió de la Imprenta de Dávalos un nuevo periódico: "La Razón". Siendo los redactores del periódico, los señores licenciados don José Castillo, y Don Miguel Laso. En este día, parió la señora doña Susana Gutiérrez Castillo, esposa de don Jacobo Urtetegui. En este día fue nombrado prefecto el señor don Martín Gascón, y secretario el señor don Rafael Vega.

%p14–Vildosola–2025–10–15%

Abril

Mes.1. En este día se bautizó a la niña de Susana Gutiérrez Castillo, habiendo sido sus padrinos; de óleos, el M.R.P.F. Francisco de San Rafael, prior del Convento del Carmen, y de manos, el señor don Rafael Urtetegui y la señora doña Ricarda Soberón. Hoy jubileos en el Sagrario y Villa de Santiago.

J.2. En este día se ha encargado del gobierno el señor licenciado don Crescencio María Gordoa, por estar enfermo el señor Aguirre, también en este día no quisieron admitir para el Consejo a los señores licenciado don Miguel Laso, y el señor don Francisco Cabrera que fueron nombrados. En este día, dejó la Prefectura el señor Gascón habiéndola recibido el señor licenciado don Francisco Arriola.

V.3. En este día cantó misa el P. Fonseca en el Convento de San Agustín habiendo sido sus padrinos, el señor licenciado don José María Esparza Pereda y don José María Sousa. También en el Convento de San Francisco cantó misa el P. Robles habiendo sido sus padrinos los señores don Tomás Revilla, y don Silvestre Portillo. En el Convento de San Agustín, predicó el P. don Mariano Saldaña. En este día hubo jubileo en el Convento de San Agustín. Hoy concluyeron los Ejercicios.

S.4. En este día jubileo en el sagrario de Catedral. En la tarde hubo salves en los Conventos del Carmen, San Agustín, y Convento de la Merced. En este día dejo la prefectura el señor Arriola y se encargó de ella el señor Aranda.

D.5. En este día fue publicada y jurada la constitución en las villas. En la tarde llegó de la Villa de los Ranchos el señor del Refugio.

L.6. En este día salió la procesión del señor del Refugio de Catedral.

M.7. En este día salió procesión de Catedral.

Mes.8. Hoy salió procesión de la Villa de San Sebastián, habiendo pasado también por la calle de la Estación.

J.9. Hoy salió procesión de Catedral habiendo salido el señor de la Caída con bastantes luces, de casi todos los que han andado los Ejercicios. En la mañana de este día fueron los sermones de las tres Caídas, habiendo salido nuestro padre Jesús. En la noche salió a visitar los monumentos, el cabildo eclesiástico y civil, habiendo estado los monumentos muy tristes por la pérdida que han tenido los conventos, con motivo de la Ley de Desamortización, únicamente el del Convento de San Agustín que fue el más adornado.

V.10. Hoy salió la posesión del Convento de San Francisco habiendo alumbrado.

%p15–Vildosola–2025–10–15%

mucha gente, á esta proposición se agrega la de la villa de San Miguelito. En la noche hubo sermón de pésame en el Convento de San Agustín habiéndolo predicado el P. Saldaña.

S.11. En este día salió la procesión de los Remedios (capilla perteneciente al Convento de San Francisco) habiendo salido el Santo Entierro para la villa de San Miguelito. Hoy salieron desterrados los señores Dávalos, Guzmán y Vega.

L.13. Hoy en mañana se fue para los Ranchos el Señor del Refugio.

M.14. Hoy se fue para la Villa del Montecillo el Señor de la Misericordia.

J.16. En este día prestó el juramento a la constitución el señor licenciado don Francisco Guzmán para encargarse de la fiscalía. También el señor licenciado don Fortunato Nava lo prestó, para encargarse del juzgado 1° de esta Capital.

Mes.22. En este día murió el señor don Manuel Othón. Hoy volvió ha encargarse del gobierno el señor licenciado don José María Aguirre, habiéndose separado de la secretaria, el señor licenciado don Antonio Ávila. En este día prestó el juramento de la constitución el señor licenciado don Mariano Villalobos (padre) para encargarse del Juzgado 2° de letras de esta ca pital.

J.23. En este día se casó el señor don Francisco Gordoa con la señora doña Margarita Díaz de León los casó el señor cura de Ahualulco (el presbítero don Jesús Gordoa) hermano de don Francisco. Se casaron en el Convento de San Francisco.

S.25. En este día salió letanía de Catedral, habiendo ido al Convento de San Agustín. En el mismo día fue nombrado fiscal de imprenta el señor Don Fermín Miranda. y director del Hospital de Pobres, el señor don Buenaventura Paz.

Mes.29. Hoy tomó posesión del Consejo el señor don Buenaventura Paz.

J.30. En este día tomó posesión de la prefectura el señor don José María Paz y Cardona.

Mayo

V.1. En este día hubo jubileo en el Sagrario y Villa de Santiago. Hoy murió el señor don Ignacio Legorreta.

D.3. Hoy salió tropa (de Caballería e Infantería) para Rioverde por decirse que el señor Mejía se acerca a este punto. En este día hubo jubileo en el convento de San Agustín.

L.4. Jubileo en el Sagrario. En este día quitaron de secretario de la Prefectura al señor don Rafael Vega.

%p16–Vildosola–2025–10–15%

V.8. En la noche de este día llego el batallón de la Guardia Nacional de Guanajuato, el cual batallón trajo dos piezas de Artillería (chicas) habiendo tomado para cuartel al Convento de San Francisco. En este día jubileo en San Francisco y Villa de Tequisquiapan.

S.9. Salves en el Carmen, San Agustín y la Merced. Hoy se nombró fiscal de imprenta al señor don José María Aranda.

L.11. Hoy salió a misa la señora doña Susana Gutiérrez Castillo; habiéndola sacado doña Ricarda Soberón. La misa la dijo el P. Prior del Convento del Carmen.

M.12. Jubileo en el Santuario de Guadalupe.

J.14. En este día llego el señor Dávalos del Valle donde días pasados se le mando para que sufrirse destierro, lo mismo que al señor don Francisco de Sales Guzmán, por haber tenido parte en la revolución, y para que no trabajaran en las elecciones se desterraron. En este mismo día llego de la hacienda del Pozo de Acuña, el Señor Don Evaristo Dávalos el cual llegó en clase de preso por haber sido acusado de que trabajó para que en dicha hacienda no hubiera elecciones. En esta tarde le pegó de bofetadas y patadas el señor don Domingo Urtetegui (Hijo) al señor Magistrado y licenciado don Félix R. Gomes. En la noche murió la esposa del Señor Don José María Arias.

V.15. Jubileo en el Colegio de Niñas. En la noche murió el señor don Juan Gómez.

S.16. Hoy jubileo en el Convento del Carmen. En la tarde salves en San Agustín, el Carmen, y la Merced. En el mismo día llevaron el cadáver del señor don Juan Gómez a la hacienda de la Pila donde se sepultó.

D.17. Hoy llegó el señor don Mariano Vega de la hacienda de Cruces que fue la parte donde se le asignó para su destierro. En la noche hubo la primera función de teatro por la compañía dramática del señor Arias representando la comedia titulada: "Los dos médicos rivales, o una enferma de amor" y de sainete "Los amores andaluces."

L.18. Hoy puso un Palloiorama [sic], el señor don Alfonso Dupon, en la casa del club de Armas. En la noche murió la señora doña F. Rivas tía de las hijas del Señor Rivas. Hoy llegó a esta capital de paso para México el señor don Santiago Vidaurri. Hoy hubo letanía de los santos habiendo salido de Catedral para el Convento de San Francisco.

M.19. Hoy jubileo en el Convento de San Agustín y en el Sagrario. Hoy salió la letanía de Catedral al Convento del Carmen.

Mes.20. Hoy salió para México el señor Vidaurri con una pequeña escolta. En este día hubo letanía habiendo dado vuelta por la plazuela de Catedral.

%p17–Vildosola–2025–10–15%

J.21. En este día trajeron a María Santísima de Guadalupe de su Santuario, para la Iglesia Catedral donde se le va a hacer el novenario que anualmente se le hace. En la noche hubo función de Teatro, representando la comedia titulada: "El preceptor y su discípulo."

V.22. Hoy se casó el señor licenciado don Juan Arriola, con su sobrina doña Merced Arriola.

D.24. En este día hubo jubileo en el Convento de la Merced. En este día parió la señora doña Teresa Lambarri. También en este día se han hecho las elecciones para disputados del Estado, siendo nombrados, los señores siguientes: propietarios don Eulalio Degollado, don Miguel Esparza, licenciado don Crescencio María Gordoa, licenciado don Francisco Villa Nueva, licenciado don Gregorio Vázquez, don Antonio Ladrón de Guevara y don Martín Gascón. Suplentes. Don Alejandro Nieva, don Juan N. Viramontes, don Ramón Francisco Gamarra, don Rafael Vega, don Cipriano Zepeda, don Luis Lozano y don Manuel Oviedo.

L.25. En este día se hicieron las decisiones para Gobernador del Estado, habiendo salido electos con el número de votos que expresan, los señores siguientes; C. don Eulalio Degollado con 146 votos, don Anastasio Parrodi, 94 votos, don Paulo Verástegui, 21, don Crescencio María Gordoa, 37. Las votaciones por el distrito de Rioverde fueron siguientes: don Anastasio Parrodi, 100 votos, don Paulo Verástegui 35. Por Catorce, don Paulo Verástegui 53, don Anastasio Parrodi, 23. Por Tancanhuitz, don Paulo Verástegui, 65, don Anastasio Parrodi, 2, don Manuel Verástegui, 1. Resulta de todas las elecciones. don Anastasio Parrodi con 219 votos don Paulo Verástegui con 243, don Eulalio Degollado con 146. y don Crescencio María Gordoa con 37 votos. Hoy dio un papel al público el señor don Fermín Miranda.

M.26. Hoy entre 6 y 7 de la mañana se ha fugado el señor don Juan Othón del Cuartel del Carmen en que se hallaba preso. En este mismo día bautizo el M.R.P. Guardian del Convento de San Francisco Fray Francisco Orozco, al niño del Señor Larrache al cual le pusieron el nombre Gregorio María Ignacio Larrache, siendo sus padrinos de brazos el señor don Gregorio Lambarri y la señora doña Asunción Larrache.

Mes.27. En este día salió para su estado la Guardia Nacional de Aguascalientes que estaba en el Cuartel del Carmen habiéndose pasado para dicho cuartel, los de la Guardia Nacional de Guanajuato que estaban en el Convento de San Francisco. En este día llego el señor don Julio Galnares con sus dos hijos.

J.28. Hoy se casó don Encarnación Trujillo con doña Paz Calderón. En este día se encargó de la redacción del periódico "La Razón” el señor presbítero don José María Sánchez

%p18–Vildosola–2025–10–15%

Gutiérrez (Catedrático del Seminario)

D.31. En la tarde de este día fue conducida la Santísima Virgen de Guadalupe para su Santuario habiéndola acompañado hasta la Merced todas las comunidades, y después de haber pasado la conservera, se observó que corría la gente para refugiarse a sus casas, cuyo motivo fue por haber habido un pleito en el llano del Santo. En la noche se representó la tercera comedia de abono titulada: “Don Juan Ruiz de Alarcón en la corte de Felipe IV" y de Sainete: "A lo hecho pecho o las travesuras de un sastre".

Junio

L.1. En este día hubo jubileo en el Sagrario. En la noche murió repentinamente el señor don Antonio Rodríguez. También hubo Jubileo en Santiago.

M.2. En la noche se representó la comedia titulada: "Germán el bueno."

Mes.3. Hoy jubileo en el Sagrario y Convento de San Agustín. En este día hubo órdenes en el obispado.

J.4. En este día se acabó de formar la Guardia Nacional para Atacar a los españoles habiéndose apuntado muchos. A dicha Guardia Nacional, le dieron el Cuartel del Carmen y en la tarde pasaron revista con música. Hoy jubileo en el Sagrario. En la noche se representó la comedia titulada: "República conyugal o un pronunciamiento femenil” y de Sainete "El corazón de un bandido."

V.5. Hoy tomó posesión de la contaduría de la casa de Moneda el señor don J. M. Boeta.

S.6. En este día fue quitado del empleo de colector de Billetes de las loterías de Nuestra Señora de Guadalupe y San Carlos, al señor don Manuel Escontría por no haber prestado el juramento a la constitución, quedando de interino y sin necesidad del juramento el señor don Mateo Rada.

D.7. Hoy hubo órdenes de evangelio en el obispado. En este día deja el empleo de administrador de naipes el señor don J.M. Tornel y Bonilla por no haber prestado el juramento a la constitución. En la noche hubo retreta en el Cuartel de los Libres del Potosí (que así le pusieron al cuartel del Carmen, donde estaba la Guardia Nacional.) En este día hubo jubileo en el Sagrario y Convento de San Francisco. En la no che se representó la comedia titulada: "Don Francisco de Quevedo" y de Sainete "Los dos amigos un choque o el dote de medio millón" por la tarde hubo ejercicio con música en el Cuartel del Carmen.

%p19–Vildosola–2025–10–15%

L.8. Hoy cesó el periódico titulado “El Patriota”.

J.11. Hoy en la noche se representó la comedia titulada: "La pensión de Venturita o un mexicano en España" y de Sainete, "Los percances de un apellido". En la misma noche hubo baile en la Lonja (Sociedad Potosina) En este día fue el Corpus-Crhisti cuya función la hubo el ilustrísimo señor Obispo.

V.12. Jubileo en el Santuario de Guadalupe. En la noche se sacramento la señora doña Lugarda Salazar.

S.13. Hoy se ha mudado el señor don Genaro Dávalos con su familia, a la casa que dejó el señor don Manuel Escontria (porque dicho señor se fue a México) en cuya casa que tomó Genaro va a poner su imprenta. Hoy dijo el P. Proa su primera misa (en el Convento de San Francisco) después de haber estado suspenso más de dos años. Salves en San Agustín, el Carmen y la Merced.

D.14. Hoy hubo función en el Convento de San Francisco por ser domingo de sacramento. En la tarde tuvieron ejercicio con música los Libres del Potosí, en el Cuartel del Carmen. En la noche se representó la comedia titulada: "Traidor inconfeso y mártir". En este día hubo órdenes (de presbíteros) en el obispado. En este mismo día, parió la señora esposa de don Cayetano Garaña.

L.15. Hoy hubo jubileo en el Colegio de San Nicolás. En este día salió para México el señor don Genaro Dávalos. En la noche hubo retreta en el Cuartel del Carmen.

M.16. Hoy parió la señora del señor licenciado don Rafael Sousa. En la noche se representó la comedia titulada: "El Tío Canillitas o el nuevo mundo en España". En este día hubo jubileo en el convento del Carmen.

J.18. En este día fue la octava del Corpus-Christi. En la tarde también hubo procesión en la villa de San Sebastián. En la noche se representó la comedia titulada: "Un avaro o el millonario de Guadalajara" y de sainete: "Ojo y Nariz don Bruno Chafarote y el pedicuro".

V.19. Jubileo en San Agustín y en el Sagrario. Hoy cantó misa el señor presbítero don Juan Ortega en el Colegio de San Nicolás quedando todo el día su majestad patente, después de la función. En la tarde hubo corpus. En la noche bautizó el señor presbítero don Antonio Mascorro al niño del señor licenciado Sousa y hubo baile.

S.20. Salves en San Agustín el Carmen, la Merced y el Santuario, habiendo en esta última Iglesia, rosario antes de la Salve.

D.21. Hoy hubo función en el convento de San Agustín en honor de San Luis Gon

%p20–Vildosola–2025–10–15%

zaga la cual es costeada por el Señor Don J.M. Longinos, La misa la dijo el R. P.F. Ramón Carranco y el sermón lo predico el señor canónigo don Antonio Mascorro. En la tarde trajeron a María Santísima del desierto para la santa Iglesia Catedral donde se le va a hacer un triduo. En la noche se representó la comedia titulada: "Subir del caldaso al trono o un embajador hechicero” (fue de magia). En este día en la mañana se casó en el convento del Carmen el señor don Crispín Gutiérrez Castillo con la señora doña Antonia Soberón. En la noche hubo baile en la casa del señor don francisco Manrique. En la mañana después de la misa que hubo en San Agustín quedó su majestad patente.

L.22. Hoy se empezó en Catedral el triduo a María Santísima de Guadalupe. En la noche hubo retreta con música en el cuartel del Carmen, y en el Teatro se repitió la comedia del día de ayer. Hoy está en el mesón de San Joaquín un nuevo animal que esta de venta, el cual tiene la rareza de tener, el cuerpo de elefante, los cuerpos de chivo, las patas de res, y el pelo de cochino. Cuyo animal se llama El Caraboa de África. Hoy parió la señora doña Dolores Sánchez esposa del señor don Pedro Landeta.

M.23. Hoy a las nueve de la mañana fueron tirados 25 cañonazos, los que fueron tirados en el Cuartel del Carmen, para enarbolar en la casa del Cónsul, el pabellón inglés. En la noche se representó en el teatro la comedia titulada: etcétera, juntamente con un nuevo mágico, el cual hace varias suertes. Dicho mágico es el señor Reinoldos.

Mes.24. Hoy hubo jubileo en el Convento de la Merced. En la noche se había de haber representado en el teatro varias suertes por el señor Reinoldos, y una pieza dramática por la compañía del señor Arias, titulada: "La familia improvisada". También una pieza de baile bailada, por la niña del señor Reinoldos, ejecutada otra de canto, por el señor Arias, pero como a la hora de costumbre no hubo entradas no se representó nada.

J.25. Hoy se comenzó otro triduo a María Santísima de Guadalupe del desierto (en la Iglesia Catedral).

V.26. En la noche hubo función de Teatro.

S.27. Salves en la tarde, en San Agustín, el Carmen, la Merced y el Santuario. Hoy llegó la compañía de ópera italiana. En este día hubo vísperas y maitines, en el Sagrario, donde estaba muy adornado por ser la función del Corpus de la Hermandad Nuestro Amo. Hoy apresaron a don Antonio Luna, editor responsable del perió

%p21–Vildosola–2025–10–15%

dico "La Razón" por haber impreso el manifiesto de Santa Anna.

D.28. Hoy hubo función en el Sagrario, habiendo dicho la misa el ilustrísimo señor Obispo. Por la tarde salió corpus de la misa Iglesia, y hubo vísperas en Catedral. En la noche hubo función de teatro. En este día se hicieron las elecciones para electores de los diputados para México.

L.29. Hoy hubo función en Catedral, en honor de San Pedro La misa la dijo el arcediano, el señor don Juan Gutiérrez, y el sermón el ilustrísimo señor Obispo. En la tarde hubo toros, donde presentaron el animal (Caraboa de África). También en la tarde bautizó el señor don Ramón Larrache y su señora a la niña de doña Dolores Sánchez. Por la noche hubo comedia en el teatro, y retreta en el Cuartel del Carmen.

M.30. En la tarde de este día fue llevada la Virgen del Desierto que estaba en Catedral al Colegio de San Nicolás, donde se le va a hacer un triduo, a costa de las Placeras.

Julio

Mes.1. Hoy comenzó con triduo a María Santísima de Guadalupe del Desierto en la Iglesia del Colegio de San Nicolás. Hoy se encargó de la prefectura el señor don J.M. Aranda, por haber renunciado el señor Faz con motivo de tener que salir fuera, por haber sido nombrado administrador de Guanamé. Hoy salió libre don Antonio Luna. Jubileo en Santiago y en el Sagrario.

J.2. Hoy hubo función en San Agustín, en honor de Nuestra Señora del Socorro, la misa la dijo el P.F.R. Carranco, y predicó el corista el P. Villa señor. También hubo jubileo. En este día salió a misa la señora doña Teresa Lambarri, habiendo sido la misa en Tercera Orden la dijo el R.P.F. Francisco Orozco. Hoy se supo que el señor Mejía había capitulado con el señor Rosas-Landa. Hoy volvió a desempeñar la secretaria del gobierno el señor licenciado don Antonio Ávila. Hoy en la noche se representó la primera pieza de ópera, titulada: "Hernani o el honor castellano".

V.3. Jubileo en San Agustín. En este día le concluyeron el triduo a la Santísima Virgen del Desierto que estaba en el Colegio de San Nicolás, habiéndola pasado en la tarde a la Villa de Santiago. Hoy se casó en la Villa de San Miguelito el señor don Jesús Santa-Ana (oficial) con la señora doña Tomasa Briones.

S.4. Jubileo en el Sagrario. En la capilla del Rosario hubo también función.

%p22–Vildosola–2025–10–15%

Hoy profesaron en la religión franciscana, los novicios el Padre Narváez y el Padre Torres. Hoy se dice que el señor Mejía se fugó después de los tratados que hizo con el señor Rosas-Landa.

D.5. En este día se instaló el Congreso del Estado, habiendo habido a las 11 de la mañana, cosa de 21 cañonazos, repicando en algunas Iglesias y tirando cohetes en los cuarteles, en los que también tocaron dianas. Cerca de la una salió música por las calles habiendo dado algunas vivas, los del pueblo. En este día dejo el empleo de consejero el señor don Betancourt Paz. En la tarde hubo música en el Santuario, y en la noche serenatas en el Cuartel del Carmen y en la Plaza de Armas, habiendo estado dichos puntos muy iluminados y con bastante concurrencia. En la noche hubo segunda función de ópera repitiendo la misma del jueves.

L.6. Hoy se reunió el Congreso para nombrar Gobernador, habiendo salido electo el señor don Anastasio Parrodi, y sustituto el señor don Eulalio Degollado. En este día tocaron dianas en los cuarteles, tiraron cohetes, y hubo música en la esquina de la casa del Señor Degollado. En la tarde hubo función de toros dedicada al Señor Gobernador.

M.7. Hoy tomó posesión del gobierno el señor don Eulalio Degollado luego que tomó posesión hubo música en su casa, y hubo algunos vivas por la plebe tirando algunos cohetes. En la noche hubo en el teatro función de ópera titulada: "Lucia de Lamermoor." En este día entregó el cargo de la secretaria del Gobierno el señor don Antonio Ávila. En este día se empezó el novenario en el Convento del Carmen a María Santísima, habiendo salido el convite en la tarde. Hoy dio el señor Degollado su proclama.

Mes.8. Hoy jubileo en el Convento de San Francisco, Sagrario y Villa de Tequisquiapan. En este día dejó el mando de coronel de la Guardia Nacional el señor don Betancourt Paz. Encargándose interinamente el señor licenciado don F. Villanueva. En este día dejo la prefectura el señor Aranda y se encargó de ella el señor don Francisco Nava. También se encargó en este día, de la secretaria de la prefectura, señor licenciado don José María Martínez, por haber renunciado el señor don José María García. En este día murió, la señora doña Josefa Salazar, tía del señor don Juan Vega. En la noche llego de México el señor don Genaro Dávalos.

J.9. En la noche hubo función de ópera titulada: "Nabuconosor Rey de Babilonia".

%p25–Vildosola–2025–10–15%

V.10. Hoy salió impreso que da el ilustrísimo señor Obispo para aclarar que el oficial don Jesús Santa-Anna que días pasados se casó, no es cierto que él dispuso se casara, sin la retractación del Juramento a la constitución, como lo dice el periódico "El liberal" a lo que el señor Obispo contesta, que ni aún aviso siquiera había tenido de dicho casamiento. En este día salió el señor Paz para la hacienda de Carranco.

S.11. Hoy en la noche, hubo función de ópera titulada: "Lucia de lammermoor."

D.12. En este día fue abierta una nueva pastelería francesa. En este día fue encontrado en un cuarto del Bazar, a don Juan Bastón (conocido bajo dicho apellido) el cual, se halló ahogado de vino, y echando sangre por boca y narices. En la tarde fue pasado al hospital. En la misma tarde asistió al ejercicio, que cada ocho días se hace, en el Cuartel del Carmen asistió el señor Gobernador. En la misma tarde fue pasada la Santísima Virgen del desierto que estaba en Santiago a la Villa de Tlaxcala. En la noche, hubo función de ópera a beneficio de una de las actrices representando la pieza titulada: "Lucrecia Borgia." Hoy jubileo en el Santuario de Guadalupe.

L.13. Hoy fueron las elecciones para Presidente de la República, saliendo por mayoría de votos el ciudadano don Ignacio Comonfort, y para Presiden de la suprema corte de justicia, el ciudadano don Ponciano Arriaga, por lo que tocaron dianas y tiraron cohetes. Hoy se mudó la librería que estaba en la tienda de la casa, que ocupa el señor don Genaro Dávalos, perteneciente dicha librería al señor don Mateo Rada; se mudó a los bajos del señor don Pedro San Juan. Hoy salieron nombrados diputados para México los siguientes: por el estado de San Luis el señor licenciado don Antonio Ávila, propietario, y suplente, el señor licenciado don Juan Manuel Aguirre; por Santa María del Rio, propietario, don Abraham Hernández y suplente don José María Murillo; por Mexquitic, propietario, don Pilar Bustamante, y suplente, don francisco Palomo, por el Venado, propietario, don Darío Reyes y suplente, licenciado don Luis Guzmán, por Cerritos, propietario, don Mariano Villalobos (Hijo) y suplente, don Carlos María Escobar; por el Armadillo, propietario don Tomás O. de Parada y suplente don José María Fernández Rincón; por Catorce propietaria, don Miguel María Ávila y suplente, don Darío Reyes.

%p24–Vildosola–2025–10–15%

M.14. En la mañana de hoy pasó el señor San Miguel de su villa, para el Convento del Carmen, el cual iba en procesión y con música. Hoy murió la hija de don Emeterio Sosa. Hoy llegó el señor don Luis Valcallo con su señora la cual vino a curarse.

Mes.15. En la mañana de hoy salió la madrugada del Convento del Carmen, habiendo habido repiques y música, por la tarde, hubo en el mismo Convento del Carmen vísperas y en la noche maitines, y serenata en la plazuela, donde también había árboles de cohetes. También en este mismo día, cerca de las 12 de la mañana, pasaron las flores con la Santísima Virgen, la que salió de la casa de las señoras Bustamante, que es en donde la traen a vestir. Hoy jubileo en el Colegio de San Nicolás.

J.16. En este día hubo jubileo en el Convento del Carmen, habiendo habido muy buena función por ser el día de la Santísima Virgen. La misa la dijo el M.R.P. guardián de San Francisco, el P.F. Francisco Orozco y el sermón lo dijo el señor canónigo Ledón. En la misa cantaron las actrices de la ópera italiana, habiendo asistido a la función el ilustrísimo señor Obispo. En la tarde hubo corpus habiendo estado muy concurrido. Hoy se perdieron cuatro hilos de perlas, a una de las niñas que iban vestidas de almas gloriosas. Hoy apresaron al señor don Cayetano Garaña, por no haber querido entregar las llaves de una casa a un adjudicarlo. En este día el señor don Luis Gascon de la Villa de San Francisco se ofrece, por medio de una atenta comunicación al señor Gobernador, para que se le permita ser uno de los primeros que tengan que salir, a combatir a las fuerzas españolas. Hoy en la noche hubo función de ópera titulada: "Lucia de Lammermoor."

V.17. Hoy llego el Señor Paz de la hacienda de Carranco. En este día empezó el octavario del Convento del Carmen. Hoy se repartieron unos avisos, diciendo que en la peluquería del señor Aguer, se halla una persona inteligente para peinar, a las señoras de un modo muy bonito y enseñará a las que quisieran, por precios cómodos.

L.18. En este día murió repentinamente un oficial del batallón de los de Guanajuato. En la noche hubo función de ópera titulada: "La Sonámbula". En este día fue nombrado fiscal de imprenta, el señor don Ramón F. Gamarra. Hoy salió por la tarde en San Agustín, el Carmen, la Merced, y el Santuario.

%p25–Vildosola–2025–10–15%

D.19. Hoy jubileo en el Convento de San Agustín y en el Sagrario. Hoy se ofrece al público el señor don Francisco Figueroa, para fabricar toda clase de fuegos artificiales. Hoy son citados todos los ciudadanos, para que en la tarde se presenten al Cuartel del Carmen, con el objeto de formar un batallón para que, en caso de haber la guerra con España, salir a atacarlos. En la tarde hubo función de Toros, y en la noche función de ópera titulada “El Trovador”, siendo a beneficio del señor Barili.

L.20. En este día la junta patriótica de esta capital nombro a los oradores, para los días 16, 17 de septiembre en ella junta la componen los señores siguientes: don Eulalio Degollado, gobernador del estado; presidente; el señor licenciado don Vicente Chico Sein, vicepresidente, vocales, el señor comandante general don Mariano Morett, el señor diputado don Manuel Terrazas, el licenciado don Pablo R. Gordoa, secretario, el señor don José María García, oradores para el 15 de setiembre en la noche, el señor don Ambrosio Salazar, para el 16 el señor licenciado don Juan B. Barragán, para el 27 el señor licenciado don Fortunato Nava, para el sermón del día 16 el M.R.P. prior del Convento de San Agustín F.J. María Marín, para el 17 el señor presbítero don Mariano Saldaña y para el 28 el M.R.P.F. Cipriano Quintero. En este dispuso el señor gobernador el establecer una junta de fomento, por orden del señor ministro; para que se forme lo más pronto, son nombrados vocales los señores don Florencio Cabrera, don Rafael Vega, don Irineo Gavia y don Ramón F. Gamarra. Hoy también fue nombrado vocal de la junta directiva del Hospital de pobres de San Juan de Dios, el señor don Marciano Hernández, por el fallecimiento del señor don Antonio Rodríguez Fernández.

M.21. Hoy se retractó del juramento hecho a la constitución el señor don Juan Herrera. En este día fue cateado el rancho del señor general Pavón. En la noche hubo función de ópera titulada: "I Masnadieri."

Mes. 22. Hoy pasó el señor gobernador al presidente del excelentísimo Ayuntamiento, una comunicación para que coopere esta corporación, a que se establezca una biblioteca pública para la instrucción popular. Hoy salió el Cuarto Regimiento de Caballería para México, y conducen presos a los señores don Crescencio Contreras y don Rafael Días de León. Hoy se estrenó una esquila en la torre de San Miguelito y fue su bendición, habiendo habido repiques y cohetes. Hoy salió libre el señor don Cayetano Garaña.

%p26–Vildosola–2025–10–15%

J.23. Hoy por renuncia que hizo al señor don Ambrosio Salazar de pronunciar la oración del 15 de septiembre en la noche, ha sido nombrado para dicho acto, el señor don Cipriano Martínez. En este día parió la señora López, es posa del señor don Francisco Camacho. En la tarde de hoy, trajeron a María Santísima de Guadalupe del desierto, de la villa de Tlaxcala, a la de San Miguelito. En la noche hubo función de ópera titulada “I. Masnadieri”. En esta misma noche hubo serenata en la plazuela de San Miguelito.

V.24. Hoy jubileo en el Convento de la Merced. En este día parió Severiana. Hoy numeraron las casas.

S.25. Hoy es nombrado secretario de gobierno el señor don Ramón F. Gamarra. En la noche murió el señor cura de San Sebastián el presbítero don N. Navarrete. En la noche hubo maitines en la Villa de Santiago, habiendo habido muy buenos fuegos, hechos por una de las actrices de la ópera. Hoy en la tarde salves en San Agustín, el Carmen, la Merced y el Santuario.

D.26. Hoy hubo función en la Villa de Santiago, y en la tarde Corpus. En la noche hubo función de ópera, siendo a beneficio de la actriz doña Constanza Manzini, poniendo en escena la pieza titulada: "El barbero de Sevilla". En este día se ofrece al público como escribano público nacional, el señor don Fermín Miranda.

L.27. Hoy fue llevada en procesión a María Santísima de Guadalupe del Desierto de la Villa de San Miguelito, a la de Tequisquiapan habiéndole cantado salve en el Convento de San Francisco. Hoy por orden del señor gobernador fue disuelta la junta Lancasteriana que la componían más de cincuenta individuos, para formar una nueva que la componen los señores Siguientes: don Francisco Macías, don J. María García y el presbítero don Mariano Saldaña. Tesorero el señor don Juan Viramontes. Hoy en la noche hubo función de ópera.

M.28. Hoy se bautizó el niño de Severiana siendo padrinos de brazos mi Papá y Mamá, y de óleos, el presbítero don Luis Arias, habiéndole puesto el nombre de Buenaventura. En este dio orden el señor gobernador pasa que los señores abogados y escribanos, que se presenten a juicio y

%p27–Vildosola–2025–10–15%

que no hallan jurado la constitución, no se les puede formar, juicio ni tampoco despachar. En este día se sabe que el señor don Juan Othón, ha sido prendidos en Querétaro y que se le conduce para esta capital. también se dice que don Francisco Alemán y otros han sido presados por el motín de Rioverde, y que también se les conduce para esta capital. Hoy da un aviso el señor Don Antonio Hernández en que dice que en el término de dos meses ha vacunado a 337 individuos. En la noche hubo función de ópera.

Mes.29. Hoy dispuso el Gobernador se armen 30 hombres para la Guardia Nacional y además de estos, otros 400 hombres. también en este día se encarga a la policía que conduzcan a todos los pobres al Hospicio.

J.30. Hoy se le paso al señor Paz una comunicación del gobierno, para que entregue la dirección del Hospital de Pobres de San Juan de Dios al señor don Antonio Hernández. Hoy en la noche fue el señor prefecto a la casa del P. Prior de San Agustín F.J.M. Marín, a sacar a una sobrina de dicho padre, la cual se va a casar con un sastre. La sacaron porque el padre no quiso dar su consentimiento.

V.31. Hoy entrega la dirección del Hospital el señor Paz al señor Hernández. Hoy por ser día del cumpleaños del señor Presidente de la República, hubo música y salva a la madrugada. En la tarde se cerró el comercio y salió un carro muy adornado con el retrato del señor Comonfort, cuyo carro fue al Santuario llevando música, la que estuvo tocando hasta la oración. En la noche, hubo serenatas en la plaza y cuartel del Carmen estando muy adornado ambos puntos, y en la plaza hubo fuegos. En la misma noche hubo en el Teatro función de ópera.

Agosto

S.1. Hoy se ha nombrado fiscal de imprenta al señor don Cipriano Martínez. Hoy jubileo en Santiago, Sagrario y en el Convento de San Francisco en cuya Iglesia descubría su Majestad a las dos de la tarde por ser el júbilo de porciúncula. Hoy se fijaron unos avisos para que se cierren las tiendas todos los domingos, para que se presten todos los ciudada

%p28–Vildosola–2025–10–15%

nos, al ejercicio que se hace en el Cuartel del Carmen. Hoy comenzaron los exámenes en el Seminario Conciliar.

D.2. En este día hubo función en el Convento de San Francisco, por el jubileo de porciúncula. En la tarde hubo función de toros, a beneficio del Santuario de Nuestra Señora de Guadalupe. En la noche, hubo función de ópera a beneficio del empresario don Andrés Mansini, representando la ópera titulada: "Juana de Arco o sea la Virgen de Orleans". En la misma noche, se empezaron los exámenes de la cátedra de física, en el Seminario examinándose el señor don J.M. Becerra. Siendo replicas, el Presbítero Don J. M. Sánchez Gutiérrez y el presbítero don Pedro Gaitán; además de estos señores el catedrático de dicha catedra el presbítero don Telésforo Macías. Hoy llego de México el señor don Santiago Vidaurri.

L.3. Jubileo en el Convento de San Agustín. Hoy por orden de la prefectura se manda que se presenten todos los ciudadanos exceptuados de la Guardia Nacional, el que se presenten, para registrar sus excepciones. En la tarde de hoy, murió repentinamente la esposa del señor Don Mariano Vega. En la tarde de hoy elevaron a María Santísima de Guadalupe del Desierto, que estaba en Tequisquiapan, la llevaron para el Desierto. En la noche se examinaron en el seminario los señores don Joaquín Villalobos y don Domingo Arriola.

M.4. Jubileo en el Sagrario. Hoy salió para Monterrey el señor Vidaurri. Hoy hubo acto público en el Santuario conciliar sustentado por el señor don Cenobio Mendoza, (cursante de Teología). En la noche hubo función de ópera a beneficio de los esposos el señor Belini y la señora Garofali, la ópera es titulada: "El Belisario". Siendo la última función que dan las actrices de la ópera, en esta capital. Hoy al salir del Teatro, segó la hija más chica del señor don J.M. Aguirre.

Mes.5. Hoy es nombrado el señor don Francisco Bustamante, para que tomara empleo de contribuciones directas, por repararlo el gobierno al señor don Luis Legorreta. El C. Don Telésforo Sustaita fue nombrado segundo jefe.

J.6. Hoy se ofrecen al público como retratistas los señores don Carlos Rand y don O. B. Curtis para hacer retratos por el nuevo método del ambrotipo En este día, pone el R.P.F. Antonio Mata (vicario de la villa de San

%p29–Vildosola–2025–10–15%

Miguelito) un comunicado en el periódico "La Razón" en el que manifiesta, que contrayentes del matrimonio los señores don Jesús Santa Ana y la señora doña Tomasa Briones, de que habla el periódico "El liberal" diciendo que el señor Santa Ana se casó sin la retractación del juramento hecho a la constitución de 1857, a lo que contesta el padre Mata, que se casaron ciertamente, pero que en todo obro maldad, pues le llevó una boleta de confesión y se le presentó en clase de paisano, y no de militar como lo es; por lo que ignorando el todo, los caso; pero ahora que ha visto lo que hay sobre el particular, pone dicho comunicado para declarar nulo el casamiento, pues en todo entró engaño. También el señor don Francisco Alemán, que se encuentra preso en esta capital por negocios políticos, pone un comunicado el cual tiene por objeto, el dar las gracias a varias personas que se interesaron para que lo tuvieran preso en otro lugar y no en la cárcel pública donde está. También da las gracias a varias personas que, en la tercena de la Diana, contribuyeron para darles de comer al señor Alemán y otros, presos por la misma causa que él. En este día, se fueron los señores que componen la compañía, de la ópera italiana, a excepción del señor Manzini, su esposa, y otros dos. En este día, hubo acto público en Seminario, sustentado por don Miguel Villalobos (cursante de derecho). Hoy hubo junta de médicos, para ver a la niña del señor don José María Aguirre, dejando de asistir por haberse negado según dicen, el señor don Tomás O. de Parada.

V. 7. En la noche de este día presaron al P.F. Antonio Medellín (vicario de la Villa de Santiago) por creer que tenía gente reunida, dispuesta para pronunciamiento o cosa semejante, esto lo pensaron porque vieron salir del curato de dicha villa a varios hombres a caballo y armados, los cuales iban a encontrar a la familia del padre, que venía de fuera. También apresaron en la misma noche al señor don J.M. Hernández y su esposa y su hijo, a las cuales los tuvieron en compañía del padre Medellín, presos en el Cuartel del Carmen. En este día trajeron preso por negocios políticos, al padre Yáñez (cura de Nuevo Gamotes), el cual lo pusieron en el Convento de San Francisco.

S.8. Hoy jubilo en el Sagrario, Convento de San Francisco y villa de

%p30–Vildosola–2025–10–15%

Tequisquiapan. También en la misma mañana, hubo acto público sustentado por don Francisco Anaya (cursante de la cátedra de mayores) y en la tarde hubo otro sustentado por don Francisco Gaytán (cursante de la catedra de lógica) En este día salió en el periódico "La Razón", un comunicado puesto por el señor don J.M. Monjarás; el cual, tiene por objeto el dar noticia que tiene contratada la fábrica de la Diana y que de la utilidad que sobra, paga la tienda en que tienda en que tiene su tercena, lo dice, porque sabe que andan algunas personas, indagando de dónde, cómo, o quién, es el [que] paga la tienda. También el señor licenciado don Crescencio Gordoa pone otro comunicado, en que dice no es cierto la adjudicación de una casa del Hospicio de Pobres.

D.9. Hoy hubo acto público en el Seminario sustentado por don Manuel Pereira (cursante de física). En la noche hubo, concierto en el teatro cantando el Señor Manzini y su esposa. En esta misma noche salieron a rondar varias patrullas por haber alarma. Hoy salió libre el presbítero Medellín, y don J.M. Hernández. Hoy al bajar de una carretela se cayó y se golpeó, la esposa del señor licenciado Sousa.

L.10. Hoy me examiné de toda filosofia.

M.11. Hoy renunció el empleo de Secretario de la prefectura, el licenciado don J.M. Martínez, habiéndose encargado de dicho empleo, el señor don Cipriano Martínez. Hoy se dice que el señor Morett, tuvo una incomodidad con el ilustrísimo señor Obispo con respecto al casamiento de su sobrino, sin la retractación del juramento hecho a la constitución, de 1857.

Mes.12. Jubileo en el Santuario. Hoy dedicó unos versos a los potosinos, el hijo del señor Adanto. En este día se encargó del empleo de defensor de pobres, el señor Alvarado, por haber dejado dicho empleo el señor don Cipriano Martínez. En este día hubo acto público en el Seminario sustentado por don Enrique Staines (cursante de medianos y mayores).

V.14. Hoy hubo acto público en el Seminario sustentado por don Anastasio Figueroa (cursante de filosofía.) En este día salió para el Peñasco, el R.P. guardián de Francisco en compañía de dos padres. Hoy es nombrado Vicecónsul americano Doctor Piernás.

S.15. Hoy jubileo en el Colegio de San Nicolás. En la tarde salves en San Agustín, el Carmen, la Merced, y en el Santuario.

D.16. Jubileo en el Con-
