# Supplementary material for: A Methodological Framework for the Use of AI Tools in Automated Workflows for Generating Validated and Structured Historical Datasets
Source: Research Square preprint supplement (doi:10.21203/rs.3.rs-7943432/v1), 2025-11-17
Supplement: Supplementary file 29 [file DIARIO_DE_MANUEL_VALDES_OCR_GT(P19-P48).docx]

%p19–Valdes–2025–10–15%

DIARIO DEL CORONEL VALDES

“Fué hecho prisionero por el General Don Domingo Cajén, del ejército reaccionario en 1860 y fusilado en Duro, en Octubre del mismo año. Yo mandé copiar este diario del original, pues traté con el Col. V.—Agto. 7.”

FEBRERO 1.º DE 1858.—Pernoctamos en San Juan de Vanegas, y llegó uno de los oficiales del Coronel Zuazua que salió de Matehuala. Las avanzadas del ejército del Norte llegan a Bocas cerca de San Luis. Esta noche acordó el señor Vidaurri que pasara yo a Catorce de interventor de la Aduana, las rentas del tabaco, etc. También para agenciar un préstamo de veinticinco mil pesos. Sin recursos nada se hará, y haré lo posible para desempeñar tan importante comisión de una manera satisfactoria.

DÍA 2.—Salió el Sr. Vidaurri de Vanegas y hoy llegué a Catorce. Presenté las comunicaciones al Administrador de Rentas y al Alcalde.—Estos señores se muestran muy inclinados a favorecer al Sr. Vidaurri y obsequiar sus deseos. Mañana haré reconocimiento de sus libros y veré cuánto dinero se puede de pronto sacar para las urgencias del ejército del Norte. Es menester firmeza, energía y actividad en la ejecución de las órdenes que tengo del Sr. Vidaurri. Es muy honroso el nombramiento que me ha conferido.

DIA 3.—Me vino a ver el señor Administrador de la Aduana D. Juan Durán, que es sin duda hombre muy honrado, se—.

© Biblioteca Nacional de España

%p20–Valdes–2025–10–15%

2 DIARIO DEL CORONEL VALDES

gún lo que de buen origen he sabido. Examiné el Corte de Caja de la Aduana, y no hay de existencia sino unos quinientos pesos del mes próximo pasado Enero. Escribí al señor Vidaurri, y con fecha de hoy libró este señor por $500 contra la Administración de Catorce a diez días de vista. El préstamo de $25,000 se comenzó a recaudar hoy, y se dificulta por razón de no haber venido las conductas, ha más de tres meses. Se nota la mejor disposición para facilitar el dinero, lo que alegan tocante a la mucha escasez de dinero, es sin duda efectivo. He logrado convencer a varios que con facilitar la cantidad que se les exige lo hacen en beneficio de la población entera.

DIA 4.—Recibí carta del Sr. Vidaurri para que en dinero, plata, pasta y libranzas lleve todo lo que se haya recibido del préstamo de los $25,000. Se llevarán también dos mil pares de zapatos y mil jorongos. La población simpatiza mucho con el Sr. Vidaurri y con los principios que profesa. —Saldré tan luego como pueda arreglar todo de manera que el préstamo se haga efectivo.

DIA 5.—Esta tarde llegaron los que de esta ciudad pasaron a Matehuala para ver al Sr. Vidaurri. La Junta para reformar las cuotas asignadas para el préstamo, nada definitivo arregló, pero mañana según me asegura, quedará todo arreglado, de una manera satisfactoria y en términos que el préstamo se haga efectivo en los términos que el Sr. Vidaurri me lo previene en su carta de ayer.—Escribí al Sr. Vidaurri y este señor salió esta mañana de Matehuala.

DIA 6.—Sin embargo de los esfuerzos del Sr. Avila y míos muchos alegan que no pueden exhibir las cuotas que se les asignaron, y se resuelven a marchar al cuartel general para hablar con el Sr. Vidaurri. A las nueve y media salí del Juzgado y se gastó todo el día en recaudar todo lo posible.

© Biblioteca Nacional de España 3

%p21–Valdes–2025–10–15%

MEMORIAS DE LA GUERRA DE REFORMA

en numerario. Mañana a las siete nos volveremos a reunir para tomar medidas definitivas sobre lo que falta para efectuar el préstamo.

DIA 7.—Se gastó el día en arreglar tanto que quedó ayer pendiente. Se recibió libranza por tres mil pesos girada por D. José María Luna, contra los fondos del préstamo.— Mañana es preciso acabar de arreglar todo para alcanzar al Sr. Vidaurri pasado mañana.

DIA 8.—Salí de Catorce, acompañándome D. Agustín Antonio Aguilar que me acompaña para ver al Sr. Vidaurri. Llevo calzado y jorongos para el ejército, dejando todo arreglado para el pago de la libranza de tres mil pesos girada por el pagador del ejército. En Catorce dejé al Administrador de la Aduana instrucciones para que mientras las plazas de San Luis estén ocupadas militarmente por el señor Vidaurri, no se obedezcan otras órdenes sino las que emanen de este señor.—Pernoctamos en las Carretas.

DÍA 9.—Se hizo jornada a Guadalupe el Carnicero, cuyo Administrador D. Julián Martínez nos trató con la mayor urbanidad.

DÍA 10.—Llegamos a los Charcos donde me encontré con el Dr. W. W. Bauts, Cónsul Americano en Aguascalientes. Ayer salió el Sr. Vidaurri del Venado y Calvo con Osollos y pandilla fueron derrotados por las fuerzas de Parrodi en el Cerro de Magdalena.—Osollos perdió un brazo en la acción.

DÍA 11.—Salimos con mucho frío de los Charcos y llegamos para medio día al Venado. Aquí recibí del Prefecto los cuatro tercios de jorongos que habían sido remitidos por el Presidente de Catorce.—Se perdió el día en agenciar fleteros. El ejército habrá llegado a San Luis.

© Biblioteca Nacional de España

%p22–Valdes–2025–10–15%

4 DIARIO DEL CORONEL VALDES

DIA 12—Llegamos al (Bocas) Huizache cerca de Bocas. Antier, cerca de las doce de la noche, salieron las fuerzas de Bocas y ayer llegaron a San Luis.— Recibí del cuartel general orden para que se regresara D. Agustín Antona Aguilar a Catorce. En la Hedionda puse oficio al Prefecto de Venado para que a precios de plaza recibiera jorongos a D. Loreto Reyes de Aguilar para el uso del ejército. La carga me detiene.

DIA 13.—Llegamos a San Luis Potosí. El 11 del corriente, a las dos de la mañana, salió el ejército de Bocas, y el 12 a las tres de la tarde se aproximó a San Luis. Los pronunciados bajo las órdenes de Alfaro, Otón y otros, ocupaban la plaza que estaba completamente fortificada con artillería, trincheras y parapetos sobre las azoteas de las casas principales. Las avanzadas del ejército del Norte comenzaron tan luego como llegaron, los fuegos, y a poco rato les quitaron tres de las posiciones al enemigo. Entró la noche y el fuego continuó hasta la una de la mañana, que se rindió la plaza. Alfaro, Otón y otros treinta de su oficialidad se ocultaron, pero el día 12 fueron aprehendidos, y ahora están presos mientras el Gobierno dispone de ellos.— El 12 se recibió Aguirre otra vez del Gobierno y hoy expidió el Sr. Vidaurri sus proclamas al ejército y a los potosinos. — Toda la fuerza se portó muy bien, pero particularmente los de Santa Rosa y demás pueblos de la frontera de Coahuila. El peladaje no dejó de hacer bastantes robos, y para evitar esto se han puesto patrullas de día y de noche. Los potosinos por cierto no están a gusto con Aguirre a quien parece que le tienen el mayor odio. —La ciudad está tranquila y de nuevo se disfruta seguridad.

DIA 14.—Se comenzó a quitar las fortificaciones de las calles y recogerse la artillería y demás pertrechos de guerra que perdieron los pronunciados. Visité la iglesia de la Compañía de Jesús y me llamó la atención el crecido número de.

© Biblioteca Nacional de España

%p23–Valdes–2025–10–15%

MEMORIAS DE LA GUERRA DE REFORMA 5

padres y frailes que en ella encontré. Si la religiosidad de los mexicanos fuera en proporción al número de clérigos que mantienen, sería México el país por excelencia más cristiano en el mundo. No puede progresar una sociedad que mantiene en su seno tanta ociosidad.

DIA 15—Llegó el Coronel Blanco esta tarde con cien hombres de la frontera de Coahuila. —Recibí carta del Coronel Castillo Montero que se ha mudado a Monterrey, en consecuencia a los matamorenses. —La función de toros que hoy se dedicó a D. Santiago y a la oficialidad del ejército del Norte, estuvo muy concurrida. —Es diversión bárbara que entre otras lindezas hemos heredado de los españoles. —Visité varios templos, y el del Carmen (convento), es un edificio suntuoso. La ciudad presenta la mayor actividad, y apenas se habla de los desastres causados por los acontecimientos a que dieron lugar el pronunciamiento de los fueristas y religionarios. Tan acostumbrado está ya el pueblo a ver que los mayores crímenes se cometen con impunidad. —En México sobran Catilinas y faltan Cicerones. —Si el pueblo llegara a comprender la magnitud de los ultrajes que se le hacen, terribles serán sus venganzas.

DIA 16—Llegó la noticia de haberse publicado la Constitución e indulto general para los revolucionarios. Todos pueden de nuevo conspirar contra la República sin tener ningún castigo. ¡Viva el crimen! ¡Viva la traición contra las libertades públicas!!—Escribí a los Estados Unidos y al Lic. Castillo Montero, remitiéndole cartas de recomendación para el Lic. Garza Melo y D. Miguel Nieto, de Monterrey —Despaché hasta ésta las de Espinosa en busca de mi equipaje. Mucho temo que el conductor se lo haya robado.

DIA 17—Asesinaron los prelados a un soldado de los nuestros y continuarán haciéndolo, si no se toman providencias para evitarlo —Escribí a México tocante al Consulado.

© Biblioteca Nacional de España

%p24–Valdes–2025–10–15%

6 DIARIO DEL CORONEL VALDES

de Brownsville.—Nada de mi equipaje y mucho temo que se lo robó el conductor y me queda lo encapillado.

DIA 18.—Nada de nuevo y ni noticias de mi equipaje. —La ciudad está quieta y es increíble el número de prelados y vagos que observa uno en las plazas y calles. Mientras tengamos tanta ociosidad, no será difícil trastornar la tranquilidad de los pueblos. —Salió Santa Cruz con su escuadrón y la conducta para Monterrey. Santa Cruz va a Aguanueva.

DIA 19.—Con bastantes ansias se aguardaron correos de México y Monterrey. Nada de noticias y se dice que pronto llegará el General Parrodi con su mochería. No harán buenas migas con los nuestros.

DIA 20.—Llegó extraordinario de Monterrey y recibí carta de Jovita B. de Mejía, para que me empeñe con el Sr. Vidaurri, por sus hermanos Pancho y Rafael. —Se recibió noticia del nombramiento de Gobernador de Nuevo León y Coahuila que se hizo en la persona de D. Santiago Vidaurri; mejor nombramiento no se podía haber hecho y por cierto que lo merece este benemérito ciudadano. La noticia se recibió aquí con el mayor entusiasmo, hubo repiques, felicitaciones, etc. En la noche toda la oficialidad y un gran número de particulares de esta ciudad, pasaron con una banda de música a la casa del general, y a las diez y media me vine a recoger. Llegó mi equipaje y doy gracias a Dios. En la tarde visité la Calzada y el Santuario. Vi el punto donde asesinaron al Gobernador de este Estado, D. Julián de los Reyes.

DIA 21.—El comercio facilita recursos voluntariamente para el sostén de las fuerzas del ejército del Norte. Esto lo hace sin embargo de los esfuerzos del Gobernador D. José María Aguirre para evitarlo. Este hombre malo y perezoso había dado órdenes antes de nuestra llegada a esta plaza para que en los pueblos del tránsito no se nos facilitaran.

© Biblioteca Nacional de España

%p25–Valdes–2025–10–15%

MEMORIAS DE LA GUERRA DE REFORMA 7

recursos, y para que se opusieran con la fuerza si era posible. No en vano le dicen a este criminal en Coahuila Picaluga y sólo el ciego espíritu de Partido podía haberle dado el nombramiento de Gobernador de un Estado a semejante…

Recibí carta del Administrador de la Aduana de Catorce, D. Juan Durán. La contestaré el lunes. —Todo está quieto, y por todos lados se oyen maldiciones contra Aguirre. El Presidente hace muy mal con no remover a este hombre tan odiado de la población.

DIA 22—La función de toros dedicada al ejército del Norte, estuvo muy concurrida y esta noche comienzan los bailes de máscaras. Se dificultan recursos para las fuerzas, gracias al empeño del Gobernador Aguirre para evitar que el comercio de esta ciudad facilite las sumas que se necesiten. Este gobernadorzuelo se vería ahora prófugo y sin destino, si no fuera por las fuerzas de Nuevo León y Coahuila, pero ni aun la gratitud, ni lo que exige la (situación) de seguridad de esta población de esclavos, hace prescindir a este perverso de las enconosas miras que abriga contra el Sr. Vidaurri. Sería mejor para la patria si semejantes pícaros perecieran en un patíbulo.

DIA 23—Escribí a D. Juan Durán, de Catorce, y a Tonchita Narragán. Escribí también a los Estados Unidos. Fui al baile de máscaras y estuvo bien indiferente. El comercio ha quedado de facilitar recursos para el ejército, sin embargo de los empeños de Aguirre para evitarlo. Mucho es lo que se quejan todas las clases aquí de este hombre perezoso y malvado.

DIA 24.—Las funciones de los toritos, han salido hoy como ayer, por todas las calles, y el gran número de vagos que los siguen indican la ociosidad de las masas.

DIA 25.—Nada de nuevo y el comercio facilitó treinta y cinco mil pesos para socorrer las fuerzas. Mucho sienten.

© Biblioteca Nacional de España

%p26–Valdes–2025–10–15%

8 DIARIO DEL CORONEL VALDES

los potosinos que nos vayamos, y temen otro movimiento revolucionario después de nuestra salida de aquí. —El baile de máscaras en el Coliseo estuvo muy concurrido y elegante.

DIA 26.—Salió Indalecio Vidaurri para Monterrey, y con Ceballos, les envié periódicos a Tonchita Barragán y a las niñas Nieto. El Gobernador Aguirre dió orden a las autoridades de Catorce, para que los préstamos hechos al ejército del Norte, los paguen de su bolsillo. Esto ha exaltado mucho los ánimos, y no causaría asombro si antes de nuestra salida de aquí se hace una diablura con Aguirre.— Se dió orden para que mañana toda la fuerza ocurra a la misa y Tedeum que se celebrará en el Santuario de Guadalupe —El Obispo oficiará.

DIA 27.—Gran función de iglesia en el Santuario de Guadalupe.—Toda la fuerza armada concurrió, y el sermón del Reverendo Fraile no fué sino un discurso político—Nada de nuevo y todos preparándonos para salir de ésta con dirección a nuestra querida frontera—Llama la atención de todos el crecido número de frailes, prelados y pu...—Llegó D. Fernando Garza y el Lic. Verea, de Monterrey.—Estoy algo enfermo.

DIA 28.—Nada de Correo de Nuevo León y Coahuila, gracias al señor administrador del Saltillo.—Llegó Rivas, de Monterrey, con sus carros.—Se dió orden de marcha al 2.º regimiento.—Mañana saldrán.—Los potosinos lamentan la salida del ejército del Norte, y el único que se alegrará de ello será el Gobernador.—No hay duda que la venida de las fuerzas de Nuevo León y Coahuila, salvaron a esta hermosa ciudad.

Marzo 1.º Salió el 2º Regimiento para Nuevo León y Coahuila.—No llegó el Correo ordinario del Saltillo y Monterrey. —Grandes bailes de máscaras en el Coliseo y en la Lonja.—No fuí a ninguno, pero supongo, por lo que me di-.

© Biblioteca Nacional de España

%p27–Valdes–2025–10–15%

MEMORIAS DE LA GUERRA DE REFORMA 9

cen, que el de la Lonja estaría muy elegante—La corrida de toros estuvo muy divertida, y los toros salvaron la valla.

DIA 2—Nada de Correo del Saltillo —El Gobierno General dispone que los cabecillas Oton y Alfaro, sean entregados al Juez de Distrito para ser juzgados conforme a la última ley de conspiradores.—Morirían, si esta ley se hiciese efectiva contra ellos—El Sr. Vidaurri puso oficio al Juez de Distrito, poniéndolos a su disposición—Los demás oficiales prisioneros serán remitidos a México—Casi todos desean irse con nosotros, pero se les contesta que no hay orden del Gobierno para hacerlo.—Se corre la voz que Garza y García se han pronunciado contra el nuevo Gobernador y Comandante General Moreno, nombrado por Comonfort, según el Estatuto Orgánico.—¡Pobre Tamaulipas!—En qué manos habéis caído.

DIA 3.—Los oficiales que se llevan prisioneros hoy dieron su palabra de honor, que pasarán a México, según lo dispuesto por el Gobierno General.—Oton y Alfaro serán juzgados aquí—Los más de estos oficiales son jóvenes pataratos que sin saber lo que hacían se metieron en una revolución con objeto de medrar—La certidumbre de no ser castigados es el secreto de que tengamos tanto revolucionario en México—Mañana da el Sr. Vidaurri un baile a las familias de esta ciudad, para corresponder al cariño que le han demostrado a él y al ejército del Norte.—Pasado mañana saldremos.

DIA 4—Gran baile esta noche en el Coliseo.—Se dio orden de marcha al 3er. Regimiento para que salga mañana. —El Coronel Lama, ex-segundo en Jefe de los pronunciados en esta plaza, nos acompaña a Monterrey. —Varias familias se trasladan también de aquí a Nuevo León.

DIA 5.—Anoche llegó extraordinario de México con orden para que las fuerzas del Norte continúen ocupando la plaza.

© Biblioteca Nacional de España

%p28–Valdes–2025–10–15%

10 DIARIO DEL CORONEL VALDES.

mientras llega el General Moret con la fuerza que la deba cubrir. —Se dio contraorden de marcha. —Llegaron ayer tarde los Diputados Hano y Garza Melo, como también el Licenciado Coronado. —Escribí a mi hermano Timoteo que está en el Saltillo. —El baile de anoche estuvo muy elegante y concurrido. —El Gobernador Aguirre hizo las paces con el Sr. Vidaurri, y pretende que en lo sucesivo sean amigos. ¡Quién sabe!...

DIA 6. —Rivas sale mañana para Monterrey con parque, balas de cañón, etc. —Nada absolutamente de nuevo, si no es el alboroto de muchas familias que se quieren ir a la frontera, y a quienes el Sr. Vidaurri facilita carros, etc., para que se trasladen. —Salieron los Diputados de Nuevo León para Monterrey.

DIA 7. —Anoche, la patrulla mató a un Alcalde de esta ciudad por equívoco, e hirió a unos 7 otros. —Es lamentable esta ocurrencia. —Escribí a Daniel, Don Braynares y a Panchita Zambrán. —Nada de nuevo en México.

DIA 8. —Concierto y comedia dedicados al Sr. Vidaurri, a los jefes, oficiales y tropa del ejército del Norte. —Se dió orden para que todas las familias que van para Monterrey en los carros, estén listas para pasado mañana, el 10. —El Gobierno General dió el grado de General al Coronel Rivera por los servicios que prestó en la toma de San Luis. —Iguales servicios hubiera prestado, si se hubiera hallado en la Capital de México. —El Sr. Rivera nada tuvo que ver con la toma de esta plaza por el Ejército del Norte.

DIA 9. —El concierto de anoche estuvo regular, pero el teatro, la comedia y los bárbaros que la quisieron representar, todo estuvo de los diablos. —Los disparates de los actores, y la crítica atrozmente vulgar de muchos, fue lo que más llama la atención. —Salió Rivas con sus carros cargados de parque, etc. —Escribí a Texas, Orleans y Nueva.

© Biblioteca Nacional de España

%p29–Valdes–2025–10–15%

MEMORIAS DE LA GUERRA DE REFORMA 11

York. Di libranzas en favor de Juan Clark por $100, contra “El Galveston News” y de $50 contra “El Times” de la Capital de Austin.

DIA 10.—Se dio orden de marcha y mañana salimos, gracias a Dios. —En una refriega entre el peladaje y las tropas de Rivera hubo 26 heridos, entre ellos 3 mujeres.— El Gobierno General ha obrado cochinamente con toda esta fuerza, y no ha sabido agradecer los sacrificios hechos por Nuevo León y Coahuila en favor de las instituciones federales y particularmente de esta ciudad que logró salvar. La verdad desnuda es, que en el actual Gobierno no se puede poner fe, y muchos de sus actos públicos se pueden citar para probar que no será nunca nuestro amigo. El nombramiento que para el Ministerio de Hacienda, acaba de hacer en la persona de Juan Antonio de la Fuente, es un agravio y un insulto que se le hace a Nuevo León y Coahuila.

DIA 11.—Salimos de San Luis como a las nueve y media y llegamos muy temprano a Bocas, 13 leguas. Nos acompañan algunas familias, y entre otras la del finado General Jáuregui, el Coronel Lama, un padrecito aún muy joven que por liberal le persiguen sus hermanos de San Luis. A los cuantos minutos de entregar nuestra tropa a los prisioneros Oton y Alfaro, éste último logró fugarse. Se supone que el oficial de los mochos que los recibió estaba de acuerdo con él. Hoy a las 3 de la tarde hizo un mes que el ejército del Norte rompió los fuegos sobre la Plaza de San Luis, y con haberla tomado la salvó del saqueo espantoso que la amenaza. —La población sin duda ha quedado muy agradecida, pero no así el Gobierno, cuya conducta no indica nada favorable para la frontera. Se corría muy válida la voz en San Luis, que D. Juan José de la Garza, sería nombrado Ministro de Relaciones. Si así sucede, sería un insulto atroz que se le hace a Nuevo León y Coahuila. La voz pública acusa a esta nulidad de peculado y de haber desem-.

© Biblioteca Nacional de España

%p30–Valdes–2025–10–15%

12 DIARIO DEL CORONEL VALDES.

bolsado grandes sumas del Tesoro público, y muy inmoral debe ser el Gobierno que coloque en puestos distinguidos a semejantes bichos.

DIA 12—Se hizo jornada al Venado, 12 leguas de Bocas. —Lloviznaba y hacía frío. Ayer llegó a San Luis el Coronel Moret nombrado Comandante General de este Estado, por el hombre Comonfort—¡ Viva el Estatuto Orgánico Provisional!—Sin embargo de la miseria y escasez que nos acompaña, toda la fuerza va contentísima porque va a su casa. ¡Bendito sea el Estado de Nuevo León y Coahuila!

DIA 13—En el Venado nos quedamos hoy en consecuencia de la muy grave enfermedad del Lic. Coronado que sufrió un ataque cerebral que le iba a costar la vida. Se escapó en una tablita, gracias a la actividad del médico que acompaña a él y a mi primo D. Miguel Blanco. En la noche vinieron algunos señores acompañados de la música, y dieron serenata al Sr. Vidaurri.—Muy poca correspondencia de Monterrey y de ningún interés.

DIA 14.—Salimos del Venado y llegamos a Laguna Seca, diez leguas.—En el Venado se quedó el Lic. Coronado, ya convaleciente, quedándose para acompañarle el Licenciado Blanco, el Dr. Castillo y varios otros. Coronado estaba fuera de peligro. En Charcos comimos y se le dio un pienso a la caballada. En Laguna Seca alcanzamos a Márquez, y los carros de Gutiérrez van delante.

DIA 15.—Se hizo jornada a la “Presa” 15 leguas, sin novedad.—Comimos en el “Represadero” y en la Presa alcanzamos a las del 1er. Regimiento.

DIA 16.—De la Presa hicimos jornada al Cedral, 10 leguas. En Matehuela almorzamos y alcanzamos a Zayas.—En la tarde que llegó D. Santiago, la población lo recibió con el mayor entusiasmo. Cohetes, música, repiques a vuelo, etc.—Presencié un acontecimiento que me enterneció.

© Biblioteca Nacional de España

%p31–Valdes–2025–10–15%

MEMORIAS DE LA GUERRA DE REFORMA 13

mucho. El pueblo en masa se agolpó a la casa donde se había hospedado el Sr. Vidaurri y en partidas de 40 y 50 entraba a la Sala, le daban un abrazo al Sr. Vidaurri y se salían. Estas visitas consistían de hombres, mujeres y niños de todas clases y tamaños, la sinceridad del afecto de esta multitud era evidente, y D. Santiago se mostró muy afable con todos ellos.

DIA 17.—Llegamos a San Juan de Vanegas, 5 leguas.—Se perdió el día para que descansara la remuda.—D. José María Alfaro que mandaba en Jefe las fuerzas de los reaccionarios cuando las fuerzas de Nuevo León y Coahuila tomaron posesión de la plaza, fue aprehendido hoy en compañía de D. Rafael Barragán, que también había pertenecido a las filas de los reaccionarios—A éste último se le había dado pasaporte en San Luis para que en el término de 25 días se presentara en México, según lo prevenido por el Supremo Gobierno. El Sr. Vidaurri remitió a los dos a Cedral para que de ese punto sean conducidos a San Luis Potosí.—Alfaro teme mucho que Moret, quien ahora es Comandante General de San Luis, use de alguna arbitrariedad con él. Le puse oficio al Ministro de la Guerra y al Comandante General de San Luis, de todo lo ocurrido.—Alfaro, todavía hombre en la flor de su edad, pero según dicen, no será de ningún provecho al país.

DIA 18. De Vanegas al Salado, 16 leguas, y llegamos temprano con un polvo y aire que nos mortificó muchísimo. —En la tarde se soltó el Norte con agua y la noche está borrascosa y amenazante—Esta mañana salieron Alfaro y Barragán para el Cedral, y de ahí pasarán a San Luis Potosí, si en el camino no les pintan un venado a los de la escolta que los custodian. —Alfaro se mostraba muy abatido y desanimado—Aquí se concentraron todas las familias que nos acompañan, la del finado Jáuregui, la de Martínez de Castro, la de Camacho, etc., etc. —Sin novedad.

© Biblioteca Nacional de España

%p32–Valdes–2025–10–15%

14 DIARIO DEL CORONEL VALDES.

DIA 19.—Llegamos a la Encarnación, 16 leguas de sol y polvo. La mayor parte de la fuerza se quedó atrás, porque la remuda viene en mal estado.

DIA 20.—Se hizo jornada a Agua Nueva y llegamos como a las 2 de la tarde, 14 leguas. —El Sr. Vidaurri determinó que yo me adelantara para agenciar 500 pesos en el Saltillo, para socorrer a las fuerzas de la frontera de Coahuila. En la noche llegué a Buenavista, 6 leguas.

DIA 21.—Llegué a Saltillo y con D. Luis Cepeda arreglé el préstamo de los 500 pesos. —El Sr. Vidaurri con su escolta llegó a las 11, y se pasó a la Rinconada.

DIA 22.—Salí del Saltillo a las 4 de la tarde, y pernocté en el Jaral en casa de un canalla que se llama Ignacio Soto.

DIA 23.—Llegué a Monterrey a las ocho de la noche y me encontré con la familia de tía Tulita enferma de viruela. —A Tula chica se le murió su hijito Pancho, ¡pobre criatura!

DIA 24.—Gasté el día en visitar a los amigos, y por el Correo de Matamoros, veo que me suponen muerto. Con este motivo Juan Sánchez y Juan Pineda me dedican unos versos en el periódico, “El Ranchero”, que se publica en Matamoros.

DIARIO DE ACONTECIMIENTOS EN EL INTERIOR DE MÉXICO

1858, Junio 15.—Hoy salió parte de la fuerza del 4.º Regimiento de Caballería, que bajo las órdenes del Coronel D. Indalecio Vidaurri, marcha para unirse con el ejército del Norte. —Hicieron jornada a Santa Catarina, sin novedad.

DIA 16.—Toda la fuerza llegó a la Rinconada y antes de las ocho pasó un extraordinario del General en Jefe para el Coronel Zuazua, y recibí carta de D. Santiago y Doña Juanita.— En el Saltillo las contestaré. Se enfermó padre Die-.

© Biblioteca Nacional de España

%p33–Valdes–2025–10–15%

MEMORIAS DE LA GUERRA DE REFORMA 15

go y temo mucho que por su avanzada edad no sobreviva por

las fatigas de la campaña.

DIA 17.—Se hizo jornada a Ramos Arizpe, sin más novedad que la de estarse agravando padre Diego en su enfermedad. Se envió al Saltillo por médico y un carruaje en que llevarlo. Se agregaron algunos que vinieron de Monterrey a las fuerzas, Cecilio Gómez, etc.

DIA 18.—Se envió al Saltillo a padre Diego un poco aliviado; pasó malo para Monterrey. —Se gastó el día en hacer ejercicio y tirar al blanco con los rifles de Scharp. En la Noria me adelanté al Saltillo para agenciar algunas cosas que faltan para la fuerza que envió D. Santiago.

DIA 19.—Llegó la fuerza al Saltillo y se pasó a Buenavista. Se puso oficio al Comandante Militar para que arrestara a D. Maximiano de León y lo remitiera a esta hacienda por haber circulado entre la tropa noticias con el fin de desanimarlos y hacer creer que el enemigo era invencible. Se escribió a D. Santiago.

DIA 20,—Se recibieron 25 pistolas de Colt para la oficialidad, y a más a De León se le puso en libertad después de una regañada. —El Don ya había hecho lucha para que una de tantas Ninfas de las que andan por estos mundps de Dios lo acompañara para que le hiciera los remedios. El Coronel mandó que esta Ninfa de Venus se quedara, sin embargo de la voluntad que tenía de servir en las filas del ejército del Norte. —Se hizo jornada a Agua Nueva y se arreglaron en parte algunas compañías. —Se escribió a Monterrey.

DIA 21.—En Agua Nueva se distribuyeron las pistolas de Colt entre la oficialidad, y se reforzó la fuerza con más de treinta y tantos hombres que llegaron de Monterrey. —Se arreglaron las compañías y se dieron a conocer varios oficiales. En la tarde se hizo ejercicio.

© Biblioteca Nacional de España

%p34–Valdes–2025–10–15%

16 DIARIO DEL CORONEL VALDES.

DIA 22.—Se hizo jornada de Agua Nueva a la Encarnación, y se preparó la correspondencia que el 23 se despacha para Monterrey y Zacatecas acompañado del derrotero que llevamos. La fuerza va bien y deseosa de recibir noticias de Monterrey o de Zacatecas.

DIA 23.—Salió Justo Treviño de extraordinario para Zacatecas con carta para el Coronel Zuazua. Como a la una y media de la tarde llegamos a Rocamontes. Al salir del hermoso punto de Rocamontes la vista es hermosísima por lo pintoresco de las montañas que de golpe se presentan a la vista.

DIA 24.—DIA de San Juan, y cambiando de derrotero tomamos el camino de Bonanza. Llegamos a esta hacienda como a las tres de la tarde: la tropa se comenzó a enfermar por el cambio de temperatura, agua, etc.—En la noche hubo serenata en honra de Doña Juanita, esposa del General en Jefe del ejército del Norte, y madre del Coronel del 4º Regimiento de Caballería, D. Indalecio Vidaurri. Se le dió permiso a la tropa para que se paseara hasta tocarse el silencio. Formaron bailecito y se divirtieron a su estilo.

DIA 25.—En Bonanza, se despachó correo a Sierra Hermosa para advertirles a los correos que lleguen para esta fuerza, el camino que deben tomar.—En la tarde se despachó a D. Rufino Lavín con un oficio y carta partiular para D. José María Izasi, Jefe Político de Mazapil, pidiéndole $1,000, para las urgencias de esta fuerza. El Administrador de esta hacienda, D. Juan Tarda, nos trató a todos con el mayor cariño y caballerosidad. En España fue Coronel de los llamados facciosos. Se continuaron tomando medidas para el mejor arreglo económico del Regimiento.

DIA 26.—Hicimos jornada a Cedros, temprano. Aquí se recibieron $265 que voluntariamente nos facilitaron los de Mazapil, D. José María Izasi dando $100 de esta cantidad.

© Biblioteca Nacional de España

%p35–Valdes–2025–10–15%

MEMORIAS DE LA GUERRA DE REFORMA 17

Se facilitaron unos quince caballos prestados por hoy, y se devolverán al rendirse la jornada. Nada sabemos de oficio y corren muy válidas las noticias siguientes: ¡Osollos había muerto en San Luis, de fiebre! Miramón había salido de San Luis sobre Guadalajara, y parte del ejército del Norte en Zacatecas se movió sobre él y el resto sobre San Luis: La Plaza de Durango había sido ocupada por las fuerzas federales y en el Real de San Juan de Guadalupe se levantó el peladaje y saquearon las casas de los españoles, Tocas, etc.

DIA 27.—Salimos de Cedros y dormimos entre la Candelaria y la Gruñidora, cerca del tanque de San Cosme. En el camino se recibió un correo de D. Juan Bustamante que trajo una carta de D. Juan Zuazua, fechada el 22 en Zacatecas, acompañando el derrotero que esta fuerza debe llevar. Confirma la muerte de Osollos el 18 del que rige y la salida de Miramón para Guadalajara. —El Coronel Zuazua había determinado moverse sobre San Luis. Nos llovió en la tarde y los campos presentan hermosas sabanas de zacate, leña, etc.

DIA 28.—Pasamos por la hacienda “Gruñidora” perteneciente a D. Manuel Serrano. Esta ha sido en tiempos pasados una hermosa finca, según lo indica cuanto se ve, y ahora están recomponiéndola con el objeto de surtirla de ganados, caballada, etc., etc. Pernoctamos cerca de la Encarnación y nos llovió bastante en el día. Los agostaderos por todo esto son buenos, pero los indios no los dejan hacer ninguna cosa de importancia.

DIA 29.—Pernoctamos en el campo entre la Encarnación y San Andrés que es un bonito rancho perteneciente a Sierra Hermosa, de la propiedad de los hijos del finado Conde del Jaral. Los agostaderos son excelentes y bastante cubiertos de ganados, etc., etc. En la noche nos alcanzó un correo del Sr. Zuazua que se hallaba en Salinas del Peñón Blanco.

© Biblioteca Nacional de España

%p36–Valdes–2025–10–15%

18 DIARIO DEL CORONEL VALDES.

el 25 del corriente. Avisa que unos quinientos del enemigo

habían estado en Charcas, y que avanzáramos con precaución:

que el Sr. Aramberri con una fuerza de caballería había salido

a perseguirlos y que esta fuerza avanzara para llegar a su

destino cuanto antes.

DIA 30.—Pernoctamos entre Santo Domingo y San Andrés.

Las noches muy frías y los soles muy fuertes.

Julio 1º.—Sesteamos en el tanque de la Mancha y al hacer alto

la fuerza, se le fue el tiro a un soldado e hirió a otro en los

lomos. Se le preparó una camilla y viene bastante aliviado.

Pernoctamos en el campo frente al Estribo.

DIA 2.—Antes de salir llegó un extraordinario que viene de

San Luis y va para Monterrey, con la noticia de la toma de

San Luis por nuestras fuerzas el 30 del que finalizó. Al llegar

a Guanamé, las avanzadas dieron aviso de que habían dado vista

al enemigo y aunque no salió cierto, se notó su entusiasmo

y alboroto en toda la fuerza. Pernoctamos en Guanamé,

hacienda hermosísima, perteneciente a D. Domingo Rascón.

Tiene hermosísimos agostaderos y una población de 1.300

almas. En la noche llegó un correo de Monterrey, enviándole

doce pistolas de Colt al Regimiento de Zaragoza.

DIA 3.—Salimos de Guanamé y se hizo jornada a la Hedionda.

En la tarde se adelantó el Coronel con un escolta para llegar

a San Luis y preparar cuarteles, etc.

DIA 4.—La fuerza hizo jornada a Bocas y yo me quedé en el

Huisache. Llovió todo el día.—aniversario de la Independencia

de los Estados Unidos.

DIA 5.—Llegamos a San Luis, y la ciudad presenta un cuadro

lastimoso. Los criminales que la ocupaban, la tienen muy bien

fortificada, y apenas se puede creer que tan pronto se hubieran

puesto en fuga tan luego como una parte.

© Biblioteca Nacional de España

%p37–Valdes–2025–10–15%

MEMORIAS DE LA GUERRA DE REFORMA 19

Insignificante de nuestra fuerza se hizo de dos de sus fortines. Toda su artillería, parque, etc., etc., dejaron en la plaza, y todo el material de guerra es de la mejor clase. La pérdida de nuestra fuerza fue insignificante, y esto prueba que nunca tuvieron intención los de la plaza de defenderla como lo podían haber hecho, si consideramos lo ventajosísimo de todos los puntos que ocupaban. Seis meses habían gastado en fortificar esta ciudad, y sin embargo de tanta amenaza, tanto insulto atroz, tantas protestas de morir en la demanda, en menos de tres horas de combate huyeron con asombrosa cobardía y los primeros para hacerlo fueron los principales jefes y oficiales. El hecho de ponerse en fuga antes de estar la ciudad circunvalada fué el que salvó a la mayoría de toda la fuerza. Causa indignación y coraje el pensar en la criminalidad de estos hombres, y México se pierde si no se corta la manera de revolucionar. !Dios salve a la infortunada patria! —Muchas han sido las atrocidades cometidas a la sombra del asalto y Dios quiera que Don Santiago venga cuanto antes.

DIA 6.—Gasté el día en arreglar papeles para Revista de Comisario y a la Merza se le dio una parte de sus haberes vencidos. Vi a Hinojosa y a otros amigos. Al último hay alguna esperanza. Celso Olivares recibió orden para expedicionar a la Huasteca. Le van a faltar armas.

DIA 7.—Se habla de despachar al 4º Regimiento a Querétaro. Aquí está Aranda que con su Sección había ido a Aguascalientes. Según aseguran, su conducta ha sido criminalísima. Tratan de meterlo a prisión.

DIA 8.—Hoy saldrá de Monterrey el Jefe del ejército del Norte. Dios quiera que venga cuanto antes, pues los señores Consejeros de D. Juan Zunazua están causando graves perjuicios con sus intriguillas y chismes. Hoy se publicó un Bando según el cual, el Jefe de las armas reasume el mando.

© Biblioteca Nacional de España

%p38–Valdes–2025–10–15%

20 DIARIO DEL CORONEL VALDES.

civil y militar en el Estado, instituyendo con esto al gobernador Constitucional. Este hecho lo califican aquí como un atentado atroz contra la soberanía de San Luis Potosí, y uno creería que los consejeros de Zuazua se proponían perderlo con darle semejantes consejos. Estos hechos, entre otros, son los que han comenzado a alarmar a los más entusiastas del partido liberal mismo, y de ello se regocija el enemigo. Al enemigo se le ha presentado un flanco terrible para que en el terreno de la legalidad nos ataque con buen éxito. Aseguran que hoy han llegado comisionados de Guanajuato, y que Arteaga mismo está aquí. Esta tarde fué facilitado un infeliz, por el crimen de homicidio.

DIA 9.—Repentinamente se dio orden de marcha, y sin embargo de que la tropa ignoraba semejante orden, para la una de la tarde toda la fuerza había salido de San Luis. La Sección entera se compone de 1,800 a 1,900 rifleros a caballo bajo las órdenes del Coronel del 1er. Regimiento de Nuevo León y Coahuila, D. José S. Aramberri. El 4.º Regimiento bajo el mando del Coronel D. Indalecio Vidaurri, forma parte de la Sección. En este Regimiento vienen los de Coahuila. Llevamos el rumbo de Guanajuato con órdenes de perseguir y atacar al enemigo donde quiera que se encuentre. De paso se irán restableciendo las autoridades constitucionales. La Sección va a la ligera, sin carros ni ninguna cosa que impida la rapidez de sus movimientos. Es una Sección formidable por la clase de hombres que la componen y por la superioridad de sus armas. Los amigos necesitan algo más de fueros para derrotarnos. Quiera el cielo que al último impere la voluntad del pueblo. Se recibió noticia de que los reaccionarios con algunas fuerzas ocupan a Silao y Guanajuato. Para allá vamos—Se empieza a notar el contraste asombroso entre los pobres y ricos—Se hizo jornada a la hacienda de Gogorrón cerca del Valle de San Francisco.

DIA 10.—Se hizo jornada a la célebre hacienda del Jaral.

© Biblioteca Nacional de España

%p39–Valdes–2025–10–15%

MEMORIAS DE LA GUERRA DE REFORMA 21

cuyo número de pobladores asciende, según informes, a quince mil habitantes.

Esta hacienda es una de las más ricas

y hermosas en la República, y la pequeña ciudad que lleva

el nombre del Jaral tiene algunas fincas muy buenas y de

mucho valor. Esta noche parece una feria, y al ver a nuestros

soldados divirtiéndose, nadie supondría que andaban en

campaña. Además de las buenas casas y iglesias que se notan

aquí, llama la atención una huerta que tiene cosa de

una legua de circunferencia. Todo el terreno de aquí a San

Luis está bien cultivado y llaman la atención las grandes

siembras de chile colorado.

DIA 11.—Continuamos en el Jaral habilitando la fuerza

con caballos, etc. En la tarde nos pasamos en la muy hermosa

huerta y merendamos en el centro de ella, donde los

dueños millonarios habrán pasado tantos días de placer.

Quizá nunca soñarían en que los “vándalos del Norte”, los

enemigos de sus privilegios y fueros habían de ser servidos

por sus criados en sus mismos jardines. —El efecto moral

que la presencia de nuestro ejército causará en el interior

será provechoso para el pueblo y quiera Dios que los resultados

sean dignos de los sacrificios hechos por Nuevo León

y Coahuila. —Temprano en la noche llegó una comisión del

pueblo con la noticia de que unos sesenta y cinco hombres

del enemigo se habían retirado de San Felipe, anoche a las

diez.—Los acompañaron el Cura y las autoridades conservadoras.

—Que la tropa se haya retirado, no causa asombro,

¿pero el Cura? ¿Será porque ha cumplido con las obligaciones de su ministerio?

—El clero es el enemigo más formidable que tienen los pueblos y sus partidarios. —Nuestra

fuerza avanza llena de entusiasmo y confianza sin siquiera

pensar en que puedan ser derrotados.

DIA 12—Se hizo jornada de la hacienda del Jaral a San

Felipe. Según buenos informes, la dicha hacienda del Jaral

es la primera en la República, y su dueño es un verdadero.

© Biblioteca Nacional de España

%p40–Valdes–2025–10–15%

22 DIARIO DEL CORONEL VALDES.

tiranuelo entre sus vasallos. La especie de esclavitud que se nota en estas haciendas, es mucho más odiosa que la que existe en el Sur de los Estados Unidos.—Temprano en la noche vinieron varios particulares a visitar al Coronel Aramberri, y entre ellos dos de los Vicarios de esta Villa. Causaba asombro e indignación oír a estos señores contar muchísimas anécdotas para ilustrar el genio y carácter de su Cura párroco D. José María Espinosa, natural de uno de los pueblos inmediatos a Morelia. Según la verídica relación de estos señores, el Cura celebra los santos oficios cada y cuando se le antoja, comenzando las ceremonias a las once de la noche y a puerta cerrada. Uno de los Vicarios en una de estas solemnidades, llegó a sorprender a dos pecadores queriendo cumplir con el mandato de vivir y multiplicar, y aunque el dicho Vicario envió al hombre a la cárcel, por influjo del mismo Cura fué puesto en libertad, quien también suspendió al Vicario por lo que había hecho. El delincuente era el Jefe de una especie de Cofradía establecida por el mismo Cura, bajo el nombre de la *Santa Conferencia,* y sus miembros son otros tantos espías en la población. Por los pormenores que los Vicarios nos dieron, la conducta de este prelado es la más adecuada al objeto de corromper y fanatizar a las masas, y semejantes prelados son más perjudiciales a la sociedad que lo que podía serlo un ladrón de camino real.—En el camino encontramos un gran número de mujeres con muy pocos hombres, que iban de los ejercicios, y tan diestras en sus supersticiones que como uno de nuestros oficiales les dijo que cantaran las alabanzas, se soltaron cantando todos a un tiempo. Esta gente está para ser civilizada, y verdadera libertad no puede haber entre tantos ignorantes que ciegamente obedecen a un clero tan corrompido. —En la tarde llegó un carro de parque, escoltado por algunos de Monclova.

DIA 13.—La casa que se les dio a los dos Coroneles y a sus planas mayores, pertenecen a uno de los santos padres de.

© Biblioteca Nacional de España

%p41–Valdes–2025–10–15%

MEMORIAS DE LA GUERRA DE REFORMA 23

Esta villa, y es un verdadero palacio. —Cuando consideramos el lujo asiático de muchos de estos humildes pastores, nada tiene de particular que todos los del alto clero se hayan convertido en conspiradores. —Esta mañana llegó un extraordinario de Guanajuato con la noticia de haber evacuado la plaza con sus fuerzas el General reaccionario Mora y Villamil, tan luego como supo que nos acercábamos. Se cree, según informes que los dignos apóstoles del absolutismo, se están concentrando en México. —El Cura Espinosa, de esta villa, fue arrestado hoy, y mañana bajo estricta custodia saldrá para San Luis Potosí. Este prelado es un conspirador consumado, triste de él si lo juzgan según las leyes de conspiradores. Causa asombro lo que cuentan de este “Ministro del Señor”, como también los medios que ponía en juego para mantener viva la oposición al Gobierno. Esta tarde se restituyeron las autoridades constitucionales con las solemnidades de estilo, cohetes, música, repiques a vuelo y muchos vivas a la libertad, a la Constitución de 57, al caudillo del Norte, a los Coroneles de nuestra Sección y al pueblo soberano. Se recibieron periódicos de Monterrey, Zacatecas, etc. Pero nada de particular se nota en ellos. —De San Luis sabemos que el Coronel Zuazua despacha desterrado a la frontera al Obispo de San Luis Potosí y 36 frailes. ¡Qué primor!

DIAs 14 y 15. Hicimos jornada al Rincón de Ortega, bonita hacienda perteneciente a D. Domingo Sota de Guanajuato. En la madrugada de hoy salió desterrado para la frontera el cura de San Felipe D. José María Espinosa. ¿Qué diría este hombre perverso si la jugaran según las leyes vigentes de conspiradores? Unos cuantos malos sacerdotes como éste, ycausan más daños que todos los militares espadachines en el país. —Nos acompaña el padre Traspeña, por cierto el clérigo más descamisado que he conocido en mi vida. Quiere que nuestro Coronel lo nombre Jefe Político de Guanajuato, para poner dos batallones sobre las armas.

© Biblioteca Nacional de España

%p42–Valdes–2025–10–15%

24 DIARIO DEL CORONEL VALDES.

y arrancarle al clero todo el dinero que necesitamos, no hay peor cuña que la del propio palo. —Pasamos la Sierra de Guanajuato, que es riquísima por su abundancia de pastos, agua y maderas. Es camino durísimo y muy escabroso. —Para entrar a Guanajuato pasamos por la muy célebre mina de Valencianaenseña que ha enriquecido a tantos hombres, y que ahora se encuentra casi en ruinas. Las ruinas mismas indican que han visto brillantes días. —Como a las 5 de hoy 15, entramos a la ciudad, y frente al Palacio nos rodearon miles del pueblo que nos vitoreaban a porfía. Se notaba en sus semblantes una mezcluraenseña de esperanza, alegría y curiosidad. —Mora y Villamil, con Licéaga y doscientos hombres, están en Irapuato, y al saber que no miramos, sin duda tocaron las de Villadiego. —Los Coroneles ocupan el Palacio del Gobierno que es una soberbia finca, hecha con mucho gusto y muy bien amueblada. —Aunenseña la gente de criterio parece que está azorada al vernos, y no pueden comprender cómo había sido que tantos hombres de humildes trajes han derrotado y puesto en evidencia a tanto espadachín de golillas y aparejos bordados.

DIA 16. —Se despacharon correos para San Luis, Guadalajara y Morelia. —Se recibió noticia de que Licéaga, Mora y Villamil y toda su chusma, continúan su fuga rumbo a Querétaro. Y todo esto antes de movernos de aquí. Si después de esto, hay necios que crean que los tales militares valen un pito, los que tal cosa crean deberán ser o muy tontos o muy pillos. —Se recibió noticia de la toma de Durango, el 7 del actual por los de Chihuahua y Zacatecas, bajo las órdenes de mi amigo D. Esteban Coronado. Con este hecho las operaciones se reducen al centro de la República. —Fuimos esta noche al teatro, y el palco del Gobierno lo ocupaba el Sr. Aramberri con varios oficiales y yo, que lo acompañamos. La concurrencia nos observaba con una curiosidad muy notable, y por cierto que esta gente no tiene una verdadera idea de lo que es el mundo. No hay que dudarlo.

© Biblioteca Nacional de España

%p43–Valdes–2025–10–15%

MEMORIAS DE LA GUERRA DE REFORMA 25

La impostura y el charlatanismo son las dos cosas que han imperado en el país, y nuestra sola presencia en el corazón de la República, será prácticamente provechosísima para las diferentes clases de la sociedad. Se despacharon cartas a Monterrey.

DIA 17. Las familias empiezan a suponer que no somos tan salvajes, y esta noche D. Manuel Canal me presentó a la familia de D. Pedro Anda, hombre liberal y muy decente. Doña Carolina, su señora, es mujer interesantísima y canta con mucho gusto. —Muchísimos se han presentado ofreciendo sus servicios y todos se los hemos despachado al gobernador Rodríguez. Algunos han sido, no hace mucho, oficiales en las filas de Zuloaga, y el descaro de estos hombres que se creen decentes, nos prueba la general corrupción en esta parte del país. —Recibimos impreso el parte que el peladito Miramón le da al tallador Zuloaga, fingiendo que el 7 del corriente derrotó al Sr. Degollado en la barranca de Atenquique. Lo que hay de verdad, es que a este espadachín mentiroso, le fue peor que en Carretas. El gobierno de este estado facilitó 15.000 pesos para socorrer la fuerza con cuarta parte de su haber.

DIA 18. —Llegó correo de San Luis sin traer nada de interés. —Los ánimos se han tranquilizado completamente y el gentío en la plaza hoy fue inmenso por ser día domingo que es cuando vienen los operarios de las minas con el fin de oír misa y hacer sus compras para toda la semana.

DIA 19. —Salieron 600 hombres con Dávila a situarse en León, y 300 con Galán a situarse en Irapuato. Se recibieron comunicaciones de Zuazua, y encarga mucho que se le envíen recursos. Nos hallamos en una posición de poder hacer mucho en bien del pueblo. —El actual gobernador don Francisco de P. Rodríguez, disgusta mucho a los liberales con sus medidas, y estoy casi seguro de que la diputación permanente lo removerá. —El Sr. Berduzco sería nombrado gober.

© Biblioteca Nacional de España

%p44–Valdes–2025–10–15%

26 DIARIO DEL CORONEL VALDES.

nador si él quisiera, pero no conviene porque nos puede servir mucho mejor en Querétaro. —Aquí se pueden sacar recursos y se sacaron. —Escribí al Lic. Gómez en San Luis,

DIA 20.---Correp del Sr. Huerta para que con estas fuerzas se le sostenga en caso de atacar él con los de Michoacán a los de Acámbaro. Miramón salió de Guadalajara y no sabemos si se dirigirá a San Luis, a esta capital o a México.

—Pase al salón del Congreso de este Estado, asociado con el Lic. Lemus, para exponer a S. 4 como lo hice cuáles eran las miras del Sr. Aramberri, Jefe de nuestras fuerzas respecto de la persona en quien debiera de recaer el nombramiento de Gobernador interino del Estado. Sus señorías se dignaron escucharme con la mayor deferencia e hicieron suyas las ideas que avancé en cuanto a la única clase de hombre que en tan apremiantes circunstancias convenía que empuñara las riendas del Gobierno para hacer frente a la situación. Mis razones tan se aprueban que hoy mismo recayó la elección en el Sr. D. Francisco Berduzco, que fue el que tanto recomendé, según las instrucciones que me dio el Sr. Aramberri. Berduzco es hombre de fibra, ilustración, probidad y liberal a prueba de bomba. —La mayor actividad y energía se necesitan para que no nos echen a nadar.

DIA 21. Se despacharon exploradores por cuanto camino Miramón pueda tomar. En San Luis supieron antes que nosotros aquí, que Miramón se había movido de Guadalajara. —Huerta se ha puesto en movimiento, y los de Acámbaro al saberlo evacuaron aquella plaza. Después de todo, el objeto del enemigo quizá será el de reunir todas sus fuerzas entre Lagos y México con el fin de proteger al Gobierno Cuevo-Zuloaga. —El Sr. D. Francisco Berduzco comenzó a funcionar de Gobernador interino de Guanajuato, y de su administración transitoria esperamos los mejores resultados. Mucha es la confianza que este señor me dispensa, y su nombramiento en gran parte lo debe a las razones que en el seno.

© Biblioteca Nacional de España

%p45–Valdes–2025–10–15%

MEMORIAS DE LA GUERRA DE REFORMA 27

del Congreso expuse para apoyar su elección. —La población se halla bastante alarmada aunque muy satisfecha por haberles asegurado a todos que si avanza el enemigo, nosotros nos saldremos, bien sea para retirarnos o para batirlo. —Esta noche el Gobierno celebró una junta de las personas más influentes, para que organicen una fuerza suficiente con el fin de proteger los intereses de la misma población. —Si hubiera suficiente armamento sería muy fácil poner 2.000 hombres sobre las armas en menos de diez días.

DIA 22.—Se recibió parte telegráfico de León anunciando que el traidor Miramón había entrado ayer a Lagos, aun no se sabe el camino que tomará, si para México, San Luis o esta capital. Los de Acámbaro con Mora y Licaega, Galindo, Pérez Gómez y demás chusma de traidores, se concentraron a Celaya, tan luego como supieron que Huerta había hecho una demostración contra Acámbaro con mil hombres. Huerta tiene más de tres mil hombres pero le faltan armas y dinero. —Los de Veracruz, avanzaron a Jalapa y se supone que continuarán sobre Puebla, donde el atroz Echegaray ha sido relevado por el bruto ex-ministro de Zuloaga, Parra. —En México se impuso un préstamo forzoso de un millón de pesos, y sin embargo de que se garantizaba su pago con los bienes del Clero, no hubo quienes quisieran dar el dinero. Hubo embargos, pero no hubo compradores, y esta violenta medida causó un profundo disgusto. —El Gobierno de los tahures espaduchines y sacrilegos impostores se desmorona, y falta que ver si los beneficios serán proporcionados a los tesoros gastados, y a la sangre vertida. —Se recibió orden de Zuazua para que nos replegáramos a San Luis y no será mientras no sepamos que el enemigo se mueve o no sobre San Luis. Se despacharon órdenes a Dávila y Galán para que se desplegaran a San Felipe. Escribí a Mean y a Pedro Hinojosa.

DIA 23.—El día entero se pasó en recibir las noticias que nos traían y que llegaban cada media hora. —Miramón llegó a León ayer con doscientos hombres y quince piezas, y según.

© Biblioteca Nacional de España

%p46–Valdes–2025–10–15%

28 DIARIO DEL CORONEL VALDES.

otros, con 2.800 y doce piezas. —A las cuatro de la tarde toda nuestra fuerza estaba con brida en mano, y aguardando por momentos la hora de marcha. —Es de notarse la exaltación de muchos particulares que a cada momento llegaban para informarnos que tendrían que acompañarnos aunque su único crimen era el de ser liberales exaltados. Entre los muchísimos que nos acompañaban se nota al “cieguito” don Juan Valle, el vate de Guanajuato, poeta de mucha capacidad cuya interesante conversación indica talento y fino. Es hombre exaltadísimo y de muy buena aceptación aún entre la aristocracia de esta ciudad. Entre otros nos acompaña el muy liberal Gobernador interino de este Estado don Francisco Berduzco, hombre de fibra y mucho espíritu público, además del reductor de la “Blasa”, el Lic. D. Vicente Méndez, hombre de dimensiones a la liliputiense, pero vivo como una avispa. —Les causó asombro a los habitantes cuando vieron que a eso de las seis empezaron nuestros soldados a desensillar como si no hubiese tal enemigo tan inmediato.

—Son las doce de la noche, y estoy tomando este apunte en la mesa del Palacio del Gobierno, donde úkases han sido expedidos por los secuaces de los partidarios del obscurantismo. El ronquido de los compañeros en los corredores y piezas inmediatas, indica que descansan como todo hombre de conciencia tranquila. —Llegó una comisión del Sr. Huerta, y el oficio que dirigió al Sr. Aramberri se expresa con mucha energía en favor de que la revolución se lleve a puro y debido efecto. La contestación que le dio va de acuerdo con sus sentimientos. —La misma comisión pasa a San Luis con el objeto de ver a D. Juan Zuazua sobre la misma materia. —Aún no sabemos si el enemigo vendrá para esta plaza o irá para México. No sería difícil darle un buen susto, pero las malditas órdenes que tiene el Coronel Aramberri lo amarran completamente, lo cual le causa la mayor pena.

—Nuestros exploradores cubren todo el terreno de esta ciudad a Silao y León, donde el enemigo pernoctó anoche.

© Biblioteca Nacional de España

%p47–Valdes–2025–10–15%

MEMORIAS DE LA GUERRA DE REFORMA 29

DIA 24.—Entre las once y doce del día comenzó nuestra fuerza a salir de Guanajuato tomando el camino del célebre mineral de La Luz, que pasa por el cerro trozado. El enemigo pernoctaba en Silao, cinco leguas de donde nosotros estábamos, sin embargo de su superioridad numérica, todos sus movimientos indicaban recelo, y, si no tuvieran sabido como lo supo que nosotros no intentábamos defender a la ciudad, por cierto que hubiera tomado el camino de México. La orden de San Luis para que nos retiráramos, causó la más justa indignación entre toda la oficialidad y tropa, y Aramberri con fundada razón sentía la oportunidad que se le escaseaba de darle un golpe de muerte a la reacción. El resultado no podía haber sido dudoso por las ventajas que el terreno prestaba, eran tan superiores que el enemigo hubiera tenido que batirnos en terreno escogido por nosotros mismos. Nuestra retirada de Guanajuato sin (aviolentamiento) ningún motivo, ha sido un triunfo para el enemigo, y la orden que la motivó fue hecha de la ignorancia de los hechos. —Tal era la precaución con que el enemigo avanzaba que con su vanguardia traía una pieza de artillería. Todos están convencidos de que si nuestros movimientos hubieran indicado que intentábamos aguardar el ataque el enemigo hubiera tomado el camino de México. Erróneamente se llegó a creer en San Luis que el enemigo avanzaba sobre San Luis cuando en realidad se concentraba para retirarse a Querétaro o México. La precipitación con que evacuó la plaza de Acámbaro al moverse Huerta, nos prueba que el temor es la idea dominante en las filas del enemigo. —Nos acompañan con el Gobernador una multitud de empleados y particulares de Guanajuato.

DIA 25.—A las 12 en punto salieron todas las fuerzas de la Luz y pernoctaron en la hacienda de San Juan de los Llanos. El enemigo entró a Guanajuato, y tanto en León como en Silao reclutó sus fuerzas con echar leva. Con un movimiento nuestro en combinación con Huerta y los de San.

© Biblioteca Nacional de España

%p48–Valdes–2025–10–15%

30 DIARIO DEL CORONEL VALDES.

Luis, bastaría para que el enemigo tomara el camino de México.—En la madrugada llegaron varios del cuartel general de Huerta, y entre otros el Mayor General de la División de Michoacán, D. Florencio Antillón. Los que le acompañaron son todos de Guanajuato, y llenos de entusiasmo. —Sobra gente muy escogida para organizar fuerzas, pero falta armamento para ponerlas en pie.—El Mineral de la Luz ha llegado a tener una población de 30.000 habitantes cuando en bonanza, y ahora tendrá de 18 a 20.000 almas.—El administrador me dijo que en diez años habían pasado por sus manos $40.000.000.

DIA 26.—Se hizo jornada a San Felipe, donde la fuerza se reunió con los 900 hombres que con Dávila y Galán habían entrado en León y Irapuato.—Los más de los señores Diputados del Congreso de Guanajuato han llegado y acompañarán al Sr. Berduzco. Se recibió noticia de Guanajuato que hoy o mañana saldrá Miramón para México, y que Liceaga, nombrado Comandante General, llegaría mañana; los señores Berduzco y Aramberri escribieron a Zuazua, recomendando que haga un movimiento para amenazar a los de Guanajuato, y si esto se logra, y el Sr. Huerta se mueve sobre Celaya, el Bajío quedaría sin duda completamente libre y entonces se podrían agitar toda clase de recursos por ser lo más rico del Estado de Guanajuato.

DIA 27.—Han llegado muchas gentes de Guanajuato y San Luis. Los primeros, para librarse de los campeones de la religión y garantías, y los segundos porque creen que los héroes de Carretas y Atenquique avanzan sobre los atrincheramientos de San Luis!! Ex menester mucha candidez para creer esta última suposición. Aquí se aguardaron órdenes de San Luis antes de emprender mi movimiento. Ya habrá calculado el Sr. Zuazua los efectos que bajo todos expuestos causó la orden que motivó la retirada de Guanajuato, y se arrepentirá de haber dado una orden tronante que ató de pies y manos al Sr. Aramberri.—El enemigo, estando.

© Biblioteca Nacional de España
