# Supplementary material for: A Methodological Framework for the Use of AI Tools in Automated Workflows for Generating Validated and Structured Historical Datasets
Source: Research Square preprint supplement (doi:10.21203/rs.3.rs-7943432/v1), 2025-11-17
Supplement: Supplementary file 33 [file DIARIO_DE_MANUEL_VALDES_OCR_TSS.docx]

​​a UNE PR

NEAR EN rd

pe A 5 PIES E | har vs

et E te | : ASE

A 2 E A »! e

ATINA ar E“ A BONS q

Ae E AQ NN í ul MOE E — ”.

ur ur E | ! E FA E: La ñ

CA E UT E RA 73 E

CE PON As:

NA a TE E Na o

2, 70 0-4 AA N E. A E Ds

a x a QA E Ne Le ENS Aa

e 18 y y ra “a Aa ALTAS Ned ; E

E > E AA E. AL y 0 TEN = Da

o A ha Y EL ; 2315) Y. DRA a

Ta EA DRA

e E NA EAT

y 9815 e e

EE

DAA ct AT

A

des NT Du NDSO

ROTO VITA EN CRD DE TAC

AE TONY E TERA

E Ne <a e

Y Ñ 1 PRISA h AS r

es EDEN ENE

e NN = Na s

SA A lao EN UNEN DS NED NN

AE A RAN CONEYA s

NA E NETA ATEN

2 E ED DAA ABLA q

AA NARA E AE

NA NA AAA Ea

ENT A DNA EU AL -

RA

Ro UI RN TNA a

E NE EEN EA ES == AC TES E

O IDEA NDA AE EA

a CONE e Gs

EA NAO a e AE AA

NTE CD us TEN

O UL DAN E

Em CNO ECO

ñ A ELE CA ZN

- IET == DA EIN 2 ES x*

ADE Ue AA

ANOS ANTE A ED

E ER LARREA, AZAR

Lo Y STE VA ANNE

UNC TUN NO NT S E

S DUNE NN ÓN

NOAA A SE e h : a

PEONES OI

E PATA UE, >= >

ADA

DA IN RU ARENA Te

DIETA NES TARA EEES

O Biblioteca Nacional de España

ky 9D.

SOCIEDAD MEXICANA DE GEOGRAFÍA Y ESTADÍSTICA

MEMORIAS

DIARIO DEL CORONEL

MANUEL VALDÉS

PRECEDIDO DE UNA INTRODUCCIÓN

rox

ALBERTO M. CARRENO

MÉXICO

Imprenta y Fotoupia de la Secretaria de Fomento

Us, , SD

O Biblioteca Nacional de España

O Biblioteca Nacional de España

42560

SOCIEDAD MEXICANA DE GEOGRAFIA Y ESTADISTICA

MEMORIAS

MANUEL VALDÉS

PRECEDIDO DE UNA INTRODUCCION

rox

ALBERTO M. CARREÑO

MEXICO

Imprenta y Footipia de la Secretari de Fomento

1913

O Biblioteca Nacional de España

O Biblioteca Nacional de España

INTRODUCCIÓN

Entre los diversos manseritos que lu Mociedad Mexicana

de Geografía y Estadística ha resuelto publicar, y que por

mi carácter de Primer Secretario de la Corporación me ha

cabido en suerte dar a las prensas, se halla uno por todo

extremo interesante, porque viene a aumentar el nímero de

documentos que habrán de servir para formar la hixtoria

de uno de los períodos revolucionarios más notables por que

ha pasado muestro puís: el de la reforma.

Exte doenmento es nada menos que un diario escrito por

el Coronel de las fuerzas “constitucionalistas,” D. Munuel

Valdéx, entro 1858 y 1860; documento que alcanza nna im.

portancia mayor, sí se piensa que no es probable que el Co-

vonel Valdés hubiera formado su diario con el deliberado

propósito de sacarlo a la pública Ius, tal como quedó, poco

antes de que sm antor sucumbiera en la Tucha; y en conse-

cuencia debe suponerse que los relatos contenidos en €l no

son fieciones meramente literarias Por esto el estilo es

descuidado, desenidada la ortografía! pero seguramente

ingenvas las declaraciones y los conceptos.

Sin embargo, antes de publicarlo tuve el propósito de pro:

curarme datos bastantes para identificar al menos la perso-

nalidad del Coronel Valdés, si acaso no era fácil hacer su

biografía; y la razón de esto es, que la Sociedad Mexicana

1 Al leprimir el manuseito la corregido a ortaganfa.

O Biblioteca Nacional de España

1 INTRODUCCIÓN

de Geografía y Estadística, enya labor en el emmpo de nues

tra historia nacional ha sido tan vasta, debe ser siempre

prudente al recoger y presentar nuevos elementos que tien-

dan a ampliar nuestras noticias aceren de la geografía, de

la historia y de la estadística de nuestro país, cumpliendo

así el programa de su instituto.

Y el manuscrito que he dado a la estampa, en virtud del

acuerdo tomado por la Sociedad Mexicana de Geografía y

Estadística, sólo tenía para identificar al amtor la sigmien-

te brevísima nota:

“Diario del Coronel Vuldés, Fué hecho prisionero por el

General don Domingo Cajén, del ejército renecionario en

1860 y fusilado en Duro, en Octubre del mismo año. Yo

mandé copiar este diario del original, pnes trató algo al

Col. V.—Agto. 7. (Una rúbrica)"

¿Quién había sido, xin embargo, el Coronel Vallés?

Pué éxta la pregunta que me formuló y a da que me pro-

puse dur respuesta sitisfactorin. xi nenxo esto era posible

Desde Tego, como era de vigor, leí integramente el ma-

nmserito a fin de formarme cuenta cabal, por su contexto, de

cuáles habían sido los actos del Coronel Valdés que pudie

van Nevarme a averienar, a lo menos, sir nombre completo.

La lectura del documento me reveló que el Coronel Val-

dés había sido originario de Matamoros, en Tamanlipas, o de

los Estados de Conmila o de Nuevo León, porque desde

luego puede verse de modo claro, que él era hastante cono-

cido en aquellos Igures.

Tn efecto, al referir el Coronel Valdés su regreso hacia

Ta frontera del Norte, después de que lax fuerzas del Gene-

ral Vidanrri habían estado en San Luis Potosí dnrante los

postreros días del mes de Febrero de 1856, en la anotación

que hizo el día 24 de Marzo de ese año, asegura que por el

Correo que recibió ese día, vió que en Matamoros lo supo-

nían muerto, y agrega: “...con este motivo Juan Sánchez

y Juan Pineda me dedican unos versos en el periódico “El

O Biblioteca Nacional de España

INTRODUCCIÓN Y

Ranchero” que se publica en Matamoros. ...” Es muy posi-

ble, pues, que el Coronel Valdés fuera originario de aquel

Jugar, 0, a lo menos, hubiera pasado allí una parte de su

vida.

“También se ve en el manuscrito, que tenía extensas y nu-

merosas relaciones con fumilias de Nuevo León y de Coa-

Mila; y más aña, que en aquella región existía una parte de

sí propia familia.

Fácil era, a primera vista, encontrar antecedentes del Co-

ronel Valdés con sólo buscar el periódico “El Ranchero” y

por la misma composición puética que en su loor o quizás

en su contra habían publicado los Sres. Juan Sánchez y

Juan Pineda, darse cuenta del concepto en que se le tenía;

pero en vista de la situación política que en los aetales

momentos existe en Matamoros, ocupada por fuerzas rehel-

des al Gobierno Federal, sería casí imposible encontrar per-

sona que quisiera. imponerse la tarea de correr en pos de

un periódico que se publicaha el año de 1858, y que tul vez

ni siquiera existe en las bibliotecas 0 en los avehivos, públi-

cos o privados, de aquella población, en el momento aetnal

Por do que respecta a sus relaciones de familia 10 pude lo-

ar ponerme en contacto con persona alguna que con él

Mmbiera tenido parentesco, aun evando para ello hice varios

intentos, que a la postre resultaron infenetuovos.

Creí entonces que en los libros de historia, que se acupan

en relatar los sucesos ocurridos por aquellos días, se encon-

tearía quizá la huella que tubiera podido dejar a su paso el

Coronel Valdés; pero la tarea fué en vano, porque aun

cuando todos los hechos de mayor 0 menor importancia, que

Valdés relata en su diario coinciden emm los mencionados en

aquellos Tibros, siempre xe refieren éstos a los jefes princi

pales; y así hemos encontrado referencias resperto de «Ara

berri y de Coronado, respecto de Degollado y de Vidamrri,

efe, pero no se menciona a los que, como Valdés, estaban

subordinados a esos jefes, salvo en casos excepcionales

O Biblioteca Nacional de España

vi INTRODUCCION

¿Qué hacer entonces? Pensé que si el Coronel Valdés ha-

día sido fusilado en 1860, los periódicos y efemérides de

aquellos días habrían, tal vez, consignado la noticia. euea-

miné por ese lado mis pesquisas, en las cuales amablemente

me ayudó mi distimenido amigo el Sr. D. Luis González

Obregón, Director del Archivo General de la Nación, y nada

hallé que me dejara satisfecho. Y busqué no sólo la noticia

especial del fusilamiento, sino todas aquellas relativas a

sncesos de más o menos importancia en que Valdés babía

tomado parto, entre 1858 y 1860, período que abarea su día-

rio, y encontré la miema difienttad con que había tropezado

en dos libros de historia: xi Valdés habla de la entrada

de las Merzas con Jas cuales iba, a la ciudad de Guanajuato,

los periódicos y las efemérides informan de la entrada de

esas Fuevas, sin citar de modo especial a Valdés: si éste da

enenta de haberse hallado en Teapuato, en Salamanca, y en

ofros muehos Ingares pertenecientes a los Estados del cen-

tro, se menciona a las fuerzas “constitncionalistas;” pero

m0) Valdés que yo buscaba. A las veces aparecía un Valdés

afiliado al Partido Libera! y comprometido en algún hecho

de armas o en algún notable suceso de otro género; pero al

examinar los actos relacionados en los periódicos y en el

diario mismo de Valdés, me convencía de que se trataba de

personas distintas.

Entonces me pareció que debía seguir dos nuevos cami.

nos: mo, recurrir a personas ilustradas de Guanajuato,

que pudieran estar en situación de recordar los hechos net

rridos en aquellos días, o de husear en los archivos y demás

fuentes apropiadas, datos relativos a Valdés: otro, buscar

esos datos en los archivos de la Secretaría de Guerra, ann

que me había formado la convicción de que Valdés no ha-

hía pertenecido al ejército regntar.

Para lo primero, eseribí al Sr. Lic. D. Agustín Tannza,

residente en la cíndad de Guanajuato, pidiéndole tuviera la

bondad de hacer la busca correspondiente o las consultas

O Biblioteca Nacional de España

INTRODUCCIÓN var

en su caso, a personas que pudieran recordar los sucesos

que dieron mugar a que el Coronel Valdés fuera nombrado

Mayor de la Plaza de Guanajuato y poco tiempo después,

Jefe político y militar de Irapuato.

Para lo segundo, solicité de la Secretría de Guerra la au-

torización respectiva a fin de que se me permitiera hacer

pesquisas en sus archivos; y al mismo tiempo supliqué a mi

estimable amigo el Sr. Gral. D. Eduardo Paz, que procurara

iuquirir de los viejos jefes y oficiales, si alguno recordaba

a Valdés, en vista de los antecedentes que de él podían re-

ferirse,

El Sr. Lic. Lanuza, en carta de 20 de Septiembre, me

decía:

“.....Segin me informa el Capitán retirado Don Felipe

Hernández, que conoció personalmente a Valdés, el nombre

de éste es Albino y formó parte aquí de nn cuerpo que se

organizó con gente del Valle de Santiago en la época a que

Ud. se refiere, Tuve que recurrir a este medio, porque en las

diversas obras sobre Mixtoria de México que consulté sobre

el partientar, nada pude encontrar...”

Deseracindamente los datos que fueron proporcionados al

Sr. Lic. Lanza no podían aprovecharse quizá debidamente;

porque, como me permití hacérselo notar, el Coronel Valdés

no había iniciado sn carrera en Guanajuato, sino en la fron-

tera del Norte; y no había formudo parte de las fuerzas

organizadas en el Valle de Santiago, sino que había venido dos-

de la misma frontera con el Gral. D. Santiago Vidaneri, mi-

litando despnés ya a las órdenes de Coronado, ya a las de

Aramberri, ya a las de Nerduzco. En cnmbio, había otras

civenastancias en favor de la aceptación del nombre indicado

por el St. Capitin Hernández; y consistían especialmente

en la amistad que Valdés había tenido con personas promi-

nentes de Guanajuato, anterior sin duda a los hechos que

refiere ch xn diario, y que podría indicar que él había vivido

algún tiempo en el Estado de Guanajuato y aun Jubía toma-

O Biblioteca Nacional de España

vin INTRODUCCION

do parte ev la organización de las fuerzas mencionadas por

el Sr. Capitán Hernández.

Era, pues, necesario continuar las pesquisas, y en efecto

las seguí con el mismo interés que antes; y aquí cabe decir

que la satisfacción de haher hallado el medio para obtener

el nombre del Coronel Valdés no me correspondió a mí sino

a mi buen amigo el Sr. D. Eugenio Zubieta, Subdirector de

la Biblioteca Nacional de México, que conociendo mix de

seos, había tomado con tanto interés como yo mismo, el bus-

car el nombre de Valdéx, que apenas eveíamos haber hallado,

se nos escapaba. Tras de muchos días de una labor ineficaz,

el Sr. Zubieta recordó que existía un libro intitulado “Du-

rango Gráfico)” y, al cabo, fué en este libro donde encontra-

mos el nombre de Valdés.

Yin efecto, en est obra, escrita por el Sr. Tie. D. Carlos

Mernándes, fueron publicados diversos doemmentos oficiales

que se relacionan con la historia de Durango, y entre ellos

aparece el parte del General Cajón, aumueiando haber hecho

prisimero a Valdés

11 15 de Agosto de 1860, el General renecionario—expa-

ñol de origen—D). Domingo Cajén, repetía al Ministro de

la Guerra el parte que le dirigió en 16 de Julio del mismo

año, dándole cuenta de una batalla que había sostenido a

dos feguas de la Villa de Allende, perteneciente al “titulado

Estado de Chihnalua.... con la mira do destruir el porpe-

tuo enemizo del Departamento de Durango...” (el grupo

formado por el Lic. José Eligio Núñez, Gobernador de Chi-

Imalua), y en ese informe relata aquel hechó de armas, di

ciendo :

inn. Tas tropas rebeldes intentaron avanzar rápida

mente para envolver a las mías por un movimiento simul-

táneo de su caballería e infantería; pero en el aeto opuse

mi caballería a la contraria frente a frente, y dejande na

pequeña sección de mi infantería roforzada con nn cañón,

al mando de mi segundo en Jefe Sr. Coronel D. Juan Már

O Biblioteca Nacional de España

INTRODUOCIÓN "

quez, quien observó una conducta digna de todo elogio, hice

que el resto de mi infantería dividida en dos secciones ob-

servase y rechazase los movimientos del enemigo en la línea

de su derecha, que era por donde pretendían flanquearme al

principio. Esta operación, auxiliada por los fuegos certeros

de mi artillería y Analmente por una vigorosa carga a la

bayoneta, desconcertó completamente a los rebeldes, los que

al sentir un considerable y rápido estrago en sus filas, se pu-

sieron en precipitada fuga dejando abandonada toda su ar-

tillería, parque, algún armamento y una bandera nacional

que el ya finado faccioso D. Estéban Coronado, había con-

quixtado en los fortines de Mazatlán y remitido a Chibua-

Na como un obsequio muy señalado.

“La pérdida del enemigo ascendió a más de doscientos

hombres muertos y heridos y cuatrocientos prisioneros, en-

tre ollos el titulado Coronel D. Manuel Valdés y otros varios

oficiales. La mía por el contrario fué muy poco significante,

pues sólo consistió en seis muertos, diez y seis heridos y

diez y ocho dispersos.

“El ex-Gobernador Núñez Inyó precipitadamente a Chi-

Tmahna, donde estuvo pocos momentos, y contimó su fuga

aceleradamente hasta el Paso del Norte....”!

El Valdés mencionado por Cajén no podía ser otro que el

antor del diario que posee la Sociedad Mexicana de Geogra-

fía y Estadística; porque aun cuando es verdad que en la

nota que hemos citado se asienta que fué fusilado en el mes

de Octubre de 1860, y según el parte de Cajén fué hecho pri-

sionero en el mes de Julio, na cireunstancia no excluye a

la otra; porque bien pudo haber sido hecho prisionero en

Julio y fusilado en Octubre; o quizá Mé fusilado en seguida

y en este caso el error podía existir en la nota del manuscri-

to, sólo por lo que respecta a la fecha del fusilamiento.

La declaración misma de Cajén, llamando a su prisionero

Hernández. — Durango Gráfico.

"

O Biblioteca Nacional de España

x INTRODUCCIÓN —

despectivamente ol titulado Coronel D. Manuel Valdés, es

otro motivo para no dudar de que éste y el autor del ma-

nuscrito son una misma persona; porque vasta ver el Jiario

para darse cuenta de que Valdés no perteneció al ejército

regular, sino que desde un principio militó en las filas del

General Vidaurri, compuestas, como se recordará, por los

célebres tagarnos o Dinsas de Conhuila y de Nuevo Teón.

Antes de lanzarse,a la revuelta, Valdés había estudo escri-

diendo en periódicos de los Estados Unidos, segu declara-

ciones de él mismo; y como los movimientos armados del

General Vidanrri lo indujeron a este nuevo género de lu-

cha, regresó de los Estados Unidos para acogerse a las ban-

deras del mismo Vidaurri.

Y la idea de que Valdés no formó parte del ejército regu-

Jar está confirmada, a mi modo de ver, por la falta de datos

acerca de él en los archivos de la Secretaría de Guerra; por-

que conseguido que hube del Ministro, por conducto del

jefa del departamento respectivo, Sr. Lic. Gral. D. Samuel

Contreras, la autorización para buscar en tales archivos,

mi labor fué estéril, a pesar de la buena voluntad con que

fucilitaron mi labor los Sres. Mayores Juan Salazar y Ja-

cobo Monroy; pues no existen datos respecto de algún ofi-

cial o jefe de apellido Valdés, que se halle en las condicio-

nes que aparecen del diario; 0, a lo menos, ha sido imposible

encontrarlos.

Debo declarar que mi presunción primera de que en la

Secretaría de Guerra y Marina, debían existir datos de Val-

dés relacionados con hechos de armas tan importantes como

la toma de Guadalajara por el General D. Santos Degolla-

do, resultó infundada; porque he tenido a la vista todos los

documentos que se relacionan con el sitio y toma de dicha

cindad: y sólo se guardan en aquella Secretaría los partes del

General Blancarte y de los demás jefes reaccionarios.

Esta eiremstancia en manera alenna significa que los ge-

nerales bajo cuyas órdenes militó Valdós no hayan hecho

O Biblioteca Nacional de España

INTRODUCCION xi

mérito especial de los actos llevados a término por él; ya

que sabemos por boca de éste, que su participación en el

sitio y toma de Guadalajara Je valió el ascenso a Teniente

* Coronel; lo que revela es un hecho que fácilmente puede ser

explicado: durante aquella Iucha, y antes de que el Partido

Liberal Megara a dominar al Conservador hasta constituir

el asiento de los poderes públicos en la capital de la Repú:

Mica, todos los partes y todas las noticias que se refundían

en el archivo de la Secretaría de Guerra eran los prove

mientes del ejército reaccionario, que estaba en posesión de

las oficinas federales en esta ciudad. Las noticias del ejér-

cito liberal seguramente xe enviaban a Veracruz y a los di-

versos Juzares por donde peregrinó el Sr. Juárez; y aun

cuando el arehivo del gobierno constitucionalista es proba-

ble que fé traído al Palacio Nacional, cnando logró el

triunfo el Partido Liberal, es bien sabido que el Sr. Juárez,

al emprender una nueva peregrinación a través de varios

Estados de la República, durante el período en que Maximi-

liano residió en México, Nevó consigo wa gran parte de los

afehivos; y que más tarde éstos fueron en el camino destruf-

dos por el fuego. Y tampoco puede intentarse que los ar-

chivos mismos del ejército reaccionario sean completos; que

tratándose de hechos de armas ocurridos tejos de la metró-

poli, los partes y noticias tenían que estar sujetos a innú-

meras contingencias, dada la difeultad de las comunica-

ciones.

Así se explica que la documentación que existe en la Se-

erctaría de Guerra sea más completa respecto del ejército

reaccionario, que acerca del liberal, y que cuando se trata

de encexor ocurridos en Tugures cercanos a la capital de la

Teepública o con mayor facilidad para el envío de noticias,

Ja documentación sen más copiosa.

Los datos que, en consecuencia, pueden presentarse res-

pecto del Sr, Coronel D. Manuel Valdés, son de poca signi-

ficación, toda vez que por medio de ellos sólo hemos logrado

O Biblioteca Nacional de España

xu INTRODUCCIÓN

saber como fué hecho prisionero por el General Cajén. Su

libro, sin embargo, es una reproducción bastante fiel de lo

que fué su vida durante un período de dos años, y en ese

libro podemos ver una vez más todos los horrores y todos

los ineonvenientes que consigo traen las guerras civiles, aun

cuando ellas tengan por finalidad el triunfo de principios

determinados. Los rencores y los odios que se producen

y día por día se exacerban entre hermanos, convirtiéndolos

en irreconciliahles enemigos son tales, que es imposible de

jur de desear, cuando se conocen los detalles de esos movi-

mientos armados, que de una vez y para siempre, de nuestro

país desaparezcan las contiendas de este género, para dar

paso nicamente a la lueha de las ideas, a la lucha de la

razón y € la lucha de la inteligencia.

Ta lectura del manuserito del Coronel Valdés nos hace

pensar que, en medio de los apasionamientos de que a veces

suele dar muestra, era por su parte un convencido, ya que

mirala con disgusto determinados actos de los jefes mismos

de su propio partido, temeroso de que esos actos pudieran

perjudicar el triunfo de los principios por que él Inchaba.

Cuando daba yo los primeros pasos para la impresión de

este manuscrito y cumplir de esta manera el-acuerdo de la

Sociedad Mexica de Geografín y Estadística, ereí que sería

muy útil ir anotando el diario en diversos Ingares en que

una anotación podría ser por extremo oportuna; pero pres-

cindí de mi propósito, porque tube de pensar que tal vez

alguna de esas notas podría ser interpretada como un co-

mentario; y la Sociedad no debe en este caso formular

comentario alguno, ya que al dar al público este manuserito

m0 ha desendo otra cosa, como dije al principio, sino aportar

un nuevo elemento para formar las hases en que ha de asen-

tarse la historia de la guerra de Reforma.

México, Octubre de 1913.

ALMERTO M. CARREÑO.

O Biblioteca Nacional de España

DIARIO DEL CORONEL VALDES

“Pu ho pristonen porel Ge

men Don Domingo Cjén, del

ajército uecionario on 1850 y fa-

silo en Dun, en Octubre del mi

moño. Yo mndé eupiurcate die

rio del oiinnl, ¡ue traté uo al

Col, Y —Agto

Prninno 1* ne 1858—Pernoctamos en San Juan de Va-

negus, y Negó uno de los oficiales del Coronel Zuazua que

salió de Mateluala, Las avanzados del ejército del Norte

Mean a Bocas cerca de San Luis. Esta noche acordó el señor

Vidawri que pasara yo a Catorce de interventor de la Adua-

ma, las rentas del tabaco, ete. También para agenciar un

préstimo de veinticinco mil pesos. Sin recursos nada se ha-

rá, y haré lo posible para desempeñar tan importante comi-

sión de una manera satisfactoria.

Dix 2—Salió el Sr. Vidamri de Vanegas y hoy llegné a

Catorce, Presenté las commnieaciones al Administrador de

Rentas y al Alcalde—Estos señoros se muestran muy incli-

nados a favorecer al St. Vidaurri y obsequiar sus deseos,

Mañana haré reconocimiento de sus libros y veré enánto

dinero se puede de pronto sacar para las urgencias del ejér-

cito del Norte. Es menester firmeza, energía y uctividad en

In-ejecución de las órdenes que tengo del Sr. Vidaurri. Ex

muy honroso el nombramiento-que me ha conferido.

Dia 3.—Me vino a ver el señor Administrador de la Aduana

D. Juan Durán, que es sin duda hombre muy honrado, se-

O Biblioteca Nacional de España

2 DIARIO DEL CORONEL VALUES

gín lo que de huen origen he sabido. Examiné el Corte de

Caja de la Aduana, y no hay de existencia sino unos qui-

nientos pesos del mes próximo pasado Enero. Escribt al señor

Vidanrri, y con fecha de hoy libró este señor por $500 contra

la Administración de Catorce a diez días de vista. El prés-

fimo de $25,000 se comenzó a recandar hoy, y se dificulta

por razón de no haber venido las conductos, ha más de tres

meses. Se nota la mejor disposición para facilitar el dinero,

lo que alegan tocante a la mueha escasez de dinero, es sin

duda efectivo. le logrado convencer a varios que con faci-

litar la cantidad que se les exige lo hacen en beneficio de la

población entera.

Dra 4.—Recibí carta del Sr. Vidaurri para que en dinero,

plata, pasta y lbranzas Neve todo lo que se haya. recibido

del préstamo de los $25,000. Se llevarán también dos mi!

pares de zapatos y mil jorongos. Ta población simpatiza

mucho con el St. Vidanrri y con los principios que profesa.

—Saldré tan Juego como pueda arreglar todo de manera que

el préstamo se haga efectivo.

Día 5.—Esta tarde Negaron los que de esta ciudad pasa-

ron a Matelnala para ver al Se. Vidaurri. La Junta para

reformar las enotas asignadas para el préstamo, nada de-

finitivo arregló, pero mañana según me asegura, quedará

todo arreglado, de una manera satisfactoria y en términos

que el préstamo se haga efectivo en los términos que el

Sr. Vidauri me lo previene en su carta de ayor—Escrihí

al Sr. Vidaurri y este señor salió esta mañana de Mate

Tala.

Día 6.—Sin embargo de los esfuerzos del Sr. Avila y míos

muchos alezan que no pueden exhibir las cuotas que se les

asignaron, y sé remelven a marchar al cuartel general para

hablar con el Sr. Vidamri, A las nueve y media salí del

Juzgado y se mustó todo el día en recandar todo lo posible

O Biblioteca Nacional de España

MEMORIAS DE LA GURNRA DE REFORMA L

en numerario. Mañana a las siete nos volveremos a reunir

para tomar medidas definitivas sobre lo que falta para efec-

tuar el préstamo.

Día 7.—Se gastó el día ep arreglar tanto que quedó ayer

pendiente. Se recibió libranza por tres mil pesos girada

por D. José María Tuna, contra los fundos del préstamo.—

Mañana es preciso acabar de arreglar todo para aleanzar al

Sr. Vidaurri pasado mañana.

Día 8.—Salí de Catorce, acompañándome D. Agustín An-

tonio Aguilar que me acompaña para ver al Sr. Vidaurri.

Tlevo calzado y jorongos para el ejército, dejando todo arre-

glado para el pago de Ja librunza de tres mil pesos girada

por el pagador del ejército. En Catorce dejé al Adminis

trador de la Aduana instrucciones para que mientras las

plazas de San Luis estén oenpadas militarmente por el señor

Vidanrri, no xe obedezean otrus órdenes sino las que emanen

de este señor.—Pernoetamos en las Carretas.

Dia 9.—Se hizo jornada a Guadalupe el Carnicero, cuyo

Administrador D. Julión Martínez nos trató con la mayor

urbanidad.

Dra 10—Llegrmos a los Charos donde me encontré con

el Dr. W. W. Vants, Cónsul Americano en Aguascalientes.

Ayer salió el Sr. Vidaneri del Venado y Calvo con Oso-

los y pandilla fueron derrotados por las fuerzas de Parro-

di en el Cerro de Magdalena.—Osollos perdió nn brazo en

la neción.

Dra 11.—Salimos con mucho frío de los Charcos y lega-

mos para medio día al Venado. Aquí recibí del Prefecto los

cuatro tercios de jorongos que habían sido remitidos por el

Presidente de Catorce—Se perdió el día en agenciar fete-

ros. El ejército habrá llegado a San Luis.

O Biblioteca Nacional de España

s DIARIO DEL CONONEL VALDES

Dia 12—Llegamos al (Bocas) Huizache cerea de Bocas,

Antier cerca de las doce de la noche salieron las fuerzas de

Bocas y ayer llegaron a San Luis— Recibí del cuartel ge-

neral orden para que se regresara D. Agustín Antona Agui-

lar a Catorce. En la Hedionda puse oficio al Prefecto de

Venado para que a precios de plaza e recibiera jorongos a

D. Loreto Reyes de Aguilar para el uso del ejército. La

carga me detiene.

Dis 13.—Llegamos a San Luis Potosí. El 11 del corrien-

te a las dos de la mañana, salió el ejército de Bocas, y el

12 a las tres de la tarde se aproximó a Sun Luis. Los pro-

nunciados bajo las órdenes de Alfaro, Otón y otros, ocupa-

ban la plaza que estaba completamente fortificada con ar-

tillería, trincheras y parapetos sobre las azoteas de las casas

principales. Las avanzadas del ejército del Norte comenza-

von tan Juego como llegaron, los fuegos, y a poco rato les

quitaron tres de las posiciones al cuemigo. Entró la noehe

y el fuego contimó hasta la una de la mañana que se rindió

le plaza. Alfaro, Otón y otros treinta de su oficialidad xe

ocultaron, pero el día 12 fueron aprehendidos, y ahora están

presos mientras el Gobierno dispone de ellos.—El 12 «e ve-

cibió Aguirre otra vez del Gobierno y hoy expidió el Sr. Vi-

danrri sus proclamas al ejército y a los potosinos, —Todit Ja

fuerza se portó muy bien, pero particularmente lus de Santa

Rosa y demás pueblos de la frontera de Coahuila.—El pela-

daje no dejó de hacer hastantes robos, y para evitar esto se

han puesto patrullas de día y de noehe.—Los potosinos por

cierto no están a gusto con Aguirre a quien parece que le

tienen el mayor odio. —La eindad está tranquila y de nuevo

se disfruta seguridad.

Día 14.—Se comenzó a quitar las fortificaciones de las

calles y recogerse la artillería y demás pertrechos de ¿mera

que perdieron los pronunciados. Visité la ilesin de la Com-

pañía de Jesíix y me llamó Ja atención el crecido número de

O Biblioteca Nacional de España

MENORIAS DE LA GUERRA DE REFORMA s

padres y frailes que en ella encontró. Sí la religiosidad de

los mexicanos fuera en proporción al número de clérigos

que mantienen, sería México el país por excelencia más eris-

tiano en el mundo. No puede progresar una sociedad que

mantiene en sn seno tanta ociosidad.

Dia 15—Fdegó el Coronel Flaneo esta tarde con cien

hombres de la frontera de Coahuila.—Recibí carta del Co-

ronel Castillo Montero que se ha mudado a Monterrey, en

consecuencia a los matamorenses—La función de toros que

hoy se dedicó 2 D. Santiago y a la oficialidad del ejército

del Norte, estuvo my conenrrida—Es diversión bárbara

que entre otras lindezas hemos heredado de los españoles.

—Visité varios templos, y el del Curmen (convento), es un

edificio suntuoso. La ciudad presenta la mayor actividad,

y apenas se habla de los desastres cansados por los aconte-

cimientos a que dieron Jugar el pronunciamiento de los fue-

ristas y religionarios. Tan acostumbrado está va el pueblo

a ver que los mayores crímenes xe cometen con impunidad,

— En México sobran Catilinas y faltan Cicerones.— Si el

pueblo Mega a comprender la magnitud de los ultrajes que

se le hacen, terribles serán sus venganzas.

DíA 16-—Llegó la noticia de haberse publicado Ja Cons:

titución e indulto general para los revolucionarios. Todos

pueden de nuevo conspirar contra la República sin tener

ningín castigo. ¿Viva el crimen! ¡; Viva la traición contra

las libertades púllicas!*—Escribí a los Estados Unidos y al

Tic. Castillo Montero, remitiéndole cartus de recomenda-

ción para el Lie. Garza Melo y D. Mignel Nieto, de Monte.

rey —Despaehé hasta ésta las de Espinosa en busca de mi

equipaje. Mucho temo que el conductor se lo haya robado.

Día 17— Asesivaron los pelados a um soldado de los

mestros y continuarán haciéndolo, si no se toman providen-

cias para evitarlo—Eseribí a México tocante al Consulado

O Biblioteca Nacional de España

La DIARIO Ml. CONONIL VALDES

de Brownsville—Nada de mi equipaje y mucho temo que se

o robó el conductor y me queda lo enenpíllado.

Día 18$—Nada de nuevo y ni noticias de mi equipaje—

Ta eindad está quieta y es increíble el número de pelados y

vagos que observa uno eh las plazas y calles. Mientras ten-

canos tanta ociosidad vo será difícil trastornar la tranqui-

lidad de Jos pueblos. —Salió Santa Cruz con sn escuadrón y

la conducta para Monterrey. Santa Crnz va a Aguameva,

Dia 19.—Con bastantes ansias se agnardaron correos de

México y Monterrey. Nada de noticias y se dice que pronto

Negará el General Parrodi con su mochería. No harán bue-

nas migas con los mestros.

Día 20.—Idegó extraordinario de Monterrey y recibí car

ta de Jovita B. de Mejía, para que me empeñe con el Sr. Vi-

dani, por sus hermanos Panelo y Rafael.—Se recibió no-

ticin del nombramiento de Gobernador de Nuevo León y

Coahuila que se hizo en la persona de D. Santiugo Vidaurriz

mejor nombramiento no se podía haber hecho y por cierto

que lo merece este henemérito cindadano. La noticia se re-

cihió aquí con el mayor entusiasmo, Imbo repiqnes. felicitu-

ciones, ete. En la noche toda la oficialidad y mn gran número

de particulares de esta cindad, pasaron con una handa de

música a la casa del general, y a las diez y media me vine

a recoger. Llegó mi equipaje y doy gracios a Dios. En la

tarde visité ln Culzada y el Santuario. Vi el punto donde

asesinaron al Gobernador de este Estado, D. Julián de los

Reyes,

Día 21—El comercio facilita recursos voluntariomente

para el sostén de las fuerzas del ejército del Narte. Esto lo

hace xin embargo de los esfuerzos del Gobernador D. José

Miría Aguirre para evitarlo. Este hombre malo y perezoso

había dado órdenes antes de nuestra llegada a esta plaza

para que en los pueblos del tránsito no se nos facilitaran

O Biblioteca Nacional de España

MEMORIAS DE LA UTRANA DE NEPORMA 7

reenrsos, y para que se opusieran con la fuerza si era posi

ble. No en vano le dicen a este criminal en Coahuila Picu-

Tuga y sólo el ciego espíritu de Partido podía haberle dado

el nombramiento de Gobernador de un Estado a semejante...

Itecibt carta del Administrador de la Aduana de Catorce,

D. Juan Durán. La eontestaré el Ines —Todo está quic-

to, y por todos lados se oyen maldiciones contra Aguirre.

El Presidente hace muy mai con no remover a este hombre

tun odiado de la población.

Dia 22—La función de toros dedicada al ejército del Nor-

te, estuvo muy concurrida y esta noche comienzan los bailes

de máscaras. Se dificultan recursos para las fuerzas, vi-

cias al empeño del Gobernador Aguirre para evitar que el

comercio de esta ciudad facilite las sumas que se necesiten.

Este gobernadorzuelo se vería ahora prófugo y sin destino,

si no fuera por las fuerzas de Nuevo León y Coahuila, pero

ni aun la gratitud, ni lo que exige la (situación) seguridad

de esta población de esclavos, hace prescindir a este perver-

s0 de las enconosas miras que abriga contra el Sr. Vidaurri

Sería mejor para la patría si semejuntes pícaros perecioran

en un patíbulo.

Día 23—Fscribt a D. Juan Durán, de Catorce, y a Ton-

chita Narragán. Escribí también a los Estados Unidos. Fuí

al baile de máscaras y estuvo bien indiferente. Tel comercio

ha quedado de facilitar recursos para el ejército, sin em-

hargo de los empeños de Aguirre para evitarlo. Mucho es

Jo que se quejan todas las clases aguí de este hombre pere-

z0s0 y malvado,

Dra 24.—Las funciones de los toritos, han salido hoy co-

mo ayer, por todas las calles, y el gran número de vagos

«me Tos signen indican la ociosidad de las maxas.

Dra 25.—Nada de nuevo y el comercio facilitó treinta y

cinco mil pesos para socorrer las fuerzas. Mucho sienten

O Biblioteca Nacional de España

_ DIARIO DEL CORONEL VALUES

los potosinos que nos vayamos, y temen otro movimento

revolucionario después de nuestra salida de aquí. —El baile

de máscaras en el Coliseo estuvo muy concurrido y elegante.

Dra 26,—Satió Tudalecio Vidaurri para Monterrey, y con

Ceballos, les envié periódicos a Tonchita Barragán y a las

niñas Nieto. El Gobernador Aguirre dió orden a las auto-

ridades de Catorce, para que los préstamos hechos al ejér-

cito del Norte, los paguen de su bolsillo. listo ha exultado

mneho los ánimos, y no causaría asombro si antes de nues-

tra salida de aquí se hace una diablura con Aguirre.— Se

dió orden para que mañana toda la fuerza ocurra a la misa

y Tederm que se celebrará en el Santuario de Guadalupe

—El Obispo oficiará.

Dia 27.—Gran función de iglesia en el Santuario de Gua-

dalupe—Toda la fuerza armada concurrió, y el sermón del

Reverendo Fraile no fué sino un discurso político—Nada

de nuevo y todos preparándonos para salir de ésta con di-

rección a nuestra querida frontera—Llama la atención de

todos el crecido número de frailes, pelados y pu...—Llegó

D. Fernando Garza y el Lic. Verea, de Monterrey.—Estor

algo enfermo.

Dis 28—Nada de Correo de Nuevo León y Coalmila, gra-

cias al señor administrador del Saltillo—Iegó Rivas, de

Monterrey, con sus carros.—Se dió orden de marcha al 27

regimiento—Mañana saldrán.—Los polosinos lamentan la

salida del ejército del Norte, y el único que se alegrará de

ello será el Gobernador—No hay duda que la venida de las

fuerzas de Nuevo Teón y Coahuila, salvaron a esta hermosa

eindad.

Marzo 1. Salió el 2% Regimiento para Nuevo León y

Conimila.—No llegó el Corrco ordinario del Saltillo y Mon-

terrey —Grandes bailes de máscaras en el Coliseo y en la

Tonja.—No fuí a ninguno, pero supongo, por lo que me di-

O Biblioteca Nacional de España

MENORIAS DE LA GUERRA DE REFORMA E

cen, que el de la Lonja estaría muy elegante—La corrida

de toros estuvo my divertida, y los toros salvaron la valla.

Día 2—Nada de Correo del Saltillo —El Gobierno Gene-

ral dispone que los cabecillas Oton y Alfaro, sexn entre.

gados al Juez de Distrito para ser juzgados conforme a la

viltima ley de conspiradores.—Morirían, si esta ley se hicie

va efectiva contra ellos—El Sr. Vidaurri puso oficio al Juez

de Distrito, poniéndolos a su disposición—Los demás ofi-

ciales prisioneros serán remitidos a México—Casi todos de-

scan irse con nosotros, pero se les contesta que no hay or-

den del Gobierno para hacerlo—Se corre la voz que Garra

y Gareía se han promneiado contra el nuevo Gobernador y

Comandante General Moreno, nombrado por Comonfort, se-

gún el Estatuto Orgánico—;Pobre Tamanlipas:—En qué

manos habéis endo.

Día 3.—Lox oficiales que se llevan prisioneros hoy die-

von su palabra de honor, que pasarán a México, sezún lo

dispuesto por el Gobierno Gencral.—Oton y Alfaro serán

juzgados aquí—Los más de estos oficiales son jóvenes pa

taratos que sin saber lo que hacían se metieron en una re-

volución con objeto de medrar—La certidumbre de no ser

castigados es el secreto de que tengamos tanto revoluciona-

vio en México—Mañana da el Sr. Vidaurri un baile x las

familias de esta ciudad, para corresponder al cariño que le

lun demostrado a él y al ejército del Norte.—Pusado ma:

nana saldremos.

Dia 4—Gran haile esta noche en el Coliseo—Se dió or-

den de mareha al 3er. Regimiento para que salga mañana

—El Coronel Lama exsegindo en Jefe de los pronunciados

en esta plaza, nos acompaña a Monterrey. —Vorias familias

se trasladan también de aquí a Nuevo León.

Dia 5.—Anoche Negó extraordinario de México con orden

para que Jas fuerzas del Norte continúen oeupando la plaza

O Biblioteca Nacional de España

10 DIAMIO DEL CORONEL, VALDES

mientras lega el General Moret con la fuerza que la deba

cnbrir.—Se dió contraorden de marcha.—Llegaron ayer tar-

de los Diputados Hano y Garza Melo, como también el Lic

Coronado—Eseribí a mi hermano "Timoteo que está en el

Saltillo. —El baile de anoche estuvo muy elegante y coneu-

rrido—El Gobernador Aguirre hizo las paces con el Sr. Vi

diurri, y pretende que en lo sucesivo sean amigos. ¡Quién

sabe...

Día 6.—Rivas sale mañana para Monterrey con parque,

balas de cañón, ete—Yade absolutamente de nuevo, si no es

<l alboroto de muchas familias que se quieren ir a la fron-

tera, y a quienes el Sr. Vidamri facilita carros, ete, para

que se trasladen-—Salieron los Diputados de Nuevo León

para Monterrey.

DíA T.— Anoche, la patrulla mató a un Alealde de esta

ciudad por equívoco, e hirió a unos 7 otros —Es lamentable

esta ocurveneía.—Eseribí a Daniel, Dn. Braynares y a Pan

chitu Zambrán.—Nada de nuevo en México.

Tia $.—Conejerto y comedia dedicados al Sr, Vidaurri, a

los: jefes, oficiales y tropa del ejército del Norte..-Se dió

orden para que todas lax familias que van para Monterrey

en box carros, estén listas para pasado mañana, el 10.—El

Ciobierno General dió el grado de General al Coronel Rivera

por los servicios que prestó en la toma de Son Lais-—Tgua-

los servicios hubiera prestado, si se hubiera hallado en la

Capital de México. — El Sr. Rivera uedo tuvo que ver con

la toma de esta plaza por el Ejército del Norte,

Día 9.—El concierto de anoche estuvo regular, pero el

teatro, la comedia y los bárbaros que la quisieron repre-

sentar, todo estuvo de los diallos—Los disparates de los

actores, y Ia crítica atrozmente vulgar de muchos, fué lo que

más llama la atención—Salió Rivas con sus carros carga-

dos de parque, ete. Fseribf a Texas, Orleans y Nueva

O Biblioteca Nacional de España

MEMORIAS DIE LA GUNIIDA NI: REFORMA La

York, Di libranzas en favor de Juan Clark por $100, con-

tra “El Galveston News" y de $50 contra “El Times” de

la Capita! de Austin,

Dis 10.—Se dió orden de marcha y mañana salimos, era

cias a Dios —En una refriega entre el peladaje y las tropas

de Rivera hubo 26 heridos, entre ellos 3 iujeres—El Go-

hierno General ha obrado cochinamente con toda esta fuerza,

y no ha sabido agradecer los sacrificios lechos por Nuevo

León y Coahuila en favor de las instituciones federales y

partiemlarmente de esta ciudad que logró salvar. La verdad

desnuda es, que en el actual Gobierno no se puede poner fe,

y muchos de sus actos públicos se pueden citar para probar

que uo será nunca nuestro amigo, El nombramiento que pa-

ra el Ministerio de Hacienda, acaba de hacer en la persona

de Juan Antonio de la Fuente, es un agravio y nn insulto

que <e le hace a Nuevo León y Coalnila.

Día 11.—Salimos de San Luis como a las nueve y media

y Megunos muy temprano a Bocas, 13 leguas. Nos acom

pañan algunas familias, y entre otras la del finado General

Jánvegui, el Coronel Tama, un padrecito aún muy joven que

por liberal le persiguen sns hermanos de San Luik—A los

cuantos minutos de entregar nuestra tropa a los prisione-

vos Oton y Alfaro, éste último logró fugarse, Se smpone

que el oficial de los mochos que los recibió estaba de acuer-

do con él—FHoy a las 3 de la tarde hizo un mes que el ejército

del Norte rompió los fuegos sobre la Plaza de San Luis, y

con haberla tomado la salvó del saqueo espantoso que la

amenaza.—La población sin duda ha quedado muy agrade.

cida, pero no así el Gobierno, cuya conducta no indica nada

favorable para la frontera. Se corría muy válida la voz en

San Luis, que D. Juan José de la Corea sería nombrado

Ministro de Relaciones. Si así smeede, sería un insulto

atroz que se le hace a Nuevo Teón y Coahuila. La voz pú.

Mica acusa a esta nulidad de peculado y de haber desem-

O Biblioteca Nacional de España

Les DIANIO DEL CORONEL, VALDES

bolsado grandes sumas del Tesoro público, y muy inmoral

debe ser el Gobierno que coloque en puestos distinguidos

a semejantes bichos.

Dia 12—Se hizo jornada al Venado, 12 ternas de Bocas.

—Moviznaba y hacía frío. Ayer llegó a San Luis el Cienerel

Moret nombrado Comandante General de este Estado, por

el hombre Comonfort—; Viva el Estatuto Orgánico Provi-

sional *—Sin embargo de la mixería y eseasez que nos acom"

paña, toda la fuerza va contentísima porque va para «11 casa.

¿Bendito sex el Estado de Nuevo León y Coahuila!

Dra 13—En el Venado nos quedamos hoy en consecuen-

cia de la muy grave enfermedad del Tie. Coronado que su-

frió un ataque cerebral que le iha a costar la vida. Se escapó

en una tablita, gracias a la aetividad del médico que acom-

paña a él y a mi primo D. Miguel Blanco. En la noche vi-

nieron algnnos señores acompañados de la música, y dieron

serevata al Sr. Vidanrri—Muy poca correspondencia de

Monterrey y de ningún interés.

DíA 14.—Salimos del Venado y llezamos a Laguna Seca,

diez lezuas—En el Venado se quedó el Lic. Coronado, ya

convaleciente, quedándose para acompañarle el Lic. Blanco,

el Dr. Castillo y varios otros. Coronado estaba fuera de

peligro. En Charcos comimos y se le dió un pienso a la cuba:

Mada. En Laguna Seca alcanzamos a Márquez, y los carros

de Gutiérrez van delante,

Dia 15.—Se hizo jornada a la “Presa” 15 leguas, sin no-

vedad.—Comimos en el “Represadero” y en la Presa alean-

zamos a las del Jer. Regimiento.

Dia 16.—De la Presa hicimos jornada al Cedral, 10 Je-

mas. En Matehuela alnorzamos y alcanzamos a Zayas—

Tn la turde que llegó D. Santiago, la población lo recibió

con el mayor entusiasmo. Cohetes, música, repiques a vue-

lo, ete.— Presencié un acontecimiento que me enterneció

O Biblioteca Nacional de España

MEMORIAS DE LA GUBIIA DE REFORMA 19

mucho. El pueblo en masa se agolpó a la casa donde se ha-

Vía hospedado el Sr, Vidanrri y en partidas de 40 y 50 en-

traba» a la Sala, le daban un abrazo ol Sr. Vidanrri y se

salían. Estos visitas consistían de liombres, mujeres y niños

e todas cluses y tamaños, la sineeridad del afecto de esta

multitud era evidente, y 1%. Santiago se mostró muy afable

con todos ellos.

Día 17.—Hlegamos a San Juan de Vanegas, 5 leguas—

Se perdió el día para que descanvara la remida.—D. José

María Alfuro que mandaba en Jefe las Merzas de los reac

cjonarios enando las fuerzas de Nuevo León y Coalmila to-

maron posesión de la plaza, fué aprehendido hoy en compa-

Tía de D. Rafael Marragón, que también había pertenecido

a las filas de los reaccionarios—A éste último se le había

dado pasaporte en San Luis para que en el término de 25

días se presentara en México, sezún lo prevenido por el Su-

premo Gobierno, El Sr. Vidamri remitió a los dos a Cedral

pura que de ese punto sexn conducidos a San Luix Potosí.—

Mfaro teme mueho que Moret, quien ahora es Comandante

General de Sun Luis, nxe de alemua arbitrariedad con él.

Le puse oficio al Ministro de la Guerra y al Comandante

General de San Tas, de todo lo omrido.—Alfaro, ex toda-

vía hombre en la for de sn edad, pero según dicen, mea

será de ningún provecho al país.

Dis 1SDe Vanegas al Salado, 16 Jezuas, y Megumos

temprano con un polvo y aire que nos mortifico muehísimo.

—Bn la tarde se soltó el Norte con agna y la noche extá bo-

rraseosa y amenazante—Esta mañana soieron Alfaro y

Purragún para el Cedral, y de ahí pasarán a Sun luis Po-

fusí, xi en el camino no les pintan un venado a los de ln es-

colta que los custodian. —Altaro se mostraba miy abatido y

desanimado—Aquí se concentraron todas las familias que

nos acompañan, la del Anado Táuregni, la de Martínez de

Castro, la de Camacho, ete,, ete. —Sin novedad,

O Biblioteca Nacional de España

a DIARIO DEL CORONEL VALDES Y

Día 19.—Llegumos a la Encarnación, 16 leguas de sol y

polvo. La mayor parte de la fuerza se quedó atrás, porque

la remuda viene en mal estado.

Dia 20.—Se hizo jornada a Agua Nueva y Negumos como

a las ? de la tarde, 14 Jeguas—El Sr. Vidanrri determinó

que yo me adelantara para osenciar 500 pesos en el Saltillo,

para socorrer a las fuerzas de la frontera de Coahnila. En

la noche Negué a Buenavista, 6 leguas,

Día 21.—Llegué a Saltillo y con D. Tuis Cepeda arregló

el préstamo de los 500 pesos.—El Sr. Vidanrri con su es-

colta Megó a las 11, y se pasó a la Rinconada.

Dix 22.—Salí del Sultillo a las 4 de la tarde, y pernocié

en el Jural en casa de un canalla que se Numa Tenacio Suto.

Dia 23.—Megué a Monterrey a las ocho de la noche y me

encontré con la familia de tía Tulita enferma de viruela.

A Tula chica se le murió su hijito Pancho ¡pobre criatura!

Dia 24.—tiastó el día en visitar a los amigos, y por el Co-

rrey de Matamoros, veo que me suponen muerto. Con este

motivo Juan Sánehez y Juan Pineda me dedican unos ver-

sos en el periódico, “El Ranchero;” que se pulilica en Mata-

moros.

DIARIO DE ACONTECIMIENTOS EN EL INTERIOR

1858, Jux10 15.—Hoy salió parte de la fuerza del 42 Re-

gimiento de Caballería, que bajo las órdenes del Coronel D.

Vudalecio Vidaurri, mareha para unirse con el ejéreito del

Norte—Ticieron jornada a Santa Catariva, sin novedad.

Día 16.—Toda la fuerza Negó a la Rinconada y antes de

las ocho pasó uu extraordinario del General en Jefe para el

Coronel Zuazna, y recibí carta de D. Santiago y Doña Jua-

nita.—En el Saltillo las contestaró.—Se enfermó padre Dic-

O Biblioteca Nacional de España

MEMORIAS DE LA GURIRA DE REFORIA *

20 y temo mucho que por su avanzada edad no sobreviva por

las fatigas de Ja campaña.

Dia 17.—Se hizo jornada a Ramos Arizpe, sin más nove-

dad que la de estarse agravando padre Diego en su enfer-

medad. Se envió al Saltillo por médico y un carruaje en que

llevarlo. Se agregaron algunos que vinieron de Monterrey”

a las fuerzas, Cecilio Gómez, ete.

Día 18—Se envió al Saltillo a padre Diezo un poco ali-

viado; paxó malo para Monterrey —Se gastó el día en hacer

ejercicio y tirar al banco con los ries de Seharp. En la

Noria me adelanté al Saltillo para agenciar algunas cosas

que faltan para la fuerza que envió D. Santiago

Día 19—Hegó la fuerza al Saltillo y se pasó a Buena-

vista. Se puso oficio al Comandante Militar para que ares

tara a D. Maximiano de León y lo remitiera a esta hacienda

por haber eireulado entre la tropa noticias con el fin de

desanimarlos y hacer creer que el enemigo era invencible.

Se escribió a D. Santiago.

Día 20,—8e recibieron 25 pistolas de Colt para la oficia-

lidad, y a más a De León se le puso en Vihortad después de

una regañada.—El Don ya había hecho lucha para qfe una

de tantas Ninfas de las que andan por estos ninudos de Dios

lo acompañara para que le hiciera los remedios. Fl Coronel

mandó que esta Ninfa de Venus se quedara, sin embargo de

la voluntad que tenía de servir en las filas del ejército del

Norte-—Se hizo jornada a Agua Nueva y se arreglaron en

parte algunas compañías—Se escribió a Monterres.

Día 21.— En Agua Nueva se distribuyeron las pistolas

de Colt entre Ja oficialidad, y se reforzó la fuerza con más de

treinta y tantos hombres que llegaron de Monterrey.—Se

arreglaron las compañías y se dieron a conocer varios oficia-

les. En la tarde se hizo ejercicio.

O Biblioteca Nacional de España

16 DIARIO DL CORONEL, VALDES .

Dis 22—Se hizo jornada de Ayua Nueva a la Encarna.

ción, y xe preparó la correspondencia que el 23 se despacha

para Monterrey y Zacatecas acompañado del derrotero que

llevamos, Ta fuerza va bien y deseosa de recibir noticias

de Monterrey 0 de Zaetecas, -

Drs 23.—Salió Justo Treviño de extraordinario para 7a-

entecas con carta para el Coronel Zuazna. Como ala ma

y media de la tarde Hegamos a locamontes. AL salir del

hermoso punto de Hocamontes la vista es hermosísima por

lo pintoresco de las montañas que de golpe se presentan a

la vista.

Día 24.—Día de San Juan, y cambiando de derrotero to

mamos el camino de Bonanza, Negumos a esta hacienda co-

mo a las tres de la tarde: la tropa se comenzó a enfermar

por el cambio de temperatira, agua, ete—En la noche hubo

serenata en honra de Doña Juanita, esposa del General en

Jefe del ejército del Norte, y madre del Coronel del 4? Re-

uimiento de Caballería, D. Indalecio Vidanrri. Se le dió

permiso a la tropa para que se puscara husta tocarse el si

Tencio. Formaron bailecito y se divirtieron a «u estilo.

Dic 25—En Bonanza, se despachó correo u Sierra Her-

mosa para advertirles a los correos que Meguen para esta

fuerza, el camino que deben tomar—En la tante se despa-

chó a D. Rufino Lavín con nn oficio y carta partientar para

D. José María Tzasi, Jefe Político de Mazapil, pidiéndule

$1,000, para las nrgencias de esta fuerza. El Administrador

de esta hacienda, D. Juan Tarda, nos trató a todos con el

mayor cariño y enballerosidad. En España fué Coronel de

los Mamados faecionos, Se contimaron tomando medidas

para el mejor arreglo ceonómico del Tegimiento

Dis 26.—Micimos jornada a Cedros, temprano. Aquí se

recibieron $265 que voluntariamente vos facilitaron los de

Muzapil, D. José María Izasi dando $100 de esta cantidad.

O Biblioteca Nacional de España

o Memonas De LA GUA DE IRFORMA "

Ne facilitaron mos quince calallos prestados por huy, y se

devolverán ul rendirse la jornada. Nuda sabemos de oficio

y corren muy válidas las noticias signientes: ¡Ovollos había

muerto en San Juis, de febre! Miramón había salido de

San Luis sobre Guadalajara, y parte del ejército del Norte

en Zacatecas xo movió sobre él y el resto sobre San Luis:

Ta Plaza de Durango había sido ocupuda por las fuerzas

federales y en el Tical de San Juan de Guadalupe se levan:

16 el peladaje y saquearon las casas de los españoles, To-

cas, ete.

Día 27.—Satimos de Cedros y dormimos entre la Cande-

Jaria y la Gruñidora, cerca del tanque de San Coste. En el

camino se recibió un correo de D. Juan Enstamante que tra-

do una carta de D. Juan Zuazua, fechada el 22 en Zacate-

cas, acompañando el derrotero que esta fuerza debe Mevar.

Confirma la muerte de Osollos'el 18 del que ríge y la salida

de Miramón para Guadalajara.—El Coronel Zuazua había

determinado moverse «obre San Tis. Nos Novió en la tar-

de y los campos presentan hermosas sahanas de zueato, le-

ña, ete

Dia 28—Pasamos por la hacienda “Gruñidora” pertene-

ciente a D. Manuel Serrano. Esta ha sido en tiempos pasa

dos una hermosa finca, según lo indica cuanto se ve, y ahora

están recomponiéndola con el objeto de «urtirla de wana-

dos, eahallada, etc,, ete. Pernoctamos cerca de la Encarna-

ción y nos llovió bastante en el día. Los uzostaderos por

todo esto son buenos, pero los indios no los dejan haver nin-

gnina cosa de importancia

Dis 29.—Pernoctamos en el campo entre la Encarnación

y San Andrés que es un honito rancho perteneciente a Sie-

rra Ffermosa, de la propiedad de los hijos del finado Conde

del Jaral. Los agostaderos som excelentes y bastante emrti-

dos de ganados, ete, ete. En la noche nos alcanzó un correo

del Sr. Znama que se hallaba en Salinas del Peñón Blanco

:

O Biblioteca Nacional de España

16 DIARIO DEL CORONEL VALDES

el 25 del corriente. Avisa que wnos quínientos del enemigo

habían estado en Charcas, y que avanzáramos con preenu-

ción: que el St. Aramberri con una ferza de caballería ha-

hía salido a perseguirlos y que esta fuerza avanzara para

Megar a su destino cuanto antes

Dis 30.—Pernoctamos entre Santo Domingo y San An-

dréx. Las noches muy frías y los xoles muy fuertes.

Jens Y.—Sesteamos en el tanque de la Manehat y al ha

cor alto da fuerza, se le fué el tiro a nn soldado e hirió a

otro en los lomos, Se le preparó una camilla y viene hustan-

te aliviado. Pernoctamos en el enmpo frente al Estribo.

Día 2—Antes de xalir Tegó mn extraordinario que viene

de San Luis y va para Monterrey, con la noticia de la to-

ma de San Luis por nuestras Merzas (1 30 del que finalizó. Al

Negar a Guanamé, las avanzadas dieron aviso de que habían

Ando vista al enemigo y ammque no xalió elerto, se notó su

entusinamo y aboroto en toda la fuerza. Pernoctunos en

Guaname, hacienda hermosisima, perteneciente y D. Do.

mingo Rasrón. Tiene hermovísimos agostaderos y una po-

Mación de 1,500 almas. En la noche legó un correo de

Monterrey, Nevíndole doce pistolas de Colt al Regimiento

de Zaragoza,

Día 3—Salimos de Guanamé y se hizo jornada a la Me-

dionda. En la tarde se adelantó el Coronel con un escolta

para Negar a San Luis y preparar enmicles, ote.

Día 4—La fuerza hizo jornada a Incas y yo me quedé en

el Hnisache. Llovió todo el día—aniversario de la Tnde-

pendencia de los Estados Tnidos.

Día 5.—Llegamos a Sau Luis, y la ciudad presenta un

cuadro Tastimoso. Los eriminales que la venpaban, la tie-

nen muy bien fortificada, y apenas se puede creer que tan

pronto se hubieran puesto en fuga tan luego como una parte

O Biblioteca Nacional de España

MEMORIAS DE LA GUENRA DE REFORMA OM

insignificante de muestra fuerza se hizo de dos de sus forti-

mes. Toda xu artillería, parque, etc., ete,, dejaron en la pla-

zi, y todo el material de ¿uerra es de la mejor clase. La

pérdida de nuestra fuerza fué insignificante, y esto prueba

que minca tuvieron intención los de la plaza de defenderla

como lo podían haber hecho, si consideramos lo ventajosísi

mo de todos los puntos que ocupaban. Seix meses habían

gastado en fortificar esta ciudad, y sin embargo de tanta

amenaza, tanto msulto atroz, tantas protestas de morir en

la demanda, en menos de tres horas de combate huyeron con

asombrosa cobardía y los primeros para hacerlo fueron los

principales jefes y oficiales. El hecho de ponerse en fuga

antes de estar la ciudad circunvalada fué el que salvó a la

mayoría de toda la fuerza. Cansa indignación y coraje el

pensar en la criminalidad de estos hombres, y México se

pierde si no se corta la manera de revolucionar.—; Dios sal-

ve a da iInfortunada patría'—Muchas han sido las atrocida

des cometidas a la xombra del tsalto y Dios quiera que Don

Santiago venga enanto antes,

Día 6.—Gasté el día en arreglar papeles para Revista de

Comisario y a ha Merza se le dió ma enarta parte de sus ha-

Derox vencidos —Vi a Minojosa y a ofros amigos, Al Último

My alguna esperanza. Celso Olivares recibió orden para ex-

pedicionar a la Fuasteca. Le van a faltar armas,

Dia 7—Se habla de despachar al 4 Regimiento a Que-

rétaro. Aquí está Aranda que con su Sección había ido a

Aynascalientes. Según aseguran, su condueta ha sido eri-

minalísima. Tratan de gpmeterlo u prisión.

Día 8—Moy xnldrá de Monterrey el Jefe del ejército del

Norte. Dios quiera que venga cuanto antes, pues los señores

Consejeros de D. Juan Znazua están emsando sraves per-

jmicios con sus intriguillas y chismes. Hoy se publicó un

Bando según el cual, el Jefe de las armas reasume el mando

O Biblioteca Nacional de España

"o ULAnIO DEL CONONÍL, VALDES

cívil y militar en el Estado, istituyendo con esto a mn tio-

bernador Constitucional. Tste hecho lo califican aquí como

un atentado atroz contra la soberbia de San Luis Potosi, y

uno creería que los consejeros de Zuazna se propontan per-

derlo con darle semejantes consejos. Fstos hechos, entre

otros, son los que han comenzado a alarmar a los más entu-

siustas del partido liberal mismo, y de ello se rezocija el ¿ne-

migo. Al enemigo se le ha presentado un flanco terrible

para que en el terreno de la lezalidad nos ataque con en

éxito. Asernran que hoy han Negado comisionados de Gua

najuato, y que Artengn mismo está aquí. Esta tarde fué fa

silado un infeliz, por el crimen de homicidio.

Dia 9.—Repentinamente xe dió orden de marelia, y xin

embargo de que la tropa ignoraba semejante orden, para la

una de la tarde toda la fuerza había salido de San Luis. La

Sección entera se compone de 1,800 a 1,100 ritleros a caballo

bujo las órdenes del Coronel del Ter. Regimiento de Nuevo

León y Coalila, D. José £. Aramberri. El 49 Regimiento

bajo el mando del Coranel D. Indalecio Vidanrri, forma par-

te de la Sección, En este Regimiento vienen los de Cvaluila.

Llevamos el mubo de Guanajuato con órdenes de persegir

y atacar el enemigo donde quiera que «0 encuentre. De paso

se irán restableciendo las autoridades constitucionales. La

Sección va a la ligera, sin carros ni vinguna cosa que ¡pi

dir la rapidez de sus movimientos. Ex una Sección formida-

ble por la clase de hombres que la emnponen y por la supe-

rioridad de sus armas. Tos amigos necesitan algo más de

Meros para derrotarnos. Quiera el cielo que al último 1m-

pere la voluntad del pueblo. Se recibió noticia de que los

reaccionarios con algunas fuerzas ocupan a Silao y Guana

juato. Para allá vamos—Se empieza n notar el contraste

asombroso entre los pobres y ricos—Se hizo jornuda a la

hacienda de Gogorrón cerea del Valle de San Franeiseo,

Dia 10.—Se hizo jornada 2 la célebre hacienda del Jaral

O Biblioteca Nacional de España

rent DS LA GITA NE: MEPON A E

enyo nímero de pobtadores asciende, según informes, a quin-

co mil habitantes. Esta hacienda es una de las más ricas

y hermosas en la República, y la pequeña ciudad que Neva

el nombre del Jaral tiene algunas fineas muy buenas y de

mueho valor. Esta noche parece una feria, y al vera nuestros

soldidos divirtiéndose, nadic supondría que andaban en

campaña. Además de Jas buenas casas e jelesias que <e no-

tan aquí, Hama la atención una Imerta que tiene cosa de

una Jeena de circunferencia. Todo el terreno de aquí a San

Luis está bien cultivado y llaman la atención las grandes

siembras de chile colorado.

Día 11.—Continuamos en el Jural habilitando la fuerza

con caballos, etc. En la tarde nos pasenmos en le muy her

mosa huerta y merendamos en el centro de ella, donde los

dueños millonarios habrán pasado tantos días de placer.

Quizá nunca soñarían en que los “vándalos del Norte,” los

enemigos de sus privilegios y fueros habían de s:r servidos

por sus criados un sus mismos jardines.— El efecto moral

que la presencia de mestro ejército causará en el intertor

será provechoso para el pueblo y quiera Dios que los resul-

tados sean dignos de los sacrificios bechos por Nuevo 1cón

y Coaluila—Temprano en la noche Hegó na comisión del

pueblo con la noticia de que nnos sesenta y cinco hombres

del enemigo se habían retirado de San Telipe, anoche a las

diez-—Los acompañaron el Cura y las autoridades conserva-

doras.—Que la tropa se hara retirado, no cansa asombro,

¿pero el Cura? ¿Será porque ha cumplido con las obliga-

ciones de xn ministerio ?—El clero es el enemigo más formi-

dable que tienen los pueblos y sus partidarios. — Nuestra

fuerza avanza llena de entusiasmo y confianza sin ni siquie-

ra pensar en que puedan ser derrotados.

Día 12—Se hizo jornada de la hacienda del Taral a San

Felipe. Según buenos informes, la dicha hacienda del Jaral

es la primera en la República, y su dueño es un verdadero

O Biblioteca Nacional de España

2 DIABIO NEL CONONEL VALDES

tiramielo entre xs vaxallos, La especie de esclivitad que se

nota en estas haciendas, es mucho más ofiosa que la que

existe en el Sur de los Estados Unidos. —Temprano en la

noche vinieron varios partienlares a visitar al Coronel Aram-

berri, y entre ellos dos de los Viearios de esta Villa. Cam-

suba asombro e indignación vír a estos señores confar mu-

chíximas anécdotas para ilustrar el genio y carácter de su

Cura párroco D. José María Espinosa, natural de uno de

los pueblos inmediatos a Morelia. Newin la verídica reta-

ción de estos señores, el Cura celebra los santos oficins cada

y enando xe le antoja, comenzando Tas ceremonias a las on:

ce de la noche y a puerta cerrada, Uno de los Viearios en na

de estas solemnidades, legó a sorprender a dos pecadores

queriendo enmplir con el mandato de vivir y multiplicar, y

aque el dicho Vicario envió al hombre a la cáreel, por in

flujo del mismo Cura fué puesto en Tibertad, quien también

suspendió al Vieario por lo que había hecho. El delincuente

era el Jefe de una especie de Cofradía establecida por el

mismo Cura, bajo el nombre de Ja Santa Conferencia. y sus

miembros son otros tantus espías en la población. Por los

pormenores que los Vicarios nos dieron, la conducta de este

prelado ex la más adecuada al objeto de corromper y funa-

tizar a lax masas, y semejantes prelados son más perjudieia-

les a Ta sociedad «ue lo que podía serlo un ladrón de camino

real. —En el camino encontramos un gran número de muje

res con muy pocos hombres, que iban de los ejercicios, y tam

diextras en sus «mpersticiones que como uno de nuestros of

ciales Jes dijo que cantaran las alabanzas, se soltaron

cantando todos a mn tiempo. Esta gente está para ser civili-

zada, y verdadera libertad no puede haber entre tantos igno-

rantes que elezamente obedecen a un clero tan corrompido.

—En la tarde llegó un carro de parque, escoltado por algu

nos de Monelova.

Dia 13.—La casa que se les dió a los dos Coroneles y a «us

planas Mayores, pertenecen a uno de los santos padres de

O Biblioteca Nacional de España

MEMORIAS DE LA GEFNRA DA REFORMA =

esta Villa, y es un verdadero palacio— Cuando considera-

mos el Jujo asiático de muchos de estos Tumilles pastores,

nada tiene de partienlar que todos los «el alto elero se hayan

convertido en eamspiradores—Esta mañana Tegó un ex-

traoninario de Guanajuato con la noticia de haber evaena-

do la plaza con sms ferzas el General reaccionario Mora y

Villamil, tan Juego como supo que nos acereíhamos. Ke cree

según informes que los dignos apóstoles del absoltismo,

se están concentrando en México—El Cura Espinosa, de

esta Villa, fué arrestado hoy, y mañana bajo xegmra ensto-

dia sadrá para San Tais Potosí. Este prelado 05 un cons

pirador consumado, triste de él xi lo juzgan según Tax leyes

de conspiradores. Causa asombro lo que cuentan de este

“Ministro del Señor,” somo también los medios que ponía

en juego para mantener viva la oposición al Gobierno —Es-

ta tarde se restituyeron las autoridades constitucionales con

Tax solemnidades de estilo, cohetes, música, repiques a vuelo

y muebos vivas a la libertad, a la Constitución de 57, al cau-

dillo del Norte, a los Coroneles de mestra Sección y al pue-

blo soberano.—Se recibieron periódicos de Monterrey, Za-

entecas, efe. Pero nada de partienar se nota en ellos. —De

Sam Tatix sabemos que el Coronel Zuazua despaeha deste

rado a la frontera al Obispo de Sau Latix Potosí y 36 frai-

les. ¡Qué primor!

Dias 14 y 15—Hicimos jornada al Rineón de Ortega, ho-

mita hacienda perteneciente a D. Domingo Sota de Guana-

junto. En la madrengada de hoy salió desterrado para la

frontera el cura de San Felipe D. José María Tespinosa

¿Qué diría exte hombre perverso xí la jugaran según las

leyes vigentes de conspiradores? Unos enantos malos sacer-

dotes como éste, cansan más daños que todos los militares

espadachínes en el país —Nos acompaña el padre Traspeña.

por cierto el clérigo más descamisado que he conocido en mi

vida. Quiere que nuestro Coronel lo nombre Jefe Político

de Guanajuato, para poner dos batallones sobre las armas.

O Biblioteca Nacional de España

E DIARIO DL CONONEL VALDES

y arrancarle al elero todo el dinero que necesitamos, uo hay

peor enña que la del propio palo.—Pasamos la Sierra de

Guanajuato que es riquísima por su abundancia de pastos.

agua y maderas. Es camino durísimo y muy escabroso—

Para entrar a Guanajuato pasamos por la muy célebre mina

de Valenciana que ha enriquecido a tantos hombres, y que

ahora se encuentra casí en ruinas. Las ruinas mismas indi

cau ue han visto brillantes días —Como a las 5 de hoy 15,

entramos a la ejudad, y frente al Palacio nos rodearon miles

del pueblo que nos vitoreahan a porfía. Se notaba en sus

semblantes una mezclura de esperanza, alegría y enrioxidad.

—Mora y Villamil, con Licénga y mos 200 hombres están cn

Frapmato, y al aber que nox mírimos, sin duda tocaron lav

de Vitindieo.—Los Coroneles ocupan el Palacio del Gobier-

uo que es mua soberbia fuea, hecha con mucho gusto y muy

hien amueblada.—Avu la gente de criterio parece que está

azorada al vernos, y no pueden emprender cómo había sida

que tantos hombres de humildes trajes han derrotado y pues-

to en evidencia a tanto espadachín de golillas y aparejos

bordados.

Dis 16.—Se despacharon correos para San Tatis, Guada

Jajara y Morelia.—Se recibió noticia de que Licéaga, Mora y

Villamil y toda su ehmema, continan su fuga rambo a Que-

rétaro. Y todo esto antes de movernos de aquí. Si después

de esto, hay necios que crean que los tales militares valen

un pito, los que tal cosa erean deberán ser o muy tontos o

muy pillos.—Se vecibió noticia de la toma de Durango, el 7

del uetual por los de Chihualma y Zacatecas, bajo las ór-

denex de mi amigo D. Estéban Coronado. Con este hecho las

operaciones se reducen al centro de la República. — Fuí

mos esta noche al teatro, y el paleo del Gobierno lo ocupaba

el Sr. Aramberri con varios oficiales y vo, que lo acompa-

ñamos. La concurrencia nos observaba con una curiosidad

muy notable, y por cierto que esta gente no tiene una ver

dadera jdea de lo que es el mundo. No hay que dudarlo,

O Biblioteca Nacional de España

MESIORIAS DIE LA GUBIIEA DI REFORMA E

ha impostura y el charlatanismo son las dos cosas que han

inperado en el país, y nuestra sola presencia en el corazón

de la República, será prácticamente provechosísina para las

diferentes clases de la socledad.—Se despacharon cartas a

Monterrey.

Día 17.—Las familias empiezan a suponer que no romos

tan salvajes, y esta noche D. Manue) Canal me presentó a

la familia de D. Pedro Anda, hombre liberal y muy decente.

Doña Carolina, si señora, es mujer interesantísima y canta

con mucho gusto-—Muchísimos se han presentado ofrecien:

do sus servicios y todos se los hemos despaehado al Gober

múdor Rodríguez. Algunos hay sido, no hace muebo, ofieioles

en las filas de Zuloaga, y el descaro de estos hombres que

<a creen decentes, nos prueba la general corpción en esta

parte del país—Recibimos impreso el parte que el peladito

Miramón le da al allador Zulwiga fgiendo que el 7 del

corriente derrotó al Sr. Degollado cu la baranca de Aten-

quigue, Lo que bay de verdad, es que a este espadachín men-

tiroso, e fué peor que en Carretas—El Gobierno de este

Estado facilitó 15,000 pesos para socorrer la fuerza con

cuarta parte de su haber.

Drs 18—Hegó correo de San Taix sin traer nada de in-

terés—Los ánimos se han tranquilizado completamente y

el gentío en la plaza hoy fué inmenso por ser día domingo

que es cuando vienen los operarios de las minas con el fin

de oir mia y haeer sus compras para toda la semano,

Día 19—Salieron 600 hombres con Dávila a situarse en

León, y 300 con Galán a situarse en Trapunto.—Se recibio.

ron comunicaciones de Zuazua, y encarga mucho que se le

envíen recursos. Nos hallamos en una posición de porler ha.

cer mucho en bien del pueblo —El actual Gobernador don

Francisco de P. Rodríguez, diseusta mucho 2 los liberales

con sus medidas, y os casí seguro que la Diputación perma-

mente lo removerá.—El Sr. Berduzco sería nombrado Goher-

O Biblioteca Nacional de España

Ea DIARIO DEL CONONES, VALDES

nador si él quisiera, pero no conviene porque nos puede

servir mueho mejor en Querétaro —Aquí xe pueden sacar

recursos y se sacaron-—Excribí al Lic. Gómez en San Luís,

Día 20,—Correy del Sr. Muerta para que con estas fner-

zas so le sostenga en caso de atacar él con los de Michon-

cán a los de Acámbaro. Miramón salió de Guadalajara y no

sabemos si se dirigirá a San Luis, a esta cupitul 0. México,

—Pusé al salón del Congreso de este Estado, asociado con

el Lic, Lemus, para exponer 2-8. 4, como lo hice cuáles

eran tas miras del Sr. Aramberri, Jefe de nuestras fuerzas

respecto de la persona en quien debiera de recaer el nom

bramiento de Gobernador interino del Estado. Sux xeñoríns

se dignaron escueharme con la mayor deferencia e hicieron

snvas las ideas que avaneé en euanto a la única elase de hon

da Dre que en tan apremiantes circunstancias convenía que

empuñara las riendas del Gobierno para hacer frente a la

simación, Mis razonex tan se aprueban que hoy mismo reca-

y6 la elección en el St. D. Francisco Berduzco, que fué el

que tanto recomendó, seghn las instrucciones que me dió el

Sr. Aramberri. - Berduzco es hombre de fibra, Mustración,

probidad y liberal a prueba de bomba. —Ta mayor actividad

y energía se necesitan para que no nos echen a nadar.

Dis 2L.—Se despacharon exploradores por cuanto camino

Miramón pueda tomar. En San Enis supieron antes que nos-

otros aquí, que Miramón se había movido de Guadalajara.—

Ffnerta se ha puesto en movimiento, y los de Acámbaro al

saberla eracnaron aquella plaza. Después de todo, el objeto

del enemigo quizá será el de rennir todas sus fuerzas entre

Lagos y México con el fin de proteger al Gobierno Cuevo-

Znloaga.—El Sr. D. Pranciseo Berduzco, comenzó a fun-

clonar de Gobernador interino de Guanajuato, y de su ad

ministración transitoria expermnos los mejores resultados

Afueha ex la confianza que este señor me dispensa, y st nom-

bramiento en eran parte lo debe a las razones que en el seno

O Biblioteca Nacional de España

MENONAR DIE LA GURINIA DE MEFORNA a

del Congreso expuse para apoyar su elección—La población

se halla bastante alurmada aunque muy satisfecha por ha-

verles asegurado a todos que si avanza el enemigo, nosotros

mos saldremos, bien xen para retirarnos o para batirlo—Es

ta noche el Gobierno celebró una junta de las personas más

influentes, para que organicen una fuerza suficiente con el

tin de proteger los intereses de la misma población.—Sí hit

biera suficiente armamento sería muy fácil poner 2,000 hom

bres sobre las armas en menos de diez días. —*

Día 22—Se recibió parte telegráfico de León anvuciando

que el traidor Miramón había entrado ayer a Lagos, aña 00

se sabe el camino que tomará, xi para México, San Luis o

esta capital. Los de Acámbaro con Mora y Licéngo, Galindo,

Pérez Gómez y demás emma de traidores, se concentraron

a Celaya, tan huego como supieron que Huerta había hecho

una demostración contra Acámbaro con mil hombres. Elmer-

ta tiene mos tres mil hombres pero le faltan armas y dinero.

—Los de Veracruz, avanzaron a Jalapa y se supone que con-

timuarán sobre Puebla, donde el atroz Echegaray lat sido

relevado por el brnto ex-ministro de Zuloaga, Parra. —En Mé-

xico se impuso un préstamo forzoso de un millón de pesos,

y sin embargo de que se garantizaba su pago con los bienes

del Clero, no hubo quienes quisieran dar el dinero. Hubo

embargos, pero no Inbo compradores, y esta violenta medida

cansó un profundo disgusto—El Gubierno de los tahures, es

paduchines y suerflegos impostores se desmorona, y falta

que ver si los beneficios xerán proporcionados a los tesoros

gastados, y a la sangre vertida. —Se recibió orden de Znazun

para que nos replexíramos a San Luis y no será mientras

no sepamos que el enemigo xe mueve 0 no sobre Nan Luis.

Se despacharon órdenes 2 Dávila y Gulán para que se ve-

plegaran a San Folipe.—Escribí a Mean y a Pedro Hinojosa,

Dia 23,—El día entero se pasó en recibir las noticias que

nos traían y que llegaban cada media hora. —Miramón Megó

a León ayer con doscientos hombros y quince piezas, y según

O Biblioteca Nacional de España

E PARIO DEL CORONEL VALDES

otros, con 2,800 y doce piezas.—A las enntro de la tarde to-

da mestra fuerza estaba con brída en mano, y agnardando

por momentos la hora de marcha.—Es de notarse la éxalta-

ción de muchos particulares que a cada momento llezaban

para informarnos que tendrían que acompañarnos aunque

sn único crimen ora el de ser liberales exaltados. Entre los

muchísimos que nos acompañaban, se nota nl “cieguite” don

Juan Valle, el vate de Guanajuato, poeta de mueha capa-

cidad euva interesante conversación Indica talento y fino.

Es hombre exaltadísimo y de muy buena aceptación ani

entre la aristocracia de esta cindad. Entre otros nos aconr-

paña el muy liberal Gobernador interino de este Estudo don

Franciveo Berduzco, hombre de fibra y mucho espíritu pú

hico, además del reductor de la “Blasa” el Lie. D. Vicente

Méndez, hombre de dimensiones a la Iilipntiense, pero vivo

como ma avixpa.—Les cansó asombro a los habitantes cuan-

do vieron que a eso de las seis empezaron nnestros soldados

a desensillar como si no hubiese tal enemigo tan inmediato.

—Son las doce de la noehe, y estoy tomando este apunte en

Ta mesa del Palacio del Gobierno, donde úkaxes han sido ex-

pedidos por los secuaces de los partidarios del obsenrantis-

mo. El ronquido de los compañoros en los comedores y

piezas inmediatas, indica que descansan como todo hombre

de conciencia tranquila.—Llegó una comisión del Sr. Tuer-

ta, y el oficio que dirigió al St. Aramberri se expresa con

mucha energía en favor de que la revolución se Neve a puro

y debido efecto. La contestación que le dió va de uenerdo con

sas sentimientos. — La misma comisión pasa a San Luis

con el objeto de ver a D. Juan Zuarna sobre la misma ma-

teria. —Aun no sabemos si el enemigo vendrá para esta plaza

oirá para México. No sería difíeil darle un buen susto.

pero las malditos órdenes que tiene el Coronel Aramberri

lo amarran completamente, lo cual le causa la mayor pena

— Nuestros exploradores cubren todo el terreno de esta ciu.

dad a Silao y Teón, donde el enemigo pernoctó auoche.

O Biblioteca Nacional de España

naroRTAS DE LA GUBIRA DE REFORMA — 39

Día 24.—Entre hu once y doce del día comenzó nuestra

fuerza a xalir de Guanajuato tomando el camino del célebre

mineral de La Enz, que pasa por el cerro trozado.—El ene-

migo pernoctaba en Silao, cineo leguas de donde nosotros

estábamos, sin embargo de su superioridad numérica, todos

sus movimientos indicaban recelo, y, si no tuvieran sabido

como lo supo que nosotros no intentábamos defender a la

ciudad, por ejerto que hubiera tomado el camino de México.

La orden de San Luis para que nos retiráramos, enusó la

más justa indiguación entre tada la oficialidad y tropa, y

Aramberri con fundada razón sentía la oportunidad que se

le oxcaseaba de darle un golpe de muerte a Ja reacción. Fl

resaltado no podía haber sido dudoso por Jas ventajas que

el terreno prestaba, eran tan superiores que el enemigo hu-

biera tenido que batirnos en terreno escogido por nosotros

mismos. Nuestra retirada de Guanajuato sin (aviolentamien-

to) ningún motivo, ha sido mn trinufo para el enemigo, y la

orden que la motivó fué hecha de la ignorancia de los he

chos—Tal era la precaneión con que el enemigo avanzaba

«me con xa vanguardia traía una pieza de artillería. Todos

están convencidos de que si nuestros movimientos hubieran

indicado que intentábimos aguardar el ntayue, el enemigo

hubiera tomado el camino de México. Errónenmente se lle-

26 a creer en San Luis que el enemigo avanzaba sobre San

Jas cuando en realidad se concentraba para retirarse a

Querétaro » México. La precipitación con que evienó la

plaza de Acámbaro al moverse Huerta, nos prueba que el

temor es la idea dominante ex las filas del enemigo-—Nos

acompañan con el Gobernador una multitnd: de empleados

y particulares de Guanajuato,

Día 25.—A las 12 en punto salieron todas las fuerzas de

la Tay y pernoctaron en la hacienda de San Juan de los

Tdanow. El enemigo entró a Guanajuato, y tanto en León

como en Silao reclutó sus fuerzas con echar leva. Con un

movimiento nuestro en combinación con Huerta y los de San

O Biblioteca Nacional de España

» o DIANIO DEC CORONEL VALDES O

Luis, bastaría para que el enemigo tomara el camino de Mé-

xico—Pn la madengada Negaron varios del enartel general

de Huerta, y entre otros el Mayor General de la División de

Michoacán, D. Florencio Antillón. Los que le acompaña

rou son todos de Guanajuato, y Menos de entusiasmo. —

Sobra gente muy escogida para organizar fuerzas, pero fal-

ta armamento para ponerlas en pie—El Mineral de la Luz

ha Megado a tener una población de 30,000 habitantes cuan-

do en bonanza, y ahora tendrá de 18 a 20,000 almas—ll

Administrador me dijo que en diez años habían pasado por

sus manos $10.000,000*

Dix 26.—Se hizo jornada a San Felipe, donde la fuerza

se remió con los 900 hombres que con Dávila y Galán ha-

ban entrado en León e Trapuato—Los más de los señores

Diputados del Congreso de Guanajuato han legado y acom

pañarán al Sr. Herduzco, Se recibió noticia de Guanajuato

que hoy o mañana saldrá Mivamón para México, y que Li-

céaa, nombrado Comandante General, Megaría mañana:

los señores Berdnzco y Aramberri escribieron a Znazwa, ve-

eomendando que haga mn movimiento para amenazar a los

de Guanajuato, y si esto se logra, y el Sr. Huerta se mueve

sobre Celaya, el Bajío quedaría sin duda completamente

libre y entonces se podrían agitar toda clase de recursos por

ser lo máx rico del Estado de Ginanajuato.

Dra 27.—Han Hegado muchas gentes de Guanajuato y

San Laix. Los primeros, para librarse de los campeones de

Tn religión y gurantías, y los segundos porque ercen que los

héroes de Carretas y Atenquique avanzan sobre los atrin

cheramientos de Say Luix!! Ex menestor mucha eandidez

para erer esta última suposición. Aquí xe agiardarón ór-

denes de San Tarix antes de emprender mi movimiento. Ya

habrá calentado el Si. Zunzna los efectos que baje todos ex-

puestos catisó la orden que motivó la retirada de Guanajun-

to. y se arrepentirá de haber dado nu orden tronante que

ató de pies y manos al Sr. Aramberri—B9l enemigo, estando

O Biblioteca Nacional de España

MEMORIAS DE LA UEBIRA DE MEFORMA a

mil hombres nuestros en la Mina de la Luz, pasó a menos

de mua legua de muestras avanzadas sin atreverse a motes-

tarlas, y ahora bay más razón que nunca para creer que no

tenfan mi añ la intención de venir a Guanajuato. Ni mues-

tra fuerza hace un movimiento que indique que estamos en

combinación con los del Sr. Huerta, es muy probulie que el

enemigo emprendería su marcha hacia Querétaro y México.

—S8e le escribió anoche al Sr. Zuazua, pidiéndole recursos, y

esto lo harú pensar en las conseenencins de la orden des-

calellada que tanto sintieron todos mestros oficiales y sol-

dados. 1 Sr, Aramberri, a golpe de vista, caleuló fundada-

mente los resiliados de esta maldécida orden y con el

corazón Neno de amargura la mandó ejecntar—Nunea se

podrá justificar el Sr. Zuazua ante los que saben los motivos

que causó la evacnación de la plaza de Guanajuato, y es

de todo punto indispensable que pronto se haga nm movi-

miento para que el público que ignora los antecedentes, 10

snponzar que el temor fué el que motivó nuestra retirada—

Llegó el correo de Monterrey con fechas que alcanzan ul

23, y los alel hub de los Rojos me escribieron

Día 28.—En San Pelipe—Se despacharon correos a los se-

Toros Zaazna y Huerta, poniendo a este filtimo al tanto de

Tos movimientos que el St. Aramberri emprenderá con su bri,.

anda, y diciéndole que si puede huecrlo, que se mueva con

alguna Merz sobre la línea de operaciones que el enemigo

ahora ocupa. Moviéntose Fuerta simltánenmente con-nos-

tros que amenazamos a Guanajuato, entonces se podrá sa:

her xi el enemigo tiene intención o no de resixtir en el Tajío,

Tat falta de remonta sujeta nuestros movimientos y éstos

se emprenderán enel momento que Negue la caballería que

Fueron a traer unas partidas sueltas—Ayer salió Miramón

en la diligencia para México y "aseguran que ha xido desti-

tuído a pedimento del Ministro Tnglós en la capital. Tel han-

dido gaehupín Pérez Gómez, también salió para Silao con

2.200 hombres y 12 piezas. En Guanajuato se quedó Licón-

O Biblioteca Nacional de España

La pranto bil CoREXEL VALDES

yu con $00 y $ piezas de artillería —En Celaya el titnlado

Gobernador de Michoacán, Galindo, está reclutando fuevzas

de la manera que acostwabran hacerlo, por el medio odioso de

Teca.— El Sr. Borduzeo, Gobernador interino de este Ex:

tado se muestra enérgieo y resuelto a que el resmitado de la

presente Iucha no sea ilusorio sino que el triunfo sea verda-

deramente de provecho — Anoche, acompañamos varios al

Sr. Aramberri a una casa donde vna de las de casa, que

la Naman “Maruea” se sirvió complacernos con cantar con

macho gusto varias canciones acompañándose en la vilme-

1. Evan tres las señoritas, y al entrar el St. Aramberri,

le dijo con aparente reserva al Lic. Méndez, que las ninfas

que veríamos eran de corazón alegre, y bajo éxta suposición

se le dejó caer a mna de ellas, y comenzó con pellizear a na

de ellas, que contestó con decirle que se le había subido el

vino—El licenciado ereía amá era una modestia fingida

mientras la pobre muchacha bastante indignada se retiró

de él, para que 20 la continuara mortificando.

Día 29—En San Felipe—Pérez y otros, fingieron una

carta de desafío del doctor Varuero, hermano de las seño

ritas de anoche, enviada al Lie. Méndez, que iragó la píl-

dora, y todos se divirtieron muchísimo —Nada de partieu-

Jar ha venido, y se aguarda la remonta para movernos sobre

Dolores y San Mignel. Hegaron blusas y pantalones de San

las para la fuerza.— La tropa hizo ejercicio en el muy

hermoso Tano de la Jabonera

Día 30—En San Felipe—Se dió orden para que el Ter.

Regimiento marche a Dolores —Se recibió alguna caballa-

da, anmgue no la sufieiente.—El enemigo ocupa las mismas

posiciones de ayer-—Márquez, según dicen, avanzó subre

Acámbaro con 1,000 hombres—Por allá andan los de Huer-

ta.—Al salir para México el peladito Miramón, esenlonaron

toda su caballería de Trapunto ai Querétaro. — Casanova,

que está en Guadalajara dió parte de que sus avanzadas ha

O Biblioteca Nacional de España

MIENORIAS DE LA GUENRA DE REFOLNA “

hían derrotado a las del Sr. Degollado—Cartas de comer

ciuntes en Guadalajara aseguran que es falso, y que los

derrotados fueron los de Ia plaza.—Se han presentado sol-

dudos de infantería y caballería que pertenecen a Jus filas

contrarias.—Sin embargo de tanta bravata, nadie eree que

el enemigo se mueve sobre nosotros, y mheho menos sobre

San Luis —Se corre la noticia de que Znionga y sue cóm-

prices se han pronunciado por Manta Anna. Quiera el cielo

que sea verdad, y que el primer bandido de la República

vuelva de Turbaco—Aseguran que el bandido gaehupín de

Pérez Gómez, uo librará ningwna neción mientras el peladi-

to Miramón no vuelva de México 0 lo aguardan para el 2

del mes entrante.

Día 31.—En San Pelipe—Satió parte de la briguda rmm-

do a Dolores y mañana segnirá el resto de la Merza—El

enemigo xe movió ayer de Silao, sobre Trapuato, y volvió

otra vez a Silao a la una de la mañata de hoy. — Los sol

dados dicen que se volvieron porque Pueblita con algunas

fuerzas estaba on Irapuato—Empiezan a venir agentes del

Partido Liberal en México, con miles de cuentos para que

lox blusas avancen sobre aquella cindad.— Todos comien-

zan a hacer mérito para apoderarse de los destinos públicos

sin haber hecho lo más leve para que trimfe la causa de la

democracia.—Se despachó correo a San Luis, y escribí a

Pedro Hinojosa.—En Guanajuato han comenzado las per

secuciones más asombrosas, y de orto nos está remiltando el

mayor bien.—Las cosas xe van poniendo bien,

Acosto 1%—En San Felipe. Salimos como a las dica y

media e hicimos jornada a la hacienda de la Quemada, pro-

piola de un Malés Damado Roberto Crvil.—Queda Ata

hacienda a selx Jeguas de San Felipe y siete de Dolores Hi

dalo.—Fa Hovido todo el día y continña Noviendo—El se-

ñor Gobernador Berduzco se adelantó a Dolores, después de

haber dado orden a D. Juan Miranda, de San Juan de Tla-

m0. que con peonada compustera el camino de la Tluchiquera

O Biblioteca Nacional de España

La MARIO DEL CORONEL VALDES .

con el in de hacer ereer al enemigo que los nuestros en San

Luis avanzaban por ese camino con la artillería.—Foy, pro

piamente hemos comenzado nuestras demostraciones contra

el enemigo que se encuentra cu Silao y Guanajuato.

Día 2—8e hizo jornada a Dolores Hidalgo, a la cuna de

nuestra libertad, en la población en que al Cura Hidulgo

le ocurrió la idea de inmortalizarse con dar Jibertad a su

país natul que por tres centurías gemía bajo el yngo del

despotismo más sistemático que el mundo había visto.—

Anorhe, sin embargo de Ja ¡Muvia y lo borrascoso de la no-

che, muchos de los jefes y tropa de la fuerza se reunieron

frente de la caxa del Padre de la Patria y comenzaron su

música, cohetes y repiques a vuelo a lux once y media de

la noehe.—Hoy en unión de varios amigos, visitamos la ensa

del “humilde Cura de Dolores” y estuvimos en el enartito

que era el estudio del grande hombre, Ts un enarto pe-

queño enva entrada queda a la derecha del portón del 20

euán, y al entrar se ve frente a la puerta en la pared, la ala-

cenita en que ¿mardaba sus papeles. A da enlle cae da

ventana por donde Allende a caballo le dijo que venía de

San Miguel y que se habín desenvuelto la conspiración.—En

el enarto conversamos con mi viejito, único que ha queda

do, de lus que acompañaron al Sr. Hidalgo y lo conoeía muy

bien. Nos contó muehas anécdotas del Cura para indicar la

sencillez de su carácter y Tax virtudes que lo adornaban co-

mo partientar.—Pasamos por el Gallinero, que queda a la

vista de Dolores. En este punto del Gallinero fué la terrible

acción que se Libró entre Bustamante y Moctezuma, de la

cual nos cuenta asombrosos asesinatos.—El 4 Regimiento

se quedó en el Gallinero por estar mejor provisto de pastu

ras, cnarteles, ete., ete.

Día 3.—En Dolores —Se despachó una partida para reco-

ger caballada con el fin de reponer la de la fuerza que con

esta Tuvia so ha maltratado —Licénga, el Clobernador reac

cionario de Guanajuato, ha dado patentes a varios célebres

O Biblioteca Nacional de España

MEMORIAS DE LA GUENIA DE REFORMA 5

landidos para que éstos roben y asesinen a cuantos sean

conocidos por sus ideas Tiheralex—Las persecuciones contí-

múan, y muchísimos de los liberales de más representación

se han salido de la eíndad y aumentan la gran comitiva

que acompaña al Sr. Terduzco—Ulegó un comisionado del

St Degollado, que sufre la mayor escasez y tendrá que ve.

tirarse, xi mo lo reforzan los del Estado del Norte.—Bl señor

Huerta, da aviso con fecha 80 del pasado, que el renecio-

mario Márquez, con tres o cuatro mil hombres se hullaba

a diez leguas de Morelia, enya plaza se sostendrá si el señor

Aramberri evita que los de Guanajuato y Silao se incorporen

con los de Mánimez.—Ayer comenzaron a embarcar bagajes

Jos de sitas y Guanajuato, pero no sabemos qué cumino to

marán—Al emprevder ellos st mareha nos moveremos sobre

ellos—D. Sahás Iturbide nos recomienda a Muñoz Ledo

como reaccionario millonario que ha sostenido la renceión.

—Se despacharon correos a San Lnis y Morelia.—El señor

Zmazna, pone oficio para que se aprehenda a 1). Silvestre

Aranda, D. Tenacio González y otros jefes y oficiales que se

habían (quedado) fugado en San Luis—Llegaron los sc-

ñores Aranda, Guerrero y otros liberales de los perseguidos

en Guanajuato.

Dix 4—En Dolores Hidalyo.—Salió el correo para Zan-

7ma.—Pué aprehendido un explorador del enemigo bastante

célebre, amado Alegre. Permanccerá encarcelado mientras

Jus circnustancias así lo requieran.—En Ja tarde, el señor

Aramberri, varios jefes y yo, dimos una vuelta por las calles

de la población, y Ja Villa es sin dude por naturaleza, may

bonita, y los mexicanos la acertarían con poner aquí in ca-

pital de la República —El interés y la política sngieren que

así sea. y con el tiempo lo harán cuando se convenzan de

la realidad, que na de las maldiciones del país. es el he-

cho de tener los poderes de la Unión en esa ciudad de gari-

tos y Inpanares, Mamada México.—Tos porrazos duelen, y

al último abriremos los ojos, sin embargo de los infujos

O Biblioteca Nacional de España

2 DIARIO DIS, CONONEL, VALDES

bastardos que nos quieran continnar en muestra ceguedad.

—El enemigo continúa en Guanajuato y Sino, y nosotros

estamos pendientes de sus movimientos.

Día 5.—En Dolores Hidalgo —Salicron qminientos om

Tres a situarse en San Mignel de Allende—Llegaron los

exploradores de Guanajuato y Siluo—licéugn con xetecien:

tos hombres y siete piezas de artillería, continúa eu Guiana

juato—Los de Silao se retiraron ayer a las seis de Ja ma

hana, rumbo a frapunto. Se dice que se harán fuertes en

el convento de Santo Domingo, en Celuya—El enemigo

que estaba en Tturhide se replegó a Querétaro ul aproximar.

se Medina y Vega con sus fuertes partidas sueltas que ope

ran por esos rmmmbos.—Esta tarde se nombró un Consejo de

Guerra para que juzmne a nu tal Arsola, que en días pasados

asesinó en unión de otros en st hacienda a un licenciado Ta-

mado Dávalos —Este Arsola, es un desgracindo de muy eri

minales antecedentes, y las pruebas contra él son terminan.

tes. Después de asesinar a Dávalos robaron la hacienda —

Se le escribió a Zuazna por el correo ordinario dando aviso

de los movimientos enemigos y nuestros —E! St. Aramberri

trata de dar un golpe de mano a los de Guanijuato.—Ex pro:

Table que se Togre hacerlo,

Dia 6.—En Dolores Hidalgo.—Se recibió correo de Huerta

enearceiendo al St, Avamberri que haga nn movimiento con el

Ain de evitar que los que estaban en Silao se renman con los de

Márquez que estaban en Acámbaro. Probablemente intentan

hacerse fuertes en el convento de San Agustín, en Salamanca.

Si los segnimos, para evitar que le den un galpe a Fuera, te-

memos que dejar a los de Ginaunjuato a retaguardia. —El Con

soja de Guerra que juzgó a Arsola lo sentenció n sufrir la últ

ma pena enya sentencia se ejeentó hoy a las tres y media de

a tarde. El asesinato de Dávalos y el robo de sn hacienda por

exte infeliz fué plenamente probado, y el ajusticiado ern uno de

los mmehos eriminales que a la sombra de la Libertad come.

fen horrendos erímenes—PI Sr. Rentuzco, marchó 0 San

O Biblioteca Nacional de España

MEMORIAS DN LA GNEIRA DE REFORMA Lal

Mizwel con el fin de activar la cosa pública y agenciar algu-

nos recirsos que Tánta falta nos hacen. — Doña Agripina

también marchó a su hacienda del “Joyero”—Mañana mar-

eli el resto de la fuerza sobre San Mignel de Allende.

Día TA das ocho y media de la mañana salimos de Do-

lores e hicimos jornada a Sau Wiguel de Allende. — Para

cuando había Negudo ayer el Sr, Terduzco, el cura y varios

de los más ricos conservadores se habían fgado—En la

tarde Namó el St. Berduzco una Junta de lox principales

vecinos, y les hizo presente la necesidad que había de facili-

far veinte o treinta mil pesos para estax fuerzas; que dicha

cantidad xería religiosamente pagada por el Estado de Gua

majuato; y que si por algún evento el Estado no lo hacía, en

cs caso él, Francisco Derduzco, personalmente respondería

por la emmtidad que le facilitaran —El movimiento de Fruer-

ta xubre Acámbaro, y el muestro sobre este punto, hizo a

Márquez retroceder a Celaya, al handido Mejía moverse de

Querétaro, y a la chusma del handido gnchupín Pérez Gómez

moverse también sobre Celaya—De este apunte amenaza-

mos a Guanajuato y Querétaro al mismo tiempo y en enal-

quier desenidada nos les metemos a una de estas dos impor-

tantos cindados.—Cartas recibidas de México que aleanzan al

29 del próximo pasado dando aviso de las estupendas intrigas

ya pestas en pie con el objeto de desvirtuar la revolución, y

arrebatar sus fentos de las manos de los que con tanta cons-

tancia y valor la sostienen y Mevan adelante. El pastel lo

preparan con el Obispo Munguía en nombre de los conser-

vadores y cristeros, y Traneisco Zarco con Lerdo de Tejada

en nombre del gran Partido Liberal. Quizá lograrán falsear

la voluntad del pueblo en esta vez como lo han hecho tantas

ofras, pero hasta ahora no hay que temer, mmnque no es

tiempo perdido observar con entma y desconfianza la con-

deta de tanto Maquiavelo en México—El enartel que se lo

dió al Sr. Aramberri, es la casa morada de D. Pepe Santo,

rico conservador que al aproximarnos la ahandonó, deján-

O Biblioteca Nacional de España

La DIARIO DEL CORONEL VALDES

dola amveblada con un lujo oriental.—Esto, ha de xer hu-

millante para estos hombres necios y fatuos, que xe creen

con derecho para vejar y despreciar a los menos favorecidos

por la fortuna que ellos—Todo esto es nada comparado con

lo que todavía verán antes de acabarse el “fandango.”

Dis $.—En San Miguel de Allende—Miramón y Pérez

Gómez fortificindose en Guanajuato. "todo este aparato de

defensa es con el único objeto de robar 30 0 40,000 pesos al

Mamado gobierno del tallador Zuloaga.—El Sr. Rerduzco no

ha logrado conseguir recursos, sin embargo del gran esfuer-

20 que ha hecho para conseguirlos.—Una uvanzada de las

umestras se firoteó con una de las del enemign y la hiza que

se refuriara en la hacienda del “Chamacuero”—Desde este

punto amenazamos y Celaya, Querétaro y Guanajuato a un

mismo fiempo.— Márquez en lugar de avanzar a Morelia se en-

tró o Celaya con unos doscientos hombres, se dice y se

cree que las fuerzas de Huerta lo batieron.—Si el enemigo

confiado en sux ventajas de número y artillería avanza sobre

nosotros, In resolución es la de dar una acción en las inme-

diaciones de esta ciudad.—Se despachó correo a San Tais

esta noche,

Día 9—En San Mieuel.—P1 enemigo en Celaya xe movió

sobre Salamanca con 200 dragones, dejando otros 200 en Ce.

Tava—El gmerrillero Riey de Morelia, entró a Salvatierra.

—Se despachó correo al Sr. Huerta.—A gardamos los movi-

mientos del enemigo para resolvernos a tomar In inicintiva

sobre Celaya, Querétoro 0 Guanajuato.—Eegó el correo or

diario de San Tas, sin traer ningnnas noticias,

Dia 10—En San Miguel—Llegó D. Vicente Vega y Ma-

tt con ns merillas ne se componen de nos 250 hombres.

me may bien armados.—Ta caballería enemign en Silao y

Celaya, se movió sobre Salamanca.—Márquez se movió tam

bién de Celaya tomando el rumbo de Toluca, y pronto sabre-

aos lo que habrá hecho el Sr. Fuerta—El Sr. García Gra-

O Biblioteca Nacional de España

_ MEMORIAS Di LA GUERRA DE REFORMA sl

nados fué hecho prisionero y puesto inconmniendo esta tarde

por orden del Gobernador Terduzco.—Despuéx de la trai

ción de Salgmanea, Granados secundó el plan de Tacubaya

en Sau Diego del Bizcocho—Esta tarde me envía el señor

Arimberrí a decile que se le va a juzgar según la Toy de

6 de Diciembre de 56.—El uensado alega que ex una caluin-

mia atroz Muventada por sm enemigo personal D. Antonio

Lianas, quien es un pícaro y vn malvado, según él dico. Ya

veremos mañana lo que sucederá.

Dí 11.—En San Miguel—Nada de nuevo con excep:

ción de la noticia volantona de estarse concentrando en Gua-

uajuato la infantería enemiga—Los que estaban compo-

niendo el camino de Tlachiquera por orden del Sr. Berduzco,

fueron arrestados por los de Guanajuato.—Notifiqné a Gar-

cía Granados que se le juzgaría según la ley de 6 de Di

clembre de 56.—El hombre todo lo niega.

Día 12-—En San Mignel.—En Gnanajuato continúan las

porxecusiones y el peladito Miramón les la impuesto un prés

tamo de cien mil pesos y otros tantos a los pueblos que están

bajo su dominio.—El Gobernador dió orden para que se in-

tervinieran los Vienes del enra de esta eindad, los de ino de

lox Lambaríz y los de todos enantos hayan tomado cartas

en favor de la reacción. Con semejante política xe pondrá

fina tanto provanciamiento—Salieron unos 500 hombres es-

tar muele com el objeto de sorprender a mos 200 del enemi-

20 que sé hallan en Buenavista, distante nnas mueve Jonas

de aquí. La intención es darles mi albuzo—Exta noche co

mo a las E e formó un alhoroto formidable en la plaza prin

cipal; au no sabemos el origen de este alboroto.—Por las

calles huían centenares de hombres y mujeres; los tiros, los

gritos, los entpes de los rifles, los cintarazos, y la obsenvi

dad de la noche aumentaban la confnsión y el peligro para

todos.—Et resultado fué que los nuestros, además de ma

multitud de heridos (?>—En los enarteles hay un gran nú

mero de pelados ne indistintamente los encerraban, y ya ve-

O Biblioteca Nacional de España

a DIARIO DEL CONONUE VALDES

remos mañana si será posible o no averiguar quiénes moti-

varon este motín que amenazaba haber dudo terribles resul-

tados.

Día 13—En San Miguel. —La expediejón que salió ano-

che tuvo st tiroteo con el enemigo en Santa Catarina más

aÑá de Puenavista. A los pocos tiros, cl enemigo huyó en

dispersión, y quince de los cien ritleros que los dispersaron

también pusieron en fuga a otra avanzada enemiga que esta-

ha en Santa Rosa, distante enatro leguas de Querétaro. Esta

avanzada de 200 hombres bajo las órdenes de Jiménez y Ro

cha, eva la fnien fuerza que el enemigo tenía Mera de Que-

rétaro por estos rumbos.—Este hecho pondrá en alarma a

lox de Guanajuato, Querétaro y demás puntos inmediatos.

—De Sau Tais nos escriben que hoy llegaba a aquella ciu-

dnd D. Santiago Vidawri, ¡Gracias a Dios! quizá se neti-

varán los movimientos de todo el ejército —El motín de ano-

che Mé obra de la casnatidad, según 10 que se ha averiguado

Tov.—EBl Coronel Aramberri, recibió orden del enartel 2o-

neral para que el Coronel D. Indalecio marche a San Luis

con un escuadrón por convenir así ul mejor xorvicio.—La es

eusez de recursos eomtinóa, wunque el Ni, Berduzco hace

cuanto puede para facilitámoslos.—Se presentó un ofieial

del esenadrón de Querétaro con diez soldados de los que fue-

row dispersados ayer en Santa Catorina.—Se volvió hoy pa-

ra conseguir que muchos otros se vengan, como lo desean.—

Tae armas y caballos de éstos es lo que más se necesita

Día 14.—En San Mignel.—Hiegaron enrrens de Morelia y

San Tais.—Fuerta entraba a Celaya antier con 2,500 hom

Wes y 13 piezas de artillería —Ayer lego el St. Vidaneri

de San Luis, y ordena al Sr. Aramberri que con toda la

fuerza <e concentre a aquella plaza, haciendo jornadas de

cinco a diez Jeguas diarias—Al ejeentar esta orden se des

truye la Tínen de comunicaciones que se había ubierto con

Puebiita y Merta—Fsta noche después de repiques y dia-

nas en los cuarteles, se sacó nn “gallo” con música, y se ceha-

O Biblioteca Nacional de España

amIONTAS Di: LA GUMAA DE MECORNA —-—-

Ton los vivas de costumbre a la Libertad, al pueblo y sus cam

dillos, ete—Salió Indalecio para San Tuis acompañado de

un escmadrón del 4 Regimiento, según orden superior—El

Sr. Vidanrri iuvita al Sr. Berduzco para que este señor pa-

<e a San Lis com el objeto de conforenciar sobre el estado

que guarda la coxu pública —Esto señor saldrá por la ma

nana.

Día 15—En San Mienel.—Salió correo para San Luis y

Morelia. — El Sr. Rerduzco salió violentamente para san

Lun a conferenciar con el Sr. Vidanrri—El enemigo salió

con toda xn fuerza para Trapunto y Salamanca.—El señor

Muerta envía na carta de un tal Ruiz en la que éste le dice

que de palabra el día 11 le envió a decir Pueblita que había

sido sorprendido y derrotado por el enemigo en Acámbaro.

—Por Jus fechas que tenemos de Pueblita mismo, estamos

convencidos de ser todo esto mentira.

Día 16—Salimos de San Miguel, y se hizo jornada a la

hacienda de (S,) la Erre—De paso vimos el muy célebre

Santuario de Atotonileo, que según aseguran es una de las

cnriosidades monisticas de ta República. Casi todo el tem

plo está Tleno de cuadros pintorescos al óleo, y algunos de

ellos son de muchísimo valor.—Todo cuanto uno ve en este

¡emplo, es nu indicio de la opulencia del clero cuando se fun-

d6 esta iglesia. Se presta a multitud de reflexiones Jas más

serias, y vale la pena visitarlo—Anardamos con ansias el

extraordinario de San Tais, y quizá se dará eontraorden

para no destruir la línea de cominicación con los de Michog-

cín.—Al despedirme de Lolita Nerduzco, me encargó mu

cho ax papí el Gobernador de este Estado—Lo ama en

extremo—De Querétaro se salió un número inmenso de fa-

mitias al legar los dispersos de Santa Rosa y Buenavista.—

TI moco Mejía abandonó la ciudad y nos creía ya a ems zo-

teras.—Dicon que Pueblita fué derrotado por el enemigo,

pero lo cierto parece ser que na de sms avanzados fué la

«que lo sorprendió—Por otro lado, el enerrillero Medina de-

O Biblioteca Nacional de España

“e DAM DeL CONONDE VALDER OO

vrotó completamente a una Mera que el enemigo destacó

de Trapuato para sorprenderlo, y en lugar de esto, Medina

los sorprendió u ellos.

Dia 17—Legnmos a Dolores.—AL Hegar nos encontró el

extraorinario Aguilera, de Sun Luis, y el Sr. Vidamri dió

contraorden autorizando al Sr. Aramberri, para que se pon-

gn en comunicación con las fuerzas de Michoncán, sin com-

prometer ningún serio encuentro de armis.—Se me nombró

fixcul en la causa que se le sigue a D. Vicente García Grana

dos, como: motor del promineiamiento de San Diego del

Tizcocho, secundando el plan de Tacubaya—Pl Sr. Vidan-

ri, suedere que el Gobierno de Guanajuato comience a or

emnizar la infantería, y que puede contar con el armamento

para elo, que Negará a San Luis para el 23 0 24 del corvien-

te—En Guanajuato celebraron hoy mestra derrota en Bue

murista, y semejante impostara nos reenerda lu época del

bandido Santa-Auna.—Lo que hubo fué, que parte de nues-

tra tropa dispersó completamente a ura avanzada enemiga

de 200 y tuntos hombres bajo el mando de Timénez y Rocha,

—Continuamos en esta mañana con el fin de agenciar re

enrsos.

Dia 18—En Dolores Hidalgo —Se recibió de Guanajuato

el parte que el general reaccionario Márquez al barajero

Zuloaga y al pelidito Mirunón, de haber derrotado a una

ferza constitucionalista bajo el mando de Pueblita, Ttur-

tide, Pinzón, Monacal y otros, cerea de Acámbaro y que se

compovía de 4,000 hombres, según el tal Márquez añmó.—

No hubo tal derrota, y en el enenentro de armas habido mu

da imbo decisivo. — Esta tarde fueron azotadas y tuzadas

ematro de las niñas de corazón alegre que signen a nuestras

fuerzas, sin embargo de las órdenes terminantes dadas para

que no se des permita que acimpañen q la “Bota” por los

duños que de ello resulta a toda la fuerza. Estas ninfas no

son tam virtuosas como la mujer de Julio Cósur-—Parte de

la fuerza está en el Gallinero y aquí agnardamos que el se-

O Biblioteca Nacional de España

MEMORIAS DE LA GUENIA DE REFORMA La

Mor Berduzeo regrese de San Lis, que quizá será pasado

mañana.

Dia 19—En Dolores Hidalgo —Llegó de San Lmis el se-

ñor Berduzco, smmamonte complacido de la entrevista cele-

brada con el Sr. Vidanrri.—Se organizarán por lo pronto

500 infantes y 260 lanceros —El tal Villameva, euyo sur

puesto influjo con Zuazna ex un perjuicio a la causa, vino

al Taral, la ejerció de Gobernador de Guanajuato, von to-

mar providencias exclusivamente del resorte del Ejecutivo

de este Estado. Semejante atentujlo indica un ntrevimiento

punible, y el Sr. Berduzco le puso una comunicación al señor

Vidanrri quejándose contra un hecho tan atentatorio. Con-

vendría retirar de la fuerza a mm meco tan desprestizindo

como 10 está el tal Villameva—Se corre muy válida la voz

de que el peladito Miramón «e ha retirado de Guanajuato

con toda sm fuerza, y si como aseguran, el movimiento la

ha hecho sobre León, en tal caso mestra fuerza no se mo-

verá sobre San Mignel sino que <e aproximará más al ene-

migo—Mañana se mueven en San Luis dos mil infantes por

el mido de Santa María

Día 20—Pn Dolores—Nada cierto sabemos de los movi

mientos del enemigo ni de los nuestros en San Luis, ni de

Fuerta.—Antier se quisieron sublevar dos compañías de las

del Río Grande, porque no se les pagan «us haberes.—Es nin-

cha la escasez que estamos enfriendo y es fuerza mn remedio

pronto o de lo contrario bien xe pueden temer las conse.

cuencias—No bastan promesas enando la tropa tiene nece

sidad.

Día 21.—Hegunos a San Miguel, y a poco mato después

de haber Hesido, Hegaron dos exploradores con la noticia de

«ue el enemigo estaba a cuatro Jeznas de aquí bajo el man-

do del meco Mejía, Márquez y otras, Esto: cansó xenia-

ción, y a las oraciones de la noche todas Ins casas y tiendis

estalian cerradas y apenas se veía una alma en la calle, Se

O Biblioteca Nacional de España

E DIARIO DEL CONONI, VALDES

dice, además, que el bandido gnehupín Pérez Gómez, avanza

de Irapuato a Chamnenero y que Tegará a esto último punto

esta noehe—Por otro ludo ke asegura que Lieénga por otro

camino avanza de Guanajuato, y de esta manera intenta en

corralarnos.—El peladito Miramón pasó ayer para Queréta-

vo. para pasar revista de las fuerzas de Márquez y Mejía—

Se recibió correo del Sr. Tíuerta, y Puellita en oferto fué

sorprendido por Márquez, pero Pinzón con sus surianos lo

avó sostenerse, haciéndoles cien muertos, diez y ocho prisio-

neros y quitándoles alemas armas y equipo. Después del

combate, Márquez regresó a Acámbaro y Celaya con menos

de la mitad de la fuerza que habín estado en el comite, y

se fué de paso para Querétaro —Esto prueba la falsedad

del parte que dió afirmando que había derrotado enatro mil

hombres bajo Jas órdenes de Pueblita, Pinzón, Thurbide, ete

—aAyor llegó a ésta, el Lie. D. Teodoro Bravo, con unos dos

cientos hombres y operará en unión de los nuestros.—Son

Jas diez y media de la noche y nada anbemos de cierto, la

fuerza entera está acuartelada, y nada teme. Si en efecto

se aproxima alguna fuerza, la hatiremos.

Dra 22—Pn San Miguel. —Tanto las avanzadas que esta-

han por el camino de Querétaro como por el de Celaya se

deseuidaron completamente y poco faltó para que a lus diez

del día nos sorprendiera en la plaza de San Miguel. Nues-

ta avanzada por el camino de Querétaro llegó a las orillas

de la cindad revuelta casí con el enemigo; ya se ofan los

tiros cuando toda la fuerza comenzó a ensillar, y con una

calma asombrosa comenzó a desfilar a paño ento y sin des-

orden. El cuemigo ya había entrado a la población y se ti

voteaba con una pequeña ferza de rifleros, cuando el señor

Aramberri y los que le acompañábamos montamos a eahallo

y paso a paso dimos vuelta a la esquina de la plaza, donde

nos anardaha el Gobernador Berduzco con su comitiva, To-

dos reunidos y con calma, tomamos la enlle para el puente,

y al Coronel Bravo se le dió orden para que protesiéndolo

O Biblioteca Nacional de España

MEMORIAS DE LA GUBNIA DS REFORMA E

algunos rífleros contuviera al enemigo, que por la misma

calle que íbamos se tiroteaba con una pequeña fuerza mues:

tra. Nosotros contimamos el camino a Cieneguílla donde

estaba purte de la fuerza. En las orillas de San Miguel, el

enemigo quizo cargar sobre los nuestros que protegían la

retirada, y los ritteros que protegían a los infantes de Tra

vo les dieron una descarga que los descompuso y les hizo

algunos muertos, Los Tanceros de Bravo aprovecharon el mo-

mento erftico, y enrgaron con tanto denuedo, que lex mato

ron algunos y les quitaron caballos, mosquetones, espadas

y otro pillaje. Les mataron 180 20 y el enemigo so retiró

en confusión del centro de la ciudad.—A las dos llegamos al

Santuario de Atotonileo sin que el enemigo desprendiera un

sólo hombre para seguirnos. En el santuario un infeliz fu

nático y ébrio les disparó un fusil a los lanceros y gritó “vi-

va la religión”—En el momento cargaron eomo fieras subre

él y lo hicieron tiras a Tanzazos—La fueva hizo alto, y a

las tres continuamos La marcho sobre Dolores, Eu la hacien-

da de la Erre se quedó de obxervación el escuadrón de Qui

ron, y el rosa de la Merza pernoctó en Dolores y el Ga-

Minero.

Dia 23—En Dolores —Entre las once y doce de ayer no-

che, se recibió aviso que el enemigo estaba en la hacienda

de lo Venta y tenfan intención de cortarnos la retirada a

San Felipe. Se dió orden de marcha, y a da una de la mar

Nanu empezó toda la fuerza a salir de Dolores tomando el

camino de San Felipe, De paso se incorporó la fuerza que

estaba en el Gallinero, y alas ocho y media de la mañana

Mexmos a Ja hacienda de Ja Quemada, donde la fuerza hizo

alto y descansó—En la tarde toda la fuerza avanzó a la

hacienda del Cubo que es punto muy ventajoso para mues.

tra elase de fuerza, y yo acompañó al Gobernador Tierduzco

a San Telipe, todos muy desvelados y eamendos—Como a

las oraciones de Ja noche, el Tic. Méndez alarmó a toda la

población con el enento de que el enemigo avanzaba, v pura

O Biblioteca Nacional de España

E DIARIO DEL CORONEL YALDES “ .

probar que él a lo menos lo erefa, ganó para el Jarul con la

carretela del Sr. Aramberri. El médico participó del susto

y con los enfermos salió en la noche para el Cubo.—Pronto

se supo que todo era mentire, como también que el enemigo

ui añn había estado en la Venta.

DíA 24.—En San Pelipe yo, y la fuerza en el Cubo—Nues-

tros exploradores cubren todos los eaminos por donde el

enemigo puede avanzar, y éste no se ha movido ni de San

Miguel ní de Guanajuato—En San Miguel se le han con

centrado con xix fuerzas, el meco Mejía, nombrado general

en jefe de Ja caballería, el bandido gachupín Pérez Gómez

y el peladito Miramón. Con la chusma que traen declaran

que destruirán a todo el ejército del Norte. Ya se les qui-

tará lo amargo de la boca.

Día 25—amoche durmió en el Jaral el Sr. Zuazua que

con seiscientos rifles más se incorpora mañana a la fuerza

que está en el Unbo, con el Sr. Aramberri.—El Sr. Herdur.

co contiuña con ht mayor actividad a preparar y organizar

fuerzas, aunque las que tiene y que pertenecen al Estado,

son en parte ma eliima de bandidos que para contenerlos

será menester matar a alminos de los Tadrones que figuran

entre ellos como jefes.—Con Trerduzco llevan elusco, pues

no es con quien podrán estos criminales hacer de las suyas

sin que les eneste muy caro.—Nada se sabe aquí de que el

enemigo se haya movido.

Dia 26.—Llegó el si. Znazna al Cibo con da Mera que

lo acompañaba, y tomó el mando de toda la fuerza.—Mañí:

mi se moverán de San Luis las infanterías con la artillería,

y pronto we comenzarán las opericiones ofensivas. No es

wi probable que el enemigo nos haga frente, sin embargo de

tanta beavata y amenaza de aniguilarnos.

Dia 27.—En la hacienda del Cubo.—En el día vinieron

el Sr. Berduzco y muchos otros señores con el fin de visitar

al Sr. Zuama—Alora se asegura que ni Mejía ni el pela-

O Biblioteca Nacional de España

MENOMAS DE LA GCBILA DE ENPONMA — 47

dito Miramón vinieron a San Miguel y que éste se encontra-

ha en Querétaro.—En la tarde se asegura que el enemigo se

había movido de Sau Miguel sobre Celaya—Mueha es la

mita que hun heeho y están haciendo buenos exploradores.

—Llegó el Dr. Duval de San Luis,

Dix 28—Salió el Sr. Aramberri del Cubo para San Luis,

y valverá dentro de tros o cuatro días.—Según informes tide-

dignos, en San Miguel y otros puntos se han cometido las

masores tropelfas contra las personas y bienes de los lihe-

males.—El guelmpín Pérez Gómez, ex el que más se distingue

en estus “hazañas *—EN partido liberal al último compren

derá la necesidad de abandonar sus necias medidas 2 me-

dias, y Ja de adoptar aquellas medidas terriblemente enér-

gieas que destruyan para siempre a esos enemigos públicos

conocidos en el país con el nombre de conservadores. -Flága

se Jeña de los huenos para quemar a los malos, pues sin Li

dertad no queremos patria ni hogar.

Día 2).—Ayor aguardaban en San Miguel al peladito Mi-

ramón y al meco Mejía.—Se asegura que de México han sa-

Vido fMerzas para engrosar las filus de los eristeros.—Valvió

Expínola de Ciénega de Mata sin conseguir caballada.—En

éxta, y las demás haciendas del Marqués, se sostiene la vene-

ción a todo france—Y todo hacendado en el país hará lo

mismo mientras no se le haga sentir que con hacerlo peli-

eran todos ellos en sus vidas e intereses.—Se recibió la noti-

«ia de la oenpación de Aguascalientes por un tal Patrón,

que lo hizo con unos 400 hombres que sacó de León.—En

consecuencia de Jas Tuvias que hemos tenido, no es probable

que el enemigo se mueva de San Mignel

Dia 30.—Hoy se movió toda la fuerza del Cubo al Jaral

para tener cuarteles para la tropa y pasturas para la caba-

Mada.—El Sr. Vidamrí, destacó de San Lnis ma fuerza.

que en unión de otra de Zaeatecas desmojaron de Aguasca

lientos al cristero Patrón, que el 26 del corriente entró a

O Biblioteca Nacional de España

E TIALO VEL CORONEL VALDES

dicha ciudad.—Se autoriza al St. Zuazua para que en caso

de quererlo él hacer, coloque ma fuerza entre Querétaro y

Suu Miguel en caxo de permanecer Licéaga en Guanajuato.

—Al último persuadí al Sr. Berduzco que en San Velipe co-

reía inuevesariamente peligro, y que era mejor que él con el

personal de sn gobierno se pasara al Jural dejando al Curo-

nel Tiravo con sus ebinuens en San Pelipe para que destacan

de avanzadas diera aviso oportuno en caso de aproximarse

el enemigo, lo cual no es muy probable—A las mueve de la

noche salió el Sr. Berduzco en unión de unos doscientos

particulares y empleados con una escolta de Janceros bajo

el mando de D. Mariano Garile de la Sierra de Gunmajuato.

Dia 31.—Hegamos a San Bartolo a la una de Ja mañana

Tabiéndose pasado al Jaral parte de los señores que nos

acompañaban.—Llegimos al Jaral a las de la tarde; y en-

contramos entre otros amigos al Lie. Gómez, que había ve

nido de San Luis con un dinero para dar ala tropa algún

socorro—En León está el amado general Pacheco forman-

do mn batallón con los que agarran de leva, y en la cárcel

de Tagos tienen 300 y tantos rolunfarios para sostener el

Mamado gobierno del talador Zuloaga.—El enemigo conti

nía en San Miguel, y 10 creo qe tenga inteneiones de vér-

selas con dos nuestros cuando ya estén todos juntos. —

La fulta de recursos todo paraliza, y mientras más diate-

mos nuestros movimientos, mejor para los renccionarios.

Tnox tres que se descrtaron del Enbo han sido asesinados

(dos de ellos) ex una de Jas haciendas inmediatas a éxta.—

To míxmo Yes ha sueedido casí a todos los ame se han legado

a separar algo lejos del golpe de la Mera—En exda ha-

condado, con muy paras excepciones, tenemos 1 enemigo.

Sermnes 1*—Parte de las fuerzas se movieron a la

hacienda de San Bartolo para que estén más inmediatas al

puerto del mismo nombre.—Salicron para San Tmix Jos ne-

forex Tháñez, Barrón, Mernández, Terrera, Diputados al

Ccngreso de Guanajuato—Según últimas noticias el ene-

O Biblioteca Nacional de España

. MEMORIAS DE LA GUERIA DE REFORMA E

migo contiuia en Sau Miguel, y aún estamos dudosos en

cuanto al rumbo que tomará—Se han presentado algmnos

desertores del enemigo, y dicen que annque en su oficialidad

se nota bastante entusiasmo éste no es el caso con la gene

ralidad de la tropa.—Sería de extrañar que no fuera así-—

Si Huerta se llegara a mover pronto tomando el emuino de

Toluca, la elmsma en San Miguel no sabrín muy bien qué

hacer, si consideramos las posiciones que nuestra fuerza hoy

ocupa,

Dia 2—En el Jural.—Se recibió impreso el parte que dió

el ymehupín Pérez Gómez de lo acuecido en San Miguel enando

muestra retirada de aquella eludad. Afirma que fuimos de-

imotados y quest caballería nos persiguió más de via le-

ca, que mos mataron 15 hombres y que venimos en dis

perxión. No puede haber mayor cinismo, y emisa asombro

cómo mienten estos hombiws—Nadie nos persiguió, ni tam-

poco perdimos un sole hombre en la retirada que se hizo.

Los mmestros Meron los que les hicieron, los chinacos a ellos,

protegidos por mios 17 de mestros rifleros—Se hallaron

Nay 500 mulas en la Ventilla, perteneciente a esta hacienda,

Texto hat xido un hallazgo porque mucha de nestra artille-

ría no se podía mover de San Luis por falta de mulns—

Ne retiró Jesfix Medina a su casa en Celaya con 13 hombres,

para sorprender a las diligencias enando sepa que vaya en

aleuna de ellas alzán personaje de los enemigos.—Los de

CGinanajuato, al último salieron a incorporarse con_log de San

Mignel, y todavía (ugen que ihan a San Luig, así como

dicen que todos nos replegamos a dicha plaza.— Nada

de cierto se sabe que el enemigo se haya iovido.— Lle-

26 Vélez, de San Lois, D. Pepe Aramborri se fé para

el Canelo a ver a sn familia por el término de quince

Mínx.—a los de San Miguel los llegó de México un refuerzo

de 500 hombres bajo el mando de Moreno. Dicen que su

ferza consiste de 6,000 hombres y 13 piezas de artillería.

—Annque sen verdad, al trabarso el combate verán que no

O Biblioteca Nacional de España

MALO VEL CULONEL VALDES .

son bastantes ni an para vérselas con los que tenemos en

este solo punto.

Dra 3.—En el Jural—Los informes dé Sau Mirmel, son:

que el enemigo saldrá mañana para Dolores, con el fin de

atacarnos.—Nada positivamente xe sabe de la fuerza que

fué a Aguascalientes, aunque en San Miguel se decía anoche

que en Lagos se habían visto a “los bInsas”—Salió la nm

Jada para San Luis, y de las 500, 250 se devolvieron al ad-

ministrador de esta hacienda, por inservibles.

Día 4—Contiunamos, enel Jaral, esperando correo de

San Tuis con la contestación del Sr. Vidmurri a uno que se

le puso esta mañana.—Ningún explorador de lus que ayer

se enviaron a San Miguel, ha regresado.—El Se. Berduzco

dió erden ul Coronel Bravo para que avanzara a Dolores.

—Continúa Noviendo, y los caminos se han puesto muy pe-

sados.

Dis 5—En el Jaral—Ayer a las 11 de la mañana vna

avanzada de 120 chinacos, bajo las órdenes del Coronel Tira-

vo comprometieron an lance de armas con el enemigo cuya

avanzada consistía de 800 y tantos hombres y dos piezas de

artillería —Esto sucedió en Trancas, y Bravo sufrio una

pérdida de einco muertos y algunos heridos. De los nmertos

se asegura que uno fué el pobre de Medrano y el otro su

peón de estribo, y que los dos estuban ebrios enya cirenns:

tancia les costó la vida —Tanto el Coronel Bravo, como cl

Coronel Antillón que con cien infantes estaban en San Teli-

pe, se replegaron a este punto y a San Bartolo donde están

parte de nuestras fuerzas.—Según informes, el enemigo no

avanzó hoy sobre San Welípe, y no se sube si toda su fuevza

vendrá para aquí, o la mayor parte de ella tomará el comino

de la Sanceda para Sau Tuis—Con el objeto de averiguar

esto, se han despachado buenos exploradores, y mañana sa-

bremos lo que pueda haber de verdad.—Ta fuerza que viene

por Dolores, se compone de 1,800 0 2,000 hombres y seis pie-

O Biblioteca Nacional de España

MEMONIAS DES La GUMIDA DE REFORMA si

vas de artillería. —Todos aplauden el mueho valor de los

chinacos en el encuentro de nyer, y por cierto que fué un

amoo celánd=seles el enemigo encima con tan malas armas

como his que tienen—Al enemigo le hicieron seis muertos,

y le quitaron ulgunas armas de fego, lanzas y caballos.

Tna de las lanzas del enemigo que me enseñaron esta tarde,

está hecha de franela colorada, y con letras amarillas tiene

las palabras “Religión o muerte”—El clero de San Miguel

los entusiasmó muchísimo, y causa asombro e indignación

la condueta de estos indiguos llamados Ministros del Señor.

Estos hombres son más criminales que el peladito Miramón,

el indio Mejía, el bandido gaclmpín Pérez Gómez, y demás

chusma de traidores que fingen defender la religión del Re-

dentor del Mundo. —Continúa lloviendo y los caminos se

han puesto malísimos para toda clase de operaciones mili-

tares.

Día 6.En la tarde se supo que el enemigo comenzó a

entrar en San Felipe, pero 19 sabemos todavía si vendrá to-

da sn fmevza 0 no—Ta entera fuerza enemiga se caleula que

cmusiste de cinco a seix mil hombres y treínta o treiata y

cuatro piezas de todos calibros—Para hacer frente a esta

fuerza tenemos dos mil hombres que están situados en el

Puerto y hacienda de San Bartolo, y en este punto del Ja-

ral.—Si el enemigo hace por forzar el Puerto se les dispu-

tará el paso mientras las fuerzas de San Luis que ya están

en Jas Pilas, nos avxilien.—De aquí a las Pilas tenemos 12

919 legnas con el camino pésimo en consecuencia de las

continuas Tuvias que tenemos de día y noche, Esto ha fa

vorecido al enemigo porque se difienltan las operaciones de

muestras enerrillas—Esta tarde se le dió orden al 4 Regi-

miento para que se embareara en el Puerto, y mañana al

amanecer, una guerrilla escogida hiciera por sacarse al che-

migo y retirándose los metiera al Puerto—El meco Mejía

menda la vanguardia, y se asegura que parte de la caballería

enemiga vino por San Diego del Bizcocho para atacarnos

O Biblioteca Nacional de España

- DIARIO DEL CONONEL VALDES

por retagnardia—Sin embargo de la superioridad mimérica

del enemigo, y sn artillería, nos atenemos a las ventajas del

terreno y a la superioridad de nuestras fnerzas en el mane-

jo de nuestros ritles—Al meterse el vol, xalió el Corvnel

Antillón con cien infantes para San Pranejseo—Los ehina-

cos, amnque anal armados pero más bravos que una perra

parida, operarán en unión de los miestros.—Se nota la ma-

yor confianza en toda muestra fuerza, y no tememos el ve

sultado.—Muchos particulares, y entre ellos muestro amigo

el Lic. Gómez, xalieron esta tarde pura San Francisco ran

Muego como se supo la ocupación de San Nelipe por Jas fuer-

zas enemigas. — Aguardamos que el enemigo se nmevar esti

noche o mañana, para mover la Fuerza que con el Si, Zuazua

ocupa esta hacienda,

Dia T—AL último se supo hoy que el enemigo con toda

la fuera se viene para Sun Pelipe, y el Puerto de San

Bartolo se dex dejará Libre moñana—Parte de la guerrilla

que esta mañana se destacó del Puerlo de San Bartolo, legó

hasta las calles de Sau Felipe pero no logró que el enemigo

To signiera, anque con el fin de traérelo al Puerto se ti

rotcó con Ta caballería que Tes salió at encuentro—Esta na-

che dos desvelaron con tiroteatlos, y mañana se (ponen ex

movimiento) xe incorpora a esta fuerza el 42 Megimiento,

y tada ln brigada se moverá al Valle de San Traneiseo en

cnyas inmediaciones se dará la acción en canso de continvar

el enemigo xi marcha xobre San Tuis oy escribió el se

ñor Vidwwrri, que sin embargo del mal tiempo, mañana se

comenzaría a mover con el tren para San Iraneiseo. — Pa-

sado mañana toda la fuevza estará venida, y se resolverá

definitivamente sobre lus operaciones ofensivas que se adop-

tna. —Continúa. Moviendo, y los caminos se han puesto

casi intransitables—A las once de la noche se recibió parte

que el enemigo con cuatro piezas de montaña se hatió con

parte de la fuerza en el Puerto a las enatro de la tarde, y

no hubo ninguna novedad.

O Biblioteca Nacional de España

MEMORIAS Di LA QUERRÁ DE REFORMA La

DIA SA las dos de li mañana nos movimos sobre la

Ventilla con la fuerza que estaba en el Jaral, y el 47 Regi-

miento se nos incorporó como a las onee de la mañana, sin

haber tenido ninguna novedad.—Al amanecer llegamos a la

Ventilla, y la fuerza se colocó en todos los puntos ventajosos

para resistir en enso de ser atucados, y para que descansara

después de la desvelada que nfrió.—Parte de la fuerza enc

miga entró al Taral esta tarde, y wma de sus avanzadas ma

16 aos infelices que venían del Jaral para esta hacienda.

—Se han colocado fuertes avanzadas entre este punto y el

Jaral, que está a tres legnas de aquí para que ataque a las

avanzadas cnemigns en caso de querer éstas aproximarse a

muestro campo.—A Jas ocho de la noche salió el Coronel

Uiravo con sus ehinacos, para que proteja a los cien infantes

que están cn San Praneiseo en caso de desprender e) ene-

migo alma Mera Vigera con el fin de hostilizarlos.—Los

acompañaron muehos partienlares para,que no nos sirvan de

estaria en-enso de trabarse un combate. — Son las once

de la maehe y el “alerta” de los centinelas es lo único que

indica la presencia de una fuera xrmada.—Nuestros sufri-

dos y valientes soldados ciudadanos, duermen: tranquilos

sobre me armas, y la eiveunstaneia de estar el enemigo tan

inmediato. no les cansa temor ni alarma—Esta noche hace

tres años que de Matamoros xe fugó el aventurero Adrián

Woll, y que se puso a salvo de nuestras garras con pasarse

al fortín Birozón en Brownsville, de Texas.—Entonces, como

ahora, Inchábamos contra tanto aparejo hordado y enton

cos como ahora, abrigúbamos la esperanza de poner algún

remedio a los males que agobian el puís.—Entonces era el

bandido Santa-Anna, y ahora es el barajero Zuloaga con

el peladito Miramón de general en jefe. Algún día se compa-

decerá el cielo de este país tan desventnrado—To único que

se puede temor es, que no resulten todas las ventajas que te

nemos derecho para esperar, y que el pueblo debe exiyir,

Dia 9.—Como a las doce de la noche comenzó a Hover y

O Biblioteca Nacional de España

E DIARIO DEL CORONEL VALDES

duró el agua hasta que amaneció.—Como u las dos de la

mañana empezaron a llegar exploradores con sus exagera-

ciones de costumbre, y afirmaban que el enemigo se movía

sobre nuestras líneas. A esa hora se dió orden de ensillar,

y que todos estuvieran sobre las armas—El río amaneció

tan erecido que no daba paso, y tuvimos que pasar por muy

cerca del enemigo para Negar a un punto en las ihmedia-

ciones de San Francisco y así pasar a este lado—Cuando

Negamos al Valle, ya las fuerzas de Lravo y Antillón se ha-

bían movido desde anoche sobre San Luis.—Después de des-

cansar un rato en el Valle, la fuerza pernoctó en la estancia

de Herrera.—Nos llovió toda la tarde, y a veces el aguacero

era asombroso par lo grande de las gotas de agun que caían,

—Mañana Negamos a San Luis, después de haher andado

de Merodes a Pilatos por más de cuarenta días—Yo, tan

mojado como un pato, vine a dar por nn equívoco a la ha-

cienda de la Laguna, ereyendo que en ella habría alcanzado

al Sr. Berduzco—En México continúan las intrigas por Ja

llamada fusión de partidos, según lo que aquí sabemos el

verdadero objeto que algunos de sus autores se proponen, es

el de desvirtuar y falsear la presente revolución como lo

han hecho con fodas las que hasta aquí se han puesto en pie

con el fin de establecer en México el verdadero sistema fede

rativo.—Los eternos enemigos de la democracia están con-

vencidos que con las bayonetas no pueden sostener su necio

centralismo, ni ann contando con todo el apoyo de los lla-

mados ministros de un Dios de paz y caridad, y ya que con

el ruido de las campanas y tambores no pueden destrnir a

los que con tanta constancia sostienen las libertades públi-

cas, vamos ahora poniendo en juego Ja intriga y la mala fe

para evitar el desarrollo de un principio que barrería con

sus fueros y exclusivismo—Ya veremos qué tanto tino des.

plezan los hombres al frente de a situación.

Dis 10.—Llegamos a San Tuis—Desde esta mañana co-

menzó a moverse Ja infantería y artillería, tomando el ca-

O Biblioteca Nacional de España

MEMORIAS DE LA OUERRA DE REVORMA 5

mino de la Parada y poner el campo en sus inmediaciones,

escogiendo con anticipación el punto de librar la acción en

caso de seguirnos cl enemigo, que ayer contivnaba en el Ja-

ral. Con este movimiento que causará miles de conjeturas

entre los que no pueden saber los planes del Sr. Vidansri, se

le da tiempo € las fuerzas del Lic. Blanco, para que reuni-

das éstas con la Sección que de Aguasealientes avanzará

a León, ocupen el Bajío y Guanajuato miemo. De esto re-

sulta, que al enemigo se le cortan sus eommicaciones con

México, y para conservarlas tendrá que dividir sus fuerzús,

en enyo caso se expone a ser batido en detall—La retirada

del Sr. Vidanri les ha causado risa a los gacimpines de esta

ciudad, y muy lejos estín de saber que esta risa pronto

se les convertir cn Tlanto—Ninguna fuerza considerable se

puede sostener aquí, por falta de víveres, y esta verdad ha

sido na de las razones que ha motivado el movimiento que

hor hizo el St. Vidamri, con parte del ejército.—Lo

que ahora importa es saber sí el enemigo avanza, o si retroce-

derá con el objeto de batir a los nuestros que en Guanajuato

quedan 4 su reteguardia.—Si nos da la espalda, la caballe

vía nuestra tomará la ofensiva, y entonces sí que sn destruc-

ción será segura.

DIA 11.—A las doce de la noche comenzaron a ensillar, y

para las dos, la terza se movía para la hacienda de la Pa-

rada.—Las fMerzas enemigas se hallan a siete Jeguas de esta

hacienda, y seguimos el movimiento de unestra artillería e

infantería para ver sí se logra que el enemigo nos siga, y así

logramos alejarlo de los nuestros que operan por Lagos y

el Bajto.

Día 12—Ta infantería y artillería hizo alto en la Parada

y la caballería en la hacienda del Corte—El enemigo co-

menzó a entrar en San Tatis y en el acto comenzó a evitar

que las familias continuaran «aliéndose de la cindad.—Tam-

bién comenzó en el acto a echar leva para engrosar sus filas

y miles de ambos sexos acompañan al ejército del Norte.

O Biblioteca Nacional de España

“ DIANIO VEL CONONBL VALDES

Dia 13—El Sr Vidaniri, con varios jefes recorrió el

enmpo, y se resolvió a aguardar en este punto de la Parada

al enemigo y probar la suerte de las armas—No tementos

las consecuencias y toda muestra fuerza está ganosa de vér-

selas con el enemigo.—Se recibió correo con Ja noticia de la

toma de Lagos después de haber derrotado a Patrón. —Se hi-

cieron algunos muertos y le hicieron más de cinenenta pri-

sioneros.—Toda muestra fuerza está reunida, y las posicio-

nes donde agnardan al enemigo se escozieron esta tarde—

Muchísimos voluntarios de Santingo y Mezquite, se han

agregado a muestras fuerzas, y nos faltarán armas para ran

tos que se están presentando.

Dia 14.—So movió toda la caballería y parte de la infante-

ría sobre Ahualuleo a tomar posiciones y estar listos en caso

de «ntir el enemigo de San uis.—Si uo sale mañana, es pro-

dable que ya uo saldrá, y en tal caso nadie podrá saber el

tienpo que dure una guerra que está acabando con el país.

—El Sr. Berduzco me dijo que tenía intenciones de nom-

brar a Pedro Hinojosa Jefe de las fuerzas de CGinanajuato, y

en tal caso me he resuelto a acompañarle,

Dia 15.—Continuamos en la Parada, y el enemigo no sale

de San Luix—Todo está preparado pura el combute y xi el

enemigo no sale pronto, en tal caso el ejército del Norte to

mará la intelativa—Se dió orden para que todos los indi-

viduos smeltos que signen al ejército se retiren del campo, 0

se agreguen a diferentes enerpos para que al darse la ac-

ción no sirvan de estorbo.

Dia 16.—Se celebró el día con salvas de artillería, músi

en, ele.—Se dice que el enemigo se está fortificando en San

Tais y que su fuerza total consiste de 7,500 hombres y 31

piezas de artillería—Todos deseamos que sulga a probar sus

armas con las miestras—Nada de nuevo —Segin noticias,

el Lic. Coronado con mil hombres y 14 piezas de artillería

Mesará a este cnartel general el 23 0 24 del corriente.

O Biblioteca Nacional de España

MEMORIAS DE LA GUENRA DR REFORMA 5

Dia 17.—El enemigo continña quieto en San Luis, y se

confirma La noticia de estarse fortificando.—Continía sus

atroces persecnciones de las familias cuyos deudos pertene:

cen al partido Liberal.—Vada se dice de movimientos milita.

ves, que La dilación que eu otros países causaría la ruina de

lux que permanecieran en inacción, las más veces da my

Menos resultados en este país de anomalías y contradiecio

nes —El Sr. Merduzco se ha resuelto a moverse con mus chi:

nacos sobre Guanajuato tan luego como Negue Coronado, y

se cree que no habrá ninguna función de armas pronto.—

Testo es lo que más conviene bajo todos aspectos.—Llegó el

“Sr. Aramberri, y fué recibido con las mayores pruebas de

eariño por los muchos amigos que tiene en las las del Tas-

tado.—Este cariño que tantos lo tienen a Aramberri, es ve-

neno para muchas nulidades en la fuerza que se creen gen-

te de razón.—i Calma *

Día 18-—Lat fueran continúa en esta hacienda y nada se

resielve sobre movimientos.—Mañana se mueve el Sr. Tier-

duzeo con todos los chinacos y yo lo acompaño porque así

conviene a los intereses: de la cansa y a los míos como par-

fientar—Se publicó una orden para que todos los que no

pertenezcan al ejército salgan fuera de la hacienda inchu-

sas las personas que a ella pertenecen, o que se ugregnen a

alguno de los cuerpos del ejército.—No es probable que Vi-

danrrí se mueva mientras los acontecimientos del interior

no le den la segridad de bacerlo sin temor de tener un en-

cuentro de armas.—Se acomodó conmigo el mozo Remigio.

DIA 19,—Resolvió el Sr. Rerduzco ponerse en marcha con

sms fuerzas de Guanajuato, y aun so había enisillado cuando

se díó contraorden porque no se acabó de arreglar el parque

que se leva para organizar tropas en aquel Estado.—Bravo,

se movió con su caballería a Cerro Prieto donde aguardará

las órdenes del señor Gobernador.—A Er. Antillón se le

dió su pasaporte, y a la infantería de Guanajuato se le han

puesto nuevos jefe—Llegó nn comisionado de México, y

.

O Biblioteca Nacional de España

E DIARIO DE CORONEL. VALDES

asegnra que el 15 del corriente se pronancian contra el la

mado gobierno del barajero Zuloaga. Si axí sucede, proba

blemente se falscará la revolución; si se descnidan en lo más

Jeve los hombres al frente del partido liberal nors cerrons.

Dia 20.—Como a las dos de la tarde se dió parte que el

enemigo en número de 3,000 hombres con artillería avanza

ba de San Luis, y ann se legó a decir que se estaban tivo-

teando von muestras avanzadas en el Puerto de Carretas—

En el momento se dió orden de marchar para reconcentrar

toda la fuevza en las posieiones que gmarda el ejército cerca

de Ahalulco, y se notaba el debido alboroto por parte de,

los muchos bisoños que nos acompañan. Otros con ealna y

sociezo mandaron tener su remuda lista para ensillar enan-

do el estallido del cañón nos anunciara que el “fandango”

había comenzado.—Entre estos iltimos se notaba al muy

gran Gobernador de Guanajuato D. Francisco Berduzco,

que simplemente mandó que se replegaran a esta hacienda

los ehinacos que con el Sr. Bravo estabun a unas enniro le-

guas de aquí para observar los caminos por Cerro Prieto.—

Como a las siete volvió el Sr. Vidaurri del campo acompa

fado de su plana mayor, y muchos repelando porque la no-

ticia había salido falsa. Lo único que hubo fué, que el pe-

ladito Miramón con unos dos mil caballos salió a distancia

de legna y media o dos leguas de San Laiis y se volvió ala

plaza sin haecr nado.—De Ticéaga con dos enerpos se ha

ido de San Luis a Guanajuato para baer recursos, y si se

hiciera un esfuerzo no sería difícil cortarle el vuelo con in-

terponerle mos 1,500 rilleros entre el Jaral y San Felipe—

Tista es la idea del Sr. Berduzeo, y practicable si el Sr. Vi

daurri con este fin desprendiera alguna fuerza.—Esta noch

sucedió una alteración desagradable entre Zuazua, y tn ex-

plorador de mucha confianza que acompaña al Sr. Berduzco

y al St. Espínola. El resultado fué que Espínola le dió una

estocada a Zuamna, y éste está bastante malo de la herida.

Tsta desgracia sucedió en la misma casa que el Sr. Berduzco

O Biblioteca Nacional de España

MEMORIAS DI LA GUERRA DE REFORMA E

ocupa, y este señor se inexmonió muchísimo por lo que su

codió,

Dra 21.—Nada se resuelve y el enemigo continña fortif-

cíndose en San Tnis.—En México se descubrió el plan de

destruir al llamado gobierno del harajero Zuloaga y en esto

vino a parar las gruesas sumas que el gobierno del Sr. Juá-

rez gastó para que se efectuara el tal pronunciamiento —La

fuerza total del peladito Miramón se compone de 5,300 hom-

bres, y de éstos, 900 con los de Ticéaga salieron para Gua-

najuato.—HMegaron algunos de Monterrey,

Dia 22—Continmamos en estado de inercia, y nada se re-

suelve, por estar aguardando que Tleguen Blanco, Coronado,

los de Tamaulipas, ele—Algunos fingen creer que el ene

migo quizá saldrá de San Luis a atacarnos—Bueno será

saber eu qué se fundarán para suponer tal cosa-—Salieron

para Zacatecas D. Francisco Rodríguez y D. Pablo Lascano

enviados del Sr, Terduzeo con el objeto de agenciar algunos

recnrsos.—Anoche se supo que D. Jesús Terán era nno de

os que trabajaban por la Constitución de 1857 y sin embargo

el comisionado que este señor envió cerea del Sr. Vidanrri

fué recibido y despedido con mucha frialdad por este señor.

—Sin embargo de In distancia que nos separa añn de la

Babilonia Mexicana, los pasteleros abundan, y justamente

se puede temer que en cnalesquier desenido se falsea la pre-

sente revolución que no deja bastantes esperanzas.

Día 23.—Los Sres, Muerta y Blanco, escribieron de More-

lía con fecha 14 del que rige, y dicen que pronto se pondrán

en marcha sobre el Bajío con dos mil hombres.—El Sr. Ber-

duzco envió orden al Coronel Vega para que este señor tome

posesión de San Miguel de Allende sin desatender al distri-

to de Sierra Gorda y San José de Iturbide. — El peladito

Miramón decomisó el cargamento de Ala, en San Luis, por

Uiaber traído sus efectos de Monterrey el dicho Alho—Tales

son las garantías que el partido Mungnía-Zulongn ofrece

O Biblioteca Nacional de España

0 DIARIO DEL CORONEL, VALDES

a la sociedad.—Algún día se les llamará a cuentas, y se les

hará sentir las consecuencias de sus crímenes.

Dix 24—El ejército continña quieto en sus posiciones,

y así continmará probablemente si no se mueve mientras el

enemigo en San Luis, no venga a atacarlo. — Abundan los

“borregos” y entre otros tenemos el de que el peladito Mi-

ramón con su chusma saldrá mañana o pasado a darnos la

acción. Quisiera yo creerlo, pero no puedo, porque ni lo

considero militar ni hombre de valor como lo suponen tan-

tos necios y erédulos. Precisamente, lo que tanto nos ha

favorecido es la cirennstancia de no ser ni valiente ni hom

bre de conocimientos verdaderamente militares—Esta no

che dieron un baile los oficiales y todos gozaron de los pla-

cervs del momento con tanto entusiasmo que nadie hubiera

creído que andaban los galanes en campaña. Las muchas

blusas y pistolas eu el cinto de los concurrentes indicaban

que no estábamos en tiempos normales—Para un elegante

de París o Londres, el dicho baile hubiera sido un espeetácu-

lo—Algunos han cometido el feo delito de deserción at fren-

te del enemigo, y en la orden general de hoy se manda, que

sin demora se les aplique la pena a los que lNeguen a ser

aprehendidos.

Día 25—Como a las 11 de hoy, se dió el aviso de que el

enemigo avanzaba con toda su fuerza, y que muchas avanza-

dns en el Pnerto de Carretas se replegaban a su vista.—De-

bemos alegrarnos de Ja salida del enemigo, y el resultado

será que se le castigará como conviene a los grandes inte-

reses de la Nación—A las 12 xe movió el Sr. Vidamri, de

la Parada, a Aluainico, y a poco rato se ayó el cañonco por

el Puerto de Carretis—El enemigo uvanzó con bastante

Wío sobre muelas posiciones avanzadas, pero el fuego cer-

tero de parte de nuestra artillería lo detuvo, y logró des-

componerto. El cañoneo continuó toda la tarde sin ninguna

novedad espocial.—Al meterse el sol cesó el fuego, y a las

10 y media o las 11 el enemigo hacía fuego con parte de su

O Biblioteca Nacional de España

o MEMORTAS DE LA GUNNA DE REFORNA "

artillería, para repeler al ataque de wax enerrillas mues

tras que los hostilizaron. En la tarde vimos dos quemados,

y uno que e hirió solo. Este herido probablemente morirá, y

cou éste van 7 a 8 que en la campaña han muerto por sus

descuidos. Tanto Jos mestros como el enemizo duermen 50-

bre sus posiciones, y veremos mañana si el peladito hace o

no mn esfuerzo para forzar alguna de muestras posiciones.

Lo que ahora nos conviene es ganar tiempo para que pue-

dan llegar las fuerzas de Cormado y de Lagos, al mismo

tiempo que Huerta y Junco por el Bajío se aproximan a

Guanajuato. Nuestra derrota es lo nico que salvará al ene-

mio, y que logre el hatirnos no es ni probable. Toda mues-

tra fuera se muestra Tena de confinuza y entusiasmo, y a

Wien seguro, que legado el momento crítico, se sostendrá

eloriosamente la cansa de los pneblos, la cansa de la Imma

nidad y la de los derechos del hombre que batiéndose por la

Tibertad, camine en pos de sit dicha y bienestar —Se corrió

hoy la voz de que el llamado Gobierno de Zuloaga, había

fusilado a Parrodi, Aguirre, D. José Marín y x Doblado,

como implicados en la conspiración que se desenbrió en Mé-

xico el otro día. No es ercíble esta noticia, aunque en Méxi-

co suceden cosas mucho más increíbles —Los carros para

mayor seguridad, se movieron al Puerto de Alualileo, y la,

entrada al puerto por el camino de Zacatecas la cubre una

fuerte avanzada de mis hermanos de Conhuila.

Día 26.—Moy ex domino, día designado por el Eterno

para el descanso de xi eriatura.—Es, en efecto, día de des-

canso para los que respetan sus leves divinas, pero no para

aquellos de sus impíos ministros que han motivado la pre

sente hueba que con sí tesoro e influjo sostienen con criminal

constancia.—El día amaneció apacible y sereno, para que

su reposo se pertarbara por el estallido del cañón, enyos

fuegos duraron todo el día con el objeto de evitar que el

enemigo se colocara en los puntos que deseaba ocupar—

Nuestra fuerza continúa a la defensiva, mimque ansiosa de

O Biblioteca Nacional de España

Lo DIARIO VEL CORONEL VALDES

que el enemigo haga nn esfuerzo para desalojarnos de algu-

vo de Jos prntos que venpamos—En la tarde se corrió la

voz en el Puerto de Alhualuleo, que el enemigo en número

de 2,000 hombres avanzaba por muestra retagnardia, y la no-

ticia no dejó de causar su alboroto entre las pobres mujeres

y algunos asustadizos.—El Sr. Berduzco montó a eaballo y

acompañó al Sr. Madero y a varios otros que pasamos a

reconocer los puntos por donde el enemigo podría avanzar.

—Pronto nos desengañamos y supimos que la noticia era

falsa.—Hoy se supa aquí que el St. Degollado había entrado

a Guadalajara, después de derrotar completamente al ase-

sino de D. Rufino Rodríemez Casanova. La noticia se cele-

dró con dispararle al enemigo 21 granadas —Ta única cs

peranza de los traidores de Taeubaya, se cifra en la chusma

que con el peladito Miramón, tenemos a nuestro frente, y

m0 es probable que éste salga muy airoso de la empresa que

hoy lo ocupa. ¡Quiera Dios, que al último sean castigados

estos eriminales con toda la seguridad que ns crímenes me

recen!—El resultado de los fuegos de mestras guerrillas

anoche, fué la dispersión de más de 300 del enemigo, y los

indios de Mesquitie, les han anitado hoy mos 250 0 300 fu-

siles.—Una partida de la caballería enemiga se encontró

con parte de los chinacos y algunos de nuestros rifleros, y

el resultado fué, que los cruceros xe pusieron en fuga des-

pués de haber tenido nun pérdida de tres nertos, además

de ulgunos caballos y lanzas con otros despojos de guerra

«me se Tes quitó. Tel fuego de artillería continuó todo el día

y el enemigo continúa sin hacer ninguna sería demostra-

ción contra nuestras posiciones—FI campo enemigo está

sifuado en Carretas, y sus fueras se movían de sm campo a.

los puntos que oenpan a nuestro frente. El peladito Mira:

món, no despliega el brío y arrojo que tanto patarnto le ha

atribuido antes de ahora.—Las fuerzas de Tamaulipas tam-

bién avanzan, y con Ja presencia de esta fuerza se acaba de

entusiasmar nuestro glorioso ejército,

O Biblioteca Nacional de España

aEMORTAS DE LA QUE DE REVORMA Le

Día 27.—En da tarde de ayer, volvió el enemigo con cosa

de 1,000 hombres «e Jas tres armas, y rechazó a los ehinacos

y pocos rifleros que en la mañana habían hecho correr ut un

grueso de eaballería.—El enemigo, al posesionarse del ran

cho de Bocas hizo atrocidades, matando hombres desarma

dos, mujeres y criaturas —Los indios de Mesquitic han he-

cho algunos prisioneros de los que se les han dispersado al

enemigo. Las fuerzas enemigas han hecho movimiento con

el grneso de xs fuerzas, a muestra izquierda oenpando el

rancho de Boeax y algunas alturas dominantes—Con este

motivo amenazan la izquierda de muestra línea, y si mañana

hacen por fanquearnos no dejarán los rifleros de marearles

el alto.—Nuestra fuerza está colocada de modo que les pue

da salir al encuentro por cualquier punto que ellos intenten

el ataque.—En la fuerza nuestra, todos desean que se forma

Jice la acción, y ninguno teme los resultados —Ahora se dí

ce une da fuerza de filancarte en número de 1,500 hombres,

«me salió de Guadalujara con el fin de atacar al Sr. Dego-

Mado, se prominció, y se agregó a este señor, que Blancarte

se volvió a la eiudad con uva pequeña fuerza y que las fuer-

zas federales halrían entrado a Guadalajara el día 24 del

corriento.—La noche está tenebrosa y lluviosa, sin embargo

de esto, mestros sufridos y valientes ciudadanos”armados

expuestos a la intemperie, reposan sobre sus armas pensan-

do en Ja importancia de la cuestión que se deñiende.—Prime-

ro morir que ser veneidos por los genízaros de tanto traidor

de México. ¡Ay de México si en la lucha somos vencidos!

Pero no, la cansa santa que defendemos triunfará y los

enemigos de nuestras Tibertades morderán el polvo ; fe y espe-

ranza! si logramos destruir este triunvirato de frailes, solda-

dos y agiotistas alzún hien positivo remltará al país si

aprovechamos el triunfo y no andamos con paños enlientes,

Día 28-—Como a las 10 de la mañana se observó que el

enemigo avanzaba amenazando a mnestra izquierda que es

el punto más fuerte de nuestra línea.—Se le dejó avanzar, y

O Biblioteca Nacional de España

E viano DEL CONONEL VALDES

cuando ya estaba a buen tiro de cañón, se rompieron los

fuegos con bastante actividad por ambas partes.—De las 3

a las 5, el fuego fué may amtrido, y en la tarde la enba-

Mería enemiga Imyó dos veces sin embargo de que nuestra

artillería era la única que obraba, pues aunque hnbo abu

mos tivos de riftes, la infantería y rifleros se conservaron fir-

mex en vts línens sin tomar parte en la acción que hasta la

entrada de la noehe se sostuvo por la artillería—Mañana

el enemigo hará un esfuerzo probablemente, por estar va

tan reren de nosotros; pues una retirada sería lo miemo

que ina derrota.—Nudie entre los nmestros teme el resulta

do final, y si como es muy probable, la fuerza que está a

muestro frente, sufre un revés, en tal caso, en las circuns-

tameñas y alla vista de Ahualuley habrá recibido su ¿nipe de

muerte el gobierno de los píearos qme tiene su origen en

la traición de Taenbaya.—Se hicieron algunos prisioneros

y muertos al enemigo; y nosotros en todo el día tuvimos un

muerto y tres heridos—Todo el día acompañó al patriota

Gobernador de Guanajuato, D. Francisco Berduzco, y con

entma observamos lo que pasaba por toda la línea, como

fambién el entusiusmo de mestra gente.— En la niche

acompañó al St. Herduzco a la Parado, pora descansar des

pués de fanta maltratado, y pasar he noche sin mejarnos.—

EN tiempo continúa Muvioso —El enemigo ocupa el Cerro a

la izquierda que domina a muestro centro y siendo esto así,

<mponzo que nuestra línea de batalla «e emmbiará esta noche,

Día 29.—Derrota del Tjérvito del Norte—Sin embargo de

que el enemigo oenpaha con dos piezas de montaña la po-

sición que dominaba a mestro centro, ni se hizo un esfera

para reenperar el punto ni se cambió la posición de mestrax

fuerzas. Los fuegos de artillería xe rompieron entre Jas 5 y

6. de la mañana, y cuando el Sr. Gobernador Berduzco y yo,

Mezamos al campo de batalla con asombro notamos que el

enemigo contimaba en la posición dominante que hahía aen-

pado la noche anterior, y que la posición de nuestra línea

O Biblioteca Nacional de España

MEnoRIAS OB LA QUERIA DD REVORMA 95

no había sido cambiada. Como a las 12 el enemigo con más

de dos mil hombres de infantería y caballería cargó nuestro

centro que no había sido reforzado y sobre el cual al tiempo

de la carga operaban las dos piezas enemigas, que estaban

en el Cerro a la izquierda y las piezas de grueso calibre al

frente—lis de notarse que al romperse los fuegos en la ma

Tiana se descubrió que un bombero de a 24 y tres piezas de

gruexo calibre habían sido elevadas en la noche por el Te-

niente Tanro.—Estas piezas estaban colocadas en un cañón

que quedaba entre la Jona que era muestro centro y el ce-

rro que desde In víspera el enemigo había ocupado con sus

dos piezas de montaña. Por esté punto cargó parte de la fuer

za enemiga cuando sobre la loma del centro se decidió la uc

ción-—Tauro, se diseulpó con decir que viéndose abandona-

do en la noche había clavado las piezas para que no les sir-

vieran al enemigo—Dos veces rechazaron los mestros a

los que los asaltaron, y cuando por segunda vez se retira-

ban, los nuestros que ocupaban la altura de la Loma grita-

ron ¡que les faltaba parque! El enemigo oyó el grito, para

ellos tan consolador, y rehaciéndose volvió a cargar ponien-

de en fuga a los nuestros que con increílle valor se habían

batido sin haber sido apoyados por ninguna parte del grueso

de nuestro ejército, que propiamente no llegó a entrar en

acción. Al lado de los valientes que con su sangre regaban

el terreno que ocupaban, se batieron ochenta o noventa in-

fantes de Guanajuato, enya pérdida fué proporcionalmente,

— En los momentos que el enemigo tomaba posesión de

nuestro centro el grueso de la caballería enemiga daba la

carga sobre nuestra derecha cuya artillería la dispersó y

puso en fuga. Entonces fué cuando tanta falta hicieron los

chinacos que en número de más de 250 lanceros estabau

en la Parada, a 2 y media leguas del campo de artillería! En

la Parada, de nada servían ni podían servir estos hombres,

y si Imbieran estado colocados en el finnco de nuestra dere-

cha como quería el Sr. Berduzco, la izquierda del enemigo

O Biblioteca Nacional de España

La manto DES CoNoNEL VALDES

Mubiera sido derrotada en los momentos que amestro centro

era batido. Lo que evitó que nox aproveeliáramos del valor

y arojo tan proverbial de los ehimicos, fé el mezquino es:

píritu del provincialismo que se había desarrollado entro

nosotros, y que tantos jefes fomentuban, El Se. Vidanrri,

el Sr. Zuazna y muchos otros de menos entezoría, exusaron

na prevención que funto nos perjudicó.—Por*esto fué, que

muchos de nuestros hermanos, cuyo liberalismo era muy

marcado, «in emburzo del ulpe rerrible que «e le daba a la

cansa, xe alegraron de la pérdida, porque habían notado el

eguísmo impradente y antipolítico que prevalecía en los con-

sejos del St. Vidaurri, y en los ánimos de casí todos los

que le rodeaban. El que más hizo para sembrar esta fatal

predisposición, Mé el hijo atolondrado de D. Santinzo, In-

dutecio Vidamrri, a quien sn padre había nombrado Coronel

del 4 Regimiento, a envax filas pertenecían tantos de los

muy nobles y valientes hijos de la frontera de Coahnila. Ta

política y los intereses de la enmia, sugerí que no se hubic-

ra hecho tan semejante nombramiento que muchos conside:

rabav como insulto hecho al sentido común de los hombres.

—Dirán o escribirán muehas cosas los que poco 0 nada vie-

ron de lo que pasaba los días 27, 28 y 20, y los que no sm

bían el estado que ¿mardaban mmestras fuerzas, pero lo cierto

es que desde que amanecía el 29, todo era desorden y con-

fusión, y que de nuestra fuerza total no se batió la quinta

parte de ella.—Los responsables de ln derrota son el St. Vi-

dameri, y mu segundo en jefe en la acción, D. Eduardo M.

Cordan, a cuya supuesta pericia el Sr. Vidanrrt 16 la exis

tencia de todo el ejército.— Llegaron los momentos eríticos,

y 50 vió que ni el General en Jefe ni sn segundo eran para

el caso.—Los primeros que cansaron el desorden fueron 6s:

tos dos señores y abandonaron precipitadamente el campo

sin hacer el más leve esfuerzo por contener u organizar a

los que se retiraban, sin embargo de las ventajas que pres-

taba el terreno parn ello. — Armuberri, Zunzna y muchos

O Biblioteca Nacional de España

MEMORIAS DB La GUBIMA DE REVONMA s_

otros, hicieron personalmente prodigios de valor, pero no fue-

von apoyados sin embargo de los empeños valerosos de Hi-

nojosa que fancionaba de Mayor General. A la cabeza de

los que abundonaban el campo, iba el St. Vidaurri, con los

que componían su Plana Mayor, mientras otros de sus ayu-

dantes con D. Juan Iustamante, que era el Mayor de la

primera División, acompañaban al segindo en Jote, Jordán,

que se retiraba por la Parada, en los momentos que Vidanrri

hacía lo mismo por el Cañón de Abnaluieo, y emusiba la

pérdida del inmenso tren de carros con darles órdenes para

que los prendieran, y siquiera salvaran la mulada—a esto

ex debido que no se salvara el tren en sn mayor parte, y así

lo están diciendo algunos de los interesados, que sabor

muy bien que el enemigo herido mortalmente no se ha movi-

do del campo de batalla —La presencia de Vidaurri, a la

cabeza del ejército del Norte, Mé la cansa de sm ruina, y

así lo emfesarán con el tiempo todos los que saben lo que

se hizo día por día después de haber legado a San Luis

el General en Jefe. ¡Polve de Vidaneri! yo, personalmente

nada ganaba con sn elevación anque tanto hice para soste-

merlo y elevarlo, y la buena repaación que en la República

vecina Negó a alcanzar se la debía exclusivamente a mis

escritos como corresponsal de algunos de los primeros pe-

riódicos de los Estados Unidos. Sin embargo, me compadez-

co del hombre, y más enando considero el terrible desenga-

ño que ha levado, convencióndose de la completa mulidad de

tanto mentecato, que impolíticamente elevó a puestos que

nunca merccieron.—Ta cansa ha recibido moralmente un

golpe terrible, y todo enanto he venido observando hoy, me

convence de la milidad de los hombres cuando la fortuna les

abandona. —En vano el Sr. Berduzco y yo, hicimos por dar

alcance al Sr. Vidanrrt, y al último, a una hora muy virn-

zada de la noche, hemos legado a uno de los ranchos del

Espíritu Santo, acompañados de muchísimos de los disper-

sos.—El Sr. Vidanrri, con los que le acompañan van a mata

O Biblioteca Nacional de España

Lo DIARIO DEL CORONEL VALDES

caballo aunque todos sabemos que nadie nos sigue, y que mu

número inmenso de los nuestros aún vienen a nuestra reta-

guardia por diferentes caminos.—Sin embargo del profundo

pesar que me agobia y desgarra mí corazón por la pérdida

de hoy, me retiro a descansar llevo de confianza en que

nuestra causa al fn triunfará, y yo, a lo menos, iré en busca

de otras fuerzas constitucionales y contribuiré en lo que

pueda para justificar la santa causa de los pueblos que de-

fendemos.—Ie escrito sin pasión, lo que en unión del señor

Gobernador Berduzco presencié hoy, y me es doloroso creer,

fundándome en lo que he presenciado, que la pérdida del

Ejército del Norte se le debe en su mayor parte, a la im

pericia del segundo en Jefe, y al Sr. Vidaurri que dejó todo

a disposición del Sr. Jordán—Cuando consideramos quié

mes eran los ayudantes del General en Jefe ningún asombro

mos causará el desorden y confusión que dieron por resulta.

do la terrible pérdida que el muy noble y patriótico Estado

de Nuevo León y Coahuila ha sufrido en este día—Nada

positivo sabemos de lo que se ha perdido, y dicen que algu-

mas piezas se salvaron, y que las conducen Hinojosa y al-

gunos otros.

DíA 30.—Continuamos el Sr. Berduzco y yo, con el em-

peño de alcanzar al Sr. Vidaurri, con quien el Sr. Goher-

nador de Guanajuato deseaba tener na entrevista con el fu

de saber la resolución final del Sr. Vidaurri, y saber si

se haría o no por reorganizar la fuerza en alguna parte

antes de llegar a Monterrey.—Por orden de Vidamrri se

devolvió D. Antonio Santiago que con una Sección y aleu-

nas piezas habían legado a la hacienda del Espíritu San

to con el objeto de incorporarse al ejército del Norte—Esta

era la fuerza que en Tagos había derrotado a Patrón.—En

Salinas dimos aleance a los Coroneles Zuazna, Aramberri,

Zaragoza, Villanueva y a mnchos otros jefes, oficiales y

tropa que tan luego como comieron continuaron su mar-

cha siguiendo al Sr. Vidaurri, que iba adelante.—Como a

O Biblioteca Nacional de España

MENONAS DE LA QUENDA DE AEVORMA 9

las 12 de la noche Megamos a Ramos el Sr. Berduzco y yo,

y nos encontramos con que el St. Vidaurri había salido en-

tre las 8 y 9 de la noche aunque un enviado del Sr. Berduzco

lo aleanzó y le dijo que este señor lo venía siguiendo con el

objeto de tener una entrevista.—Habiendo errado el camino

segín creíamos, se mandó hacer una Timbre en medio del

enmino real, y se hizo alto mientras se averiguaba si Nevá-

bamos 0 no el camino para lamos. Como a las 10 de la noche

Megó a donde estábamos el Lic. Coronado, acompañado

de algunos de sa plana mayor, y después de haberle di

cho que el Sr. Vidaurri iba adelante, se adelantó a media

rienda para alcanzarlo. El Sr. Coronado con su Sección

avanzaba sobre San Luis cuando la fatal jornada de Ahua

lulco—Llegó a Ramos, pero no vió al Sr. Vidaurri, porque

va se había puesto en marcha este señor—Todo el día ha

corrido la voz de que Zayas se está batiendo con el enemigo

en Tocas, Aunque muchos lo creen no es posible—Ahora

sabemos que Pedro Minojosu ha sulvado $ de las mejores pie-

zas de nuestra artillería, y no faltaría quien le quiera arre-

datar el erédito de este hecho.

Ocrum 1%—En Ramos, y por cierto uno de los puntos

más miserables en toda la extensión de la palabra que pue-

de haber en la República —Tegó la Sección Coronado que

continuará en campaña contra los traidores de Tacubaya,

y a esta fuerza nos incorporaremos muchos de los que aún

tenemos esperanza y mueha fe en la causa de la Immanidad

que defendemos.—En estos momentos de miseria para tanto

disperso que se ha rennido aquí y están llegando, el señor

Coronado ha dado a Zuazua $10,000 para socorror a la

gente, y de esta cantidad se le envían $5,000 a D. Santiago.—

Zuazna continúa su marcha para Monterrey con toda la

fuerza que 6e está reuniendo. Segín instrucciones del señor

Vidanrri, el Sr. Zuazua le deja el mando en Jefe del ejér.

cito del Norte al Sr. Coronado—Le nombran Coronel en

Tefe: y se llevan toda la fuerza que se está juntando ade-

O Biblioteca Nacional de España

_ PIANO DEL CONONIL VALDRS

más de la artillería que eon Hinojosa Mezó hoy, menos las

dos piezas que pertenecen a Chibualma y que la Sección

Coronado recibirá.—Da pena notar lo que sufren moralmente

algunos de nuestros jefes y oficiales por la pérdida que hemos

snfrido, aunque los más se muestran indiforentes sin duda

porque no aleanzan a comprender los nmy bárbaros la mag-

uitnd de la pérdida que se ha sufrido —Dolor profundo nos

debiera cansar a dos que vimos la torpeza e impericia con

que se perdió en mu momento el renombre y muy elevada fa-

ma de Nuevo León y Coahuila, y más enando consideramos

que a esta imperieía se debe Tn muerte de algunos de los hom.

bres más nobles de nuestro Estado.—Entre otros que su.

emmbieron, tenemos a Viezea, de Purras, y a Valenzuela,

de San Imenaventura que eloriosamente cayeron defen

diendo el punto que se les había confiado. Murieron eomo

valientes, y de un bosque de Inureles sas almas volaron a la

eternidad.

Dix 2—Salió Zuazua, Aramberri y muehos otros jefes y

oficiales con toda la gente que se había reunido, aquí en Ra

mos, amune muchos se agregaron a la Sección Corrnado.—

Entre otros que nos quedamos, tenemos al Coronel Hinoja

sa que ha sido nombrado Mayor General de Ja brigada —El

Sr. Cormado me nombró ayudante de la persona (?) y Se

cretario del ramo de Guerra—Mañana se moverá toda la

fuerza para colocarla en algún punto menos miverable que

Este, donde se puedan conseguir hestias y pasturas para la co-

ballada—Continúan miles de cuentos respecto de la pérdida

del enemigo en muertos, heridos y dispersos. —Se está reor-

ennizando la brigada, y no consideramos que estamos perdi

dos. Tenemos razón para erecr que pronto haremos algu

digno de ta cansa que a todo trance se sostendrá —Se reci

bió noticia oficial de la completa derrota de Casanova por el

Sr. Degollado, y es probable que exte señor hava tomado po-

sesión de Guadalajara

Dia 3.—Salimos de Ramos y se hizo jornada a la Hacien-

O Biblioteca Nacional de España

MEMORIAS DIE LA GUIA DE REFORMA TE

da del Carro—se pusieron commnicaciones a los señores

Castro y D. Antonio Santiogo, excitando a éste para que

con su fuerza se nos incorporara en San Jncinto—Quiroga

que con unos 40 hombres se había incorporado a la brigada,

cometiendo un erimival abuso de confianza, se volvió del ca-

mino, después de haber sido socorrido y de la promesa que

había hecho de correr la suerte de esta fuerza. Desiurmó y

les quitó el dinero a algunos y su conducta fué la de mn

bandido.—Este Quiroga era el digno Teniente Coronel del

Coronel D. Tudalecio!?!—El enemigo hasta ayer continuaba

en su campo de Almalnleo y la Parada, y horror nos causa

oir lo que todos dicen que han hecho con Jas familias de los

liberales. —No se confirma lo que tanto habían dicho del

ataque de Zayas, y no creo que haya hahido verdad en todo

lo que sobre esto han dicho—Se pusieron comunienciones

a los Sres. Huerta y Degollado para que «ns fuerzas operen

de acuerdo con éstas, o cuando menos se pongan en comini-

cación con nosotros.

Día 4—Del Carro xe hizo jornada a San Jueinto. hacien

da perteneciente al español Bermejillo, que tanto contribu-

só a entablar la ruidosa cuestión entre México y España

por los Tamados asesinatos de síbiditos españoles de San

Vicente—Esta noche so le puso una comunicación al Go-

bernador de Aguascalientes, citindolo el Sr. Coronado, a

una entrevista en esta hacienda, mañana.

Día 5.—En San Jueinto: Megó el Sr, Tópez de Navi, Co-

hernador de Agunscntientes, y convino con el Sr. Coronado

en facilitar recursos para esta fuerza —Se le escribió al se-

ñor Gobernador Castro, de Zacatecas, eitándolo a una entre-

vista en el Refugio, mañana—Nada sabemos del enemigo,

mi se ha determinado enándo ponernos en movimiento.—-Con-

viene hacerlo enanto antes, y no estacionarnos en momentos

tan críticos como los que se presentan.

Dis 6.—En San Jacinto—Salicron para el Refngio los

Sres. Corovado y Herduzco para tener una entrevista con el

O Biblioteca Nacional de España

E DIANIO DL CORONEL VALDES .

Sr. Gobermidor Castro, y arreglar definitivamente las opera-

cjones militares de esta fuerza y la de Zacatecas-—Regresa-

ron ya muy noche, y no se vieron con el Sr. Castro.—Se con-

tinúa la reorganización de las fuerzas, y la eliboración de

parque para movernos completamente organizados—El se

ñor Castro reminció el Gobierno de Zacatecas, y lo mismo

ha hecho el Sr. Parra, que no jugando muy Timpio, teató de

entregar el Gobierno a los conservadores.—El Lie. Gonzá.

lez Ortega, como presidente de la diputación permanente,

se recibió del Gobierno del Estado. Cansa asombro Ja faei

lidad con que vuestros hombres públicos abandonan ann los

primeros puestos, tan Tuego enmo éstos dejun de ser un le-

cho de rosas.

Di Tu San Jacinto—Se recibió aviso oficial de la

renuncia del Sr. Castro, y de haberse recibido del Gobierno

de Zacatecas el Sr. González Ortega—Se le escribió al se-

ñor Castro para que haciendo un sacrificio se encargara de

nuevo del Gobierno por exigirlo asf el bien de la cansa que

defendemos.—Salieron para Zuentecas los Sres. Nerduzco,

Finojosa y Valdés, con el fin de hacer euanto se pueda para

que Zacatecas contribuya cuanto antes con gente y recursos

pecuniarios a la defensa de la causa en cnyo favor tanto se

puede hacer si no nos dormimos, y obramos con toda la ae-

tividad que Jas circunstancias exigen—En la tarde Negó

un comisionado de los Sres, Huerta y Blanco, con la noticia

de ln derrota completa que sufrió Tchegaray entre Amozoc

y Acajete. Los Sres. Alatriste y Trejo mandaban las fuer-

zas federales—Se celebró la noticia con salvas de artille

ría, repiques a vuelo, dianas, vivas y cohetes, y toda nuestra

fuerza celebró In noticia con frenético entusiasmo, y en el

momento se comunicó por extraordinarios violentos al Co

hierno de Zacatecas, y al mismo tiempo se les escribió a los

Sres. Berduzco, Hinojosa y Valdés, para que activaran las

cosas en Znentecas, y podernos mover sin pérdida de tivm-

O Biblioteca Nacional de España

MEMORIAS DE TA OUENIA DB REFORMA > T8

Do, y ponernos en comnnicación con las fuerzas de Blanco

que marcharán sobre México,

Día $—En San Jacinto—La fuerza toda continúa prepa-

rándose para la marcha, y continúa la reorganización de

los cuerpos. De tarde hacen el ejercicio, y después de la lista

de $ el Capellán les reza el rosario y les predica un corto

sermón que tiene por objeto explicarles sus deberes, y los

fines del hombre en sociedad, según Ja intención del Creador

del Universo. Si de esto se ocupara el elero en el país, pron-

to cesarían las sangrientas guerras civiles que amenazan la

completa ruina de la República —Se recibieron comunica.

ciones de los Sres. Nerduzco y Valdés, diciendo que todo se

había arreglado satisfactoriamente con el Gobernador de

Zacatecas.—Lo mismo eseribe el señor Gobernador y ofrece

que el Estado pondrá todos sus recursos a disposición del

ejército federal.—Me escribió Valdés diciéndome que había

aceptado el nombramiento de Secretario del Gobierno de

Zacatecas.—Tlegaron los Sres. Berduzco e Hinojosa, y el

Gobierno de Zacatecas nos remitirá cuanto antes cuantos

anxilios pueda en vestuario y municiones de guerra.—Maña.

240 pasado saldrán las fuerzas de Zacatecas y se remnirán

4 las muestras aunque ya su gobierno las había puesto a dis

posición de D. Santos Degollado —Este hecho incomodó de-

masiado al Sr. Coronado, y veremos cómo se allana esto de

una manera satisfactoria.

Dia 9.—En San Jacinto—Se dió el primer toque de mar-

cha, y ya Histos para salir xe dió contranrden.—Se pusieron

comunicaciones al Gobernador de Zacatecas para que sin

pérdida de tiempo remita 100,000 tiros de fusil y pólvora

suelta para balas de cañón. —Sulieron los Sres. erduzco y

Bravo; el primero para activar las operaciones del servicio

en Agnascalientes, y el segundo para el Bajío con el fin de

remitir los célebres chinacos e incorporarlos a esta brignda

para pisar el territorio de Guanajuato.—Se despachó ex

O Biblioteca Nacional de España

E DIARIO DEL CORONEL VALDES

traordinario al Sr. Blanco, poniendo en su conocimiento que

marchábamos al interior, y que enanto antes queríamos

que esta fuerza y la de él se pusieran en comanicnción.—Se

Te motiñen que, herídix de muerte las meras del peludito

Miramón, éste no podrá muy pronto tomar Ja ofensiva

Dis 10.—En San Jueinto; llegaron los exploradores con

la noticia de que el enemigo en número de $00 hombres de

caballería e infantería se movían tomando el rambo de la-

mos, en cuyo punto se habían avistado 300 dragones más—

Se dió aviso también que nu tal Corona, por el Naranjal pre

guntaba por esta fuerza, y sin duda serán los mismos que

van para Ramos—Se puso comunicación al Ciobierno de

Zacatecas para que las fuerzas de aquel Estado en el acto

se pongan en marcha, tomando el camino de Aguascalientes

por el Refugio, y nniéndose con las muestras, ver si se lo

puede dar vn golpe al enemigo—A los enantos minutos de

haber salido el extraordinario, legó ntro de Zacatecas dando

aviso que no se podía facilitar ningún parque porque mu el

que se había elaborado a la salida de aquella ciudad del se-

ñor Castro, lo habían inutilizado con echarlo enn pozo'—

El Sr. Coronado recibió cartas de Divango y Chilmalma,

y se contestarán según los punlos que para ello me dió—

Mañana nos movemos sobre Aguascalientes y sin demora nos

pondremos en comunicación con las fuerzas del St. Tilanco,

quizá estarán ya en el Bajío.

Dis 11.—Hieimos jornada de San Jacinto a Rineón de

Rowos.—Esta es una bonita población de 3 a 4 mil almas y

que se dedican casi exclusivamente a Ja agricultura.—El en-

rita de esta Villa celebró con un hanquete la derrota del

Ejército del Norte, pero se ausentó cuando supo que nos

aproximábamos—Se escribió a los señoros Perduzco y Ló-

pez de Nava, para que se zenartelaran las tropas que en

aquella ciudad se incorporarán a estas fuerzas. — Mañana

continuamos la marcha a Aguascalientes —Se dice que Tean-

co está on el Torreón.

O Biblioteca Nacional de España

MEMORIAS DU LA GEBIMA DE NEFONNA E

Dix 12—Hicimos jornada a Aguascalientes, cuyo Gober-

nudor, el St. López de Nava, es hombre de buenas intencio-

mes, pero que le falta Ja encrgía y decisión tan necesaria en

cireunstancias como las presentes. Tu San Jacinto, prometió

fucilitarnos $20,000, y hemos Negado para saber que nada

se ha hecho y n0 perder el tiempo en contemplaciones que

minea dan resultados positivos. — Sm chaquetita redonda.

pantalón rabón que abrocha en el pecho, su sombrero de

ranchero decente y sus zapatitos de Custor con Jas puntas

cuadradas, indican su hombría de bien, pero 10 la agudez ne-

cesaria para Nevárselas tiesas a los de esta ciudad semidev

tica—En la distribución que se hizo de los $20,000, se 1e

asignaron 52,000 ul enra de esta cindud, y habiéndolo en-

viado a Namar el Sr. Coronado, primero envió a decir, que

si eva ana síplica que vendría mañana, y que sl era un man-

dato que no lo obedecería—Volvió el ayudante a verlo, y

contestó que se enviara la orden por escrito, y el Sr, Coro-

nado entonces le previno al ayudante que lo trajera “de Ia

Tenga si se resistín.”—Trajeron al señor cnra, que es hom

bre de unos 50 años de edad, robusto, de huen personal, y

cuyo lenguaje y temple de voz revelaban sn disimulado or-

ento y soberbia. —Cuanto dijo indicaba que sc le había iu-

sultado según él creía, groseramente, y en contestación. el

Sr. Coronado que ya estaba en buen punto, lo puso en ma:

mos de un oficial para que en mo de los evarteles lo pusiera

rigurosamente inconmniendo.—Al salir el cura de su casa le

advirtió a uno de los ayudantes que el Sr. Coronado no esta

da en pueblo amigo, y xe le dió la respuesta consolatoria

de que si decía tna palabra con el objeto de alarmar al pue

blo, el primero que moriria sería él Esto lo aplacó lo «mii-

ciente para dejarxe conducir sin escándalo a la presencia

del Sr. Coromado—Esto señor cura, D, Antonio Vélez, está

impuesto a roneartos recio a cuantos no han querido tratar.

19 como hombre privilegiado, pero en el presente cuso se

chasencó este partidurio de los traidores.—Le Tegó a lo vivo

O Biblioteca Nacional de España

so DIARIO DEL CORONEL, VALDES —

el Si. Coronado, enando le dijo que sí hubiéramos comenzado

con colgar a unos quinientos frailes de la clase de El, la re-

volución hubiera ya terminado. El hecho de haberle aplica-

do a voz “fraile” le pudo mucho, y se dió por insultado en

alto grado este disetpnlo de Torquemada y Jiménez—Se le

escribió al Gobierno de Zacatecas para que a las órdenes del

Sr. Alatorre se muevan aquellas fuerzas a incorporarse con

éstas, y Mevar evanto antes al interior las operaciones mili-

tares.—Al entrar a la ciudad nos encontró el coche del Go-

bierno para conducir al Sr. Coronado, pero este señor quería

presenciar la entrada de la tropa, y me envió a mí con los

señores comisionados a quienes acompañó al Palacio del Go-

bierno.

Dis 13—En Aguascalientes, población muy hermesa y

que enenta unos 25,000 habitantes.—Se edebró en Palacio

ma Junta con el objeto de hacer la distribución de los

$20,000, que se enterarán mañana.—El señor cura Vélez,

después de dormir anoche en una bartolina, amaneció menos

altivo y arrogante, al grado de dar una satisfacción, y la

promesa de dar la parte que la Junta le osignaba.—Con fe-

ela 9 del corriente comunica el Sr. Degollado al Gobierno de

este Estado, que el enemigo saliendo de ns últimos atrin-

cheramientos lo reehazaron cuando asaltó nna de las Mnens

que forman el sitio, y el ejército federal prendió en el en-

cuentro al valiente general Núñez —El peladito Miramón

continúa fortificindose en San Luis y no ha emprendido

absoltamente ningún movimiento.—Se está haciendo ves-

tuario para la tropa, y pasado mañana estaremos listos pro-

bablemente para movernos.

Dia 14.—En Aguasentientes.—Se continúa la preparación

del vestuario y parque—Llegó un comisionado del Sr. Dego-

lado que ayer salió de Guadalajara, cuya caída es segura

según nos asegura si pronto 10 anxiliamos con esta fuerza—

Faremos mn gran esfuerzo para Negar enanto antes a la

ciudad citada cuya ocupación hería de muerte al gobierno de

O Biblioteca Nacional de España

MENORIAS DE LA OUERRA DE REFORMA 7

burlas que los traidores de Tacubaya tienen en México—

Se le puso extraordinario al Gobernador de Zaentecas para

que la infantería de aquella cindad sín pérdida de un solo

momento se ponga en marcha sobre Guadalajara, tomando el

camino más derecho.—Se le escribe al Gobernador que dejen

la artillería por no ser necesaria, y que con sólo aproximar-

mos a Guadalajara la ciudad sucumbirá—Para cnando el

peladito Miramón sepa de nuestro verdadero movimiento, ya

seri tarde para auxiliar a su paninguado Blancarte, y el

hecho es que lo dejaremos encampanado en San Luis—Esta

mañana llegó correo de Blanco que estaba en Maravatío, y

trataba de fundir la plata que el Sr. Fuerta les quitó a los

clérigos de Michoacín.—Son unas 413 arrobas de candeleros

y otros artículos de plate quitada a las iglesias—Esto es

entenderlo, y siquiera se pondrá en circulación pro bono pri

Blico—Las noticias fidedignas de San Tuis confirman la te-

rrible pérdida que los cruceros tuvieron en Ahualulco, y lo

muy célebre que en los momentos que Vidaurri corría por

el Cañón de Almalulco, el peladito hacía lo mismo por el

paso de Carretas—Les primeras noticias que recibieron cn

San Luis, fueron de que los renecionarios habían sido de

rrotados. Al perder Vidamri su elevada reputación, no con

servó ni aun la dignidad de un portero de garita

“Día 15.—En Aguoscalientes—Por no haberse concluido

el vestuario para la tropa, y porque no se acaban de recan-

dar los doce mil pesos que los de esta ciudad facilitan a

nuestra fuerza, no salimos esta noche—Se les escribió a los

Sres. Huerta y Blanco—Sin embargo a tanto evento tocan-

te alo de la salida de San Luis, lo cierto es, que no se han

podido mover de San Tuis y que no es muy probable que

Miramón el peladito pueda socorrer a los de Guadalajara

antes que nosotros llesemos.—Se publicó una proclama del

Sr. Coronado a la brigada con el objeto de entusiasmar a los

“soldados.

Dia 16.—En Aguascalientes —Estando ya listos para sa-

O Biblioteca Nacional de España

" DIARIO DEL CORONEL VALDES _

lin, se dió eoutraorden porque no xo acabó de socorrer a la

tropa, ni tampoco se acahó de repartir el vestuario —Se ve-

cibieron comunicaciones del Gobierno de Zueatecas, y repite

que sin pérdida de tiempo se moverán sobre Zaentecas. Ase-

gura el Gobernador que en México Jos Toschilds han dado

setecientos mil pesos por libranzas del elevo, y que de esta

suma se limiten $100,000 al peladito Miramón, que pronto

se moverá.—Corre la noticia de que 1,500 hombres del ene-

migo están en Ciénega: esta noticia la acaban de traer unos

mozos.—Estamos perdiendo momentos preciosísimos, y es

de todo punto indispensable que avancemos.—Se despachó

correo a los Sres. Huerta y Blanco.

Dia 17—Salimos de Aguasealientes e hicimos jornada a

la Taborcita—La notieia de que el enemigo estaba en Cié

negn salió fulba.—En la tarde recibió el Sr. Berduzco un

coreo de Garibe, con la noticia de que Muerta había de

iwotado a de Tieéaga en Salvatierra, dispersindole toda su

chusma —En la noche legó un comisionado del Sr. Degolla-

do instando al Sr. Coronado a que apresnrase st mirela.—

El día estuvo pésimo, y la tropa se cansó mucho al rendir

la jornada. Nos cuentan unos que en San Juan de Tags

hoy unos 200 del enemigo, y otros nos aseguran que la plaza

está sola.—Mañana lo sabremos.—Segín cuanto vi y llezué

a saber, la eindad de Aguascalientes sin embargo de ser

cindad considerulle, carece casi absolutamente de lo que

Mamamos hombres de espíritu público, esto nos da una iden

muy desconsoladora, y nada tiene de extraño que cualquier

aventurero con un puño de genízaros se burle de la sociedad

con toda impunidad.

Dra 18.—Hicimos jornada a San Juan de los Lagos, po-

Maeión al parecer de nnos diez mil habitantes, y célebre por

su célebre santuario de San Juan de los Tagos, y por la gran

feria que amialmente se celebra —Tas donaciones de los fie-.

les al templo en la temporada de la feria son fabulosas, pero

lo ejerto es, que esta es una de las poblaciones más fanáticas

O Biblioteca Nacional de España

MEMORIAS DR LA GUELRA DE REVORMA »

en la Repállica, y es de suponerse, que en proporción al fa-

mathemo fenemos el crimen y la inmoralidad, como sucede

en da capital misma del Namado Santo Padre de Roma.—

El templo, es una bonita fábrica, y algunas de as case tam

bién uo carecen de bastante buen gusto en su construcción.

—la mayor parte de los ricachos principales se ausentaron

al aproximarnos nosotros, y lo mismo hicieron las autori-

dados, y multitnd de la población a juzgar por el número

de casas que observamos cerradas —Antes de medio día, a

lo lejos se les dió vista a algunos exploradores y se les tiró

un eañonazo eo una de las Piezas de a 12.

Dia 19.—Salimos de San Juan de los Lagos, y se hizo jor-

muda a Jalos, población de mos + 0 5,000 habitantes, y que

como San Juan queda en nu pozo, estando todo rodeado de

lomas bastante elevadas.—Se despachó al Sr. Centeno con

pliegos al St. Degollado suplicando a este señor que no com-

pronmetiera ninguna acción antes de Uegur esta brigada, y

que se haría todo empeño por legar cuanto antes. Ta oeu-

pación de Ja eapital de Jaliseo es sumamente importante,

y es probable que con Ja toma de aquella plaza, se decidirá

la enestión contra los traidores de Tacnbaya.—En la tarde

fueron azotados unos dos infelices por robos que cometieron

en el camino—Sin embargo de los grandes esfuerzos que

se hacen para evitar que las viños acompañen a la tropa,

es absolntamente imposible almventarias.

Dra 20.—Entre la 1 y 2 de Ja mañana, salimos de Jalos,

y al amanecer, pasábamos el Puente de la Taja.—A las 12

del día llegamos a la venta, y descansó la tropa hasta las

3 de la tarde, y se continúa la marcha. En este punto, la

casa de diligencias está muy bien asistida, y el aseo y como-

didad que a golpe de vista se observa, me hizo hacer recuer-

do de los hoteles en Tos estados Unidos. —Con la noche Me-

gamos a la Puerta de la Mota 3 y media leguas antes de

Negar a Tepatitlán.

Dia 21.— Salimos de la Puerta de las Motas, y a las 9 y

O Biblioteca Nacional de España

Lal DIARIO VEL CONONEL VALDES _

media pasamos por Ja muy bonita Villa de Tepatitlán.—En

este punto fué aprehendido un correo con pliegos del pela-

dito Miramón, dirigidos al asesino Casavova y al sombrerero

Blancarte, en Guadalajara, diciéndoles que dentro de 3 días,

es decir, el día 20, saldría de San Luis con 600 caballos y 4

piezas el General Chacón para auxiliarlos contra el faecioso

Degollado y su “chusma ”—So me hace que este amxilio se

parecerá al que le aseguró al finado Manero, que le enviaría

a Zacatecas, y el infeliz, habiéndose atenido a ella le costó

la vida. En cualquier descuido corren igual suerte los dos

pícaros que están al frente de la plaza de Guadalajara, pues

mo es ni probable que puedan ser socorridos—Pernoctamos

en el muy célebre Puente de Calderón, célebre en nuestra

historia por la derrota que aquí sufrió el Cura Hidalgo en

la acción que sostuvo contra el lobo carnicero de Calleja—

La tropa llegó muy cansada, y todo estaba escasísimo, vive-

res y pasturas, ete, ele.

Día 22—Como a las 12 pasamos por el pueblo o Villa de

Zapotlanejo, enyos habitantes, siendo ardientes partidarios

de la Constitución, nos recibieron muy bien, y en todo se

notaba el gusto con que nos recibían. —Muy temprano Llega,

mos al famoso Puente de Tololotlán, 7 leguas de Guadala-

jara—En la tarde se pasó revista de armas, y la fuerza llena

de entusiasmo y fe avanza al socorro de sus hermanos que

bostilizan a los traidores que ocupan la plaza—Según todos

los informes, al legar nuestra fuerza es probable que la pla

za sneumbirá.—Se despacharon los originales de la corres-

pondencia del peladito Miramón, al Sr. Degollado.

Dia 23.—Salimos del Puente, y como a las 2 de la tarde

Negamos a Guadalajara. Al establecer nuestro cuartel en

el célebre Hospicio de esta ciudad, los de la plaza tocaron

repiques a vuelo, doblaron después y nos tocaron agonías.—

Aver circuló el enemigo una proclama en la que aseguraba

que nuestra fuerza se había pronunciado en San Juan de los

Lagos ¡por el Plan de Tacubaya!—Blancarte en sus conver-

O Biblioteca Nacional de España

aMonTAS DE LA GURIERA We MEFONA "

saciones confidenciales aseguraba que para el proymicia

miento le había dado a Coronado $70,000.—La plaza la de-

fienden unos 1,000 hombres y 8 piezns.—En la tarde, el se-

for Berduzco me presentó con muestras del mayor cariño, al

putriota General en Jefe del ejército federal Don Santos

Degollado, que es un hombre sumamente amable y simpáti-

co—Es sin duda uno de los primeros hombres del país—

Anoche legó correo de México, y Blanco, Alatriste y otros

jefes constitucionalistas estaban ya en Chapultepec. —Ta

corrompida Vabilouia caerá al saber que esta ciudad está

en mmestras manos—Mañana se hará un esfuerzo para to-

marla y el mando de Jas fuerzas que operan sobre una de las

líneus se le dará al Sr. Orozco y a mí. La otra línen la man-

darán los Coroneles Ftinojosa y Villanmevo.—Esta tarde me

escapé de que los de la plaza me mataran de un cañonazo:

la hala dió arriba de mi cabeza, y me tapó de adobes —Lo qne

me salvó fué que D. Pascual Jaramillo me gritó a tiempo

«ue mo quitara de aquél punto tan expuesto.—Nuestra fuer.

70 desea el combate, y ruego a Dios que me proteja en las

operaciones que en parte dirigiré mañana.

DIA 24.—Las operaciones ofensivas continúan, y parte de

Jas fuerzas nuestras se hallan a tiro de pistola de los forti-

nes de los enemigos. El enemigo resiste con bastante espíri-

tn porque rec ser socorrido de mn momento a otro, por el

peladito Miramón. En esto Nevarán chasco, y en cunlquier

descuido les sucede lo que a Manero y compañeros en Zaca-

tecas. Sin embargo, la situación geográfica de esta cindad

facilita a los cabecillas el modo de ponerse a salvo con la fu-

n.—Como a las 10 de la mañana el Coronel Oronco y vu,

con unos 150 hombres: nos posesionamos de San Juan de

Dios, y sirvió de señal al enemigó para que nos rompieran

fuego vivísimo que cansó la muerte de dos de unestrs sol

dados.—Basta ahora, nada me ha sucedido, anuque lo más

del día tuve que exponerme mucho paro darle ejemplo a la

tropa.—En la tarde hirieron de muerte a D. ais Arrene

O Biblioteca Nacional de España

“e DIARIO DEL CONUXEL VALUES

chea que mandaba la infantería de Aguascalientes, y al Te-

vente Rodríguez del batallón de San Juis—foda nuestra

fuerza con muy pocas excepciones se ha portado muy bien.

—Esta noche se acabarán los montajes de uvas piezas tige-

ras, y probablemente mañana se decidirá la cuestión —Me

retiro a descansar un rato, pues son las 123 de la noche, y ya

10 aumanto de los pies.

Dis 25. Desde que rompió el día los fuegos se abrieron

con actividad por ambas partes, y el enemigo que ocupa los

puntos más dominantes de la ciudad hizo un fuego vivísimo

sobre el Puente que para tomar posiciones tenhrmos que

atravesar. En exta operación salieron heridos varios de los

muestros, entre ellos el Teniente Coronel lnstamante del

batallón de San Luis, euya eondueta indicaba temor—Como

a las doce del día parte de la enadra eerea del templo de San

Felipe fué volada por los ingenieros del Sr. Degollado, y cl

volumen de humo y polvo que se notó fé asomiroso.—Nues-

tra línea está esta noche a menos de tiro de pistola del enemí

20, y mañana probablemente se decidirá la cuestión.—A mí me

tocó hostilizar a las haterías enemigas desde los altos del Me-

sín de San Joaquín, y el enemigo mo contestó el fuego con

mueho valor y dennedo—Una hala me való el sombrero y

me lo ngnjeró de Ja falda arriba de Ja oreja izquierda. Todos

se quedaron asombrados al ver que no había salido herido,

amuue envían que me habían matado—Nuestra fuerza nu

desmaya, y continúa entusimsmada—Nos comienza a fultar

parque, y es menester que se resuelva pronto ln cosa.

Div 26.—Los fuegos tado el día de hoy fueron muy pañsa-

dos y se continuó Ja operación de taladrar las casas para

aprosimarnos a Jos fortines enemiros, y si como es de ercer

se, logramos quitartes un solo fortín, es probable que la pla-

za se rendirá.—Hoy tnvimos algunos heridos, y yo continúo

oenpando con la reserva los altos del Mesón de San Joaquín,

de enyo punto he logrado hostilizar al enemigo, de nnn

mavera efectiva,

O Biblioteca Nacional de España

MEMORIAS DE LA GORILA DE REFORMA CA

Días 27 y 28—Gon la derrota del Ejército del Norte en

Ahnalulco terminaron propiamente sus operaciones en al

interior de México, y con la toma de esta plaza comienzan

las operaciones militares del ejército federal bajo las órde-

ves del Excelentísimo Sr. D. Santos Degollado.

AsarTo 05 GranaLAJana.—Todo el día 27 los fuegos es-

tuvieron pausadísimos, hasta las 62 de la tarde, cuando los

«me operaban bajo las órdenes del Sr. Degollado abrieron sus

fuegos y a poco rato se comunicó la orden de asalto, Toda

rnestra fuerza avanzó simultáneamente, recibiendo y lacien-

do 1 fuego mortífero; el enemigo, aprovechando lo ventajo-

sísimo de sus fortificaciones, hizo por un corto rato nu es-

fuero desesperado por sostenerse, pero todo fué en vano,

pues el entusiasmo de los nuestros era grande, y en menos

de dos horas entraron a la plaza y ocupaban el Palacio de

wa eludad que nea en nuestras qnerras civiles había sido

ocupada por los que la atacaban.—ué una noche horrorosa,

y siempre haré recuerdo de las atrocidades que presenció

en esta noche de fuego, sangre y latrocinio.—La noche esta-

ba obscura, y el estallido del cañón, de los rífles y pistolas

nos hacían pensar en que ninguno sabía si amanecería o no

vivo—Fué imposible contener el saqueo que pronto comen-

76, qero siguiera se evitó que los destrozos fueran tan

grandes como se temía hubieran sido—En los momentos

de formalizarse el asalto, recibí órdenes para que con la re-

serva me incorporara a las colomnas que bajo las órdenes

del Caronel D. Pedro Hinojosa, asaltaron los fortínes de la

izquierda enemiga. Exto, lo ejeenté ntravesando los fuegos

«ue aunque nntridos no me causaron ninznna pérdida.——

Fuí el primero que con mi fMerza ocupé los dos Pahicios

conocidos con los nombres del elerieal y el Seminario, en-

contrándume eu ambos puntos unos 12 enras, entre ellos el

señor enva Castro, hermano del Gobernador Castro de Zaea

fecar. En el Seminario está el hospital de sangre asistido

por las Termanas de Ja Caridad, y aunque cuando entré

O Biblioteca Nacional de España

La DIARIO DEL COMONEL VALUES

estaban muy asustadas, pronto logré apaciguarlas.—Babien

do amunecido completamente se descubrió que el enemigo se

había encerrado en San Franciseo que estaba completamen-

te fortificado. Se le dirigieron algunas piezas, y como a las

11 del día enviaron ima bandera blanea pidiendo mi ar

misticio. El resultado ba sido que a Blancarte y a toda si

oficialidad se le garantiza la vida sujetándose a la Constítu

ción y jurando no volver a tomar las armas contra sus auto

ridades—Se supone que a Blancarte <e le sujetará a un

Consejo de Guerra-—Nada se sabe del asesino Casanova,

y muchos aseguran que fué uno de los primeros que se fu-

guron de la plaza.—Nos habían asegurado que no pasaban

de 800 hombres los que ocupaban la plaza en su defensa,

y después de tomada vimos que pasaba de 2,000,

Dia 29—Como a las 9 de la mañana se dexcubrió que Pié-

lago, el infame asesino del Dr. Ierrera y Cairo, estaba en

el Consnlado francés, y al condncirlo a Palacio aunque he-

rido, el pueblo inmenso que Menaha las calles y plaza, gri

taba: “Muera el asesino de Ferrera ”—Herrera, era hombre

popvlar y formaba la esperanza del Partido Liberal de Ja-

lisco. A poco rato de estar encapillado Piélazo, fué aprehen-

dido Monayo, eríminal muy afamado enya cabeza también

pedía el pueblo a grito abierto. Pronto recibieron los asi

Tios espirituales, y como a las 5 de la tarde en la presencia

de un inmenso gentío, Pidago fué conducido al Obispado y

colgado de un balcón, de modo que el cuerpo quedaba col-

zando de la entrada principal de Ja puerta. Así <> hizo, por-

«ue Piélago confesó que el asesinato había sido suzerido por

el Obispo Espinosa de esta Diócesis. En la plaza principal

se había puesto la horca para Monayo, y tan luego como

Piélago fué ejeentado, se sacaron al bandido Monayo y tam-

bién lo ahorearon.—¡Piélago er Corovel, y Movayo Tenien:

te Coronel del Ejército de las Garantías!—Ta ejeención de

estos dos criminales ha sido muy aplaudida por todos, y pa-

rece que aún quedan muehos casí tan malos como los dos

O Biblioteca Nacional de España

MEMORIAS DE LA GUBILA DE REFORNA La

malvados que hoy han sido ahorcados. —A Caxanova no se

le encuentra, y muchísimos desean que a Blanearte se le haga

1a operación que les hicieron a los dos bandidos Piélago y

Monayo.—Se aseguró hoy en Palacio que Emilio Rey, había

sido pasado por las armas en México, y que a Parrodi lo

tenían encapillado en la misma cindad para fusilarlo.

DIA 30.—Por los términos del tratado o promesa que el

Sr. Degollado hizo a Blanearte y demás Jefes y oficiales que

hasta ayer habían continuado en San Pranciseo, se les con-

cedió Ta vida y la Tibertad para salir de San Francisco, pero

quedando sujetos a las Teyes del país y a los reclamos de ter-

cero—Por esto fué que D. Pedro Ogazón, como Gobernador

de Jalisco, dió orden ayer para que Blancarte, el Lic. Ro:

drígnez y muchos otros Mueran arrestudos con el objeto de

sujetarlos a juicio por lo que habían hecho desde que se

habían pronunciado contra el Gobierno Constitucional hasta

la feeha.—Rodríguez, como fiseal de causas había sido el

verdugo de Casanova y Blanearte se Je suponía mucho peor

que a éstos. AT arrestarlo hizo armas y en el acto fué muer-

to por los que Hevaban la orden de aprehenderlo.—Esta ma-

Nana, el Coronel Rojas, de la brigada Rocha, con una fuerza

pasó a la casa del Sr. Alvarez, a donde desde anoche se había

mudado Blancarte, para mayor seguridad, pues temía que

en los momentos de la exaltación lo saenran de la suya y lo

alercaran como lo habían hecho en la tarde con Piélago

y Monayo. Unos aseguran que Blancarte hizo resistencia, y

que por esto lo mataron, y otros afirman que Rojas, con al.

gunos soldados pasó a la pieza que oenpaha y en el acto lo

mandó fusilar. Lo cierto es que causó una fuerte impresión

en el ánimo del St. Degollado, partientarmente, y que este

señor tan luego como supo lo que había sucedido, dió orden

para que aprehendieran a Rojas con el fin de sujeturlo a un

jnieio—Rojas se ha ausentado de la ciudad, y anque mu-

chísimos condenan el modo en que han matado a Blancarte,

todos confiesan que merecía la pena capital por los males

O Biblioteca Nacional de España

se mart DEL CONDNEL VALDES

inmensos que ha cansado aquí, y por la infemmia de haberse

pronunciado contra un gobierno a quien le había jurado

Tealtad.—Blancorte, debía su elevación al pueblo, y euando

se vió en el poder, tomó cartas con los enemigos de est mis-

mo pueblo para imponerle un despotismo atroz.—Su fin trá-

gico escarmentará los muchos que aín quedan, y que están

impuestos a sacrificar al mismo pueblo que los colma de be

neficios y honores.—Hoy el St. Degollado, le confirió el ¿ra

do de General de Prizada al ie. Coronado, y no sé enántos

más recibieron ascensos por la toma de esta plaza.

Dis 31.—Por orden superior, el General Rocha ha sido

arrestado, para contestar los cargos que contra él pueden re-

sultar por la no aprehensión del asesino de Tilancarte el ex

Teniente Coronel D. Antonio Rojas. El St. Rocha se en

cuentra en Jas mismas piezas que yo ocupo en el Hospicio.—

Por decreto de ayer se lo pone a Rojas fueva de la Ley, y a

la familia del finado Blanearte se le concede mua pensión

de 600 pesas aunales que pagará por mesadas la Jofatura de

Tacienda, del Estado de Jalisco. — Vanco, se ha retirado

de México, y agní el General en Jefe se dedica a a reorga-

nización de la fuerza que consiste en unos 4,000 hombrex.—

El Coronel Vargas, fué asesinado esta mañana por el pupu-

Jacho, y era uno de Tos que aquí consideraban hombre muy

perverso.—La chismografía en Palacio eausa nsombro, y la

organización de México es obra digna de un Flércnlos,

Noviemunr 1%.—Hoy es el día de Todos Santos, y las sal

vas de artillería, las colamnas de honor y felicitaciones

en Palacio, anunciaron que era el cumpleaños del General en

Jefe—La reorganización de las fuerzas continúa y no tiene

cnenta que estemos perdiendo el tiempo con estacionarnos

en las actuales circuustancias,

Día 2.—Nada de nuevo, y continñan los preparativos para

movernos cuanto antes—Por orden de la brigada se darú

un banquete a los jefes, gobernadores, etc., y al mismo tienr-

O Biblioteca Nacional de España

MEMONIAS"DE LA GUERRA DE REFORMA “

po se pronunciará una oración fánelre sobre la inerte del

finado General Núñez

Día 3.—Pasé el día en convidar al General on Jefe, Go-

bernadores, Presidente del Aymtamiento, Jefes de los cuer-

pos, ete., efc., para el banquete del 5 del corriente, que les de-

rá a brigada Coronado en el Maspicio.—Llegó Menoeal pero

nada nos trae de mevo—El General Rocha continúa arres-

tado en las piezas que yo ocupo—Es hombre muy vivo, y

todas las noches me cuenta alguna cosa de los hombres pú-

blicos de México. que sou de hastante provecho para los que

como yo, desean saber la verdad.

Día 4.—Hoy se comenzó a agarrar gente de leva para en-

«mvar las filas del ejército federal, y semejante medida es

por cierto un contraprineipio si consideramos las idens que

profesamos.—Se celebraron las excquins del ado General

Núñez, con la mayor pompa, y a las ceremonias concurrieron

Tas amtoridades civiles y militares—¡Cosa extraña! Jos clé

vigos que hay cansado la actual guerra civil funcionan en

las exequias de uno que murió peleando contra ms fueros y

aWnsos, y que según ellos, eran vn hereje.—Náñoz, amenmbió

en el nsedio de esta plaza

Dis 5—Se pasó revista de Comisario y mañana será pa-

gada la fuerza.—Se habla de movimientos de las fuerzas,

sobre Tepic, San Juan, Lagos y la Villita. A Tepic irá Chés-

man, Coronado a San Juan e Minojosa a quien han dado el

grado de General irá a la Villita—A1 mismo tiempo, Arten-

ga avanzará a Lagos y de esta manera se podrá obrar en com-

binnción de ma manera efectiva—Lo cierto 0x que se está

perdiendo el tiempo, y que enanto antes deberíamos mover-

nos.—Nada sabemos de los movimientos enemigos. y Rlanco

después de retirarse de México, se ha replegado a Morelia.

—Tlegó el Gobernador de Zacatecas, Lic. D. Jestia 6, Orte-

ea acompañado de varios aficiales pertenecientes a las fuer:

208 de aquel Estado.

O Biblioteca Nacional de España

MARIO DEL CONONKL, VALUES

Día 6—El banquete que Coronado quedó a dar ayer al

General en Jefe, ete, ete, no ke dió porque al hacer las

cuentas vió ¡¡que costaba muy caro!!..... nada se ha he-

cho, y entretanto hablan de movimientos nadie se mueve—

Ta fnerza que expediciona sobre Tepic, la mandará en Jefo

el Coronel D. Manuel Menocal. Es hombre bastante ori-

ginal y vivo este Sr. Menocal.

Día 7.—Legó la noticia esta mañana de que Márquez,

con unos 2,500 0 3,000 hombres, avanza sobre esta ciadad,

y para evitar que se dé el trabajo de venir tan tejos, hoy

han comenzado a salir fuerzas de las tres armas para mar-

carle el alto en los puentes de Guadalajara y Calderón—

Salió Coronado, con su fuerza, después de habérsele sepa-

rado el Gobernador de San Luis y muehos de los oficiales.—

Este Coronado, en quien tanto me había yo equivocado, deja

aquí una pésima fuma y no es hombre en quien se puede

poner la más leve confianza-—La expedición sobre Tepic se

abandonó porque éste se pronunció por el orden legal-—Sa-

lió en libertad el General Rocha, y tan no merecía lo que

han hecho con él, que le han dado el grado efectivo de Ge-

neral de Brigada—Se presentan algunas dificultades res

pecto de las fuerzas de Zacatecas que intentan darle a ETi-

nojasa.—-El único que se opone es el Coronel Castro, una de

aquellas mulidades que perjudican al país con tomar parte

en nuestra política.

Tía S—Continñan saliendo las fuerzas con el objeto de

hatir a Mámuez, y no tememos el resnltado—Salió el Cio-

hernador de Zacatecas, y se arregló todo de tal manera, que

mañana saldrá Minojosa a tomar el mando de los zacateca-

mos. Yo lo acompaño en unión de nuehos otros. — Por mi

conducta en el asalto y toma de esta plaza, se me daré el

gvulo de Teniente Coronel de Caballería.

Dra 9—Continúan saliendo las fuerzas pura el Puente,

aunque a punto Ajo no se sabe dónde estará ya Márquez y

O Biblioteca Nacional de España

nnMORiAS DE LA GURNEA DE REFORMA "

sus crneeros—La elaboración de parque continta—Es de

sentirse que algunos de los que el Sr. Degollado -ha colocado

en el ejército federal sean hombres cuya lealtad no ex a to-

da prueba.—Sin embargo de esto, no se teme ningún desea

labro. -

Día 10.—Salimos de Guadalajara unas 30 a 40 personas

para incorporarnos a las fuerzas de Zacatecas que están en

el Tenl y que militarán bajo las órdenes de Hinojosa—

Pasamos por la Escoba y por un camino pésimo Negamos a

In miserable hacienda de Milpillas. ¡Dios me libre de seme-

jantes haciendas!—En la Escoba estú una fábrica de mantas

perteneciente al agiotista Escandón.

Dis 11.—Salimos de Milpillas, y después de pasur la du-

vísima cuesta del “Pie del Escalón,” llegamos a un pobre

pueblo Tamado San Cristóbal, que entre las montañas que-

da en la orilla del río del mismo nombre. El río lo pasaron

las bestias a nado, y nuestros equipajes se pasaron en una

mal construída canoa. Armgue llegamos temprano, nos que-

damos esta noche por lo muy maltratado de la renmáa.

Dia 12—Salimos de San Cristóbal y pernoctamos en la

Estanznela, hacienda perteneciente a Zacateeas—El camí.

no estaba muy pesado, y partienlarmente la subida del Cerro

del Malacate.—Las labores y platanales en los valles y ca-

fadas, presentaban por casi todo el camino unas vistas pin

torescas y hermosísimas.— Masta hoy, el camino ha sido

desde que salimos de Guadalajara, por sobre montañas más

o menos elevadas,

Día 18.—Salimos de la Estanzuela y atravesamos monta-

ñas.—Legamos a la Villa del Tent como a las 3 de la tarde.

—Por orden del Sr. Degollado, unos 500 hombres de la fuer-

70 de Zacatecas que se hallan aquí, salieron esta mañaña

bajo las órdenes de Alatorre a situarse en Queenitlán y ser-

virán como cuerpo de obvervación.—Esta fuerza con los 400

O Biblioteca Nacional de España

Lo DIARIO DEL, CORONEL VALDES

más que quedan ev ésta, forman la fuerza que manda Fino

jos. Aquí se encuentra el personal del Gobierno Constitu-

cional de Zacatecas,

Día 14.—En el Tenl.—Se recibió el General ITinojosn de

las fuerzas, y el Gobernador de Zacatecas se mnestra deseoso

de obrar con toda energía y lealtad para que el Estado de

su mando tome la iniciativa en las operaciones militares qua

se emprenderán en esta parte de la República.—Se recibió

correo de Zacatecas cuya plaza la abandonó el enemigo tan

luego como supo de la toma de Guadalajara. —El Goberna-

dor Ortega sale por la mañana para llegar cuanto antes a

la capital del Estado y continnar la reorganización de fuer

705, agenciar recnrsos, ete.—Las fuerzas saldrán por la min

fana para Zaentecas, y hasta ahora las cosas se nos presen

tan bastante favorables.

Dis 15—Axer a uma hora avanzada de la noche Negaron

órdenes del Sr. Degollado, para que esta fuerza so moviera

a reforzar la cindad de Guadalajara.—El enemigo se retiró,

y ha tomado posiciones indieando que agarda refnerzos.—

Salió el Sr. Ortega para Zacatecas, Hevándose la artillería

que no nos acompaña porque el camino que Mevaremos 10 10

permite—A lus 113 salimos de San Juan del Tenl y pernoc-

tamos en Cruz Grande.—El camino es dnrísimo, y en algu

nas partes teníamos que tirarnos a pie.

Día 16 —Salimos de Cruz Grande, y después de nbir y

hajar barranens infernales, legnmos al pueblo de San Juan

de Cospala, donde pernoetamos.—Anoche se desertaron 18 de

la compañía de Jerez, además de los doce pelados que del

Tenl habían traído al General en mna emmilla.

Dia 17.—Salimos de Cospala y pernoctamos en Jesíís Ma-

ría —EI camino ha estado hoy como ayer, y atravesando ha-

rrancas y enestas, legumos ya tarde a esto miserable rancho

cnya pobre gente, como en los demás ranchos del tránsito,

O Biblioteca Nacional de España

MEMORIAS DE LA GUENRA DE REFORMA E

se queja de los daños que las fuerzas de Castro, les han he-

cho al pasar por aquí ayer. Estas fuerzas son de esta bri-

vada, y pronto veremos de qué manera hacerlos más hombres

de bien a esta chnsma de zaragutes.

Dix 18—Salimos de Jesís María y pernoctamos en Ix-

tulmacán del Río—Todos estos pueblos por donde hemos

pasado, son asaltados y robados por diferentes gavillas de

ladrones cada vez que a estos bandidos se les antoja hacer-

lo, y me aseguraron que los del pueblo de San Cristóbal, sin

excepción de personas, xo ladrones muy emmocidos—Todo

este terreno, por su naturaleza, es propio para que los ladro-

nes se pongan a salvo de los que los persiguen y es de lamen-

favse que las continnas revueltas en el país, tanto favorezcan

a estos foragidos.—Amn esta población de Txtlahuacin, a ve-

ces ha sido saqueada por los Jadrones, sin embargo de ostar

A nas $ legnas de Guadolajara, la capital del poderoso y

opulento Estado de Jalisco—La pobre México necesita de

wa hombre de firmeza y verdadero patriotismo, que enfre.

nando a tanto revolucionario de oficio, asegure la tranqui

Tidad y el reinado de la Tey en el país.—Se necesita cuando

menos una horca en cada una de las poblaciones del país.

y mientras esto no suceda no tendremos nada de meno en la

República.

Día 19—Salimos de Ixtlalmacán, llegamos a Guadalaja

ya como a las 4 de la tarde.—El enemigo se está fortifican

do entre los Puentes de Tololotlán y Caldorán, después de

que fué repulsado las tres veces que hizo por forzar el pri

mero de los puentes expresados —Toda la brigada se acnar-

teló en el Hospicio. y mañana se le dará a reconocer a Mi

nojosa como General en Jefe de ella—Tas probabilidades

son, que Márquez será derrotado, y en fal caso la tal con:

tienda de hecho habrá terminado en favor de la cansa Cons:

titueional.

Día 20.—Se arreglaron satiefuetoriamente alennos asun-

O Biblioteca Nacional de España

DIARIO DEL CONENEL, TALES

tos del servicio, y se ordenó que Ja artillería saliera dejando

aquí a los artilleros y caballería.—Me encontró a los Goher-

nadores Berduzco y Ogazón, tan amignbles como siempre,

y resneltos a contrariar los planes de enalquiera que in-

tente desvirtuar la revolución.—Es menester mucho cuida-

do para evitar que se nos entronicen ciertos espeentadores

en política" que para sacar ventajas personales han tomado

parte en favor de la causa de los pueblos. Los asesinatos

de Ixtlán, han causado horror y los foragidos Lozada y It

vas que los cometieron son tan malos como Piélago y Mona-

yo—Muchos oficiales de los juramentados después de la

toma de esta plaza, se hallan prestando sus beneméritos ser-

vicios al lado de Márquez. — Lección para los necios que

creían a semejantes hombres. —Otros de los prisioneros he-

elws aquí, han sido recibidos en mmestras filas, y con este

hecho el Sr. Degollado se desvirtúa y desprestiia ante mu

chos de nuestro partido.

Dia 21.—Hinojosa continúa enfermo.—YNada se ha hecho

en el Puente y el enemigo continúa fortificiándose—Llega

ron de Morclia 27 mulas cargadas de plata, y de ésta se le

dará al Sr. Degollado la que necesite, o toda, si la quiere.

—En México se están fortifiando y a Fanco, lo engañaron

Jos zaragates de aquella Babilonia, con hacerle creer que se

pronunciarían en caso de aproximarse con su fuerza.—Nada

de eso hicieron, y Blanco se retiró dejando bien puesto

el nombre de las fuerzas bajo sus órdenes—La mayor parte

de los rifleros que acompañaban a Blanco se han ido a sus

casas en conseenencia de las órdenes de Vidamrri—Muehos

han sentido esto, y Vidaneri uo podrá justificar semejante

conducta.

Día 22—Nada de nuevo—Ahora se asegura que el miér-

coles o jueves de esta semana mnestra fuerza tomando la

ofensiva atucará al enemigo en sus atrincheramientos—El

Gohierno del Estado le ha impuesto al comercio de esta cin:

O Biblioteca Nacional de España

MENOWIAS DES LA GURINRA DE: REFORMA Les

dad, un préstuno de $30,000; de esta cantidad se le deben

$20,000 a Ja tropa.

Día 23.—Los repiques a vuelo amnciaron hoy a las 12.

que el enemigo se ha retirado, y que a las 8 de la mañana

de hoy, levantó su campo.—No sabemos si continuará su re-

tirada, o se fortificará en el Puente de Calderón.—Se corre

la voz muy válida que en México se han pronunciado y que

el barajero Zuloaga Mé pasado por las armas.—Semejantos

excuineles no merecen los honores de ser fusilados, y nua

Wena cuerda es más a propósito para el castigo que mere-

cen-—Esta noche, en el teatro estuvieron muchos «le los je-

fos y oficiales que habían estado en el puente

Día 24—-Según noticias, el enemigo continúa su retirada.

—Severo Rodríguez, legó hoy, y se queja amargamente de

los trabajos que han pasado los del Norte que acompañan

a Blanco, debido a la indiferencia de este xeñor.—Se comen

76 la recaudación del préstamo de 930,000 que se dedican al

sostén del ejército federal.

Dia 25.—Muehos hurregos en la plaza—Se recibió noticia

de que Jas fuerzas del Norte estaban en Tula, Matehuala y el

Cedral.—Las fuerzas enemigas que habían legado hasta La-

205, regresaron a México, y Márquez continúa su retirada

—Se asegura que Trejo, quien defendía el Castillo de Pero-

te, se rindió por fala de víveres, y que él con toda su oficia-

lidad fueron pasados por Jas armas.—-El Obispo de esta Dió-

cosis se ¡ba para San Francine de California, y después se

embarcaría para Europa. Dios lo lleve por donde haga me:

mos daño que el que ha hecho en este pobre país!—Por el

rmmbo de Mazatlán la canso del pueblo triufa—Puea con.

currencia en el teatro, anime desde ayer se ha comenzado

a notar la mayor actividad por toda la cindad.

Dia 26.—Enfermo y no salí en todo el día—Fl Goberna

dor Rerduzco nos envió a ver y nos dice que no «lenemos ni

O Biblioteca Nacional de España

E Marto DEL COMONEL KALUES

ta palabra de noticias—Los que tomaron a Mazatlán, han

escrito al St. Degollado, ofreciéndole 1,500 hombres—Aque-

Ms fuerzas se componen de las de Sonora y Sinaloa,

Dra 27.—Regresó del Puente el Sr. Degollado, y el grue-

s0 de las fuerzas se han movido en seguimiento de Márquez.

—yada de México, y lo de Trejo dicen que es mentira, y

que el lobo carnívoro de Echagaray, se ha pronunciado por

la Constimción—Estos villanos serían capaces, por tal de

quedar bien parados, de pronunciarse por el mismo Lucifer.

—Esta noche hace un mes que asaltamos esta plaza, y que

yo con muchos otros compañeros me vi en tanto peligro. ¡ Ví-

cisitudes humanas! este apunte lo hago tranquilo en los al-

tos de una de Jus mejores casas en el corazón de la ciudad.

Se asegura que Carhajal, Zayas, Aramberri y Zuazua, se han

posesionado de San Luis—¡Dios lo quiera!

Día 28.—Megaron esta tarde de Zapotlanejo, los Genera-

Tex Eauco y Coronado. Al primero lo vi en el teatro y me

saludó lleno de cariño—Se confirmó la noticia de que las

fnerzas de Nuevo León y Coalmila y Tamaulipas, están en

San Luis Potosí.—Ta ciudad se muestra lleva de vida, y el

teatro esta noche estuvo muy concurrido.—El trínnfo de

muestra cansa es infalible.

Dia 29.—Salieron esta tarde para Tepie unos 300 how

bres del batallón de Zacatecas —Vos vino a ver el General

D. Miguel Tilaneo, enya brigada se ha rennido con la de Co-

ronado—El enemigo continúa desde ayer su eamino hacia

Tagos.

Dia 30,.—Se recibieron noticias de la derrota de los reac-

cionardos en Etzatlán, sufriendo los nuestros una pérdida de

40 entre muertos y heridos—Se impuso nn préstamo de cien:

to cinenenta mil pesos, al comercio y hacendados de la cin-

dnd —Se dará la ley suprimiendo aquellos conventos que no

están en el Estado, que según las buses de su institución de.

O Biblioteca Nacional de España

MEMORIAS DE LA GUENEA DE REFORMA La

herían estar organizados.—Vedidas a medias, y la mísma

falta de resolución de siempre.—BSalieron Blanco y los que

le acompañan a reunirse con sus fuerzas.

Diciesmer 1%—Hegó el General Arteaga—Se dió orden

para que los cabecillas capturados en Etzatlán sean pusa-

des por las armas.—El enemigo continúa en Tepatitlán sin

duda aguardando refuerzos —Eu Zacatecas, después de la

llegada del Ciobermador Ortega a aquella eindud, el pueblo

cometió las mayores atrocidades contra las casas de los con-

servadores. Conseenencia de la atroz conducta que Márquez

en aquellos preblos obxervó von los liberales.

Dis 2—Se pasó revista de Comisario —Todo guarda s/a-

1 que.—Nada de nuevo, y el enemigo en Tepatitlán.—Nues-

tra inactividad no me nsta, y me hace recoriar lo que sn-

cedió después de oenpada la plaza de San Tis, a mediados

de este año,

Dí 3—Los primeros reaccionarios hechos prisioneros en

Etzatlán, pasan de 300 y tantos, se incorporarán en los di.

feremtos cuerpos del ejército federal.—Nada de nuevo, y con-

timamos en la inactividad, dando tiempo al enemigo para

que se reovganice,

Día 4—8e asegura que Márquez, ha hecho movimiento

sobre Lazos. —300 reaccionarios capturados en Etzatlán.

servirán como castigo seis años en el ejército.—Pésima po

Mítica—Yueatán xe pronunció por la Constitución de 57,

Día 5.—Anoche legó el Sr. Terdo de Tejada para que

preste el auxilio de xus Juces financieras, y proponga los me-

dios de agenciar recnrsos—Con las persecuciones quer e

han hecho sufrir los reaccionarios, se ha convertido en puro

y YA se convencerán los conservadores vergonzantes conocidos

con el nombre de moderados, que ningún bien puede resultar

de sus favoritas medidas a medias—En el tentro me pre:

sentaron al General Arteaga, Gobernador Constitucional de

O Biblioteca Nacional de España

D mIANIO DI CONINEN, VALDE

Querétaro.—Es hombre joven y lo consideran puro descit-

misndo en política—Nada se ha resnelto tocante ala sm

presión de ciertos conventos de esta ciudad.

Día 6.—Se ha determinado intervenir en el convento de

la Merced, enyo Prior facilitó fondos a los traidores de Ta-

enbaya.—Visité a D. Miguel Lerdo de Tejada, cuya célebre

ley de desamortización convirtió a mestro clero en conspira

dores públicos contra la Constitución de 57.—Sus ¡dens son

en grado eminente progresistas, y está por la dictadura con

el fin de levar a cabo lus medidas que tanto necesitamos

para conquistar principios.—Propone que nos hagamos de

recursos con el fi de lograr el triunfo enanto antes, con

quitarle al clero sumas iguales a las que éste le ha facilita-

do al traidor Zuloaga, y opina que de este modo, en medio

de la misma revolución se efectíen medidas que darán re.

sultados fovorables para el pueblo—Entiendo que la ¡dea

la adoptará el Sr. Degollado. como provideneia xmgevida

por Ta política y el interés del cindadano.—Nada sabemos

de Jas intenejones del enemigo en Tepatitlún

Dia 7.—So derogó el decreto de 29 del próximo pasado

que impuso un préstamo de $150,000. como también el que

prohibió a los jefes y ofieiales de meras que tomaran gana-

do, pasturas, ete, sin pagarias o sólo dando los correspon.

dientes recibos.—Tas rentas del convento de la Merced se

dedicarán por mitades al Hospital y a la Justrneción Pri-

maria.—A mejores objetos no se pnede dedicar ningún fondo.

Dia $.—Et peladito Miramón llegó al cuartel general de

Márquez en Tepatitlán aver, y se supone que havú en él todo

un esfuerzo para forzar mmestra posición del Puente de To-

Jototlán. Le ha de cansar su dolor de cabeza hacerlo —Esta

tarde salió para el Puente el Sr. Degollado, y por la mañana

saldrán Mocha, CruzAcdo y varios otros oliciales—La en-

formedad de Trinojosa me detiene aquí por ahora, y veremos

O Biblioteca Nacional de España

MEMORIAS DE La GUBRA DE REFORMA Ce

en qué predo servir—Con la enfermedad de Hinojusa se

nos hay seguido graves perjuicios.

Día 9.—Se corre la voz de que se trata de nn promineia-

miento en esta plaza, pero no es probable que sea verdad.—

11 Sr. Degollado, a dado sulvo-onduetos 2 todos los que

capitularon cuando la toma de esta plaza. Semejante polí-

tica es muy propia para que munea tengamos paz ni seguri

dad en el país —Faitan Cicerones y faltan Catilinas (sic).

Nada sabemos del Puente.

Dra 10.—Ni uma palabra de noticias del Pnente—Se pu-

Micó el desroto que impone a! clero un préstamo de dos y

medio millones de pesos, y se le impondrán cuantas cantida-

des más le faciliten al amado gobierno del traidor Zuloaga.

Dia 11.—Los reuecionarios bajo el mando del peladito Mi-

ramón, reconocieron hoy nuestras posiciones en el Puente de

Tololottán, y se asegura que mañana las atacarán.—Por mi

descracia, no sólo continúa enfermo Hinojosa, sino que yo

también estoy en manos del médico.—Paciencia: xe continúa

el rmmor de que intentan un pronunciamiento, aquí, y bien

se conoce que las miserables medidas a medias de nuestros

hombres al frente de la cosa pública los da ánimo a los que

mada temen aun en caso de ser cogidos infraganti.

Dis 12—Día de Nuestra Señora de Guadalupe—El ene-

migo no se ha resuelto a ntacar las posiciones nuestras, y

trata de pasar el río evadiendo el paso del puente.—Esta tar

de salió ma pieza de erneso calibre con nas treinta y tantas

mulas cargadas de parque para mestro eampo.—So asen

ri que el Sr. Degollado recibió parte oficial de la ocupación

de San Luis por las fuerzas del Norte.

Dia 13.—El enemigo ayer hizo por pasar el río por dos

diferentes puntos, queriendo así flanquenr nuestra posición

del puente de Tololotlán —Pué rechazado con hustante pér-

O Biblioteca Nacional de España

E otanto vel CORONEL VALDES

didn.—Los españoles, de nnevo nos amenazan £op la guerra,

y el Presidente Juárez, conjura a todos los mexicanos sin

excepción de partido a que xe remman con el objeto de hacer

frente al enemigo común, Exto no sucederá, pues desgracia:

damente el enemigo ha sido llamado por el Clero y los con-

servadures.—Si la invasión se verifica, no es dable calcular

cnáles serán los resultados ni el desenlace final de la defini

tiva que México tendría que sostenor.—Ex tristísimo creer

que en ol país abmidan traidores, y que an no figura en la

vida pública ningún hombre que les aplique el castigo que

la ley previene que deban sufrir semejantes criminales.

Dia 14.—Como a las seis de la tarde el General Huerta

recibió un extraordinario del Sr. Degollado, poniendo en su

conocimiento que el enemigo había pasado el río por el paso

de Areqmiza, y dicho señor aconsejaba la evacuación de la

plaza—El General Pinzón, mandaba la fuerza encargada

de la defensa del paso de Atequiza, y no se sube si el ene-

migo logró xu objeto 0 no, en consecuencia del desenido 0 im

pericia de dicho Pinzón. Lo cierto es, que los nestros se ba-

tíam en retirada, y que hubo xa alarma en la eindad.—A las 12

de Ta noche, Tas Merzas que quedaban en a plaza, empren.

dieron sar marcha, acompañados del Gobierno Constincionar

de Julisco, muchos otros empleados e infinidad de partien

hivos, enyo mayor erimen ox el de ser liberales. El aconr

pañamiento me hizo recordar mestra salida de Guanajuato.

Los de Zacatecas (Guardia Nacional) y parte del mima

de 4 de línea que era todo el querer de D. Santos Degolludo,

eran los que daban guarnición en Ta plaza.—Salió el parque

seguido de las zacatecanos, y apenas habían salido éstos

cuando el $2 se provanció, y al rito de Viva la Religión.

mataron al Mayor del enerpo —Nada positivo sabemos de

los hechos de armas de ayer, y nosotros llegamos amanecien:

do a San Agustín.—Antes de «alir el Sr. Iniestro, clavó la

única pieza que había quedado, y este hecho causó bastante

O Biblioteca Nacional de España

DEMORAS DE LA GUERRA DE REFORMA LA

disgusto.— Hinojosa contina enfermo, y se dió el cuso de

que Arteaga xe hmilara en el misto estado. Hoy sabremos

algunos pormenores,

Dix 5—Salimos ya tarde de Sun Agustín y llegamos

moy temprano a Santa Ana Acatlán—El pronunciamiento

del 49 de Tíneo. anoche al legar al puente, no tenía más ob-

jeta que el de desbandarse y robar, aunque en efecto hicieron

por asesinar al Mayor del cnerpo, Salgado, quien esta tarde

me contó lo que pasó.—El batallón de Morelia fué hecho pri-

sionero y formado aparte de la brigada Pinzón—Aún no

sabemos pormenores pero lo cierto es, que no ha habido nada

de derrota, aunque los nuestros han abandonado sus posi-

ciones.—Aún nos queda fuerza smáciente para volver a la

enrga, y lo haremos.

Día 16—La mayor parte de Lt fuerza, pasando por Santa

Ana Acntlán, pernoctó en Azaeualeo de Torres.—A la ori-

Ma de da Laguna sobre la enal se halla esta Villa, el Jefe

de Jo Insirgentes, Torres, derrotó en 1810, a los Realistas

que bajo las órdenes de Batres y otros, silieron de Guadala-.

jura para atacarlos.—Ta pérdida total que en la acción an-

tier perdió el ejército federal, consiste de unos cuantos muer-

tos. muy pocos heridos y dox homberos—Todos los jefes,

oficiales y tropa vienen preguntando, que por qué se retira

von y dejaron el campo al enemigo, A timehos he oido decir

que ni anta saben quién daría la orden pura que se retiraran.

ET General Pinzón, abandonó el pasa del río que cubría

vin siquiera destruir lax canvas que estaban por este lado

y de has cuales se aprovechó el enemigo—la pérdida total

de Pinzón, según muchos aseguran, consistió eu un arriero

que andaba enidando sus mulas.—Lo cierto es, que ningún

jefe u oficial de nota se ha echado menos, y aquí viene todo

el ejército con su parque y artillevía.—Por deszracia so ge

neraliza muelo la idea de que la camarilla que roden al se-

ñor Degollado, no es la que lo sacará de apuros en caso de

O Biblioteca Nacional de España

100 DIARIO DEL CORONEL VALDES "

haber algo serio entre manos.—Los rifleros del Norte y el

5. que manda Rocha, cubrieron la retirada, y ésta se efec

tiña en orden, y sin sufrir pérdidas de ninguna clase. Ahora

en la noche he sabido, que los defensores de las garinríns,

tan lego como entraron ayer a Guadalajara, pasaron por

las armas a tres comisarios, además de varios partiemtaros.

por el crimen de ser liberales. —Lo bueno es, que enando hay

modo de poner un dique a estas atrocidades, os jofex de

nuestra causa les dan salvo conducto a los que mejor mere-

cen ima horee por sus crímenes—Ya veremos, hasta enándo

continuarán estas torpes medidas a medias.

Día 17.—Se hizo jornada a Sayula, población roja envas

casas tienen en su mayor parte los rótulos de “Viva la Cons-

titueión de 1857" “Viva la federación” y muehos otros que

indican el espíritu progresista de smx habitantes. — Esta

mañana antes de salir de Azacualco, se aseguraba que el

enemigo nos seguía, y sin embargo de esto los Generales

Milanco y Coronado, con sns respectivas fnerzas xe separaron

del ejército federal, tonando el camino de Morelia y el Bajío

“de Guanajuato. Semejante paso les hace muy poco honor, y

fué en realidad una deserción al frente del enemigo—Mu

chos se alegraron, no por Blanco, sino por Coronado, enya

reputación en las filas de estas fuerzas es malísima. Todos

creen que su único objeto es el pillaje y el rabo, y por esto

es que ha causado aleún asombro el hecho de haberse jun-

tado Blanco con él. La separación de Coronado es para esta

fuerza ma ganancia, aunque se pierden unos 1500 hombres,

Se ha resnelto aguardar al enemigo en un punto ¡media

to q esta población, que será fortificado bajo Ja inspceción

del Gobernador de Guanajuato, D. Franeisco Rerduzco, que

ha sido nombrado Jefe de los ingenteros—Pronto sabremos

si el enemigo nos segnirá o no.

Dis 18—Se dió orden de marcha, y después de que esta-

ban algunas de las fuerzas en camino, se dió contraorden,

O Biblioteca Nacional de España

MEMORIAS DE LA GUERRA DE REFORMA E

pero las piezas de grueso calibre con el General Tniestra,

contiunaron a Ciudad Guzmán.—Como a las 4 de la tarde

se dió aviso de que el enemigo estaba a 5 leguas de nosotros,

y eu el momento se dió la orden de marcha, y toda la fuerza

con el resto de la artillería llegará a esta cindad en esta no-

che. Mañana llegaremos a la memorable Barranca de 4tex-

quique, y tomaremos posiciones para aguardar al enemigo

en cunlquier número que se presente.—El secreto de nues

tra retirada consiste en que no tenemos bastante parque pa-

ra comprometer una batalla campal—Se presentó Rojas al

Sr. Deeullado, de mnevo, ofreciendo sus servicios con unos

300 hombres.—Rojas cs el que mató a Tilancarte, cnando

la toma de Guadalajara —El Sr. Degollado no quiso ni que

se le presentara.—Si el enemigo nos sigue a las Barrancos

sm derrota es casí imevitable—A la vista de esta ciudad está

el hermoso valeán de nieve de Zaporlán el Grande, que an-

teriormento era el nombre de la ciudad. De aquí era el va-

Tente hijo del pueblo D. Gordiano Guzmán, que fué fusila-

do en la época del bandido Alteza.—Al lado del volcán que

Nero dicho, está también el de Colima, y la vista de estos

dos voleanes nos sugiere ideas de la omnipotencia del

Creador.

Dia 19.—Satimos de Ciudad Guzmán, y pasindo lo céle-

bre barranca de Atenquique, pernocié en un miserable ran-

cho llamado “La Agua del Obispo” situado entre nn bosque

de pinos.—Pasó la mayor parte de la artillería, y mañana

comenzarán a ser colocadas pura defender el paso de la ba-

rranca.—La posición es ventajosfsima, y casí imposible que

el enemigo logre forzar el paso aun cuando aticara con

20.000 hombres. — La brigada Zacatecas, y el 5* de línea

bajo las órdenes de Rocha, segundo en Jefe, cubren la reti

rada con tres piezas, y esta noche llegarán a Cindad (uz

mán.—Aunque escasos de parque, nadie teme los remltados

aunque el enemigo nos sigue con 4,000 hombres y 34 piezas

O Biblioteca Nacional de España

102 DIARIO DEL CONONEE, VALDES _

de artillería.—Los restos del 4 de Jinea han sido refmdidos

en los demás enerpos, xy por orden general se manda que en

lo sucesivo vingin cuerpo será conocido con el nombre de

4 de Iínea.—Según cartas de Guadalajara, el enemizo en

aquella cindad ha cometido atrocidades contra muchas per-

sonas caracterizados por el Tiberalixmo de xix ideas. —Mien-

tras más se marque la línea de distinción entre los dos pur

tidos beligerantes, mejor para el ¡meblo.

Día 20.—En unión del St. Berduzco me pasé a la pobla

ción del Platanal—Siquiera hay agua y pasturas para las

bestias.—Los preparativos para la defensa de Menpuique

contivñan, y Dios quiera que alguno de los Sanchitos del se-

hor Degollado no hagan mna de has emyaw.—Se ha resuelto

avanzar + la inexpugnable barranca de Beltrán, porque la

de Atenquique es fampueable—Se quedarán en Atenuique

esta noche, 1,000 hombres y 3 piezas para entretener al ene

migo en caso de que éste avance de Zapotlán. —Blaneo y Co.

ronado han dejado la artillería que Tevahan con sus fuerzas,

y el Teniente Coronel Rojas Jus recogerá con nos 400 hom

bres que aisladamente obran por el otro lado de Atenqui

que —Algunas de las fuerzas están pasando ahora en la no-

che para Beltrán.

Día 21.—Permetamos en la hacienda de San Mareos que

está a la vista de Ja umy célebre barranca de Helrrón.—Ex-

fa barranca es por elerío un panto muy formidable, y faei

lísimo de xer defendido con hmen éxito por unos enantos

centenares de hombres contra casí enalquier número yn quí

siera forzar el paso—Los puntos dominantes, que son tros,

fueron fortificados desde Junio de este año, que el ejército

federal en muy corto número se retiró a esta harranca des

pués de a traición de Salamanea, y emvenios de Romita.—

El General Rocha, con 1,000 y tantos hombres y 3 piezas,

defenderá la de Atenquigne con el fin de dar tiempo para

que nuestra artillería llegue a Beltrán y sea colocada. —El

O Biblioteca Nacional de España

MEMORIAS DE LA CUBRRA DE REFORMA 1.

enemigo, desde Sayula destueó una fuerza de infantería y

caballería para el Jabalí único punto por donde el paso

de la harranea puede ser fanqueado. Para evitarlo, 52 des-

pacharon 200 hombres de Colima, y desde muy temprano

esta mañana salieron los Coronelos Cruz Aedo y Valle para

el mismo punto con el fin de protegerlo. —En vista de las po-

siciones que la barranca de Feltrán presenta, no creo que

el enemigo ge atreva a avanzar.—A las 11 de hoy, se oyó el

cañoneo en Menquique, pero ayuí no sabemos qué sería lo

que encedió—La mayor parte del parque ha Negado y está

de este lado de la barranca

Día 22.—Ahora pretenden que la barranca es flanqueable

por varios puntos, y para evitarlo se han destacado fuer-

7ax por diferentes rmmbos.—Lo cierto es, que el Sr. Degollado

mo 08 para el caso presente y xn conducta indien que no sabe

lo que hay entre manos.—Se habla melo de que el mando

en Jefe se le dé a Rocha, y si esto no se hace pronto, el ac-

tual desorden terminará en la disolución de la fuerza—La

fuerza viene pasando miserias, y esto ameede cuando ahora

he sabido que en Guadalajara se dejaron en depósito $40,000

en efectivo. ¿Con qué objeto se dejarían en aquella ciu-

dad?..... Estaremos a la expectativa, para mejor saber de

lo que son capaces los hombres de rirtud acrieolado en mi

pobre país natal.—Dime con quien andas y te diré quién

erex”—Lox furoritos del Sr. Degollado huelen a leche, y no

sou semejantes sabandijas lox que harán nada de provecho.

—Ex menester insistir en que Rocha acepte el mando en Je-

fe, pues los que a xangre fría hemos notado la conducta del

Sr, Degollado, estamos convencidos de an milidad. Sus vir-

tudes son negativas.—Esta mañana legó a esta hacienda el

Sr. Degollado, y la barranca de enquigue se le ha dejado

libre al enemigo. Pronto sabremos en lo que pararán estas

misas.—Esta tarde salió Hinojoxa para Colima, con-el fin

de curarse. Su enfermedad ha cansado bastante mala la

O Biblioteca Nacional de España

10 DIARIO DEL CORONEL, VALDES

exusal yo sms amigos —Se oyeron algunos tiros de cañón

por Atengwique, y después supe que eran del enemigo que

había comenzado a pasar la barranca.—El St. Oguzón, Go-

bernudor de Jalisco, está profundamente disgustado con la

conducta del Sr. Degollado, las de todos los que e rodean

Eje.)

Dia 23—AI último el Sr. Degollado, se convenció de su

ineptitud, y hoy puso una cominieación al General Roelin,

nombrándolo General en Jefe del ejército federal con todas

Tus fuenltados de uno en campaño.—lorha, se resiste a reci-

bir el mando en consecuencia de tener demasiado presente

la persecución que D. Santos, y sms Sanehitos le han hecho.

pero al último las observaciones que el Gohernador Ogazón,

el Dr. Ceballos y yo le hicimos, lo convencieron de la nece

sidad que había de que aceptara el nombramiento. Proba:

benente ahora en la noche se resolverá a aceptarlo, y en

caso de no hacerlo nada se hará, y la fuerza que todavía nos

queda se acabará de disolver —Todo se enenentra en el mayor

desorden y no debería cansar asombro si consideramos que

Benito Gómez Farias, es de-fucto el General on Jefe. :1¡Ta

suerte del gan partido liberal en manos de Tenita Gómez

Farias!!!—Nada «e sabe de los puntos por donde el enemigo

hará por pasar la barranca para volicar nuestra posición, y

ahora no más nos falta que se repita lo del paso del tío de

Tololotlán en Atequiza.....

Día 24.—Noehe Tena y en Tonila.—Nos movimos de San

Marcos, y al Negar a esta Villa se encontró el General en

Jefe con la novedad de que el grueso del enemigo en níme-

ro de unos 1,500 0 2,000 hombres, había pasado la barranca

prr el Paso del Novillo que queda unas 4 leguas abajo de

esta población-—En el Paso se hallaban unos 19 de los nues-

tros, y estos se retiraron al ver que el enemigo comenzó 1

pasar.—El General Rocha se fué de paso con su brigada y

dos piezas de montaña en easo de que haya tomado el camino

O Biblioteca Nacional de España

NENORTAS DE LA GURNRA DE REFORNA 105

de Colima, según aseguran algunos.—Cuanto se ha hecho

desde que se tomó la plaza de Guadalajara hasta la fecha

indica el mayor abandono y desorden, y para empeorar la si

mación, Roeha se niega a tomar el mando en Jefe de la pri-

mera División, alezando que nada lograría hacer en el es-

tado de desorden que esto se encuentra, y que sería cargar

con ma inmensa responsabilidad sin las probabilidades de

hacer algo de provecho, porque no hay tiempo para arreglar

mada—-El Sr, Degollado, se fué también de paso, y se habla

de una suspensión de armas... Malo está esto.... La bri-

gada de Zacatecas se quedó en el Paso de la Barranca, y de

poco 0 nada servirá si no logramos dar un golpe al enemigo

que ya tenemos por este lado, tan cerea del grnesn de muestra

fuerza. —Se me Imyó Elenteria, esta noche. Es Ja esposa de

m1 de mix criados que tanto quiero, y con tanta fidelidad

me acompaña. Esto me ha llenado de asombro, pues minque

muy joven, siempre la había considerado muy juiciosa.—Mi

pobre judio está mortificadísimo y llora como un niño

de pecho por lo que sn mujer ha hecho.—Me compadezco de

ella y de él. Juan, mí otro criado, es sm enñado de ella.

Día 25—En Tonila, población al pie de los voleanes de

Zapotlán. El primero de fuezo y el último de nieve. He pa-

sado el día en aetivar los movimientos de las diferentes par-

tidas que están púsaudo a incorporarse con el grueso de

vnestro ejército que va en persecución del enemigo—Todos

ascenran que el peladito Miramón manda los 1,5000 2,000

hombres que pasaron por el Paso del Novillo, y que desde

esta mañana se dirigieron a Colima, Los nuestros los siguen

y las probabilidades de acabar con ellos están en nuestro

favor.—Desde ayer tarde que en Colima supieron que el ene-

migo había pasado la barranca, empezaron a salirse de la

ciudad siv quedarse en ella una sola persona de representa-

ción.—Si el Sr. Degollado, con sus Sanchitos, se hace a un

O Biblioteca Nacional de España

106 DIARIO DEL CORONEL VALDES

lado, es probable que logremos la completa derrota del ene-

migo.—Ya veremos.

Dia 26.—Derrota del ejérvita federal. —Salk de Tonila con

algunos de caballería al vir el cañoneo por el rmbo de Co-

Tima.—En el camino me encontré con el Coronel Chexman

del 5 Regimiento, que herido we retiraba del cumpo de has

talla.—aA1 encontrarlo me dijo, que todo se había perdido,

habiendo enído el grueso de mestras fuerzas en mia embos-

cada que le pnso el enemigo. El desorden en que ihan los

nuestros, favoreció a los contrarios. Según informes, todo

se perdió, amnque hasta ahora nada de cierto sabemos de to-

do lo que se habrá perdido —Mucho de nuestro parque y

artillería con unos 400 de mi brigada de Zacatecas, se halla-

ha en el paso principal de ta barranca en la hacienda de

Sun Marcos —Pasando por Tonila, regresé hasta el Conejo,

donde me encontré con los Sres. Berduzco y Ogizón, Gaher:

nadores de Guanajuato y Jalisco. En nión de extus señores

estaba uva mmiltitud de empleados y partieulares. Todos

atravesamos el paso de Tenexeamilpa, atravesando nn cami

mo atroz, Megnmos los que veníamos por delante al pueblo

de Tecatitlán a las 113 de la noche, La noche era obsenta

y por una estrecha vereda veníamos temiendo por momentos

desbarrancarnos por algún precipicio—Si el Sr. Rocha, co-

mo muchos querían, hubiera aceptado el mando en Jefe desde

ahora 3 días, probablemente no Iamentaríamos la pérdida

de hoy, pero lo cierto es, que con no aceptarlo nos ha hecho

un daño terrible, quizá por elerto sin haherla intentado —

Por desgracia mestra, el recuerdo de los agravios que impo-

iíticamente la habían inferido D. Santos Degollado y sn ca-

marilla de fatnos, pudo más en el ánimo del Sr. Rocha, que

lux reflexiones que nmehos lo hicimos pura persadirlo a

«ue tomara el mando—aAntier en la presencia del señor

Gobernador Ogazón, le dije, que si no tomaha el mando, yo

a lo menos no ereía que salióramos con bien, pres todos es-

O Biblioteca Nacional de España

MENONIAS DE ZA GUERRA DE REFORMA 10

tán convencidos de la nulidad del Sr. Degollado, o mejor

dieho, de D. Benito Gómez Farías, que era quien todo lo

disponía y mandaba—Esta circunstaneia había ya eausado

el máx profndo disgusto, de manera, que aun antes de saber

los pormenores de la derrota de hor, los más les echan la

entpa al Sr. Degollado, y a la camarilla que tanto lo había

desprestigiado.—En el camino hemos xabido que el enemigo

«ue estaba en Atenquigue y Zapotlán, se había retirado des

de antier con toda <a artillería hacia Guadalajara. No sa-

bemos qué habrá cansado esta violenta contramarcha, y esto

prveba que no habíamos tenido ni aun exploradores que nos

dieran avisos de los movimientos del enemigo.—Entiendo que

desde antier salió Pedro Tinojosa, de Colima, y mo xé

qué rambo habrá tomado—Siento en el alma si enfermedad

y sabe Dios emándo nos volveremos a ver—Por ahora, nues:

tra intención ex la de ira Morelia, y y0, minque quebranta

do en mi salud, contimmaré mientras me dure el aliento, en

busca de ax que a mano armada tomen el campo contra la

elmsna que quiere destruir muestras libertades —Paciencia,

y continnemos llenos de fe y eonfanza, pues la cansa de la

libertad, añn tiene millares de valientes que la defenderán

a todo trance.——Cansado, y Teno de tristeza por el revés de

hoy, me uenesto, rozando al cielo, que uo abandone a Tie

que defendemos los derechos de la humanidad.

DIA 27,—A las 3 de la mañana nos pusimos en emnino, y

pasando par el pueblo de Tamaznia, Hegamos a la hacienda

de Contla, sin máx novedad que la de habernos alcanzado

altos de los dispersos en la ueción de Sa Joaquín. —Ven

20 muy malo de uy golpe que anoche recibí, y voy sufriendo

vn dolor terrible

Dia 28—Hicimos jornada al pueblo de San Cristóbal Ma-

zamitia. Llegué sufriendo un dolor terrible.—Poco después

de haber satido de la hacienda de Contla Hegó a ella el señor

Degollado, acompañado del General Iniestra y muchos de

O Biblioteca Nacional de España

10 PIANO DEL CORONEL VALDES _

sue affachés—Sún no sabemos quiénes de nuestros amigos

más conocidos morirían antier en la aceión-—Nos alcanza-

ron algunos dispersos.

Dis 29.—Hegó el Sr. Degollado con su plana mayor, y

toda Ja fuerza que se salvó, y que consiste en unos 1,500

hombres de caballería e infantería. Llegaron también Jos Ge

nevados Rocha, Arteaga y Pinzón—En la noehe se eclebró

ma junta en da cava del General en Jefe, con el objeto de

resolver lo que se debiera hacer para reorganizar las fuerzas

y ponerlas en campaña.—De muevo se le ofreció el mando al

Sr. Rocha, y de mevo no lo quiso aceptar.—Lo cierto vs

que vada se resolvió, aunque melo se habló.—Sin embargo

de lo prevenido el 19 para que el 49 de línea se refundiera

en los demás cuerpos, nada de esto se hizo, y en la aeción

del día 26 xe pasó al enemigo en los momentos más críticos

de la acción. Por las consideraciones guardadas indebida-

mente a algino de los oficiales de los de este cuerpo, no se

ejeentó mu orden que exigía imperiosamente el bien del

servicio de la cansa.—El Sr. Degollado, citó a los señores.

Terduzco y Ogazón, Gobernadores de Guanajuato y Jalisco,

para que mañana conferenciaran con él y resolver en vista

de «us opiniones lo que mejor convenga hacer para afrontar

1a situación

Día 30.—Se hizo jornada a Jiquilpan, en el Estado de Mi-

ehoacán, nmy inmediato a la Taguna de Chapala.—El señor

Degollado emplazó para esta noche la conferencia con los

Sres. Merduzco y Oguzón.—El Sr. Rocha se quedó en Maza

mitla con muehos de sns oficiales y tropa.—Mueho temo que

al último se pierda la mayor parte de la fuerza y que se con-

vierta en guerrillas, o mejor dicho, gavillas de hombres que

a la sombra de la Constitución, cometerán atrocidades por

todo el país—Y todo esto por falta de una cabeza capaz de

dirigir una empresa que son tan fáciles para muehos ham-

Tres de los que antes de ahora yo he conocido.

O Biblioteca Nacional de España

MENORIAS DE LA GUERRA DE REFORMA 1"

Tra 31.—Ultimo día del año de 1858, que pasa como todos

hemos de pasar, a la eternidad.—Se hizo jornada a Chavinda

y aquí pernoctó la mayor parte de la fuerza—AL llegar ma-

Tana a Zamora, se comenzará la reorganización de las fuer-

746 que por cierto vienen muy maltratadas—Es asombrosa

la constancia de los soldados mexicanos para smfrir traha

jos. Si fueran otros ya se hubieran deshandado todos. Cansa

dotor enando consideramos que gente tan sufrida y dócil. es

el jusuete de unos cuantos charlatanes e impocitos (?).—

Aquí como en Jiquilpan nos han dado pormenores de las atro-

cidades que Coronado ha venido cometiendo, y ex de sentirse

que la conducta vandálica de este hombre haya sido tan

atroz.

Extño 1% pe 1859.—En Zamora—Hoy eomenzó el año

del Señor de 1859, y rognemos al Dios Eteruo que en este

año mos colme de bendiciones e iInmine a los hijos de es-

fe país tan hermoso como desgraciado.—Foy hemos salido

del pronunciamiento de Tehegaray, en Ayutla en favor de..

ser él mismo Presidente de la República. ¡Es mucha abre:

gación!—Rohtes Pernela, también se pronunció en México

por la carta de 24.—Van dos.—Otro se pronunció en Ia Cin

Andela de México por la Constitución de 57, van tres.—Fl

barajero Zuloaga, que prófugo también es Presidente, van

cuatro, y D. Benito Juárez, que segin ln ley ejerce el Poder

Ejeentivo on Veracruz, constimye el quinto —Si no es esto

la esencia de la anarquía, no sé cómo ni de qué manera cali.

ficar estos acontecimientos —Se hormriza uno al oir en esta

ciudad, la condueta que de paso observó Coronado, y por

cierto que va dejando una fema muy asentada como ladrón

andaz.—Este malvado mérece una horca, y el que le enelene

le haría un favor a los que defienden la cansa de la libertad.

El hombre es un bandido.—Continñan llegando muchos xe-

forex de los que se han salido de sus casas para evitar las

persecuciones de los hombres de las garantías.

O Biblioteca Nacional de España

m0 DIARIO DEL CONONEL VALDES

Dis 2—Llegaron el General Hochi y muchos de los de

Guadalajara que se habían ido a Colima antes de la acción

de San Jeaquín el día 26.—La bola continúa en México, con

Robles Pezuela, Echegaray y el peladito Miramón que son

ta trinidad que xe encargarán de apueiguar al país —Lindos

pájaros —Un tal General Florencio Axperta, con sus mo-

chos se prominció por la Constitución de 1837, en Cuantla,

Morelos. Por un artíenlo se invita a los demás mohos para

«me secunden el plan ascgurániolex six empleos respreti-

róx—No sabemos de lo que se hará con las fuerzas que aquí

tenemos amuque el Generil Rocha se vielve a Jalisco con

unos 500 hombres que podrá rewnir—Vimos la proclama

«ue Coronado publicó en esta plaza en su tránsito y el descaro

con que miente este handido cansa asombro.—Se asegura que

los $00 hombres que con Sánchez Román, salieron de Gua

dalajura sobre Tepic, han sido derrotados por el bandido

Lozada en los “Cuartos. —En la trifulea murió José María

Montenegro, hijo de mí buen amigo T. Guadalmpe.

Día 8.—Salió la fuerza de Zamora y pernoctó en Thaza-

zalea.—Yo pornocté en el mexón antes de Negar al pueblo.—

El General ltocha y el Sr. Oguzón, se quedaron en Zamora,

y se vuelven a Jalisco con enanta fuerza puedan reunir con

el objeto de mantener viva la revolución en aquel Estado —

Dios Tos proteja y los leve con bien—Esta mañana legó

Pinzón a Zamora con su chusma, y se dirigirá n Morelin,

pues no quiso ir a Guanajuato, porque a presencia del xe-

Tor Berduzco impediría sus robos, Exte Pinzón y Corona-

do, harían moy buena pareja. Pobre México mientras se-

mejantes mandrias tengan que ver con la cosa pública —El

Sr. Tierduzco xe quedó en Zamora, y mañana se pondrá en

marcha para Morelia, en caso de no permitir el Sr. Degntla-

do que la brigada de Zacatecas se mueva sobre Guanajuato

como to deseamos. Con este fin se le puso una comunicación

al Sr. Degollado esta mañana, y en Tlazazalea aguardare.

O Biblioteca Nacional de España

MINONIAS DE LA GUERRA DE REFORMA mi

mos la contestación —La tropa no quiere ir a Morelia, y por

esta razón se nos desertaron en Zamora, 43 de la clase de

tropa.—YNo hay cabeza y cada uno hace Jo que se le antoja.

Lo que ahora nos conviene ex marchar cuanto antes sobre

Guanajuato.

Dix 4.—Al amanecer Negué a Thazazalea, y poco después

salió la fuerza de Zacatecas para Chmrineio donde pernoeta.

mos.—Me despedí del señor Gobernador de Jalisco D. Pe-

dro Ogizón, de xn Secretario 1. Tenacio T. Vallarta, del Ge-

merul Arteaga y varios otros que continmaron para Morelia.

Se recibió anoche el permiso del Sr. Degollado para que

la brigada de Zacatecas pase a Guanajuato, y con esto se

echan por tierra las intrigas del General Iniestra, de Bas-

uón y del charlatán Canto, quienes aspiraban al Gobierno

de Gina juato.—Una vez estando el St. Berduzco en el Esti

de de xt mando, él lex pondrá las peras a veintieineo a todos

ellos. —Se recibió aquí la noticia de la toma de Trapuato por

Pueblita, Blanco y el indio Coronado—Con ta toma de Tra-

puato, la caída de la capital ex segura,

Dis 5.—Se hizo jornada a Pulo Alto—En Umarán, pa-

sando el río de Salamanca entramos al célebre Tunjío de

Guanajuato, - Este río es la línea divisoria por este punto

entre los Estados de Michoacán y Guanajuato.—Esta tarde

<e adelantaron el Lie: Gadea, y los Sres. Reynoso y Mendoza

con-el fin de agenciar algunos reenrsos cn Pénjamo —La

amxencia del Sr. Nerduzco, me cansa alarma, pues ya ex

tiempo de enviar exploradores y saher en qué puntos se ha-

Ma el enemizo.—La fuerza que nos acompaña no se puede

batir en el estado que ahora se enenentra, y sir pronta reor-

somización ex indispensable,

Dix 6.—Elegamos a Pénjamo, y hallamos al Sr. Berduzco,

dictundo providencias para agenciur recursos con el fin de

socorrer a la fuerza, como en efecto se hizo hoy.—En Mé

O Biblioteca Nacional de España

Rs DIARIO DEL CONUNEL VALDES "

xico continúa la elaboración de pasteles, figurando en pri-

mer término Manuel Robles Pernela, bastante célebre por

la parte que tomó en la traición de Arroyozarco—Se pusie-

ron comunicaciones a Pueblita y Coronado, por el Sr. Ler-

duzco para que se pongan de aenerdo con nosotros en sus

operaciones militarge—Dicen que Blanco y Coromado se

han vuelto a Irapuato, y que la plaza de Guanajuato la de-

tienden 1,000 hombres que de Guadalajara vinieron con

de Ticéaga.

Día 7.—En Pénjamo —Liegó Licéngn con nues 50 hon

bres y pronto se comenzarán a reunir las diferentes parti

das sueltas de chinacos, que a la sombra de patentes dadas

por el Sr. Huerta, han cometido aleunos desmanes en esta

parte del Estado —Coronado, Pueblita y Pinzón, han co-

metido atrocidades por todos los pueblos del Bajío que han

legado a visitar. El menos disculpable es el indio Coronado,

«me ha extorsionado a los pueblos de su tránsito sin embargo

de levar miles de pesos en caja. Mientras más hemos sir

bido de Ja conducta atroz de este hombre, más erimival se

nos presenta. —Se socorrió a la oficialidad con enarta parte

de su haher mensual.—Se comenzó a devolver al comercio

particulares de aquí el dinero que ayer prestaron para <o-

correr a la tropa. ¿Cuánto de este dinero les Imbiera devurl

to Coronado?........

Día $.—En Pénjamo. —Se dice que Coronado, no entró a

Cmanajuato porque lo compraron para que se retirara, y

así lo hizo tomando el camino de San Miguel de Allende—

De paso envió a Celaya unos 300 hombres para exigir a la

cindad una contribución de $3,000.—En Irapuato, cometió

Tos robos más escandalosos, y toda la conducta de este hon.

bro es la de un handido sin principios y lealtad.—Continian

las órdenes para que los chinacos se reorganicen, y al último

algo haremos digno de lo que hemos sufrido por la cansa.

O Biblioteca Nacional de España

_ MEMORIAS DE TA GUBIRA DE REFORMA 1

Dra 9—En Cuitzeo de Abasolo—Fl enemigo se halla en

Irapuato $ leguas de este pueblo—Aún no se ha comen-

zado Ia reorganización de la caballería—Todos estos pue-

blos se encuentran plagados de ladrones, que en partidas de

20 0:30 hombres, se presentan fingiéndose constitncionalis-

tas, y exigen préstamos, caballos, ete, ete. Coronado por la

fuerza que le acompaña es el que se ha hecho más célebre.

¿Dios nos libre de semejantes partidarios del pueblo!

Dia 10—En Cuitreo.—Castro con los de Zacatecas se

separa mañana del Sr. Berduzco, y se replega a Zacatecas.

Ningún hombre de espíritu y patriotismo observaría seme-

jante conducta. Mejor es mm ejército de cerdos mandados

por mn león, que nn ejército de leones mandados por un

cerdo—Ayer estaba Coronado en Dolores, huyendo el bul-

to al enemigo. ¡Dignos defensores de nuestras libertades!—

Yo continaré al lado del Sr. Berdurco, mientras haya pro

habilidades de que este señor pueda organizar alguna fuerza.

Día 11—En Guanímaro—El Sr. Muerta con fecha 3 del

actual, amneia en su proclama al pueblo michoacano, nues-

tras desgracias en San Joaquín, los acontecimientos en Mé-

xico y su Arme intención de no transar con los enemigos de

la Constitución de 1857.—; Blusa y Constitución! Tal es el

programa del denodado Huerta—De Irapuato escriben que

de Licéaga salió en persecución de Coronado, qne con sus

robos leva el rumbo de la frontera.—Pueblita se haila en

Santiago, y Rocha salió de Zamora para Julisco con más

de 600 hombres.—Rocha es el hombre de la situación.—Cas-

tro. con vinos 200 hombres que habían quedado de la brigada

Zuentecas, se separó en Cnitzeo, y se fué para Zacatecas—

Semejante conducta es vergonzosa, y presenta de bulto una

prueba más de lo pernicioso que son a la misma eauxt los

que como este Castro no tienen ni patriotismo ni inteligen-

cia—Esto ha hecho sin embargo del compromiso contraído

en Zamora con el Sr. Berduzco.—Este es nn mal más de los

s

O Biblioteca Nacional de España

E DIARIO DEL CORONEL vALDNS

varios que nos han resultado con la enfermedad de Hino-

josa—El diablo cargó con todo debido a la enfermedad de

Pedro.

Dia 12—En Guantmaro.—Se pusieron comunicaciones al

Sr. Huerta, para que las fuerzas de Chacón, que acompañan

a Pueblita se incorporen a las de Guanajuato que acompa-

ñan al Sr. Berduzco.—Unos 200 del enemigo ocupan a Tra-

puato, y Pueblita está en Salvatierro.—Se fugaron esta no-

che mis indios Dámaso Ortiz con sm mujer Plenteria que

había vuelto a juntársele, y Juan a quien yo tanto quería

y en quien depositaba tanta confianza. Juan se ha de haber

ido seducido por el pícaro de Dámuso—Se levaron" nos

jorongos.

Día 13—En Yuriria, Pándaro.—Cerca de esta Villa está

una laguna que de buen pescado, y tiene además, un

buen convento de Agustinos, cuyo exterior indica el poder y

riqueza de esta orden en otros tiempos.—Gadea y Mendoza

se Meron al Valle de Santiago con el objeto de agenciar al-

gos recirsos.

Día 14—En Yuriria—Al salir nos encontramos con el

Coronel Núñez, quien nos informó que Pueblita había salido

de Salvatierra, y Aranda para el Valle de Santingo—Re-

gresamos a ésta, y se le puso uná comunicación a Pueblita

para saber en qué punto se podría ver el Sr. Berduzco con

él, como también para saber si les fuerzas de Aranda esta

bano no sujetas a 6l—Pueblita se retiró con dirección a

Morelia. —Llegaron los Sres, Gadea y Mendoza, del Valle de

Santiago.

Día 15—En Salvatierra.—Pueblita aún estaba en esta

ciudad y el Sr. Terduzco pasó a ella con el objeto de ver si

podía arreglar con Pueblita las cosas de modo que éste no

continuara extorsionando los pueblos pacíficos, con el acha-

que de sostener a la horda de..... que le acompaña. Causa

O Biblioteca Nacional de España

. MENORIAS DE LA GUBIRA DE RENORNA — 6

lástima ver el estado que presenta esta bonita población,

y es de extrañarse que aún continñien fieles a la causa cons-

titucional, cuando a cada rato se ven saqueadas por patrio.

tas como Pueblita, Coronado, Pinzón, Ruiz con el pudre

Rangel, y otros eriminales menos encumbrados—Entiendo

«me Huerta está my disgustado con la conducta vandúlica

del tal Pueblita, aunque el Sr. Fruerta, también tiene mueha

culpa por haber autorizado a tan semejantes hombres que

vengan a hostilizar a los pueblos amigos de un Estado vecino.

Todos estos pneblos ven al tal Pueblita, como el peor a7o-

te que les puede caer, y ha llevado sus extorsiones a tal grado,

que no teniendo yu los vecinos qué quitarles les han cogido

sus cordos y bueyes y les han enviado a otras poblaciones de

Michoacán para realizarlos.—Todo esto ha mortificado en

alto grado al Sr. Berduzco, quien está haciendo los mayores

esfuerzos para contener tanto abuso y tanto erimen.—Los

que rodean al tal Pueblita se expresan de una manera muy

dura de Huerta.

Día 16—Salió Pueblita de Salvatierra, con xm ehmsma,

y el St. Berduzco con los que le acompañamos hicimos jor-

nada a Maravatío.— El Sr. Berduzco, escribió a Aranda

(Pueblita Segundo), para que desistiera de la ¡dea de ir

a los pueblos del Rineón, pues suponemos que su único ob-

jeto ex el de extorsionarlos.—Se les pusieron comnnicacio.

nes a Degollado, y Aranda, informando al primero de lo

que pasaba y pidiéndole algunas armas—El Lie. D. Fran-

ciseo Guliza va a Morelia para explicarle a los Sres. Dego-

Nado y Huerta, el estado que las cosas gmirdan en esta parto

de la República.—El arrendatario de esta hacienda, que es

muy liberal, se queja de las extorsiones de Pneblita y de las

de otros.—Mueba falta hacen en México, las enerdas de cá-

Tamo y las horcas.

Día 17.—En Moroleón.—Cerea de este bonito pueblo, está

el no menos bonito Tlamado “Ta Congregación de Urianga-

O Biblioteca Nacional de España

E DIARIO DEL CORONEL VALDES —_—

to” Al llamarme la atención la buena conducta en lo ge-

neral de los buenos vecinos de aquí, me dijeron que no había

más que un cura o padre. Es de notarse en todo México,

que la inmoralidad y el crimen guardan una justa propor

ción con el número de padres y frailes en cada una de sus

poblaciones.

Dix 18—En Moroleón.—Bl Sr. Berduzco pnso ana carta

muy enérgica al Sr. Degollado, rechazando con justa indig-

vación, el cargo que éste le hace de haber cansado la sepa-

ración de las fuerzas de Zacatecas, del ejército federal. Se

le puso oficio al Sr. Huerta, poniendo en su conocimiento la

conducta atroz de Pueblita y los suyos.—La fama de este

Pueblita por estos pueblos es tan mala como la de Coronado

en Guadalajara, y todos los puntos que ha legado a tocar.

No es D. Santos Degollado, el que los enfrenará—Llegn

vou algunos oficiales de Morelia, y Ttuiz está de vuelta en

este Estado, según dicen, con antorización del Sr. Huerta,

para levantar fuerzas. TA condueta de Huerta, es muy re-

prochable, pero uo es el Sr. Berduzco, el que quietamente

Te tnlerará sus abusos.

Dis 19.—En Moroleón.—Vino ma numerosa comitiva de

naturales de la Congregación de Uriangato, a saldar al

Sr. Berduzco, y a recordarle sus quejas contra los usurpa.

dores de sus tierras y derechos. Los malvados contra quie-

nes se quejan, pertenecen a esa horda de criminales que con

asombrosa andacia hablan de “Dios y Ley”—Dios y Or-

den”—“Dios y Garantías” cte,, ete—i¡¡Malvados!!! me-

¿nen a Dios que el pueblo no alcance a comprender la mag-

uitnd de los agravios que V.V. diariamente le infieren,

porque entonces tendremos un bautismo de sangre, digno

de vuestros crímenes.—Lilego con unos 65 infantes y 40 cu-

vallos —Nada definitivo sabemos de México, Guadalajara y

San Luis,

O Biblioteca Nacional de España

MEMORIAS DE LA GUENRA DD REFORMA "MT

Día 20.—En Moroleón.—E» la mañana se le presentó otra

numerosa comisión de indígenas al Sr. Berduzco, y acom-

pañados de sus autoridades ofrecieron sus servicios con un

entusiasmo que llamó la atención. Todos los naturales de

estos pueblos son acérrimos partidarios de la federación, y

por cierto la clase de la sociedad en México más digna de

aprecio y respeto.—En la noche, el Sr. Berduzco se reunió a

los jefes de las fuerzas para arreglar el plan de operacio-

nes, y se compró alguna pólvora para elaborar parque: —Se

escribió a D. Ignacio Alvarez.—El Sr. Berduzco, en la tarde

pasó a la Congregación de Uriangato a visitar a los de aquel

pueblo que de nuevo protestaron su lealtad a la causa conse

titucional.

Dia 21—En Moroleón—Vino otra comisión de indíge-

nas a ver al Sr. Berduzco, y a ofrecer sus servicios en favor

de la cansa constitucional y contra sus opresores, las clases

privileziadas.—Fl Sr. Degollado, con fecha de ayer, en Mo-

relia, resuelve que las bueyes, cerdos y otras cosas quitadas

a varios hacendudos de estos pueblos por Pueblita, Aranda

y otros de sus subordinados, sean devueltos a sus dueños.

Previene que para que los tales jefes se proporcionen reeut-

sos, cuenten para ello con el Sr. Berduzco, quien es el único

que tiene facultad legal para cllo—El Sr. Berduzco, me

nombró Mayor General de las fuerzas que se están organi-

zando en este Estado—Reeibimos parte del incendio del

parque de los mochos en el Palacio de Guadalajara y otras

300 personas más.

Día 22.—En Moroleón —Salió Zaragoza a explorar por Gua

najuato, la Luz, Cerro Gordo, ete—Se afirma que San Tais

ha sido ocupado por nuestros hermanos de la frontera. Si

esto es así, el mundo político en la moderna Habilonia pron-

to cambiará de aspecto—Tomé algunas providencias para

la organización de la fuerza.—El enemigo de paso por Sala-

manea echó wa fuerte leva para aumentar sus fuerzas,

O Biblioteca Nacional de España

_—e DIARIO DRL CORONEL YALDRG

Día 28.—En Moroleón.—Todo lo sabido confirma las no-

ticias de que el peladito Miramón, seguido de las más de

sus Merzas ha pasado por Querétaro para México—Se re-

cibió correo de Morelia, y D. Santos le pone al Sr. Berduzco

una carta en contestación a la que éste le dirigió con fecha

18, y sm contenido revela el carácter enconoso del Sr. Dego:

Nado—D. Santitos es hombre que tiene toda la música aden-

tro.—En la tarde me ocupé en Ja reorganización de la fuerza,

y nguardamos los acontecimientos para movernos.

Día 24.—En Moroleón.—Nada de nuevo, y ahora se asegura

que el Coronel Miramón, hermano del peladito, marcha so-

bre Zacatecas con una fuerza respetable—Tisto bien se pue

de dudar.

Dis 25—En el Valle—Esta es una hermosísima pobla-

ción en el riquísimo Valle de Santiago, y cnanto uno ve indi-

ca abundancia.—Nada de nuevo, y por falta de armas nada

de importancia se emprende.

Dis 26.—En la hermosa Villa del Valle de Santingo—

Son las 93 de la noche, y acabo de dar orden para que ensi-

lex la eaballería y todos estén listos para ponernos en mar-

cha a las 104.—La noche está serena y fría, y la quietud de

la población no indica el movimiento que se prepara.—Sin

parque vamos a emprender una operación que quizá fraca-

sará por falta de mmniciones. Con los lanceros xolos, nada

de provecho se puede hacer.

Día 27.—Después de andar toña la noche, amanecimos a

tiro de cañón de la población rebelde de Pueblo Nuevo, cu-

vos vecinos están bien fortificados y armados.—Antes de lle

gar nosotros, habían tocado alarma con las campanas, y se

habían colocado eon sus armas en la torre y azoteas de la

iglesia que está bien parapetada.—Cuando uno de los AL

ealdes salió a hablarme, me aseguró que pronto vendría con

O Biblioteca Nacional de España

_—_ MENORIAS DE LA QUENRA DE REFORMA — MO

el permiso para que entráramos, pero antes de que esto su-

cediera, el Sr. Reynoso comisionado del señor Gobernador,

entró en conferencias con el cura (sic), y otros que pronto

vieron que no atacaríamos aun cuando no nos permitieran la

entrada. Esta conferencia echó todo a perder, y para acabar

de enfriar la cosa, llegó un correo de Moroleón, con la noti-

cin de que 400 cahallos del enemigo habían entrado a Salva-

tierra, además de esto, se temía que recibieran auxilio de Tra-

punto que queda a 5 leguas de Pueblo Nuevo, y todo esto

con la falta de parque nos resolvió a retirarnos, annque los

pícaros del pueblo nos provocaron con algunos tiros—En el

camino el St. Berduzco, se cortó para ir a Pantoja, en cuyo

punto podía estar al tanto de los movimientos del enemigo.

—Salimos para Pantoja, aunque muy desvelados y maltrata-

dos, con la marcha forzada de anoche.

Día 28.—Mabiendo pernoetado en Pantoja, hicimos jor-

nada a Guanímaro a donde el Sr. Berduzo se había ade.

Jantado desde anoche. Antes de salir se nos incorporó Bravo,

con mos euantos que lo acompañan.—Nuestros movimientos

dependen de las circunstancias, y podemos decir que de día

y de noche estamos con el pie en el estribo.

Dia 29.—En Guanfmaro.—Se escribe de algunos puntos

que el Cormel Miramón, hermano del peladito, ha sido de-

rrotado por los del Norte—Se escribe también que el cne-

migo trata de invadir al Estado de Michoaeán.—Tal es mes-

fra situación que abeolutamente nada de cierto podemos

saber.

Día 30.—En el raneho del Moro.—El Sr. Berduzco se se-

paró de la fuerza en Guanímaro, con el objeto de curarse

y de reunir la gente de Bravo—En lugar de 400 que nos

escribieron que habían entrado a Salvatierra, no eran sino

unos 90 y tantos hombres, que pronto se reliraron.—Reyno-

so, como comisionado del señor Gohernador, nos acompaña

con el objeto de sacar recursos del Valle de Santiago.

O Biblioteca Nacional de España

EA DIARIO DEL CONONEL VALDES

Día 31—En Moroleón.—Se asegura que Rojas tomó po-

sesión de Colima.—Esta noticia es de la mayor importancia

pora los defensores de la causa constitucional.

Fenrero 1%—En Moroleón.—Se asegura que los fronteri-

z0s ocuparon a San Luis, y que amenazan a Guanajuato.—

Se corre la voz de que en esta última ciudad tratan de pro.

clamar a Manuel Doblado, Gobernador del Estado—La au

sencia del Sr. Berduzco, no deja de causarnos algún mal,

pero pronto se pondrá el remedio con su regreso.

Dra 2.—En Moroleón, la ausencia del Sr. Berduzco causa

bastantes disgustos, y hoy le escribí para que cuanto antes

se venga—Nada de muevo—Salió Zacarías para Puruán-

diro, a ver al Sr. Berduzco.

Dia 3—En Moroleón.—Se pasó revista de Comisario—

Me escribió de Puruándiro el señor Gobernador Tierduzco,

y dice que estando ya aliviado, pronto estará a nuestro a:

do—Se dice que el Tunes de esta semana salía el indio Me-

¡ía de Querétaro, sobre Morelia, y hoy se asegura, que Inies

tra y Valle, con 2,000 hombres, han salido para Guanajuato,

de Morelia.—El harajero Zuloaga, ha sido repuesto por el

peladito Miramón, en la silla presidencial de la ciudad de

México, reconociendo de nuevo al plan traidor de Tacubaya.

Algún día tendremos cáñamo.

Dia 4—En Moroleón.—Nada de muevo, y perdiendo el

tiempo.—Me vino a visitar esta noche el “padre Rangel,”

hombre bastante notable en este Estado como jefe revolu-

cionario.

Día 5.—En el Valle de Santiago—Al llegar supimos que

el cuemigo bajo las órdenes de Villamera, pasó a una le-

gua de esta población ayer, con unos 200 hombres tomando

el rumbo de Valtierra, a 4 leguas de este punto.—En el acto

de Negar, dicté las órdenes necesarias para que por dife.

O Biblioteca Nacional de España

_ MEMORIAS DE LA CUBRRA DE REFORMA 1

rentes caminos salieran exploradores y me trajeron noticias

del enemigo.—El Sr. Reynoso, antorizado por el Sr. Ber-

duzco, para sacar recursos en esta plaza, está celebrando

una conferencia con muehos partienlares con cl fin de agen-

ciar los reenrsos necesarios.—Ya veremos lo que resnltará

de tanta charla.

Dia 6.—En Valle de Santiago.—Todo el día recibiendo

noticias del enemigo, que bajo las órdenes de un tal Felipe

Villanueva ha colgado y fusilado ayer y hoy a varios libera-

les. A las 11 del día de esta mañana, salió de Salamanca

y leva el camino de Celaya. En la tarde lo aguardaban en

los Amoles que está a 5 leguas de aquí. — Si tuviéramos

parque, desde anoche me hubiera yo puesto en marcha y le

hubiera ya dado un buen susto—Esta tarde se myó mi asie-

tente Vicente Alva, de Guanímaro, robándose mi silla, fre-

no, maletas y uno de mis mejores caballos.—Despaché nu

extraordinario a Guanímaro, a las 8 de la noche, para ver

si siquiera se consigue mí caballo—Con la ausencia del

Sr. Berduzco todo se entorpece.—Hoy se han cometido va-

ríos robos en despoblado cerca de esta Villa, al mismo tiem-

po que me ponen tanta cabeza a cada momento con los cuen

tos que me traen del enemigo.

Dia 7.—En Valle de Suntiago.—Esta noche llegaron dos

piquetes de infantería y caballería, y la falta de armas nos

hace perder tiempo—Mañana nos movemos sobre Salaman-

ca y veremos sí con esto se mejora la situación.—En lugar

de $15,000 0 $20,000 que se pensaba haber sacado, a duras

penas nos han dado $500 que 20 son suficientes para cubrir

el presupuesto de tres días.

Día En Valle de Santiago.—Como a las 5 de la tarde,

el grito en el cuerpo de guardia de “el enemigo, a las ar-

mas,” me indicó el alboroto que reinaba en la plaza —Pron-

to monté a caballo y ocurrí a los cuarteles, encontrándome

O Biblioteca Nacional de España

2 DIARIO DEL CORONEL VALDES —

con la infantería y caballería toda lista y con ganas de salir

al encuentro. El elarín de órdenes me seguía, y me entusias

mé al notar que con mí presencia toda la fuerza se reanima-

ba.—Tas tiendas se cerraron y un gentío inmenso se reunió

en la plaza eno de curiosidad y alarma.— Pronto despa-

ché hombres de confianza bien montados, por el camino que

me habían dicho que el enemigo traía y poeo después me

trajeron la noticia de que no venía tal cnemigo.—Acabo de

recibir noticia del enemigo, y me aseguran que está esta no-

che en Amoles a 5 leguas de esta población.—Se asegura

mucho que Francisco Hernández y Manuel Albarrán con

36 de los nuestros entraron hoy a Salamanca e hicieron a

los de esa población darles $1,000.—Salieron hoy Mendoza,

el pagador; González el nposentador y Zamarripa el forra-

gista—Muehos hay que cuando el peligro amenaza, les so-

Iran pretextos para ansentarse—La fuerza toda duerme

sobre las armas y en caso de un encuentro de armas des

de ahora veo que todos se atienen a lo que yo digo y dis-

pongo —Haremos por cooservar la buena opinión de que

disfruto entre ellos como hombre de armas.

Día 9.—A las tres de la mañana salimos del Valle de San-

tiago, y entre las $ y 9 llegamos a Salamanca. Tan luego

como Negamos, supimos que las ditigencias de México a

Trapuato, estaban para legor, y en el acto dí las órdenes

necesarias para que las detuvieran.—Ta de México, temió

Negar y sólo se cogió a la de Irapuato—Venían algunos pa-

sajeros y entre ellos dos reverendos—Se le impuso un prés-

tamo a la población de $582, y después de recabados salimos

tomando el eamino de Trapunto.—Como a las 6 nos egó

un aviso de la entrada de Villanueva, y que después de col-

gar 2 unos 4 de los nuestros, había tomado el camino de Sa-

lamanea siguiéndonos. Después de algunas consultas, se re

solvió dar una vuelta y pasando el río entrar a Salamanca

entre las 10 y las 11 de la noche, y sorprender a Villanueva

O Biblioteca Nacional de España

MEMORIAS DE LA GUERRA DE REPORMA 19

que se ha hecho algo célebre por los muchos asesinatos que

ya ha cometido. Así se verificó aunque no teníamos el par

que suficiente —Como a las 11 de la noche pasamos el río,

y el Comandante D. Trinidad Chacón tomando el mando

de la infantería entró por una calle y yo con la caballería

por otra. — Sin embargo de la orden que se dió para que

guardaron silencio, tan luego como entramos a la calle. se

comenzó una grita infernal que le sirvió de aviso at ene-

migo.—Pronto se rompieron los fuegos de las azoteas, el

Convento de San Agustín, y los cuarteles enemigos.—El ti-

voteo, los fuegos y los gritos duró como dos horas, y nuestra

caballería que no tenía que atacar a uingín punto, se con

tentada con la gritería de “Viva la Federación”—A los 10-

fantes pronto se les acabó el parque, y habiendo sido muerto

el Comandante Chacón, se resolvió retirarnos por no tener

va los infantes ni un cartucho que quemar —Como a la una

de la mañana comenzamos a retirarnos en bastante desor-

den, y lo que nos favoreció fué que el enemigo temió salir

a seguirnos—Se puso el cadáver de Chacón sobre mi mula

y lo llevamos para Guanímaro para enterrarlo.—La pérdida

«me hemos sufrido consiste en unos 4 muertos y otros tan-

tos heridos,

Día 10.—Después de haber andado toda la noche, Hega-

mos a Guanímaro como a las dos de la tarde—Antes de

Negar se corrió la voz que el enemigo nos había cortado la

retirada y que venía sobre nosotros.—Nos cogió a todos des-

organizados, y por un corto rato la alarma fué terrible amn-

que pronto supimos que era mentira lo que habían dieho—

Eu la tarde fé enterrado Chacón, en la iglesia de Guaní-

maro, y el entierro fué lo mejor que se ha visto en este pun-

to; muchos se han ido a sus casas para salvar a sus fami

Tias, pero pronto estarán otra vez en campaña.

Día 1.Pa Zamurato.—Ya tarde salimos de Guaníma-

10 y pernoctamos en esta hacienda.—Cuando antenoche por

O Biblioteca Nacional de España

_ DIARIO DEL CORONEL VALONS

falta de parque nos retiramos de Salamanca, la mayor parte

del enemigo se había fugado, y Villauueva, llegó ayer a Ce-

laya con unos cuantos que le acompañaron, ¡Habíamos ga

nado y no lo supimos hasta hoy!—Anoche legó el Coronel

Bravo y hoy le entregué el mando de la fuerza.—Iniestra ha

entrado a este Estado con alguna fuerza, trayendo faculta

des omnímodas que le dió el Sr. Degollado para que haga

cnanto se le antoje—Pobre causa con tan semejantes defen-

sores —Como General en Jefe de este Estado, quiere que to-

das las fuerzas se le incorporen.—Ya veremos—Se fueron

Reynoso, Pantoja y unos 20 para Moroleón y Puruándiro.

Dia 12—En Barajas.— Se le escribió al Sr. Berduzco.

remitiéndole el oficio que Iniestra había puesto a Chacón,

para que éste pusiera la fuerza bajo sus órdenes—La fuerza

se anmentó con unos 14 que estaba remiendo en Cerritos el

Coronel Parra—Se incorporó a la fuerza el Sr. Mendoza,

pagador de ella.

Dra 13.—En Pénjamo y Barajas —En la tarde fuí a Pén.

jamo con el objeto de agenciar recursos, y a poco después

de haber llegado me dieron la noticia que el enemigo estaba

cerca. Puse de avanzada a los que me servían de escolta y

les dí orden para que me dieran aviso en caso de sentir al

enemigo. La fuerza se había quedado cn Barajas distante

2 leguas de Pénjamo. Me acosté, y me había comenzado a

dormir, cuando a todo escape llegó uno a la ventana gri-

tando “mi Mayor, el enemizo, Jevíntese pronto” Así lo

hice y me comencé a vestir mandando que me ensillaran

mi caballo. Di orden para que al aproximarse el enemi-

go, la avanzada se retirara por el camino de Barajas que yo

tomé acompañado de un solo ayudante.—Llegué como a la

una de la mañana a donde estaba la fuerza y me acosté a

dormir pensando en los placeres de la campaña a media

noche.

O Biblioteca Nacional de España

MEMORIAS DN LA GUNADA DE REFORMA o

Dia 14—En el Rodeo, nos encontramos con el señor Go-

bernador que me recibió con Jas mayores muestras de amis.

tad.—La fuerza se aumenta y pronto haremos frente al ene-

migo.

Dia 15—En Moroleón—Tan luego como llegamos se su-

po que el enemigo era en número de 400 a 500 hombres, es-

taba en Salvatierra, y anque hubo una consulta ante el

señor Gobernador y se trató de aguardarlo y ponerle una

emboscada, se abandonó la idea por falta de parque, y se

resolvió abandonar el punto. En el acto di las órdenes nece-

sarias, y a las 11 de la noche u0s movimos hacia Purnándiro

después de haber tomado las precaneiones necesarias para

evitar que se nos sorprendiera.

Dis 16.—En Serrano.—Llegamos como a las 6 de la ma:

Sana, todos muy rendidos con la fatiga y desvelada de ano:

che—Según sabemos ahora, cuanto se nos dijo ayer en Mo-

roleón, salió mentira, aunque el enemigo en efecto, estuvo en

Salvatierra.

Dia 17—Fu Surumato—Antes de amanecer nos movi-

mas de Serrano y tampoco (?) Megnmos a esta hacienda —

En Purvándiro vi a mi muy querida amiga doña Agrípina

Vieytis—El Sr. Berduzco se quedó cn Puruándiro para aca:

berse de curar.—D. Ramón Agnilar, se nos fugó con el con-

sentimiento del oficial pícaro que lo eustodiaba.

Dis 18—En Pénjamo—Llegó Gudea, y se celebró una

junta para nombrar autoridades locales, y ninguno quería

recibir el nombramiento —Continñan los borregos de que el

enemigo se presentará de un momento a otro—He tomado

las precanciones necesarias para evitar una sorpresa.—fe

asegura que los rifleros del Norte están en Tugos.—Quiera

Dios que así sen.

Dia 19.—Tn Pénjamo.—En consecuencia de tanta noticia

alarmante, anoche algunos se xalieron de la población y en-

O Biblioteca Nacional de España

290 DIANIO DEL CORONEL VALOR

tre ellos el pagador D. Román Mendoza.—Poco después de

las ocho algún necio o mal intencionado dió las 3 campa:

nadas que sirven de aviso a la población cuando se aproxi

ma el enemigo, y en el momento se alarmó toda la población.

Pronto salí a la calle, organicé una patrulla y conveneí a

todos que no había motivo de alarma.—Se asegura de una

manera positiva, que los rifleros entraron ayer a León—

También se nos dice que Tujestra se balla en San Pedro Pic-

dra Gorda.

Drs 20.—En Pénjamo —Pasó un extraordinario para los

Sres. Berdnzco y Degollado, anunciando la oenpación de Taa-

gos por los federales con Iniestra, y la de León por los rifle-

vos del Norte—Por falta de recursos hemos permanecido

aquí ayer y hoy.—El horizonte se despeja, y se nos presenta

un porvenir halagieño por ahora.

Dis 21—En Pénjamo.—Hegó D. Tomás de la Rosa, co

misionado por el Sr. Degollado, para portar pliegos a los se-

ñores Gobernadores Ortega y Vidaurri, de Zaentecas y Nue-

vo Teón y Coauila—Se recibió carta del Sr. Teranzco,

avisando que se hallaba en camino para Guanímaro, donde

nos aguardará mañana para continuar nuestros movimien-

tos, según convenga.—BSe le impuso un préstamo forzoso de

$2,000 a la hacienda de Tupuataro.—Falta que den el di-

nero.

Día 22—En Guanímaro.—Al llegar nos encontramos con

el señor Gobernador y aguardamos noticias de León y Lagos

para movernos.

Día 28.—En Guanímaro.—Ayer se retiró Tniestra de León

para Lagos, habiéndose tiroteado su retaguardia con las

avanzadas enemigas—En León sacó $30,000, y se Mevó pre-

so a Ibarelengoytia, conservador rico de aquella ciudad.—

Tos fronterizos están en Aguascalientes, dos jornadas de

Tagos, y de San Luis habían salido 2,000 hombres a atuenr-

O Biblioteca Nacional de España

MEMORIAS DE LA GUERRA DE REFORMA 7

los.—Se dieron de baja a varios oficiales, y para ser Mayor

General de los chinacos se necesita más valor que el de Julio

César y Napoleón.

Dia 21—En Cuitzeo de Abasolo.—Salimos ya tarde de

Guanímaro y llegamos antes de las $.—Nada de nuevo y es

tamos pendientes de noticias para saber lo que debemos

hacer.

Dra 25—En Santa Catarina—Se incorporó Razo con

unos 10 Janceros y nada sabemos de lo que pasa por Jalisco

o Aguascalientes. Pronto recibiremos algo de noticias.

Dia 26—Eu la hermosa población del Valle de Santiugo.

—El Sr. Berduzco y el comisionado Mendoza, se separaron

de nosotros, y hemos venido con el objeto de aumentar nues-

tra fuerza y agenciar recursos—Aquí supimos que el 9 del

corriente los fronterizos derrotaron a Joaquín Miramón,

hermano del peladito, y el 14, Zaragoza estaba en Aguas-

enlientes—El enemigo con 500 caballos está a 5 6 6 legnas

de nosotros, y me acuesto a descansar por el resto de la

moche, si nos dejan—Se agenció algún plomo y se rechutó

alguna gente,

Dis 27.—En Valle de Santiago. —Como a las 2 de la tar-

de se corrió In voz de que el enemigo estaba en el Piteyo, a

3 leguas de aquí.—Hubo su alarma, pero con los explora:

dores que al momento destaqué, pronto supe que era falsa

la noticia.—Se asegura que el foragido Villameva fué de-

rrotado en los Sauces, y que el General Tola, ha sido nom-

trado para substituir a de Licénga en el Gobierno de Gua-

najuato.—De Licéaga se niega a entregar el Gobierno—

Tengan paciencia, pillos y brihones, que pronto se les Negará

su día.

Dia 28—En Purangueo—Antes de desensillar llegó uno

de nuestros oficiales en estado de embriaguez con la alar-

O Biblioteca Nacional de España

128 DIAMIO DEL CORONEL VALOBA

mante noticia de que el enemigo había entrado al Valle, y

quizá habría colgado ya a 3 6 4 de los compañeros que se

habían quedado atrás. El hombre legó asustadísimo a ma-

tacaballo, sin sombrero, siu chaqueta y sin armas. Aunque

la noticia emisó su alarma, se me hizo increíble annque no

de a pie la confirmaba.—Destaqué exploradores y guerrillas

para que se cerciorasen de la noticia, y tomé las medidas ne-

cesarias para el caso de venir el enemigo.—Como a las

11, estando ya acostado, se me dió el aviso de ser falsa la

noticia y la fuerza durmió tranquila el resto de la noche.—

Encontramos a Pedro Enríquez, que en la mañana se había

separado en Surumato del General D. Justo Alvarez, que

substituye a Injestra en el mando de la División que opera

en este Estado.

Marzo 1*—En Guanímaro.—En Parangueo esta mañana

se despachó a la mayor parte de la caballería, con el objeto

de agenciar recursos y traer caballado.—Se asegura que los

federales en número de 3,000 hombres, hostilizan a Gua:

najuato.

Dis 2—En Guanímaro—Llegó el Sr. Berduzco.— Los

Constitucionalistas de nuevo ocupan a León, y con los rifleros

amenazan a Guanajuato desde antier.—Las fuerzas del pue

blo por todas partes ganan terreno, y al último se presentan

codas las probabilidades contra tanto pillo y bribón.

Día 8.—Ya noche se recibió la noticia de la toma de Gui

najuato por las fuerzas Constitucionales.—El enemigo hizo

poca resistencia, y huyó tomando el camino de Querétaro—

Los del Norte amagan a San Luis, y la balanza se inelina

a nuestro favor-—Los vifleros y los de Zaentecas fueron los

que tomaron la plaza de Guanajuato. El indio Mejía, que

venía en su anillo, se volvió de Burras.—Después de llegar

2 Cuitzeo, determinó el Sr. Berduzco enviarme a Guanajua-

to con una comisión cerca del muevo Coronel en Jefe Don

O Biblioteca Nacional de España

MEMORIAS DE LA GUERRA DE REFORMA 12

Justo Alvarez, y veré lo que puedo hacer para contrariar las

intrigas de tanto zaragate que desean colocar al bribón de

Doblado en la silla guhernativa de este Testado, sin embargo

de los actos legales y muy justos del Sr. Berduzco.— Salí

ya metiéndose el sol, y después de caminar unas $ legnas

voy a dormir en esta hacienda de Guadalupe que queda cer-

cn de Trapuato.

Día 4—En Guanajuato —Mucho antes de amanecer en-

sillé y devolví la escolta que me acompañó hasta la hacienda

de Guadalupe. —Llegué a esta capital antes de las 12, y en

Marfil antes de llezar vi a muchos de mis hermanos fronte-

rizos y a otros amigos.—Presenté mis comunicaciones al se-

ñor Alvarez, que no es gran cosa y como a las 6 de Ja tarde

me dió las contestaciones que en el neto remití al Sr. Ter-

duzco.—La ausencia de este señor nos causa daños, y los Do-

bladistas trabajan con empeño por poner a su favorito en

el poder—El papel que Iniestra ha representado en estas

indienas intrigas, revela que es bribón además de cobarde

y picaro.—Hablando esta tarde sobre esto, les eché la viga,

como luezo dicen, a alemnos alucinados que están creyendo

que con impunidad Hevarán adelunte sus miras personales.—

Las fuerzas en esta ciudad se componen de unos 4,500 hom-

bres, y parte de cllas están ya en camino para Irapunto.—

Tus que han quedado saldrán mañana.—Me encontré con

muchos amigos y conocidos—La cosa marcha bien, y quie-

rú Dios, que no se repitan las burradas de Guadalajara.

Dis 5.—En Guanajuato—Llegó esta tarde el señor Go-

bernador Berduzco, y toda la fuerza continuó hoy su mar-

cha sobre Trapuato. El General Alvarez se ha quedado aquí

y saldrá pasado mañana, —D. Santos Degollado le ha da-

do instrueciones que tienen por oljeto la destitución del

Sr. Berduzco, reponiendo a Manuel Dobludo en el puesto de

Gobernador —El presente caso me convenee de que en Don

Santos Degollado no debemos poner confianza, y es preciso

.

O Biblioteca Nacional de España

190 DIARIO DEL CORONEL VALDES

hacerle la guerra al terminar la presente lucha, si no quere-

mos que «e desvirtúe la canxa.—En este infame pastel están

D. José Justo Alvarez, y el gañán Iniestra como instrumen

to del hipócrita Degollado, siento mucho el desengaño que

he Nevado con el Sr. Degollado, y 10 más ejerto es, que mi

lares de mis pobres paisanos, continuarán creyendo que el

tal Degollado ex un patriota desinteresado—Salió Zarago-

za con algunos oficiales del ejército del Norte. -

Dis 6.—En Guanajuato.—Nada de muevo, anque nuebo

se habla de los movimientos del enemigo.—Dicen que han

abandonado la plaza de San Luis, y que el indio Mejía está

fortificándose en Celaya.

Drs T—En Guanajuato —Llegó el Sr. Degollado, y fué

recibido con cohetes, repiques ar vuelo, ete.—Todo esto os de

estampilla. —Entró lu fuerza de que yo soy Mayor General

y veré cómo Ja visto enanto antes.—Los conservadores que

más han perfulicado a nuestros partidarios, se pasean 1i-

bremente, y esto mortifica mucho a los que han sido víeti-

mas de sus persecuciones.

Dia Sn Guanajuato.—Puí nombrado Mayor de esta

Plaza.—En Ta tarde se incendió alguna pólvora en Gra-

maditas y cansó bastante alarma en la eludad— Pronto

monté a caballo y para cuando legué por entre un in-

menso gentío, ya lo habían apagado, — El Coronel Bello

Berduzco, comenzó hoy a funcionar de Clobernador, sin em-

Margo de Luc miserables intrigas que se habían puesto en

pie para evitarlo.—egó la diligencia, y nos trae la noticia

de que el indio Mejía, emprendió su mareha de Celaya para

San Miel, anoche a las 2 en punto.—El Sr. Rerdunco co-

menzará mañana a tomar algunas providencias con el fin

de Mamar a enentas a algunos de los pícaros encumbrados

que tenemos en esta ciudad.

O Biblioteca Nacional de España

MENONIAS DE LA UUENSA DE UECORMA 1

Día 9—En Guanajuato.—Fué nombrado Comandante Mi-

Titur en estu plaza el Coronel D. Tenacio Echegaray. —Di a

reconocer a varios jefes y oficiales, y entre otros al joven

Tenacio Siliceo, hermano del ex-Ministro de Fomento, don

Mannel. Su anciano padre me lo entregó como hijo, y entra

al servicio como ayudante mío—Conoeí al bastante célebre

1). ¡Tosé Vaz, y es hombre por cierto de un carácter personal

muy extraordinario.—Se asegura que 1,500 hombres en San

Las, Ucgaron antenoche a San Pelipe.— Fué arrestado y

merido a la cárcel pública, por orden del señor Gobernador,

D. nacio Fernández, comerciante bastante odiado por o

mucho que antos de ahora ha perseguido a los Tiberales.

Dia 10.—En Guanajuato.—En unas cuantas horas el se-

for Degollado sacó un préstamo forzso de 60: $ 70,000,

cargándoles la mano a Jos conservidores.—Me tocó la des-

agradable oenpución de catear la ensa-del señor Villalobos,

hombre de póxima fama como enemigo del orden constítucio-

nal.—Fl Sr. Degollado con su escolta y Estado Mayor, sal

dirá antes de amanecer mañana, y ya veremos lo que se pueda

hacer para organizar Cuerzas, vestirlas y soeorrerlas.

Di 11.—En Guanajuato—Antes de amanecew salió el

St. Degollado y todo sn acompañamiento, levíndose preso

+ D. Tgnacio Fernández, y dejándonos sin nn peso ni un fu-

«il —La difigencia de esta noche nos trae la noticia de haber

cneontrado a Arteaga con sus fuerzas más alli de Apaseo,

esta mañana, y el resto de mestras fuerzas a las 11 salían

de Celaya paro Querétaro.—Esta noche ocuparía la pla-

70 de Querétaro —Necesitamos trabajar mucho para orga

nizar mmestras Merzas en esta cindud.

Dia 12—En Guanajuato.—El enemigo salió de San Mi-

guel Allende esta mañana a las 9, tomando el camino de

Querétaro —Los de Pueblita y Arteaga después de ocupar

esta última, la evacuaron con el fin de concentrarse y dejar

O Biblioteca Nacional de España

hi DIARIO DEL CORONEL VALDES

al indio Mejía entrar en Querétaro.—La diligencia de Lagos,

hoy de noche (sic), porque la detuvo un tal Washington

que es uno de la chusma de juramentados euando la toma de

Cuadalajara, y que por D. Santos, no fué pasado por las ar-

mas. —Llegó Alvarez; también avanza sobre México y pronto

tendremos noticias de interés.

Día 13—En Guanajuato.—El enemigo descubrió que las

fuerzas que de esta cindad avanzaban sobre Querétaro y

las de Diego Alvarez, por Cuernavaca, obraban en combina-

ción, y por eso ha desocupado las plazas de Guadalajara y

San Luis—Por ahora los nuestros amenazan a la eiudad de

México y pronto sabremos algo de importancia.—Esta tarde

fuí a ver a mi muy noble amiga doña Carolina Siliceo de

Anda, hermana del ex-Ministro D. Manuel Siliceo, y esposa

del muy liberal D. Pedro Anda, ensayador de la Casa de

Moneda de esta ejudad—El Sr. Berduzco y yo, escrihimos

a mi primo Blanco, para que avance sobre esta ciudad y

evite su ocupación por Márquez, que ha salido de Guadala-

jara,

Día 14.—En Guanajuato.—Desde antier nuestras fuerzas

ocuparon a Querétaro, y ayer salieron para México.—El in-

dio Mejía con los suvos no hizo por entrar a Querétaro. y

annque algunos suponen que viene para acá, lo más segu-

ro es que se fué de puso para México.—Nos falta saber si

Márquez, que ya salió de Guadalajara vendrá 0 no u esta

cindud.

Dra 15.—En Guanajuato.—Ahora se sabe que Márquez no

ha salido de Guadalajara, y se corre la voz que el indio Mr

jín ha sido derrotado cerca de Querétaro—Se asegura que

500 riferos han oenpado la Ciénega Grande, perteneciente

e) Marqués de Guadalupe — Rincón Gallardo. — Todo eso

agnardamos noticias de nn momento a otro (sic).

O Biblioteca Nacional de España

MENMONTAS DB LA OUBUIA DB MFORMA 125

Día 16.—En Guanajuato.—Se recibió la noticia de la de-

rrota del indio Mejía y Calleja, entre Querétaro y San Juan

del Río—Aun no sabemos la noticia oficial-—Este hecho de

armas pondrá en apuro al Gobierno de los pícaros en Mé-

xico,

Día 17.—En Guanajuato.—Por la diligencia de esta parte

se confirma la noticia de la derrota del indio Mejía y Ca-

lieja. Este último se metió a la Sierra, y las fuerzas en el

Valle de México, amenazan a la copital—Continuamos or-

ganizando fuerzas.

Dia 18—En Guanajuato.—Se recibió el parte oficial de

la derrota del enemigo en Calemanda, y la retirada del in-

dic Mejía hacia la Magdalena y Tolimán.—En el parte toda

la gloria de la jornada se la dan a nuestros hermanos de

Nuevo León y Conbnila—La fuerza aquí se aumenta, aun-

que no tan rápidamente como es de desenrse—Se asegu-

ra que el peladito Miramón se retiró de Córdoha, y que entre

otros muertos se encuentran los titulados Generales Ruelas

y el bandido gachupín Cobos.—Rojas, también derrotó en

Santa Anita, cerca de Guadalajara, a 500 del enemigo, y

ahoreó al Coronel que los mandaba en Jefe.—El cielo al úl-

timo se compndece de la pobre México.

Dra 19.—En Guanajuato. —Día de Señor San José, y re.

cibiendo noticias de que nuestras fuerzas pernoctaron el 17

en Arroyozareo.—Se dice que los llamados “Supremos Po-

deres” trataban ya de salirse de México y marchar a Pne-

bla.—Se está festejando la vietoria de Calamanda, con nn

“gallo;” que han sacado por las calles muchos de los jóvenes

más entnsiastas de esta eludad.—Las noticias que de México

agnardamos, todas son de interés, y rogamos a Dios, que del

trimifo del pueblo saqnemos algún provecho.

O Biblioteca Nacional de España

Bs DIARIO DEL CORONEL VALDES -

Dia 20.—En Guanajuato —Nada de mevo—Escribí a mis

hermanos a Monterrey y Matamoros—Todos aguardamos

con ansia las noticias de México.

Día 21.—En Guanajuato.—Todo se mandó preparar para

salir de una hora a otra, pues Márquez, con 1,500 hombres

y alguna artillería, salió de Guadalajara para México, y de

paso Negará pasado mañana a Silao que queda a 5 leguas

de esta cindad.—Contamos con cuatro piezas de montaña,

180 infantes y unos 140 chímicos.—Esta cindad es indefen

dible y quizá tenemos que abandonarla por unos cinco 0 seis

días.—Hoy es día de San Benito y los colegiales e esta

cindad están celebrando el día sín embargo de la oposición

del rector local, que es conservador acérrimo—Tos balco-

nes rienmente iluminados y adornados, están llenos de vivas

en verso y prosa al pueblo. a la Tibertad, ete—Muchos nos

acompañarán en caso de que nosutros abandonemos la pla-

7a.—Al entrar yo, y al salir de la sala, me aplandieron ex-

trepitosamente, echándome vivas, al darme el asiento de ho-

nor adornado con el pahellón de Tguala.—Me fueron muy

gratos los vivas de tanto joven ilustrado y Meno de ent

siasmo por la cqusa del pueblo—No puede ser que los enc-

migos de la libertad triunfen, enando tanto joven entusiasta

y de edncación está en tomar parte en los asientos púllicos

de su país (sic).

Dix 22—En Guanajuato—Son las 11 de la noche y aca-

bo de dar la orden para marchar a Ja una de la mañana sobre

Silao.—Queremos colocarnos con tiempo para darle un sus-

to a Márquez en el camino, si de Lagos se resuelve a tomar

este camino para entrar a esta ciudad.—Nos acompaña una

comitiva más numerosa que la que el año pasado nos acom-

pañó de esta misma ciudad a los del ejército del Norte—

Casi todos los colegiales se van con nosotros por no expo:

nerse a ser perseguidos, por sus opiniones más rojas que la

sangre.

O Biblioteca Nacional de España

_MPMORIAS DE LA GUERRA DE NEVORMA 1

Dia 23—Eu Silao-—Después de mua terrible desvelada,

Megamos a esta bonita población como a las 9 de la mañana.

Por la diligencia y el telégrafo, supimos que los traidores

que estaban en Lagos evacuaron la playa por haber sabido

con anticipación que nosotros evnenábamos la plaza de Gua-

vajuato para ir en persecución de ellos—El eriminal Már-

quez regresó a Guadalajara que para esta fecha estará ama-

gada por Rocha y Oguzón.

Dra 24.—En Silao —Los de Trapunto hicieron ayer su mo-

tincito, y hoy se les enviaron 50 enballos y mnos 100 infan

tes para que se aquieten—El haber de esta fuerza saldrá

del bolsillo de los partientares de Guanajuato, para que sean

más enerdos en lo sucesivo—Llegó corren de Zacatecas, con

pliegos para Degollado y Huerta—El Sr. Ortega, Goberna

dor de Zaentecas, escribe al St. Berduzeo, que continúa Ta

organización de fuerzas, y que el día 13, Blanco, con 1,200

rifleros estaba en el Saltillo, en route, para San Luis—Zaa-

ma pronto saldría de Monterrey—Nada de México 0 Gua-

dalajara.

Dia 25—En Irapuato.—Anoche, al llegar la fuerza que

se onvió de Silao, hubo sus balazos, pues al entrar como a

las $ de la noehe, les dieron el quién vive a los serenos y és

tos contestaron “Ta religión”—Fl resultado fué que los

nuestros les hicieron fuego, y les mataron 4, siendo uno de

ellos el caho de serenos —sta es nna de las poblaciones le-

víticas del Estado y es preciso escarmentarla para ejemplo

de las demás —Tan luego como llegamos, el Sr. Berduzco

me dió orden para que mandara remitir a los cuarteles a

todos los que se sospechara ser partícipes del motín de ano-

che, y los cuarteles esta noche están llenos de gente dete-

nida.—Muehos no tendrán enlpa, pero los más merecerán

algún enstigo.—Nada de México, por la diligencia de esta

tarde, y dicen que todos los reaccionarios se han vuelto a

Guanajuato.

O Biblioteca Nacional de España

195 DIARIO DEL CORONEL VALDES

Día 26.—Ev Trapuato—La diligencia llegó de Querétaro

sin traer noticias de México.—Con nuestra salida de Gua-

najuato, algunos de los cabecillas remccionarios hun regre-

sado a aquella capital—El Sr. Berduzco dejará de goarni-

ción en esta plaza, 30 dragones y 50 infantes, cuyo haber lo

cubrirán los vecinos de esta Villa, como castigo que se les

impone por revoltosos y díscolos los más de ellos.

Dia 27.—En Trapuato—Ayer, el hombre Márquez legó

4 Lagos, y es casi seguro que de paso Negará a Guanajuato,

para despedirse con darle una robada.—Ya veré si le doy

un susto a su retaguardia aunque nuestra fuerza numérica:

mente es muy inferior a la que él trae—A las 2 de la maña-

na nos moveremos, dejando a unos 50 dragones para que nos

observen al enemigo.—Llegaron esta mañana de Guanajuato

Arámburo y Serrano, en comisión, cerea del Sr. Berduzco,

pues los cabecillas reuccionarios han querido formar su bo-

lita en la capital —El Gobernador al último tendrá que dar-

les un susto—Víspera de la ocupación de Guanajuato.

Dia 28.—En Pueblo Nuevo.—aA las 3 de la mañana, sali-

mos de Irapuato, dejando en esta población a unos 50 hom.

bres del escuadrón Licéaga, para eonservar el orden.—Los

del pueblo atenidos a sus fortificaciones, no se quisieroo

rendir, y a las 9 se comenzaron los fuegos que duraron hasta

las 4 de la tarde, que la iglesia en que el enemigo se defen-

día, fué tomada por asalto—Fué un día de horror y sangre,

y quebraba el corazón ver tantos muertos, al mismo tiempo

que todas las casas en las inmediaciones de Ja iglesia habían

sido incendiadas—Uno de los cabecillas, Mejía, fué muerto,

y los demás en número de ciento y tantos, cayeron prisio-

neros, incluso el cura Calderón, que es más culpahle que to-

dos ellos—Los demás serán metidos a las filas, ya que tan-

+0 les gnsta la pólvora

Dra 29.—En Valle de Santiago.—Ayer, con unos 200 ca-

ballos entró a Guanajuato el ladrón Márquez, y el grueso de

O Biblioteca Nacional de España

MEMORIAS DE LA QURRRA DE REORNA 17

su chusma en número de 800 infantes con 9 piezas, llegaron

de Silao a Trapuato.—Llegó extraordinario de México, y pa

só para Agnascalientes, Zacntecas y Monterrey. — Hace 5

días que los nuestros habían tomado a Chapultepec y Tacu-

baya, y sólo azuarduban el parque de Morelia para atacar

en forma—Es hora en que probablemente la cosa se habrá

decidido en México.

DíA 30.--En Parangueo.—El enemigo en número de mos

700 y pico de hombres, llegó hoy a Salamanca como a las

12 del día, y en la tarde destacamos unos 60 caballos del Va-

lle, para hostiliznlo—De paso para Trapuato, mandó col-

gar Márquez, a mn joven que había pertenecido a las fuerzas

federales—De Pueblo Nuevo, se separó el Sr. Berduzco de

nosotros, y se fé a Cuitzeo con parte de la caballería. Desde

Mnego se han sentido hastantes males con su separación.

Dia 31—Ev Santa Catarina—El enemigo salió esta ma-

fama de Salamanca, y en Valtierrilla, la caballería que ayer

destacamos del Valle, atacó sn retaguardia, metiéndolos en

tal cnidado, que se han vuelto a Salamanen—Si no fuera

que en el sangriento ataque de Pueblo Nuevo nos quedamos

sin parque, mañana deberíamos hacer un movimiento, amena-

zándolos sin embargo de la inmensa ventaja de sus artille

rías.—Foy se pusieron en libertad un nímero considerable

«le los prisimeros de Pueblo Nuevo, y los demás se incarpo-

raron al batallón Allende,

Ann 1%.—En Trapunto—Como e les 12 salimos de San-

(a Catarina, y a poco andar encontramos a Medina, con

los 59 cahallos que destacamos del Valle, para hostilizar al

enemigo—Lograron quitarle algunas armas y caballos, ade-

más de In señora del Administrador de Salamanca, y otras

que el ladrón sanguinario Márquez lleva presas.—Llegó to-

do lo perteneciente al Gobierno de Guanajuato menos el se-

Tor Berduzco.

O Biblioteca Nacional de España

1 DIARIO DEL COLONEL VALUES

Dra 12—En Trapuato.—Dexpués de dados ev la tarde el

primero y segundo toque de marcha, se tocó fagina a las 4,

y se despacharon dos partidas de caballería para interceptar

a algunos de los sediciosos que en Guanajuato quisieron ha-

cer sus movimientos de costumbre.

Dix 3.—En Guanajuato—Otra vez en el Palacio de Gua

najuato—El Sr. Berduzco fné muy bien recibido—Enho

su banquete, serenatas, zallos, etc.—Se confirmó la toma de

San Tuis por Degollado (D. Eulalio) y Zayas.—Se corrió

el borrego esta noche de que Varela, jefe de unos semi-ban-

didos conocidos con el nombre de fósforos, estaba a las go-

teras de esta cindad.—Envié exploradores, y salió mentira.

—Se afirma que el peladito Miramón, regresó a México. y

que ha fusilado a Parra, a Doblado, a Ovando, a Aleérroca,

y m0 sé 2 quiénes otros; será sf. pero no lo creo

Dia 4—En Guanajuato—Arresté en persona y llevé a la

cárcel pública, por motinista y escandaloso, al Padre Ie-

taneourt, a quien antes de meter a la cárcel hice que se des.

pojara del cuello y demás vestimeas que indicahan su pro-

fesión de clérigo —No tenemos ningunas noticias, y todos

desean saber lo que habrá pasado en México.

Dra 5.—En Guanajuato. —Por la diligencia de esta tarde

sabemos que las operaciones sobre México han comenzado,

y que las fuerzas enemigas que habían salido sobre Vera-

cruz, quedan cortadas sin poder auxiliar a sus hermanos de

traición en México—Pnse oficio al Jefe Político para que

pusiera a disposición del Juez competente al Tr. Betancourt,

por ebrio y escandaloso —Se pasú revista de Comisario

Dia 6.—En Guanajuato—El cura de esta ciudad remitirá

a Moreliu, por conducto del Gobernador de este Estado, al

padre Betancourt, castigándolo de esta manera, siendo la an-

toridad civil pueda ser aensada de que persiga al clero, (sic,)

La diligeneia nos trae la noticia de que en México, los fue

O Biblioteca Nacional de España

MEMORIAS DE LA GUERRA DE REFORMA .

gos habían sido muy formidables el 2 y el 3 del corriente, y

que los de la plaza habían pedido parlamento con el objeto

de Iecantar sus muertos y heridos —Cuento my bonito pa-

ra bobos y niñas eándidas.

Día 7.—En Guanejuato—Se confirmó la noticia de la

ocupación de San Luís por Eulalio Degollado y Guadalupe

García. —Ortega, el Gobernador de Zacatecas, marcha para

México o Guadalajara con 1,500 hombres.—El enemigo que

evacuó la plaza de San Luis, legó ayer a San Felipe.—El

peladito Miramón, hizo por fugarse por Tuxpan, pero lo re-

ehazaron, y recibimos el parte de sn derrota

Día $—En Guanajuato—Llegó la diligencia de Queré-

taro, y nada se sabe de México—Todos agnardamos noticias

de México con las mayores ansias.

Dis 9—En Guanajuato.—El enemigo que evacnó la plaza

de San Tis, se fué de paso para San Miguel, aunque no fal-

16 quien de los conservadores los enviaran a amar para que

entraran a esta plaza. — Nada de México, y los borregos

que corren en contra y a favor de nosotros, son muehísimos

Llegaron Echeverría, González y Antillón, en comisión de

Fuerta—No he sabido cuál «ea la comisión que trae cerca

del Sr. Berduzco,

Día 10.—En Guanajuato.—El resultado de la conferencia

del Gobernador con los comisionados de Morelia fué, que

se me nombrara Jefe Político y Comandante Militar de Ira-

puato.—Según avisos dados reservadísimamento, los espa-

ñoles Pérez Gómez, Luis López y otros, han salido de Maza-

tlán, y por el camino llamado de las Iaciendas, saldrán por

Trapuato.—La presa sería nuy importante, y ya veremos si

se logra la aprehensión de estos criminales —Ayer fué dado

a reconocer como Jefe de las Armas de esta plaza, en la an

sencia de Teodoro Bravo, Mariano Guerrero, del batallón

Allende.—Eoy, por salir 70 mañana, se dió a reconocer co-

O Biblioteca Nacional de España

10 DIARIO DEL CORONEL VALDES N

mo Mayor de Plaza, al Coronel Calixto Bravo—A la madru-

gado quiero salir para habérnoslas con los semifanáticos y

levíticos irapuatenses.

Dia 11.—En Irapuato—Legué como a las 12 con uno de

mis ayudantes, mi asistente y mi clarín de órdenes. — Don

Jesíts Magallanes, me entregó en el acto la Jefatura, y Ba-

viga, la pliza—Tan Juego como Negné, mandé cubrir el

camino de lus Haciendas, con el fin de ver si alguno de los

pollos gordos que me han encargado, caen en nnestras manos.

Dis 12—En Trapuato.—Pasé el día en disponer guberna-

tivamente de algunos negocios, y en dar órdenes para que

cuanto antes se hicieran efectivas algunas providencias del

Gobierno.—Pasó la diligencia de Querétaro, sin noticias de

México—Nada hasta ahora he sabido de ninguno de los po-

Nuelos que tanto se me ban encargado y que vienen de Ma-

zatlán.—Con el gachupín Pérez Gómez que caiga en mis

manos me contento.

Dra 13—En Trapuato.—Gasté el día en el arreglo de co-

sas del Municipio.—Llegó de Guanajuato Joaquín Lama, y

m: trajo carta del Sr. Berduzco, quien me dice que consulte

a Tama, tocante a cosas de la población. —El Gobernador

Ortegn y sus zacatecanos pernoctaron esta noche en León.—

De México, nada se sabe—Compré algunas armas de muni-

ción para los 50 hombres de infantería que quiero organizar

para el resenardo de la población

Día 14—En Jrapuato.—La población está bastante alar-

meda con la notieia de que el enemigo en Celaya avanza so-

bre esta Villa —El Gobernador Berduzco me escribe de que

en Irapuato circulaba la noticia de que Degollado había si-

do derrotado en México —Esta noche durmieron los de Za-

entecas en Silao, probablemente y apenas puedo ercer que

el enemigo que se halla en Celaya venga para ací—Lo más

O Biblioteca Nacional de España

MEMORIAS DE LA OUENIA DE RESORMA 1

del día lo gustó en el arreglo de tantos negocios que tienen

relación con los intereses de la población.

Dis 15—En Trapuato—Se recibió del Gobierno del Es

tado un decreto imponiendo un subsidio extraordinario de

6 al millar sobre finens rísticas y urbanas para sostener la

gnerra suscitada por la reacción-—Medina se fué para Pie-

dra Gorda, y está haciendo mucha falta en Salamanca, en

cnya vecindad se están cometiendo robos diariamente—Los

de Celaya, se han ido para Querétaro y se corre la voz de

que parte de los que la componían se pronunciaron, y que

otras «e desbandaron.

Dia 16.—En Trapnato.—El Gobernador Berduzco me es-

eribió aprobando todo cuanto vo había hecho como Subpre-

ferto y Comandante Militar de este Partido.—La diligencia

mada nos trajo de México.—Ve eseríben que Pedro Hinojo.

sa llegó a Guanajuato, y hoy le escribí diciéndole que me

venga a ver-—Guadalnpe García leva el camino de Queré-

taro por San Miguel el Grande—El Gobernador Ortega pa-

sará probablemente por aquí mañana o pasado,

Dia 17—bn Trapuato. — El Gobernador Ortega legó a

Guanajuato con 2,000 y pico de hombres—La noticia de la

derrota de Degollado «alió fulsa—Llegó Medina, de Teón,

con en escuadrón y va para Salamanca, donde tanta falta

está haciendo.

Dix 18—En Trapnato—Esta tarde Hegaron 3 de las fuer-

21% federales que estaban en México, y me aseguran que fue

von derrotados completamente en Chapultepec y Tacubaya.

Tíasta aliora nada de ejerto se sabv.—Ta diligencia en

contró en el camino de Querétaro a las uvanzadas de Taman-

lipas y San Tais—Medina, con xus fuerzas se pasó esta

tarde hasta Salamanea—Me aseguran que Puncho Portu

gal ha sido pasado por las armas en México.

O Biblioteca Nacional de España

uz DIARIO DEL CORONEL VALDES _——

Día 19.—En Trapuato.—Liegó el Gobernador Ortega, con

timos 1,500 hombres de Zacatecas —Según todos dicen, toda

la artillería se perdió en México y muehísimos se quejan

de la ineptitud de D. Santos Degollado—Mueho temo que

nada definitivo se haga mientras este señor continúe man-

dando en Jefe las fuerzas federalos.—Los del Sur, dicen que

amedaron: malísimamente.—Sin embargo de la retirada de

México ns sobra gente para hacerle frente a la reneción y

para vencerla también—aA Paneho Portugal 10 sacaron del

hospital donde estaa curando enfermos y lo pasaron por

las armas bárbaros!

Día 20.—En Trapueto —Los periódicos de México han en-

tornado hinmos de ventura y de placer por la retirada de

mmestras fuerzas de Tacubaya, pero my pronto los haremos

cambiar de tono—En la junta de jefes y oficiales que se ce-

lebró exta tarde, el Gobernador Ortega, habló extensamente

sabre la situación, y el fatal resultado de las Mamadas me-

didas de Tenidad observadas por los que estaban al frente de

la came Constitucional. Se declaró enemigo de semejante

política, y está por que acabemos con los que son cl sostén

de da reacción —Dijo que era preciso hacorle presente al se-

Tor Degollado, que no se tolerarían los nombramientos que

acostumbra hacer de jefes militares para que manden a las

meras del pueblo—El hombre es rojo lezítimo y está en

favor de un bautismo de sangre para lograr las reformas que

tantas veces se han prometido al pueblo.—Además de Pan-

cho Portugal, el Dr. Duval y xn ayudante Roberto, de Mon-

terrey, fueron sucados del hospital y pasados por las armas.

—Se resolvió esta tarde en la junta, que pasado mañana

avanzaríon a Celaya todas las fuerzas y formarían allá su

enartol general, ocupando a Querétaro, al mismo tiempo—

Esto se hará antes de 8 días, y ¿qué dirán entonces los de

México?—Escribt a Pedro inojosa, avisándole que Excha-

caray había sido nombrado Comandante General de Guana-

O Biblioteca Nacional de España

MEMORIAS DE LA SERIA DE REFORMA 10

juato. Covas de D. Santitos, pero que no se le cumplirán sus

deseos.—Nuda de mochos para mandar a nuestros guardias

nucionales—Llegaron Zaragoza y Quiroga cor nnos 1,000

y tantos rifleros, y los mandé recibir con repiques a vuelo,

ere—Les facilité salitre y plomo a los Sres. González y

Pehagaray, comisionados del Sr. Huerta, para que lo Heven

a Morelia, y xe continñe la elaboración de parque.

Dis 21.—En trapuato.—Escribí a mis hermanos, el Club

de los Rojos y al Dr. Alears—Por orden del Gobernador

Ortega, se echó una fuerte Tera y casi me han vuelto loco las

mujeres, pidiéndome a_sus hijos y maridos—Esto re ha he-

cho como castigo a la población—Se recibió de oficio la

eupación de Colima, (sie.) el día 14 del corriente por tas

fuerzas de Ogazón y Rocha-—Las fuerzas de Zacatecas y los

rifieros de muevo saldrán mañana xobre Celaya y Querótaro.

Día 22—En Trapuato.—Legó Guadalnpe Delgado, de ex-

trnordinario de San Luis, Zuazua, con $00 rifleros, llegó a

aquella plaza antier—Guadalupe García, Megó el mismo

día, e iba de retirada ereyendo que con la retirada de Ta-

cubaya todo se había perdido —Los dos alegan que por falta

Ae recurs no se podrán mover-—El Gobernador Ortega se

fué a Guanajuato en la diligencia de hoy con el in de acti.

var las medidas que ya se han tomado para que no se pa-

ralicen las operaciones por falta de dinero-—Todo se arre.

elará con el Se. Berduzco—Los vifleros con Zaragoza y

Quiroga, salieron esta mañana quen Celaya.—El Ines o

martes de la semana que entra, el indio Mejía Megará a

Querétaro, de México, con wnos 1,200 hombres, y según él

dice, son soldados militares de las tres armas, de infuntería,

caballería y artillería —Con éstos y los que va están en

Querétaro, remirá unos 2,000 hombres y 20 piezas de arti-

Mería.—Con semejante fuerza nada nos hará—El asesino

Márquez, con 2,500 hombres salió de México para Morelia

e irá a Guadalajara. Allá lo agnardarán Rocha, Ogazón y

O Biblioteca Nacional de España

"“_ DIARIO DEL CORONEL VALDES _

Pesqueira.—Vélez, también salió por el camino de Veracruz,

y por ese rumbo tendrá que vérselas con Ampudia y Troeonis.

Los asesinatos por mayor perpetrados en México, después

de la retirada de los nuestros, han causado una dolorosa

sensación aun entre los mismos conservadores. — Al último

abriremos los ojos—La infantería de Zaentecas nún está

aquí y mañana o pasado, seguirá el movimiento de los rifle-

rox—Salió extruordinario para Monterrey.

Día 23.—En Trapunto—Me escribió el Gobernador Per.

duzco, diciéndome que los rifleros del Norte pueden contar

con todos los recursos del Estado—Volvió el Gobernador

Ortega, de Guanajuato.—Zarogoza escribe que se mueve so-

bre San Mignel, porque con ir a Celaya, nada se sacará de

recursos por haberse ya asentado todos los capitalistas

de aquella población.—Los Generales Tnlestra y Echagaray

están en Guanajuato y este fltimo no ha sido recibido como

Comandante General vi tampoco lo recibirán.—Muy bien

se podrá preguntar con qué derecho el Sr. Degollado nos

nombra Comandantes Generales en los Estados —El Gober-

nudor Ortega ha arrestado al cura Lieéa, de este lugar y a

otro sacerdote, y los tiene con centinela de vista—No ha

dejado de haber sus desmanes por parte de algunos salda

dos, aunque esta población reaccionaria casi justifica enal-

quiera medida de severidad que se tome contra ella.—Los

rifleros del Norte con Zaragoza y Quiroga, tendrán que

aguardar parque de San Luis, antes de poder presentar ac-

ción.

Dis 24—En TIrapuato.—Salieron las fuerzas de Zacate-

cas para Silao y León.— El Gobernador Ortega se llevó

presos a los dos curas y a otros 6 clérigos, y este hecha can

56 su alboroto entre las mujeres.—Para evitar trastornos

mandé montar 50 de mis chinucos para que rondaran las ca-

Nes, y habiendo yo notado en la calle principal quejas de

mnjeres y hombres, en persona fuf y los despaché a sus ca-

O Biblioteca Nacional de España

MENONTAS DE LA GUERRA DE REFORAA “

sas sin notar que ninguno dijera ni una palabra, aunque na-

dic me acompañaba. —Muchos ereyeron que había sido una

temeridad aventurarme sólo eutre ellos—En la tarde legó

Orozco de Morelia, con algunos enfermos, y unos 30 y tantos

del Norte y Zacatecas —Después de socorrerlos y anotar su

pasaporte, los envié a Guanajuato.—Estoy a la expeetativa

del indio Mejía, que salió de México el 19 y llegará mañana

a Querétaro.

Día 25—Du Trapuato.—El indio Mejía Negó ayer a Que-

rétaro, y su ehusma Negará hoy.—Pretenden que otra fuer-

te división enemiga ha tomado el camino de San Luis, para

amenazar los nuestros en San Luis, y mañana escalonaré

mis exploradores de aquí a Salamanes.

Día 26—En Tropuato—El indio Mejía contimaha en

Querétaro esta mañava, y Medina avanzó sobre Celaya con

toda su fuerza, ep lugar de enviar solamente exploradores,

como yo le había prevenido —Ilegaron de Guanajuato los

tres oficiales de infantería que le había pedido al Goberna-

dor.—El Sr. Berdnzco, me eseribe que esté muy pendiente

del enemigo en Querétaro, y le dé aviso violentamente de lo

que ocurra de interés —Me dice que confía exclusivamente

en mi energía y activez para que lo ponga al tanto de cuan-

to haga el enemigo—Se asegura que el peladito Miramón,

renunció la presidencia y que sus ministros renunciaron sus

carteras.—NI ellos aceptan la renuncia del peladito, ni ste

acepta la de ellos.—Qué farsa de bribones y eriminales.—

Ta horea los aguarda, asesinos, como aguardaba a Piélago

y Monayo en Guadalajara—Es fuerza que paguen tanto

crimen.

«Día 27.—Eu Traphato.—Mañona hará un mes que a la

madrugada salimos de esta plaza para atacar a Pueblo Nue

vo, y desde esta noche aguardo la noticia por momentos de

que Villameva, que llegó anoche a Celara, a las 9, quizá

E

O Biblioteca Nacional de España

160 DIANIO DES CONONEL VALDE OO

avance ereyendo que me sorprenderá—He despachado un

extraordinario al Sr, Berduzco, diciéndole que si se aproxi-

ma el enemigo esta noche, que lo saldré a batir sin impor-

tarme su número, que es lo que no he podido averiguar—

Este bandido Villameva es el mismo a quien en Salaman-

en le di tan buon susto el día 9 de Febrer de este año, ena

do me mataron a Chacón —De Querétaro, salió una fuerza

para San Miguel de Allende, y ahora nos interesa xaber

lo que harán los de San Luis-—Tiempo ha sobrado para

moverse—Estoy como lego dicen, con el pie en el estribo,

y yA veremos lo que sucedo.

Día 28—En Irapuato. —Anoche entre las 11 y 12, lega-

ron Medina y Quiroz, de Salamanca, con alguna infantería

y caballería, y esta mañana llegaron unos 30 infantes del

Valle de Santiago.—Añn no sabemos en qué parte se en-

cuentre Villanueva—Antier llezó Márquez a Acámbaro, y

me aseguran que le legó correo pidiendo auxilio los de Gua

dalajara. — Escribió el Sr. Berduzco, recomendándome la

mayor vigilancia.

DíA 29.—En Trapuato.—Se corrieron los borregos de que

el asesino Márquez ha oenpado la capital de Michoacán y

que el Gobierno de Guanajunto hoy desocupaha la capital

del Estado—Lo cierto es, que la población antes de las $

se encerró en sus casas y para las 8 va parecía un Campo

Santo—Todos aseguran que esta noche evacunré yo la pla-

70 en retirada, y lo cierto es, que acabo de hacer este apunte

y me acuesto a leer un rato y después a dormir.—Supongo

«me antes de que me fusilen, tendrán la política de avisar

me. — Lo malo es que no puedo saber a punto fijo en qué

parte «e halla el enemigo, pues el Gobernador Rerduzco nos

escribe que el enemigo que había avanzado a San Migmel,

se replegó a Querétaro.—Medina recibió orden para que

con su caballería, la de Hernández y Barriga, avance a Ce

laya, dejándome en esta población levítica con mnos 15 0 18

O Biblioteca Nacional de España

MEMORIAS DE LA GUERRA DE RECORMA La

infantes—Se me dió orden superior para que al Subprefec-

to del Valle de Santiago le prevenga que se vuelva a aquel

punto sin abandonarlo mientras no esté seguro de que el

enemigo, en número considerable, avanza a ocuparlo

Dis 30—En Trapuato.—Elegó Paneho Hernández con

su fuerza y se incorporó a los de Medina, que por la maña-

na saldrán para Salamanca.—Se corre la voz que Villanue

va, está en el Valle de Santiago, 9 leguas de esta Viia.—El

indio Mejía está en Querétaro con unas 20 piezas de arti-

Mería y nnos 1,700 genízaros.— Se decía en México que el

peladito Miramón venía a la campaña del interior—Me es-

cribió el Gobernador pero no me comunica ninguna noticia.

Mayo 1%—En Irapnato.—Salió Medina con su fuerza y

esta noche está en Salamanca—Vino correo para el señor

Rerduzco, de Moroleón, y le dicen que el asesino Márquez

estaba antier a las goteras de Morelia —Salió falsa la noti-

cin de anoche de que el foragido Villanueva estaba ayer en

Valle de Santiago.

Dia 2—En Trapunto—La diligencia de México y Queré.

taro no legó hoy, y esto ha causado euidado—Me han ve-

nido ahora en la noche a decir que va a haber un movimien-

to esta noche, y he mandado patrullas para que estén a la

expectativa y hagan recoger a cuantos estén por las calles.

Fl Gobernador me escribe, que pronto estarán en esta pla-

74 los rifleros que ahora se hallan en Guanajuato, y que no

me mueva de esta plaza.—Maldito lo que apetezco mis lo-

nores civiles y militares entre esta gente—Despaché a Sa-

Immanca un oficial de confianza para que averighe cn qué

punto se encuentra el enemigo.

Dia 3.—En Trapueto—Se confirma la noticia de la ocu-

pación de Morelia por el asesino y ladrón Márquez—Flino-

josa legó esta tarde de Guanajuato a Tiripitío, y los ri-

O Biblioteca Nacional de España

ts ULARIO DER CONONER, YALDEX

fleros del Norte con Zaragoza están en Silao—Jestis Molina

Tegó hoy de Salamanea con alguna infantería y caballería.

El indio bandido Mejía Megó esta mañana a Celaya, con

unos 1,500 hombres y 9 010 piezas de artilleria.—Hernán-

dez, con las piezas de grueso calibre, salió ayer de Querétaro

para México. — Recibí esta noche carta de Pedro Tfinojo-

sa, y me dice que tiene orden para que las fuerzas de Sala-

manca y las mías se le incorporen —Envié a mi ayudants

Nachito Silieco a Guanajuato con cartas para el Gobermi-.

dor y su papá.

Día 4—En Trapuato.—Me eseribieron los generales Hi.

aojosa, Zaragoza y el Gobernador Berduzco—Hinojosa se

movió de Tiripitío a Burras, y Zaragoza de Silao a la mis

ma hacienda que forma por ahora nuestro cuartel general.

El Gobernador Ortega ha puesto sus fuerzas bajo las úr-

denes de Zaragoza, y lo mismo se ha hecho con las de Gua-

najuato que manda Hinojosa.—Mejía continúa en Celaya y

sin duda obran en combinación con los del asesino Márquez,

que vendrán de Moretia.—Rennt esta tarde u todos los prin-

cipales vecinos para que se encargara» del custodio (sie) de

la población en caso de tener yo que evacuar la plaza, como

lo verificaré si el enemigo avanza, pues aun sin (al enemigo,

con la pequeña gnarnición que es a mis órdenes, estoy pe-

endo la vida (sic) entre este populacho de fanáticos ende-

moniados.

Día 5.—En Trapuato.—Legaron Pedro Hinojosa, el pa-

dre Traspeña y otros de Burras, a verme.—Esta mañana

me aseguraron que Márquez había salido de Morelia, para

Guadalajara, y Huerta entraría hoy a aquella eiudad.—Es

fa noche por telégrafo me dice el Gobernador Ortega, desde

Teón, que le aseguran que Márquez había legado a Pénja

mo, que queda a 14 leguas de aquí.—Mejfa continña en Ce-

laya, y Medina sale esta noche para Salamanca, con el ob-

jefa de observarlo—Pancho Hernández, con el escuadrón.

O Biblioteca Nacional de España

MEMORIAS DE LA GUERRA DE REFORMA 1

sale por el camino de Pénjamo, para observar a Márquez.

Zuazua lega esta noche a Lagos, con 1,000 hombres: esto

me dice Ortega por telégrafo.

Dis 6.—A poco después de haber salido Hinojosa, Negó

Zaragoza, con unos cien rifleros.—El escuadrón Allende con

Medina, salió para Salamanea, y como a las 3 de la tarde

se me dió el aviso de que sus avanzadas y las del enemigo

que hoy entraron a Salamanca, se estaban tiroteando—En

el momento, la mayor confusión reinaba en la población, y

monté a caballo, formando los riferos en la plaza y desta

cando al ler. escuadrón de lanceros para apoyar a los de

Alende.— Las avanzadas enemigas se replegaron a Sala-

manea y después de estar Zaragoza y yo conversando por

telégrafo con Ortega, que está en Teón con los de Zacatecas,

salimos a las 7 de la noche, y llegamos a la Calera en cuyo

punto se mandó concentrar mnestra fuerza para avanzarla

mañana a Silao, que formará el cuartel general.—Al Negar,

me encontré con muchos amigos fronterizos y otros libera-

les que estimo.

Dra 7.—En la Calera.—Salieron los ríderos para Silao,

con Pedro Hinojosa, quedándose Zaragoza y plana mayor,

quien salió también para Silao en la tarde—Se quedaron

aquí los lanceros de Guanajuato, dándoseme a mí el mando

para cubrir a la retaguardia, y observar al enemigo, que to-

davía estí en Salamanca.—En el acto puse las avanzadas,

y despaché buenos exploradores, además de espías, a sus

mismos enarteles—Se confirmó la noticia de que el asesino

Márquez va para Guadalajara—Dicen los pasajeros de la

diligencia, que Vélez, nombrado Gobernador y Comandante

General de Guanajuato, salió de México con 800 infantes,

para reforzar al indio Mejía que está en Celaya.

Dia 8—En la Calera.—Los lanceros sacaron de la dili-

gencia, en la tarde, a in joven, llamado Tpiña, de Salaman-

O Biblioteca Nacional de España

_— DIAIIO DEL CORONEL VALDES _

ca. Me lo representaron como hombre que nos había perse-

guido muelo, cuando era Secretario de Pacheco, y que era

un renccionario consumado. — En vista de sus respuestas

contradictorias, le hice presente que quedaba arrestado

mientras el Gobernador no me diera orden para ponerlo en

Tibertad.—Se Jo entregué al Comandante Medina, quien lo

despachó arrestado a su cuartel.—A poeo rato of dos tiros,

y el que 19 había recibido para conducirlo al enartel, se pre-

sentó dando parte de que lo habían matado porque se había

querido fugar.

Día 9—En San Antonio—En la tarde moví la fuerza a

San Antonio y poco después de haber legado, entró uno co-

rriendo, y gritando “¡el enemigo '"—Pronto ensilló la fuerza,

y alfa ver lo que pasaba—La mayor parte de la avan-

zada que estaba en la Calera, se había dispersado, y me pre.

paré para batirme en retirada siel enemigo era muy supe-

rior en número —Después de algún rato, averigié que mu

oficial que había salido en comisión, se había emborracha-

do. y por sentimiento de que en la tarde le habían matado

un compañero, llegó cerca donde estaba la avanzada, dispa-

rando sus armas—El enemigo ni aun había legado a Tra-

puato

Día 10.—En Mediositio—Como a lax 8 de Ja noche llegó

uno de mis exploradores de más confianza, avisíndome que

500 dragones bajo las órdenes de Cruz y el foragido Villa-

mueva, habían entrado a Irapuato antes de meterse el sol—

Poeo después mandé ensillar, y cambié mi posición con ve-

mirme a esta hacienda.—La noche está muy hermosa, y pro-

pia para dar un golpe de mano—Es menester mucho cui-

dado,

Dí 11—Ev San Diego—En esta hacienda me asesina:

von a dos lanceros, el administrador y el mayordomo el día

$ en la noche—El enemigo continúa en Irapuato y mis ex-

O Biblioteca Nacional de España

— MENONIAS DE LA QUERIA DE REFORMA — 161

ploradores lo observan muy de cerca.—Face días que se no-

ta bastante disgusto entre los jefes y oficiales de todas las

fuerzas, debido a las economías muy mal entendidas del

Sr. Berduzco. Es menester que en circunstancias como las

que nos rodean, se guste con liberalidad para que la fuerza

no se distuste—Se movió el Sr. Nerduzco, de Silao a la

Luz, con la infantería de Guanajuato. — stos diablos de

todo se nsustan, y con estos movimientos alientan al ene-

migo.

Día 12.—En Silao —Recihí órdenes para que me retirara

a León, para enya ciudad salieron hoy los rifleros, que esta-

ban aquí.—De esta manera se les deja el campo libre para

que entren a Guanajuato a cuya ciudad no avanzaron mien-

tras la caballería bajo mis órdenes los encorralala on Tra:

puato—Zaragoza me escribe que en León me explicará el

objeto de este movimiento.

Día 13—En León.—Sin embargo de lo que me afirmaban

ayer tarde, para hacerme creer que el enemigo avanzaba por

Tomita; pero amanecí anoche en Silao, y a buena hora mo-

ví a fuerza para esta eludad. Aquí me encontré a Zaragoza,

al Gobernador Ortega, y a muehos otros ardientes partida-

rios del pueblo.—Temprano en la noche, llegaron los seño-

res Torduzco e Hinejosa, con el mixto, que estaba en la Luz.

Así queda completamente abandonada la opulenta ciudad

de Guanajuato que muy pronto volverá a caer en manos de

los hombres decentes de las garantías.

Dis 14—En León—El Sr. Berduzco, no deja de estar

sentido por lo que considera las imprudentes exigencias de

Zaragoza y otros de Znentecas.—Mueho temo que continúen

Jos chismes que tanto nos perjudicaron el año pasado, y que

dieron por resultado la derrota de Ahnaluleo—Aquí tene

mos multitud de gente imyendo de los que hablan de garan-

tías enseñándoles el patíbulo y el asesino (sic).

O Biblioteca Nacional de España

Ms nIAO DEL CONONEL VALDES

Dia 15—En León—Ta tropa se encuentra entusiasma-

da, y ganosa de vérselas con el enemigo—Nada se empren-

derá mientras no legnen las fuerzas de Znazua y Guadalu-

pe Gareía —Zuana se encargará en Jefe de toda la fuerza.

Todos sabemos que es hombre de armas, pero a veces los

pícaros que lo rodean lo hacen disparatar.

Dia 16.—En León.—En la tarde el Sr, uerta pronunció

uu disenrso muy rojo en las Casas Consistoriales, y en la

tarde lo repitió en la hermosa calzada de esta ciudad.—Con-

currieron os diferentes enerpos, y todos se retiraron llenos

de entusiasmo.—Por orden general se me dió a reconocer

como Jefe de las caballerías de Gnanajuato—La fuerza se

compone de los célebres chinacos del Bajío, y tienen la fa-

ma de ser hombres de arrojo y valor proverbial.—Recibí

carta del General Arteaga, dándome noticias del asesino

Márquez. — El aventurero Adrián Woll, manda en Jefe

las fuerzas enemigas que vienen a Guanajuato, y el indio

Mejía es su segundo.

Dia 17.—En León—Fl enemigo con sus avanzadas ocupó

a Silao y la Ta, desde ayer, y desde hoy habrá comenzada a

explotar los recursos de Guanajuato.

Dia 18—En León.—En la tarde salieron la caballería e

infantería, hasta la Garita, a encontrar a los riferos en nú

mero de 750, que pertenecen a Nuevo León y Coahnila—

Toda la fuerza viene magníficamente armada, y ya tenemos

más de la necesaria para echar al bandido Mejía en corrida.

Mañana entrarín los demás rifleros, y nuestra Merza en-

tonces se compondrá de unos 4,500 6 5,000 hombres—Artea-

gn con 1,000 hombres está en Acámbaro, y prohablemente

obrará en combinación con nuestra fuerza.

Dra 19—En León.—Esta tarde se formó toda la fuerza

para recibir a los de Tamaulipas y Nuevo León y Coamila,

O Biblioteca Nacional de España

— MEMORIAS DE LA GUENRA DO: REFORMA *—_

que en número de unos 1,000 y tantos hombres con 6 piezas

leguron en unión de Zuazun y Guadalupe García.— La

fuerza ahora en esta plaza pasa de 5,000 hombres, y los trai-

dores de Tucubaya se verán en apuros para hacernos frente.

— ln el (entro conocí esta noche a la señora de mi amigo el

Lie. D. Mignel Barrón, y a «nu muy hermosa enñada Flavia

Montes, bonita joven de nnos 17 años de estad.—Entre los

muchas que Tegaron esta tardo, vienen algunos e los muy

valientes con quienes hice la campaña de 55 en Tama

lipas.

Día 20.—En los Sances—Hoy se organizó el ejército en

brigndas, y las mandan Hinojosa, Sánchez Román, Zara-

goza; Guadalupe García y Tubio, la caballería, siendo yo

su segundo.—Hegamos temprano 2 esta hacienda, y en el

acto me puse a la cabeza de 100 caballos e hice que las avan-

zadas enemigas se concentraran a Silao—Esta maniobra

cansó tan buen efecto, que cl enemigo desocupó la plaza a

las 11 de la noche—Parte de los riferos salieron por los

caminos de Santa Ana y la Lu, y hoy las infanterías en

León avanzarán sobre Irapuato.

Día 21—En San Diego.—El movimiento que anoche hice

con los 100 hombres, no sólo hizo al enemigo salir de Silao,

sino también de Guanajuato, abandonando la plaza en la

noche y tomando el camino de Trapuato—Toda la brigada

de caballería y el segundo de riferos llegaron a Silno, en

la tarde y yo con los lanceros de Guanajuato avancé a esta

hacienda para observar de cerea al enemigo—Cuando éste

abandonó las plazas de Guanajuato y Silao, lo hizo de una

manera que indicaba todo su temor.

DA 22—En Rurras—Temprano me moví con la enballe-

ría de San Diego sobre Irapuato, y en la hacienda de San

Antonio me encontró un ayudante del Coronel rubio, pi

diendo auxilio, pues el enemigo en Arandas había trabado

O Biblioteca Nacional de España

“e DIANO Drt coNONEL VALDES O

el combate con la guerrilla que en la mañana había yo des-

tacado para observar a las avanzadas enemigas fuera de

Trapuato.—Esta guerrilla, contra mis órdenes expresas,

atacó a las del enemigo que en número muy superior es-

taban situadas en Arandas; los míos retrocedían cuando

yo Negné con más de 100 hombres escogidos, y el enemi-

20 entonces se puso en fuga para la plaza.— Los míos

seguían a todo escape, y pronto les dieron aleance y matavon

al Capitán de la avanzada. En corrida los metieron a la pla-

za, matándoles en el Puente al entrar un dragón y trayén-

dose las mulas de la artillería.—Este ataque audaz me obli-

26 a avanzar con el grueso de In caballería, para poner a

salvo a los míos que temerariamente se habían comprometi-

do, siguiendo al enemigo a sus atrincheramientos. — Este,

pronto salió con unos 1,500 hombres de las tres armas, y

muestra caballería con los riferos a retaguardia bajo el

mando de Escobedo, comenzó a retirarse en orden y paso a

paso, sin emhargo de los fuegos de Ia artillería enemiga—

El grueso de los rifleros «e retiraban por el camino real, y

parte de ellos con el grneso de la caballería en línea para-

Tela se movía sobre la derecha del camino que va a Guana-

jueto—Yo, con los célebres chinacos del Bajío, me movía

sobre nuestra izquierda para evitar que nos fanquearan por

ese lado.—Como a las 3 de la tarde observé que los nuestros

a la derecha del camino, corrían desordenados, enando re-

pentinamente hicieron alto, y comenzaron a hacerle fuego

al enemigo que de cerea los segufan.—Este a mu ven retro:

cedió corriendo, y los nuestros lo persiguieron hasta el

punto donde estaba su artillería e infantería que no sóle

los contuvo, sino que obligó a los nuestros a ceder el terre-

no en desorden.—El enemigo los seguía y en los momentos

críticos que amenazaba cargar con su caballería, recibí la

orden de atravesar el eamino rápidamente, y contener al

enemigo, amenazando dar la carga por su fanco izquierdo,

Tl resultado del movimiento fé feliz, pues al presentar.

O Biblioteca Nacional de España

DIENMORIAS DE LA GUENTA DE REGORMA 65

me por el fanco con unos 180 lanceros en batalla, el ene-

migo hizo alto, y los nuestros so contuvieron y de nuevo se

organizaron. —A poco rato entró la noche, y los muestros

se retiraron a las baciendas de San Antonio y San Diego—

Algunos se pasaron a Silao, y yo, con mos 60 hombres, per-

nocté en Burros, aunque algunos de mis oficiales ereían que

era una temeridad hacerlo.

Dra 23.—En Guanajuato. —Muy temprano me moví de

Burras a Ja Calera en cuyas inmediaciones fué el encuentro

de ayer tarde—El enemigo abandonó el campo entre las 7

y las Sy se concentró a Trapuato—Al levantar el enmpo

conté 7 de los nuestros y 29 del enemigo, además del Capi

tán que en la mañana dejé colgado ayer en la orilla del ca-

mino real, y el xoldado que mataron cerca del Puente—Al

entrar a Guanajuato me encontré a los rifleros que habían

abandonado la plaza, dejando la ciudad en manos de una

junta de vecinos —El Sr. Berduzco y el ¿reso de mmestras

fuerzas están en la Luz, supongo que el enemigo avanzará

Mañana a Silao.

Dix 24.—Pn Marfil.—Hoy llegaron de la Luz el grueso

de mmestras fuerzas, y entraron a Guanajuato con Zuazua,

Guadalupe García, Berduzco, Hinojosa, el Gobernador Or-

tega, León Guzmán, Cruz Aedo y otros jefes—En la tarde,

por orden de Zuazua se sacaron de la casa de Moneda

$160,000, y en la noche abandonaron la plaza, retirándose

Tinojosa con la brigada de Guanajuato y 6 piezas, tomando

el eamino de Salamanca. Los de Zacatecas, rifleros y fa-

maulipecos, se retiraron tomando el camino de San Telipe.

Salimos de Marfil. en número de unos 1,000 hombres de

las tres armas, y ya veremos si logramos salvar muestra ar-

tiliería que es lo mico que queremos hacer.

Dia 25—En Sincuala—Llegamos al Valle de Santiago

esta mañana a las 3, habiendo andado ayer 23 leguas, de-

O Biblioteca Nacional de España

_— DIARIO DEL, CORONEL. vALDES —

rrotando completamente a Joaquín Miramón, en Salaman-

ca, a donde había legado como u las 12 de Celuyn con el 52

de caballería que en número de 400 hombres iba a reforzar

al indio Mejía, que ayer entró a Guanajuato—En este ata

que acabó el 5. y su Jefe Miramón se escapó gracins a la

bondad de su esballo—les matamos más de S) hombres

con el aleance que dieron mis “cosacos” y se les cogieron

30 y tantos prisioneros, como también dos earros de parque

y vestuario, además de los equipajes de toda la fuerva.—El

pobre... de Miramón, nunca se habría visto por cierto tan

apnrado, y corría como liebre el pobre diablo.

Día 26.—En San Nicolás de Agustinos.—Aquí nos reuni-

mos con el General Arteaga, y su brigada de unos 800 hom.

bres de las tres armas, con la fuerza que ahora tenemos, no

es probable que nos derrote el enemigo, si nos resolvemos a

darle alguna acción—El enemigo ayer desprendió el grue-

so de sis fuerzas sobre nosotros, y por ahora le saenremos

el cuerpo.

Día 27.—En Acámbaro—aA las 3 de la mañana salimos

de San Nicolás, y al amanecer pasamos por Salvatierra. A

mí me tocó cubrir la retaguardia. — Esta es uma posición

ventajosa, y aquí aguardaremos noticias para resolver nues.

tros movimientos.

Día 28.—En Acámbaro—Toda la ferza Negó muy cao-

sada, y necesita algún reposo antes de moverse. .

Dis 29.—Bn Acámbaro—Salió el General Arteaga, a te

ner una entrevista con el Sr. Muerta-—Se arregló el servi.

elo de las dos brigadas, tomando Arteaga el mando en Jefe

y Pedro Hinojosa 2? en Jefe-—Se corre la voz de que los ri-

Seros se han metido a Guanajuato, derrotando a los que el

indio Mejía dejó en aquella plaza con 6 0 7 piezas de arti-

Mería.

O Biblioteca Nacional de España

amMoNIAS DE LA GrENIA De QESORMA — 167

Día 30.—En Acámbaro—El indio Mejía nos vino siguien-

do hasta el Valle de Santiago, y parece que se ha ido para

Celaya. —Podrá ser que los vieros por el camino de San Mi:

quel, amenacen a Querctaro.

Di 31—En Salvatierra—Salimos de Acámbaro a bue

ma hora, y temprano llegamos a Salvatierra.—Se nos ase-

gura que el indio Mejía, con 17 piezas y 1,500 hombres, sa-

Tíó ayer de Celaya para Querétaro,

Jexto P.—En Valle de Santinzo 61 día después de sa-

Tir nosotros de aquí al 25 del próximo pasado, llegaron los

titulados Generalos Woll, Mejía, Cruz, Herrera, Ziros y

otros, con 17 piezas y 2,500 hombres. Aunque supieron que

estábamos cerea, seis o siete leguas de esta plaza, no se re-

solvieron a seguirnos, sino que a las 12 horas después con-

tramarcharon a Salamanca, véndose Vélez con unos 1,000

Nombres para Guanajuato, Mejía con 1,500 para Querétaro,

y Woll para San Mignel con igual número.— Nada se re

snelve en enanto a nuestro plan de operaciones y queremos

que Zuazua, para asegurar el golpe, obre en combinación

con nosotros.

Dr 2—En Salamanea—antes de amanecer salimos de

Salamanca, tomando para Guanajuato el camino Temasca

tió.—Como a las 3 se avisó que las avanzadas enemigas, esta

han en Puentecillas, y en el acto destegué nna guerrilla ba-

jo el mando de Pancho Hernández, tanto para reconocerla

como para hacerlo que se concentrara a la plaza. Mientras

esto sucedía, el asesino y Indrón Márquez se aproximaba a

Guanajuato por el camino de Silao, con unos 700 dragones

sin saber nosotros que venía, ni él tampoco que estábamos

tan de corea a sms cofraidores.—A paco después de despren-

derse la eerrilla se comenzó a tirotear con el enemigo, y

éste se sostuvo hasta que yo Negué y con los “cosacos” la

comencé a arrollar—Pronto comenzaron los míos a dar la

O Biblioteca Nacional de España

E MANO DL CORONEL, ALDES

carga, y el enemigo huyó a todo escape por el camino de

Marfil, y en el alcance hirievon uno y cogieron enatro pri-

sioneros, además del herido. Los primeros eran de los del

bandido Márquez que venían entrando. Pronto llegó el grne-

so de la fuerza y el enemigo que a carrera abierta pasó por

Marfil, colocó toda sa caballería en el camino real entre

Guanajuato y Marfil. Hecho el reconocimiento de costum

bre, se colocaron 2 piezas en puntos dominantos, y a los

cuantos cañonazos se concentraron 2 Guanajuato. — Todo

muestro tren avanzó, y se tomaron las medidas necesarias

para el ataque de la plaza mañana.—Yo con mi caballería

me acuartelé en Marfil, y sin embargo de que todos nos ase-

guran que de Guadalajara viene un refuerzo fuerte a los de la

ciudad eitada; que nuestra tropa se muestra ansiosa «e vór-

selas con el enemigo.

Día 3.—En Marfil. —Como a las 8 de la mañana, se em-

prendió la retirada de Marfil, para San Luis, pues se supo

«ne de Teón venía la infantería enemiga eu socorro de la

plaza. Además de este refuerzo y 700 dragones que entra-

ron ayer tarde a la plaza, pueden ser auxiliados por los que

están en San Miguel bajo las órdenes del aventurero Woll.

Día 4.—En la Tas.—Según Jus órdenes que recibí de TT

nojosa, me coloqué con la caballería en Guanajuato y en el

Cerro de la Enz, para Mamarles la atención, o atararlos, si sa-

bíamos (sic) que nos retirábamos, saliera a persegnimos—

Lejos de moverse como yo lo había temido, permaneció en sus

posiciones observando los puntos que yo cubría, y que daban

vista a Guanajuato, a Marfil y al camino de Silao, por donde

se espera hoy su infantería—Va tarde me relevaron con 2

piezas de artillería, Jos batallones Allende, Fieles de Valle,

retiríndome yo a la mina de San Pedro, para que mi cahalle-

ría comiera y descansara was cuantas horas—La situación

que guardamos esta noche, es sumamente crítica si el enc-

migo avanza en la noche para comenzar a hostilizarnos ma-

O Biblioteca Nacional de España

MEMORIAS DE LA GUERRA DD REFORMA

ñana, y si nos carga con demuedo, probablemente perdemos

nuestra artillería. Estamos resueltos a presentar batalla

sin hacer caso del número que nos ataque; y enando bien

les vaya, haremos un esfuerzo glorioso para que el triunfo les

cueste caro. ¡Animo! y veremos mañana quiénes xen- los

hombres de más corazón.— En estos momentos que todos

más o menos dexconfían del éxito, yo continño firme en mi

fe, y n0 creo que los resultados nos sean desfavorables. —Yu

veremos, y no desmayemos.

Día 5.—En la Sandía —Ya tarde salimos de la uz, y po-

co después teníamos al enemigo a la vista. En orden conti-

muamos la marcha, aunque antes de salir de la Cuesta se nos

quebró la eureña de una de las mejores piezas, y el enemigo

so nos presentó cubriendo las alturas con su infuntería, ar-

tilería y caballería.—Pronto se tomaron posiciones para

batirlo en caso que se quiera bajar al plan, y tan lego como

«miso hacerlo, se le abrieron los fregos emm dos de nuestras

piezas. Tos tiros Meron certeros, y el enemigo se contuvo

contestando con dus piezas de montaña sin cansarnos nin

gún daño. Tos mestros les desmontaron una de sus piezas

y se le hicieron algunos muertos.—Viendo que no haría por

atacar mmestras posiciones, continuamos muestra retirada,

sin que el enemigo xe moviera —Atravesamos el camino de

Teón, y con la noche llegamos a esta hacienda.

Día 6—En Cuerímaro—A buena hora Negamos a esta

rica hacienda de los frailes; y me alojaron en la casa del

padrecito, que se mostró muy cariñoso y afable. ;Dios se lo

pague!—El enemigo se metió a Silao, y parte de ellos se pa-

saron a León.—Nuestra fuerza probublemente se pasará a

Morelia, con el fin de arreglar el plan de campaña, aumen-

tar la división y conseguir más armamento.

Dia 7.—En Pénjamo.—En Corralejo los Lics. Luna, Palo-

minos y otros liberales, nos dieron un almuerzo, y temprano

O Biblioteca Nacional de España

m0 MARIO DEL CORONEL VALDES _

legumos a Pénjamo, y sin embargo de la resistencia de los

“chinacos,” se resolvió que toda la división marchara a Mo-

relia, con el objeto de resolver definitivamente el plan de ope-

raciones.

Día $—En Surumuato—Ya tarde salimos de Pénjamo y

a buena hora llegamos a esta hacienda.—Parte de la caba-

Mería se fué con Baygén, a la Piedad con el objeto de im-

poner 2 aquella población un préstamo de $10,000.—Según

se nos asegura, Ortexa, de Zacatecas, Zuazua y Guadalupe

García, han tenido sus disgustos después de la retirada de

Guanajuato.—El dinero de la Casa de Moneda les ha hecho

daño.

Dis 9—En Puruándiro o sea ciudad Calderón—Idega-

mos temprano a esta bonita población en el Estado de Mi-

choacán.—En la tarde salí con el General Arteaga a dar una

vielta y ver la estatua del fiuado Calderón, que está en el

centro de na de las plazas de esta población. Calderón tué

muerto en la acción de Salamanca, baleándose contra los ge

nízaros de los traidores de Tacubaya. Tra hombre de mérito

y provecho—Se impuso un préstamo para el socorro de 2

días a toda la población. —Se corre el borrego, de que el pe-

Jadito Miramón y el tallador Zuloaga, se han peleado en Mé-

xico—Déjenlos, el patíbulo los aguarda.

Dix 10.—En Tecacho —Temprano salimos de Ciudad Cal-

derón, y a buena hora llegamos a Tecacho. El General Ra

múrez y yo, con las caballerías de Morelia y Guanajuato, y

la artillería, tomamos el camino de Tecacho, y los Generales

Hinojosa y Arteaga, tomaron el de las lomas con la infante-

rís.—Mañana Negamos a Morelia.

Dia 11.—En Morelia.-—Tempreno llegamos a la hermosa

capital del demócrata Estado de Michoacán. El General Ar-

teaga me presentó ep la plaza de armas al General Huerta,

O Biblioteca Nacional de España

MENORIAS DE LA GUENRA DE REFORMA OL

a quien le falta la mano izquierda, perdida en defensa de

los derechos del pueblo.—Aquí nos encontramos con multi

tud de liberales pertenecientes a los Estados limítrofes, y si

exceptuamos a Nuevo León y Coahuila, ninguno de los de-

más Estados presenta tantas garantías a los demócratas del

país como los que ofrece el Estado de Michoacán—Huerta

ex hombre en la flor de su edad, y a golpe de vista se penetra

uno de la lealtad y buena fe que le distinguen.

Dia 12—En Morelia —A la una de la tarde pasamos con

ilínojosa y toda la oficialidad, a ver al Sr. Huerta: Nos re-

cibió con afabilidad, y nos hizo presente que sus preparati-

vos para sostener la emiea, continmaban.—El asesino Már-

quez ha regresado a Guadalajara, y el aventurero Woll pasó

por Salamanca el día 7.—En México, asoma la desunión en-

tre la chusma que se titula Gobierno.

Dia 13—En Morelia.—Se celebró una conferencia en la

casa del Sr. Fuerta, para arreglar la reorganización de las

ferzas que operan sobre Guanajuato y Querétaro.—El se-

ñor Huerta se burló de Degollado, Doblado y todos los par-

tidarios de este último, que habían ereído que su favorito

sería Gobernador de Guanajuato porque así lo meditaba Don

Santitos; los pormenores del modo en que Huerta se burló

de todos ellos sin chocar con ninguno, son característicos del

actual Jefe de Michoacán. El Sr. Huerta medita seriomen

te en nacionalizar los bienes del clero de Michoacán. Esto es

poner el dedo en la llaga, y gane quien ganare, los pudrecitos

muaráo la másica—Se continúa con mayor actividad la

cliboración de parque, fundición de cañones, compostura de

armas, ete,, ete-—Con Michoacán, Jalisco y Nuevo León y

Coahuila, sobran para hacerle frente a los traidores de Ta-

cubaya.

Día 14.—En Morelia.—Se pasó revista de Comisario y vi-

sité el soberbio edificio llamado el “Seminario”—Huerta,

E

O Biblioteca Nacional de España

192 DIARIO DEL CONONEL VALDES

lanzó del establecimiento a los padrecitos y colegiales y les

convirtió el edificio en cuartel para sms tropas—Sux libre

rías, muebles, ete., se los dió al Colegio de San Nicolúx—Se

resolvió anoche que las fuerzas expedielonarias se muevan

cuanto antes.

Dra 15—En Morelia—Nada de nuevo, y se han soltado

las aguas que tanto nos perindicarán en la expedición. —El

Tic, Guden me presentó esta tarde a la intereximte señora

esposa del General Arteaga, hija de la ardiente Snr, y tan

roja en principios como es de suponerse que lo será la señora

y compañera de un hombre del temple político de Arteaga

Día 16—En Morelia —Se dió orden de mareha, y maña-

na salgo por el camino de la montaña para Purnándiro con

la enballería.—Einojosa, con la infantería y artillería, to-

mó el camino carretero, y nos reunimos en Pénjamo—Se re-

fnndió el batallón Fieles del Valle en el de Allende, por lat in.

moralidad e ineptitud de sn oficialidad.—Entre otros que

nos acompañarán, será el Lic. D. Juan José Faz.

Día 17.—En Hurundaney.—Me despedí de la señora er:

tu, Arteaga y la interesante señora de este último. A Inena

hora saif para esta hacienda, donde aleancé la fuerza. Pro-

bablemente no saldrá Hinojosa hoy.—Arteaga, con la briga-

da de Michoacán, anenazará la líuea de aperaciones del ene-

migo, por Celaya y Querétaro,

Dia 18—En la Ciudad Calderón—Al Negar en la tarde

me vino a encontrar el Jefa Político acompañado de aigunos

Taneeros.—Todo el día nos llovió, y el camino por la Sierra

está pesadísimo.—Sin embargo de mi vigilancia, no deja de

haher sus desórdenes.

Día 19.—En Parajas.—A buena hora Negamos a esta Villa

sin ninguna novedad.—Jesús Medina, con unos 40 y tantos

se separó de la fuerza esta mañana en Cindad Calderón.—

O Biblioteca Nacional de España

MEMORIAS DE LA GUERRA DE REFORMA 1

Este hombre, Medina, es un bandido y cometerá atrocidades,

aunque quizá le costará caro.

Día 20.1 Pénjamo—aA buena hora Nezamos a esta Vi

lla sin ninguna novedad.—Llegaron algunos de los que con

Medina se separaron antier de la fuerza en Ciudad Calde-

rón —Los de Pueblo Nuevo, se volvieron a pronunciar, y una

partida de los mestros logró aprehender a los 5 cabecillas

y los pasaron por las armas.—Los genízaros clericales se

han movido de Guanajuato a San Miguel, y en Irapuato tie-

nen una corta emarnición—Las aguas han comenzado, y los

emninos del Tajío se ponen intransitables. Esto paralizará

Tas aperaciones militares.

Dia 21.—En Pénjamo—Tas aguas continúan y nada de

positivo se sabe de los movimientos del enemigo-—Se asegn-

va que los vifleros por Sau Miguel Allende amenazan a Que-

rótaro.

Día 2—En Pénjamo.—El enemigo se ha concentrado en

Guanajuato y en Trapusto tienen unos 200 hombres.—Maña

na me muevo con la caballería a la Piedad con el objeto de

remontar y sacar recursos. Entonces veré si, sin embargo

de las aguas, les doy un golpe con la caballería sola a los ge-

nízaros en Trapuato.—Arteaga, con las fuerzas de Morelia

amenaza la línea enemiga de operaciones por Acámbaro.—

Dicen que el indio Mejía se ha ido a la Sierra. Este meco

es el hombre de más cuenta entre la chusma de pillos y trai

dores en las filas reaccionarias.

Día 23—En Ruenavista—Después de la función de Cor-

pus salí con parte de la caballería para la Piedad y pernocté

en esta hacienda para aprovechar lus pasturas —Nos nsegu-

ran que el enemigo comenzó a llegar ayer a Irapuato, y que

la mayor parte de las fuerzas en Guanajuato las han movido

porque los rifleros por San Miguel amenazan a Querétaro.—

O Biblioteca Nacional de España

10 DIARIO DEL CORONEL VALUBS

Mañana lesará Hinojosa 1 Pénjamo, con la infantería y ar-

tillería.

Día 24.—En la Piedad.—Temprano llegamos a la Piedad.

Tn Santa Ana Paeneco, me encontraron el Jefe Político y el

Presidente del Ayuntamiento, que son buenos amigos.—Lle

garou Gadea y Morales, para hacer efectivo el cobro de la

aleabala que deben los dueños de la hacienda de Santa Ava.

Me alojé en la casa de D. Ignacio Guerra.

Dia 25.—Eu Buenavista —En la tarde salimos de la Pie-

dad, después de haber cobrado unos 600 pesos a buena cuen

ta de la aleabala que deben los dueños de la hacienda de

Santa Ana Pacueco.

Día 26.—En Pénjamo. —Ayer legó la infantería y cahalle-

ría con Hinojosa, de Morelia, y aguardaremos los aconteci-

mientos antes de movernos.—La falta de recursos es la eter-

ma rémora a cuanto se emprende.

Día 27.—En Pénjamo—Tas aguas continñan, y los ca-

minos se han puesto intransitables.—Se asegura que el enc-

migo se ha salido de Guanajuato y que los rifleros amena

zaz a dicha ciudad por el Rincón de Ortega, a la vez que por

San Miguel ponen en peligro a Querétaro.

Dia 28—En Pénjamo—Las Jinvias continúan sin inte-

reupción.—Kalió parte de mi regimiento con Maya, para ha-

cer efectiva la ejecución contra la hacienda de Santa Ana

Pacueco.—Se asegura que los riferos han entrado a Guana-

juato—Nunca como ahora he sentido el mal estado en que

se halla la caballada.—Sin embargo, ya veré si logro dar un

hen golpe de mano a los traidores de Tacubaya.—Se trata

de celebrar un concilio en México, con el objeto de facilitar

$20.000,000, al titulado Gobierno del peladito Miramón.—

¿Digna ocupación para los Ministros del manso Cordero!

O Biblioteca Nacional de España

MENORIAS DE LA GUERRA DE REFORMA. ue

Der 29 Ar. 10 0 Jurso.—En Pénjamo.—En la tarde del 29

fuí atacado de hernia, que al último se desarrolló en conse-

cuencia del mal tiempo y lo mucho que me he maltratado en

la campaña—Sin embargo del cuidadoso empeño de los mé-

dicos, mueho fué lo que sufrí por unos seis días, pero al úl-

timo la enfermedad cede, y hoy me encuentro en el estado

siquiera de poder montar a caballo.—Parte de las fuerzas

del asesino Márquez hav sido derrotadas por Pesqueira y

Coronado en el camino de Mazatlán.—Márquez pide auxilio

a los de Guanajuato, a la vez que Ogazón le escribe a Ortega

de Zaentecas, que con aproximarse a Guadalajara, la capi-

tal de los tapatíos suenmbirá.—Por otro lado, los rifleros

amenazan a Querétaro y Guanajuato al mismo tiempo, mien

tras que se nos asegura ahora, que en Puebla se pronuncia.

ron, y que el Estado de Oriente pronto amenazará a la mo

derna Babilionin.—Los movimientos del enemigo en estos

días indican, que lo que busca es tener su retirada libre a

Querétaro.—Quién sabe cómo le vaya si logro ahora que es

toy sanando, rennir unos 400 caballos —No sería el primer

susto que le he dado.

Día 11.—En Pénjamo.—Las lluvias continúan, y gracias

a Dios que estoy bastante aliviado para pasearme a ratos

en la sala, aunque estoy muy débil—Le conducta de Gun

dalupe Gareía, después de la retirada de Guanajuato a San

Luis, fé vergonzosa, y es muy triste que semejantes hom-

bres estén al frente de parte de nuestra fuerza armada ; nun-

en se hará uada con semejantes campeones,

Día 12—En Pénjamo. —Las aguas continúan sin inte

iupción, y con esto los caminos se ponen intransitables—

Nada de nuevo, no se trata de marcha todavía.—La inmo-

vilidad de Zuazua es en consecuencia de sns enfermedades

secretas de que adolece,

Día 13—En Pénjamo. — Znama nos previene que este

O Biblioteca Nacional de España

100 DIARIO DEL CONONEL, VALDES

mos listos para marchar a primera orden.—La proposición

de Huerta, para que se nombre General en Jefe de todas las

fueras constitucionales, no tiene aceptación con Zuazua.

y su séquito.—Rezón tiene para uo desearlo.

Día 14.—En Pénjamo —Yada de nuevo, y estamos como

luego dicen, con el pic en el estribo.—Por voluntad de Dios,

me estoy restableciendo completamente en mí salud.— El

reclutamiento de gente para nuestra brigada, continúa en

Moroleón y Yariria

Dra 15.—En Pénjumo.—Se recibió noticin de que el señor

Degollado había desembareado en Tampico, con la artillería

y recursos para el aumento de las fuerzas que operan en el

centro. y pronto amenazarán de muevo a la capital —La no

ticía se ha celebrado esta noche con música, ¡Inminaciones,

ete —El 25 del corriente se reunirán en Zamora, los comisio

nados nombrados por los Gobernadores y Jefes de fuerzas

constitucionales, que por invitación del Sr. Muerta, deban

nombrar el General en Jefe de todas Jas fuerzas constitucio

nales en el interior.

Dra 16—En Pénjamo. — El Gobierno Constitucional ha

nombrado a D. Juan Zuazua, General en Jefe de las fuerzas

de Guanajuato, San Tuis, Aguascalientes, Znentecas y Nue

vo Teón y Coaluila.—El nombramiento que ahora hieieran

los Gobernadores y Jefes Constitucionales sería superfluo,

Día 17.—En Pénjamo.—Las aguas contintan, y nada se

puede hacer mientras no recibamos órdenes del cuartel ge-

neral. — Los mochitos están escalonados de Guanajuato a

Querétaro.—Nada de nuevo.

Dia 18—En Pénjamo —Continuamos en la inacción, y las

amas que continúan, paralizan la operación de Ja campaña,

Nada de nuevo,

O Biblioteca Nacional de España

MENORIAS DE LA GUENRA DE REFORMA 167

Día 19.—En Pénjamo—Nada de mevo, y las aguas con-

tinñan.—Todos estamos aburridos de esta vida ociosa.

Dra 20.—En Pénjamo.—Se recibieron noticias muy favo-

rables de Guadalajara y San Luis.—Guadalupe García fué

acusado por el Gobernador de San Luis, por desertor, y 10

están srmariando.—Pronto alriremos la campaña bajo as-

pectos muy favorables.

Dia 21.—En Pénjamo—Esta mañana llegó correo comu-

nicando la noticia de la derrota del Sr. Huerta, en Acámba-

ro, antier por el lazarino Villanueva.—Es muy triste perder

con semejante baraja, como lo diría Zuloaga.—Se asegura

que en los momentos del combate, la mayor parte de los de

Huerta se pasó al enemizo.—Exte Villanueva es el mismo

hundido que el 9 de Febrero de este año, sorprendí de noche

en Salamanca, y con nn número muy inferior le eché en co-

rrida hasta Celaya.

Dia 2—En Pénjamo.—En da ociosidad, y los aguaceros

continúan, de manera que es imposible emprender operacio

nes militares —Nada de nuevo.

Dix 23.En Péojamo—Nada de umevo, y la escasez de

pusturas y víveres nos obligará a movernos a la Piedad.

Día 24—En Buenavista —Temprano salí de Pénjamo con

la caballería, y en la tarde llegaron la artillería e infan

tería.

Día 25—En la Piedad —Día de Santiago—Nos encon-

tramos en la población enmusicada, y a Hinojosa lo recibie-

ron con música y las mayores demostraciones de regocijo.—

En la tarde hubo banderas por las calles, músicas, canto,

etc, ete-—Nada sabemos de lo que pasa por Guadalajara, Mé

xico o San Luis.

Día 26—En la Piedad.—Nada de mevo, y pendientes de

órdenes en el cuartel general en San Luis.

O Biblioteca Nacional de España

168 DIARIO DI, CORONEL, VALUES .

Dia 27.—En la Piedad.—Agnardando órdenes, y ya hace

hoy 3 días que no nos Jueve—Si el tiempo se alzara pronto

se pondríen los caminos en estado de emprender algún movi-

miento de importancia.—Nada de nuevo.

Día 28.—En la Piedad.—Se recibió correo del Sr. Huerta,

y pone una carta Hinojosa, haciendo presente la injusticia

con que sus enemigos le hacían la guerra en Morelia, y la

necesidad que tuvo de expulsar del Estado a mi amigo el Co-

ronel Menocal y a 3 individuos del Congreso del Estado. Ts

muy probable que la justicia y la razón estén de parte del

Sr. Huerta.—El titulado Gobernador de Guanajuato, Vélez,

ha despachado pie a tierra para México al Coronel Mena, y

4 unos otros 40 señores caracterizados de Guanajuato. —; Vi-

va el egoísmo de nuestros liberales! ¡ Gloria al partido de la

Picota !—Lo cierto es, que Zuazua en San Luis, está perdien-

do el tiempo como el año pasado, ni aun el recuerdo de Ahua-

Muleo nos hace obrar con actividad; es evidente que al tomar

la ofensiva toda la línea de Guanajuato a Querétaro se per-

dería por el enemigo-—Aseguran que el indio Mejía se metió

2 la Sierra.

Día 29—En la Piedad.—Salió Maya para Monterrey, y

lo acompaña el escuadrón Allende, que lleva orden de incor-

porarse a las divisiones unidas.—escribí al Club de los To-

los, rotulando la carta a mi amigo el Dr. Mearz, de Monte-

rrey.—Nada de órdenes.

Día 30-—En la Piedad.—Nada de nuevo, y por falta de

recursos no nos ponemos en movimiento.—Las malditas aguas

continúan.

Dra 31.—En la Piedad.—Al último se puso el dedo en la

Tiaga, y el Presidente de acuerdo con todo el Ministerio ha

nacionalizado los bienes del clero. Esta era la medida que

exigía la salvación de México, y de la ejecnción de este de.

O Biblioteca Nacional de España

auNoRIAS DE LA GUERRA DE REFORMA 100

creto depende la felicidad de esta República—La posteri-

dad colmará de bendiciones a los que abandonando el térmi-

no medio, se resolvieron a jugar el todo por el todo—No

son las medidas a medias Jas que salvarán la situación, y nos

perdemos si no se obra con la infexibilidad severísima del

Romano en tiempo de sus Catones y Emilios.—Se recibieron

proclamas del Sr. Degollado, y el hombre al último habla

de ser inflexible en la aplicación de la Ley. Dios lo conceda.

Tas operaciones de las divisiones unidas, comenzarán sus

operaciones en toda esta semana, y Zuarua escribe que se

emprenderán con toda actividad.—Tas noticias se celebraron

con repiques a vuelo, salvas de artillería. cohetes, serenatas,

etc... ete—La falta de recursos y el estado pésimo de los ca-

minos embaraza nuestros movimientos.

Acosto 1%—En la Piedad.—Nada de mevo.— Mañana

saldremos para Arandas—Ta inaeción nos fastidia

Día 2.—En los Fresnos —Antes de llegar, por la obseuri

dad de la noche y el aguacero que nos cayó, nos salimos del

camino, y después de las 10 de la noche, llegué con la caba-

Vería a esta hacienda.—Dios tenga piedad de mí en esta

campaña.

Dra 3.—En la Cañoda.—Poniéndome a la cabeza de la ca-

ballería, pasé por Ayo, y pernoetamos en la Cañada y Sau

Tenacio. La artillería e infantería pernoctó en Ayo.—Ta no-

che estaba horrible y el agua cayó a torrentes—Se dice que

en Arandas nos aguardan a mano armada-—Mañana lo sa-

bremos mejor.—El camino ha estado muy pesado para la ar-

tmería.

Dia 4.—En Arandas. Todo el camino pésimo. — Todos

los hombres de más representación en esta Villa, se han ido

para Guadalajara, Tepatitláo, León y otros puntos, para no

exponerse a sufrir los impuestos que recandan las diferentes

O Biblioteca Nacional de España

E TIARIO DEL CONUXEL VALDES “

partidas sueltas de tropa y guerrillas que pululan en el país.

Pobre México, si pronto no se pone un fin a la aetual con

tienda,

Día 5.—En Arandas—Llegó el señor Jefe Político de la

Barca, D. Celso Navarrete —Le acompañan nos 100 hom

bres de infuntería y caballería.—Se dificultan recursos, y es

inercíble euánto pueden aguantar nuestros oficiales y solda

dos sin sus haberes.—Las aguas continúan, y por tanto se

entorpecerán toda clase de operaciones militares.

Día 6.—Eu Arandas —Hegó Rubalcaba con unos 30 lan-

ceros más para mi rezimiento—Nada de nuevo, y las agnas

continfan.—Se pasó revista de Comisario con fecha de ayer.

Dis 7.—En Arandas—Casi toda la población, siguiendo

los consejos de los padrecitos, han abandonado esta plaza, :

1a mayor parte de las casos están cerradas —Esto se atribu-

yea las extorsiones de Pueblito, cuando estuvo aquí una vez.

La escasez continúa, y el tiempo se está perdiendo, a la vez

que nos hemos retirado demasiado de la línea de comnniea-

ciones.—Nada sabemos de lo que estará pasando en las de-

más fuerzas del ejército federal.—Es preciso hablar con

Hinojosa para movernos cuanto antes.

Día $—En Arandas —Continmamos en la inueción—Se

recibió comunieación oficial del Prefecto de San Pedro Pie-

dra Gorda, quejándose de las atrocidades que de paso por

aquel pueblo cometió Antonio Santuña, con los que le acom-

poñaban para incorporarse a Jas divisiones nnidas.

Dia 9.—En la Tapona.—Ya tarde salimos de Arandas, y

con la noche llegamos a esta hacienda.—Se recogió bastante

caballada, para remontar la caballería.

Dis 10-—En los pueblos del Rincón, en el Estado de Gua-

najuato.—Ev el Comedero, se refundió la mayor parte del

O Biblioteca Nacional de España

MENONIAS DE LA GURIRA DE REFORMA Mm

escuadrón Chacón, después de poner arrestados u Mernán-

dez (a) el Cantarito, y Cipriano Arredondo. Se llexó a dar

la orden de pasar por las armas al Cantarito, y esta provi-

dencia que pronto se revocó, causó la mavor sensación entre

mis ehinacos.—Mo adelantó con el arness de la caballería a

este pmebilo de San Francisco del Rincón, y aunque Tegné en

Ta noche, me recibieron con música, repiques, ete.—Formó la

mera en la plaza y pronto prorrumpieron en vivas a la Ti

hertad. al General Hinojosa, al Coronel Valdés, ete.— El

enemigo «e halla ev León.—He tomado las medidas necesa.

rias par evitar una sorpresa.—Mañana sabremos si Pacheco

que manda en León nos resistirá o abandonará la plaza.—

Díos proteja nuestra justa eausa.—Mis lanceros descansan

wn rato mientras ya velo y observo el sueño tranquilo de

Txnacio, mi fel cocinero que duerme al pie de la mesa.—El

criado duerme sin ni siquiera sospechar el peligro que tiene

a sur amo despierto.

Dia 11,—En León—Como a las 3 de la mañana salimos

de Jos pueblos del Rincón, y ala misma hora la infantería

enemiga se ponía en marcha de esta plaza para Silao—Me

adelanté con el escuadrón Finojosa, con el objeto de ver si

podía dar mu susto al enemigo—Al llegar supe que el Go-

hernador Pacheco neahuha de salir y en el momento lo seguí

por el camino de Guanajuato a todo escape, El hombre iba

many bien montado y se escapó gracias a la hondad de sn ca-

ballo.—Se me asegura que los rifleros se retiraron de San Te-

lipe para San Luis, y esto nos deja muy expuestos.—Quiroga

por disgustos que ha tenido con Zuazua, según informes, se

ha separado con su fuerza y quizá se nos incorporará.—En

tal caso podemos hacer frente a los mochitos sin pérdida de

más tiempo.

Dia 12—En León.—El enemigo en número muy superior

se ha movido sobre nosotros, y ya que hasta ahora hemos

logrado burlarlo, es menester conservar la reputación de

O Biblioteca Nacional de España

1 DIARIO DEL CONONEI, VALDES

nuestra brigada y no comprometerla.—Todo se prepara y a

las 10 nos moveremos, tomando el camino de Lagos.—Vamos

muy agradecidos del buen comportamiento de los de esta bo-

vita cindad.

Dia 13.—En Lagos —Llegamos como a las 9, y a las 10 de

la noche salimos de esta bonita población, para pernoctar

en la hacienda de la Estancia —El enemigo se movió de Gua

dalajara, a la vez que sobre nosotros se movían de Irapuato

y Silao —El objeto era cortarnos la retirada para San Juan

de los Lagos, a donde ayer se concentró la fuerza que ocnpa-

ba esta plaza.—Cerca de esta población en días pasados, las

acordadas me mataron a mi ayudante el Capitán D. Refugio

Sánchez, y a sn asistente, ¡Pobre de Sánchez! Me sirvió con

lealtad, y lamento su triste fin —Con el movimiento de ano-

che y ahora, el enemigo queda burlado, y muy pronto sabre-

mos si levará a efecto su intención de invadir los Extados de

San Luis y Zacatecas.

Día 14.—En la Estancia —En ésta descansamos hoy, y el

enemigo avanzó más acá de León.—Se recibió correo de Za

entecas, dando órdenes para el castigo de Quiroga por su in

snbordinación—Quiroga, abandonando el punto de San Fe-

lipe, se retiró a Aguascalientes y con este paso dejó libres

4 los de Guanajuato, y otros puntos para moverse sobre nos.

otros como en efecto lo verificaron en número muy enperior

al nuestro.

Dia 15—En Ciénega de Mata.—Se recibió correo de

Aguascalientes, con conmnieaciones del Gobernador, de Qui-

roga y de Sánchez Román.—Se propone a Hinojosa que to-

me el mando de las fuerzas que los acompañan, y con las su-

vas emprendan operaciones sobre Tagos, León y Guanajuato.

Hinojosa escribió a Zuazua, y yo hice lo mismo sobre la ma-

teria. Hinojosa se resolverá al recibir la contestación de Zua-

218. A Degollado lo acompaña Traconis, y en caso de darle

O Biblioteca Nacional de España

MEMORIAS DE LA GUERRA DE REFORMA _

el mando de alguna fuerza, esto cansáría el mayor disgusto

que tendría quizá consecuencias fatalísimas,

Día 16-—Bp Ciénega de Mata.—Se asegura que el mocho

ha llegado a Lagos. Salió correo esta mañana para San

Lnis; con ansías aruardamos la contestación de Znazua.—El

enemigo ha ocupado la plaza de San Telipe, y los nuestros no

se mueven.—La falta de actividad nos pierde en cualquier

descuido.

Día 17.—Eu Ledesma—Auoehe desertaron 11 oficiales de

infantería con el achaque de irse a San Luis, a presentársele

al Sr. Degollado —Esta mañana se recibió correo de San

Taiis, con el ofeio de Degollado, para que se reconozen

a Don Manuel Doblado como General en Jefe de la brí

gada de Gnanajuato.—D. Franciseo Berduzco, eontinña

de Gobernador interino del Estado—De esta manera se evi-

tó el atropellamiento de los derechos de este señor, quien

siempre se aprovecha de la elaboración de pasteles—Salió

Hinojosa esta tarde para Aguascalientes, acompañado de

su plana mayor. Se ha resuelto por el Sr. Degollado no

presentar acción formal mientras no tengamos la artillería

necesaria para hacer frente al enemigo, y se hostilizará al

enemigo por medio de brigadas ligeras que se organizarán

con ese fin.

Dia 18—En Ledesma—Nada de nuevo, y continuamos

en espera de órdenes—Este perder de tiempo nos hace da-

ño bajo muchos aspeetos.

Dia 19.—En Ledesma —Según informes, los de Lagos se

han salido como también los de León.—Quiroga escarmentó

a las Acordadas de Lagos, huciéndoles algunos muertos y

heridos. Dos de los de Quiroga salieron heridos. Continua-

mos en la maldita inercia que tanto nos perjudica.—La tro-

pa y oficiales se desesperan.

O Biblioteca Nacional de España

Le mIANtO DEL CONONEL VALDES

Día 20—En hedesma.— Volvió Hinojosa de Aguasea-

lientes—Blanco leva ordev de Degollado para arrestar a

Quiroga y a todos sus oficiales, tomando él el mando del re

gimiento.—Esta insubordinación de Quiroga ha sido escan-

dalosa.

Día 21.—En Ledosma.—Llegó el Ter. regimiento de rifle

vos, que mandaba Quiroza.—Quiroga, el Mayor del regimien

to y otros oficiales xalieron para San Faris, acompañando a

Blanco, vau arrestados y contestarán a los cargos de ineu-

bordinación, ete. proferidos contra ellos por Zuarna.—La

oficialidad del regimiento se queja amargamente de la con-

dneta de Znazna, Vidaurri y otros. Me ha Tamado la aten-

ción lo que me han contado de la conducta observada por

Zuazna y Vidanrri en la distribución de los miles de pesos

que de Guanajuato se Nevó Zuazua, en Mayo pasado.

Día 22.—En Ciénega de Mata.—De Ledesma salió el bata-

llón de Aguascalientes, para aquella cindad.— Los viñeros

que ahora continnarán incorporados en mestra brigada, y

Tilanco, se incorporarán mañana, como también el Sr. Dobla

do, que esta noche pernocta en Ojuelos—Al llegar mañana

el Sr. Doblado, algo sabremos de las operaciones que esta

brigada emprenderá.

DIA 23.—En Ciénega de Mata-—Anoche Hegaron Hlaneo,

Quiroga y otros Jefes del Ter. regimiento de rifleros. Ann

mí primo Miguel, xe halla disgustado con Ja política de Vi-

danrri y Zuazun—Es evidente que ya no tienen ni la mitad

del prestigio-que antes de ahora han tenido entre los nues-

tros.—En locas, Znazna quiso seducir a la tropa para que se

retiraran a. Nuevo León y Coamila—Vidanri, de Vanegas

<e volvió para Monterrey. — Llegó el Sr. Degollado acom-

pañado de un nímero considerable de las hijos de Guannjua-

to—Todos nrán los mayores esfuerzos para levantar nue-

vas feras—Al avanzar Traconis con la brigada de San

O Biblioteca Nacional de España

MEMORIAS DE LA GUENIA DD REFORMA 1

Luis sobre San Felipe, los mochitos abandonaron aquella

plaza.

Dra 24.—En Ciénega de Mata.—El. Sr. Doblado me ha da.

do la comisión importante de ir a Monterrey, y en su nom-

bre ver al Ni, Armberrí, para que este señor venga a Gua-

najuato y preste sue servicios. Llevo cartas para el señor

Vidanrri con el mimo asunto, y otra firmada por muchos se-

ñores de Guanajuato, para que el Sr. Aramberri venga.—Tle-

vo encargo especial de ver en San Luis al Sr. Degollado,

para hacerle presente en nombre del Sr. Doblado, cuál ha

sido la conducta excepcional de Ortega y Sánchez Román,

de Zacatecas.

Dia 25,—En Gallinas—Salí tenprano de Ciéneua de Ma-

ta, y de paso vi en Ojuclos el regimiento de Quiroga, que

aguarda órdenes—Como a las 6 de esta tarde me alcanzó

un extraordinario del Sr. Doblado, que va para Sau Tuis,

Día 26—En San Luis Potosí.-—Llegué como a las 1% del

día.—En el camino me encontré con Quiroga, Alvarez y

otros que marchan a incorporarse a la brigada de Guana-

juato—La dificultad que Quiroga tuvo con Zuazua, se arre-

gló satisfactoriamente.—Presenté mis cartas, y me acuesto

pensando en la inmensa chismografía que eirenla como suce

de siempre donde está D. Santos Degollado,

Día 27,—Pn San Tuis—Ayer salió el Se. Berduzco para

San Felipe, y entregué sus cartas a Doña Agrípina, quien me

ha dado muchos pormenores de las intrigas que traen en

manos para falsear la revolución—Martín Rul y Talancón

fueron los dos comisionados que en nombre de los Goberna

dores de Zaentecas y Michoacín fueron a Vernernz reserva

demente para poner a Juárez al tanto de la conducta de

Dezollado.—El Sr. Doblado vo fué nombrado por cl Go-

herno Constitucional, General en Jefe de las fuerzas de Gua-

O Biblioteca Nacional de España

176 DIARIO DEL CONONEL VALDES "

najuato, sino por D. Santos, y este señor lo hizo ereyendo que

Doblado lu sostendrá para Presidente. En esto llevará

chasco-—Megó Escobedo anoche, y Blanco sale mañana para

San Francisco y Trancas—A Zaragoza le dejó Zuazua el

mando del Ejército del Norte. .

Día 28—En San Luis —Salió Blanco para Trancas y San

Franciseo—El dinero que sacó Zuazna para Guanajuato,

probó ser la manzana de la discordia causando las desave-

nencias de Zuazna, Ortega, Quiroga, Guadalupe García y

otros.

Dis 29.—En el Maguey.—A bueva hora salí de San Luis

en unión de D. Pepe Jajá, del comercio de Monterrey —Mu-

cho importa llegar cuanto antes a Monterrey para desem-

peñar la comisión que el Sr. Degollado me ha confiado,

Dia 30.—En Solis —A la vista de esta Sierra está el cerro

de la Sierpe donde fué hecho prisionero D. Anueleto de la

Rosa, en Febrero de este año.—D. Anacleto era uno de los

más fieles defensores de la Constitución de 1857.—Fué pasa

do por las armas en la Hedionda por el traidor Tahouda

titulado Coronel del Gobierno de Burlas en México.

Día 31.—En el Cedral.—Después de descansar unas enan-

tas horas en el Matehuala, llegamos a este mineral en euros

suburbios a principios de este año Quiroga derrotó a Cuazo

Joaquín. Hasta las mujeres y muehaehos tomaron parte

contra los pobres “mochitos”—La derrota fué completa y

todo perdió el enemigo menos el Mosquito, que era una pieza

que habían dejado en Matehuala distante 5 leguas de aquí.

Sueranae 1%—En San Salvador-—legamos como a las

$ de la noche, habiendo salido del Salado, como a las 5 de

Ja tarde.

Dis 2—En Agua Nueva.—Temiendo que los indios nos

salieran entre San Salvador y esta hacienda, salimos ya tar

O Biblioteca Nacional de España

— MEMORIAS DE LA GUERRA DE REFORMA — TO

de y llegamos como a las dos de la mañana de hoy 3, sin no-

vedad.

Día 3.—En el Saltillo. —Después de hacer alto en Buena-

vista, llegamos a las 11 a esta ciudad.—En el ueto escribí al

Sr. Aramberri, poniendo en su conocimiento el objeto de mi

viaje a Monterrey—Después visité a multitud de mis pa-

rientes y amigos.—La venida de Zuazua ha causado una clis-

mografía asombrosa.

Dia 4.—En el Jaral.—Salí a las dos de la tarde del Sal-

tilo acompañado del indio negro Juan Cuballo y algrmos de

sus compañeros.—Yos llovió mucho.

Día 5.—En la Fábrica—Ya tarde legué a ésta sin no-

vedad.

Dia 6.—En Monterrey —En la Rineonada encontré a los

Sres. Aramberri, Gómez y Tano, ayer, que salían expulsados

del territorio del Tsstado por orden de Vidaurri. Para cuan-

do Negaron a la Rinconada, una orden del Sr. Vidaurri

aguardaba al oficial que los conducía para que devolviera el

pasaporte de Aramberri, y permitiera que este señor regresara

a sn cusa—Aramberri continuó a su hacienda y me aguar-

dará en Matehuala.—Te entregué las cartas que traín para

él.-—Me encuentro con que el St. Vidaurrf la dudo orden pa-

ya que las Merzas del Estado en el interior, xe retiren a este

Estado.

Día 7—En Monterrey.—Se publicó una proclama de Vi

danrri, en la que pretende justificar el decreto que retira del

interior al ejército del Norte—Se circuló manrscritu wa

orden, para que a los soldados de Quiroga sc les trate como

traidores.—Asombro causa lo que está pasando aquí en ma-

terias de Gobierno.—Este año no ha habido elecciones,

Día 8.—En Monterrey. — Todos aguardan los resultados

de la orden dada por Vidaurri, para que el ejército del Norte

n

O Biblioteca Nacional de España

E DIARIO DEL CORONEL VALDES

se venga de lo interior.—En el teatro hablé esta noche con

D. Juan Zuazua, quien culpa a Berduzco, a Remírez y a

Cruz-Acdo, en partieular por las desavenencias del día—

Culpa igualmente a los Gobernadores Ortega, de Zacatecas,

y a Chávez de Aguascalientes

Dia 9—En Monterrey —Anoche llegó Zaragoza, y por

ejerto que no está de acuerdo con lo que Vidaurri ha hecho

para que las fuerzas se regresen al Estado—La medida la

condenan los más de los hombres pensadores.—Zuazua me

dijo esta noche en el teatro, que Degollado le ofrecía a Vi-

damrri el mando en Jefe, y exigía aquél, Zuazua, regresar al

cuartel general para ser juzgado (sic).—No salí hoy para el

Saltillo, aguardando a Zaragoza, que esta tarde quedó de

verse con Vidaurri—Llegó de Nadadores, mi hermano 1a-

yor D. José Luis, y no desea establecerse al lado de mi her-

mavo menor, Timoteo.

Día 10-—En Monterrey.—De la entrevista de Zaragoza

con Vidaurri, resulta que Zaragoza se vuelve con el objeto de

traerse el ejército del Norte.—Estoy vitado por Zuazua, para

tener una entrevista con Vidaurri mañana a las 7 de la ma-

ñana. Ya sabremos sí penetro cuáles sean las verdaderas ju-

tenciones del St. Vidaurri. -

Día 11—En Monterrey. —Me vi con el St. Vidaurri esta

mañana, y le expliqué las razones en que me fundaba para

creer que en el Sr. Doblado se podía poner confianza—Mv

contestó que ya le escribía al Sr. Doblado, quien tarde le ha

bía escrito, pero que sin embargo, si este señor le remitía

una gruesa suma de dinero, en tal evento él, Vidanrri, mo-

vería sobre el interior 4 0 5,000 hombres y 4 baterías —Vi-

daurri cree que una dictadura progresista es la que el país

necesita para que nos dé Códigos e introduzca otras mejoras

que las ciremstaneias y el bien general demandan—ale-

eu que él no aspira a ningún puesto, y que no sabe a quién se

O Biblioteca Nacional de España

MEMORIAS DE LA GUERRA DE REFORMA 1

le puedan dar facultades omnímodas.—Se expresó con bastan

te desprecio contra Juárez, Prieto, Degollado, Ramírez, Or-

tera, y otros de menos categoría, aunque no me dió las

razones en que se fundaba para despreciar a todos estos se-

fores—Dice que él y el Sr. Doblado, en asuntos de política

se podrán entender al presentar en campaña una fuerza que

el enemigo 10 pueda resistir.—En fin, las opiniones del señor

Vidaurri por ahora, eamsarán el defecto de convertir en ene-

migos suyos, muehos de los principales señores que Aguran

al frente del partido puro—Aun aquí mismo, es claro que

su política últimamente le ha enajenado Tas simpatías de mul

titud de personas que antes de ahora lo hubían sostenido y

defendido.

Dis 12—En la Rinconada. — Me alcanzaron Zaragoza y

Pancho Aguirre —Zaragoza vada consignió con Vidamri

para que éste diera contraorden respecto del lamamiento

que se le hace al ejército del Norte.—Es evidente que ni aúr

Zaragoza está por esta medida. .

DíA 13.—En el Saltilo—Fsta mañana pasó por aquí Pe

aro Hinojosa, para Monterrey.—Va por la costa con el obje

to de ver a Vidawrri, y desde ahora pronostico que nada con

segnirá.—Hegaron de San Luis, Padilla y Pedro Castañeda,

El decreto de Vidanrri retirando del interior nuestras fuer-

zas, ha causado mucha sensación.

Dis 14—En el Saltillo—Salió Zaragoza para San Luis

Muchos de los del ejército del Norte han pasado hoy para

Monterres.

Día 15.—En el Saltillo.— Se recibió aquí el Boletín de

Monterrey, con las comunienciones de Degollado y de Vidan

rri—Es evidente que la opinión muy marcada se declara er

favor de Degollado.—En la madrugada de hoy recibí carta

de Hinojosa, quien viene con licencia por un mes—El de

O Biblioteca Nacional de España

180 DIARIO DEI CORONEL VALEN

creto de Vidaurri, para que el ejército del Norte se retire del

interior, será la muerte política de este mandarín.

Dra 16.—Banticé un niño de Timoteo-—En Agua Nueva

En Nuenavista encontré al 17 y 27 escuadrón del 2 regi

miento de rífleros. Son unos 150 hombres cuando mucho, e

iban con el aventurero guebupín Santafé—Por un momento

me encontré con Zaragoza en el Saltillo y aquí he sabido que

lleva orden de Degollado dando de baja a Videnrri, y nom-

bando a Pepe Aramberri en su Ingar—Zaraguza se ME de

paso y llegaría esta noche a Monterrey. Hermoso 16.de Sep-

tiembre para Vidaurri, y el hombre probablemente dejará

de figurar en la política de México antes de muelos días—

Salió de cobre muy ordinario.—Lo único que se necesita

para mulifiearlo es, que Degollado se mantenga frme.

Dia 17.—En Jess María.—Encontramos unos 4 indivi

duos del escuadrón de Quiroga, y el de Lampazos—No les

desagradó la noticia de que Vidaneri había sido dado de

haja —Es menester advertirle al Sr. Degollado, que Vida

vi y Zuazua cuentan con Coronado para cuanto sc les antoje

hacer.

Dra 18—En e) Saltillo.—El lunes pasado hubo st motín en

Zuentecas, contra González Ortega, Lo acandilló mi antigno

amigo el Lic. Talancón.—Márqnez, que con 3,000 hombres

había salido de Guadalajara para atacar en Atenquique a

Ogazón y Rocha, se volvió sín emprender ningnna operación

militar. — En México tienen sus fuertes desavenencias los

amigos de la conserva:—El pelidito Miramón Tes ha colma-

do el plato.

Dia 19—En el Cedral—Encontré a D. Francisco Vene-

gas que irá para Monterrey, comisionado por el Gobernador

de Aguascalientes, para agenciar armas con Vidaurri.—los-

to es ir en busea de evervos nácares—Dios dé mejor agua a

los buenos habitantes de este mineral.

O Biblioteca Nacional de España

— NANORIAS DE LA GURIRA DE REFORMA 161

Día 20.—En el Reposadero.—Se asegura que Rocha y Oga-

zón derrotaron a Márquez en Atenquique,— El gachupín

Santafé, de paso por Vanegas, mandó dar palos al dueño de

aquella hacienda, D. Alejandro Agnirre—aguirre es hom-

bre muy decente y ha prestado buenos servicios a la cansa.—

El hecho infame ha causado la mayor sensación.—Esté San-

tafé fué por todo el tránsito cometiendo los mayores aten-

tados. Es bandido y ladrón —En Matehuala, al saber este

foragido que Vidanrri aprobaba de su deserción, repicaron

las campanas y gritaron que muriera Zaragoza.

Dia 21.—En el Charquillo.—Se confirma la derrota del

asesino Márquez, por Ogazón y Rocha-—También la toma de

Tepic por las fuerzas de Coronado.

Día 22—En la Mantequilla—Ya noche llegamos a este

rancho miserable y mañana Negaremos a San Tuis,

Día 23.—En San Luis.—Mo vi con el Sr. Berduzco y con

Doña Agripina.—D. Franciseo me puso muy al tanto de las

intrigas que han motivado la eolocución de ciertas mlidades,

que son un perjuicio para la causa.—De paso vi ayer a Gui-

Nermo Prieto, con quien quedé de hablarme mañana a las 7.

Me he encontrado con muchos de los tamaulipecos que se

hallan en esta plaza; entre otros con el jefe de ellos, Guada-

pe García. — Uno que otro díscolo entre los oficiales de

Blanco, ha querido causar su motincito, y el resultado ha

sido que con aprobación general de la ofielalidad, han sido

remitidos a este enartel general.—Consecuencias del decreto

atroz que dió Vidanrri, mandando que el ejército del Norte

se retirara del interior.

Dia 24.—En San Tais.—Me vi con los Sres. Degollado,

Prieto, Nerduzco y otros.—Eveuentro al Sr. Degollado re-

suelto a sostener las providencias que dictó contra Vidanrri,

quien a su vez ha publicado un decreto y eirentar que indican

O Biblioteca Nacional de España

1. DIARIO DML, CORONFL VALDES —

demencia-—Preribí al Sr. Doblado, dando cuenta de mi viaje

a Monterrey.—Se confirma Ja derrota, aunque parcial, que

sufrió el asesino Márquez.—Por la línea de Veracruz avan-

zan, y las cosas se presentan bajo un aspecto favorable,

Dis 25—En San Luis.—Hoy llegaron dos correos de San

Felipe y el Sr. Degollado al recibir el último de ellos salió

para San Felipo.—Hay sus disenciones en las filas, y de nue-

vo se habla en ciertos efrculvs de que se confecciona un pas-

tel con elertos agentes del Gobierno del clero—Par desgracia

implica al Sr. Doblado, y semejantes especies lo perjudican.

Se corre la voz de la venpación de Querétaro por fuerzas

Niberales, como también que el asesino Márquez, viene de

Gmadalajora por el Bajío—En tal caso lax operaciones mi-

litares xe reducirán al Tajío.

Día 26.—En San Tais—Algunos disgustos entre Traco-

mis y Doblado, motivaron el viaje del Sr. Degollado a San

Felipe.—Los que están al tanto de lo oeurrido culpan a Tra

conig-—ueho se habló hoy de la prisión de Vidanri.—Carva-

jal; José María J., también vendrá de la frontera con fuerzas.

Algunos de los que rodean al St. Doblado, motivaron los dis

gustos entre los de Zacatecas.

Día 27.—En San Tuis.—Se celebró el día de hoy con has-

tante entusiasmo.—Regresó el St. Degollado, de San Felipe,

habiendo arreglado satisfactoriamente los disgnstos habidos

con Traconis.—Las fuerzas de San Luis con las de Blanco,

forman la división del Norte, y el mando en Jefe se le dió

a Miguel Blanco, D. Santiago Tapin de Mayor General.—La

división del Centro a la que yo pertenezco, estaba aver en

Lagos, y Woll se replegó a León. Las fuerzas de Blanco es-

tán en San Velipe, y en enalquier descnido los echamos fuera

de (manajuato a los de Woll

Día 28—En el Tepetate—Dexde las 12 salí de San Luis,

habiéndome despedido de los Sres. Degollado, Berduzco, Do

O Biblioteca Nacional de España

MENORIAS DE LA GUERRA DE REFORMA 193

ña Agripina y otros amigos. — Se dice que los pueblos de

Huajuco y Montemorelos continaban fieles a Vidawrri

Día 29.—En Nana Angela—Ayer salió de Lagos la divi

sión del Centro, y esta noche pernocta en Matanzas, unas 3

leguas de esta hacienda —Encontré a unos cuantos de Ta-

maulipas que regresaron a San Luis.—Ayer salían de San

Tais, las piezas de Tamaulipas para Ríoverde con el fin de

perseguir al renccionario Saldívar, que había penetrado a

Ríoverde, cometiendo atrocidades.

Día 30.—En el Vaquero—Esta mañana me encontré con la

división del Centro y mañana llegaremos a San Felipe.—Me

encuentro con el Sr. Doblado, lleno de fe en el porvenir.—

Con esta Mmerza y la de Blanco, algo de provecho se empren-

derá.

Ocrrnar 1,—En el Vaquero—De esta hacienda regresó la

fuerza a Ojuelos, y el St. Doblado me envió a San Pelipe

con comunieaciones para Blanco. En San Felipe encontré

Al Coronel Seguín y a varios otros jefes amigos.—Se recibió

oficio del cuartel general, del restablecimiento del orden en

Monterrey, destituyéndose a Vidanrri, y el Estado recono-

ciendo a Aramberri como Gobernador y Comandante Ge-

neral del Estado. Con silbidos terminó la vida política de

Santiago Vidanrri, que no hace mucho creyó que sería, al ter-

minar la presente Ineha, árbitro de los destinos de México.

El hombre no merece ai aun la compasión de los que desean

el bien general de los mexieanos. ¡Que duerma en paz!

Dia 2—En Ciénega de Matu.—Aquí alcancé al Sr. Dobla-

do con la división del Centro—aAyer salieron Jas fuerzas de

Blanco para el Jaral, quedándose en San Felipe el Coronel

Segnín con los rifieros.—Este movimiento se emprendió por:

que se desenbrió que la pÓl..........e.eeeeee!

1 Asten el origina, A. M. €.

O Biblioteca Nacional de España

e DIARIO DEL CORONEL VALDES ———

el enemigo continúa en sus posiciones de León, Silao, Tra-

punto, etc. — Con ansias aguardamos noticias de Guadala-

jara.

Día 3.—En Ciénega de Mata-—Esta tarde se movió la ca-

ballería a la Troje—Llegaron varios correos y exploradores,

Márquez, con dos mil hombres vino de Guadalajara hasta

San Juan de los Lagos, para recibir la conducta que Severo

Castillo traerá de México a Guanajunto.—Woll y otros, con

las fuerzas de Guanajuato, se moverán sobre San Luis el día

$ del corriente—Ya veremos lo que se hará para impedirles

el paso.

Dias 4 y 5.—Se pasó revista de Comisario en Ciénega de

Mata.—Se recibió impreso el parte de Aramberri, y dice que

pronto se organizarán fuerzas para reforzar a los rifleros en

campaña.—En Tecuán—Nada de muevo—El Sr. Doblado,

en contestación me dijo esta noche que Payno, Siliceo Ma-

muel y Zuloaga, habían estado por el golpe de Estado de Co-

monfort; y que él, Fuente, Jan Antonio y Bernardo Flores,

se habían opuesto.—Que Puyno, confiado por el clero había

fascinado Comonfort, y tenía la eulpa de que éste nos en-

tregara en manos de la reaeción.— Que la entrevista duro

desde las 3 de Ja tarde bastarla 15 de la mañana; Comonfort

10 más oyendo lo que todos ellos decían e insistiendo en que

en contra del clero no prevalecería el partido liberal, Esto

sueedió cuando la reaceión era vencida por todos lados, y

unos dos meses antes de la traición de Taenbaya.

Dia 6.—En la Villita.—Antes de llegar la división esta

mañana, la caballería que había llegado a esta Villa desdr

ayer, tuvo un encuentro con el enemigo que en número de

90 infantes y 100 y tantos cabellos, salió anoche de San

Juan de los Tagos a las 11 con el fin de sorprender a los

nuestros —Los fuegos duraron más de una hora y el enemi-

go sufrió una completa derrota.—Se le mataron unos 10 y

O Biblioteca Nacional de España

— auMONIAS DE LA GUNBRA DE REVORMA 185 —

se Je hicieron 20 prisioneros, siendo de este número un cabe-

ellla de niguna nota, amado Félix Alva, a quien probable.

mente se le aplicará Ja última pena.—En el encuentro de hoy

el enemigo se dispersó para mejor ponerse a salvo.

Dra 7—En San Juan de los Tagos—La poca fuerza ene

migu que estaba ani, se retiró tomando el camino de Jalys

al aproximarse los nuestros —La población está en decaden-

ela, y acabaría a buen seguro de su eriminal fanatismo (sic)

que la priva de la feria anual que ha disfrutado antes de

ahora, La mayor parte de las mejores fineas en esta población

pertenecen a la Virgen, de modo que mestra Señora de Son

uan, en bienes temporales, es la más rica de esta Villa—

Los padreeitos no entenderán mucho de lo que es la verda-

dera religión, pero en esto de buscar pesetas no le piden fa-

vor a vadic—Se dice que el asesino Márquez salió de Gna-

dalajara para Colima, destacando otra fuerza xobre Tepic.—

Pronto sabremos el resultado,

Día 8.—En San Juan de los Lagos. —La chusma que al lle-

gar nosotros ayer se retiró per el camino de Guadalajara,

está en Talos, y no se emprende ningún movimiento esta no-

che contra ellos porque la caballería está muy maltratada.

Dia 9.—En San Juan de los Lagos.—La diligencia que lle-

26 de Guadalajara, confirma la salida del asesino Márquez,

para Colima, el martes de esta semana.—Pronto tendremos

de Zacatecas dos baterías de primera elase; 6 de a 12 refor

zadas, 4 de 24 y 2 de a 36, piezas todas de batir.

Día 10.—En San Juan de los Lagos—Se recibieron co-

reos de San Luis.—Vidanrri, en política, fué enterrado cu

Monterrey el 25 del próximo pasado—Ahandonó el Poder

con la ninguna dignidad que permitió que en el cieno de

Almaluleo se enterraran las glorias del ejército del Norte—

El término de la vida pública de Vidanrri, podría servir de

O Biblioteca Nacional de España

e PIANO DEL CONONEL VALDES

lección a todos los del Poder, euando infatuados abandonan

Tos intereses de los pueblos a cuya sombra se han elevado—

Cirennstancias excepcionales elevaron a Vidaurri como a

Zuama, y ninguno de ellos recnperará el terreno que per-

dieron bárbaramente—Concluirán sms días jugando malilla

y riéndose de los abusos que cometieron enando tuvieron el

Poder—Vidaurri no merece que se compadezca de él nin

gún hombre de corazón y patriotismo.

Dra 11—En San Juan de los Tagos—Vegetando y aguar-

dando noticias del enemigo.—Se enviaron unos 70 fusiles a

Aguascalientes.

Dí 192—En San Juan de los Tagos—El asesino Már-

quez regresó a Guadalajara el Tes de esta semana, sin

emprender ningún ataque contra Rocha y Ogazón.—Se ase-

enraba ayer en Guadalajara, que los de Coronado habían

derrotado completamente al bandido de Alica, Lozada, y que

su cabeza la habían pasado por las calles de Tepic en una

pica. Cuando igual cosa les suceda a los que están al frente

de la fuerza llamada Gobierno de la capital, México se pon-

árá en el sendero de la verdadera civilización.

Dr 18.—En San Juan de los Lagos—Ayer salieron los

mochitos de León a recibir en Silao la conducta que va para

Guadalajara —Falta saber lo que harán con la tal conducta

y como es muy probable, el asesino Márquez no viene de

Guadalajara a Tagos a recibirla.—Lo que parece más segu

yO 08 (ne los comerciantes de México y Guanajuato han sida

chasqueados por el Gobierno de hurlas en México—Ya vere-

mos dentro de tres o cuatro días.

Dia 14.—En la Vilita de la Tencarnación-—Escribt a Lla-

10, D. Manuel Maria y Aramberri, felicitándolos, ete—IEu-

genio Gareía se fué y dejó mis carias—La caballería de

Márquez pernoetó anoche en Tepatitlán, y vienen a recibir

O Biblioteca Nacional de España

MEMORIAS De va GUEIRA DE REFORMA — 187

la conducta que traen de Guanajuato a Lagos.—Le acom

paña a los titulados Generales Zires y Tapia, Luis, con 2,000

hombres de las tres armas (sic).

Día 15—En Aguascalientes. — Aquí tiene ya unos 200

infantes y se aumentarán a unos 400 al recibir las armas.—

Al nlir nosotros, esta fuerza se agregará a nuestra división

Dis 16—En Aguascalientes. —El usesino Márquez per.

noctó anoche en San Juan de los Lagos y mañana probable-

mente recibirá la conducta en Lagos. — Un socio del Club

Progresista pronunció un discurso en el hermoso jardín de

esta eindad.—Todos los domingos pronuncia algún disenrso

alguno de los socios de dicho Club, y las ales arengas parti

cipan del rojismo de los principios. —La eahallería salió a

Peñuelas esta tarde.—BSirve de punto avanzado en observa.

ción del enemigo.—El Dr. Bants me presentó a su muy inte-

resante señora, quien es hija de esta ciudad. El doctor es el

Cónsul de los Estados Unidos, aquí.

Dix 17.—En Aguascalientes —Esta noche habrá llegado

Wall con la conducta de San Juan de los Tagos, y Márquez

la conducirá a Guadalajara —Se asegura que Woll, con la

fuerza que trae, se vendrá de paso para esta cindad y para

Zacatecas —Lo hará al mismo tiempo que Vélez, de Guana

juato se mueve sobre San Luis.—A penas es creíble que une

dan ejeentar estos movimientos con buenos resultados—

Por falta de recursos no emprendemos los movimientos que

los planes del enemigo nos indican,.—Esta tarde llegaron de

San Luis 95 rifleros,

Dis 18—En Santa María.—Antes del amanecer se dió el

primer toque de marcha, y esto causó alguna alarma gene-

ral entre los buenos habitantes de Aguascalientes —Se ase-

emra que el enemigo en dos secciones respetables por a nú-

mero, avanza simultáneamente sobre San Luis y Zuentecaa,

O Biblioteca Nacional de España

168 DIARIO DEL COMONEL VaÉnES

y si en realidad así sucede, bien podrá ser que los hagamos

retroceder con amenazar directamente las plazas de Gua-

majuato y León.—Cuando la mayor parte de la fuerza s*

puso en marcha, los ríferos y la caballería continuaban como

punto avanzado en Peñuelas.— Como muestra salida de

Aguascalientes (sic), muehísima gente también xe salió en

el acto de la ciudad, huyendo de los hombres de las Garantías!

Ts de desearse que el enemigo emprenda las operaciones que

se nos asegura que emprenderá.

Dis 19.—En Ciénega Grande—Los rifieros y la caballería

cubren nuestra retaguardia, y aun no sabemos de punto fijo

cnáles sean las intenciones del enemigo.

Dia 20.—En Tule.— Se recibió orden para que contra-

marchara la fuerza a Aguascalientes, y al llegar a Santa Ma-

ría se recibió nueva orden para que se devolviera porque a

las 3 de la tarde el enemigo muy superior en número al mues-

tro, comenzaba a entrar en Aguascalientes —Mañana sabre

mos si va para San Luis o Zacatecas. En las eirennstancias,

para nosotros el tiempo es todo—De México se mibe que

Ponciano Arriaga, comisionado por el peladito Miramón.

había salido para Veracruz, para entrar en convenios con

el Gobierno de Juárez—Apenas se puede creer que conse-

guirá su objeto. Toda transacción en las actuales circuns

tancias es imposible.—El lunes de la semana entrante llegó

la infantería de Tamaulipas y una batería, además del ar-

mamento.—Blanco se movió antier sobre San Mignel Allen-

de—De aquel punto se amenaza a Guanajunto, Celaya y a

Querétero.—Vidaurri y Zuazua han salido de la República,

según las noticias que de Monterrey se recibieron y que a

canzan al día 9.

Dia 21—En el Agostadero—El enemigo continuaba en

Agnascalientes y los exploradores han quedado malísima-

mente. Añn no sabemos a punto fijo el número del enemigo.

O Biblioteca Nacional de España

MEMORIAS DE LA GUERRA Dit REFORMA 160

Llegaron de San Tuis, Maya, Anda, D. Francisco y el licen-

ciado Bravo, D. Andrés. — Se incorporaron esta noche las

fuerzas de Aguascalientes.

Dis 22—En San Nicolás de los Quijos—T enemigo an

tes de entrar en Aguascalientes, envió por delante oficiales

para prevenir a los habitantes que los recibieran con repi

ques a vuelo, cohetes, cie—Amn no sabemos vi nos seguirá

o irá para Zacatecas como muehos xnponen, y Él mismo lo

asegura. Extraño será si no se vuelven de (Zacatecas),

Agttascalientes a Guanajuato.—Aver probablemente salieron

$00 hombres de San Luis.—Estos amenazarán por el Rineón

de Ortega a Guanajuato.—En menos de 10 días algo de mu-

cho interós xe habrá hecho.

Día 28.—En la Palma, — Muchos tomaron el enmino de

Gallinas a la vez que el grueso de la División se movía rum-

bo opuesto para el camino de El Carro—La consecuencia

«me fuimos a dar a Pinos un gran número, inclusos los en-

fermos, los aposentados y un número inmenso de mujeres y

oficiales sueltos y extraviados de ans cuerpos.—La División

pernoció esta noche en la hacienda de los Angeles, y los de

Asnascalientes en el Carro—Muehos de los extraviados se

quedaron en Pinos y otros en los ranchos cerca de este punto

Día 24—En la Noria de Angeles—Nada de muevo, aun-

que <e corre la voz que Blanco entró a Guanajuato, y que

el titulado Gobernador Vélez la evacuó, tomando el camino

de la Puerta de San Juan para Guadalajara. —Los de Aguas-

calientes y los rifleros están en el Carro.

Día 25.—En la Pendencia.-—Salf de Noria de Angeles pa-

ra presentarnos al enartel general en San Luis Potosí.—El

enemigo continuaba en Aguascalientes, aunque se asegnraba

que hoy saldría para Zaentecas,

Dis 26.—En la Parada.—En esta noche hace 3 meses que

O Biblioteca Nacional de España

190 DIARIO DEL CORONEL VALDES

dormía yo en esta hacienda.—Ayer hizo 3 meses que comen

26 la célebre batalla de Ahualico a mas 3 leguas de esta

hacieuda. — Acción memorable, que puso eu evidencia la

ineptitud de Vidaurri y de muchos otros enyas reputacio-

nes usurpadas tanto han perjudicado al partido del pueblo.

Ta derrota del ejército del Norte comenzó entre las 11 y 12

del día 24 de Julio del año pasado, que D. José 8. Aramberri

por orden terminante de Zuazua evacuó la plaza de Guana-

juato, dejando la entrada libre al peladito Mivamón, que de-

rrotado venía de Atenquique para México.— La derrota se

consumó el 29 de Septiembre —Blanco derrotó una fuerza

enemiga en las inmediaciones de San Miguel de Allende.—

Aquí me encontró un extraordinario con la noticia de que

se le conmnica-a Doblado.

Día 27.—En San Luis—Aniversario del asalto de Gua

dalajara, Octubre 27 de 1857, noche que nunca olvidaré poz

os horrores que pasaron por mi vista—En la acción del 22

del corriente, que los de Blanco tuvieron con el enemigo en

el puente de Calderón, Mé muerto el célebre bandido y axesi-

no Felipe Villanueva, que era el más activo de todos los rene:

cionarios en Guanajuato. Era hombre horriblemente malo.—

Woll se fué para Zacatecas, y la División del Centro, por

Ojuelos, avanza sobre Tagos y León, a la vez que Blanco en

San Miguel amenaza a Celaya, Querétaro y Guanajuato.—

Otras de nuestras fuerzas bajo el mando de José Justo Alva-

rez, por el Rincón de Ortega, amenazarán a Guanajuato.—

Fan venido ya unas dos comisiones de la capital, del peladi-

to Miramón, buscando un avenimiento—Dios ilumine a los

que están al frente de la causa del pueblo, para que contes

ten que el cáñamo los agnarda —Cruz Aedo se ha ido a Du-

rango de Comandante Militar. Jíalo está cs0. y ya sc descu-

brió la incógnita.

Dia 28.—En San Luis —Por motivos que ignoro, el señor

Degollado me dió mí licencia absoluta, previniéndome que

O Biblioteca Nacional de España

MMMORIAS DE LA GUERRA DE REFORMA a

marche a Monterrey sin ninguna investidura militar.—Ya ve-

remos lo que haré. — Se celebró la toma de Guadalajara,

pues según cartas, parte de la guarnición se pronunció con-

tra el asesino Márquez.—De oficio nada se sabe.—Llegaron

de Tamaulipas Junguito, Balbontín y otros.—Salieron los de

Tamaulipas para San Felipe, y mañana saldrá Gómez Fa-

ríus, Benito, para tomar el mido de ella —; Madre de Dios!

Cuánto se ve en este mundo.—A Hinojosa se le prorrogó su

licencia por un mes más,

Día 29-—En San Luis—Salió Gómez Farías a tomar el

grando interino de los que están en San Felipe—Berduzco

también salió para Sau Felipo—El Sr. Degollado se negó a

ofrme, y ni siguiera me diec de qué se me ucusa. — Mucha

equidad.—Ya veremos.

Día 30.—En San Luis.—Se confirma la noticia de la eva-

cnación de Guanajuato por Vélez, como también la ocupa-

ción de Zacatecas por Woll, el 27 y 28 del corriente—Dobla-

do pernoctaba esta noche en Lagos y Blanco estaba en la

Venta.—Aquí tenemos muehos oficiales permanentes que co-

mo moscas rodean a los del poder para aprovecharse de los

servicios de otros.—Cuando lo puedan hucer sin las proba:

bilidades de vérselas con el enemigo.

Dia 31,—En San Tuis—Ta caballería del centro sorpren-

dió al enemigo que en número de 200 hombres estaban en

Lagos, y entre los muertos se cuenta a Máximo González.—

Vélez había regresado a Guanajuato y se ealeula que hoy

los nuestros amenazarían a aquella plaza por tres diferen-

tes rumbos.—Por León, San Miguel y el Rincón de Ortega

Doblado, por León, Alvarez por el Rincón dicho y Blanco por

Suu Miguel

Noviranna 1%—En San Luis. — Día de Todos Santos.—

La plaza esta noche parece na feria.—La oeupación de Gua-

dalajara por Ogazón salió falsa—Nada de muevo.

O Biblioteca Nacional de España

192 DIAIO DEL COMONEL, VALDES

Dis 2—En San Luix.—Se osegura que el enemigo evacuó

la plaza de Guanajuato y que Vélez está en San Mignel.—

Se dice que los nuestros entraron hoy a Guanajuato por la

Luz y el camino de Silao.

Dis 3—En San Luis—El primero del corriente los la-

mados Generales Pacheco, Alfaro y Arteaga Manuel, fueron

derrotados entre Silao y Teón.—Toma de las Animas por

las fuerzas de Doblado. Tes quitaron las 4 piezas, mmehas

municiones de guerra, y entre los prisioneros se encuentra

Arteaga —Se celebró aquí la noticia con músicas, ete, ete,

Dia 4—En San Luis—Se confirmó la derrota eompleta

del enemigo en la Loma de las Animas, y la incorporación

de las fuerzas de Blanco con Arteaga—Estos últimos han

echado en corrida a Vélez, quitándole armamento, parque,

equipajes, ete—Los acontecimientos del día primero a la fe-

cha inelnan la balanza en muestro favor—Los triunfos del

pueblo son para la himanidad sonrisas para los Ángeles —

Tl asesino Márquez se cogió $600,000 del dinero que perte

necía a la conducta que de México enviaron a Guadalajara

Dis 5.—Fa San Tuis.—Planev no se ha reunido con Ar

teaga y no xabemos a punto Ajo qué se ha hecho Vélez.

Dis 6.—En San Luis —Ta Barra con 300 de los de Mon

clova, derrotó al enemigo que en número de 600 encontró en

Cieneguita, dos millas de San Miguel. — Blaneo de nuevo

había ocupado a San Mignel —Salió Degollado con su ralea

para Guanajuato—Escribí con D. Martín Rul al Goberna

dor Berduzco.—Salió Traconis y otros jefes y oficiales para

Tampico.

Día 7.—En San Luis.— Nuestras fuerzas todas se han

concentrado a Ciuanajuato.—Vélez y Paeheco entregaron la

Mmerza que les había quedado al indio Mejía que está en Que

rétaro, marchando ellos a México, presos por orden superior

O Biblioteca Nacional de España

MENORIAS DE LA GUERRA DR REFORMA 19

Woll, se asegura que evacvó la plaza de Zacatecas y está en

Agnascalientes.—Para hacerse de recursos cometió mil tro-

pelías en Zacatecas y Aguascalientes.

Dra 8—En San Luis —Llegó extraordinario de Degolla-

do, y dice que cl peladito Miramón llegó a Querétaro.—La

derrota de sus secuaces en el Bajío lo ha alarmado—De

gollado dice que lo irá a encontrar. Prieto aquí representa

al Gobierno general.—¡Cuántos cou amplísimas facultades

tenemos!

Día 9.—Fn San Tuis—Desde el 5 la División del Norte

está en San Miguel, y la del Centro en Silno.—Arteaga en

tre Arroyozarco y Querétaro, mientras que el aventurero

Woll contimaba en Zacatecas, segin últimos avisos—Es

prohiahle que las fuerzas se concentren para salirle al en-

cuentro al peladito Miramón.—Se asegura que Guadalajara

está sitiada.

Día 10.—En San Luis. —El aventurero Woll salió ayer de

Zueatecas, y se cree que va para el Bajío.-—Mañana o pasado

se anticipa un encuentro de armas entre nuestras fuerzas y

las del enemigo en Querétaro,

Día 11.—En San Luis —Hoy entran nuestras fuerzas en

Querétaro, o sus inmediaciones.—Se recibió orden de Dego-

lindo para que los fuerzas de Tamaulipas, que están para

Negar, y las de aquí, formen la brigada de reserva bajo las

órdenes de Garza Juan José, y que se eltúen en el Jaral.—

Guadalupe García Negó hoy, y vino orden general para que

marche a recibirse de su brigada que, bajo las órdenes de G6-

mez Farías, acompaña a Degollado,

Du 12—En San Luis—Se afirma que Degollado trata

de tener una entrevista con Miramón, y aun se asegura que

ha habido una suspensión de armas.—Sean cuales fueren las

transacciones que se celebren, si se efectúan, ningún bien po-

E

O Biblioteca Nacional de España

"e DIARIO DEL CONONAL VALDES OO

sitivo nox resultará en favor del pueblo, y en cualquier des-

cuido Degollado y xu camarilla nos falsean la revolución—

Degollado ya Imbiera celebrado ronrenios con el enemigo,

si uo viera que está muy xeguro de que los más de los jefes

de mestras fuerzas se opondrían a semejantes arreglos—

Entre Degollado, el eríminal de Doblado y otros pícaros, to-

davía le darán al infeliz pueblo nuchos dolores de cabeza.—

Salió Guadalupe García a tomar el mando de los de Tamau-

lipas que andan con Justito Alrare=—Alerta, pueblo, y ha-

¿eumos por que «? Meven a efecto las promesas que se te han

Techo.

Dia 13—En San Luis —Aguasentientes de nuevo ha sido

abandonado por los Constitucionalistas, y los handidos

Máximo González, Juan Chávez y cofrades son las inicas

antoridades de aquella desgraciada población —El aventu-

vero Woll continía en Zacatecns.—Se corre el borreyo de

que Degollado y el peladito Mivamón entran en convenios.

¿Dios nóx líbre! Dicen que ya viene Uruga, quien ha desen

barcado en Tampico—Acuérdense de Arroyozarco,

Día 14.—En San Luis —Nada de unevo, y continúa el bo-

rrego que quizá se celebren tratadas con los traidores de Ta-

enbaya.

Dia 15—En San Luis.—Anoche como a las 6, entraron

las fuerzas de Tamaulipas con una artillería (sic), parque,

vestuarios, ete—El silencio por el rumbo de Querétaro eau-

sa sn temores por lo que pueda estar sucediendo por aque-

Tos rambos.

Dia 16.—En San Luis. —El encuentro con el enemigo cer-

ca de Querétaro el 13 del corriente, fué adverso a las fuerzas

nuestras bajo las órdenes de D. Santos Degollado—Está

decretado que siempre perdamos cuando este hombre manda

en persona una acción.—Escribe de San Juan de Llano, que

O Biblioteca Nacional de España

MEMORIAS DE LA GUERRA DE REFORMA 18

nadie se mueva, y que aún nos queda fuerza y potencia.—

Fan Hegado ya muehos dispersos que cuentan de diversos

modos lo que sucelió.—Se asegura que Blanco cayó pristo-

mero, que Tapia murió y que después de todo la pérdida no

es tan considerable como muchos la «nponen.—Lo seguro es,

que mientras D. Santos Degollado continúe de General eu

Mefe, y que con este carácter se presente al frente de nues-

tras fuerzas, no hemos de ganar. Tos preciso convencernos

que el hombre no sirve para nada de esto, y mucho menos

sirve sn chmsma que lo rodea.—Son las 11 de la noche y na-

an de positivo sabemos en cuanto a la magnitud de la pér-
[truncated: 47,973 more chars]
