# Supplementary material for: A Methodological Framework for the Use of AI Tools in Automated Workflows for Generating Validated and Structured Historical Datasets
Source: Research Square preprint supplement (doi:10.21203/rs.3.rs-7943432/v1), 2025-11-17
Supplement: Supplementary file 37 [file SOBERON_GT.docx]

%p42-Soberon-2025-10-15%

1858

Enero

Domingo 3

Comienzan los toros.

Lunes 4

Toros.

Martes 5

Toros.

Miércoles 6

Reconoce el Ayuntamiento al coronel D. Martín Zayas como comandante militar del partido de Catorce nombrado por el gobernador D. Eulalio Degollado.

Lunes 11

Llegó el prefecto del distrito de El Venado, D. Anacleto de la Rosa a las siete de la noche, de Leoncito. Baile a suscripción en casa de Rafael Barrenechea.

Ayer se secó el Estanque Nuevo.

Martes 12

Sale de ésta el coronel Zayas con el prefecto De la Rosa a las cinco de la mañana con la fuerza que tenía a sus órdenes para El Canelo y Vacas.

%p43-Soberon-2025-10-15%

Llega el teniente coronel O’Horán a las nueve de la mañana a ocupar esta plaza con 46 hombres del 3o de caballería, y protege a la familia y casa del Señor Zayas.

Miércoles 13

Llega D. Teodoro Muro con 35 hombres de la Guardia Nacional de Catorce por orden de O’Horán.

Viernes 15

Llega el general D. Valentín Cruz del rumbo de Rioverde con 60 hombres del 3o de caballería y cien y pico de nacionales.

Miercoles 20

Pronúnciase el general Alfaro en San Luis por Bases Orgánicas y Santa Anna.

Estando en los toros, llega a ésta D. Francisco Alemán a hacer que secunden en ésta el pronunciamiento de Alfaro.

Por la noche hay junta de jefes y oficiales, y todos excepto el capitán D. Teodoro Muro se adhieren al plan.

Jueves 21

A las ocho de la mañana se subleva el 3o de caballería y consigue marcharse a San Luis con el general Cruz, O’Horán y los nacionales, excepto Muro, con los 30 hombres de Catorce que por mi empeño quedan en ésta cuidando el orden.

Domingo 24

A las nueve de la noche llega un oficial de parte del comandante D. Matilde Lucio, jefe de una partida mandada de Vacas por el coronel Zayas a intimar la desocupación de la plaza a toda fuerza pronunciada, y le contesta de oficio el presidente D. Juan Hernández que no hay pronunciados, y que puede ocupar la plaza a la hora que guste mañana.

A las cinco y media de la mañana se presenta en ésta el comandante Lucio con 50 hombres empeñado en desarmarla fuerza de Catorce, a lo que nos oponemos el presidente, el capitán Muro y yo por no deberse considerar como enemigos. En fin accede Muro a nuestras suplicas y entrega las armas respondiendo yo de su valor en caso de que el coronel Zayas no las devuelva.

%p44-Soberon-2025-10-15%

Martes 26

Llega el coronel Zayas de El Canelo y no quiso devolver las armas a Muro, por lo que yo las pagué dando una libranza de $500 que Muro me cobró en carta de hoy.

Llegaron también el prefecto De la Rosa y el licenciado D. Domingo Dena.

Domingo 31

Estando situados los coroneles Zayas y Aramberri en El Potrero con 150 hombres, reconocen al prefecto De la Rosa los pronunciados de Catorce.

Febrero

Lunes 1o

Llegan a ésta los señores Zayas y Aramberri con la fuerza que fue a El Potrero.

Martes 2

Salen con la misma fuerza los dichos señores para Represadero, igualmente que el prefecto y el licenciado Dena.

Martes 16

Vuelve la fuerza de Represadero a ésta con el señor Zayas y Aramberri.

Miércoles 17 (Ceniza)

A las ocho de la mañana ataca el general Cruz con 300 hombres y dos piezas de montaña en Solís al teniente coronel D. Mariano Escobedo, que tenía 200 hombres quienes se sostuvieron tres horas, y habiendo tocado parlamento el general Cruz, fue este señor a conferenciar a la casa con Escobedo. Entretanto se desbandó la infantería de San Luis, muerto su jefe el teniente coronel D. Atanasio Portillo, por lo que el

%p45-Soberon-2025-10-15%

general Cruz con el teniente coronel D. Francisco Alemán quedó como prisionero de las fuerzas de Nuevo León, y se retiraron 70 hombres del 3o de caballería con alguna infantería y un pedrero, habiendo quedado presos 32 soldados y el otro cañoncito y herido de un muslo D. Francisco Alemán.

En ésta recibió la noticia el coronel Zayas a las once y media de la mañana, y emprendió la marcha con 150 hombres de infantería a la una de la tarde para auxiliar a Escobedo, saliendo también el señor Aramberri.

Viernes 19

Vuelve a ésta con una escolta el coronel Zayas, trayendo al general Cruz prisionero.

Sábado 20

Hoy a las once de la mañana manda el coronel Zayas, previa sentencia de un consejo de guerra, fusilar al ladrón Basilio Sánchez. Sale después para Catorce con el prefecto De la Rosa, habiendo mandado 125 hombres de Nuevo León con anticipación por el Rincón de la Virgen, todo a consecuencia de haber aquella ciudad desconocido al prefecto [De la] Rosa y haber aprehendido al sub prefecto Gramón por orden del prefecto D. Juan Ramos y D. Crescencio Jaso.

Hoy llega D. Joaquín Hernández Soto de Solís, y dice que en aquella hacienda se han sublevado los 150 hombres de infantería de ésta y El Cedral, queriendo asesinar al prisionero Alemán, a lo que se oponen por la mañana y tarde los señores Aramberri y Escobedo, y con riesgo de sus vidas lo salvaron remitiéndolo para esta villa con D. Francisco Ceballos.

Martes 23

A consecuencia de un recado que me mandó el General Cruz, se vino por la noche con D. Francisco Alemán a mi casa a alojarse.

Miércoles 24

Llegan cinco ladrones de los principales que robaron a D. Felipe Medellín, habiendo sido aprehendidos en Medina.

%p46-Soberon-2025-10-15%

Viernes 26

Llega el teniente coronel Escobedo y D. Francisco Ceballos de Catorce, en donde dejaron al coronel Zayas.

Habiendo observado yo que el general Cruz y Alemán estaban alarmados en la tarde porque D. Francisco Ceballos les contó que el general Vidaurri da orden al señor Zayas que los mande a Monterrey amarrados y que el señor Degollado, gobernador de este estado, está en Solís desde ayer con 800 hombres y que podían emprender fuga de mi casa comprometiéndome a mí y a mi familia, dije al señor Escobedo delante del capitán D. Fernando Cordero que le daba parte de mis sospechas (a las siete de la noche de hoy) para evitar toda responsabilidad, que según el general Cruz no le había exigido el señor Zayas palabra de honor, y en fin, que el (señor Escobedo) se las exigiera y que pusiera de vigilancia dos o tres soldados suyos de confianza. Convino el señor Escobedo a lo que le insinué, pero no volvió en toda la noche ni puso los soldados en casa.

Una de mis observaciones fue de que el asistente de Alemán y el de Cruz se rasuraron el bigote hace dos días, y el asistente del primero desapareció de casa desde el oscurecer de hoy.

sábado 27

A las seis de la mañana me despertó el mozo Mónico Flores diciéndome que ya se habían fugado el general Cruz, D. Francisco Alemán y sus dos asistentes a medianoche. En el acto, Ínterin me levantaba, le mandé lo participara al señor Escobedo para que tomara providencias. Me levanté y fui yo a verlo, de lo que resultó que mandará aprehender a los mozos veladores Juan Reyes y Mónico Flores, habiéndole yo recordado que desde anoche le avisé que me sospechaba que se iban a fugar, para salvar mi responsabilidad. Vino a casa conmigo el señor comandante D. Juan Bautista Vega, y habiendo registrado la pieza en que los fugados estaban, se encontró porción de papeles rotos de los que formó boletas de letra de Alemán en que le decía al general Cruz que estaba de acuerdo el dependiente alto y que se irían a medianoche, con otras aclaraciones más. El señor Vega, por orden del señor Escobedo, se llevó a D. Luis Cázares, dependiente de esta negociación, para tomarle declaración y quedó arrestado con los mozos en el Mesón de San Carlos.

%p47-Soberon-2025-10-15%

Lunes 8

Se salió el dependiente D. Luis Cázares y se fue para San Luis.

Miércoles 10

Llegó el coronel de D. Juan Zuazua de El Cedral con 300 hombres de caballería.

Jueves 11

Llegó el asistente del coronel Zayas, Quiroga, de El Venado, y dan noticias del señor Zayas que permanece en aquella ciudad sin novedad. Que está en ella el gobernador Degollado, Aramberri, y el prefecto De La Rosa.

Viernes 12

A las diez de la mañana, salió de esta con rumbo a Represadero el Coronel Zuazua y la fuerza que trajo.

Sábado 13

Recibí carta fecha ayer del Coronel Zayas en El Venado, en que dice que sale ese mismo día para Bocas.

Miércoles 17

Fue enterrado a las cuatro de la mañana el cadáver de Máximo García, fusilado por ladrón el 1o de éste, y colgado hasta hoy al fin de la Calle Nueva. Concedió el permiso el coronel Zuazua el 11 de éste.

Jueves 18

Se supo en ésta que fue derrotado el general Parodi cerca de Celaya por el general Osollo, después de batirse el 9 y 10 de éste (batalla de Salamanca).

%p48-Soberon-2025-10-15%

Jueves 25

El teniente coronel Escobedo llega de Galeana con 400 hombres de infantería y caballería.

Sábado 27

A las diez de la mañana salió Escobedo con su fuerza rumbo a Bocas.

Abril

Domingo 4

Llegó de Monterrey el coronel licenciado D. Miguel Blanco con 200 hombres de caballería. El lunes 29 descolgaron y enterraron por cuenta de la hacienda de Carbonera el cadáver de “El Chueco”, José María González.

Lunes 5

Sale para Bocas la fuerza del señor Blanco, y llegará a ésta el señor prefecto De la Rosa con el licenciado Dena.

Martes 6

Nos aplica el prefecto $100 de préstamo a pagar de los derechos de la Aduana, según el recibo con fecha [de] hoy.

Miércoles 7

Llegan 800 hombres de infantería de Monterrey y seis cañones y 46 carros al mando del coronel D. Ignacio Zaragoza, que trae de secretario al teniente coronel del ejército D. José María García Brito. Me obligó Zaragoza a entregarle $330 de efectos que me paga con libranza contra el prefecto De la Rosa.

%p49-Soberon-2025-10-15%

Jueves 8

Sale Zaragoza con su sección para Represadero, y recibe en ésta los efectos el teniente Molina.

Sábado 10

Hoy a las cinco de la mañana bajaron y sepultaron el cadáver del bandido Rafael Morales (a) “El Águila”, habiendo permanecido expuesto cerca de La Conejera un mes [y] nueve días.

Domingo 11

Ayer pagó el señor prefecto De la Rosa la libranza del señor Zaragoza en Catorce a los señores Arguinzóniz y Echevarría.

Martes 13

A medianoche pasa por ésta el señor prefecto De la Rosa, de Catorce para Represadero.

Sábado 17

Al tiempo de pasar por el Puerto de Carretas, cerca de La Parada, el general D. Miguel Miramón, con 3 mil hombres y 12 piezas de artillería con que venía de Zacatecas para San Luis Potosí, lo atacan desde dos cerros en que estaban emboscados 2 mil hombres de Nuevo León al mando del coronel Zuazua, Zayas y Aramberri. Se baten cuerpo a cuerpo contra el 1er Batallón de línea de 300 hombres y con el de carabineros de 800 hombres mandados por el coronel D. Eligió Ruelas, quien con la bandera en la mano al frente de su batallón toma las posiciones de los de Nuevo León. Después de una lucha encarnizada, queda el campo lleno de muertos de ambas partes, y sigue sin novedad el general Miramón con su brigada que entró a San Luis a las siete de la noche con su artillería, carros, etc. Y los jefes de Nuevo León vuelven a Bocas y El Venado con sus tropas.

%p50-Soberon-2025-10-15%

Domingo 18

Pasa por ésta un extraordinario de Zuazua diciendo que lleva la noticia de la completa derrota de Miramón, y conduce una banderola de caballería con dos G.G. y otra de infantería con “3o Lo”. La primera de paño encarnado y la segunda de lienzo blanco.

Lunes 19

Hoy mismo se sabe que por Santa Cruz, Pastoriza, La Encarnación, La Presa y alrededores de ésta, están pasando muchos dispersos a pie y a caballo con armas los más, y entre ellos el coronel Ayarzagoitia.

Martes 27

A las doce de la mañana llegaron a esta villa con dirección a Nuevo León la familia del gobernador Degollado, la del licenciado Dena, la de D. Matilde Lucio y la de D. José de la Luz de la Rosa. Vienen escoltándolas los dos señores Lucio y De la Rosa con diez o quince hombres.

Hoy mismo se sabe que las fuerzas de Nuevo León al mando del coronel Zuazua han marchado para Guanamé con rumbo a Zacatecas, y los acompañan el señor Degollado, el prefecto De la Rosa y las fuerzas de este estado.

Miércoles 28

A la madrugada marcharon para El Canelo las familias que llegaron ayer.

Jueves 29

A las ocho de la noche pasó un extraordinario para Monterrey, y dijo de palabra que el 27 había tomado el coronel Zuazua a Zacatecas por asalto. Que cogió prisionero al general Mañero, a dos coroneles y a 70 oficiales. Que murieron muchos de los reaccionarios y cosa de diez hombres de los de Nuevo León, San Luis y Zacatecas.

%p51-Soberon-2025-10-15%

Mayo

Domingo 2

Por el Periódico Oficial de Zacatecas se supo que fueron fusilados Manero, Diezache y tres jefes más: Aduna, Landa y Gallardo, que cayeron prisioneros.

Viernes 7

Se comenzó a llenar el Estanque Nuevo por haber llovido en La Boca desde la una y media de la tarde y sin llover en ésta, habiendo durado la seca desde el 1o de enero de este año que se secó el Estanque.

Sábado 8

A las dos de la mañana de hoy cayó un aguacero fuerte que llenó el Estanque Nuevo, y El Colorado y el aljibe mío tomó agua.

Domingo 16

A las ocho y cuarto de la mañana falleció mi sobrina política y comadre Rosa Martín de Barrenechea, y Rafael Barrenechea con sus dos niñas salió para La Presa a las tres de la tarde.

Se casó Juan Delgado con Francisca Morales.

Lunes 17

A las once de. la mañana volvimos del entierro de Rosa.

Miércoles 19

Hoy se abrió la tienda, que estuvo cerrada tres días por la muerte de Rosa.

Lunes 24

Fuimos comisionados por el Ayuntamiento el regidor 1o D. Casiano Carmona, regidor 4o yo y D. Miguel Quijano, particular a reconocer

%p52-Soberon-2025-10-15%

las tomas de agua hasta Caleros a consecuencia de un escrito presentado por D. Pedro Medellín y Ruelas, que se queja de despojo por el Ayuntamiento, cuando éste sólo ha procurado evitar que se surta de agua el Estanque Nuevo sin atacar ninguna propiedad.

Viernes 28

Hoy se supo de cierto que el 15 de éste fue completamente derrotado cerca de Tampico D. Juan José de la Garza por el general D. Tomás Mejía, que llevaba 1 500 hombres. Le quitó 12 cañones y 16 carros de parque con parque; muchos prisioneros, entre ellos el manco Areguyín. Murieron el coronel D. Rafael Quintero y el coronel Marroquín. De la Garza huyó y llegó a Victoria el viernes 21 de éste con 30 hombres y una pieza de a cuatro. Mejía lo ha perseguido y no se sabe hasta hoy el resultado.

Sábado 29

Llegó del rumbo de Salinas el coronel Zayas a las nueve de la mañana con su Estado Mayor compuesto por 20 oficiales poco más o menos y tres piezas de montaña en muías.

Viene D. Lorenzo Vega, D. Francisco Sustaita, D. N. Otero (capitán del 3o de caballería) los dos hermanos Vargas de San Luis Potosí Vicente Hernández, Don José Mora de Zacatecas, el prisionero de Carretas, joven hijo del coronel Junquito y otros subalternos.

Domingo 30

A las nueve de la mañana salió Zayas con el licenciado D. Carlos Escobar y toda su comitiva para el rumbo de Boquillas, según dijo.

A las once del día llegó Manuel Torres, mozo de Represadero a quien envió anteayer el coronel Zayas con una comunicación para D. José María Barragán, prefecto del Valle del Maíz. Llegó Torres a las Norias del Conde, y lo hizo retroceder D. Agustín Castillo porque iba a llegar a su hacienda ayer mismo una partida del ejército. Torres no encontró aquí a Zayas, y fue a alcanzarle.

Hoy se enterró en esta villa el tesoro de la Capilla del Santo Niño por el cura Cervantes y D. Juan González Lavín.

%p53-Soberon-2025-10-15%

Junio

Martes 3

A las cinco de la mañana supe que a las nueve de anoche fue herido mortalmente cerca del corazón en El Cedral D. Felipe Lara y llevaron de ésta al médico D. Eduardo Calvillo a las doce de la noche. No se sabe aún quién lo hirió.

Jueves 5

Llegaron los Barrenechea de El Cedral de visitar a D. Felipe Lara, y dicen que aunque la herida es grave, hay esperanzas de que se salve. Que lo hirió un soldado de los de Nuevo León, de la compañía de un capitán Lozano, y que está libre el asesino, habiendo sido una traición estando Lara hablando con un sargento de ellos.

Por un sobrino de Escajadillo que llegó anoche de Tampico se sabe que Zayas está en Tula.

Domingo 7

A las nueve y media de la noche se casó Agustín Barrenechea con Concepción López, hija de Nazario López.

Domingo 20

El martes 15 de éste atacaron el coronel D. Felipe N. Chacón y el coronel Barrera con 400 hombres en el Valle del Maíz al coronel Barragán, quien estaba allí con 300 hombres. Lo derrotó y le quitó dos piezas de artillería, 90 rifles, parque etc. Le mató 30 hombres y cogió 40 prisioneros, entre ellos un oficial y tres irlandeses. Dice el parte que Zayas escapó a caballo con rumbo a Tula, de donde pasó huyendo por Palmillas con algunos oficiales y 15 hombres.

Jueves 24

Se sabe en ésta que en San Luis Potosí murió de fiebre cerebral el general D. Luis Gonzaga Osollo el 21, y que el general D. Miguel Miramón

%p54-Soberon-2025-10-15%

había salido con rumbo a Guadalajara con 4 mil hombres y 13 cañones a los dos días de estar enfermo el señor Osollo.

Viernes 25

Ayer 24 sorprendió en Charcas una partida de 200 hombres de caballería al mando del coronel D. Felipe Chacón a las cuatro de la tarde al prefecto D. Anacleto de la Rosa y a D. Matilde Lucio, que tenían 200 hombres sobre las armas. Éstos se desbandaron y los primeros huyeron por Charcas Viejas.

Domingo 27

Entra en Catorce D. Crescencio Jaso con nombramiento de prefecto por el gobernador Ochoa, y con él el coronel D. Felipe N. Chacón con 200 hombres de caballería. Antes de su entrada, huyen de Catorce las autoridades y empleados.

Martes 29

A la madrugada salen Jaso y Chacón con la tropa por los Catorce sin saberse hoy el rumbo que toman.

Miércoles 30

Anoche a las nueve de ella llegaron a El Pantanito Chacón, Jaso y Muro con 25 dragones, y vienen a casa de D. Zeferino Flores, con quien están hora y media, y después vuelven a irse con rumbo a El Cedral sin que hasta hoy se haya sabido el objeto de su venida.

Se sabe que el prefecto D. Anacleto de la Rosa escribió desde La Blanca a su familia que está en ésta.

Julio

Viernes 2

Recibe el alcalde 1o D. Juan Hernández un exhorto del juez de Monterrey para que tome declaración a D. Jesús Reyes y a Agustín Barrenechea

%p55-Soberon-2025-10-15%

sobre la muerte violenta del dentista J. A. Butterfield, ocurrida el 1o de junio próximo pasado en El Cedral, habiéndolo medicinado el médico D. José María Baber, a quien acusan de envenenamiento y robo, y le están formando causa en Monterrey, en donde está preso.

Hoy se supo que el general Osollo está enterrado en la bóveda principal de San Francisco en San Luis desde el 21 del próximo pasado.

Sábado 3

Hoy llegó de San Luis Francisco Castro con cartas de D. Juan González Lavín e Hilarión Gaitán, en que participan que el miércoles 30 de junio a las cuatro de la tarde tomaron a viva fuerza aquella plaza los coroneles Zuazua, Aramberri y Zaragoza con tres a 4 mil hombres y 20 piezas, habiéndose defendido los reaccionarios dos días con mil y pico [de hombres] y 20 piezas. El gobernador D. Juan Othón, prefecto D. Nicanor Lobo, los jefes militares general Sánchez, general Calvo, O’Horán y otros con la caballería, 300 hombres al mando de O’Horán se salieron el mismo día 30 por el camino de México y fueron hasta Guanajuato.

Saquearon en San Luis el 30 en la tarde cerca de 400 casas.

Se supo también que al momento que tomaron a San Luis salieron 500 hombres con rumbo a estos puntos a perseguir al coronel Chacón, que con 180 hombres había salido el 29 de Catorce para el rumbo de Coronado con Jaso y Muro.

Que a D. José Alcocer le dieron un pistoletazo en un brazo el miércoles 30, de lo que resultó que se lo amputaron.

Miércoles 7

Se sabe que no es cierto haya salido Aramberri a perseguir a Chacón, y sí que éste se ha ido por la sierra a Querétaro.

Jueves 5 (no concuerdan las fechas)

Llega a las dos de la tarde a Vanegas de Monterrey el E.S. general Vidaurri con su secretario, el licenciado García Rejón, y su Estado Mayor con cien y pico de hombres de escolta.

%p56-Soberon-2025-10-15%

Viernes 6

Salimos en comisión a Vanegas a felicitar a nombre del Ayuntamiento y vecindario al señor Vidaurri, D. Trinidad Gaitán, D. Miguel Quijano y yo. También fuimos encargados de suplicarle a su Exelencia contenga las demasías del oficial D. Guadalupe Morales, que vino comisionado desde el día 4 para formar una compañía de 80 hombres y encerró las rondas en la cárcel la noche del 5, chocando con el presidente D. Juan Hernández y listando hasta los viejos contra el tenor expreso de la comunicación del señor Vidaurri fechada el 1o en El Saltillo.

Sábado 7

A las cuatro de la tarde volvimos de Vanegas, en donde fuimos oídos y atendidos por el señor general Vidaurri, quien nombró en lugar de Morales al oficial D. Mateo Hinojosa, y al de igual clase D. Manuel Iglesias, los cuales llegaron a la oración de la noche.

Domingo 8

El señor Hinojosa destituye al señor Morales con arreglo a la orden del señor general, y Morales con otros tres oficiales sale para El Cedral conforme a la orden superior.

(El señor general Vidaurri dijo a la comisión el sábado 7 a las ocho y media de la mañana que su opinión respecto del finado general D. Luis Gonzaga Osollo es que era digno de mandar un verdadero ejército y no el que mandaba. Que era valiente, honrado, instruido; en fin, capaz para todo por sus excelentes cualidades, pero que su opinión conservadora lo perdió porque no tenía quién lo ayudara, y que él, (Vidaurri), no tenía ningún temor de combatir con Osollo porque no había gente en el ejército capaz de comprenderlo ni de cumplir sus órdenes).

Martes 10

(Honras de la finada Dña. Josefa Castillo de Soberón, de cuenta de D. Francisco Soberón).

A las nueve de la mañana sale a San Luis D. Juan H. Bahnsen en quitrín, y con él se va D. Antonio Soberón conforme a la orden que el

%p57-Soberon-2025-10-15%

8 de éste recibió en Vanegas del señor Vidaurri, quien le dijo que en aquella ciudad lo quería emplear en el Ejército del Norte.

Hoy sale D. Anastasio Alcocer con su esposa e hijos y D. Mariano Alcocer para Soledad, habiendo llegado anoche de San Luis, en quedó el resto de la familia.

Se sabe que el señor Vidaurri salió de Vanegas el domingo 8 para San Luis Potosí por Guadalupe del Carnicero.

Viernes 13

Llega el teniente coronel D. Gabino San Miguel de Monterrey con 500 hombres de infantería.

Domingo 15

A nombre del señor D. Gabino San Miguel fui convidado por D. Fausto Herrero para apadrinar la bendición de la bandera del Batallón 2o de infantería que manda el primero. Accedí por amistad, y se efectuó el acto por el señor cura interino D. Julio Díaz en la iglesia parroquial a las seis y media de la tarde, teniendo el batallón 600 plazas, la mayor parte reclutas del Valle, El Cedral, Saltillo y esta villa. Por la noche vino a casa el señor San Miguel con el comandante D. Francisco Aguirre y todos los oficiales a darme las gracias, y estuvieron hasta las nueve y media, de ella habiendo tocado la música de esta villa, la que han obligado a marchar con ellos.

Lunes 16

A las ocho y media de la mañana sale el teniente coronel San Miguel con su batallón para San Luis Potosí. Se lleva la música de esta villa.

Recibí carta de mi sobrino Juan Gutiérrez, fechada en San Luis el 14 de éste, en la que me participa que el 13 del mismo entró en aquella ciudad a las once y media de la mañana el señor Vidaurri.

Dejó D. Gabino San Miguel 40 fusiles de fulminante con bayonetas para la compañía de seguridad pública de esta villa por orden del señor Vidaurri, quien la mandó formar desde Vanegas y fueron electos, por 92 hombres del vecindario [los siguientes]:

%p58-Soberon-2025-10-15%

Capitán Pompa, primer teniente Agustín Barrenechea, segundo teniente D. Zeferino Flores, primer subteniente Quijano y segundo subteniente D. Juan Delgado.

Martes 17

El alcalde 1o D. Juan Hernández recibió del teniente coronel San Miguel 40 fusiles con bayoneta para la compañía de seguridad pública, y los puso en esta casa depositados. Hoy se repartieron por orden del capitán D. José María Pompa como sigue:

A D. Jesús Soriano ocho fusiles con bayoneta

A D. Zeferino Flores ocho fusiles con bayoneta

A esta casa cuatro fusiles con bayoneta quebrados.

A D. Juan González seis fusiles con bayoneta

A D. Trinidad Gaitán ocho fusiles con bayoneta

Al Arco Iris cuatro fusiles con bayoneta

A D. Agustín Barrenechea dos fusiles con bayoneta

[Total] 40.

De los cuatro de esta casa presté uno a Báez y uno a Margarita Mendoza.

Lunes 23

A las nueve de la mañana sale D. Francisco Ceballos con su esposa y familia para Catorce a radicarse en aquella ciudad.

Viernes 27

El presidente en turno (sin consulta del Ayuntamiento) entrega 20 fusiles de los que dejó D. Gabino San Miguel al comandante D. Marcos Rodríguez, que pasó para San Luis con reclutas del Valle.

Domingo 29

Recibe D. Juan Hernández una comunicación del licenciado D. Manuel García Rejón con el brevete de Ejército del Norte fechada el 26 en San Luis, en la que le dice que de la averiguación practicada en El Cedral por el capitán Zepeda resulta que es protector de la reacción, y que ha procurado

%p59-Soberon-2025-10-15%

no cumplir las órdenes que ha recibido para proteger al ejército, y que el señor Vidaurri le ordena que reúna el vecindario para que nombre otro alcalde 1o en su lugar, quedando destituido porque no merece su confianza, etc.

Lunes 30

Se reúne el vecindario y nombra a D. Teodoro Castillo de presidente y alcalde 1o, de cuyo empleo toma posesión por la tarde.

Se sabe de cierto que el señor Vidaurri ha hecho también las fortificaciones de San Luis Potosí, y que el coronel Zuazua salió de aquella capital para El Jaral a encontrar a Miramón, que se dirige por San Miguel y San Felipe contra San Luis.

Agosto

Jueves 2

A las diez de la mañana llega de San Luis a ésta el coronel D. José Silvestre Aramberri con dos ayudantes, y según dice viene con licencia para estar unos días con su familia en El Canelo, para donde sale a las dos de la tarde.

Llega a las cinco de la tarde D. José Alcocer con familia de Los Pozos.

Recibe noticia el presidente D. Teodoro Castillo que hace tres noches pasaron por las Norias del Valle 40 hombres con blusas, bien montados y armados, y se sospecha que son ladrones, por lo que se toman en ésta algunas providencias, entre ellas poner sobre las armas 20 hombres de seguridad pública.

Sábado 3 [sic] 4

Se va para Soledad D. José Alcocer y la familia.

Recibe orden de Vidaurri el presidente Castillo para remitir a Catorce diez fusiles, lo cual ejecutó a las dos de la tarde con cuatro mozos armados, quedando en ésta sólo diez fusiles de los 40 que habían quedado para defensa de esta población.

%p60-Soberon-2025-10-15%

Lunes 6

Reúne el presidente del Ayuntamiento Castillo a los vecinos para hacernos saber que no siendo útil la compañía de seguridad pública, y siguiendo las noticias de que una cuadrilla de ladrones quiere caer a esta población, se ve precisado a reasumir el mando y en lugar de la compañía señalar mozos a los vecinos todas las noches bajo una multa de $2 el que no obedezca. Así se acordó comenzando desde el martes 7.

Miércoles 8

Por el correo vino la noticia de que el señor Vidaurri dio orden con fecha 6 de éste para que todos los españoles salgan de San Luis Potosí con rumbo a Monterrey para las ocho de la mañana del 7, en la inteligencia de que los que estuvieran aún en adelante serán presos y conducidos a dicho punto.

Jueves 9

Con esta fecha escribe Aranda de San Luis que Miramón ha forzado el puerto de San Bartolo, y que ya está en el Valle de San Francisco y Zuazua en el Ojo del Gato; que Vidaurri salió el 6 con rumbo a Santa María del Río, y Villela por dónde vienen los cañones y trenes de Miramón.

Sábado 11

Sale el señor Vidaurri de San Luis con 3 mil hombres y treinta y tantos cañones, parque y carros para el rumbo de La Parada, Bocas y Ahualulco dejando sola la ciudad.

Domingo 12

Llega Vidaurri a La Parada, en donde toda establece su campo.

Entra Miramón a San Luis Potosí con su artillería etc. y de 4 mil a 5 mil hombres.

%p61-Soberon-2025-10-15%

Sábado 25

A las siete de la noche observamos un cometa sobre el Cerro del Fraile, al poniente de esta villa, con la cabellera al norte. Su tamaño es pequeño; se ha visto desde hace tres noches y desapareció hoy a las siete y media de la misma.

Hoy salió de San Luis Miramón con su tropa y artillería con dirección al Puerto de Carretas, Ahualulco y La Parada a atacar a Vidaurri, que en estos puntos está situado con su ejército.

Domingo 26

Comienzan hoy a batirse ambos ejércitos beligerantes, sin que se sepa aquí el resultado hasta hoy, sólo que sigue oyéndose el cañoneo hasta Laguna Seca.

Miércoles 29

En las cercanías de Ahualulco está hoy completamente derrotado por el general Miramón el ejército del general Vidaurri, quedando en poder del primero toda la artillería, 30 piezas, 132 carros de armas, parque, 800 caballos, efectos, y porción de prisioneros y muertos, sin que hasta hoy (octubre 6, miércoles) se sepa el detalle de la acción, sólo que Vidaurri se fue violentamente con porción de jefes y oficiales y poca tropa para Monterrey por el Mazapil, hasta donde lo acompañó el guarda de esta Aduana, Florentino Vega, como mozo de D. José María Aguirre y Gómez, que llegó ayer, 5 de éste.

Octubre

Jueves 7

El señor general Chacón y prefecto D. Crescencio Jaso entran mediodía a El Cedral sin novedad alguna.

Viernes 8

Sale el general Chacón para Vacas y El Canelo con 200 hombres, y se queda en El Cedral el señor prefecto con el resto de la fuerza.

%p62-Soberon-2025-10-15%

Sábado 9

Se presenta en esta villa D. Cleto Sánchez con despacho de administrador de la Aduana, y el actual D. Manuel Martínez consulta con el señor Jaso su entrega, a lo que contesta que no lo haga hasta que él venga a esta villa.

Martes 12

A la una de la tarde recibió el presidente D. Teodoro Castillo una comunicación fechada ayer en Catorce por el prefecto de dicho distrito, D. Crescencio Jaso, en la que le ordena reúna al vecindario para que libremente se adhieran al gobierno del departamento de San Luis, y no permanezcan sustraídos a su obediencia. A las cuatro de dicha tarde nos reunimos como 20 vecinos, y habiendo hecho la reflexión de que faltaba una mayoría, se suspendió el acto hasta mañana, con lo que se dio cuenta hoy mismo al señor Jaso.

Miércoles 13

A las cuatro de esta tarde nos reunimos 40 vecinos bajo la presidencia de D. Teodoro Castillo, y después de haberse leído la comunicación del señor prefecto Jaso, nos adherimos todos al gobierno del departamento, excepto D. José María Villanueva, que dijo era neutral. Se levantó un acta que se remitirá mañana a Catorce. Se supo de cierto que ayer entraron a Catorce 350 dragones al mando del general D. Felipe N. Chacón.

Domingo 17

A las siete de la noche llega de El Cedral el señor prefecto Jaso con D. Teodoro Muro y un mozo, sin escolta alguna.

Lunes 18

Hoy voy con Soriano, comisionados ambos por el Ayuntamiento, para felicitar al señor Jaso, y nos recibe muy bien, así como no admite la renuncia al presidente D. Teodoro Castillo.

Martes 19

A las nueve de la mañana llega de El Cedral el general Chacón con su sección de caballería de 300 hombres, y se aloja en la casa de D. Carlos Morales.

Se sabe hoy mismo que por Mingolé han aprehendido los rancheros al licenciado D. Domingo Dena hace tres o cuatro días, y lo han llevado a El Venado muy maltratado en unión de otros dos.

%p63-Soberon-2025-10-15%

D. Antonio Gaitán y yo fuimos a encontrar al general hasta el Ojo de Agua, como regidores nombrados en comisión por el presidente Castillo.

Miércoles 20

A las cuatro de la tarde se reunió el Ayuntamiento bajo la presidencia del prefecto Jaso, y después de darnos las gracias por haber mantenido la tranquilidad pública en las circunstancias actuales, nos disolvió quedando nombrados por dicho prefecto los siguientes:

D. Zeferino Flores, alcalde 1o

D. Agustín Barrenechea, suplente

D. Juan Hernández, alcalde 2o

D. Austacio Huerta, suplente

D. José María Abrego, síndico

Después nos citaron a D. José María Pompa, D. Trinidad Gaitán, D. Agustín Barrenechea, D. Austacio Huerta, D. Diego González, D. Francisco Soberón, D. Fausto Herrero y yo ante el general Chacón para notificarnos un préstamo de $8 000, tan mal repartido que a mí eran $2 000 y a los demás mucho menos, pero conseguimos del general que sólo adelantáramos $6 000 por esta noche, y que se hiciera una nueva asignación por una junta de vecinos en la que con equidad se repartirían los $8 000. Concluimos el negocio a las diez de la noche, dando Francisco Soberón y yo $1 000 de adelanto.

Se me ha asegurado que fué la cantidad excesiva a mí por la bendición de la bandera, etc., etc.

Jueves 21

Una partida de cien hombres que salió ayer a mediodía al mando del teniente coronel Arguelles, aprehendió anoche en Magdalena a Anacleto de la Rosa y a D. Matilde Lucio y otros, según aseguró hoy D. Florentino López, y que han fusilado en El Venado al licenciado D. Domingo Dena por orden del general Miramón.

A las nueve de la mañana de hoy salió con 200 hombres el general Chacón con rumbo a San Luis, no habiendo dejado fuerza ninguna en ésta.

Hoy entregó la Aduana D. Manuel Martínez a D. Cleto Sánchez, nombrado administrador por el general Miramón (falsa la aprehensión de De la Rosa y Lucio).

%p64-Soberon-2025-10-15%

Viernes 22

En la tarde volvió de Represadero D. Crescencio Jaso, dejando ya reglamentada la fracción, atendida la Villa de Guadalupe: juez D. Rafael Flores, y suplente D. Francisco Viera Coronado.

El juez de Solís se fugó ayer porque anteayer detuvo y sublevó la gente de la hacienda por dos extraordinarios que el general Miramón mandaba al general Chacón. D. Joaquín Hernández Soto pidió auxilio a la autoridad de Represadero, quien fue personalmente con gente y salvó los extraordinarios que Chacón mandó de aquí al teniente coronel Argüelles con un escuadrón.

Domingo 24

Haciendo una hermosa noche de luna, fue robada la casa de Dña. Josefa Contreras a las once y media de la noche por cuatro o seis ladrones rateros que se supone fueron introducidos por gente que sabe las costumbres de dicha casa. Rompieron una ventana interior, sorprendieron dormida a la señora Contreras, le pidieron las llaves, y robaron seis mil y pico de onzas de oro y como $5 000 en plata sellada de D. Fausto Herrero (ausente en Charcas), y de ella cuatro cintillos, dos toquillas de perlas y un rosario de oro, todo por valor de cerca de $20 000.

José María López y el dependiente D. Ramón Escajadillo, dormidos en la trastienda, no sintieron nada porque el dinero estaba en las piezas de las señoras.

Los ladrones salieron por el zaguán y entraron por la azotea, según todos los indicios. En la noche han sido aprehendidos los pecheros y otros sospechosos sin que hasta hoy, (lunes 25), se haya podido descubrir nada.

Lunes 25

Hoy se han cateado por D. Zeferino Flores varias casas sospechosas, y se aprehendieron los pecheros y otros varilleros desconocidos. D. Fausto Herrero llegó a las diez de la noche habiendo salido de Charcas a las doce de la tarde (no hay ni indicios de los ladrones).

%p65-Soberon-2025-10-15%

Miércoles 27

A las tres de la mañana de hoy se quemó la jabonería del Arco Iris, y sin más pérdida que los techos y puertas de dos piezas en que está, se apagó el fuego habiendo habido grande alarma en la población.

Se asegura que al pasar Chacón por El Venado mandó fusilar al licenciado D. Domingo Dena y al barbero D. José María Hernández.

Noviembre

Lunes 1o

A la medianoche en El Cedral se sublevaron los pelados acaudillados por Pablo Sánchez y Próspero Cárdenas, y en número como de cien a 200 hombres con 50 o 60 armas de fuego echan fuera los presos de la cárcel, saquean la casa de D. Félix Elorza hieren gravemente a Guadalupe Elorza, y después van a la plaza a saquear las tiendas de ropa; pero D. Patricio Lambarri, D. José Ruiz y otros les hacen fuego desde sus azoteas, y después de dos horas de tentativas para robar se dispersa la mayor parte, yéndose para El Canelo Pablo Sánchez con algunos de ellos en la madrugada del martes 2.

Martes 2

Desapareció el cometa que se comenzó a observar en ésta desde el 21 de octubre, y duró a la simple vista 42 noches, y nunca dejó de meterse antes de las ocho de la noche. Desapareció casi en el sur de esta villa, por el rumbo de La Maroma.

Domingo 7

Es derrotado en Cerritos el teniente coronel D. Francisco Alemán, que tenía 80 hombres por los rancheros y pelados, que en número [eran] más de 300. Saquean la tienda de D. Eduardo Menezo, a quien arrastran y dejan mal herido.

%p66-Soberon-2025-10-15%

Miércoles 17

Se sabe ya de cierto por los periódicos de México que el 27 del próximo pasado octubre tomaron Degollado y Coronado a Guadalajara. Asesinaron a Blancarte, Casanova, Piélago y Montoya, y saquearon la ciudad, etc., etc.

Hoy llega de Bayona la noticia de la muerte de mi cuñado D. Pedro Barrenechea el 26 de septiembre.

Sábado 27

A las diez de la mañana es herido el alcalde 2o, D. Juan Hernández, frente a su casa, alevosamente por el antiguo guarda Florentino Vega con un puñal que le corta de la frente al ojo izquierdo y el dedo chico de la mano izquierda, estando D. Juan sin armas. Se fuga el asesino tomando el camino de El Cedral, quedando el crimen impune.

A las once de la mañana uno de los pecheros roba una pieza de indianilla a D. Diego González, y éste lo apalea con la vara de medir hasta herirlo gravemente, y lo llevan a la cárcel.

Martes 30

José María González, yerno de Obispo Rangel, amenaza con una daga al alcalde 1o D. Zeferino Flores por la tarde, quien se la quita y lo manda a la cárcel.

Diciembre

Viernes 3

A las siete de la noche viene Antonio Orozco y dice que Zayas ha derrotado en Cerritos a la tropa de San Luis; tiene prisionero al coronel Inguanzo y ya va en marcha para atacar San Luis.

Que Degollado (D. Santos) ha derrotado en el puente de Jolotitlán al general Márquez completamente, perdiendo mucha gente el primero y toda la artillería y demás pertrechos el segundo.

%p67-Soberon-2025-10-15%

Sábado 4

A las once de la mañana llega de San Luis Potosí el licenciado D. José María Aguirre a reunirse con su familia en ésta.

A las siete de esta noche se pronuncia en El Cedral por la Constitución de 1857 D. Jerónimo Amaya con 15 hombres sin desorden ninguno.

Domingo 5

El mismo Amaya quita las autoridades que había puesto el prefecto Jaso en El Cedral, y pone de alcaldes a D. Inocencio Covarrubias y a D. Vicente Campos. Impone un préstamo de $4 000.

Al obscurecer se va para La Presa el administrador de esta Aduana, D. Cleto Sánchez.

Sábado 11

A las once de la mañana llega un extraordinario de El Cedral con una comunicación del señor Amaya en que ordena al alcalde 1o D. Zeferino Flores que reúna al vecindario violentamente y que digan las autoridades y vecinos si se deciden por la Constitución de 1857, y si para la una de la tarde no va la contestación, vendrá a atacar a fuego y sangre esta villa sin ser responsable de lo que ocurra. Nos reunimos en la casa de D. Zeferino, y por evitar las consecuencias, todos sin excepción nos adherimos a la Constitución, nombrándose en comisión para que fuera a El Cedral a suplicar al jefe y al subprefecto, D. Inocencio Covarrubias, que no vengan con su fuerza porque sería promover una sublevación. Sale la comisión compuesta por D. Teodoro Castillo, D. Trinidad Gaitán, D. Jesús Soriano y D. Manuel Martínez, que encuentran a las cuatro de la tarde al señor Amaya y [al] señor Covarrubias en La Cabra, y los convencen de tal manera que se vuelven a El Cedral prometiendo que vendrán mañana antes que amanezca para evitar un trastorno en la población. Sabiendo esto el alcalde 1o D. Zeferino Flores, nos comisiona para salir a la madrugada a recibirlos al alcalde 2o D. Austacio Huerta, a D. Felipe Hoyuela y a mí con el objeto de que no haya gritos sediciosos, etc.

%p68-Soberon-2025-10-15%

Domingo 12

Salimos a las cuatro y media de la mañana el alcalde 2o Huerta, Hoyuela y yo a caballo hasta cerca del Ojo de Agua, y encontramos un extraordinario de El Cedral que traía una comunicación del señor Amaya fechada a media noche, en la que dice que no viene con su fuerza porque desea evitar un movimiento nocivo a la población, pero que reúna violentamente el vecindario y se elijan un alcalde 1o y 2o, cuatro regidores y un síndico, y se forme un acta adhiriéndose a la Constitución, dándosele cuenta inmediatamente en la inteligencia de que, de no hacerlo así, vendrá mañana con su fuerza y no será responsable de las consecuencias.

A las once de la mañana nos reunimos 20 vecinos bajo la presidencia de D. Austacio Huerta, y quedó electo el siguiente Ayuntamiento:

Alcalde 1o D. Casiano Carmona

Alcalde 2o D. Miguel Quijano

Regidor 1o D. Antonio Gaitán

Regidor 2o D. Hilarión Gaitán

Regidor 3o D. Ambrosio Nieto

Regidor 4o D. José María Villanueva

Síndico D. Julio Armijo

Tomó posesión el señor Carmona, y bajo su presidencia se adhirieron a la Constitución.

Martes 14

A las siete de la noche entran en ésta doscientos y pico de hombres de infantería y caballería al mando del señor comandante de esta línea, nombrado por el gobernador del departamento D. Joaquín Errazú y García, habiendo hecho la jornada de Solís a esta villa. Con dicha fuerza llega el señor prefecto D. Crescencio Jaso.

A las ocho de la noche se sabe de cierto que han entrado a Catorce como 300 hombres al mando de D. Julián Quiroga y los de El Cedral.

%p69-Soberon-2025-10-15%

Miércoles 15

A las nueve de la mañana nos obliga D. Zeferino Flores, por una orden del señor Errazú, a que le entreguemos los rifles que tengamos los Barrenechea, D. Trinidad Gaitán, Arco Iris y nosotros.

Francisco y yo nos vemos con el señor Errazú y sólo entregamos dos fusiles de percusión, dos de chispa y un rifle reforzado viejo.

A las once nos cita D. Zeferino Flores para el juzgado, y el señor Jaso nos hace presente a todos los vecinos que debemos estar todos armados para rechazar a los de El Cedral bajo las órdenes de un comandante militar que dejará nombrado el señor Errazú, quien nos dijo que hoy mismo salía con toda la fuerza a batir a los de Catorce, pero que traía órdenes de fusilar a todo el que no se defendiera o lo traicionara ínterin esté fuera.

Por la noche se nos obliga por una circular a que pongamos inmediatamente a disposición del señor Errazú un mozo montado, y por nuestra parte va Doroteo Ramírez.

Jueves 16

A las cuatro o cinco de la mañana sale el comandante Errazú con toda su fuerza para El Cedral.

Entre Palmas y El Cedral es atacado Errazú por una emboscada de tropas de Nuevo León al mando del coronel Quiroga, y prontamente derrotada su fuerza a las nueve o diez de la mañana, quedando muertos como 18 y 70 u 80 prisioneros de la infantería de El Venado y Catorce. La guerrilla Miramón huyó sin combatir. El comandante D. Joaquín Errazú pasó por el poniente de esta villa con algunos de a caballo, y el prefecto Jaso pasó por ésta en donde estuvo un rato con D. Matías Aguirre.

La piececita de artillería se la llevó con rumbo de La Presa D. Carlos Francisco Morales con seis o siete dispersos.

Desde las diez de la mañana tenemos las tiendas cerradas y todos los vecinos en actitud de defensa por temor de que los dispersos unidos con algunos malos de ésta quisieran saquearnos de paso. Pero a las cinco de la tarde, convencidos de que no había ya cuidado, abrimos las tiendas y todo volvió a su estado normal. A la oración de la noche dirigió el señor presidente Carmena una comunicación violenta al jefe de las fuerzas de Nuevo

%p70-Soberon-2025-10-15%

León en El Cedral, para ponerlo al tanto del estado de este vecindario y que la población espera que a su entrada haga guardar el orden y respetar las propiedades, cuyo extraordinario volvió a las nueve de la noche.

Viernes 17

A las doce y media de la mañana entra en ésta el señor Quiroga con 200 rifleros con el mayor orden, a pesar de la multitud de plebe que había. En la cárcel rompieron la puerta interior los presos, pero el mismo señor Quiroga con sus ayudantes entró a caballo en la guardia pistola en mano y contuvo su desorden. Después mandó una guardia de 15 hombres con oficial y orden de hacer fuego sobre los que quieran echarse sobre la cárcel o robar alguna tienda.

En la tarde se reunió el Ayuntamiento, y concurrió a la sesión el señor Quiroga, quien les hizo presente que tiene orden de imponer un préstamo de $5 000 a la municipalidad, para lo cual da tres días de término, y quiere que dicho cuerpo nombre una comisión que haga las asignaciones.

Sábado 18

Recibe Quiroga un extraordinario por la mañana, y sale con su fuerza a las doce y media de la misma por El Cedral, sin que se sepa la causa.

Se asegura únicamente que Catorce se ha pronunciado por no pagar el préstamo.

Al irse el señor Quiroga deja una orden para que se presente D. Carlos B. Morales con su hijo, D. Carlos Francisco, pagando $1 000 de multa, o de lo contrario que se le embarguen sus intereses.

Domingo 19

A las doce del día llega el capitán Vidal Martínez con 50 hombres, y a las doce y media me llamó el presidente Carmona para hacerme ver una comunicación del señor Quiroga, en que dice entre otras cosas que a más de lo que a mí me toque de préstamo me haga pagar $500 de multa a las tres horas, o que quede preso a su disposición porque el mozo Doroteo Puente está preso, y no hice ninguna objeción al pedírmelo el comandante D. Carlos Francisco Morales la víspera de la acción. En

%p71-Soberon-2025-10-15%

el acto fui a ver al capitán Martínez para suplicarle oyera mis razones, pero me dijo no tener más facultades que recibir el dinero o mi persona, por lo que entregué los $500 a las siete de la noche, recogiendo recibo del presidente Carmena.

El alcalde 2o, D. Miguel Quijano, me ofreció acompañarme hasta donde esté el señor Quiroga para apoyar mis razones suplicatorias para que me exonere de la multa.

Lunes 20

Agustín Barrenechea, Francisco Hoyuela e Hilarión Gaitán, comisionados del Ayuntamiento para aplicar las cuotas en el préstamo de $5 000, presentan la lista y D. Cristóbal Puente expide los certificados. A nosotros nos tocan $250, y vamos en la tarde a exponer nuestras razones para ser más considerados ante el presidente Carmena, el cual nos dice que no tiene facultades para hacer rebajas, sino sólo para obligar a todos al pago.

Martes 22

A las 7 de la mañana fui acompañado del Alcalde 2o Quijano al Cedral, donde llegamos a las 9 de la hacienda de D. Zacarías Igueravide: estuvimos con el señor Quiroga a quien le hicimos presentes las razones que yo tuve para dar el mozo montado al señor Errazú.

Atendiendo a ellas me exoneró de la multa, y expidió una orden para que se me devuelva. A consecuencia de no haber podido el alcalde Carmena completar los $5 000 del préstamo ayer, le ordena el señor Quiroga que en castigo sean $10 000 completados a las 24 horas. Dicha orden la recibió anoche a las diez y media, y hoy fue comisionado el señor alcalde [2o Miguel] Quijano para suplicar a Quiroga [que] nos tenga consideración. En efecto cedió dicho señor, y rebajó $3 000, quedando el préstamo en $7 000, pero con la condición de que $5 000 y 50 caballos estén en El Cedral a las siete de la mañana, y los $2 000 restantes pasado mañana. Volvimos de El Cedral a las dos de la tarde, y encontramos en el camino otra comisión compuesta por D. Teodoro Castillo, D. Jesús Soriano y [D.] Agustín Barrenechea con el mismo objeto de suplicar al señor Quiroga releve al vecindario del asunto del préstamo. Volvieron a las siete de la noche habiendo conseguido que si a las seis de la mañana del jueves 23 están en El Cedral $5 000 y los 50 caballos, quedamos exonerados hasta de los $2 000 restantes. A consecuencia de esta disposición, queda completa y entregada la cantidad dicha

%p72-Soberon-2025-10-15%

al capitán D. Vidal Martínez a las diez de la noche por el presidente Carmona, habiendo completado en calidad de préstamo particular al presidente Carmona para liberar la población del duplo los siguientes:
